# Supplementary material for: Can temperate forests deliver both future wood demand and climate-change mitigation?
Source: Research Square preprint supplement (doi:10.21203/rs.3.rs-3681726/v1), 2023-12-14
Supplement: Supplementary file 1 [file 1385a3d0f5b6e1475ba015d2.xlsx]

## Sheet: Intro
Instructions for use:
1	Paste Harvest data into 'Goblin data' sheet
2	Select 'Core' or 'Further Ambition' decarbonisation pathway in 'Data input' sheet.
3	Export 'Results'
	This workbook can be duplicated and modified for different HWP value chains by replacing the data in sheets: 'MH_Efs' and 'HWP_C_data_MH' - copying and pasting the new data from the relevant supporting workbook for the new HWP value chain.

## Sheet: Goblin data
	Paste data from Goblin into columns C-F
		Exisit forest module		Afforestation module			Total
	Year	Main Harvest (ktonne C)		Main Harvest (ktonne C)			Main Harvest (ktonne C)
		Conifer MH	Broadleaf	Conifer MH	Broadleaf
1	2023	0					0
2	2024	71.7262					71.7262
3	2025	13.9779					13.9779
4	2026	21.7199					21.7199
5	2027	94.9523					94.9523
6	2028	35.9608					35.9608
7	2029	43.7029					43.7029
8	2030	118.178					118.178
9	2031	57.9454					57.9454
10	2032	65.6874					65.6874
11	2033	141.404					141.404
12	2034	143.916					143.916
13	2035	86.1674					86.1674
14	2036	163.124					163.124
15	2037	165.904					165.904
16	2038	106.912					106.912
17	2039	114.654					114.654
18	2040	189.13					189.13
19	2041	128.897					128.897
20	2042	136.639					136.639
21	2043	212.356					212.356
22	2044	181.66					181.66
23	2045	123.912					123.912
24	2046	211.638					211.638
25	2047	214.418					214.418
26	2048	155.426					155.426
27	2049	166.908					166.908
28	2050	241.383					241.383
29	2051	181.15					181.15
30	2052	188.892					188.892
31	2053	250.1					250.1
32	2054	252.611					252.611
33	2055	205.633					205.633
34	2056	282.59					282.59
35	2057	285.369					285.369
36	2058	230.117					230.117
37	2059	237.859					237.859
38	2060	312.334					312.334
39	2061	252.102					252.102
40	2062	259.844					259.844
41	2063	335.561					335.561
42	2064	323.562					323.562
43	2065	265.814					265.814
44	2066	353.541					353.541
45	2067	356.32					356.32
46	2068	16.3278					16.3278
47	2069	27.8094					27.8094
48	2070	102.285					102.285
49	2071	42.0519					42.0519
50	2072	49.7939					49.7939
51	2073	111.001					111.001
52	2074	49.5286					49.5286
53	2075	68.0406					68.0406
54	2076	144.997					144.997
55	2077	82.2863					82.2863
56	2078	89.5334					89.5334
57	2079	185.264					185.264
58	2080	121.706					121.706
59	2081	129.448					129.448
60	2082	208.49					208.49
61	2083	144.932					144.932
62	2084	138.165					138.165
63	2085	217.207					217.207
64	2086	164.418					164.418
65	2087	172.161					172.161
66	2088	251.203					251.203
67	2089	229.477					229.477
68	2090	165.919					165.919
69	2091	255.731					255.731
70	2092	263.473					263.473
71	2093	199.915					199.915
72	2094	211.396					211.396
73	2095	290.439					290.439
74	2096	226.88					226.88
75	2097	234.623					234.623
76	2098	313.665					313.665
77	2099	306.897					306.897
78	2100	243.339					243.339
79	2101	333.151					333.151
80	2102	340.893					340.893
81	2103	558.336					558.336
82	2104	569.818					569.818
83	2105	648.86					648.86
84	2106	585.302					585.302
85	2107	593.044					593.044
86	2108	672.086					672.086
87	2109	665.318					665.318
88	2110	601.76					601.76
89	2111	691.572					691.572
90	2112	699.314					699.314
91	2113	348.028					348.028
92	2114	359.509					359.509
93	2115	438.551					438.551
94	2116	374.993					374.993
95	2117	382.735					382.735
96	2118	461.777					461.777
97	2119	455.01					455.01
98	2120	391.452					391.452
99	2121	481.264					481.264
100	2122	489.006					489.006
		148.231

## Sheet: Data input
	Decarbonisation scenario:	Core	Select here
	Value chain:	Harvest data below is linked from 'Globlin data' sheet.
		Harvest quantity (000's of Mg C):
	Harvest year	Main harvest - Eire BAU (MH-BAU)
1	2023	0
2	2024	71.7262
3	2025	13.9779
4	2026	21.7199
5	2027	94.9523
6	2028	35.9608
7	2029	43.7029
8	2030	118.178
9	2031	57.9454
10	2032	65.6874
11	2033	141.404
12	2034	143.916
13	2035	86.1674
14	2036	163.124
15	2037	165.904
16	2038	106.912
17	2039	114.654
18	2040	189.13
19	2041	128.897
20	2042	136.639
21	2043	212.356
22	2044	181.66
23	2045	123.912
24	2046	211.638
25	2047	214.418
26	2048	155.426
27	2049	166.908
28	2050	241.383
29	2051	181.15
30	2052	188.892
31	2053	250.1
32	2054	252.611
33	2055	205.633
34	2056	282.59
35	2057	285.369
36	2058	230.117
37	2059	237.859
38	2060	312.334
39	2061	252.102
40	2062	259.844
41	2063	335.561
42	2064	323.562
43	2065	265.814
44	2066	353.541
45	2067	356.32
46	2068	16.3278
47	2069	27.8094
48	2070	102.285
49	2071	42.0519
50	2072	49.7939
51	2073	111.001
52	2074	49.5286
53	2075	68.0406
54	2076	144.997
55	2077	82.2863
56	2078	89.5334
57	2079	185.264
58	2080	121.706
59	2081	129.448
60	2082	208.49
61	2083	144.932
62	2084	138.165
63	2085	217.207
64	2086	164.418
65	2087	172.161
66	2088	251.203
67	2089	229.477
68	2090	165.919
69	2091	255.731
70	2092	263.473
71	2093	199.915
72	2094	211.396
73	2095	290.439
74	2096	226.88
75	2097	234.623
76	2098	313.665
77	2099	306.897
78	2100	243.339
79	2101	333.151
80	2102	340.893
81	2103	558.336
82	2104	569.818
83	2105	648.86
84	2106	585.302
85	2107	593.044
86	2108	672.086
87	2109	665.318
88	2110	601.76
89	2111	691.572
90	2112	699.314
91	2113	348.028
92	2114	359.509
93	2115	438.551
94	2116	374.993
95	2117	382.735
96	2118	461.777
97	2119	455.01
98	2120	391.452
99	2121	481.264
100	2122	489.006

## Sheet: Results
Results summary:		Reference flow (1000tC)													Mg CO2e
		C storage - HWPs:		C storage - BECCS:			Avoided emissions:						Process emissions:	Total (Ref)	Total	HWP C storage	BECCS C stroage	Avoided emissions	Process emisisons	Total (check)
Year		HWP - primary + recycled	HWP - mulch	BECCS - Biogenic C emissions primary - electricity	BECCS - Biogenic C emissions primary - heat	BECCS - Biogenic C emissions primary waste + secondary waste (electricity only)	Avoided emissions - FF (primary electricity, biomass+incineration)	Avoided emissions - FF (secondary electricity, biomass+incineration)	Avoided emissions - FF (biomass, heat)	Avoided emissions - FF (incineration, electricity)	Avoided emissions - FF (incineration, heat)	Avoided emissions - concrete	Primary process emissions	Total	MH-hierarchical
2023	2023	-2418.52	-182.689	0	0	0	-886.738	-51.3289	0	-14.2322	-0.171354	-2144.16	950.704	-4747.13	0	0	0	0	0	0
2024	2024	-4805.17	-363.551	0	0	0	-1773.48	-153.987	0	-42.6965	-0.514061	-4288.31	1901.41	-9526.3	-340494	-186575	0	-222109	68190.5	-340494
2025	2025	-7122.58	-542.586	0	0	0	-2660.21	-307.973	0	-85.3931	-1.02812	-6432.47	2852.11	-14300.1	-409146	-220517	0	-270108	81479.3	-409146
2026	2026	-9380.95	-719.794	0	0	0	-3546.95	-513.289	0	-142.322	-1.71354	-8576.63	3802.82	-19078.8	-512319	-271447	0	-343000	102128	-512319
2027	2027	-11588.2	-895.176	0	0	0	-4433.69	-769.934	0	-213.483	-2.5703	-10720.8	4753.52	-23870.3	-964041	-512347	0	-644093	192400	-964041
2028	2028	-13750.5	-1068.73	0	0	0	-5320.43	-900.199	0	-298.876	-3.59843	-12864.9	5704.23	-28503	-1.1316e+06	-596497	0	-761694	226588	-1.1316e+06
2029	2029	-15872.5	-1240.46	0	0	0	-6207.16	-1052.18	0	-398.501	-4.7979	-15009.1	6654.93	-33129.7	-1.333e+06	-696796	0	-904339	268137	-1.333e+06
2030	2030	-17957.9	-1410.36	-55.5759	0	-8.5508	-7016.49	-1210.7	0	-502.419	-6.16873	-17153.3	7605.64	-37715.8	-1.88265e+06	-989574	-6995.64	-1.26657e+06	380489	-1.88265e+06
2031	2031	-20009.7	-1578.43	-111.152	0	-18.1704	-7825.81	-1389.04	0	-619.326	-7.71091	-19297.4	8556.34	-42300.4	-2.14959e+06	-1.12164e+06	-10705.7	-1.45282e+06	435578	-2.14959e+06
2032	2032	-22030.2	-1744.68	-166.728	0	-28.8589	-8635.14	-1587.19	0	-749.223	-9.42445	-21441.6	9507.04	-46885.9	-2.45014e+06	-1.26915e+06	-14916.3	-1.66411e+06	498028	-2.45014e+06
2033	2033	-24021.1	-1909.1	-222.304	0	-40.6163	-9444.46	-1698.03	0	-892.11	-11.3093	-23585.7	10457.7	-51367	-3.09997e+06	-1.61175e+06	-23486	-2.0972e+06	632462	-3.09997e+06
2034	2034	-25983.8	-2071.69	-277.88	0	-53.4425	-10253.8	-1818.95	0	-1047.99	-13.3656	-25729.9	11408.5	-55842.4	-3.76032e+06	-1.95619e+06	-32349.2	-2.54105e+06	769283	-3.76032e+06
2035	2035	-27919.6	-2232.46	-333.456	0	-67.3375	-11063.1	-1949.93	0	-1216.85	-15.5932	-27874	12359.2	-60313.3	-4.14619e+06	-2.14294e+06	-38095	-2.81635e+06	851203	-4.14619e+06
2036	2036	-29829.4	-2391.4	-389.031	0	-82.3014	-11872.4	-2091	0	-1398.71	-17.9921	-30018.2	13309.9	-64780.6	-4.88983e+06	-2.52509e+06	-48292.1	-3.32273e+06	1.00629e+06	-4.88983e+06
2037	2037	-31714	-2548.51	-444.607	0	-98.3342	-12681.8	-2242.14	0	-1593.55	-20.5624	-32162.3	14260.6	-69245.2	-5.64594e+06	-2.90995e+06	-58821	-3.84118e+06	1.16401e+06	-5.64594e+06
2038	2038	-33573.9	-2703.8	-500.183	0	-115.436	-13491.1	-2403.36	0	-1801.39	-23.3041	-34306.5	15211.3	-73707.7	-6.12223e+06	-3.13382e+06	-66185.7	-4.18788e+06	1.26565e+06	-6.12223e+06
2039	2039	-35409.9	-2857.25	-555.759	0	-133.606	-14300.4	-2574.65	0	-2022.22	-26.2171	-36450.7	16162	-78168.7	-6.63249e+06	-3.37293e+06	-74103.2	-4.56011e+06	1.37466e+06	-6.63249e+06
2040	2040	-37222.2	-3008.89	-666.911	0	-172.085	-15032.3	-2738.68	0	-2233.67	-29.3015	-38594.8	17112.7	-82586.2	-7.48602e+06	-3.80342e+06	-98620.6	-5.13844e+06	1.55446e+06	-7.48602e+06
2041	2041	-39011.4	-3158.69	-778.063	0	-212.701	-15764.2	-2911.81	0	-2456.86	-32.5572	-40739	18063.4	-87002	-8.05794e+06	-4.07197e+06	-116718	-5.54626e+06	1.677e+06	-8.05794e+06
2042	2042	-40777.9	-3306.67	-889.215	0	-255.455	-16496.2	-3094.06	0	-2691.81	-35.9843	-42883.1	19014.1	-91416.3	-8.6629e+06	-4.35463e+06	-135969	-5.97921e+06	1.80691e+06	-8.6629e+06
2043	2043	-42521.9	-3452.82	-1000.37	0	-300.347	-17228.1	-3189.92	0	-2938.5	-39.5827	-45027.3	19964.8	-95734	-9.61105e+06	-4.83097e+06	-164090	-6.62479e+06	2.00879e+06	-9.61105e+06
2044	2044	-44244.3	-3597.14	-1111.52	0	-347.376	-17960	-3290.35	0	-3196.94	-43.3525	-47171.4	20915.5	-100047	-1.04141e+07	-5.22132e+06	-189187	-7.18508e+06	2.1815e+06	-1.04141e+07
2045	2045	-45944.9	-3739.64	-1222.67	0	-396.543	-18691.9	-3395.35	0	-3467.13	-47.2936	-49315.6	21866.2	-104355	-1.09438e+07	-5.45363e+06	-208130	-7.58132e+06	2.2993e+06	-1.09438e+07
2046	2046	-47623.9	-3880.31	-1333.82	0	-447.848	-19423.8	-3504.91	0	-3749.06	-51.4061	-51459.8	22816.9	-108658	-1.18803e+07	-5.91017e+06	-237276	-8.23336e+06	2.50051e+06	-1.18803e+07
2047	2047	-49281.6	-4019.16	-1444.97	0	-501.291	-20155.7	-3619.04	0	-4042.74	-55.6899	-53603.9	23767.6	-112957	-1.28293e+07	-6.36955e+06	-267190	-8.89693e+06	2.70436e+06	-1.28293e+07
2048	2048	-50918.3	-4156.17	-1556.13	0	-556.871	-20887.6	-3737.73	0	-4348.17	-60.1451	-55748.1	24718.3	-117251	-1.34996e+07	-6.66742e+06	-290879	-9.3934e+06	2.85212e+06	-1.34996e+07
2049	2049	-52534.2	-4291.36	-1667.28	0	-614.589	-21619.5	-3860.99	0	-4665.35	-64.7717	-57892.2	25669	-121541	-1.42206e+07	-6.98958e+06	-316201	-9.92564e+06	3.0108e+06	-1.42206e+07
2050	2050	-54129.5	-4424.73	-1945.16	0	-764.228	-22119.2	-3948.25	0	-4889.9	-69.0898	-59990.1	26619.7	-125660	-1.52546e+07	-7.50228e+06	-401491	-1.05911e+07	3.24028e+06	-1.52546e+07
2051	2051	-55704.4	-4556.26	-2223.04	0	-919.211	-22618.9	-4038.63	0	-5122.48	-73.5621	-62087.9	27570.4	-129774	-1.60127e+07	-7.85203e+06	-471012	-1.11022e+07	3.4125e+06	-1.60127e+07
2052	2052	-57259.3	-4685.97	-2500.92	0	-1079.54	-23118.6	-4132.13	0	-5363.07	-78.1887	-64185.8	28521.1	-133882	-1.68019e+07	-8.21483e+06	-543694	-1.16355e+07	3.59209e+06	-1.68019e+07
2053	2053	-58794.3	-4813.85	-2778.8	0	-1245.21	-23618.3	-4228.74	0	-5611.69	-82.9694	-66283.6	29471.8	-137986	-1.7868e+07	-8.73254e+06	-634720	-1.23306e+07	3.82986e+06	-1.7868e+07
2054	2054	-60309.7	-4939.91	-3056.68	0	-1416.23	-24117.9	-4328.47	0	-5868.32	-87.9044	-68381.4	30422.5	-142084	-1.8943e+07	-9.25014e+06	-727795	-1.30351e+07	4.07001e+06	-1.8943e+07
2055	2055	-61805.7	-5064.14	-3334.56	0	-1592.59	-24617.6	-4431.32	0	-6132.97	-92.9936	-70479.3	31373.2	-146178	-1.97999e+07	-9.63657e+06	-808914	-1.36199e+07	4.26551e+06	-1.97999e+07
2056	2056	-63282.5	-5186.54	-3612.43	0	-1774.29	-25117.3	-4537.28	0	-6405.65	-98.237	-72577.1	32324	-150267	-2.10029e+07	-1.02164e+07	-912928	-1.44078e+07	4.53417e+06	-2.10029e+07
2057	2057	-64740.3	-5307.11	-3890.31	0	-1961.34	-25617	-4646.36	0	-6686.34	-103.635	-74675	33274.7	-154353	-2.22162e+07	-1.07964e+07	-1.01924e+06	-1.52061e+07	4.80547e+06	-2.22162e+07
2058	2058	-66179.4	-5425.86	-4168.19	0	-2153.73	-26116.6	-4758.55	0	-6975.06	-109.187	-76772.8	34225.4	-158434	-2.31733e+07	-1.12226e+07	-1.11143e+06	-1.58635e+07	5.02424e+06	-2.31733e+07
2059	2059	-67599.9	-5542.78	-4446.07	0	-2351.47	-26616.3	-4873.87	0	-7271.79	-114.893	-78870.7	35176.1	-162512	-2.41617e+07	-1.16614e+07	-1.20704e+06	-1.65437e+07	5.25038e+06	-2.41617e+07
2060	2060	-69002.2	-5657.88	-4723.95	0	-2554.55	-27116	-4992.3	0	-7576.55	-120.753	-80968.5	36126.8	-166586	-2.54874e+07	-1.22888e+07	-1.32501e+06	-1.74209e+07	5.54732e+06	-2.54874e+07
2061	2061	-70386.3	-5771.14	-5001.83	0	-2762.98	-27615.7	-5113.84	0	-7889.32	-126.767	-83066.3	37077.5	-170657	-2.65368e+07	-1.27517e+07	-1.4276e+06	-1.81445e+07	5.78699e+06	-2.65368e+07
2062	2062	-71752.6	-5882.58	-5279.71	0	-2976.75	-28115.3	-5238.5	0	-8210.11	-132.936	-85164.2	38028.2	-174725	-2.76168e+07	-1.3226e+07	-1.53372e+06	-1.88911e+07	6.03402e+06	-2.76168e+07
2063	2063	-73101.3	-5992.2	-5557.59	0	-3195.86	-28615	-5366.28	0	-8538.93	-139.259	-87262	38978.9	-178790	-2.90392e+07	-1.38915e+07	-1.66268e+06	-1.98381e+07	6.35304e+06	-2.90392e+07
2064	2064	-74432.5	-6099.98	-5835.47	0	-3420.32	-29114.7	-5497.18	0	-8875.76	-145.736	-89359.9	39929.6	-182852	-3.04041e+07	-1.45171e+07	-1.79003e+06	-2.07577e+07	6.66066e+06	-3.04041e+07
2065	2065	-75746.4	-6205.94	-6113.35	0	-3650.12	-29614.4	-5631.19	0	-9220.61	-152.368	-91457.7	40880.3	-186912	-3.15011e+07	-1.49815e+07	-1.90276e+06	-2.15303e+07	6.91337e+06	-3.15011e+07
2066	2066	-77043.4	-6310.07	-6391.23	0	-3885.27	-30114	-5768.32	0	-9573.48	-159.153	-93555.6	41831	-190970	-3.29932e+07	-1.56663e+07	-2.04175e+06	-2.25347e+07	7.24948e+06	-3.29932e+07
2067	2067	-78323.6	-6412.38	-6669.11	0	-4125.76	-30613.7	-5908.56	0	-9934.38	-166.093	-95653.4	42781.7	-195025	-3.4496e+07	-1.63504e+07	-2.18342e+06	-2.35503e+07	7.58823e+06	-3.4496e+07
2068	2068	-79587.1	-6512.86	-6946.99	0	-4371.6	-31113.4	-6051.93	0	-10303.3	-173.187	-97751.2	43732.4	-199079	-3.44487e+07	-1.61387e+07	-2.2307e+06	-2.36831e+07	7.60376e+06	-3.44487e+07
2069	2069	-80834.3	-6611.51	-7224.87	0	-4622.78	-31613.1	-6198.4	0	-10680.2	-180.435	-99849.1	44683.1	-203132	-3.44546e+07	-1.59575e+07	-2.28132e+06	-2.38459e+07	7.6302e+06	-3.44546e+07
2070	2070	-82065.2	-6708.34	-7502.75	0	-4879.3	-32112.8	-6348	0	-11065.2	-187.838	-101947	45633.8	-207183	-3.48128e+07	-1.59837e+07	-2.35319e+06	-2.42034e+07	7.72744e+06	-3.48128e+07
2071	2071	-83280.2	-6803.33	-7780.63	0	-5141.17	-32612.4	-6500.71	0	-11458.1	-195.395	-104045	46584.5	-211232	-3.4907e+07	-1.58611e+07	-2.40853e+06	-2.44049e+07	7.76742e+06	-3.4907e+07
2072	2072	-84479.5	-6896.51	-8058.51	0	-5408.38	-33112.1	-6656.54	0	-11859.1	-203.105	-106143	47535.2	-215281	-3.50419e+07	-1.57634e+07	-2.4663e+06	-2.4627e+07	7.81476e+06	-3.50419e+07
2073	2073	-85663.1	-6987.85	-8336.39	0	-5680.94	-33611.8	-6730.97	0	-12268.1	-210.971	-108240	48485.9	-219245	-3.54479e+07	-1.58309e+07	-2.54167e+06	-2.49956e+07	7.92029e+06	-3.54479e+07
2074	2074	-86831.4	-7077.37	-8614.27	0	-5958.84	-34111.5	-6806.87	0	-12685.2	-218.99	-110338	49436.6	-223206	-3.55788e+07	-1.57409e+07	-2.60022e+06	-2.5205e+07	7.96737e+06	-3.55788e+07
2075	2075	-87984.5	-7165.06	-8892.15	0	-6242.08	-34611.1	-6884.22	0	-13110.2	-227.164	-110338	50387.3	-225067	-3.56529e+07	-1.57003e+07	-2.66428e+06	-2.53204e+07	8.03206e+06	-3.56529e+07
2076	2076	-89122.6	-7250.92	-9170.03	0	-6530.67	-35110.8	-6963.04	0	-13543.3	-235.491	-112436	51338	-229025	-3.6223e+07	-1.58626e+07	-2.7505e+06	-2.57798e+07	8.16991e+06	-3.6223e+07
2077	2077	-90245.9	-7334.96	-9447.91	0	-6824.61	-35110.8	-7043.31	0	-13984.4	-243.973	-114534	52288.7	-232481	-3.64683e+07	-1.58607e+07	-2.81973e+06	-2.6036e+07	8.24814e+06	-3.64683e+07
2078	2078	-91354.7	-7417.17	-9725.79	0	-7123.88	-35610.5	-7125.04	0	-14433.5	-252.61	-116632	53239.5	-236436	-3.67866e+07	-1.58754e+07	-2.89145e+06	-2.6353e+07	8.33326e+06	-3.67866e+07
2079	2079	-92449	-7497.55	-10003.7	0	-7428.51	-36110.2	-7208.24	0	-14890.6	-261.4	-118730	54190.2	-240389	-3.75413e+07	-1.61395e+07	-2.99077e+06	-2.69204e+07	8.50939e+06	-3.75413e+07
2080	2080	-93529.1	-7576.11	-10281.5	0	-7738.47	-36609.8	-7292.89	0	-15355.8	-270.345	-120828	55140.9	-244341	-3.80068e+07	-1.62349e+07	-3.07307e+06	-2.7324e+07	8.6251e+06	-3.80068e+07
2081	2081	-94595.2	-7652.84	-10559.4	0	-8053.78	-37109.5	-7379	0	-15829	-279.444	-122925	56091.6	-248292	-3.85045e+07	-1.63456e+07	-3.15822e+06	-2.77489e+07	8.74816e+06	-3.85045e+07
2082	2082	-95647.5	-7727.74	-10837.3	0	-8374.44	-37609.2	-7466.57	0	-16310.1	-288.697	-125023	57042.3	-252243	-3.93611e+07	-1.666e+07	-3.26644e+06	-2.83811e+07	8.94638e+06	-3.93611e+07
2083	2083	-96686.1	-7800.82	-11115.2	0	-8700.44	-38108.9	-7555.6	0	-16799.4	-298.104	-127121	57993	-256193	-3.99276e+07	-1.68044e+07	-3.35778e+06	-2.88496e+07	9.08416e+06	-3.99276e+07
2084	2084	-97711.2	-7872.06	-11393.1	0	-9031.78	-38608.6	-7646.09	0	-17296.6	-307.665	-129219	58943.7	-260142	-4.04601e+07	-1.69257e+07	-3.44798e+06	-2.93019e+07	9.21552e+06	-4.04601e+07
2085	2085	-98723.1	-7941.49	-11948.8	-108.669	-9705.16	-38721.2	-7666.81	0	-17410.5	-307.665	-131258	59547.9	-264244	-4.13927e+07	-1.72508e+07	-3.69823e+06	-2.97904e+07	9.34675e+06	-4.13927e+07
2086	2086	-99721.8	-8009.08	-12504.6	-217.338	-10389.2	-38833.8	-7687.87	0	-17526.1	-307.665	-133297	60152	-268343	-4.2069e+07	-1.74342e+07	-3.91516e+06	-3.01657e+07	9.44608e+06	-4.2069e+07
2087	2087	-100708	-8074.85	-13060.3	-326.008	-11084	-38946.4	-7709.25	0	-17643.6	-307.665	-135336	60756.2	-272440	-4.27794e+07	-1.76324e+07	-4.13907e+06	-3.05581e+07	9.5501e+06	-4.27794e+07
2088	2088	-101681	-8138.79	-13616.1	-434.677	-11789.4	-39059	-7730.96	0	-17762.9	-307.665	-137376	61360.4	-276535	-4.38706e+07	-1.80332e+07	-4.41819e+06	-3.1121e+07	9.70187e+06	-4.38706e+07
2089	2089	-102641	-8200.9	-14171.9	-543.346	-12505.5	-39171.6	-7753	0	-17884	-307.665	-139415	61964.5	-280629	-4.48541e+07	-1.83715e+07	-4.68532e+06	-3.16377e+07	9.84051e+06	-4.48541e+07
2090	2090	-103589	-8261.19	-14727.6	-652.015	-13232.4	-39284.2	-7775.36	0	-18006.9	-307.665	-141454	62568.7	-284722	-4.55259e+07	-1.85366e+07	-4.912e+06	-3.2018e+07	9.94076e+06	-4.55259e+07
2091	2091	-104525	-8319.65	-15283.4	-760.685	-13969.9	-39396.9	-7798.06	0	-18131.6	-307.665	-143493	63172.9	-288813	-4.66293e+07	-1.89313e+07	-5.20109e+06	-3.25921e+07	1.00953e+07	-4.66293e+07
2092	2092	-105449	-8376.29	-15839.1	-869.354	-14718.1	-39509.5	-7821.09	0	-18258.2	-307.665	-145532	63777.1	-292903	-4.77692e+07	-1.93421e+07	-5.49814e+06	-3.31835e+07	1.02544e+07	-4.77692e+07
2093	2093	-106361	-8431.09	-16394.9	-978.023	-15476.9	-39622.1	-7844.44	0	-18386.5	-307.665	-147571	64381.2	-296992	-4.85977e+07	-1.95794e+07	-5.75509e+06	-3.36385e+07	1.03752e+07	-4.85977e+07
2094	2094	-107261	-8484.07	-16950.7	-1086.69	-16246.5	-39734.7	-7868.13	0	-18516.6	-307.665	-149611	64985.4	-301081	-4.94788e+07	-1.98413e+07	-6.02193e+06	-3.41186e+07	1.05029e+07	-4.94788e+07
2095	2095	-108149	-8535.23	-17506.4	-1195.36	-17026.8	-39847.3	-7892.14	0	-18648.6	-307.665	-151650	65589.6	-305169	-5.07413e+07	-2.03059e+07	-6.34439e+06	-3.47694e+07	1.06784e+07	-5.07413e+07
2096	2096	-109026	-8584.55	-18062.2	-1304.03	-17817.7	-39959.9	-7916.48	0	-18782.3	-307.665	-153689	66193.7	-309256	-5.16947e+07	-2.05991e+07	-6.62705e+06	-3.5284e+07	1.08155e+07	-5.16947e+07
2097	2097	-109892	-8632.05	-18617.9	-1412.7	-18619.4	-40072.6	-7941.15	0	-18917.9	-307.665	-155728	66797.9	-313343	-5.26816e+07	-2.09057e+07	-6.91736e+06	-3.58157e+07	1.09573e+07	-5.26816e+07
2098	2098	-110746	-8677.72	-19173.7	-1521.37	-19431.7	-40185.2	-7966.15	0	-19055.3	-307.665	-157767	67402.1	-317431	-5.4049e+07	-2.1414e+07	-7.26354e+06	-3.65182e+07	1.11468e+07	-5.4049e+07
2099	2099	-111590	-8721.57	-19729.5	-1630.04	-20254.7	-40297.8	-7991.48	0	-19194.4	-307.665	-159807	68006.3	-321518	-5.5381e+07	-2.18979e+07	-7.60851e+06	-3.72068e+07	1.13322e+07	-5.5381e+07
2100	2100	-112423	-8763.59	-20285.2	-1738.71	-21088.4	-40410.4	-8017.14	0	-19335.4	-307.665	-161846	68610.4	-325605	-5.64008e+07	-2.22071e+07	-7.91384e+06	-3.77591e+07	1.14792e+07	-5.64008e+07
2101	2101	-113245	-8803.78	-20841	-1847.38	-21932.8	-40523	-8043.12	0	-19478.2	-307.665	-163885	69214.6	-329693	-5.7851e+07	-2.27436e+07	-8.28242e+06	-3.85054e+07	1.16805e+07	-5.7851e+07
2102	2102	-114057	-8842.14	-21396.7	-1956.05	-22787.9	-40635.6	-8069.44	0	-19622.8	-307.665	-165924	69818.8	-333781	-5.93365e+07	-2.32941e+07	-8.65977e+06	-3.92691e+07	1.18864e+07	-5.93365e+07
2103	2103	-114858	-8878.68	-21952.5	-2064.72	-23653.6	-40748.2	-8096.08	0	-19769.2	-307.665	-167963	70423	-337869	-6.18659e+07	-2.44002e+07	-9.18757e+06	-4.05019e+07	1.22238e+07	-6.18659e+07
2104	2104	-115650	-8913.39	-22508.2	-2173.38	-24530.1	-40860.9	-8123.06	0	-19917.4	-307.665	-170002	71027.1	-341959	-6.4441e+07	-2.55194e+07	-9.72909e+06	-4.17606e+07	1.2568e+07	-6.4441e+07
2105	2105	-116431	-8946.28	-23064	-2282.05	-25417.2	-40973.5	-8150.36	0	-20067.5	-307.665	-172042	71631.3	-346049	-6.73803e+07	-2.68196e+07	-1.03301e+07	-4.31907e+07	1.29601e+07	-6.73803e+07
2106	2106	-117202	-8977.33	-23619.8	-2390.72	-26315.1	-41086.1	-8177.99	0	-20219.3	-307.665	-174081	72235.5	-350141	-6.99963e+07	-2.79296e+07	-1.08951e+07	-4.44854e+07	1.33137e+07	-6.99963e+07
2107	2107	-117963	-9006.56	-24175.5	-2499.39	-27223.6	-41198.7	-8205.95	0	-20372.9	-307.665	-176120	72839.6	-354234	-7.26338e+07	-2.90362e+07	-1.14715e+07	-4.5798e+07	1.3672e+07	-7.26338e+07
2108	2108	-118715	-9033.97	-24731.3	-2608.06	-28142.8	-41311.3	-8234.24	0	-20528.4	-307.665	-178159	73443.8	-358328	-7.56415e+07	-3.03298e+07	-1.21077e+07	-4.72821e+07	1.4078e+07	-7.56415e+07
2109	2109	-119457	-9059.54	-25287	-2716.73	-29072.7	-41423.9	-8262.86	0	-20685.6	-307.665	-180198	74048	-362423	-7.8605e+07	-3.15854e+07	-1.27465e+07	-4.8753e+07	1.448e+07	-7.8605e+07
2110	2110	-120190	-9083.29	-25842.8	-2825.4	-30013.3	-41536.6	-8291.8	0	-20844.7	-307.665	-182238	74652.2	-366520	-8.12483e+07	-3.26538e+07	-1.33495e+07	-5.00885e+07	1.48436e+07	-8.12483e+07
2111	2111	-120913	-9105.21	-26398.6	-2934.07	-30964.6	-41649.2	-8321.08	0	-21005.5	-307.665	-184277	75256.3	-370619	-8.4315e+07	-3.39381e+07	-1.40196e+07	-5.16187e+07	1.52614e+07	-8.4315e+07
2112	2112	-121628	-9125.31	-26954.3	-3042.74	-31926.5	-41761.8	-8350.68	0	-21168.2	-307.665	-186316	75860.5	-374720	-8.74108e+07	-3.52254e+07	-1.47023e+07	-5.31671e+07	1.56839e+07	-8.74108e+07
2113	2113	-122333	-9143.58	-27510.1	-3151.41	-32899.2	-41874.4	-8380.62	0	-21332.7	-307.665	-188355	76464.7	-378823	-8.87999e+07	-3.55785e+07	-1.51553e+07	-5.39603e+07	1.58942e+07	-8.87999e+07
2114	2114	-123029	-9160.02	-28065.8	-3260.08	-33882.5	-41987	-8410.88	0	-21499	-307.665	-190394	77068.9	-382928	-9.02412e+07	-3.59539e+07	-1.56198e+07	-5.47789e+07	1.61114e+07	-9.02412e+07
2115	2115	-123717	-9174.64	-28621.6	-3368.75	-34876.6	-42099.6	-8441.47	0	-21667.1	-307.665	-192433	77673	-387035	-9.20748e+07	-3.65411e+07	-1.61414e+07	-5.57686e+07	1.63763e+07	-9.20748e+07
2116	2116	-124396	-9187.42	-29177.4	-3477.42	-35881.3	-42212.3	-8472.39	0	-21837	-307.665	-194473	78277.2	-391145	-9.36077e+07	-3.69633e+07	-1.66249e+07	-5.66224e+07	1.66029e+07	-9.36077e+07
2117	2117	-125067	-9198.39	-29733.1	-3586.09	-36896.7	-42324.9	-8503.64	0	-22008.7	-307.665	-196512	78881.4	-395257	-9.51803e+07	-3.74032e+07	-1.71176e+07	-5.74936e+07	1.68341e+07	-9.51803e+07
2118	2118	-125729	-9207.52	-30288.9	-3694.75	-37922.8	-42437.5	-8535.22	0	-22182.2	-307.665	-198551	79485.5	-399371	-9.71382e+07	-3.80478e+07	-1.76677e+07	-5.85359e+07	1.71131e+07	-9.71382e+07
2119	2119	-126383	-9214.83	-30844.6	-3803.42	-38959.6	-42550.1	-8567.13	0	-22357.5	-307.665	-200590	80089.7	-403489	-9.90643e+07	-3.86696e+07	-1.82182e+07	-5.95646e+07	1.7388e+07	-9.90643e+07
2120	2120	-127029	-9220.31	-31400.4	-3912.09	-40007	-42662.7	-8599.36	0	-22534.7	-307.665	-202629	80693.9	-407609	-1.00681e+08	-3.91174e+07	-1.87307e+07	-6.04574e+07	1.76245e+07	-1.00681e+08
2121	2121	-127667	-9223.96	-31400.4	-3912.09	-40007	-42662.7	-8599.36	0	-22534.7	-307.665	-202629	80693.9	-408250	-1.01356e+08	-3.97927e+07	-1.87307e+07	-6.04574e+07	1.76245e+07	-1.01356e+08
2122	2122	-128297	-9225.79	-31400.4	-3912.09	-40007	-42662.7	-8599.36	0	-22534.7	-307.665	-202629	80693.9	-408882	-1.02045e+08	-4.04817e+07	-1.87307e+07	-6.04574e+07	1.76245e+07	-1.02045e+08

## Sheet: MH_EFs
Information required from main Goblin model (Emissions Factors, pasted from 'HWP module - Main harvest - Eire BAU' - HWPgoblin)
Inputs required from Goblin:	Thinning:	Year of cut	000s of tonnes C
		e.g. 2020	100
	Harvest:	Year of cut	000s of tonnes C
		e.g. 2020	1000
User inputs:	BECCS application:	Core or FA
	Value chain:	Hierarchical/Biomass
HWP module outputs:
Outputs from HWP module:	Net GWP
Other explicit data, if desired:	C storage - HWP
	C storage - BECCS
	Avoided emissions - FF
	Avoided emissions - concrete
	Process emissions
Proposed calculation methodology:
All of the numbers shown in the calculation methodology below are based on a harvest/thin of 1000 tonnes C (in an unassigned year). The results will be scaled up using the input tonnage values from goblin.
The total tonnage harvested in a given year across the landscape will be summed (before entering this HWP module?) and the impact for that/each year will be calculated separately. Then the impact for each year will be summed up to give a total landscape HWP impact.
Each year is calculated separately because the year of cut will impact the correct selection of the appropriate decarbonisation factors, as well as the number of years of retiral/decay of products from the HWP carbon pool. I currently assume Goblin models a 100 yr period.
	All units below are in Mg CO2e
C storage - HWPs:
	yr of harvest	Yrs 1-10	Yrs 10-50	Yrs 50-100	(years following harvest)
HWP - primary + recycled (no decarbonisation factor)	-2418.52	-44.2303	-20.181	-11.0746	decreasing by this much each year
	storage in yr of harvest	Estimated average loss annually over 100 yrs
HWP - mulch - assume averaged loss per annum	-182.689	-1.82689
C storage - BECCS:
BECCS - Biogenic C emissions primary - electricity	-617.51	one off value in year of harvest (without decarbonisation factor applied yet)								(Pasted from 'C graphs (Yr1)'…
BECCS - Biogenic C emissions primary - heat	-268.319	one off value in year of harvest (without decarbonisation factor applied yet)									2020-2029		2030-2039		2040-2049		2050-2084		2085-2120
BECCS - Biogenic C emissions primary waste + secondary waste (electricity only) (average annual accumulation over 100yrs)	-11.8761	average annual biogenic emissions (without decarbonisation factor applied yet)									Core	FA	Core	FA	Core	FA	Core	FA	Core	FA
										Avoided emissions - Biomass (heat) - marginal supply	none	none	none	none	none	0.25258	0.9	0.039435	0	0
Avoided emissions:										Avoided emissions - Biomass (electricity) - marginal supply	none	none	0.9127	0.5635	0.8254	0.127	0.5635	0	0.127	0
Avoided emissions - FF (primary electricity, biomass+incineration)	-886.738	one off value in year of harvest (without decarbonisation factor applied yet)								Avoided emissions - Incineration (electricity) - marginal supply	none	none	0.9127	0.5635	0.8254	0.127	0.5635	0	0.127	0
Avoided emissions - FF (secondary electricity, biomass+incineration)	years 1-5	Years 5-10	Years 10-20	Years 20-50	Years 50-100	(years following harvest)				Incineration (heat) - marginal supply	none	none	none	none	none	0	0.9	0.136905	0	0
	-51.3289	-21.7109	-11.0399	-5.53072	-2.59009	annual avoided emissions (without decarbonisation factors applied yet)				C storage - BECCS (biomass electricity)	none	none	0.09	0.45	0.18	0.9	0.45	1	0.9	1
Avoided emissions - FF (biomass, heat)	0	one off value in year of harvest (without decarbonisation factor applied yet)								C storage - BECCS (biomass heat)	none	none	0	0	0	0.405	0	0.81	0.405	0.9
Avoided emissions - FF (incineration, electricity)	-14.2322	average annual avoided emissions (without decarbonisation factor applied yet)								Avoided emissions - Cement production - CCS application (calcination)	n/a	n/a	n/a	n/a	n/a	n/a	none	0.45568	0.93952	0.3952
Avoided emissions - FF (incineration, heat) - could be disregarded on grounds of small relative impact	-0.171354	average annual avoided emissions (without decarbonisation factor applied yet)								Avoided emissions - Cement production - furnace emissions reduction	n/a	n/a	n/a	n/a	n/a	n/a	0.9784	0.95104	0.95104	0.712
										Emissions - Wood panel (particle board) production (CCS on heat production)	none	none	none	none	none	0.6355	none	0.271	0.6355	0.19
	yr of harvest									Emissions - Harvester/forwarder	none	none	none	none	none	0.55	0.87	0.1	0	0
Avoided emissions - concrete	-2144.16	one off value (without decarbonisation factor applied yet)
Process emissions:
	yr of harvest
Primary process emissions	950.704	one off value ( decarbonisation factor required)
Secondary process emissions - disregard	n/a	effectively a one off value (in reality its an annual decaying emission that drops to nearly zero after about 15 yrs)
Net:
sum of above

## Sheet: HWP_C_data_MH
Decay Calculations - primary HWP:
As per IPCC Equation 12.1
							Green tonnes	m3	tonnes C
						thin1 (yr21)	0	0	0
						thin2 (yr71)	0	0	0
						harvest1 (no thin) (yr50)	597.317	1651.78	155.396
						harvest2 (no thin) (yr100)	610.374	1687.89	158.793
						harvest1 (thinned) (yr50)	3843.84	10629.5	1000
						harvest2 (thinned) (yr100)	0	0	0
						Conversion from green tonnes to tonnes C:	0.260156			C content of dry wood	0.4995
										moisture content of green wood	0.92
	c(i)= C in year 0 = 0
	c(i+100) = C in yr 100
	Calculation of Inflows:
						Harvest 1 (no thin)	Harvest 2 (no thin)	Harvest 1 (thinned)	Harvest 2 (thinned)
Losses at construction site:	Particle/fibre board	0	(Not using this)			kg (dry wood)
	Carcassing	0.095	Going to panel production	0.800144	0.0760137
			Going to biomas (energy)	0.199856	0.0189863	941.744	962.33	6820.68	0
					Inflows (green tonnes)						Inflows (Gg C)								Decay rate
	Primary Use	Thin	harvest (unthinned)	harvest (thinned)	Thin1 (yr21)	Thin2 (yr71)	harvest1 (unthinned) (yr50)	harvest2 (unthinned) (yr100)	harvest1 (thinned) (yr50)	harvest2 (thinned) (yr100)	harvest1 (unthinned) (yr50)	harvest2 (unthinned) (yr100)	harvest1 (thinned) (yr50)	harvest2 (thinned) (yr100)	Thin1 (yr21)	Thin2 (yr71)		Half life (yrs)	(k) (units per year)	Fraction lost/yr (ln2/half life)
	Particle board (chip+OSB)	0.223214	0.17989	0.174817	0	0	107.451	109.8	671.967	0	0.0279542	0.0285652	0.174817	0	0	0		30	0.0231049	0.0231
	Fibre board	0.0744048	0.0599634	0.0582722	0	0	35.8172	36.6001	223.989	0	0.00931806	0.00952175	0.0582722	0	0	0		20	0.0346574	0.0347
	Biomass	0.369048	0.0668188	0.0731779	0	0	39.912	40.7844	281.285	0	0.0103834	0.0106103	0.0731779	0	0	0		n/a	n/a	n/a
	Pulp (paper)	0	0.0246452	0.0169738	0	0	14.721	15.0428	65.2445	0	0.00382975	0.00391347	0.0169738	0	0	0		2	0.346574	0.3466
	Fence poles	0.297619	0.0463564	0.0388885	0	0	27.6895	28.2947	149.481	0	0.00720359	0.00736105	0.0388885	0	0	0		18	0.0385082	0.0385
	Pallets and packaging	0	0.157393	0.169741	0	0	94.0134	96.0685	652.457	0	0.0244582	0.0249928	0.169741	0	0	0		3	0.231049	0.231
	Fencing	0	0.0631285	0.070308	0	0	37.7077	38.532	270.253	0	0.0098099	0.0100243	0.070308	0	0	0		18	0.0385082	0.0385
	Carcassing	0	0.159437	0.179441	0	0	95.2342	97.3159	689.743	0	0.0224221	0.0229122	0.162394	0	0	0	50	90	0.00770164	0.00770164
	Mulch	0.0357143	0.0481307	0.0498242	0	0	28.7493	29.3777	191.517	0	0.0074793	0.00764279	0.0498242	0	0	0		n/a	n/a	n/a
		1	0.805763	0.831443						total (wood products, not including mulch or biomass)	0.101166	0.103377	0.67442	0	0	0
										total (paper products)	0.00382975	0.00391347	0.0169738	0	0	0
	Inflow in all non harvest/thin years:	0												0.691394
	Decay rate, k=	0.0231049	0.0346574	n/a	0.346574	0.0385082	0.231049	0.0385082	0.00770164	n/a
	Unthinned											Thinned
	yr	Particle board (chip+OSB)	Fibre board	Biomass	Pulp (paper)	Fence poles	Pallets and packaging	Fencing	Carcassing	Mulch		Particle board	Fibre board	Biomass	Pulp (paper)	Fence poles	Pallets and packaging	Fencing	Carcassing	Mulch	Total	sum of all but biomass and paper
	0	0	0	0	0	0	0	0	0	0		0	0	0	0	0	0	0	0	0	0	0
	1	0	0	0	0	0	0	0	0	0		0	0	0	0	0	0	0	0	0	0	0
	2	0	0	0	0	0	0	0	0	0		0	0	0	0	0	0	0	0	0	0	0
	3	0	0	0	0	0	0	0	0	0		0	0	0	0	0	0	0	0	0	0	0
	4	0	0	0	0	0	0	0	0	0		0	0	0	0	0	0	0	0	0	0	0
	5	0	0	0	0	0	0	0	0	0		0	0	0	0	0	0	0	0	0	0	0
	6	0	0	0	0	0	0	0	0	0		0	0	0	0	0	0	0	0	0	0	0
	7	0	0	0	0	0	0	0	0	0		0	0	0	0	0	0	0	0	0	0	0
	8	0	0	0	0	0	0	0	0	0		0	0	0	0	0	0	0	0	0	0	0
	9	0	0	0	0	0	0	0	0	0		0	0	0	0	0	0	0	0	0	0	0
	10	0	0	0	0	0	0	0	0	0		0	0	0	0	0	0	0	0	0	0	0
	11	0	0	0	0	0	0	0	0	0		0	0	0	0	0	0	0	0	0	0	0
	12	0	0	0	0	0	0	0	0	0		0	0	0	0	0	0	0	0	0	0	0
	13	0	0	0	0	0	0	0	0	0		0	0	0	0	0	0	0	0	0	0	0
	14	0	0	0	0	0	0	0	0	0		0	0	0	0	0	0	0	0	0	0	0
	15	0	0	0	0	0	0	0	0	0		0	0	0	0	0	0	0	0	0	0	0
	16	0	0	0	0	0	0	0	0	0		0	0	0	0	0	0	0	0	0	0	0
	17	0	0	0	0	0	0	0	0	0		0	0	0	0	0	0	0	0	0	0	0
	18	0	0	0	0	0	0	0	0	0		0	0	0	0	0	0	0	0	0	0	0
	19	0	0	0	0	0	0	0	0	0		0	0	0	0	0	0	0	0	0	0	0
	20	0	0	0	0	0	0	0	0	0		0	0	0	0	0	0	0	0	0	0	0
	21	0	0	0	0	0	0	0	0	0		0	0	0	0	0	0	0	0	0	0	0
	22	0	0	0	0	0	0	0	0	0		0	0	0	0	0	0	0	0	0	0	0
	23	0	0	0	0	0	0	0	0	0		0	0	0	0	0	0	0	0	0	0	0
	24	0	0	0	0	0	0	0	0	0		0	0	0	0	0	0	0	0	0	0	0
	25	0	0	0	0	0	0	0	0	0		0	0	0	0	0	0	0	0	0	0	0
	26	0	0	0	0	0	0	0	0	0		0	0	0	0	0	0	0	0	0	0	0
	27	0	0	0	0	0	0	0	0	0		0	0	0	0	0	0	0	0	0	0	0
	28	0	0	0	0	0	0	0	0	0		0	0	0	0	0	0	0	0	0	0	0
	29	0	0	0	0	0	0	0	0	0		0	0	0	0	0	0	0	0	0	0	0
	30	0	0	0	0	0	0	0	0	0		0	0	0	0	0	0	0	0	0	0	0
	31	0	0	0	0	0	0	0	0	0		0	0	0	0	0	0	0	0	0	0	0
	32	0	0	0	0	0	0	0	0	0		0	0	0	0	0	0	0	0	0	0	0
	33	0	0	0	0	0	0	0	0	0		0	0	0	0	0	0	0	0	0	0	0
	34	0	0	0	0	0	0	0	0	0		0	0	0	0	0	0	0	0	0	0	0
	35	0	0	0	0	0	0	0	0	0		0	0	0	0	0	0	0	0	0	0	0
	36	0	0	0	0	0	0	0	0	0		0	0	0	0	0	0	0	0	0	0	0
	37	0	0	0	0	0	0	0	0	0		0	0	0	0	0	0	0	0	0	0	0
	38	0	0	0	0	0	0	0	0	0		0	0	0	0	0	0	0	0	0	0	0
	39	0	0	0	0	0	0	0	0	0		0	0	0	0	0	0	0	0	0	0	0
	40	0	0	0	0	0	0	0	0	0		0	0	0	0	0	0	0	0	0	0	0
	41	0	0	0	0	0	0	0	0	0		0	0	0	0	0	0	0	0	0	0	0
	42	0	0	0	0	0	0	0	0	0		0	0	0	0	0	0	0	0	0	0	0
	43	0	0	0	0	0	0	0	0	0		0	0	0	0	0	0	0	0	0	0	0
	44	0	0	0	0	0	0	0	0	0		0	0	0	0	0	0	0	0	0	0	0
	45	0	0	0	0	0	0	0	0	0		0	0	0	0	0	0	0	0	0	0	0
	46	0	0	0	0	0	0	0	0	0		0	0	0	0	0	0	0	0	0	0	0
	47	0	0	0	0	0	0	0	0	0		0	0	0	0	0	0	0	0	0	0	0
	48	0	0	0	0	0	0	0	0	0		0	0	0	0	0	0	0	0	0	0	0
	49	0	0	0	0	0	0	0	0	0		0	0	0	0	0	0	0	0	0	0	0
	50	0.0276337	0.00915844	0	0.00323657	0.00608783	0.0218383	0.00962342	0.0223359	0		0.172812	0.057274	0	0.0143447	0.0328651	0.151558	0.0689715	0.16177	0	0.659597	0.645252
	51	0.0270026	0.00884647	0	0.0022886	0.00430475	0.017333	0.00925989	0.0221646	0		0.168865	0.055323	0	0.0101432	0.0232391	0.120292	0.066366	0.160529	0	0.604758	0.594615
	52	0.0263858	0.00854513	0	0.00161828	0.00304392	0.0137572	0.00891009	0.0219945	0		0.165009	0.0534385	0	0.00717236	0.0164326	0.0954759	0.0638589	0.159298	0	0.560684	0.553512
	53	0.0257832	0.00825405	0	0.0011443	0.00215237	0.0109191	0.0085735	0.0218258	0		0.16124	0.0516182	0	0.00507162	0.0116196	0.0757792	0.0614466	0.158076	0	0.52485	0.519779
	54	0.0251943	0.00797288	0	0.000809142	0.00152196	0.00866652	0.00824962	0.0216583	0		0.157557	0.0498599	0	0.00358618	0.00821628	0.060146	0.0591254	0.156863	0	0.495353	0.491767
	55	0.0246188	0.0077013	0	0.00057215	0.00107619	0.00687862	0.00793798	0.0214922	0		0.153958	0.0481615	0	0.00253581	0.00580979	0.0477379	0.0568918	0.155659	0	0.470755	0.468219
	56	0.0240565	0.00743896	0	0.000404571	0.000760979	0.00545957	0.00763812	0.0213273	0		0.150442	0.0465209	0	0.00179309	0.00410814	0.0378896	0.0547427	0.154465	0	0.449961	0.448168
	57	0.0235071	0.00718557	0	0.000286075	0.000538093	0.00433326	0.00734958	0.0211637	0		0.147006	0.0449362	0	0.00126791	0.00290489	0.030073	0.0526747	0.15328	0	0.432143	0.430875
	58	0.0229702	0.0069408	0	0.000202285	0.000380489	0.00343931	0.00707194	0.0210013	0		0.143648	0.0434055	0	0.000896545	0.00205407	0.023869	0.0506849	0.152104	0	0.416662	0.415766
	59	0.0224455	0.00670437	0	0.000143037	0.000269047	0.00272978	0.00680479	0.0208402	0		0.140367	0.041927	0	0.000633953	0.00145245	0.0189448	0.0487702	0.150937	0	0.403033	0.402399
	60	0.0219329	0.00647599	0	0.000101143	0.000190245	0.00216663	0.00654773	0.0206803	0		0.137161	0.0404988	0	0.000448272	0.00102703	0.0150365	0.0469278	0.149779	0	0.390879	0.390431
	61	0.0214319	0.0062554	0	7.15187e-05	0.000134523	0.00171966	0.00630038	0.0205216	0		0.134029	0.0391193	0	0.000316976	0.000726223	0.0119345	0.0451551	0.14863	0	0.379911	0.379594
	62	0.0209424	0.00604232	0	5.05714e-05	9.51224e-05	0.00136489	0.00606238	0.0203642	0		0.130967	0.0377867	0	0.000224136	0.000513517	0.00947241	0.0434493	0.14749	0	0.369903	0.369679
	63	0.0204641	0.00583649	0	3.57594e-05	6.72617e-05	0.00108332	0.00583336	0.0202079	0		0.127976	0.0364996	0	0.000158488	0.000363112	0.00751825	0.0418079	0.146358	0	0.360682	0.360523
	64	0.0199967	0.00563768	0	2.52857e-05	4.75612e-05	0.000859828	0.005613	0.0200529	0		0.125053	0.0352563	0	0.000112068	0.000256759	0.00596724	0.0402286	0.145235	0	0.352109	0.351997
	65	0.01954	0.00544564	0	1.78797e-05	3.36308e-05	0.000682446	0.00540096	0.0198991	0		0.122197	0.0340553	0	7.92441e-05	0.000181556	0.0047362	0.0387089	0.144121	0	0.344079	0.344
	66	0.0190937	0.00526014	0	1.26428e-05	2.37806e-05	0.000541658	0.00519694	0.0197464	0		0.119406	0.0328953	0	5.6034e-05	0.000128379	0.00375913	0.0372466	0.143015	0	0.336507	0.336451
	67	0.0186576	0.00508096	0	8.93984e-06	1.68154e-05	0.000429914	0.00500062	0.0195949	0		0.116679	0.0317747	0	3.96221e-05	9.07779e-05	0.00298362	0.0358396	0.141918	0	0.329325	0.329285
	68	0.0182314	0.00490789	0	6.32142e-06	1.18903e-05	0.000341223	0.00481171	0.0194446	0		0.114014	0.0306924	0	2.8017e-05	6.41897e-05	0.0023681	0.0344857	0.140829	0	0.322481	0.322453
	69	0.017815	0.00474071	0	4.46992e-06	8.40771e-06	0.000270829	0.00462994	0.0192954	0		0.11141	0.0296469	0	1.9811e-05	4.5389e-05	0.00187956	0.033183	0.139749	0	0.315933	0.315913
	70	0.0174081	0.00457922	0	3.16071e-06	5.94515e-06	0.000214957	0.00445504	0.0191474	0		0.108865	0.028637	0	1.40085e-05	3.20948e-05	0.00149181	0.0319295	0.138677	0	0.309646	0.309632
	71	0.0170105	0.00442323	0	2.23496e-06	4.20385e-06	0.000170611	0.00428675	0.0190005	0		0.106379	0.0276615	0	9.90551e-06	2.26945e-05	0.00118405	0.0307233	0.137613	0	0.303593	0.303583
	72	0.016622	0.00427256	0	1.58036e-06	2.97257e-06	0.000135414	0.00412481	0.0188547	0		0.103949	0.0267192	0	7.00426e-06	1.60474e-05	0.000939782	0.0295627	0.136557	0	0.297751	0.297744
	73	0.0162424	0.00412702	0	1.11748e-06	2.10193e-06	0.000107478	0.00396899	0.01871	0		0.101575	0.0258091	0	4.95276e-06	1.13472e-05	0.000745905	0.0284459	0.135509	0	0.292101	0.292096
	74	0.0158714	0.00398644	0	7.90178e-07	1.48629e-06	8.53057e-05	0.00381906	0.0185665	0		0.0992547	0.0249299	0	3.50213e-06	8.02371e-06	0.000592025	0.0273713	0.13447	0	0.286629	0.286626
	75	0.0155089	0.00385065	0	5.5874e-07	1.05096e-06	6.77072e-05	0.00367479	0.018424	0		0.0969877	0.0240807	0	2.47638e-06	5.67362e-06	0.000469891	0.0263374	0.133438	0	0.281322	0.281319		Years 1-5	Years 5-10	Years 10-20	Years 20-50	Years 50-100
	76	0.0151547	0.00371948	0	3.95089e-07	7.43143e-07	5.37392e-05	0.00353597	0.0182827	0		0.0947725	0.0232605	0	1.75106e-06	4.01186e-06	0.000372953	0.0253424	0.132414	0	0.276168	0.276167		slope 1-5	slope 5-10	slope 10-20	slope 20-50	slope 50-100
	77	0.0148085	0.00359278	0	2.7937e-07	5.25482e-07	4.26529e-05	0.00340239	0.0181424	0		0.0926079	0.0224681	0	1.23819e-06	2.83681e-06	0.000296013	0.0243851	0.131398	0	0.27116	0.271158	1000 tC	-0.0377684	-0.0159751	-0.00812328	-0.00406956	-0.00190582
	78	0.0144703	0.0034704	0	1.97544e-07	3.71572e-07	3.38536e-05	0.00327386	0.0180032	0		0.0904927	0.0217028	0	8.75532e-07	2.00593e-06	0.000234945	0.0234639	0.13039	0	0.266288	0.266287	Mg C	-37.7684	-15.9751	-8.12328	-4.06956	-1.90582
	79	0.0141398	0.00335218	0	1.39685e-07	2.62741e-07	2.68696e-05	0.00315019	0.0178651	0		0.0884259	0.0209635	0	6.19095e-07	1.41841e-06	0.000186476	0.0225775	0.12939	0	0.261545	0.261545	Mg CO2	-138.484	-58.5755	-29.7854	-14.9217	-6.98801		decreasing by this much each year
	80	0.0138169	0.003238	0	9.87722e-08	1.85786e-07	2.13264e-05	0.00303119	0.017728	0		0.0864062	0.0202494	0	4.37766e-07	1.00296e-06	0.000148006	0.0217246	0.128397	0	0.256927	0.256927								Use these averages for calculating avoided emissions - FF
	81	0.0135013	0.0031277	0	6.98425e-08	1.3137e-07	1.69268e-05	0.00291668	0.017592	0		0.0844327	0.0195596	0	3.09547e-07	7.09203e-07	0.000117473	0.020904	0.127412	0	0.252427	0.252427	Yr	-2418.52
	82	0.0131929	0.00302116	0	4.93861e-08	9.28929e-08	1.34348e-05	0.0028065	0.0174571	0		0.0825043	0.0188934	0	2.18883e-07	5.01482e-07	9.32382e-05	0.0201143	0.126435	0	0.248041	0.24804
	83	0.0128916	0.00291825	0	3.49213e-08	6.56852e-08	1.06632e-05	0.00270048	0.0173231	0		0.0806199	0.0182498	0	1.54774e-07	3.54601e-07	7.40032e-05	0.0193545	0.125465	0	0.243763	0.243763
	84	0.0125971	0.00281884	0	2.46931e-08	4.64465e-08	8.4634e-06	0.00259847	0.0171902	0		0.0787785	0.0176281	0	1.09442e-07	2.50741e-07	5.87364e-05	0.0186233	0.124502	0	0.239591	0.239591
	85	0.0123094	0.00272282	0	1.74606e-08	3.28426e-08	6.7174e-06	0.00250031	0.0170583	0		0.0769792	0.0170277	0	7.73868e-08	1.77301e-07	4.66191e-05	0.0179198	0.123547	0	0.23552	0.23552																			Years 1-10	Years 10-50	Years 50-100
	86	0.0120283	0.00263007	0	1.23465e-08	2.32232e-08	5.33161e-06	0.00240586	0.0169275	0		0.075221	0.0164476	0	5.47208e-08	1.2537e-07	3.70016e-05	0.0172429	0.122599	0	0.231548	0.231548																			slope 1-10	slope 10-50	slope 50-100
	87	0.0117535	0.00254048	0	8.73031e-09	1.64213e-08	4.2317e-06	0.00231497	0.0167976	0		0.0735029	0.0158874	0	3.86934e-08	8.86503e-08	2.93682e-05	0.0165915	0.121658	0	0.22767	0.22767																	primary + recycled	1000 tC	-0.0120628	-0.00550391	-0.00302036
	88	0.0114851	0.00245394	0	6.17326e-09	1.16116e-08	3.3587e-06	0.00222752	0.0166687	0		0.0718241	0.0153462	0	2.73604e-08	6.26852e-08	2.33095e-05	0.0159647	0.120725	0	0.223883	0.223883																		Mg C	-12.0628	-5.50391	-3.02036
	89	0.0112228	0.00237035	0	4.36516e-09	8.21065e-09	2.6658e-06	0.00214337	0.0165409	0		0.0701837	0.0148234	0	1.93467e-08	4.43252e-08	1.85008e-05	0.0153616	0.119799	0	0.220186	0.220186																		Mg CO2	-44.2303	-20.181	-11.0746		decreasing by this much each year
	90	0.0109664	0.00228961	0	3.08663e-09	5.80581e-09	2.11585e-06	0.00206241	0.016414	0		0.0685807	0.0143185	0	1.36802e-08	3.13426e-08	1.46841e-05	0.0147813	0.11888	0	0.216575	0.216575
	91	0.010716	0.00221162	0	2.18258e-09	4.10533e-09	1.67935e-06	0.0019845	0.016288	0		0.0670143	0.0138308	0	9.67335e-09	2.21626e-08	1.16548e-05	0.014223	0.117968	0	0.213047	0.213047
	92	0.0104712	0.00213628	0	1.54332e-09	2.9029e-09	1.3329e-06	0.00190953	0.0161631	0		0.0654837	0.0133596	0	6.84009e-09	1.56713e-08	9.2504e-06	0.0136857	0.117063	0	0.209601	0.209601
	93	0.0102321	0.00206351	0	1.09129e-09	2.05266e-09	1.05792e-06	0.00183739	0.0160391	0		0.063988	0.0129045	0	4.83668e-09	1.10813e-08	7.34204e-06	0.0131687	0.116165	0	0.206233	0.206233
	94	0.00999835	0.00199322	0	7.71658e-10	1.45145e-09	8.39676e-07	0.00176798	0.015916	0		0.0625265	0.012465	0	3.42005e-09	7.83566e-09	5.82738e-06	0.0126712	0.115273	0	0.202942	0.202942
	95	0.00976999	0.00192532	0	5.45645e-10	1.02633e-09	6.66451e-07	0.0017012	0.0157939	0		0.0610984	0.0120404	0	2.41834e-09	5.54064e-09	4.6252e-06	0.0121925	0.114389	0	0.199725	0.199725
	96	0.00954685	0.00185974	0	3.85829e-10	7.25726e-10	5.28962e-07	0.00163693	0.0156727	0		0.0597029	0.0116302	0	1.71002e-09	3.91783e-09	3.67102e-06	0.011732	0.113511	0	0.19658	0.19658
	97	0.00932879	0.00179639	0	2.72822e-10	5.13166e-10	4.19838e-07	0.0015751	0.0155525	0		0.0583393	0.0112341	0	1.20917e-09	2.77032e-09	2.91369e-06	0.0112888	0.11264	0	0.193506	0.193506
	98	0.00911572	0.0017352	0	1.92914e-10	3.62863e-10	3.33225e-07	0.00151559	0.0154332	0		0.0570068	0.0108514	0	8.55012e-10	1.95891e-09	2.3126e-06	0.0108623	0.111776	0	0.190499	0.190499
	99	0.00890752	0.00167609	0	1.36411e-10	2.56583e-10	2.64481e-07	0.00145834	0.0153148	0		0.0557048	0.0104817	0	6.04585e-10	1.38516e-09	1.83551e-06	0.010452	0.110919	0	0.187559	0.187559
	100	0.0369418	0.0109776	0	0.00330732	0.00622091	0.0223158	0.011237	0.0380215	0		0.0544325	0.0101247	0	4.27506e-10	9.79457e-10	1.45685e-06	0.0100572	0.110068	0	0.184684	0.184684
	101											0.0531893	0.00977982	0	3.02292e-10	6.92581e-10	1.1563e-06	0.00967723	0.109223	0	0.181871	0.181871
	102											0.0519744	0.00944668	0	2.13753e-10	4.89728e-10	9.17756e-07	0.00931166	0.108385	0	0.179119	0.179119
	103											0.0507873	0.00912489	0	1.51146e-10	3.4629e-10	7.28423e-07	0.0089599	0.107554	0	0.176427	0.176427
	104											0.0496273	0.00881407	0	1.06876e-10	2.44864e-10	5.7815e-07	0.00862143	0.106729	0	0.173792	0.173792
	105											0.0484939	0.00851383	0	7.55731e-11	1.73145e-10	4.58878e-07	0.00829575	0.10591	0	0.171214	0.171214
	106											0.0473863	0.00822381	0	5.34382e-11	1.22432e-10	3.64212e-07	0.00798237	0.105097	0	0.16869	0.16869
	107											0.0463039	0.00794368	0	3.77865e-11	8.65726e-11	2.89075e-07	0.00768082	0.104291	0	0.16622	0.16622
	108											0.0452464	0.00767309	0	2.67191e-11	6.12161e-11	2.29439e-07	0.00739067	0.103491	0	0.163801	0.163801
	109											0.0442129	0.00741172	0	1.88933e-11	4.32863e-11	1.82106e-07	0.00711148	0.102697	0	0.161433	0.161433
	110											0.0432031	0.00715925	0	1.33596e-11	3.0608e-11	1.44537e-07	0.00684283	0.101909	0	0.159114	0.159114
	111											0.0422164	0.00691538	0	9.44663e-12	2.16431e-11	1.14719e-07	0.00658434	0.101127	0	0.156843	0.156843
	112											0.0412521	0.00667981	0	6.67978e-12	1.5304e-11	9.10529e-08	0.00633561	0.100351	0	0.154619	0.154619
	113											0.0403099	0.00645227	0	4.72332e-12	1.08216e-11	7.22687e-08	0.00609627	0.0995813	0	0.15244	0.15244
	114											0.0393892	0.00623249	0	3.33989e-12	7.65201e-12	5.73597e-08	0.00586598	0.0988173	0	0.150305	0.150305
	115											0.0384896	0.00602018	0	2.36166e-12	5.41079e-12	4.55264e-08	0.00564438	0.0980592	0	0.148213	0.148213
	116											0.0376105	0.00581511	0	1.66994e-12	3.826e-12	3.61344e-08	0.00543116	0.0973069	0	0.146164	0.146164
	117											0.0367515	0.00561703	0	1.18083e-12	2.70539e-12	2.86799e-08	0.00522599	0.0965604	0	0.144155	0.144155
	118											0.0359121	0.00542569	0	8.34972e-13	1.913e-12	2.27632e-08	0.00502858	0.0958195	0	0.142186	0.142186
	119											0.0350918	0.00524087	0	5.90415e-13	1.3527e-12	1.80672e-08	0.00483861	0.0950844	0	0.140256	0.140256
	120											0.0342903	0.00506235	0	4.17486e-13	9.56501e-13	1.43399e-08	0.00465583	0.0943549	0	0.138363	0.138363
	121											0.0335071	0.00488991	0	2.95207e-13	6.76348e-13	1.13816e-08	0.00447995	0.093631	0	0.136508	0.136508
	122											0.0327418	0.00472334	0	2.08743e-13	4.7825e-13	9.03359e-09	0.00431072	0.0929127	0	0.134689	0.134689
	123											0.031994	0.00456245	0	1.47604e-13	3.38174e-13	7.16997e-09	0.00414787	0.0921998	0	0.132904	0.132904
	124											0.0312633	0.00440703	0	1.04372e-13	2.39125e-13	5.69081e-09	0.00399118	0.0914925	0	0.131154	0.131154
	125											0.0305492	0.00425691	0	7.38018e-14	1.69087e-13	4.5168e-09	0.00384041	0.0907905	0	0.129437	0.129437
	126											0.0298515	0.00411191	0	5.21858e-14	1.19563e-13	3.58498e-09	0.00369534	0.090094	0	0.127753	0.127753
	127											0.0291697	0.00397184	0	3.69009e-14	8.45435e-14	2.8454e-09	0.00355574	0.0894028	0	0.1261	0.1261
	128											0.0285034	0.00383654	0	2.60929e-14	5.97813e-14	2.2584e-09	0.00342142	0.0887169	0	0.124478	0.124478
	129											0.0278524	0.00370586	0	1.84505e-14	4.22718e-14	1.79249e-09	0.00329217	0.0880362	0	0.122887	0.122887
	130											0.0272163	0.00357962	0	1.30464e-14	2.98907e-14	1.4227e-09	0.0031678	0.0873608	0	0.121325	0.121325
	131											0.0265946	0.00345769	0	9.22523e-15	2.11359e-14	1.1292e-09	0.00304814	0.0866906	0	0.119791	0.119791
	132											0.0259872	0.00333991	0	6.52322e-15	1.49453e-14	8.96246e-10	0.00293299	0.0860255	0	0.118286	0.118286
	133											0.0253937	0.00322614	0	4.61261e-15	1.05679e-14	7.11351e-10	0.00282219	0.0853655	0	0.116808	0.116808
	134											0.0248137	0.00311624	0	3.26161e-15	7.47266e-15	5.64599e-10	0.00271558	0.0847106	0	0.115356	0.115356
	135											0.0242469	0.00301009	0	2.30631e-15	5.28397e-15	4.48123e-10	0.002613	0.0840607	0	0.113931	0.113931
	136											0.0236931	0.00290756	0	1.63081e-15	3.73633e-15	3.55675e-10	0.00251429	0.0834158	0	0.112531	0.112531
	137											0.023152	0.00280852	0	1.15315e-15	2.64199e-15	2.823e-10	0.00241931	0.0827758	0	0.111156	0.111156
	138											0.0226232	0.00271285	0	8.15403e-16	1.86817e-15	2.24061e-10	0.00232792	0.0821407	0	0.109805	0.109805
	139											0.0221065	0.00262044	0	5.76577e-16	1.32099e-15	1.77838e-10	0.00223998	0.0815105	0	0.108477	0.108477
	140											0.0216016	0.00253118	0	4.07701e-16	9.34083e-16	1.4115e-10	0.00215536	0.0808852	0	0.107173	0.107173
	141											0.0211082	0.00244495	0	2.88288e-16	6.60496e-16	1.12031e-10	0.00207394	0.0802646	0	0.105892	0.105892
	142											0.0206261	0.00236167	0	2.03851e-16	4.67041e-16	8.89188e-11	0.00199559	0.0796488	0	0.104632	0.104632
	143											0.020155	0.00228122	0	1.44144e-16	3.30248e-16	7.05749e-11	0.00192021	0.0790378	0	0.103394	0.103394
	144											0.0196946	0.00220352	0	1.01925e-16	2.33521e-16	5.60154e-11	0.00184767	0.0784314	0	0.102177	0.102177
	145											0.0192448	0.00212846	0	7.20721e-17	1.65124e-16	4.44594e-11	0.00177787	0.0778297	0	0.100981	0.100981
	146											0.0188052	0.00205595	0	5.09627e-17	1.1676e-16	3.52875e-11	0.00171071	0.0772325	0	0.0998044	0.0998044
	147											0.0183757	0.00198592	0	3.6036e-17	8.2562e-17	2.80077e-11	0.00164608	0.07664	0	0.0986477	0.0986477
	148											0.017956	0.00191827	0	2.54813e-17	5.83802e-17	2.22297e-11	0.0015839	0.076052	0	0.0975102	0.0975102
	149											0.0175459	0.00185293	0	1.8018e-17	4.1281e-17	1.76437e-11	0.00152407	0.0754685	0	0.0963915	0.0963915
	150											0.0171452	0.00178981	0	1.27407e-17	2.91901e-17	1.40038e-11	0.00146649	0.0748895	0	0.095291	0.095291	this calc shows that paper, biomass and mulch make almost no difference to the total
	151
	152																						-0.00564306	-0.00549961
																							-20.6912	-20.1652	These show annualised average HWP lost (compared to above, this level of accuracy isn't good enough for calculating FF avoided emissions)
		Unthinned										Thinned
		Total C stored in HWP (wood) at yr 100	125715	kg C								Total C stored in HWP (wood) at yr 150	95291	kg C
		Total C stored in HWP (paper) at yr 100	3307.32	kg C								Total C stored in HWP (paper) at yr 150	1.27407e-11	kg C
		Total C stored in wood products (not incl biomass or mulch) (at time of harvest)	204543	kg C								Total C stored in wood products (not incl biomass or mulch) (at time of harvest)	674420	kg C
		Total C stored in paper products (at time of harvest)	7743.22	kg C								Total C stored in paper products (at time of harvest)	16973.8	kg C
		Total C emitted from HWP pool (wood) by yr 100	78828.7	kg C								Total C emitted from HWP pool (wood) by yr 100	579129	kg C
		Total C emitted from HWP pool (paper) by yr 100	4435.91	kg C								Total C emitted from HWP pool (paper) by yr 100	16973.8	kg C
		Amount to wood panel production (secondary use) by yr 100	50304.6	kg C	119.112	m3 particle board produced						Amount to wood panel production (secondary use) by yr 100	369572	kg C	875.076	m3 particle board produced
					125887	kg recycled wood to particle board production (20% moisture)									924855	kg recycled wood to particle board production (20% moisture)
		Amount to biomass (electricity) (secondary use) by yr 100	12564.9	kg C	46071.2	kg CO2eq						Amount to biomass (electricity) (secondary use) by yr 100	92310.1	kg C	338470	kg CO2eq
		Amount to biomass (electricity) (secondary use) by yr 100	25154.9	kg (dry)								Amount to biomass (electricity) (secondary use) by yr 100	184805	kg (dry)
		Electricity from secondary use wood chips to biomass (by yr 100)	184486	kWh								Heat from secondary use wood chips to biomass (by yr 100)	1.35536e+06	kWh
		Amount to paper production (secondary use) by yr 100	4432.14	kg C	3042.23	kg paper collected to recycled paper production						Amount to paper production (secondary use) by yr 100	16959.4	kg C	11640.9	kg paper collected to recycled paper production
					3407.29	kg paper collected to paperboard production									13037.8	kg paper collected to paperboard production
		Amount wood to incineration (end use) by yr 100	15375.8	kg C	56377.9	kg CO2eq						Amount wood to incineration (end use) by yr 100	112961	kg C	414191	kg CO2eq
			38478	kg (20% moisture)	440958	MJ (produced if burned in woodchip boiler)							282686	kg (20% moisture)	3.23958e+06	MJ (produced if burned in woodchip boiler)
		Amount paper to incineration (end use) by yr 100	0.342066	kg C	1.25424	kg CO2eq						Amount paper to incineration (end use) by yr 100	1.3089	kg C	4.79929	kg CO2eq
			0.469588	kg									1.79685	kg
		Amount wood C to landfill (end use) by yr 100	583.379	kg C	2139.06	kg CO2eq						Amount wood C to landfill (end use) by yr 100	4285.9	kg C	15715	kg CO2eq
		Amount wood to landfill (end use) by yr 100	1459.91	kg								Amount wood to landfill (end use) by yr 100	10725.5	kg
		Amount paper C to landfill (end use) by yr 100	3.42133	kg C	12.5449	kg CO2eq						Amount paper C to landfill (end use) by yr 100	13.0915	kg C	48.0023	kg CO2eq
		Amount paper to landfill (end use) by yr 100	4.69681	kg								Amount paper to landfill (end use) by yr 100	17.9721	kg
Decay Calculations - recycled HWPs (one recycle):
		Unthinned				Thinned
	yr	particle board	inflow	paper and paperboard	inflow	particle board	inflow	paper and paperboard	inflow	Total		Total primary+recycled
	0									0		0
	1									0		0
	2									0		0
	3									0		0
	4									0		0
	5									0		0
	6									0		0
	7									0		0
	8									0		0
	9									0		0
	10									0		0
	11									0		0
	12									0		0
	13									0		0
	14									0		0
	15									0		0
	16									0		0
	17									0		0
	18									0		0
	19									0		0
	20									0		0
	21									0		0
	22					0	0	0	0	0		0
	23					0	0	0	0	0		0
	24					0	0	0	0	0		0
	25					0	0	0	0	0		0
	26					0	0	0	0	0		0
	27					0	0	0	0	0		0
	28					0	0	0	0	0		0
	29					0	0	0	0	0		0
	30					0	0	0	0	0		0
	31					0	0	0	0	0		0
	32					0	0	0	0	0		0
	33					0	0	0	0	0		0
	34					0	0	0	0	0		0
	35					0	0	0	0	0		0
	36					0	0	0	0	0		0
	37					0	0	0	0	0		0
	38					0	0	0	0	0		0
	39					0	0	0	0	0		0
	40					0	0	0	0	0		0
	41					0	0	0	0	0		0
	42					0	0	0	0	0		0
	43					0	0	0	0	0		0
	44					0	0	0	0	0		0
	45					0	0	0	0	0		0
	46					0	0	0	0	0		0
	47					0	0	0	0	0		0
	48					0	0	0	0	0		0
	49					0	0	0	0	0		0
	50					0	0	0	0	0		0.659597
	51	0.00676098	0.00683939	0.000800459	0.000947165	0.0454272	0.045954	0.000718856	0.000850605	0.0461461		0.650904
	52	0.0105648	0.00400412	0.00113202	0.000669746	0.0703188	0.0262298	0.00101662	0.000601468	0.0713354		0.63202
	53	0.0135589	0.0032729	0.00120069	0.000473582	0.0899928	0.0215269	0.00107828	0.000425302	0.0910711		0.615922
	54	0.0159267	0.00270857	0.00113202	0.000334873	0.105608	0.0178756	0.00101662	0.000300734	0.106625		0.601978
	55	0.0178078	0.00227086	0.00100057	0.000236791	0.118051	0.0150276	0.000898569	0.000212651	0.11895		0.589704
	56	0.0193084	0.00192955	0.000849015	0.000167437	0.128003	0.0127951	0.000762461	0.000150367	0.128766		0.578727
	57	0.0205103	0.00166188	0.000700402	0.000118396	0.135989	0.011036	0.000628999	0.000106326	0.136618		0.568761
	58	0.0214758	0.00145066	0.00056601	8.37183e-05	0.142415	0.00964183	0.000508308	7.51835e-05	0.142923		0.559585
	59	0.0222535	0.00128288	0.000450258	5.91978e-05	0.147594	0.0085301	0.000404356	5.31628e-05	0.147998		0.551031
	60	0.0228807	0.00114863	0.000353756	4.18592e-05	0.151773	0.00763755	0.000317692	3.75918e-05	0.152091		0.54297
	61	0.0233865	0.00104035	0.000275158	2.95989e-05	0.155143	0.00691565	0.000247107	2.65814e-05	0.15539		0.535301
	62	0.0237937	0.00095225	0.000212254	2.09296e-05	0.157854	0.00632703	0.000190615	1.87959e-05	0.158045		0.527948
	63	0.0241201	0.000879905	0.000162593	1.47994e-05	0.160024	0.00584285	0.000146018	1.32907e-05	0.16017		0.520852
	64	0.0243797	0.000819897	0.000123815	1.04648e-05	0.161748	0.00544079	0.000111192	9.39794e-06	0.161859		0.513968
	65	0.0245836	0.000769587	9.38038e-05	7.39972e-06	0.163099	0.00510352	8.42409e-05	6.64535e-06	0.163183		0.507262
	66	0.0247407	0.000726934	7.07513e-05	5.23239e-06	0.164136	0.00481757	6.35385e-05	4.69897e-06	0.164199		0.500706
	67	0.0248581	0.000690355	5.31555e-05	3.69986e-06	0.164907	0.00457244	4.77365e-05	3.32267e-06	0.164955		0.49428
	68	0.0249414	0.000658617	3.97976e-05	2.6162e-06	0.16545	0.00435991	3.57404e-05	2.34949e-06	0.165486		0.487967
	69	0.0249952	0.000630756	2.97045e-05	1.84993e-06	0.165797	0.00417357	2.66763e-05	1.66134e-06	0.165824		0.481757
	70	0.0250234	0.000606022	2.21098e-05	1.3081e-06	0.165973	0.00400837	1.98558e-05	1.17474e-06	0.165993		0.475639
	71	0.025029	0.000583824	1.64157e-05	9.24965e-07	0.166144	0.00400837	1.75076e-05	4.103e-06	0.166162		0.469755
	72	0.0250146	0.000563699	1.21604e-05	6.54049e-07	0.166033	0.00372632	1.28762e-05	5.87371e-07	0.166046		0.463797
	73	0.0249823	0.000545279	8.98953e-06	4.62483e-07	0.165804	0.00360387	9.45583e-06	4.15334e-07	0.165813		0.457914
	74	0.0249339	0.000528277	6.63293e-06	3.27025e-07	0.165468	0.00349103	6.93448e-06	2.93686e-07	0.165475		0.452104
	75	0.024871	0.000512463	4.88562e-06	2.31241e-07	0.165036	0.00338623	5.07892e-06	2.07667e-07	0.165041		0.446363
	76	0.0247949	0.000497654	3.59284e-06	1.63512e-07	0.164517	0.00328823	3.71544e-06	1.46843e-07	0.164521		0.440689
	77	0.0247068	0.000483704	2.63823e-06	1.15621e-07	0.163919	0.00319605	2.71496e-06	1.03834e-07	0.163921		0.435081
	78	0.0246076	0.000470498	1.93461e-06	8.17562e-08	0.163248	0.00310887	1.98182e-06	7.34214e-08	0.16325		0.429538
	79	0.0244982	0.000457941	1.41683e-06	5.78103e-08	0.162511	0.00302607	1.44523e-06	5.19168e-08	0.162512		0.424058
	80	0.0243795	0.000445957	1.0364e-06	4.08781e-08	0.161712	0.00294712	1.05296e-06	3.67107e-08	0.161713		0.41864
	81	0.0242522	0.000434483	7.57271e-07	2.89052e-08	0.160858	0.00287159	7.66491e-07	2.59584e-08	0.160858		0.413285
	82	0.0241169	0.00042347	5.52744e-07	2.0439e-08	0.159951	0.00279915	5.57503e-07	1.83554e-08	0.159951		0.407992
	83	0.0239742	0.000412876	4.03063e-07	1.44526e-08	0.158996	0.00272951	4.05183e-07	1.29792e-08	0.158996		0.402759
	84	0.0238247	0.000402665	2.93645e-07	1.02195e-08	0.157996	0.00266243	2.94264e-07	9.17768e-09	0.157996		0.397587
	85	0.0236688	0.00039281	2.13746e-07	7.22629e-09	0.156955	0.00259771	2.1356e-07	6.4896e-09	0.156956		0.392476
	86	0.0235071	0.000383284	1.55459e-07	5.10976e-09	0.155877	0.00253518	1.54888e-07	4.58884e-09	0.155877		0.387424
	87	0.02334	0.000374068	1.1298e-07	3.61315e-09	0.154763	0.00247471	1.12265e-07	3.2448e-09	0.154763		0.382432
	88	0.0231679	0.000365144	8.2048e-08	2.55488e-09	0.153616	0.00241617	8.13222e-08	2.29442e-09	0.153616		0.3775
	89	0.0229911	0.000356495	5.95434e-08	1.80657e-09	0.15244	0.00235946	5.88746e-08	1.6224e-09	0.15244		0.372626
	90	0.0228101	0.000348108	4.31832e-08	1.27744e-09	0.151236	0.00230448	4.26001e-08	1.14721e-09	0.151237		0.367811
	91	0.0226252	0.000339971	3.12985e-08	9.03287e-10	0.150008	0.00225114	3.08084e-08	8.112e-10	0.150008		0.363055
	92	0.0224367	0.000332072	2.26712e-08	6.3872e-10	0.148756	0.00219938	2.22696e-08	5.73605e-10	0.148756		0.358356
	93	0.0222449	0.000324402	1.64126e-08	4.51643e-10	0.147482	0.00214913	1.60897e-08	4.056e-10	0.147482		0.353716
	94	0.0220502	0.000316952	1.18754e-08	3.1936e-10	0.14619	0.00210033	1.16195e-08	2.86802e-10	0.14619		0.349132
	95	0.0218527	0.000309713	8.588e-09	2.25822e-10	0.144881	0.00205291	8.38765e-09	2.028e-10	0.144881		0.344606
	96	0.0216528	0.000302678	6.20758e-09	1.5968e-10	0.143555	0.00200684	6.05215e-09	1.43401e-10	0.143555		0.340135
	97	0.0214507	0.000295839	4.48484e-09	1.12911e-10	0.142216	0.00196206	4.36521e-09	1.014e-10	0.142216		0.335722
	98	0.0212466	0.00028919	3.23874e-09	7.984e-11	0.140864	0.00191852	3.14727e-09	7.17006e-11	0.140864		0.331364
	99	0.0210409	0.000282725	2.33784e-09	5.64554e-11	0.139502	0.00187619	2.2683e-09	5.07e-11	0.139502		0.327061
	100	0.0227422	0.00220719	1.70082e-09	5.64554e-11	0.13813	0.00183503	1.63423e-09	3.58503e-11	0.13813		0.322813
	101					0.136749	0.00179499	1.177e-09	2.535e-11	0.136749		0.31862
	102					0.135362	0.00175604	8.47412e-10	1.79252e-11	0.135362		0.314481
	103					0.133968	0.00171814	6.09922e-10	1.2675e-11	0.133968		0.310395
	104					0.132571	0.00168127	4.38855e-10	8.96258e-12	0.132571		0.306363
	105					0.131169	0.00164538	3.15673e-10	6.3375e-12	0.131169		0.302383
	106					0.129765	0.00161046	2.27002e-10	4.48129e-12	0.129765		0.298455
	107					0.12836	0.00157647	1.63192e-10	3.16875e-12	0.12836		0.294579
	108					0.126954	0.00154338	1.17288e-10	2.24064e-12	0.126954		0.290755
	109					0.125548	0.00151116	8.42741e-11	1.58437e-12	0.125548		0.286981
	110					0.124143	0.00147979	6.05376e-11	1.12032e-12	0.124143		0.283258
	111					0.12274	0.00144925	4.3476e-11	7.92187e-13	0.12274		0.279584
	112					0.12134	0.0014195	3.12156e-11	5.60161e-13	0.12134		0.275959
	113					0.119943	0.00139053	2.24075e-11	3.96094e-13	0.119943		0.272383
	114					0.118551	0.00136231	1.60812e-11	2.80081e-13	0.118551		0.268856
	115					0.117162	0.00133482	1.15385e-11	1.98047e-13	0.117162		0.265376
	116					0.115779	0.00130803	8.2773e-12	1.4004e-13	0.115779		0.261943
	117					0.114402	0.00128194	5.93662e-12	9.90234e-14	0.114402		0.258557
	118					0.113031	0.00125651	4.257e-12	7.00201e-14	0.113031		0.255217
	119					0.111667	0.00123173	3.052e-12	4.95117e-14	0.111667		0.251923
	120					0.110311	0.00120758	2.18767e-12	3.50101e-14	0.110311		0.248674
	121					0.108962	0.00118403	1.56784e-12	2.47559e-14	0.108962		0.24547
	122					0.107621	0.00116109	1.12342e-12	1.7505e-14	0.107621		0.242309
	123					0.106288	0.00113871	8.04842e-13	1.23779e-14	0.106288		0.239193
	124					0.104965	0.0011169	5.76506e-13	8.75252e-15	0.104965		0.236119
	125					0.10365	0.00109563	4.12882e-13	6.18896e-15	0.10365		0.233088
	126					0.102346	0.00107489	2.9565e-13	4.37626e-15	0.102346		0.230098
	127					0.101051	0.00105466	2.11671e-13	3.09448e-15	0.101051		0.227151
	128					0.0997657	0.00103493	1.51523e-13	2.18813e-15	0.0997657		0.224244
	129					0.0984911	0.00101568	1.08451e-13	1.54724e-15	0.0984911		0.221378
	130					0.097227	0.000996901	7.76109e-14	1.09406e-15	0.097227		0.218552
	131					0.0959737	0.00097858	5.5533e-14	7.73621e-16	0.0959737		0.215765
	132					0.0947314	0.000960702	3.973e-14	5.47032e-16	0.0947314		0.213017
	133					0.0935001	0.000943256	2.84203e-14	3.8681e-16	0.0935001		0.210308
	134					0.0922802	0.00092623	2.03273e-14	2.73516e-16	0.0922802		0.207636
	135					0.0910717	0.000909611	1.4537e-14	1.93405e-16	0.0910717		0.205002
	136					0.0898748	0.000893388	1.03948e-14	1.36758e-16	0.0898748		0.202405
	137					0.0886895	0.00087755	7.43197e-15	9.67026e-17	0.0886895		0.199845
	138					0.087516	0.000862087	5.31298e-15	6.8379e-17	0.087516		0.197321
	139					0.0863545	0.000846987	3.79771e-15	4.83513e-17	0.0863545		0.194832
	140					0.0852048	0.000832242	2.71428e-15	3.41895e-17	0.0852048		0.192378
	141					0.0840672	0.000817841	1.93972e-15	2.41756e-17	0.0840672		0.189959
	142					0.0829417	0.000803774	1.38603e-15	1.70948e-17	0.0829417		0.187574
	143					0.0818282	0.000790033	9.90289e-16	1.20878e-17	0.0818282		0.185222
	144					0.080727	0.000776609	7.07464e-16	8.54738e-18	0.080727		0.182904
	145					0.0796379	0.000763493	5.0536e-16	6.04391e-18	0.0796379		0.180619
	146					0.0785611	0.000750676	3.60955e-16	4.27369e-18	0.0785611		0.178366
	147					0.0774964	0.000738151	2.57788e-16	3.02196e-18	0.0774964		0.176144
	148					0.076444	0.000725909	1.84089e-16	2.13684e-18	0.076444		0.173954
	149					0.0754038	0.000713944	1.31448e-16	1.51098e-18	0.0754038		0.171795
	150					0.0743757	0.000702247	9.38506e-17	1.06842e-18	0.0743757		0.169667
		Unthinned							Thinned
		Total C stored in secondary use HWP (wood panels) at yr 100	22742.2	kg C					Total C stored in secondary use HWP (wood panels) at yr 150	74375.7	kg C
		Total C stored in secondary use HWP ( paper) at yr 100	0.00170082	kg C					Total C stored in secondary use HWP ( paper) at yr 150	9.38506e-11	kg C		Unthinned	Thinned
		Total C entering recycled HWP (panel production)	48327.5	kg C					Total C entering recycled HWP (panel production)	364746	kg C		114.43	863.649	m3 particle board produced
													120940	912778	kg recycled wood to particle board production (20% MC)
		Total C entering recycled HWP (paper production)	3233.82	kg C					Total C entering recycled HWP (paper production)	2907.42	kg C		2219.7	1995.65	kg paper collected to recycled paper
		Total C emitted from secondary use HWP (wood panels) by yr 100	25585.4	kg C					Total C emitted from secondary use HWP (wood panels) by yr 150	290371	kg C		2486.06	2235.13	kg paper collected to paperboard production
		Total C emitted from secondary use HWP (paper) by yr 100	3233.82	kg C					Total C emitted from secondary use HWP (paper) by yr 150	2907.42
		Amount to biomass (tertiary) by yr 100	20405.5	kg C					Amount to biomass (tertiary) by yr 150	231584
		Amount to biomass (tertiary) by yr 100	74820.2	kg CO2eq					Amount to biomass (tertiary) by yr 150	849141	kg CO2eq
		Mass of wood chips to biomass (electricity) (by yr 100)	40851.9	kg (dry)					Mass of wood chips to biomass (electricity) (by yr 150)	463631	kg (dry)
		Electricity from wood chips to biomass (by yr 100)	299608	kWh					Electricity from wood chips to biomass (by yr 150)	3.40027e+06	kWh
		Total wood C going to SWDS - incineration	4990.52	kg C					Total wood C going to SWDS - incineration	56637.8	kg C
		Total wood going to SWDS - incineration	12488.8	kg (20% moisture)					Total wood going to SWDS - incineration	141736	kg (20% moisture)
		Total wood C going to SWDS - landfill	189.347	kg C					Total wood C going to SWDS - landfill	2148.92	kg C
		Total wood going to SWDS - landfill	473.841	kg (20% moisture)					Total wood going to SWDS - landfill	5377.67	kg (20% moisture)
		Total paper C going to SWDS - incineration	0.249369	kg C					Total paper C going to SWDS - incineration	0.224199	kg C
		Total paper going to SWDS - incineration	0.342334	kg					Total paper going to SWDS - incineration	0.307781	kg
		Total paper C going to SWDS - landfill	3233.57	kg C					Total paper C going to SWDS - landfill	2907.19	kg C
		Total paper going to SWDS - landfill	4439.05	kg					Total paper going to SWDS - landfill	3991	kg
		Total biogenic C emitted from incineration (panels and paper)	4990.76	kg C	18299.5	kg CO2eq			Total biogenic C emitted from incineration (panels and paper)	56638	kg C	207673	kg CO2eq
		Total to landfill	3422.92	kg C					Total to landfill	5056.11	kg C
		Total to landfill	12550.7	kg CO2eq					Total to landfill	18539.1	kg CO2eq
Calculation of landfill emissions (IPCC First Order Decay (FOD) method:
methane generation rate, k	0.03
half life, t1/2	23
Methane correction factor (MCF)	0.5
Methane to CO2 eq conversion factor	25
Primary product wastes:		Unthinned							Thinned
		Gg C							Gg C
	yr	DDOCmd (wood)	DDOCmd (paper)	DDOCmd (total)	DDOCma	DDOCm decomp			DDOCmd (wood)	DDOCmd (paper)	DDOCmd (total)	DDOCma	DDOCma	DDOCm decomp
	0
	1
	2
	3
	4
	5
	6
	7
	8
	9
	10
	11
	12
	13
	14
	15
	16
	17
	18
	19
	20
	21
	22								0	0	0	0	0
	23								0	0	0	0	0
	24								0	0	0	0	0
	25								0	0	0	0	0
	26								0	0	0	0	0
	27								0	0	0	0	0
	28								0	0	0	0	0
	29								0	0	0	0	0
	30								0	0	0	0	0
	31								0	0	0	0	0
	32								0	0	0	0	0
	33								0	0	0	0	0
	34								0	0	0	0	0
	35								0	0	0	0	0
	36								0	0	0	0	0
	37								0	0	0	0	0
	38								0	0	0	0	0
	39								0	0	0	0	0
	40								0	0	0	0	0
	41								0	0	0	0	0
	42								0	0	0	0	0
	43								0	0	0	0	0
	44								0	0	0	0	0
	45								0	0	0	0	0
	46								0	0	0	0	0
	47								0	0	0	0	0
	48								0	0	0	0	0
	49								0	0	0	0	0
	50					0			0	0	0	0	0
	51	5.74755e-05	7.3115e-07	5.82066e-05	5.82066e-05	0			0.000374744	3.24051e-06	0.000377985	0.000377985	0
	52	4.64355e-05	5.17001e-07	4.69525e-05	0.000103439	1.72027e-06			0.000304185	2.29139e-06	0.000306477	0.00067329	1.11711e-05
	53	3.79556e-05	3.65575e-07	3.83211e-05	8.3886e-05	3.05708e-06			0.000249646	1.62026e-06	0.000251266	0.000548685	1.98987e-05
	54	3.14111e-05	2.58501e-07	3.16696e-05	6.88582e-05	2.47921e-06			0.000207302	1.14569e-06	0.000208448	0.000452288	1.62161e-05
	55	2.6335e-05	1.82788e-07	2.65178e-05	5.72514e-05	2.03507e-06			0.000174274	8.10128e-07	0.000175084	0.000377371	1.33671e-05
	56	2.23768e-05	1.2925e-07	2.25061e-05	4.82401e-05	1.69203e-06			0.000148384	5.72847e-07	0.000148957	0.000318866	1.1153e-05
	57	1.92727e-05	9.13938e-08	1.93641e-05	4.1205e-05	1.42571e-06			0.000127983	4.05064e-07	0.000128388	0.000272943	9.42393e-06
	58	1.68233e-05	6.46252e-08	1.68879e-05	3.56797e-05	1.21779e-06			0.000111816	2.86424e-07	0.000112102	0.000236696	8.06669e-06
	59	1.48775e-05	4.56969e-08	1.49232e-05	3.1312e-05	1.05449e-06			9.8923e-05	2.02532e-07	9.91255e-05	0.000207914	6.99543e-06
	60	1.33206e-05	3.23126e-08	1.33529e-05	2.78351e-05	9.25409e-07			8.85722e-05	1.43212e-07	8.87154e-05	0.000184911	6.1448e-06
	61	1.20648e-05	2.28484e-08	1.20877e-05	2.50459e-05	8.2265e-07			8.02003e-05	1.01266e-07	8.03016e-05	0.000166395	5.46495e-06
	62	1.10432e-05	1.61563e-08	1.10593e-05	2.27897e-05	7.40219e-07			7.33742e-05	7.16059e-08	7.34458e-05	0.000151374	4.91772e-06
	63	1.02042e-05	1.14242e-08	1.02156e-05	2.09481e-05	6.73539e-07			6.77592e-05	5.0633e-08	6.78098e-05	0.000139085	4.47378e-06
	64	9.50829e-06	8.07814e-09	9.51636e-06	1.94301e-05	6.1911e-07			6.30965e-05	3.5803e-08	6.31323e-05	0.000128938	4.11058e-06
	65	8.92484e-06	5.71211e-09	8.93056e-06	1.81657e-05	5.74245e-07			5.91852e-05	2.53165e-08	5.92105e-05	0.000120477	3.81069e-06
	66	8.43021e-06	4.03907e-09	8.43425e-06	1.71009e-05	5.36877e-07			5.5869e-05	1.79015e-08	5.58869e-05	0.000113347	3.56063e-06
	67	8.006e-06	2.85606e-09	8.00886e-06	1.61938e-05	5.05407e-07			5.30262e-05	1.26583e-08	5.30389e-05	0.000107274	3.34992e-06
	68	7.63793e-06	2.01954e-09	7.63995e-06	1.54121e-05	4.786e-07			5.05616e-05	8.95074e-09	5.05706e-05	0.000102042	3.17043e-06
	69	7.31484e-06	1.42803e-09	7.31627e-06	1.47304e-05	4.55497e-07			4.84006e-05	6.32913e-09	4.8407e-05	9.7483e-05	3.0158e-06
	70	7.028e-06	1.00977e-09	7.02901e-06	1.4129e-05	4.3535e-07			4.64847e-05	4.47537e-09	4.64892e-05	9.34655e-05	2.88106e-06
	71	6.77057e-06	7.14014e-10	6.77129e-06	1.35926e-05	4.17576e-07			4.64847e-05	4.47537e-09	4.64892e-05	9.16045e-05	2.76232e-06
	72	6.53717e-06	5.04884e-10	6.53768e-06	1.31088e-05	4.01721e-07			4.32138e-05	2.23768e-09	4.32161e-05	8.83313e-05	2.70732e-06
	73	6.32357e-06	3.57007e-10	6.32392e-06	1.26684e-05	3.87425e-07			4.17939e-05	1.58228e-09	4.17955e-05	8.37343e-05	2.61059e-06
	74	6.12639e-06	2.52442e-10	6.12664e-06	1.22637e-05	3.74407e-07			4.04852e-05	1.11884e-09	4.04864e-05	8.10466e-05	2.47472e-06
	75	5.94299e-06	1.78503e-10	5.94317e-06	1.18887e-05	3.62446e-07			3.92699e-05	7.91141e-10	3.92707e-05	7.85605e-05	2.39529e-06
	76	5.77125e-06	1.26221e-10	5.77138e-06	1.15389e-05	3.51366e-07			3.81334e-05	5.59421e-10	3.8134e-05	7.6244e-05	2.32181e-06
	77	5.60949e-06	8.92517e-11	5.60958e-06	1.12104e-05	3.41026e-07			3.70643e-05	3.9557e-10	3.70647e-05	7.40717e-05	2.25335e-06
	78	5.45634e-06	6.31105e-11	5.4564e-06	1.09002e-05	3.31317e-07			3.60534e-05	2.79711e-10	3.60536e-05	7.20229e-05	2.18915e-06
	79	5.31071e-06	4.46259e-11	5.31075e-06	1.06059e-05	3.22149e-07			3.50931e-05	1.97785e-10	3.50933e-05	7.00814e-05	2.1286e-06
	80	5.17173e-06	3.15553e-11	5.17176e-06	1.03256e-05	3.13451e-07			3.41775e-05	1.39855e-10	3.41776e-05	6.82338e-05	2.07122e-06
	81	5.03867e-06	2.23129e-11	5.03869e-06	1.00576e-05	3.05166e-07			3.33017e-05	9.88926e-11	3.33018e-05	6.64693e-05	2.01661e-06
	82	4.91096e-06	1.57776e-11	4.91097e-06	9.80075e-06	2.97247e-07			3.24616e-05	6.99276e-11	3.24616e-05	6.47792e-05	1.96446e-06
	83	4.78809e-06	1.11565e-11	4.7881e-06	9.55393e-06	2.89656e-07			3.16539e-05	4.94463e-11	3.1654e-05	6.31562e-05	1.91451e-06
	84	4.66968e-06	7.88881e-12	4.66969e-06	9.31629e-06	2.82361e-07			3.0876e-05	3.49638e-11	3.0876e-05	6.15945e-05	1.86655e-06
	85	4.55539e-06	5.57823e-12	4.55539e-06	9.08707e-06	2.75338e-07			3.01254e-05	2.47232e-11	3.01255e-05	6.0089e-05	1.82039e-06
	86	4.44492e-06	3.94441e-12	4.44493e-06	8.86569e-06	2.68564e-07			2.94004e-05	1.74819e-11	2.94004e-05	5.86355e-05	1.7759e-06
	87	4.33805e-06	2.78912e-12	4.33805e-06	8.65161e-06	2.62021e-07			2.86991e-05	1.23616e-11	2.86991e-05	5.72306e-05	1.73294e-06
	88	4.23455e-06	1.9722e-12	4.23455e-06	8.44439e-06	2.55694e-07			2.80202e-05	8.74096e-12	2.80202e-05	5.58711e-05	1.69142e-06
	89	4.13425e-06	1.39456e-12	4.13425e-06	8.24365e-06	2.49569e-07			2.73625e-05	6.18079e-12	2.73625e-05	5.45546e-05	1.65124e-06
	90	4.03699e-06	9.86102e-13	4.03699e-06	8.04905e-06	2.43637e-07			2.67248e-05	4.37048e-12	2.67249e-05	5.32787e-05	1.61233e-06
	91	3.94262e-06	6.97279e-13	3.94262e-06	7.86029e-06	2.37885e-07			2.61063e-05	3.09039e-12	2.61063e-05	5.20413e-05	1.57462e-06
	92	3.85102e-06	4.93051e-13	3.85102e-06	7.67711e-06	2.32307e-07			2.55061e-05	2.18524e-12	2.55061e-05	5.08409e-05	1.53805e-06
	93	3.76207e-06	3.4864e-13	3.76207e-06	7.49927e-06	2.26893e-07			2.49233e-05	1.5452e-12	2.49233e-05	4.96756e-05	1.50257e-06
	94	3.67567e-06	2.46525e-13	3.67567e-06	7.32656e-06	2.21637e-07			2.43573e-05	1.09262e-12	2.43573e-05	4.8544e-05	1.46813e-06
	95	3.59172e-06	1.7432e-13	3.59172e-06	7.15876e-06	2.16532e-07			2.38075e-05	7.72599e-13	2.38075e-05	4.74449e-05	1.43469e-06
	96	3.51014e-06	1.23263e-13	3.51014e-06	6.99571e-06	2.11573e-07			2.32732e-05	5.4631e-13	2.32732e-05	4.6377e-05	1.40221e-06
	97	3.43083e-06	8.71599e-14	3.43083e-06	6.83723e-06	2.06754e-07			2.27539e-05	3.86299e-13	2.27539e-05	4.53392e-05	1.37065e-06
	98	3.35372e-06	6.16313e-14	3.35372e-06	6.68315e-06	2.02071e-07			2.2249e-05	2.73155e-13	2.2249e-05	4.43304e-05	1.33998e-06
	99	3.27874e-06	4.35799e-14	3.27874e-06	6.53334e-06	1.97517e-07			2.17581e-05	1.9315e-13	2.17581e-05	4.33495e-05	1.31016e-06
	100	3.27874e-06	4.35799e-14	3.27874e-06	6.46057e-06	1.93089e-07			2.17581e-05	1.9315e-13	2.17581e-05	4.28731e-05	1.28117e-06
				Accumulation in yr 100	6.46057e-06	Gg C					Accumulation in yr 100	4.28731e-05	Gg C
				Accumulation in yr 100	23.6888	kg CO2 eq					Accumulation in yr 100	157.201	kg CO2 eq
				Total decomposition	2.9927e-05	Gg C					Total decomposition	0.000197375	Gg C
				Methane produced	1.99513e-05	Gg CH4					Methane produced	0.000131584	Gg CH4
				Methane produced	0.000498783	Gg CO2 eq					Methane produced	0.00328959	Gg CO2 eq
				CO2 produced	5.48661e-05	Gg CO2 eq					CO2 produced	0.000361855	Gg CO2 eq
				Total methane and CO2 produced	0.000553649	Gg CO2 eq					Total methane and CO2 produced	0.00365145	Gg CO2 eq
					553.649	kg CO2 eq						3651.45	kg CO2 eq
Secondary product wastes:		Unthinned							Thinned
		Gg C							Gg C
	yr	DDOCmd (wood)	DDOCmd (paper)	DDOCmd (total)	DDOCma	DDOCm decomp			DDOCmd (wood)	DDOCmd (paper)	DDOCmd (total)	DDOCma	DDOCma	DDOCm decomp
	0
	1
	2
	3
	4
	5
	6
	7
	8
	9
	10
	11
	12
	13
	14
	15
	16
	17
	18
	19
	20
	21
	22								0	0	0	0	0
	23								0	0	0	0	0
	24								0	0	0	0	0
	25								0	0	0	0	0
	26								0	0	0	0	0
	27								0	0	0	0	0
	28								0	0	0	0	0
	29								0	0	0	0	0
	30								0	0	0	0	0
	31								0	0	0	0	0
	32								0	0	0	0	0
	33								0	0	0	0	0
	34								0	0	0	0	0
	35								0	0	0	0	0
	36								0	0	0	0	0
	37								0	0	0	0	0
	38								0	0	0	0	0
	39								0	0	0	0	0
	40								0	0	0	0	0
	41								0	0	0	0	0
	42								0	0	0	0	0
	43								0	0	0	0	0
	44								0	0	0	0	0
	45								0	0	0	0	0
	46								0	0	0	0	0
	47								0	0	0	0	0
	48								0	0	0	0	0
	49								0	0	0	0	0
	50					0			-0.000336189	-5.5444e-07	-0.000336743	-0.000336743	0
	51	2.24652e-05	1.34791e-06	2.38131e-05	2.38131e-05	0			0.000155875	4.26399e-07	0.000156301	-0.000170489	-9.95226e-06
	52	7.47492e-06	1.38967e-06	8.86458e-06	3.19739e-05	7.03784e-07			4.85168e-05	4.16338e-07	4.89331e-05	0.000200615	-5.03872e-06
	53	6.69801e-06	1.29133e-06	7.98935e-06	1.65919e-05	9.44972e-07			4.37499e-05	3.75591e-07	4.41254e-05	9.16124e-05	5.92907e-06
	54	6.12407e-06	1.13139e-06	7.25545e-06	1.50087e-05	4.90366e-07			4.02029e-05	3.22997e-07	4.05259e-05	8.33473e-05	2.70756e-06
	55	5.69967e-06	9.54356e-07	6.65403e-06	1.3695e-05	4.43574e-07			3.75611e-05	2.68991e-07	3.78301e-05	7.71583e-05	2.46328e-06
	56	5.38561e-06	7.8397e-07	6.16958e-06	1.26269e-05	4.0475e-07			3.55915e-05	2.18913e-07	3.58104e-05	7.25225e-05	2.28037e-06
	57	5.15302e-06	6.31523e-07	5.78454e-06	1.17718e-05	3.73183e-07			3.41217e-05	1.75094e-07	3.42968e-05	6.90489e-05	2.14336e-06
	58	4.98058e-06	5.01123e-07	5.4817e-06	1.10953e-05	3.47909e-07			3.30235e-05	1.38163e-07	3.31616e-05	6.64449e-05	2.0407e-06
	59	4.85252e-06	3.92934e-07	5.24546e-06	1.05651e-05	3.27915e-07			3.22012e-05	1.07846e-07	3.2309e-05	6.44906e-05	1.96374e-06
	60	4.75715e-06	3.05131e-07	5.06229e-06	1.01527e-05	3.12247e-07			3.15834e-05	8.34352e-08	3.16668e-05	6.3021e-05	1.90598e-06
	61	4.68577e-06	2.35053e-07	4.92082e-06	9.8335e-06	3.00058e-07			3.11167e-05	6.40723e-08	3.11808e-05	6.19117e-05	1.86255e-06
	62	4.63189e-06	1.7985e-07	4.81174e-06	9.58713e-06	2.90624e-07			3.0761e-05	4.88944e-08	3.08099e-05	6.10691e-05	1.82977e-06
	63	4.59067e-06	1.3682e-07	4.72749e-06	9.39703e-06	2.83343e-07			3.0486e-05	3.71109e-08	3.05231e-05	6.04224e-05	1.80486e-06
	64	4.55851e-06	1.03567e-07	4.66208e-06	9.24985e-06	2.77724e-07			3.02692e-05	2.80356e-08	3.02972e-05	5.99183e-05	1.78575e-06
	65	4.53269e-06	7.80564e-08	4.61075e-06	9.13504e-06	2.73374e-07			3.00935e-05	2.10928e-08	3.01145e-05	5.95164e-05	1.77085e-06
	66	4.5112e-06	5.86048e-08	4.5698e-06	9.04428e-06	2.69981e-07			2.99459e-05	1.5812e-08	2.99617e-05	5.91862e-05	1.75897e-06
	67	4.49252e-06	4.38515e-08	4.53637e-06	8.97112e-06	2.67299e-07			2.98169e-05	1.18151e-08	2.98287e-05	5.89049e-05	1.74922e-06
	68	4.47553e-06	3.27129e-08	4.50825e-06	8.91055e-06	2.65137e-07			2.96992e-05	8.80308e-09	2.9708e-05	5.86551e-05	1.7409e-06
	69	4.45941e-06	2.43374e-08	4.48374e-06	8.85875e-06	2.63347e-07			2.95874e-05	6.54189e-09	2.95939e-05	5.84239e-05	1.73352e-06
	70	4.44352e-06	1.80618e-08	4.46158e-06	8.81281e-06	2.61816e-07			2.83944e-05	2.71712e-09	2.83971e-05	5.71164e-05	1.72669e-06
	71	4.42742e-06	1.33745e-08	4.4408e-06	8.77051e-06	2.60458e-07			3.04868e-05	6.73673e-09	3.04936e-05	5.80514e-05	1.68805e-06
	72	4.41079e-06	9.88352e-09	4.42067e-06	8.73022e-06	2.59208e-07			2.92765e-05	3.09107e-09	2.92796e-05	5.88719e-05	1.71568e-06
	73	4.3934e-06	7.29016e-09	4.40069e-06	8.69071e-06	2.58017e-07			2.9157e-05	2.26501e-09	2.91593e-05	5.75735e-05	1.73993e-06
	74	4.37509e-06	5.36808e-09	4.38046e-06	8.65109e-06	2.56849e-07			2.90318e-05	1.65767e-09	2.90335e-05	5.7331e-05	1.70156e-06
	75	4.35576e-06	3.94653e-09	4.35971e-06	8.6107e-06	2.55678e-07			2.89002e-05	1.2118e-09	2.89014e-05	5.70768e-05	1.69439e-06
	76	4.33535e-06	2.8972e-09	4.33825e-06	8.56911e-06	2.54485e-07			2.87617e-05	8.84904e-10	2.87625e-05	5.68098e-05	1.68688e-06
	77	4.31383e-06	2.12399e-09	4.31595e-06	8.52599e-06	2.53255e-07			2.86161e-05	6.45545e-10	2.86167e-05	5.65292e-05	1.67898e-06
	78	4.29119e-06	1.55518e-09	4.29275e-06	8.48115e-06	2.51981e-07			2.84633e-05	4.70486e-10	2.84638e-05	5.62347e-05	1.67069e-06
	79	4.26746e-06	1.13736e-09	4.26859e-06	8.43447e-06	2.50656e-07			2.83035e-05	3.42596e-10	2.83038e-05	5.59264e-05	1.66199e-06
	80	4.24264e-06	8.30881e-10	4.24347e-06	8.3859e-06	2.49276e-07			2.81368e-05	2.4926e-10	2.8137e-05	5.56044e-05	1.65288e-06
	81	4.21677e-06	6.06362e-10	4.21738e-06	8.33543e-06	2.47841e-07			2.79633e-05	1.81209e-10	2.79635e-05	5.52689e-05	1.64336e-06
	82	4.18991e-06	4.42085e-10	4.19035e-06	8.28309e-06	2.46349e-07			2.77834e-05	1.31639e-10	2.77835e-05	5.49206e-05	1.63344e-06
	83	4.16208e-06	3.22022e-10	4.1624e-06	8.22891e-06	2.44802e-07			2.75973e-05	9.55605e-11	2.75974e-05	5.45598e-05	1.62315e-06
	84	4.13334e-06	2.34365e-10	4.13358e-06	8.17296e-06	2.43201e-07			2.74054e-05	6.93236e-11	2.74055e-05	5.41873e-05	1.61249e-06
	85	4.10375e-06	1.70431e-10	4.10392e-06	8.11533e-06	2.41548e-07			2.72079e-05	5.02582e-11	2.7208e-05	5.38035e-05	1.60148e-06
	86	4.07334e-06	1.23844e-10	4.07347e-06	8.0561e-06	2.39844e-07			2.70053e-05	3.64139e-11	2.70053e-05	5.34092e-05	1.59013e-06
	87	4.04218e-06	8.9926e-11	4.04227e-06	7.99535e-06	2.38094e-07			2.67977e-05	2.6368e-11	2.67978e-05	5.30049e-05	1.57848e-06
	88	4.01031e-06	6.52526e-11	4.01038e-06	7.93318e-06	2.36298e-07			2.65857e-05	1.9083e-11	2.65857e-05	5.25914e-05	1.56653e-06
	89	3.97779e-06	4.73181e-11	3.97784e-06	7.86969e-06	2.34461e-07			2.63694e-05	1.38035e-11	2.63694e-05	5.21693e-05	1.55431e-06
	90	3.94466e-06	3.42916e-11	3.94469e-06	7.80496e-06	2.32584e-07			2.61492e-05	9.97956e-12	2.61492e-05	5.17392e-05	1.54184e-06
	91	3.91096e-06	2.48366e-11	3.91099e-06	7.73909e-06	2.30671e-07			2.59254e-05	7.21148e-12	2.59254e-05	5.13018e-05	1.52913e-06
	92	3.87676e-06	1.79785e-11	3.87678e-06	7.67218e-06	2.28725e-07			2.56984e-05	5.2088e-12	2.56984e-05	5.08576e-05	1.5162e-06
	93	3.84209e-06	1.30071e-11	3.8421e-06	7.6043e-06	2.26747e-07			2.54683e-05	3.76061e-12	2.54683e-05	5.04072e-05	1.50307e-06
	94	3.80699e-06	9.40556e-12	3.807e-06	7.53554e-06	2.24741e-07			2.52356e-05	2.71391e-12	2.52356e-05	4.99512e-05	1.48976e-06
	95	3.77151e-06	6.79793e-12	3.77151e-06	7.466e-06	2.22709e-07			2.50004e-05	1.95774e-12	2.50004e-05	4.94901e-05	1.47628e-06
	96	3.73568e-06	4.91094e-12	3.73569e-06	7.39573e-06	2.20654e-07			2.4763e-05	1.41171e-12	2.4763e-05	4.90245e-05	1.46265e-06
	97	3.69955e-06	3.54616e-12	3.69956e-06	7.32484e-06	2.18577e-07			2.45237e-05	1.01759e-12	2.45237e-05	4.85549e-05	1.44889e-06
	98	3.66315e-06	2.55955e-12	3.66316e-06	7.25337e-06	2.16482e-07			2.42827e-05	7.33231e-13	2.42827e-05	4.80817e-05	1.43501e-06
	99	-1.04984e-05	1.84668e-12	-1.04984e-05	-6.94349e-06	2.1437e-07			2.40403e-05	5.28152e-13	2.40403e-05	4.76054e-05	1.42103e-06
	100	0.00018464	1.35535e-12	0.00018464	0.000174452	-2.05211e-07			0.00103582	1.2881e-12	0.00103582	0.00105915	1.40695e-06
				Accumulation in yr 100	0.000174452	Gg C					Accumulation in yr 100	0.00105915	Gg C
				Accumulation in yr 100	639.657	kg CO2 eq					Accumulation in yr 100	3883.55	kg CO2 eq
				Total decomposition	1.38548e-05	Gg C					Total decomposition	7.17314e-05	Gg C
				Methane produced	9.2365e-06	Gg CH4					Methane produced	4.78209e-05	Gg CH4
				Methane produced	0.000230913	Gg CO2 eq					Methane produced	0.00119552	Gg CO2 eq
				CO2 produced	2.54004e-05	Gg CO2 eq					CO2 produced	0.000131508	Gg CO2 eq
				Total methane and CO2 produced	0.000256313	Gg CO2 eq					Total methane and CO2 produced	0.00132703	Gg CO2 eq
					256.313	kg CO2 eq						1327.03	kg CO2 eq

## Sheet: Decarbonisation factors
		2020-2029		2030-2039		2040-2049		2050-2084		2085-2120
		Core	FA	Core	FA	Core	FA	Core	FA	Core	FA
	C storage - BECCS (biomass electricity)	0	0	0.09	0.45	0.18	0.9	0.45	1	0.9	1
	C storage - BECCS (biomass heat)	0	0	0	0	0	0.405	0	0.81	0.405	0.9
	Avoided emissions - Biomass (heat) - marginal supply	1	1	1	1	1	0.25258	0.9	0.039435	0	0
	Avoided emissions - Biomass (electricity) - marginal supply	1	1	0.9127	0.5635	0.8254	0.127	0.5635	0	0.127	0
	Avoided emissions - Incineration (electricity) - marginal supply	1	1	0.9127	0.5635	0.8254	0.127	0.5635	0	0.127	0
	Incineration (heat) - marginal supply	1	1	1	1	1	1	0.9	0.039435	0	0
	Avoided emissions - Cement production - CCS application (calcination)	1	1	1	1	1	1	1	0.45568	0.93952	0.3952
	Avoided emissions - Cement production - furnace emissions reduction	1	1	1	1	1	1	0.9784	0.95104	0.95104	0.712
	Emissions - Wood panel (particle board) production (CCS on heat production)	1	1	1	1	1	0.6355	1	0.271	0.6355	0.19
	Emissions - Harvester/forwarder	1	1	1	1	1	0.55	0.87	0.1	0	0
		C storage - BECCS (biomass electricity)	C storage - BECCS (biomass heat)	Avoided emissions - Biomass (heat) - marginal supply	Avoided emissions - Biomass (electricity) - marginal supply	Avoided emissions - Incineration (electricity) - marginal supply	Incineration (heat) - marginal supply	Avoided emissions - Cement production - CCS application (calcination)	Avoided emissions - Cement production - furnace emissions reduction	Emissions - Wood panel (particle board) production (CCS on heat production)	Emissions - Harvester/forwarder	C storage - BECCS (biomass electricity)	C storage - BECCS (biomass heat)	Avoided emissions - Biomass (heat) - marginal supply	Avoided emissions - Biomass (electricity) - marginal supply	Avoided emissions - Incineration (electricity) - marginal supply	Incineration (heat) - marginal supply	Avoided emissions - Cement production - CCS application (calcination)	Avoided emissions - Cement production - furnace emissions reduction	Emissions - Wood panel (particle board) production (CCS on heat production)	Emissions - Harvester/forwarder
		Core										FA
Year	Year
1	2023	0	0	1	1	1	1	1	1	1	1	1	1	1	1	1	1	1	1	1	1
2	2024	0	0	1	1	1	1	1	1	1	1	1	1	1	1	1	1	1	1	1	1
3	2025	0	0	1	1	1	1	1	1	1	1	1	1	1	1	1	1	1	1	1	1
4	2026	0	0	1	1	1	1	1	1	1	1	1	1	1	1	1	1	1	1	1	1
5	2027	0	0	1	1	1	1	1	1	1	1	1	1	1	1	1	1	1	1	1	1
6	2028	0	0	1	1	1	1	1	1	1	1	1	1	1	1	1	1	1	1	1	1
7	2029	0	0	1	1	1	1	1	1	1	1	1	1	1	1	1	1	1	1	1	1
8	2030	0.09	0	1	0.9127	0.9127	1	1	1	1	1	1	1	1	1	1	1	1	1	1	1
9	2031	0.09	0	1	0.9127	0.9127	1	1	1	1	1	1	1	1	1	1	1	1	1	1	1
10	2032	0.09	0	1	0.9127	0.9127	1	1	1	1	1	1	1	1	1	1	1	1	1	1	1
11	2033	0.09	0	1	0.9127	0.9127	1	1	1	1	1	1	1	1	1	1	1	1	1	1	1
12	2034	0.09	0	1	0.9127	0.9127	1	1	1	1	1	1	1	1	1	1	1	1	1	1	1
13	2035	0.09	0	1	0.9127	0.9127	1	1	1	1	1	1	1	1	1	1	1	1	1	1	1
14	2036	0.09	0	1	0.9127	0.9127	1	1	1	1	1	1	1	1	1	1	1	1	1	1	1
15	2037	0.09	0	1	0.9127	0.9127	1	1	1	1	1	1	1	1	1	1	1	1	1	1	1
16	2038	0.09	0	1	0.9127	0.9127	1	1	1	1	1	1	1	1	1	1	1	1	1	1	1
17	2039	0.09	0	1	0.9127	0.9127	1	1	1	1	1	1	1	1	1	1	1	1	1	1	1
18	2040	0.18	0	1	0.8254	0.8254	1	1	1	1	1	1	1	1	1	1	1	1	1	1	1
19	2041	0.18	0	1	0.8254	0.8254	1	1	1	1	1	1	1	1	1	1	1	1	1	1	1
20	2042	0.18	0	1	0.8254	0.8254	1	1	1	1	1	1	1	1	1	1	1	1	1	1	1
21	2043	0.18	0	1	0.8254	0.8254	1	1	1	1	1	1	1	1	1	1	1	1	1	1	1
22	2044	0.18	0	1	0.8254	0.8254	1	1	1	1	1	1	1	1	1	1	1	1	1	1	1
23	2045	0.18	0	1	0.8254	0.8254	1	1	1	1	1	1	1	1	1	1	1	1	1	1	1
24	2046	0.18	0	1	0.8254	0.8254	1	1	1	1	1	1	1	1	1	1	1	1	1	1	1
25	2047	0.18	0	1	0.8254	0.8254	1	1	1	1	1	1	1	1	1	1	1	1	1	1	1
26	2048	0.18	0	1	0.8254	0.8254	1	1	1	1	1	1	1	1	1	1	1	1	1	1	1
27	2049	0.18	0	1	0.8254	0.8254	1	1	1	1	1	1	1	1	1	1	1	1	1	1	1
28	2050	0.45	0	0.9	0.5635	0.5635	0.9	1	0.9784	1	0.87	1	1	1	1	1	1	1	1	1	1
29	2051	0.45	0	0.9	0.5635	0.5635	0.9	1	0.9784	1	0.87	1	1	1	1	1	1	1	1	1	1
30	2052	0.45	0	0.9	0.5635	0.5635	0.9	1	0.9784	1	0.87	1	1	1	1	1	1	1	1	1	1
31	2053	0.45	0	0.9	0.5635	0.5635	0.9	1	0.9784	1	0.87	1	1	1	1	1	1	1	1	1	1
32	2054	0.45	0	0.9	0.5635	0.5635	0.9	1	0.9784	1	0.87	1	1	1	1	1	1	1	1	1	1
33	2055	0.45	0	0.9	0.5635	0.5635	0.9	1	0.9784	1	0.87	1	1	1	1	1	1	1	1	1	1
34	2056	0.45	0	0.9	0.5635	0.5635	0.9	1	0.9784	1	0.87	1	1	1	1	1	1	1	1	1	1
35	2057	0.45	0	0.9	0.5635	0.5635	0.9	1	0.9784	1	0.87	1	1	1	1	1	1	1	1	1	1
36	2058	0.45	0	0.9	0.5635	0.5635	0.9	1	0.9784	1	0.87	1	1	1	1	1	1	1	1	1	1
37	2059	0.45	0	0.9	0.5635	0.5635	0.9	1	0.9784	1	0.87	1	1	1	1	1	1	1	1	1	1
38	2060	0.45	0	0.9	0.5635	0.5635	0.9	1	0.9784	1	0.87	1	1	1	1	1	1	1	1	1	1
39	2061	0.45	0	0.9	0.5635	0.5635	0.9	1	0.9784	1	0.87	1	1	1	1	1	1	1	1	1	1
40	2062	0.45	0	0.9	0.5635	0.5635	0.9	1	0.9784	1	0.87	1	1	1	1	1	1	1	1	1	1
41	2063	0.45	0	0.9	0.5635	0.5635	0.9	1	0.9784	1	0.87	1	1	1	1	1	1	1	1	1	1
42	2064	0.45	0	0.9	0.5635	0.5635	0.9	1	0.9784	1	0.87	1	1	1	1	1	1	1	1	1	1
43	2065	0.45	0	0.9	0.5635	0.5635	0.9	1	0.9784	1	0.87	1	1	1	1	1	1	1	1	1	1
44	2066	0.45	0	0.9	0.5635	0.5635	0.9	1	0.9784	1	0.87	1	1	1	1	1	1	1	1	1	1
45	2067	0.45	0	0.9	0.5635	0.5635	0.9	1	0.9784	1	0.87	1	1	1	1	1	1	1	1	1	1
46	2068	0.45	0	0.9	0.5635	0.5635	0.9	1	0.9784	1	0.87	1	1	1	1	1	1	1	1	1	1
47	2069	0.45	0	0.9	0.5635	0.5635	0.9	1	0.9784	1	0.87	1	1	1	1	1	1	1	1	1	1
48	2070	0.45	0	0.9	0.5635	0.5635	0.9	1	0.9784	1	0.87	1	1	1	1	1	1	1	1	1	1
49	2071	0.45	0	0.9	0.5635	0.5635	0.9	1	0.9784	1	0.87	1	1	1	1	1	1	1	1	1	1
50	2072	0.45	0	0.9	0.5635	0.5635	0.9	1	0.9784	1	0.87	1	1	1	1	1	1	1	1	1	1
51	2073	0.45	0	0.9	0.5635	0.5635	0.9	1	0.9784	1	0.87	1	1	1	1	1	1	1	1	1	1
52	2074	0.45	0	0.9	0.5635	0.5635	0.9	1	0.9784	1	0.87	1	1	1	1	1	1	1	1	1	1
53	2075	0.45	0	0.9	0.5635	0.5635	0.9	1	0.9784	1	0.87	1	1	1	1	1	1	1	1	1	1
54	2076	0.45	0	0.9	0.5635	0.5635	0.9	1	0.9784	1	0.87	1	1	1	1	1	1	1	1	1	1
55	2077	0.45	0	0.9	0.5635	0.5635	0.9	1	0.9784	1	0.87	1	1	1	1	1	1	1	1	1	1
56	2078	0.45	0	0.9	0.5635	0.5635	0.9	1	0.9784	1	0.87	1	1	1	1	1	1	1	1	1	1
57	2079	0.45	0	0.9	0.5635	0.5635	0.9	1	0.9784	1	0.87	1	1	1	1	1	1	1	1	1	1
58	2080	0.45	0	0.9	0.5635	0.5635	0.9	1	0.9784	1	0.87	1	1	1	1	1	1	1	1	1	1
59	2081	0.45	0	0.9	0.5635	0.5635	0.9	1	0.9784	1	0.87	1	1	1	1	1	1	1	1	1	1
60	2082	0.45	0	0.9	0.5635	0.5635	0.9	1	0.9784	1	0.87	1	1	1	1	1	1	1	1	1	1
61	2083	0.45	0	0.9	0.5635	0.5635	0.9	1	0.9784	1	0.87	1	1	1	1	1	1	1	1	1	1
62	2084	0.45	0	0.9	0.5635	0.5635	0.9	1	0.9784	1	0.87	1	1	1	1	1	1	1	1	1	1
63	2085	0.9	0.405	0	0.127	0.127	0	0.93952	0.95104	0.6355	0	1	1	1	1	1	1	1	1	1	1
64	2086	0.9	0.405	0	0.127	0.127	0	0.93952	0.95104	0.6355	0	1	1	1	1	1	1	1	1	1	1
65	2087	0.9	0.405	0	0.127	0.127	0	0.93952	0.95104	0.6355	0	1	1	1	1	1	1	1	1	1	1
66	2088	0.9	0.405	0	0.127	0.127	0	0.93952	0.95104	0.6355	0	1	1	1	1	1	1	1	1	1	1
67	2089	0.9	0.405	0	0.127	0.127	0	0.93952	0.95104	0.6355	0	1	1	1	1	1	1	1	1	1	1
68	2090	0.9	0.405	0	0.127	0.127	0	0.93952	0.95104	0.6355	0	1	1	1	1	1	1	1	1	1	1
69	2091	0.9	0.405	0	0.127	0.127	0	0.93952	0.95104	0.6355	0	1	1	1	1	1	1	1	1	1	1
70	2092	0.9	0.405	0	0.127	0.127	0	0.93952	0.95104	0.6355	0	1	1	1	1	1	1	1	1	1	1
71	2093	0.9	0.405	0	0.127	0.127	0	0.93952	0.95104	0.6355	0	1	1	1	1	1	1	1	1	1	1
72	2094	0.9	0.405	0	0.127	0.127	0	0.93952	0.95104	0.6355	0	1	1	1	1	1	1	1	1	1	1
73	2095	0.9	0.405	0	0.127	0.127	0	0.93952	0.95104	0.6355	0	1	1	1	1	1	1	1	1	1	1
74	2096	0.9	0.405	0	0.127	0.127	0	0.93952	0.95104	0.6355	0	1	1	1	1	1	1	1	1	1	1
75	2097	0.9	0.405	0	0.127	0.127	0	0.93952	0.95104	0.6355	0	1	1	1	1	1	1	1	1	1	1
76	2098	0.9	0.405	0	0.127	0.127	0	0.93952	0.95104	0.6355	0	1	1	1	1	1	1	1	1	1	1
77	2099	0.9	0.405	0	0.127	0.127	0	0.93952	0.95104	0.6355	0	1	1	1	1	1	1	1	1	1	1
78	2100	0.9	0.405	0	0.127	0.127	0	0.93952	0.95104	0.6355	0	1	1	1	1	1	1	1	1	1	1
79	2101	0.9	0.405	0	0.127	0.127	0	0.93952	0.95104	0.6355	0	1	1	1	1	1	1	1	1	1	1
80	2102	0.9	0.405	0	0.127	0.127	0	0.93952	0.95104	0.6355	0	1	1	1	1	1	1	1	1	1	1
81	2103	0.9	0.405	0	0.127	0.127	0	0.93952	0.95104	0.6355	0	1	1	1	1	1	1	1	1	1	1
82	2104	0.9	0.405	0	0.127	0.127	0	0.93952	0.95104	0.6355	0	1	1	1	1	1	1	1	1	1	1
83	2105	0.9	0.405	0	0.127	0.127	0	0.93952	0.95104	0.6355	0	1	1	1	1	1	1	1	1	1	1
84	2106	0.9	0.405	0	0.127	0.127	0	0.93952	0.95104	0.6355	0	1	1	1	1	1	1	1	1	1	1
85	2107	0.9	0.405	0	0.127	0.127	0	0.93952	0.95104	0.6355	0	1	1	1	1	1	1	1	1	1	1
86	2108	0.9	0.405	0	0.127	0.127	0	0.93952	0.95104	0.6355	0	1	1	1	1	1	1	1	1	1	1
87	2109	0.9	0.405	0	0.127	0.127	0	0.93952	0.95104	0.6355	0	1	1	1	1	1	1	1	1	1	1
88	2110	0.9	0.405	0	0.127	0.127	0	0.93952	0.95104	0.6355	0	1	1	1	1	1	1	1	1	1	1
89	2111	0.9	0.405	0	0.127	0.127	0	0.93952	0.95104	0.6355	0	1	1	1	1	1	1	1	1	1	1
90	2112	0.9	0.405	0	0.127	0.127	0	0.93952	0.95104	0.6355	0	1	1	1	1	1	1	1	1	1	1
91	2113	0.9	0.405	0	0.127	0.127	0	0.93952	0.95104	0.6355	0	1	1	1	1	1	1	1	1	1	1
92	2114	0.9	0.405	0	0.127	0.127	0	0.93952	0.95104	0.6355	0	1	1	1	1	1	1	1	1	1	1
93	2115	0.9	0.405	0	0.127	0.127	0	0.93952	0.95104	0.6355	0	1	1	1	1	1	1	1	1	1	1
94	2116	0.9	0.405	0	0.127	0.127	0	0.93952	0.95104	0.6355	0	1	1	1	1	1	1	1	1	1	1
95	2117	0.9	0.405	0	0.127	0.127	0	0.93952	0.95104	0.6355	0	1	1	1	1	1	1	1	1	1	1
96	2118	0.9	0.405	0	0.127	0.127	0	0.93952	0.95104	0.6355	0	1	1	1	1	1	1	1	1	1	1
97	2119	0.9	0.405	0	0.127	0.127	0	0.93952	0.95104	0.6355	0	1	1	1	1	1	1	1	1	1	1
98	2120	0.9	0.405	0	0.127	0.127	0	0.93952	0.95104	0.6355	0	1	1	1	1	1	1	1	1	1	1
99	2121	FALSE	FALSE	FALSE	FALSE	FALSE	FALSE	FALSE	FALSE	FALSE	FALSE	1	1	1	1	1	1	1	1	1	1
100	2122	FALSE	FALSE	FALSE	FALSE	FALSE	FALSE	FALSE	FALSE	FALSE	FALSE	1	1	1	1	1	1	1	1	1	1

## Sheet: MH (1)
HWP Module Master - Main Harvest (Eire BAU)
Numbers in table are shown as accumulation (or decay) over 100 years. Year 1 is the year of harvest. Decarbonisation factors have been applied. Units are in Mg CO2e. Reference flow is biomass containing 1000 Mg C (or 3666.7 Mg CO2e).
														Reference flow (biomass containing 1000Mg C)	Actual flow
		C storage - HWPs:		C storage - BECCS:			Avoided emissions:						Process emissions:	Total																						TOTAL:
		HWP - primary + recycled	HWP - mulch	BECCS - Biogenic C emissions primary - electricity	BECCS - Biogenic C emissions primary - heat	BECCS - Biogenic C emissions primary waste + secondary waste (electricity only)	Avoided emissions - FF (primary electricity, biomass+incineration)	Avoided emissions - FF (secondary electricity, biomass+incineration)	Avoided emissions - FF (biomass, heat)	Avoided emissions - FF (incineration, electricity)	Avoided emissions - FF (incineration, heat)	Avoided emissions - concrete	Primary process emissions	Total	Total (non-ref)	HWP C storage	BECCS C stroage	Avoided emissions	Process emisisons	(Total check)
Year	Year
1	2023	-2418.52	-182.689	0	0	0	-886.738	-51.3289	0	-14.2322	-0.171354	-2144.16	950.704	-4747.13	0	0	0	0	0	0
2	2024	-2386.65	-180.862	0	0	0	-886.738	-102.658	0	-28.4644	-0.342707	-2144.16	950.704	-4779.17	0	0	0	0	0	0
3	2025	-2317.41	-179.035	0	0	0	-886.738	-153.987	0	-42.6965	-0.514061	-2144.16	950.704	-4773.83	0	0	0	0	0	0
4	2026	-2258.38	-177.208	0	0	0	-886.738	-205.316	0	-56.9287	-0.685415	-2144.16	950.704	-4778.71	0	0	0	0	0	0
5	2027	-2207.25	-175.381	0	0	0	-886.738	-256.645	0	-71.1609	-0.856768	-2144.16	950.704	-4791.49	0	0	0	0	0	0
6	2028	-2162.25	-173.554	0	0	0	-886.738	-278.355	0	-85.3931	-1.02812	-2144.16	950.704	-4780.77	0	0	0	0	0	0
7	2029	-2122	-171.728	0	0	0	-886.738	-300.066	0	-99.6253	-1.19948	-2144.16	950.704	-4774.81	0	0	0	0	0	0
8	2030	-2085.46	-169.901	0	0	-1.06885	-886.738	-319.882	0	-112.615	-1.37083	-2144.16	950.704	-4770.48	0	0	0	0	0	0
9	2031	-2051.81	-168.074	0	0	-2.1377	-886.738	-339.697	0	-125.605	-1.54218	-2144.16	950.704	-4769.06	0	0	0	0	0	0
10	2032	-2020.45	-166.247	0	0	-3.20655	-886.738	-359.513	0	-138.594	-1.71354	-2144.16	950.704	-4769.91	0	0	0	0	0	0
11	2033	-1990.89	-164.42	0	0	-4.2754	-886.738	-369.589	0	-151.584	-1.88489	-2144.16	950.704	-4762.83	0	0	0	0	0	0
12	2034	-1962.77	-162.593	0	0	-5.34425	-886.738	-379.665	0	-164.574	-2.05624	-2144.16	950.704	-4757.19	0	0	0	0	0	0
13	2035	-1935.81	-160.766	0	0	-6.4131	-886.738	-389.741	0	-177.564	-2.2276	-2144.16	950.704	-4752.71	0	0	0	0	0	0
14	2036	-1909.79	-158.939	0	0	-7.48195	-886.738	-399.817	0	-190.553	-2.39895	-2144.16	950.704	-4749.17	0	0	0	0	0	0
15	2037	-1884.55	-157.112	0	0	-8.5508	-886.738	-409.893	0	-203.543	-2.5703	-2144.16	950.704	-4746.41	0	0	0	0	0	0
16	2038	-1859.96	-155.286	0	0	-9.61965	-886.738	-419.97	0	-216.533	-2.74166	-2144.16	950.704	-4744.3	0	0	0	0	0	0
17	2039	-1835.92	-153.459	0	0	-10.6885	-886.738	-430.046	0	-229.522	-2.91301	-2144.16	950.704	-4742.74	0	0	0	0	0	0
18	2040	-1812.36	-151.632	0	0	-12.8262	-886.738	-439.158	0	-241.27	-3.08437	-2144.16	950.704	-4740.52	0	0	0	0	0	0
19	2041	-1789.21	-149.805	0	0	-14.9639	-886.738	-448.27	0	-253.017	-3.25572	-2144.16	950.704	-4738.72	0	0	0	0	0	0
20	2042	-1766.44	-147.978	0	0	-17.1016	-886.738	-457.383	0	-264.764	-3.42707	-2144.16	950.704	-4737.29	0	0	0	0	0	0
21	2043	-1744.01	-146.151	0	0	-19.2393	-886.738	-461.948	0	-276.511	-3.59843	-2144.16	950.704	-4731.65	0	0	0	0	0	0
22	2044	-1722.43	-144.324	0	0	-21.377	-886.738	-466.513	0	-288.259	-3.76978	-2144.16	950.704	-4726.87	0	0	0	0	0	0
23	2045	-1700.59	-142.497	0	0	-23.5147	-886.738	-471.078	0	-300.006	-3.94113	-2144.16	950.704	-4721.81	0	0	0	0	0	0
24	2046	-1679.02	-140.67	0	0	-25.6524	-886.738	-475.643	0	-311.753	-4.11249	-2144.16	950.704	-4717.04	0	0	0	0	0	0
25	2047	-1657.71	-138.844	0	0	-27.7901	-886.738	-480.208	0	-323.5	-4.28384	-2144.16	950.704	-4712.53	0	0	0	0	0	0
26	2048	-1636.66	-137.017	0	0	-29.9278	-886.738	-484.773	0	-335.248	-4.45519	-2144.16	950.704	-4708.27	0	0	0	0	0	0
27	2049	-1615.86	-135.19	0	0	-32.0655	-886.738	-489.338	0	-346.995	-4.62655	-2144.16	950.704	-4704.26	0	0	0	0	0	0
28	2050	-1595.3	-133.363	0	0	-37.4097	-886.738	-492.455	0	-355.015	-4.78077	-2144.16	950.704	-4698.51	0	0	0	0	0	0
29	2051	-1574.97	-131.536	0	0	-42.754	-886.738	-495.571	0	-363.035	-4.93498	-2144.16	950.704	-4692.99	0	0	0	0	0	0
30	2052	-1554.88	-129.709	0	0	-48.0982	-886.738	-498.688	0	-371.054	-5.0892	-2144.16	950.704	-4687.71	0	0	0	0	0	0
31	2053	-1535.01	-127.882	0	0	-53.4425	-886.738	-501.804	0	-379.074	-5.24342	-2144.16	950.704	-4682.65	0	0	0	0	0	0
32	2054	-1515.38	-126.055	0	0	-58.7867	-886.738	-504.921	0	-387.094	-5.39764	-2144.16	950.704	-4677.82	0	0	0	0	0	0
33	2055	-1495.97	-124.228	0	0	-64.131	-886.738	-508.037	0	-395.114	-5.55186	-2144.16	950.704	-4673.22	0	0	0	0	0	0
34	2056	-1476.78	-122.402	0	0	-69.4752	-886.738	-511.154	0	-403.134	-5.70608	-2144.16	950.704	-4668.84	0	0	0	0	0	0
35	2057	-1457.82	-120.575	0	0	-74.8195	-886.738	-514.271	0	-411.154	-5.86029	-2144.16	950.704	-4664.69	0	0	0	0	0	0
36	2058	-1439.08	-118.748	0	0	-80.1637	-886.738	-517.387	0	-419.173	-6.01451	-2144.16	950.704	-4660.75	0	0	0	0	0	0
37	2059	-1420.56	-116.921	0	0	-85.508	-886.738	-520.504	0	-427.193	-6.16873	-2144.16	950.704	-4657.04	0	0	0	0	0	0
38	2060	-1402.25	-115.094	0	0	-90.8522	-886.738	-523.62	0	-435.213	-6.32295	-2144.16	950.704	-4653.54	0	0	0	0	0	0
39	2061	-1384.17	-113.267	0	0	-96.1965	-886.738	-526.737	0	-443.233	-6.47717	-2144.16	950.704	-4650.27	0	0	0	0	0	0
40	2062	-1366.3	-111.44	0	0	-101.541	-886.738	-529.853	0	-451.253	-6.63139	-2144.16	950.704	-4647.2	0	0	0	0	0	0
41	2063	-1348.64	-109.613	0	0	-106.885	-886.738	-532.97	0	-459.273	-6.7856	-2144.16	950.704	-4644.36	0	0	0	0	0	0
42	2064	-1331.2	-107.786	0	0	-112.229	-886.738	-536.086	0	-467.292	-6.93982	-2144.16	950.704	-4641.73	0	0	0	0	0	0
43	2065	-1313.97	-105.96	0	0	-117.573	-886.738	-539.203	0	-475.312	-7.09404	-2144.16	950.704	-4639.31	0	0	0	0	0	0
44	2066	-1296.96	-104.133	0	0	-122.918	-886.738	-542.32	0	-483.332	-7.24826	-2144.16	950.704	-4637.1	0	0	0	0	0	0
45	2067	-1280.15	-102.306	0	0	-128.262	-886.738	-545.436	0	-491.352	-7.40248	-2144.16	950.704	-4635.1	0	0	0	0	0	0
46	2068	-1263.55	-100.479	0	0	-133.606	-886.738	-548.553	0	-499.372	-7.5567	-2144.16	950.704	-4633.31	0	0	0	0	0	0
47	2069	-1247.16	-98.652	0	0	-138.95	-886.738	-551.669	0	-507.392	-7.71091	-2144.16	950.704	-4631.73	0	0	0	0	0	0
48	2070	-1230.98	-96.8251	0	0	-144.295	-886.738	-554.786	0	-515.411	-7.86513	-2144.16	950.704	-4630.35	0	0	0	0	0	0
49	2071	-1215	-94.9982	0	0	-149.639	-886.738	-557.902	0	-523.431	-8.01935	-2144.16	950.704	-4629.18	0	0	0	0	0	0
50	2072	-1199.22	-93.1713	0	0	-154.983	-886.738	-561.019	0	-531.451	-8.17357	-2144.16	950.704	-4628.21	0	0	0	0	0	0
51	2073	-1183.65	-91.3444	0	0	-160.327	-886.738	-562.478	0	-539.471	-8.32779	-2144.16	950.704	-4625.79	0	0	0	0	0	0
52	2074	-1168.27	-89.5176	0	0	-165.672	-886.738	-563.938	0	-547.491	-8.482	-2144.16	950.704	-4623.56	0	0	0	0	0	0
53	2075	-1153.1	-87.6907	0	0	-171.016	-886.738	-565.397	0	-555.511	-8.63622	-2144.16	950.704	-4621.54	0	0	0	0	0	0
54	2076	-1138.12	-85.8638	0	0	-176.36	-886.738	-566.857	0	-563.53	-8.79044	-2144.16	950.704	-4619.71	0	0	0	0	0	0
55	2077	-1123.33	-84.0369	0	0	-181.704	-886.738	-568.316	0	-571.55	-8.94466	-2144.16	950.704	-4618.07	0	0	0	0	0	0
56	2078	-1108.74	-82.21	0	0	-187.049	-886.738	-569.776	0	-579.57	-9.09888	-2144.16	950.704	-4616.63	0	0	0	0	0	0
57	2079	-1094.34	-80.3831	0	0	-192.393	-886.738	-571.236	0	-587.59	-9.2531	-2144.16	950.704	-4615.38	0	0	0	0	0	0
58	2080	-1080.12	-78.5562	0	0	-197.737	-886.738	-572.695	0	-595.61	-9.40731	-2144.16	950.704	-4614.32	0	0	0	0	0	0
59	2081	-1066.1	-76.7293	0	0	-203.081	-886.738	-574.155	0	-603.63	-9.56153	-2144.16	950.704	-4613.45	0	0	0	0	0	0
60	2082	-1052.26	-74.9024	0	0	-208.426	-886.738	-575.614	0	-611.649	-9.71575	-2144.16	950.704	-4612.76	0	0	0	0	0	0
61	2083	-1038.61	-73.0756	0	0	-213.77	-886.738	-577.074	0	-619.669	-9.86997	-2144.16	950.704	-4612.26	0	0	0	0	0	0
62	2084	-1025.14	-71.2487	0	0	-219.114	-886.738	-578.533	0	-627.689	-10.0242	-2144.16	950.704	-4611.94	0	0	0	0	0	0
63	2085	-1011.85	-69.4218	0	0	-229.803	-886.738	-578.862	0	-629.497	-10.0242	-2144.16	950.704	-4609.65	0	0	0	0	0	0
64	2086	-998.739	-67.5949	0	0	-240.491	-886.738	-579.191	0	-631.304	-10.0242	-2144.16	950.704	-4607.53	0	0	0	0	0	0
65	2087	-985.804	-65.768	0	0	-251.18	-886.738	-579.52	0	-633.112	-10.0242	-2144.16	950.704	-4605.6	0	0	0	0	0	0
66	2088	-973.045	-63.9411	0	0	-261.868	-886.738	-579.849	0	-634.919	-10.0242	-2144.16	950.704	-4603.84	0	0	0	0	0	0
67	2089	-960.458	-62.1142	0	0	-272.557	-886.738	-580.178	0	-636.727	-10.0242	-2144.16	950.704	-4602.25	0	0	0	0	0	0
68	2090	-948.043	-60.2873	0	0	-283.245	-886.738	-580.507	0	-638.534	-10.0242	-2144.16	950.704	-4600.83	0	0	0	0	0	0
69	2091	-935.797	-58.4604	0	0	-293.934	-886.738	-580.836	0	-640.341	-10.0242	-2144.16	950.704	-4599.58	0	0	0	0	0	0
70	2092	-923.718	-56.6336	0	0	-304.622	-886.738	-581.165	0	-642.149	-10.0242	-2144.16	950.704	-4598.5	0	0	0	0	0	0
71	2093	-911.805	-54.8067	0	0	-315.311	-886.738	-581.494	0	-643.956	-10.0242	-2144.16	950.704	-4597.59	0	0	0	0	0	0
72	2094	-900.055	-52.9798	0	0	-325.999	-886.738	-581.823	0	-645.764	-10.0242	-2144.16	950.704	-4596.83	0	0	0	0	0	0
73	2095	-888.467	-51.1529	0	0	-336.688	-886.738	-582.151	0	-647.571	-10.0242	-2144.16	950.704	-4596.24	0	0	0	0	0	0
74	2096	-877.039	-49.326	0	0	-347.376	-886.738	-582.48	0	-649.379	-10.0242	-2144.16	950.704	-4595.81	0	0	0	0	0	0
75	2097	-865.769	-47.4991	0	0	-358.065	-886.738	-582.809	0	-651.186	-10.0242	-2144.16	950.704	-4595.54	0	0	0	0	0	0
76	2098	-854.654	-45.6722	0	0	-368.753	-886.738	-583.138	0	-652.994	-10.0242	-2144.16	950.704	-4595.43	0	0	0	0	0	0
77	2099	-843.694	-43.8453	0	0	-379.442	-886.738	-583.467	0	-654.801	-10.0242	-2144.16	950.704	-4595.46	0	0	0	0	0	0
78	2100	-832.886	-42.0184	0	0	-390.13	-886.738	-583.796	0	-656.609	-10.0242	-2144.16	950.704	-4595.65	0	0	0	0	0	0
79	2101	-822.228	-40.1916	0	0	-400.819	-886.738	-584.125	0	-658.416	-10.0242	-2144.16	950.704	-4595.99	0	0	0	0	0	0
80	2102	-811.718	-38.3647	0	0	-411.507	-886.738	-584.454	0	-660.224	-10.0242	-2144.16	950.704	-4596.48	0	0	0	0	0	0
81	2103	-801.356	-36.5378	0	0	-422.196	-886.738	-584.783	0	-662.031	-10.0242	-2144.16	950.704	-4597.12	0	0	0	0	0	0
82	2104	-791.137	-34.7109	0	0	-432.884	-886.738	-585.112	0	-663.839	-10.0242	-2144.16	950.704	-4597.9	0	0	0	0	0	0
83	2105	-781.062	-32.884	0	0	-443.573	-886.738	-585.441	0	-665.646	-10.0242	-2144.16	950.704	-4598.82	0	0	0	0	0	0
84	2106	-771.128	-31.0571	0	0	-454.261	-886.738	-585.77	0	-667.454	-10.0242	-2144.16	950.704	-4599.88	0	0	0	0	0	0
85	2107	-761.333	-29.2302	0	0	-464.95	-886.738	-586.099	0	-669.261	-10.0242	-2144.16	950.704	-4601.09	0	0	0	0	0	0
86	2108	-751.675	-27.4033	0	0	-475.638	-886.738	-586.428	0	-671.069	-10.0242	-2144.16	950.704	-4602.43	0	0	0	0	0	0
87	2109	-742.153	-25.5764	0	0	-486.327	-886.738	-586.757	0	-672.876	-10.0242	-2144.16	950.704	-4603.9	0	0	0	0	0	0
88	2110	-732.765	-23.7496	0	0	-497.015	-886.738	-587.086	0	-674.684	-10.0242	-2144.16	950.704	-4605.51	0	0	0	0	0	0
89	2111	-723.509	-21.9227	0	0	-507.704	-886.738	-587.415	0	-676.491	-10.0242	-2144.16	950.704	-4607.26	0	0	0	0	0	0
90	2112	-714.384	-20.0958	0	0	-518.392	-886.738	-587.743	0	-678.299	-10.0242	-2144.16	950.704	-4609.13	0	0	0	0	0	0
91	2113	-705.386	-18.2689	0	0	-529.081	-886.738	-588.072	0	-680.106	-10.0242	-2144.16	950.704	-4611.13	0	0	0	0	0	0
92	2114	-696.516	-16.442	0	0	-539.769	-886.738	-588.401	0	-681.914	-10.0242	-2144.16	950.704	-4613.26	0	0	0	0	0	0
93	2115	-687.771	-14.6151	0	0	-550.458	-886.738	-588.73	0	-683.721	-10.0242	-2144.16	950.704	-4615.51	0	0	0	0	0	0
94	2116	-679.149	-12.7882	0	0	-561.146	-886.738	-589.059	0	-685.529	-10.0242	-2144.16	950.704	-4617.88	0	0	0	0	0	0
95	2117	-670.649	-10.9613	0	0	-571.835	-886.738	-589.388	0	-687.336	-10.0242	-2144.16	950.704	-4620.38	0	0	0	0	0	0
96	2118	-662.269	-9.13444	0	0	-582.523	-886.738	-589.717	0	-689.144	-10.0242	-2144.16	950.704	-4623	0	0	0	0	0	0
97	2119	-654.007	-7.30756	0	0	-593.212	-886.738	-590.046	0	-690.951	-10.0242	-2144.16	950.704	-4625.74	0	0	0	0	0	0
98	2120	-645.862	-5.48067	0	0	-603.9	-886.738	-590.375	0	-692.759	-10.0242	-2144.16	950.704	-4628.59	0	0	0	0	0	0
99	2121	-637.832	-3.65378	0	0	-603.9	-886.738	-590.375	0	-692.759	-10.0242	-2144.16	950.704	-4618.73	0	0	0	0	0	0
100	2122	-629.916	-1.82689	0	0	-603.9	-886.738	-590.375	0	-692.759	-10.0242	-2144.16	950.704	-4608.99	0	0	0	0	0	0

## Sheet: MH (2)
HWP Module Master - Main Harvest (Eire BAU)
Numbers in table are shown as accumulation (or decay) over 100 years. Year 1 is the year of harvest. Decarbonisation factors have been applied. Units are in Mg CO2e. Reference flow is biomass containing 1000 Mg C (or 3666.7 Mg CO2e).
														Reference flow (biomass containing 1000Mg C)	Actual flow
		C storage - HWPs:		C storage - BECCS:			Avoided emissions:						Process emissions:	Total																						TOTAL:
		HWP - primary + recycled	HWP - mulch	BECCS - Biogenic C emissions primary - electricity	BECCS - Biogenic C emissions primary - heat	BECCS - Biogenic C emissions primary waste + secondary waste (electricity only)	Avoided emissions - FF (primary electricity, biomass+incineration)	Avoided emissions - FF (secondary electricity, biomass+incineration)	Avoided emissions - FF (biomass, heat)	Avoided emissions - FF (incineration, electricity)	Avoided emissions - FF (incineration, heat)	Avoided emissions - concrete	Primary process emissions	Total	Total (non-ref)	HWP C storage	BECCS C stroage	Avoided emissions	Process emisisons	(Total check)
Year	Year
1	2023													0
2	2024	-2418.52	-182.689	0	0	0	-886.738	-51.3289	0	-14.2322	-0.171354	-2144.16	950.704	-4747.13	-340494	-186575	0	-222109	68190.5	-340494
3	2025	-2386.65	-180.862	0	0	0	-886.738	-102.658	0	-28.4644	-0.342707	-2144.16	950.704	-4779.17	-342792	-184158	0	-226824	68190.5	-342792
4	2026	-2317.41	-179.035	0	0	0	-886.738	-153.987	0	-42.6965	-0.514061	-2144.16	950.704	-4773.83	-342409	-179060	0	-231539	68190.5	-342409
5	2027	-2258.38	-177.208	0	0	0	-886.738	-205.316	0	-56.9287	-0.685415	-2144.16	950.704	-4778.71	-342759	-174696	0	-236254	68190.5	-342759
6	2028	-2207.25	-175.381	0	0	0	-886.738	-227.027	0	-71.1609	-0.856768	-2144.16	950.704	-4761.87	-341551	-170897	0	-238844	68190.5	-341551
7	2029	-2162.25	-173.554	0	0	0	-886.738	-248.737	0	-85.3931	-1.02812	-2144.16	950.704	-4751.15	-340782	-167538	0	-241434	68190.5	-340782
8	2030	-2122	-171.728	0	0	-1.06885	-886.738	-268.553	0	-98.3828	-1.19948	-2144.16	950.704	-4743.12	-340206	-164520	-76.6646	-243800	68190.5	-340206
9	2031	-2085.46	-169.901	0	0	-2.1377	-886.738	-288.368	0	-111.373	-1.37083	-2144.16	950.704	-4738.8	-339896	-161768	-153.329	-246165	68190.5	-339896
10	2032	-2051.81	-168.074	0	0	-3.20655	-886.738	-308.184	0	-124.362	-1.54218	-2144.16	950.704	-4737.37	-339794	-159224	-229.994	-248530	68190.5	-339794
11	2033	-2020.45	-166.247	0	0	-4.2754	-886.738	-318.26	0	-137.352	-1.71354	-2144.16	950.704	-4728.49	-339157	-156843	-306.658	-250197	68190.5	-339157
12	2034	-1990.89	-164.42	0	0	-5.34425	-886.738	-328.336	0	-150.342	-1.88489	-2144.16	950.704	-4721.41	-338649	-154592	-383.323	-251864	68190.5	-338649
13	2035	-1962.77	-162.593	0	0	-6.4131	-886.738	-338.412	0	-163.331	-2.05624	-2144.16	950.704	-4715.76	-338244	-152444	-459.988	-253530	68190.5	-338244
14	2036	-1935.81	-160.766	0	0	-7.48195	-886.738	-348.488	0	-176.321	-2.2276	-2144.16	950.704	-4711.28	-337923	-150379	-536.652	-255197	68190.5	-337923
15	2037	-1909.79	-158.939	0	0	-8.5508	-886.738	-358.565	0	-189.311	-2.39895	-2144.16	950.704	-4707.74	-337669	-148382	-613.317	-256864	68190.5	-337669
16	2038	-1884.55	-157.112	0	0	-9.61965	-886.738	-368.641	0	-202.301	-2.5703	-2144.16	950.704	-4704.98	-337471	-146441	-689.981	-258530	68190.5	-337471
17	2039	-1859.96	-155.286	0	0	-10.6885	-886.738	-378.717	0	-215.29	-2.74166	-2144.16	950.704	-4702.87	-337319	-144546	-766.646	-260197	68190.5	-337319
18	2040	-1835.92	-153.459	0	0	-12.8262	-886.738	-387.829	0	-227.037	-2.91301	-2144.16	950.704	-4700.18	-337126	-142691	-919.975	-261706	68190.5	-337126
19	2041	-1812.36	-151.632	0	0	-14.9639	-886.738	-396.941	0	-238.785	-3.08437	-2144.16	950.704	-4697.95	-336967	-140870	-1073.3	-263214	68190.5	-336967
20	2042	-1789.21	-149.805	0	0	-17.1016	-886.738	-406.054	0	-250.532	-3.25572	-2144.16	950.704	-4696.15	-336837	-139079	-1226.63	-264723	68190.5	-336837
21	2043	-1766.44	-147.978	0	0	-19.2393	-886.738	-410.619	0	-262.279	-3.42707	-2144.16	950.704	-4690.17	-336409	-137314	-1379.96	-265905	68190.5	-336409
22	2044	-1744.01	-146.151	0	0	-21.377	-886.738	-415.184	0	-274.026	-3.59843	-2144.16	950.704	-4684.53	-336004	-135574	-1533.29	-267087	68190.5	-336004
23	2045	-1722.43	-144.324	0	0	-23.5147	-886.738	-419.749	0	-285.774	-3.76978	-2144.16	950.704	-4679.75	-335661	-133896	-1686.62	-268270	68190.5	-335661
24	2046	-1700.59	-142.497	0	0	-25.6524	-886.738	-424.314	0	-297.521	-3.94113	-2144.16	950.704	-4674.7	-335299	-132198	-1839.95	-269452	68190.5	-335299
25	2047	-1679.02	-140.67	0	0	-27.7901	-886.738	-428.879	0	-309.268	-4.11249	-2144.16	950.704	-4669.93	-334956	-130519	-1993.28	-270634	68190.5	-334956
26	2048	-1657.71	-138.844	0	0	-29.9278	-886.738	-433.444	0	-321.015	-4.28384	-2144.16	950.704	-4665.42	-334633	-128860	-2146.61	-271816	68190.5	-334633
27	2049	-1636.66	-137.017	0	0	-32.0655	-886.738	-438.009	0	-332.763	-4.45519	-2144.16	950.704	-4661.16	-334328	-127219	-2299.94	-272999	68190.5	-334328
28	2050	-1615.86	-135.19	0	0	-37.4097	-886.738	-441.126	0	-340.783	-4.60941	-2144.16	950.704	-4655.17	-333898	-125596	-2683.26	-273809	68190.5	-333898
29	2051	-1595.3	-133.363	0	0	-42.754	-886.738	-444.242	0	-348.802	-4.76363	-2144.16	950.704	-4649.41	-333485	-123990	-3066.58	-274618	68190.5	-333485
30	2052	-1574.97	-131.536	0	0	-48.0982	-886.738	-447.359	0	-356.822	-4.91785	-2144.16	950.704	-4643.89	-333089	-122401	-3449.91	-275428	68190.5	-333089
31	2053	-1554.88	-129.709	0	0	-53.4425	-886.738	-450.475	0	-364.842	-5.07207	-2144.16	950.704	-4638.61	-332710	-120829	-3833.23	-276238	68190.5	-332710
32	2054	-1535.01	-127.882	0	0	-58.7867	-886.738	-453.592	0	-372.862	-5.22629	-2144.16	950.704	-4633.55	-332347	-119273	-4216.55	-277048	68190.5	-332347
33	2055	-1515.38	-126.055	0	0	-64.131	-886.738	-456.709	0	-380.882	-5.3805	-2144.16	950.704	-4628.73	-332001	-117734	-4599.88	-277858	68190.5	-332001
34	2056	-1495.97	-124.228	0	0	-69.4752	-886.738	-459.825	0	-388.902	-5.53472	-2144.16	950.704	-4624.12	-331671	-116211	-4983.2	-278668	68190.5	-331671
35	2057	-1476.78	-122.402	0	0	-74.8195	-886.738	-462.942	0	-396.921	-5.68894	-2144.16	950.704	-4619.75	-331357	-114704	-5366.52	-279477	68190.5	-331357
36	2058	-1457.82	-120.575	0	0	-80.1637	-886.738	-466.058	0	-404.941	-5.84316	-2144.16	950.704	-4615.59	-331059	-113212	-5749.84	-280287	68190.5	-331059
37	2059	-1439.08	-118.748	0	0	-85.508	-886.738	-469.175	0	-412.961	-5.99738	-2144.16	950.704	-4611.66	-330777	-111737	-6133.17	-281097	68190.5	-330777
38	2060	-1420.56	-116.921	0	0	-90.8522	-886.738	-472.291	0	-420.981	-6.1516	-2144.16	950.704	-4607.94	-330510	-110277	-6516.49	-281907	68190.5	-330510
39	2061	-1402.25	-115.094	0	0	-96.1965	-886.738	-475.408	0	-429.001	-6.30581	-2144.16	950.704	-4604.45	-330260	-108834	-6899.81	-282717	68190.5	-330260
40	2062	-1384.17	-113.267	0	0	-101.541	-886.738	-478.524	0	-437.021	-6.46003	-2144.16	950.704	-4601.17	-330025	-107405	-7283.14	-283527	68190.5	-330025
41	2063	-1366.3	-111.44	0	0	-106.885	-886.738	-481.641	0	-445.04	-6.61425	-2144.16	950.704	-4598.11	-329805	-105993	-7666.46	-284336	68190.5	-329805
42	2064	-1348.64	-109.613	0	0	-112.229	-886.738	-484.758	0	-453.06	-6.76847	-2144.16	950.704	-4595.26	-329601	-104595	-8049.78	-285146	68190.5	-329601
43	2065	-1331.2	-107.786	0	0	-117.573	-886.738	-487.874	0	-461.08	-6.92269	-2144.16	950.704	-4592.63	-329412	-103213	-8433.1	-285956	68190.5	-329412
44	2066	-1313.97	-105.96	0	0	-122.918	-886.738	-490.991	0	-469.1	-7.07691	-2144.16	950.704	-4590.21	-329238	-101846	-8816.43	-286766	68190.5	-329238
45	2067	-1296.96	-104.133	0	0	-128.262	-886.738	-494.107	0	-477.12	-7.23112	-2144.16	950.704	-4588	-329080	-100495	-9199.75	-287576	68190.5	-329080
46	2068	-1280.15	-102.306	0	0	-133.606	-886.738	-497.224	0	-485.14	-7.38534	-2144.16	950.704	-4586	-328937	-99158.4	-9583.07	-288386	68190.5	-328937
47	2069	-1263.55	-100.479	0	0	-138.95	-886.738	-500.34	0	-493.159	-7.53956	-2144.16	950.704	-4584.21	-328808	-97836.9	-9966.4	-289195	68190.5	-328808
48	2070	-1247.16	-98.652	0	0	-144.295	-886.738	-503.457	0	-501.179	-7.69378	-2144.16	950.704	-4582.63	-328695	-96530.3	-10349.7	-290005	68190.5	-328695
49	2071	-1230.98	-96.8251	0	0	-149.639	-886.738	-506.573	0	-509.199	-7.848	-2144.16	950.704	-4581.25	-328596	-95238.4	-10733	-290815	68190.5	-328596
50	2072	-1215	-94.9982	0	0	-154.983	-886.738	-509.69	0	-517.219	-8.00221	-2144.16	950.704	-4580.08	-328512	-93961.2	-11116.4	-291625	68190.5	-328512
51	2073	-1199.22	-93.1713	0	0	-160.327	-886.738	-511.15	0	-525.239	-8.15643	-2144.16	950.704	-4577.46	-328324	-92698.6	-11499.7	-292316	68190.5	-328324
52	2074	-1183.65	-91.3444	0	0	-165.672	-886.738	-512.609	0	-533.259	-8.31065	-2144.16	950.704	-4575.03	-328150	-91450.4	-11883	-293007	68190.5	-328150
53	2075	-1168.27	-89.5176	0	0	-171.016	-886.738	-514.069	0	-541.278	-8.46487	-2144.16	950.704	-4572.81	-327990	-90216.6	-12266.3	-293698	68190.5	-327990
54	2076	-1153.1	-87.6907	0	0	-176.36	-886.738	-515.528	0	-549.298	-8.61909	-2144.16	950.704	-4570.78	-327845	-88996.9	-12649.7	-294389	68190.5	-327845
55	2077	-1138.12	-85.8638	0	0	-181.704	-886.738	-516.988	0	-557.318	-8.77331	-2144.16	950.704	-4568.95	-327714	-87791.4	-13033	-295080	68190.5	-327714
56	2078	-1123.33	-84.0369	0	0	-187.049	-886.738	-518.447	0	-565.338	-8.92752	-2144.16	950.704	-4567.32	-327597	-86599.9	-13416.3	-295771	68190.5	-327597
57	2079	-1108.74	-82.21	0	0	-192.393	-886.738	-519.907	0	-573.358	-9.08174	-2144.16	950.704	-4565.88	-327493	-85422.2	-13799.6	-296462	68190.5	-327493
58	2080	-1094.34	-80.3831	0	0	-197.737	-886.738	-521.366	0	-581.378	-9.23596	-2144.16	950.704	-4564.63	-327403	-84258.2	-14182.9	-297153	68190.5	-327403
59	2081	-1080.12	-78.5562	0	0	-203.081	-886.738	-522.826	0	-589.397	-9.39018	-2144.16	950.704	-4563.57	-327327	-83107.8	-14566.3	-297844	68190.5	-327327
60	2082	-1066.1	-76.7293	0	0	-208.426	-886.738	-524.285	0	-597.417	-9.5444	-2144.16	950.704	-4562.69	-327265	-81971	-14949.6	-298535	68190.5	-327265
61	2083	-1052.26	-74.9024	0	0	-213.77	-886.738	-525.745	0	-605.437	-9.69862	-2144.16	950.704	-4562.01	-327216	-80847.4	-15332.9	-299226	68190.5	-327216
62	2084	-1038.61	-73.0756	0	0	-219.114	-886.738	-527.204	0	-613.457	-9.85283	-2144.16	950.704	-4561.5	-327180	-79737.1	-15716.2	-299917	68190.5	-327180
63	2085	-1025.14	-71.2487	0	0	-229.803	-886.738	-527.533	0	-615.264	-9.85283	-2144.16	950.704	-4559.03	-327002	-78639.9	-16482.9	-300070	68190.5	-327002
64	2086	-1011.85	-69.4218	0	0	-240.491	-886.738	-527.862	0	-617.072	-9.85283	-2144.16	950.704	-4556.74	-326838	-77555.6	-17249.5	-300223	68190.5	-326838
65	2087	-998.739	-67.5949	0	0	-251.18	-886.738	-528.191	0	-618.879	-9.85283	-2144.16	950.704	-4554.63	-326686	-76484.1	-18016.2	-300376	68190.5	-326686
66	2088	-985.804	-65.768	0	0	-261.868	-886.738	-528.52	0	-620.687	-9.85283	-2144.16	950.704	-4552.69	-326547	-75425.3	-18782.8	-300530	68190.5	-326547
67	2089	-973.045	-63.9411	0	0	-272.557	-886.738	-528.849	0	-622.494	-9.85283	-2144.16	950.704	-4550.93	-326421	-74379.1	-19549.5	-300683	68190.5	-326421
68	2090	-960.458	-62.1142	0	0	-283.245	-886.738	-529.178	0	-624.302	-9.85283	-2144.16	950.704	-4549.34	-326307	-73345.3	-20316.1	-300836	68190.5	-326307
69	2091	-948.043	-60.2873	0	0	-293.934	-886.738	-529.507	0	-626.109	-9.85283	-2144.16	950.704	-4547.92	-326205	-72323.8	-21082.8	-300989	68190.5	-326205
70	2092	-935.797	-58.4604	0	0	-304.622	-886.738	-529.836	0	-627.917	-9.85283	-2144.16	950.704	-4546.67	-326116	-71314.4	-21849.4	-301143	68190.5	-326116
71	2093	-923.718	-56.6336	0	0	-315.311	-886.738	-530.165	0	-629.724	-9.85283	-2144.16	950.704	-4545.59	-326038	-70317	-22616.1	-301296	68190.5	-326038
72	2094	-911.805	-54.8067	0	0	-325.999	-886.738	-530.494	0	-631.532	-9.85283	-2144.16	950.704	-4544.68	-325973	-69331.4	-23382.7	-301449	68190.5	-325973
73	2095	-900.055	-52.9798	0	0	-336.688	-886.738	-530.823	0	-633.339	-9.85283	-2144.16	950.704	-4543.93	-325919	-68357.6	-24149.3	-301602	68190.5	-325919
74	2096	-888.467	-51.1529	0	0	-347.376	-886.738	-531.151	0	-635.147	-9.85283	-2144.16	950.704	-4543.34	-325877	-67395.4	-24916	-301756	68190.5	-325877
75	2097	-877.039	-49.326	0	0	-358.065	-886.738	-531.48	0	-636.954	-9.85283	-2144.16	950.704	-4542.91	-325846	-66444.7	-25682.6	-301909	68190.5	-325846
76	2098	-865.769	-47.4991	0	0	-368.753	-886.738	-531.809	0	-638.762	-9.85283	-2144.16	950.704	-4542.63	-325826	-65505.3	-26449.3	-302062	68190.5	-325826
77	2099	-854.654	-45.6722	0	0	-379.442	-886.738	-532.138	0	-640.569	-9.85283	-2144.16	950.704	-4542.52	-325818	-64577	-27215.9	-302215	68190.5	-325818
78	2100	-843.694	-43.8453	0	0	-390.13	-886.738	-532.467	0	-642.377	-9.85283	-2144.16	950.704	-4542.56	-325820	-63659.9	-27982.6	-302369	68190.5	-325820
79	2101	-832.886	-42.0184	0	0	-400.819	-886.738	-532.796	0	-644.184	-9.85283	-2144.16	950.704	-4542.75	-325834	-62753.6	-28749.2	-302522	68190.5	-325834
80	2102	-822.228	-40.1916	0	0	-411.507	-886.738	-533.125	0	-645.992	-9.85283	-2144.16	950.704	-4543.09	-325859	-61858.1	-29515.9	-302675	68190.5	-325859
81	2103	-811.718	-38.3647	0	0	-422.196	-886.738	-533.454	0	-647.799	-9.85283	-2144.16	950.704	-4543.57	-325894	-60973.3	-30282.5	-302828	68190.5	-325894
82	2104	-801.356	-36.5378	0	0	-432.884	-886.738	-533.783	0	-649.607	-9.85283	-2144.16	950.704	-4544.21	-325939	-60098.9	-31049.2	-302981	68190.5	-325939
83	2105	-791.137	-34.7109	0	0	-443.573	-886.738	-534.112	0	-651.414	-9.85283	-2144.16	950.704	-4544.99	-325995	-59235	-31815.8	-303135	68190.5	-325995
84	2106	-781.062	-32.884	0	0	-454.261	-886.738	-534.441	0	-653.222	-9.85283	-2144.16	950.704	-4545.91	-326061	-58381.3	-32582.4	-303288	68190.5	-326061
85	2107	-771.128	-31.0571	0	0	-464.95	-886.738	-534.77	0	-655.029	-9.85283	-2144.16	950.704	-4546.98	-326138	-57537.7	-33349.1	-303441	68190.5	-326138
86	2108	-761.333	-29.2302	0	0	-475.638	-886.738	-535.099	0	-656.837	-9.85283	-2144.16	950.704	-4548.18	-326224	-56704.1	-34115.7	-303594	68190.5	-326224
87	2109	-751.675	-27.4033	0	0	-486.327	-886.738	-535.428	0	-658.644	-9.85283	-2144.16	950.704	-4549.52	-326320	-55880.4	-34882.4	-303748	68190.5	-326320
88	2110	-742.153	-25.5764	0	0	-497.015	-886.738	-535.757	0	-660.452	-9.85283	-2144.16	950.704	-4551	-326426	-55066.4	-35649	-303901	68190.5	-326426
89	2111	-732.765	-23.7496	0	0	-507.704	-886.738	-536.086	0	-662.259	-9.85283	-2144.16	950.704	-4552.61	-326541	-54262	-36415.7	-304054	68190.5	-326541
90	2112	-723.509	-21.9227	0	0	-518.392	-886.738	-536.415	0	-664.067	-9.85283	-2144.16	950.704	-4554.35	-326666	-53467	-37182.3	-304207	68190.5	-326666
91	2113	-714.384	-20.0958	0	0	-529.081	-886.738	-536.744	0	-665.874	-9.85283	-2144.16	950.704	-4556.22	-326801	-52681.4	-37949	-304361	68190.5	-326801
92	2114	-705.386	-18.2689	0	0	-539.769	-886.738	-537.072	0	-667.682	-9.85283	-2144.16	950.704	-4558.22	-326944	-51905.1	-38715.6	-304514	68190.5	-326944
93	2115	-696.516	-16.442	0	0	-550.458	-886.738	-537.401	0	-669.489	-9.85283	-2144.16	950.704	-4560.35	-327097	-51137.8	-39482.3	-304667	68190.5	-327097
94	2116	-687.771	-14.6151	0	0	-561.146	-886.738	-537.73	0	-671.296	-9.85283	-2144.16	950.704	-4562.6	-327258	-50379.5	-40248.9	-304820	68190.5	-327258
95	2117	-679.149	-12.7882	0	0	-571.835	-886.738	-538.059	0	-673.104	-9.85283	-2144.16	950.704	-4564.98	-327429	-49630	-41015.6	-304974	68190.5	-327429
96	2118	-670.649	-10.9613	0	0	-582.523	-886.738	-538.388	0	-674.911	-9.85283	-2144.16	950.704	-4567.48	-327608	-48889.3	-41782.2	-305127	68190.5	-327608
97	2119	-662.269	-9.13444	0	0	-593.212	-886.738	-538.717	0	-676.719	-9.85283	-2144.16	950.704	-4570.09	-327796	-48157.2	-42548.8	-305280	68190.5	-327796
98	2120	-654.007	-7.30756	0	0	-603.9	-886.738	-539.046	0	-678.526	-9.85283	-2144.16	950.704	-4572.83	-327992	-47433.6	-43315.5	-305433	68190.5	-327992
99	2121	-645.862	-5.48067	0	0	-603.9	-886.738	-539.046	0	-678.526	-9.85283	-2144.16	950.704	-4562.86	-327277	-46718.4	-43315.5	-305433	68190.5	-327277
100	2122	-637.832	-3.65378	0	0	-603.9	-886.738	-539.046	0	-678.526	-9.85283	-2144.16	950.704	-4553	-326570	-46011.4	-43315.5	-305433	68190.5	-326570

## Sheet: MH (3)
HWP Module Master - Main Harvest (Eire BAU)
Numbers in table are shown as accumulation (or decay) over 100 years. Year 1 is the year of harvest. Decarbonisation factors have been applied. Units are in Mg CO2e. Reference flow is biomass containing 1000 Mg C (or 3666.7 Mg CO2e).
														Reference flow (biomass containing 1000Mg C)	Actual flow
		C storage - HWPs:		C storage - BECCS:			Avoided emissions:						Process emissions:	Total																						TOTAL:
		HWP - primary + recycled	HWP - mulch	BECCS - Biogenic C emissions primary - electricity	BECCS - Biogenic C emissions primary - heat	BECCS - Biogenic C emissions primary waste + secondary waste (electricity only)	Avoided emissions - FF (primary electricity, biomass+incineration)	Avoided emissions - FF (secondary electricity, biomass+incineration)	Avoided emissions - FF (biomass, heat)	Avoided emissions - FF (incineration, electricity)	Avoided emissions - FF (incineration, heat)	Avoided emissions - concrete	Primary process emissions	Total	Total (non-ref)	HWP C storage	BECCS C stroage	Avoided emissions	Process emisisons	(Total check)
Year	Year
1	2023													0	0	0	0	0	0	0
2	2024													0	0	0	0	0	0	0
3	2025	-2418.52	-182.689	0	0	0	-886.738	-51.3289	0	-14.2322	-0.171354	-2144.16	950.704	-4747.13	-66354.8	-36359.4	0	-43284.3	13288.8	-66354.8
4	2026	-2386.65	-180.862	0	0	0	-886.738	-102.658	0	-28.4644	-0.342707	-2144.16	950.704	-4779.17	-66802.6	-35888.3	0	-44203.1	13288.8	-66802.6
5	2027	-2317.41	-179.035	0	0	0	-886.738	-153.987	0	-42.6965	-0.514061	-2144.16	950.704	-4773.83	-66728	-34894.9	0	-45121.9	13288.8	-66728
6	2028	-2258.38	-177.208	0	0	0	-886.738	-175.698	0	-56.9287	-0.685415	-2144.16	950.704	-4749.09	-66382.2	-34044.3	0	-45626.7	13288.8	-66382.2
7	2029	-2207.25	-175.381	0	0	0	-886.738	-197.409	0	-71.1609	-0.856768	-2144.16	950.704	-4732.25	-66146.8	-33304.2	0	-46131.5	13288.8	-66146.8
8	2030	-2162.25	-173.554	0	0	-1.06885	-886.738	-217.224	0	-84.1506	-1.02812	-2144.16	950.704	-4719.46	-65968.1	-32649.6	-14.9403	-46592.4	13288.8	-65968.1
9	2031	-2122	-171.728	0	0	-2.1377	-886.738	-237.04	0	-97.1403	-1.19948	-2144.16	950.704	-4711.43	-65855.9	-32061.4	-29.8805	-47053.4	13288.8	-65855.9
10	2032	-2085.46	-169.901	0	0	-3.20655	-886.738	-256.855	0	-110.13	-1.37083	-2144.16	950.704	-4707.11	-65795.4	-31525.1	-44.8208	-47514.3	13288.8	-65795.4
11	2033	-2051.81	-168.074	0	0	-4.2754	-886.738	-266.931	0	-123.12	-1.54218	-2144.16	950.704	-4695.94	-65639.3	-31029.3	-59.761	-47839.1	13288.8	-65639.3
12	2034	-2020.45	-166.247	0	0	-5.34425	-886.738	-277.007	0	-136.109	-1.71354	-2144.16	950.704	-4687.06	-65515.1	-30565.4	-74.7013	-48163.9	13288.8	-65515.1
13	2035	-1990.89	-164.42	0	0	-6.4131	-886.738	-287.083	0	-149.099	-1.88489	-2144.16	950.704	-4679.98	-65416.2	-30126.6	-89.6415	-48488.7	13288.8	-65416.2
14	2036	-1962.77	-162.593	0	0	-7.48195	-886.738	-297.16	0	-162.089	-2.05624	-2144.16	950.704	-4674.34	-65337.3	-29708	-104.582	-48813.5	13288.8	-65337.3
15	2037	-1935.81	-160.766	0	0	-8.5508	-886.738	-307.236	0	-175.079	-2.2276	-2144.16	950.704	-4669.86	-65274.7	-29305.7	-119.522	-49138.3	13288.8	-65274.7
16	2038	-1909.79	-158.939	0	0	-9.61965	-886.738	-317.312	0	-188.068	-2.39895	-2144.16	950.704	-4666.32	-65225.2	-28916.5	-134.462	-49463.1	13288.8	-65225.2
17	2039	-1884.55	-157.112	0	0	-10.6885	-886.738	-327.388	0	-201.058	-2.5703	-2144.16	950.704	-4663.56	-65186.6	-28538.1	-149.403	-49787.9	13288.8	-65186.6
18	2040	-1859.96	-155.286	0	0	-12.8262	-886.738	-336.5	0	-212.805	-2.74166	-2144.16	950.704	-4660.31	-65141.2	-28168.9	-179.283	-50081.9	13288.8	-65141.2
19	2041	-1835.92	-153.459	0	0	-14.9639	-886.738	-345.613	0	-224.553	-2.91301	-2144.16	950.704	-4657.61	-65103.5	-27807.3	-209.164	-50375.9	13288.8	-65103.5
20	2042	-1812.36	-151.632	0	0	-17.1016	-886.738	-354.725	0	-236.3	-3.08437	-2144.16	950.704	-4655.39	-65072.5	-27452.4	-239.044	-50669.8	13288.8	-65072.5
21	2043	-1789.21	-149.805	0	0	-19.2393	-886.738	-359.29	0	-248.047	-3.25572	-2144.16	950.704	-4649.04	-64983.7	-27103.4	-268.925	-50900.3	13288.8	-64983.7
22	2044	-1766.44	-147.978	0	0	-21.377	-886.738	-363.855	0	-259.794	-3.42707	-2144.16	950.704	-4643.06	-64900.2	-26759.5	-298.805	-51130.7	13288.8	-64900.2
23	2045	-1744.01	-146.151	0	0	-23.5147	-886.738	-368.42	0	-271.542	-3.59843	-2144.16	950.704	-4637.42	-64821.3	-26420.4	-328.686	-51361.1	13288.8	-64821.3
24	2046	-1722.43	-144.324	0	0	-25.6524	-886.738	-372.985	0	-283.289	-3.76978	-2144.16	950.704	-4632.64	-64754.5	-26093.3	-358.566	-51591.5	13288.8	-64754.5
25	2047	-1700.59	-142.497	0	0	-27.7901	-886.738	-377.55	0	-295.036	-3.94113	-2144.16	950.704	-4627.59	-64683.9	-25762.4	-388.447	-51821.9	13288.8	-64683.9
26	2048	-1679.02	-140.67	0	0	-29.9278	-886.738	-382.115	0	-306.783	-4.11249	-2144.16	950.704	-4622.82	-64617.2	-25435.4	-418.327	-52052.3	13288.8	-64617.2
27	2049	-1657.71	-138.844	0	0	-32.0655	-886.738	-386.68	0	-318.53	-4.28384	-2144.16	950.704	-4618.31	-64554.1	-25112.1	-448.208	-52282.7	13288.8	-64554.1
28	2050	-1636.66	-137.017	0	0	-37.4097	-886.738	-389.797	0	-326.55	-4.43806	-2144.16	950.704	-4612.06	-64466.9	-24792.3	-522.909	-52440.5	13288.8	-64466.9
29	2051	-1615.86	-135.19	0	0	-42.754	-886.738	-392.913	0	-334.57	-4.59228	-2144.16	950.704	-4606.07	-64383.1	-24476	-597.61	-52598.3	13288.8	-64383.1
30	2052	-1595.3	-133.363	0	0	-48.0982	-886.738	-396.03	0	-342.59	-4.7465	-2144.16	950.704	-4600.31	-64302.6	-24163	-672.311	-52756.1	13288.8	-64302.6
31	2053	-1574.97	-131.536	0	0	-53.4425	-886.738	-399.146	0	-350.61	-4.90071	-2144.16	950.704	-4594.8	-64225.5	-23853.3	-747.013	-52914	13288.8	-64225.5
32	2054	-1554.88	-129.709	0	0	-58.7867	-886.738	-402.263	0	-358.63	-5.05493	-2144.16	950.704	-4589.51	-64151.6	-23546.9	-821.714	-53071.8	13288.8	-64151.6
33	2055	-1535.01	-127.882	0	0	-64.131	-886.738	-405.38	0	-366.649	-5.20915	-2144.16	950.704	-4584.46	-64081	-23243.8	-896.415	-53229.6	13288.8	-64081
34	2056	-1515.38	-126.055	0	0	-69.4752	-886.738	-408.496	0	-374.669	-5.36337	-2144.16	950.704	-4579.63	-64013.5	-22943.8	-971.116	-53387.4	13288.8	-64013.5
35	2057	-1495.97	-124.228	0	0	-74.8195	-886.738	-411.613	0	-382.689	-5.51759	-2144.16	950.704	-4575.03	-63949.2	-22646.9	-1045.82	-53545.2	13288.8	-63949.2
36	2058	-1476.78	-122.402	0	0	-80.1637	-886.738	-414.729	0	-390.709	-5.67181	-2144.16	950.704	-4570.65	-63888	-22353.2	-1120.52	-53703.1	13288.8	-63888
37	2059	-1457.82	-120.575	0	0	-85.508	-886.738	-417.846	0	-398.729	-5.82602	-2144.16	950.704	-4566.49	-63829.9	-22062.6	-1195.22	-53860.9	13288.8	-63829.9
38	2060	-1439.08	-118.748	0	0	-90.8522	-886.738	-420.962	0	-406.749	-5.98024	-2144.16	950.704	-4562.56	-63774.9	-21775.1	-1269.92	-54018.7	13288.8	-63774.9
39	2061	-1420.56	-116.921	0	0	-96.1965	-886.738	-424.079	0	-414.769	-6.13446	-2144.16	950.704	-4558.84	-63723	-21490.7	-1344.62	-54176.5	13288.8	-63723
40	2062	-1402.25	-115.094	0	0	-101.541	-886.738	-427.196	0	-422.788	-6.28868	-2144.16	950.704	-4555.35	-63674.1	-21209.3	-1419.32	-54334.3	13288.8	-63674.1
41	2063	-1384.17	-113.267	0	0	-106.885	-886.738	-430.312	0	-430.808	-6.4429	-2144.16	950.704	-4552.07	-63628.3	-20930.9	-1494.03	-54492.2	13288.8	-63628.3
42	2064	-1366.3	-111.44	0	0	-112.229	-886.738	-433.429	0	-438.828	-6.59711	-2144.16	950.704	-4549.01	-63585.5	-20655.6	-1568.73	-54650	13288.8	-63585.5
43	2065	-1348.64	-109.613	0	0	-117.573	-886.738	-436.545	0	-446.848	-6.75133	-2144.16	950.704	-4546.16	-63545.7	-20383.3	-1643.43	-54807.8	13288.8	-63545.7
44	2066	-1331.2	-107.786	0	0	-122.918	-886.738	-439.662	0	-454.868	-6.90555	-2144.16	950.704	-4543.53	-63508.9	-20114	-1718.13	-54965.6	13288.8	-63508.9
45	2067	-1313.97	-105.96	0	0	-128.262	-886.738	-442.778	0	-462.888	-7.05977	-2144.16	950.704	-4541.11	-63475.1	-19847.7	-1792.83	-55123.4	13288.8	-63475.1
46	2068	-1296.96	-104.133	0	0	-133.606	-886.738	-445.895	0	-470.907	-7.21399	-2144.16	950.704	-4538.9	-63444.2	-19584.3	-1867.53	-55281.2	13288.8	-63444.2
47	2069	-1280.15	-102.306	0	0	-138.95	-886.738	-449.011	0	-478.927	-7.36821	-2144.16	950.704	-4536.9	-63416.3	-19323.8	-1942.23	-55439.1	13288.8	-63416.3
48	2070	-1263.55	-100.479	0	0	-144.295	-886.738	-452.128	0	-486.947	-7.52242	-2144.16	950.704	-4535.11	-63391.3	-19066.3	-2016.93	-55596.9	13288.8	-63391.3
49	2071	-1247.16	-98.652	0	0	-149.639	-886.738	-455.245	0	-494.967	-7.67664	-2144.16	950.704	-4533.53	-63369.2	-18811.6	-2091.64	-55754.7	13288.8	-63369.2
50	2072	-1230.98	-96.8251	0	0	-154.983	-886.738	-458.361	0	-502.987	-7.83086	-2144.16	950.704	-4532.16	-63349.9	-18559.9	-2166.34	-55912.5	13288.8	-63349.9
51	2073	-1215	-94.9982	0	0	-160.327	-886.738	-459.821	0	-511.007	-7.98508	-2144.16	950.704	-4529.33	-63310.4	-18311	-2241.04	-56047.2	13288.8	-63310.4
52	2074	-1199.22	-93.1713	0	0	-165.672	-886.738	-461.28	0	-519.026	-8.1393	-2144.16	950.704	-4526.7	-63273.7	-18064.9	-2315.74	-56181.8	13288.8	-63273.7
53	2075	-1183.65	-91.3444	0	0	-171.016	-886.738	-462.74	0	-527.046	-8.29352	-2144.16	950.704	-4524.28	-63239.8	-17821.7	-2390.44	-56316.5	13288.8	-63239.8
54	2076	-1168.27	-89.5176	0	0	-176.36	-886.738	-464.199	0	-535.066	-8.44773	-2144.16	950.704	-4522.05	-63208.7	-17581.2	-2465.14	-56451.2	13288.8	-63208.7
55	2077	-1153.1	-87.6907	0	0	-181.704	-886.738	-465.659	0	-543.086	-8.60195	-2144.16	950.704	-4520.03	-63180.4	-17343.6	-2539.84	-56585.8	13288.8	-63180.4
56	2078	-1138.12	-85.8638	0	0	-187.049	-886.738	-467.118	0	-551.106	-8.75617	-2144.16	950.704	-4518.2	-63154.8	-17108.6	-2614.54	-56720.5	13288.8	-63154.8
57	2079	-1123.33	-84.0369	0	0	-192.393	-886.738	-468.578	0	-559.126	-8.91039	-2144.16	950.704	-4516.56	-63132	-16876.4	-2689.25	-56855.1	13288.8	-63132
58	2080	-1108.74	-82.21	0	0	-197.737	-886.738	-470.037	0	-567.145	-9.06461	-2144.16	950.704	-4515.12	-63111.8	-16646.9	-2763.95	-56989.8	13288.8	-63111.8
59	2081	-1094.34	-80.3831	0	0	-203.081	-886.738	-471.497	0	-575.165	-9.21883	-2144.16	950.704	-4513.87	-63094.3	-16420.1	-2838.65	-57124.4	13288.8	-63094.3
60	2082	-1080.12	-78.5562	0	0	-208.426	-886.738	-472.956	0	-583.185	-9.37304	-2144.16	950.704	-4512.81	-63079.5	-16195.9	-2913.35	-57259.1	13288.8	-63079.5
61	2083	-1066.1	-76.7293	0	0	-213.77	-886.738	-474.416	0	-591.205	-9.52726	-2144.16	950.704	-4511.94	-63067.3	-15974.3	-2988.05	-57393.7	13288.8	-63067.3
62	2084	-1052.26	-74.9024	0	0	-219.114	-886.738	-475.875	0	-599.225	-9.68148	-2144.16	950.704	-4511.25	-63057.7	-15755.4	-3062.75	-57528.4	13288.8	-63057.7
63	2085	-1038.61	-73.0756	0	0	-229.803	-886.738	-476.204	0	-601.032	-9.68148	-2144.16	950.704	-4508.6	-63020.6	-15539	-3212.15	-57558.3	13288.8	-63020.6
64	2086	-1025.14	-71.2487	0	0	-240.491	-886.738	-476.533	0	-602.84	-9.68148	-2144.16	950.704	-4506.12	-62986	-15325.2	-3361.56	-57588.1	13288.8	-62986
65	2087	-1011.85	-69.4218	0	0	-251.18	-886.738	-476.862	0	-604.647	-9.68148	-2144.16	950.704	-4503.83	-62954	-15113.9	-3510.96	-57618	13288.8	-62954
66	2088	-998.739	-67.5949	0	0	-261.868	-886.738	-477.191	0	-606.455	-9.68148	-2144.16	950.704	-4501.72	-62924.5	-14905.1	-3660.36	-57647.9	13288.8	-62924.5
67	2089	-985.804	-65.768	0	0	-272.557	-886.738	-477.52	0	-608.262	-9.68148	-2144.16	950.704	-4499.78	-62897.4	-14698.7	-3809.76	-57677.7	13288.8	-62897.4
68	2090	-973.045	-63.9411	0	0	-283.245	-886.738	-477.849	0	-610.07	-9.68148	-2144.16	950.704	-4498.02	-62872.8	-14494.9	-3959.17	-57707.6	13288.8	-62872.8
69	2091	-960.458	-62.1142	0	0	-293.934	-886.738	-478.178	0	-611.877	-9.68148	-2144.16	950.704	-4496.43	-62850.6	-14293.4	-4108.57	-57737.4	13288.8	-62850.6
70	2092	-948.043	-60.2873	0	0	-304.622	-886.738	-478.507	0	-613.685	-9.68148	-2144.16	950.704	-4495.02	-62830.8	-14094.3	-4257.97	-57767.3	13288.8	-62830.8
71	2093	-935.797	-58.4604	0	0	-315.311	-886.738	-478.836	0	-615.492	-9.68148	-2144.16	950.704	-4493.77	-62813.3	-13897.6	-4407.37	-57797.2	13288.8	-62813.3
72	2094	-923.718	-56.6336	0	0	-325.999	-886.738	-479.165	0	-617.3	-9.68148	-2144.16	950.704	-4492.69	-62798.2	-13703.2	-4556.78	-57827	13288.8	-62798.2
73	2095	-911.805	-54.8067	0	0	-336.688	-886.738	-479.494	0	-619.107	-9.68148	-2144.16	950.704	-4491.77	-62785.4	-13511.2	-4706.18	-57856.9	13288.8	-62785.4
74	2096	-900.055	-52.9798	0	0	-347.376	-886.738	-479.823	0	-620.915	-9.68148	-2144.16	950.704	-4491.02	-62774.9	-13321.4	-4855.58	-57886.8	13288.8	-62774.9
75	2097	-888.467	-51.1529	0	0	-358.065	-886.738	-480.152	0	-622.722	-9.68148	-2144.16	950.704	-4490.43	-62766.7	-13133.9	-5004.98	-57916.6	13288.8	-62766.7
76	2098	-877.039	-49.326	0	0	-368.753	-886.738	-480.48	0	-624.53	-9.68148	-2144.16	950.704	-4490	-62760.7	-12948.6	-5154.39	-57946.5	13288.8	-62760.7
77	2099	-865.769	-47.4991	0	0	-379.442	-886.738	-480.809	0	-626.337	-9.68148	-2144.16	950.704	-4489.73	-62756.9	-12765.5	-5303.79	-57976.3	13288.8	-62756.9
78	2100	-854.654	-45.6722	0	0	-390.13	-886.738	-481.138	0	-628.145	-9.68148	-2144.16	950.704	-4489.61	-62755.2	-12584.7	-5453.19	-58006.2	13288.8	-62755.2
79	2101	-843.694	-43.8453	0	0	-400.819	-886.738	-481.467	0	-629.952	-9.68148	-2144.16	950.704	-4489.65	-62755.8	-12405.9	-5602.59	-58036.1	13288.8	-62755.8
80	2102	-832.886	-42.0184	0	0	-411.507	-886.738	-481.796	0	-631.759	-9.68148	-2144.16	950.704	-4489.84	-62758.4	-12229.3	-5752	-58065.9	13288.8	-62758.4
81	2103	-822.228	-40.1916	0	0	-422.196	-886.738	-482.125	0	-633.567	-9.68148	-2144.16	950.704	-4490.18	-62763.2	-12054.8	-5901.4	-58095.8	13288.8	-62763.2
82	2104	-811.718	-38.3647	0	0	-432.884	-886.738	-482.454	0	-635.374	-9.68148	-2144.16	950.704	-4490.67	-62770	-11882.4	-6050.8	-58125.7	13288.8	-62770
83	2105	-801.356	-36.5378	0	0	-443.573	-886.738	-482.783	0	-637.182	-9.68148	-2144.16	950.704	-4491.3	-62778.9	-11712	-6200.2	-58155.5	13288.8	-62778.9
84	2106	-791.137	-34.7109	0	0	-454.261	-886.738	-483.112	0	-638.989	-9.68148	-2144.16	950.704	-4492.08	-62789.8	-11543.6	-6349.61	-58185.4	13288.8	-62789.8
85	2107	-781.062	-32.884	0	0	-464.95	-886.738	-483.441	0	-640.797	-9.68148	-2144.16	950.704	-4493	-62802.7	-11377.2	-6499.01	-58215.2	13288.8	-62802.7
86	2108	-771.128	-31.0571	0	0	-475.638	-886.738	-483.77	0	-642.604	-9.68148	-2144.16	950.704	-4494.07	-62817.5	-11212.8	-6648.41	-58245.1	13288.8	-62817.5
87	2109	-761.333	-29.2302	0	0	-486.327	-886.738	-484.099	0	-644.412	-9.68148	-2144.16	950.704	-4495.27	-62834.4	-11050.4	-6797.81	-58275	13288.8	-62834.4
88	2110	-751.675	-27.4033	0	0	-497.015	-886.738	-484.428	0	-646.219	-9.68148	-2144.16	950.704	-4496.61	-62853.1	-10889.9	-6947.22	-58304.8	13288.8	-62853.1
89	2111	-742.153	-25.5764	0	0	-507.704	-886.738	-484.757	0	-648.027	-9.68148	-2144.16	950.704	-4498.09	-62873.7	-10731.2	-7096.62	-58334.7	13288.8	-62873.7
90	2112	-732.765	-23.7496	0	0	-518.392	-886.738	-485.086	0	-649.834	-9.68148	-2144.16	950.704	-4499.7	-62896.2	-10574.5	-7246.02	-58364.6	13288.8	-62896.2
91	2113	-723.509	-21.9227	0	0	-529.081	-886.738	-485.415	0	-651.642	-9.68148	-2144.16	950.704	-4501.44	-62920.6	-10419.6	-7395.42	-58394.4	13288.8	-62920.6
92	2114	-714.384	-20.0958	0	0	-539.769	-886.738	-485.744	0	-653.449	-9.68148	-2144.16	950.704	-4503.31	-62946.7	-10266.5	-7544.83	-58424.3	13288.8	-62946.7
93	2115	-705.386	-18.2689	0	0	-550.458	-886.738	-486.072	0	-655.257	-9.68148	-2144.16	950.704	-4505.31	-62974.7	-10115.2	-7694.23	-58454.2	13288.8	-62974.7
94	2116	-696.516	-16.442	0	0	-561.146	-886.738	-486.401	0	-657.064	-9.68148	-2144.16	950.704	-4507.44	-63004.5	-9965.64	-7843.63	-58484	13288.8	-63004.5
95	2117	-687.771	-14.6151	0	0	-571.835	-886.738	-486.73	0	-658.872	-9.68148	-2144.16	950.704	-4509.69	-63035.9	-9817.86	-7993.03	-58513.9	13288.8	-63035.9
96	2118	-679.149	-12.7882	0	0	-582.523	-886.738	-487.059	0	-660.679	-9.68148	-2144.16	950.704	-4512.07	-63069.2	-9671.81	-8142.44	-58543.7	13288.8	-63069.2
97	2119	-670.649	-10.9613	0	0	-593.212	-886.738	-487.388	0	-662.487	-9.68148	-2144.16	950.704	-4514.57	-63104.1	-9527.46	-8291.84	-58573.6	13288.8	-63104.1
98	2120	-662.269	-9.13444	0	0	-603.9	-886.738	-487.717	0	-664.294	-9.68148	-2144.16	950.704	-4517.19	-63140.7	-9384.79	-8441.24	-58603.5	13288.8	-63140.7
99	2121	-654.007	-7.30756	0	0	-603.9	-886.738	-487.717	0	-664.294	-9.68148	-2144.16	950.704	-4507.1	-62999.6	-9243.77	-8441.24	-58603.5	13288.8	-62999.6
100	2122	-645.862	-5.48067	0	0	-603.9	-886.738	-487.717	0	-664.294	-9.68148	-2144.16	950.704	-4497.13	-62860.3	-9104.39	-8441.24	-58603.5	13288.8	-62860.3

[truncated: 98 more sheets: MH (4), MH (5), MH (6), MH (7), MH (8), MH (9), MH (10), MH (11), MH (12), MH (13), MH (14), MH (15), MH (16), MH (17), MH (18), MH (19), MH (20), MH (21), MH (22), MH (23) …]
