# Supplementary material for: Can temperate forests deliver both future wood demand and climate-change mitigation?
Source: Research Square preprint supplement (doi:10.21203/rs.3.rs-3681726/v1), 2023-12-14
Supplement: Supplementary file 2 [file 3c4a7e451ef36e55f36b954b.xlsx]

## Sheet: Intro
Supplementary_Data_3 - Results calculations
We have provided a description of each of the worksheets to facilitate navigation of the workbook and to follow calculations linking worksheets. We hope this helps.
	Description of worksheets:
Results graphs	Summarises results of the results data in the proceeding four sheets. (Fig. 2&3 in manuscript)
Total_impact_hi (Aff50yrs)	Results: Net GWP impact of high wood demand, for all modelled scenarios (high and low forest expansion), with 50-year afforestation duration
Total_impact_lo (Aff50yrs)	Results: Net GWP impact of low wood demand, for all modelled scenarios (high and low forest expansion), with 50-year afforestation duration
Total_impact_hi (Aff35yrs)	Results: Net GWP impact of high wood demand, for all modelled scenarios (high and low forest expansion), with 35-year afforestation duration
Total_impact_lo (Aff35yrs)	Results: Net GWP impact of low wood demand, for all modelled scenarios (high and low forest expansion), with 35-year afforestation duration
Marg_imps_all_m3	Summarises ‘Overseas forest C storage’ GWP impact expressed per m3 of marginal imported wood supply. (Fig. 4 in manuscript)
Tropical_Aff(50yrs)	Calculation sheet for tropical afforestation (presented in Fig. 4 in manuscript)
Marg_imps_all_avg	Summarises the results of the proceeding sheets. (Used in results calculation sheets listed in rows 7-10 above).
Marg_imp_hi_bor (Aff50yrs)	Calculates the 'overseas forest C impact' from 'Boreal 1, Boreal 2 and Boreal 3' components for high wood demand, for all modelled scenarios (high and low forest expansion), 50-year afforestation duration
Marg_imp_hi_trop (Aff50yrs)	Calculates the 'overseas forest C impact' from 'Tropical' components for high wood demand, for all modelled scenarios (high and low forest expansion), 50-year afforestation duration
Marg_imp_hi_bor (Aff35yrs)	Calculates the 'overseas forest C impact' from 'Boreal 1, Boreal 2 and Boreal 3' components for high wood demand, for all modelled scenarios (high and low forest expansion), 35-year afforestation duration
Marg_imp_hi_trop (Aff35yrs)	Calculates the 'overseas forest C impact' from 'Tropical' components for high wood demand, for all modelled scenarios (high and low forest expansion), 35-year afforestation duration
Marg_imp_lo_bor (Aff50yrs)	Calculates the 'overseas forest C impact' from 'Boreal 1, Boreal 2 and Boreal 3' components for low wood demand, for all modelled scenarios (high and low forest expansion), 50-year afforestation duration
Marg_imp_lo_trop (Aff50yrs)	Calculates the 'overseas forest C impact' from 'Tropical' components for low wood demand, for all modelled scenarios (high and low forest expansion), 50-year afforestation duration
Marg_imp_lo_bor (Aff35yrs)	Calculates the 'overseas forest C impact' from 'Boreal 1, Boreal 2 and Boreal 3' components for low wood demand, for all modelled scenarios (high and low forest expansion), 35-year afforestation duration
Marg_imp_lo_trop (Aff35yrs)	Calculates the 'overseas forest C impact' from 'Tropical' components for low wood demand, for all modelled scenarios (high and low forest expansion), 35-year afforestation duration
IRW_supply_demand_graphs (2)	Summarises the the supply-demand balance for all modelled scenarios in chart (Fig. 1 in the manuscript) for the proceeding two sheets.
IRW_supply_demand (Aff50yrs)	Calculates the supply-demand balance for all modelled scenarios, with 50-year afforestation duration.
IRW_supply_demand (Aff35yrs)	Calculates the supply-demand balance for all modelled scenarios, with 35-year afforestation duration.
Results_graphs (Aff50yrs)	Summarises/aggregates data from 'Forest_C_impact_all' and 'HWP_impact_all', for 50-year afforestation duration scenarios. Not used in the manuscript - can be ignored.
Results_graphs (Aff35yrs)	Summarises/aggreates data from 'Forest_C_impact_all' and 'HWP_impact_all', for 50-year afforestation duration scenarios. Not used in the manuscript - can be ignored.
Forest&HWP_impact_(Aff50yrs)	Summarises/aggreates data from 'Forest_C_impact_all' and 'HWP_impact_all', for 50-year afforestation duration scenarios. Not used in the manuscript - can be ignored.
Forest&HWP_impact_(Aff35yrs)	Summarises/aggreates data from 'Forest_C_impact_all' and 'HWP_impact_all', for 50-year afforestation duration scenarios. Not used in the manuscript - can be ignored.
Forest_C_impact_all	Existing and new forest C modelling - Calculated in CBM-CFS3 and imported into this spreadsheet
HWP_impact_all	HWP GWP impacts for all modelled scenarios. (Summarises the proceeding worksheets. Note that these data are calculated in Supplementary_Data_2) (HWP calculation file) and pasted into these worksheets.
50_35	Existing forest, 50-year rotation (reference-rotation), replanted with higher productivity, 35-year rotation on harvesting
50_45	Existing forest, 50-year rotation (reference-rotation), shortened to 45-year rotation
50_50	Existing forest, 50-year rotation throughout the model period
50_55	Existing forest, 50-year rotation (reference-rotation), lenthened to 55-year rotation
Aff35 (35yrs)	New forest, 'higher productivity' (with 35-year rotation), with 35-year afforestation duration
Aff45 (35yrs)	New forest, 'shortened-rotation' (i.e. to 45-year), with 35-year afforestation duration
Aff50 (35yrs)	New forest, 'reference-rotation' (i.e. 50-year), with 35-year afforestation duration
Aff55 (35yrs)	New forest, 'lengthened-rotation' (i.e. to 55-year), with 35-year afforestation duration
Aff35 (50yrs)	New forest, 'higher productivity' (with 35-year rotation), with 50-year afforestation duration
Aff45 (50yrs)	New forest, 'shortened-rotation' (i.e. to 45-year), with 50-year afforestation duration
Aff50 (50yrs)	New forest, 'reference-rotation' (i.e. 50-year), with 50-year afforestation duration
Aff55 (50yrs)	New forest, 'lengthened-rotation' (i.e. to 55-year), with 50-year afforestation duration
Projected_lo	Overseas forest HWP, for reference-rotation with no expansion (i.e. business as usual scneario, whereby all changes to demand from 2023 are supplied by imports), for low wood demand
Projected_hi	Overseas forest HWP, for reference-rotation with no expansion (i.e. business as usual scneario, whereby all changes to demand from 2023 are supplied by imports), for high wood demand
Marginal_imports_lo (Aff50yrs)	Overseas forest HWP, for low wood demand, for all modelled scenarios (high and low forest expansion), 50-year afforestation duration
Marginal_imports_lo (Aff35yrs)	Overseas forest HWP, for low wood demand, for all modelled scenarios (high and low forest expansion), 35-year afforestation duration
Marginal_imports_hi (Aff50yrs)	Overseas forest HWP, for high wood demand, for all modelled scenarios (high and low forest expansion), 50-year afforestation duration
Marginal_imports_hi (Aff35yrs)	Overseas forest HWP, for high wood demand, for all modelled scenarios (high and low forest expansion), 35-year afforestation duration
Prod_sub_tC	Avoided emissions "credits" per substituted tC of wood (used in Fig.4 in manuscript, and in worksheet 'Marg_imps_all_m3', descirbed in row 12 above.)

## Sheet: Results graphs (2)
		Low projected demand tables (50yr planting period):																					High projected demand tables (50yr planting period):																	Not used for main paper:
	Comparison of 2050 net impacts:
	50_35 + Aff35_hi	50_45 + Aff45_hi	50_50 + Aff50_hi	50_55 + Aff55_hi	50_35 + Aff35_lo	50_45 + Aff45_lo	50_50 + Aff50_lo	50_55 + Aff55_lo
hi demand	-3.63653e+07	-6.27858e+06	-1.69674e+07	-1.65534e+07	-2.81679e+07	-3.45782e+06	-1.41441e+07	-1.373e+07
low demand	-4.4073e+07	-1.49815e+07	-2.50407e+07	-2.53053e+07	-3.60055e+07	-1.22207e+07	-2.22774e+07	-2.2542e+07
	0.825117	0.41909	0.677592	0.654147	0.782323	0.282947	0.634906	0.609088

## Sheet: Results graphs
		Fig. 2								Fig 3
		Low projected demand tables (50yr planting period):								High projected demand tables (50yr planting period):
	This chart is only used to generate the legend:
	Comparison of 2050 net impacts:
	50_35 + Aff35_hi	50_45 + Aff45_hi	50_50 + Aff50_hi	50_55 + Aff55_hi	50_35 + Aff35_lo	50_45 + Aff45_lo	50_50 + Aff50_lo	50_55 + Aff55_lo
hi demand	-3.63653e+07	-6.27858e+06	-1.69674e+07	-1.65534e+07	-2.81679e+07	-3.45782e+06	-1.41441e+07	-1.373e+07
low demand	-4.4073e+07	-1.49815e+07	-2.50407e+07	-2.53053e+07	-3.60055e+07	-1.22207e+07	-2.22774e+07	-2.2542e+07
	0.825117	0.41909	0.677592	0.654147	0.782323	0.282947	0.634906	0.609088

## Sheet: Total_impact_hi (Aff50yrs)
Marginal impact results for high wood demand projection, all scenarios with 50-year afforestation duration																					Forest ecosystem C impact per tC harvested:		xxx
Units Mg CO2e
	Marginal domestic supply impact (HWP - existing forest + Aff_hi)																				Hi_projection Marginal import impact - demand for IRW met by increased harvest elsewhere															Hi_projection Net impact						Marginal import impact - demand for IRW not met (Increased use of concrete)				Net impact (with increased use of concrete)
	50_35 + Aff35_hi					50_45 + Aff45_hi					50_50 + Aff50_hi					50_55 + Aff55_hi					50_35 + Aff35_hi			50_45 + Aff45_hi			50_50 + Aff50_hi			50_55 + Aff55_hi			reference			50_35 + Aff35_hi	50_45 + Aff45_hi	50_50 + Aff50_hi	50_55 + Aff55_hi	reference		50_35 + Aff35_hi	50_45 + Aff45_hi	50_50 + Aff50_hi	50_55 + Aff55_hi	50_35 + Aff35_hi	50_45 + Aff45_hi	50_50 + Aff50_hi	50_55 + Aff55_hi
	Ecosystem C		HWP		Total	Ecosystem C		HWP		Total	Ecosystem C		HWP		Total	Ecosystem C		HWP		Total	Ecosystem C	HWP	Total	Ecosystem C	HWP	Total	Ecosystem C	HWP	Total	Ecosystem C	HWP	Total	Ecosystem C	HWP	Total
	Existing forest C	New forest C	Existing forest HWP	New forest HWP		Existing forest	New forest	Existing forest	New forest		Existing forest	New forest	Existing forest	New forest		Existing forest	New forest	Existing forest	New forest
2023	0	-596630	0	0	-596630	267411	-592896	303742	0	-21743.2	0	-592896	0	0	-592896	0	-592896	303742	0	-289154	0	0	0	0	0	0	0	0	0	-4.73852e-10	2.69843e-10	-2.04009e-10	0	0	0	-596630	-21743.2	-592896	-289154	0		0	0	0	-1.76023e-10	-596630	-21743.2	-592896	-289154
2024	-6736.99	-1.20374e+06	0	0	-1.21048e+06	556483	-1.18704e+06	298641	0	-331915	0	-1.18704e+06	0	0	-1.18704e+06	-273429	-1.18704e+06	298641	0	-1.16183e+06	64538.2	-36752.4	27785.8	597916	-340494	257422	64538.2	-36752.4	27785.8	597916	-340494	257422	64538.2	-36752.4	27785.8	-1.1827e+06	-74492.5	-1.15925e+06	-904405	27785.8		23974.1	222109	23974.1	222109	-1.18651e+06	-109806	-1.16307e+06	-939718
2025	-23742.5	-1.82875e+06	0	0	-1.85249e+06	862466	-1.78534e+06	291102	0	-631768	0	-1.78534e+06	0	0	-1.78534e+06	-301540	-1.78534e+06	291102	0	-1.79577e+06	193615	-110505	83109.3	714437	-409146	305291	193615	-110505	83109.3	714437	-409146	305291	193615	-110505	83109.3	-1.76938e+06	-326477	-1.70223e+06	-1.49048e+06	83109.3		72431.3	270108	72431.3	270108	-1.78006e+06	-361660	-1.7129e+06	-1.52567e+06
2026	-54067	-2.47878e+06	0	0	-2.53285e+06	1.18129e+06	-2.39106e+06	595115	0	-614661	0	-2.39106e+06	0	0	-2.39106e+06	-325277	-2.39106e+06	595115	0	-2.12122e+06	387229	-221217	166012	895496	-512319	383178	387229	-221217	166012	895496	-512319	383178	387229	-221217	166012	-2.36684e+06	-231484	-2.22505e+06	-1.73805e+06	166012		145880	343000	145880	343000	-2.38697e+06	-271661	-2.24518e+06	-1.77822e+06
2027	-100329	-3.16069e+06	0	0	-3.26102e+06	1.50977e+06	-3.00778e+06	584932	0	-913074	0	-3.00778e+06	0	0	-3.00778e+06	-623235	-3.00778e+06	584932	0	-3.04608e+06	645382	-368926	276456	1.68703e+06	-964041	722986	645382	-368926	276456	1.68703e+06	-964041	722986	645382	-368926	276456	-2.98457e+06	-190088	-2.73132e+06	-2.3231e+06	276456		244830	644093	244830	644093	-3.01619e+06	-268980	-2.76295e+06	-2.40199e+06
2028	-164733	-3.88101e+06	0	0	-4.04574e+06	1.60724e+06	-3.63925e+06	569096	0	-1.46292e+06	0	-3.63925e+06	0	0	-3.63925e+06	-668048	-3.63925e+06	569096	0	-3.7382e+06	968073	-550291	417782	1.9868e+06	-1.1316e+06	855197	968073	-550291	417782	1.9868e+06	-1.1316e+06	855197	968073	-550291	417782	-3.62796e+06	-607721	-3.22147e+06	-2.883e+06	417782		366351	761694	366351	761694	-3.67939e+06	-701223	-3.2729e+06	-2.97651e+06
2029	-249084	-4.64589e+06	0	0	-4.89498e+06	1.68858e+06	-4.28938e+06	869109	0	-1.7317e+06	0	-4.28938e+06	0	0	-4.28938e+06	-705614	-4.28938e+06	869109	0	-4.12589e+06	1.3553e+06	-767522	587780	2.35111e+06	-1.333e+06	1.01811e+06	1.3553e+06	-767522	587780	2.35111e+06	-1.333e+06	1.01811e+06	1.3553e+06	-767522	587780	-4.3072e+06	-713586	-3.70161e+06	-3.10778e+06	587780		513014	904339	513014	904339	-4.38196e+06	-827360	-3.77637e+06	-3.22155e+06
2030	-354807	-5.46113e+06	0	0	-5.81593e+06	1.75575e+06	-4.96219e+06	849121	0	-2.35732e+06	0	-4.96219e+06	0	0	-4.96219e+06	-1.01981e+06	-4.96219e+06	849121	0	-5.13288e+06	1.80707e+06	-1.01894e+06	788127	3.33626e+06	-1.88265e+06	1.4536e+06	1.80707e+06	-1.01894e+06	788127	3.33626e+06	-1.88265e+06	1.4536e+06	1.80707e+06	-1.01894e+06	788127	-5.02781e+06	-903715	-4.17406e+06	-3.67927e+06	788127		680224	1.26657e+06	680224	1.26657e+06	-5.13571e+06	-1.09074e+06	-4.28197e+06	-3.8663e+06
2031	-482969	-6.3321e+06	0	0	-6.81507e+06	1.81033e+06	-5.66172e+06	827254	0	-3.02413e+06	0	-5.66172e+06	0	0	-5.66172e+06	-1.07394e+06	-5.66172e+06	827254	0	-5.9084e+06	2.32337e+06	-1.30587e+06	1.01751e+06	3.81929e+06	-2.14959e+06	1.6697e+06	2.32337e+06	-1.30587e+06	1.01751e+06	3.81929e+06	-2.14959e+06	1.6697e+06	2.32337e+06	-1.30587e+06	1.01751e+06	-5.79756e+06	-1.35443e+06	-4.64421e+06	-4.2387e+06	1.01751e+06		872342	1.45282e+06	872342	1.45282e+06	-5.94272e+06	-1.57131e+06	-4.78937e+06	-4.45558e+06
2032	-634319	-7.2638e+06	0	0	-7.89812e+06	1.85358e+06	-6.39201e+06	1.12564e+06	0	-3.41279e+06	0	-6.39201e+06	0	0	-6.39201e+06	-1.1187e+06	-6.39201e+06	1.12564e+06	0	-6.38507e+06	2.90422e+06	-1.62829e+06	1.27593e+06	4.36687e+06	-2.45014e+06	1.91673e+06	2.90422e+06	-1.62829e+06	1.27593e+06	4.36687e+06	-2.45014e+06	1.91673e+06	2.90422e+06	-1.62829e+06	1.27593e+06	-6.62218e+06	-1.49606e+06	-5.11608e+06	-4.46834e+06	1.27593e+06		1.08962e+06	1.66411e+06	1.08962e+06	1.66411e+06	-6.80849e+06	-1.74869e+06	-5.30239e+06	-4.72096e+06
2033	-809318	-8.26083e+06	0	0	-9.07015e+06	2.15397e+06	-7.15708e+06	1.39752e+06	0	-3.60559e+06	0	-7.15708e+06	0	0	-7.15708e+06	-1.44309e+06	-7.15708e+06	1.39752e+06	0	-7.20266e+06	3.5496e+06	-1.98206e+06	1.56754e+06	5.54563e+06	-3.09997e+06	2.44566e+06	3.5496e+06	-1.98206e+06	1.56754e+06	5.54563e+06	-3.09997e+06	2.44566e+06	3.5496e+06	-1.98206e+06	1.56754e+06	-7.50261e+06	-1.15993e+06	-5.58954e+06	-4.757e+06	1.56754e+06		1.32818e+06	2.0972e+06	1.32818e+06	2.0972e+06	-7.74197e+06	-1.50839e+06	-5.82891e+06	-5.10546e+06
2034	-1.00818e+06	-9.32744e+06	0	0	-1.03356e+07	2.46666e+06	-7.96088e+06	1.36028e+06	0	-4.13395e+06	0	-7.96088e+06	0	0	-7.96088e+06	-1.77448e+06	-7.96088e+06	1.36028e+06	0	-8.37509e+06	4.25952e+06	-2.37052e+06	1.88899e+06	6.74533e+06	-3.76032e+06	2.98501e+06	4.25952e+06	-2.37052e+06	1.88899e+06	6.74533e+06	-3.76032e+06	2.98501e+06	4.25952e+06	-2.37052e+06	1.88899e+06	-8.44663e+06	-1.14894e+06	-6.07189e+06	-5.39008e+06	1.88899e+06		1.59158e+06	2.54105e+06	1.59158e+06	2.54105e+06	-8.74405e+06	-1.59289e+06	-6.3693e+06	-5.83403e+06
2035	-1.2309e+06	-1.04675e+07	0	0	-1.16984e+07	2.78765e+06	-8.80724e+06	1.64619e+06	0	-4.3734e+06	0	-8.80724e+06	0	0	-8.80724e+06	-1.84949e+06	-8.80724e+06	1.64619e+06	0	-9.01054e+06	5.03398e+06	-2.79364e+06	2.24034e+06	7.46362e+06	-4.14619e+06	3.31744e+06	5.03398e+06	-2.79364e+06	2.24034e+06	7.46362e+06	-4.14619e+06	3.31744e+06	5.03398e+06	-2.79364e+06	2.24034e+06	-9.45807e+06	-1.05596e+06	-6.5669e+06	-5.6931e+06	2.24034e+06		1.88e+06	2.81635e+06	1.88e+06	2.81635e+06	-9.81841e+06	-1.55704e+06	-6.92724e+06	-6.19419e+06
2036	-1.47729e+06	-1.16846e+07	0	0	-1.31619e+07	3.11357e+06	-9.69989e+06	1.90999e+06	0	-4.67634e+06	0	-9.69989e+06	0	0	-9.69989e+06	-2.20318e+06	-9.69989e+06	1.90999e+06	0	-9.99308e+06	5.87297e+06	-3.25137e+06	2.62161e+06	8.82344e+06	-4.88983e+06	3.93361e+06	5.87297e+06	-3.25137e+06	2.62161e+06	8.82344e+06	-4.88983e+06	3.93361e+06	5.87297e+06	-3.25137e+06	2.62161e+06	-1.05403e+07	-742726	-7.07829e+06	-6.05947e+06	2.62161e+06		2.19363e+06	3.32273e+06	2.19363e+06	3.32273e+06	-1.09682e+07	-1.3536e+06	-7.50627e+06	-6.67035e+06
2037	-1.74702e+06	-1.29818e+07	0	0	-1.47289e+07	3.44184e+06	-1.06424e+07	1.8594e+06	0	-5.34118e+06	0	-1.06424e+07	0	0	-1.06424e+07	-2.55863e+06	-1.06424e+07	1.8594e+06	0	-1.13416e+07	6.77651e+06	-3.74368e+06	3.03283e+06	1.02064e+07	-5.64594e+06	4.56049e+06	6.77651e+06	-3.74368e+06	3.03283e+06	1.02064e+07	-5.64594e+06	4.56049e+06	6.77651e+06	-3.74368e+06	3.03283e+06	-1.1696e+07	-780691	-7.6096e+06	-6.78116e+06	3.03283e+06		2.53264e+06	3.84118e+06	2.53264e+06	3.84118e+06	-1.21962e+07	-1.5e+06	-8.10978e+06	-7.50047e+06
2038	-2.0396e+06	-1.43622e+07	0	0	-1.64018e+07	3.53232e+06	-1.16383e+07	1.80823e+06	0	-6.29772e+06	0	-1.16383e+07	0	0	-1.16383e+07	-2.64852e+06	-1.16383e+07	1.80823e+06	0	-1.24786e+07	7.74458e+06	-4.27056e+06	3.47402e+06	1.10977e+07	-6.12223e+06	4.97543e+06	7.74458e+06	-4.27056e+06	3.47402e+06	1.10977e+07	-6.12223e+06	4.97543e+06	7.74458e+06	-4.27056e+06	3.47402e+06	-1.29278e+07	-1.32229e+06	-8.16425e+06	-7.50313e+06	3.47402e+06		2.89722e+06	4.18788e+06	2.89722e+06	4.18788e+06	-1.35046e+07	-2.10984e+06	-8.74105e+06	-8.29068e+06
2039	-2.45827e+06	-1.59342e+07	0	0	-1.83925e+07	3.60043e+06	-1.26907e+07	2.07179e+06	0	-7.01848e+06	0	-1.26907e+07	0	0	-1.26907e+07	-2.72013e+06	-1.26907e+07	2.07179e+06	0	-1.3339e+07	8.77719e+06	-4.83199e+06	3.9452e+06	1.20534e+07	-6.63249e+06	5.42094e+06	8.77719e+06	-4.83199e+06	3.9452e+06	1.20534e+07	-6.63249e+06	5.42094e+06	8.77719e+06	-4.83199e+06	3.9452e+06	-1.44473e+07	-1.59754e+06	-8.7455e+06	-7.9181e+06	3.9452e+06		3.28754e+06	4.56011e+06	3.28754e+06	4.56011e+06	-1.51049e+07	-2.45838e+06	-9.40316e+06	-8.77894e+06
2040	-2.98515e+06	-1.75676e+07	-67835.4	-56181.5	-2.06768e+07	3.64856e+06	-1.38028e+07	2.01776e+06	0	-8.13649e+06	0	-1.38028e+07	0	0	-1.38028e+07	-3.05849e+06	-1.38028e+07	2.01776e+06	0	-1.48435e+07	9.87434e+06	-5.42373e+06	4.45061e+06	1.363e+07	-7.48602e+06	6.144e+06	9.87434e+06	-5.42373e+06	4.45061e+06	1.363e+07	-7.48602e+06	6.144e+06	9.87434e+06	-5.42373e+06	4.45061e+06	-1.62262e+07	-1.99249e+06	-9.35221e+06	-8.69954e+06	4.45061e+06		3.69098e+06	5.13844e+06	3.69098e+06	5.13844e+06	-1.69858e+07	-2.99805e+06	-1.01118e+07	-9.7051e+06
2041	-3.47445e+06	-1.93648e+07	-135996	-112662	-2.30879e+07	3.67872e+06	-1.49775e+07	1.96259e+06	0	-9.33623e+06	0	-1.49775e+07	0	0	-1.49775e+07	-3.12785e+06	-1.49775e+07	1.96259e+06	0	-1.61428e+07	1.05236e+07	-5.76317e+06	4.76044e+06	1.47045e+07	-8.05794e+06	6.64658e+06	1.1036e+07	-6.04968e+06	4.98635e+06	1.47045e+07	-8.05794e+06	6.64658e+06	1.1036e+07	-6.04968e+06	4.98635e+06	-1.83275e+07	-2.68965e+06	-9.99119e+06	-9.49622e+06	4.98635e+06		3.94154e+06	5.54626e+06	4.11962e+06	5.54626e+06	-1.91464e+07	-3.78997e+06	-1.08579e+07	-1.05965e+07
2042	-4.0515e+06	-2.13262e+07	-204493	-168120	-2.57504e+07	3.69259e+06	-1.62176e+07	2.22604e+06	0	-1.0299e+07	0	-1.62176e+07	0	0	-1.62176e+07	-3.17971e+06	-1.62176e+07	2.22604e+06	0	-1.71713e+07	1.12374e+07	-6.13745e+06	5.09997e+06	1.58436e+07	-8.6629e+06	7.18065e+06	1.22623e+07	-6.70981e+06	5.55244e+06	1.58436e+07	-8.6629e+06	7.18065e+06	1.22623e+07	-6.70981e+06	5.55244e+06	-2.06504e+07	-3.11833e+06	-1.06652e+07	-9.99062e+06	5.55244e+06		4.21617e+06	5.97921e+06	4.57363e+06	5.97921e+06	-2.15342e+07	-4.31977e+06	-1.1644e+07	-1.11921e+07
2043	-4.56411e+06	-2.32952e+07	-235511	-223403	-2.83183e+07	3.959e+06	-1.74503e+07	2.43445e+06	-33258.4	-1.10901e+07	0	-1.74503e+07	0	-33258.4	-1.74835e+07	-3.50378e+06	-1.74503e+07	2.46336e+06	-33258.4	-1.85239e+07	1.20158e+07	-6.54229e+06	5.47348e+06	1.76138e+07	-9.61105e+06	8.00272e+06	1.3553e+07	-7.39672e+06	6.15629e+06	1.76138e+07	-9.61105e+06	8.00272e+06	1.3553e+07	-7.39672e+06	6.15629e+06	-2.28448e+07	-3.08735e+06	-1.13272e+07	-1.05212e+07	6.15629e+06		4.50847e+06	6.62479e+06	5.04576e+06	6.62479e+06	-2.38098e+07	-4.46528e+06	-1.24378e+07	-1.18991e+07
2044	-5.09301e+06	-2.52705e+07	-266642	-278860	-3.0909e+07	4.31132e+06	-1.87418e+07	2.33554e+06	-66607.7	-1.21615e+07	0	-1.87418e+07	0	-66607.7	-1.88084e+07	-3.82802e+06	-1.87418e+07	2.4009e+06	-66607.7	-2.02355e+07	1.29978e+07	-7.06086e+06	5.93691e+06	1.91281e+07	-1.04141e+07	8.71402e+06	1.47525e+07	-8.03e+06	6.72245e+06	1.92491e+07	-1.04816e+07	8.76741e+06	1.48916e+07	-8.10771e+06	6.78386e+06	-2.49721e+07	-3.4475e+06	-1.20859e+07	-1.14681e+07	6.78386e+06		4.87297e+06	7.18508e+06	5.48875e+06	7.22705e+06	-2.60361e+07	-4.97644e+06	-1.33196e+07	-1.30084e+07
2045	-5.56397e+06	-2.7251e+07	-297890	-334499	-3.34474e+07	4.69092e+06	-2.00958e+07	2.57959e+06	-100053	-1.29253e+07	0	-2.00958e+07	0	-100053	-2.01959e+07	-3.90639e+06	-2.00958e+07	2.65259e+06	-100053	-2.14496e+07	1.40443e+07	-7.61468e+06	6.42963e+06	2.0161e+07	-1.09438e+07	9.21726e+06	1.60164e+07	-8.69695e+06	7.31947e+06	2.04341e+07	-1.10961e+07	9.33802e+06	1.62947e+07	-8.85211e+06	7.44254e+06	-2.70178e+07	-3.70808e+06	-1.28764e+07	-1.21116e+07	7.44254e+06		5.26181e+06	7.58132e+06	5.95651e+06	7.67632e+06	-2.81856e+07	-5.34402e+06	-1.42393e+07	-1.37733e+07
2046	-5.97287e+06	-2.92358e+07	-329260	-390328	-3.59283e+07	5.03209e+06	-2.15155e+07	2.80155e+06	-133599	-1.38155e+07	0	-2.15155e+07	0	-133599	-2.16491e+07	-4.24338e+06	-2.15155e+07	2.88222e+06	-133599	-2.30103e+07	1.51554e+07	-8.20271e+06	6.95267e+06	2.19253e+07	-1.18803e+07	1.0045e+07	1.73449e+07	-9.39823e+06	7.9467e+06	2.22295e+07	-1.2049e+07	1.01805e+07	1.77623e+07	-9.62998e+06	8.13231e+06	-2.89756e+07	-3.77049e+06	-1.37024e+07	-1.28297e+07	8.13231e+06		5.67512e+06	8.23336e+06	6.44916e+06	8.33972e+06	-3.02531e+07	-5.58209e+06	-1.51999e+07	-1.46705e+07
2047	-6.31614e+06	-3.1224e+07	-360755	-446354	-3.83472e+07	5.37186e+06	-2.30036e+07	2.71088e+06	-167251	-1.50881e+07	0	-2.30036e+07	0	-167251	-2.31708e+07	-4.57652e+06	-2.30036e+07	2.8067e+06	-167251	-2.49406e+07	1.6331e+07	-8.8248e+06	7.50621e+06	2.37127e+07	-1.28293e+07	1.08834e+07	1.8738e+07	-1.01336e+07	8.60436e+06	2.40481e+07	-1.30138e+07	1.10343e+07	1.92945e+07	-1.04412e+07	8.85321e+06	-3.0841e+07	-4.20471e+06	-1.45665e+07	-1.39063e+07	8.85321e+06		6.11302e+06	8.89693e+06	6.96684e+06	9.0147e+06	-3.22342e+07	-6.19115e+06	-1.6204e+07	-1.59259e+07
2048	-6.66795e+06	-3.32954e+07	-392379	-502585	-4.08583e+07	5.47034e+06	-2.45623e+07	2.62727e+06	-201014	-1.66657e+07	0	-2.45623e+07	0	-201014	-2.47633e+07	-4.65572e+06	-2.45623e+07	2.72338e+06	-201014	-2.66957e+07	1.75712e+07	-9.4808e+06	8.09035e+06	2.50083e+07	-1.34996e+07	1.15087e+07	2.01956e+07	-1.09029e+07	9.29264e+06	2.54061e+07	-1.37174e+07	1.16887e+07	2.08912e+07	-1.12859e+07	9.6053e+06	-3.27679e+07	-5.15696e+06	-1.54707e+07	-1.50069e+07	9.6053e+06		6.57563e+06	9.3934e+06	7.50966e+06	9.53347e+06	-3.42826e+07	-7.2723e+06	-1.72537e+07	-1.71622e+07
2049	-7.0277e+06	-3.54512e+07	-424135	-559027	-4.34621e+07	5.52642e+06	-2.61936e+07	2.85678e+06	-234891	-1.80453e+07	0	-2.61936e+07	0	-234891	-2.64285e+07	-4.69768e+06	-2.61936e+07	2.9532e+06	-234891	-2.8173e+07	1.88758e+07	-1.01706e+07	8.70523e+06	2.63997e+07	-1.42206e+07	1.21791e+07	2.17177e+07	-1.1706e+07	1.00117e+07	2.67975e+07	-1.44369e+07	1.23606e+07	2.25524e+07	-1.21638e+07	1.03886e+07	-3.47569e+07	-5.86625e+06	-1.64168e+07	-1.58124e+07	1.03886e+07		7.06309e+06	9.92564e+06	8.07776e+06	1.00665e+07	-3.6399e+07	-8.11967e+06	-1.83507e+07	-1.81065e+07
2050	-7.39495e+06	-3.76926e+07	-453408	-615688	-4.61567e+07	5.55701e+06	-2.78991e+07	2.77144e+06	-266314	-1.9837e+07	0	-2.78991e+07	0	-268889	-2.8168e+07	-5.0018e+06	-2.78991e+07	2.875e+06	-268889	-3.02948e+07	2.02451e+07	-1.0871e+07	9.37412e+06	2.84119e+07	-1.52546e+07	1.31573e+07	2.33044e+07	-1.25159e+07	1.07884e+07	2.88096e+07	-1.54693e+07	1.33404e+07	2.42782e+07	-1.3046e+07	1.12322e+07	-3.67825e+07	-6.67969e+06	-1.73795e+07	-1.69544e+07	1.12322e+07	2050 year	7.51717e+06	1.05911e+07	8.60373e+06	1.07325e+07	-3.86395e+07	-9.24584e+06	-1.95643e+07	-1.95623e+07
2051	-7.7695e+06	-4.00203e+07	-482780	-672575	-4.89452e+07	5.56465e+06	-2.968e+07	2.68514e+06	-297819	-2.1728e+07	0	-2.968e+07	0	-303010	-2.9983e+07	-5.04956e+06	-2.968e+07	2.78893e+06	-303010	-3.22437e+07	2.16788e+07	-1.16037e+07	1.00751e+07	2.9922e+07	-1.60127e+07	1.39092e+07	2.49556e+07	-1.33581e+07	1.15975e+07	3.03509e+07	-1.6243e+07	1.41079e+07	2.60685e+07	-1.39602e+07	1.21083e+07	-3.88701e+07	-7.81881e+06	-1.83856e+07	-1.81358e+07	1.21083e+07		7.99329e+06	1.11022e+07	9.15204e+06	1.12539e+07	-4.09519e+07	-1.06258e+07	-2.0831e+07	-2.09898e+07
2052	-8.14678e+06	-4.24351e+07	-512255	-725095	-5.18192e+07	5.55148e+06	-3.15418e+07	2.88268e+06	-329408	-2.34371e+07	0	-3.15418e+07	0	-334599	-3.18764e+07	-5.06181e+06	-3.15418e+07	3.01365e+06	-334599	-3.39246e+07	2.31772e+07	-1.23689e+07	1.08083e+07	3.14966e+07	-1.68019e+07	1.46946e+07	2.66713e+07	-1.42325e+07	1.24388e+07	3.19255e+07	-1.7031e+07	1.48945e+07	2.79234e+07	-1.49063e+07	1.30171e+07	-4.10109e+07	-8.74245e+06	-1.94376e+07	-1.90301e+07	1.30171e+07		8.49155e+06	1.16355e+07	9.72279e+06	1.17878e+07	-4.33277e+07	-1.18016e+07	-2.21537e+07	-2.21368e+07
2053	-8.53109e+06	-4.49339e+07	-541837	-777782	-5.47846e+07	5.78676e+06	-3.34776e+07	3.05692e+06	-361086	-2.4995e+07	0	-3.34776e+07	0	-366278	-3.38439e+07	-5.34173e+06	-3.34776e+07	3.22206e+06	-366278	-3.59635e+07	2.474e+07	-1.31663e+07	1.15737e+07	3.35814e+07	-1.7868e+07	1.57134e+07	2.84516e+07	-1.5139e+07	1.33126e+07	3.41313e+07	-1.81618e+07	1.59695e+07	2.98428e+07	-1.58842e+07	1.39586e+07	-4.32109e+07	-9.28159e+06	-2.05313e+07	-1.9994e+07	1.39586e+07		9.01204e+06	1.23306e+07	1.03161e+07	1.25213e+07	-4.57726e+07	-1.26644e+07	-2.35278e+07	-2.34422e+07
2054	-8.92299e+06	-4.75172e+07	-571529	-830643	-5.78424e+07	6.10334e+06	-3.54875e+07	2.95131e+06	-392858	-2.68257e+07	0	-3.54875e+07	0	-398050	-3.58855e+07	-5.63691e+06	-3.54875e+07	3.1307e+06	-398050	-3.83917e+07	2.63674e+07	-1.39959e+07	1.23715e+07	3.56872e+07	-1.8943e+07	1.67442e+07	3.02964e+07	-1.60776e+07	1.42188e+07	3.63892e+07	-1.93185e+07	1.70708e+07	3.18267e+07	-1.68939e+07	1.49328e+07	-4.54709e+07	-1.00815e+07	-2.16667e+07	-2.13209e+07	1.49328e+07		9.55485e+06	1.30351e+07	1.09319e+07	1.32742e+07	-4.82875e+07	-1.37905e+07	-2.49536e+07	-2.51175e+07
2055	-9.32297e+06	-5.01856e+07	-601334	-883684	-6.09935e+07	6.44448e+06	-3.75716e+07	3.15953e+06	-424728	-2.83923e+07	0	-3.75716e+07	0	-429920	-3.80015e+07	-5.66915e+06	-3.75716e+07	3.34627e+06	-429920	-4.03244e+07	2.80593e+07	-1.48577e+07	1.32016e+07	3.74014e+07	-1.97999e+07	1.76015e+07	3.22058e+07	-1.70481e+07	1.51576e+07	3.81658e+07	-2.02073e+07	1.79585e+07	3.38752e+07	-1.79353e+07	1.59398e+07	-4.77919e+07	-1.07908e+07	-2.28439e+07	-2.23659e+07	1.59398e+07		1.01201e+07	1.36199e+07	1.15705e+07	1.38794e+07	-5.08735e+07	-1.47724e+07	-2.6431e+07	-2.6445e+07
2056	-9.73151e+06	-5.29392e+07	-631255	-936911	-6.42389e+07	6.74486e+06	-3.97303e+07	3.34627e+06	-456699	-3.00958e+07	0	-3.97303e+07	0	-461891	-4.01921e+07	-5.95632e+06	-3.97303e+07	3.54734e+06	-461891	-4.26011e+07	2.98158e+07	-1.57515e+07	1.40642e+07	3.97571e+07	-2.10029e+07	1.87542e+07	3.41797e+07	-1.80506e+07	1.61291e+07	4.05526e+07	-2.14247e+07	1.91279e+07	3.59882e+07	-1.90085e+07	1.69797e+07	-5.01747e+07	-1.13416e+07	-2.40631e+07	-2.34732e+07	1.69797e+07		1.07077e+07	1.44078e+07	1.22319e+07	1.46781e+07	-5.35312e+07	-1.5688e+07	-2.79603e+07	-2.7923e+07
2057	-1.01491e+07	-5.46158e+07	-1.86369e+06	-2.18636e+06	-6.8815e+07	7.04272e+06	-4.19635e+07	3.2349e+06	-488776	-3.21747e+07	0	-4.19635e+07	0	-493968	-4.24575e+07	-6.25553e+06	-4.19635e+07	3.4434e+06	-493968	-4.52696e+07	3.16368e+07	-1.66774e+07	1.49593e+07	4.21359e+07	-2.22162e+07	1.99197e+07	3.62181e+07	-1.90849e+07	1.71332e+07	4.29938e+07	-2.26695e+07	2.03243e+07	3.81657e+07	-2.01134e+07	1.80524e+07	-5.38556e+07	-1.2255e+07	-2.53243e+07	-2.49453e+07	1.80524e+07		1.1318e+07	1.52061e+07	1.29161e+07	1.5497e+07	-5.74969e+07	-1.69686e+07	-2.95414e+07	-2.97726e+07
2058	-9.42738e+06	-5.62066e+07	-3.09172e+06	-3.43151e+06	-7.21572e+07	7.09688e+06	-4.42678e+07	3.12328e+06	-520962	-3.45686e+07	0	-4.42678e+07	0	-526154	-4.4794e+07	-6.28449e+06	-4.42678e+07	3.33231e+06	-526154	-4.77462e+07	2.91209e+07	-1.52369e+07	1.3884e+07	4.40542e+07	-2.31733e+07	2.0881e+07	3.83211e+07	-2.01511e+07	1.817e+07	4.49433e+07	-2.36411e+07	2.13021e+07	4.04078e+07	-2.12499e+07	1.91579e+07	-5.82732e+07	-1.36877e+07	-2.6624e+07	-2.6444e+07	1.91579e+07		1.05735e+07	1.58635e+07	1.36233e+07	1.61653e+07	-6.15837e+07	-1.87051e+07	-3.11707e+07	-3.15808e+07
2059	-8.55866e+06	-5.77333e+07	-4.30548e+06	-4.66253e+06	-7.526e+07	7.10638e+06	-4.66433e+07	3.31734e+06	-553261	-3.67729e+07	0	-4.66433e+07	0	-558453	-4.72018e+07	-6.27393e+06	-4.66433e+07	3.52692e+06	-558453	-4.99488e+07	2.66696e+07	-1.38373e+07	1.28323e+07	4.6037e+07	-2.41617e+07	2.18753e+07	4.04886e+07	-2.1249e+07	1.92396e+07	4.69261e+07	-2.46272e+07	2.22989e+07	4.27144e+07	-2.2418e+07	2.02964e+07	-6.24277e+07	-1.48976e+07	-2.79622e+07	-2.76499e+07	2.02964e+07		9.84583e+06	1.65437e+07	1.43535e+07	1.68467e+07	-6.54142e+07	-2.02292e+07	-3.28483e+07	-3.31021e+07
2060	-7.56143e+06	-5.92148e+07	-5.50765e+06	-5.88212e+06	-7.8166e+07	7.08903e+06	-4.90901e+07	3.20354e+06	-585677	-3.93832e+07	0	-4.90901e+07	0	-590868	-4.96809e+07	-6.52529e+06	-4.90901e+07	3.42065e+06	-590868	-5.27856e+07	2.42829e+07	-1.24984e+07	1.17844e+07	4.86407e+07	-2.54874e+07	2.31533e+07	4.27206e+07	-2.23787e+07	2.03419e+07	4.95297e+07	-2.59506e+07	2.35791e+07	4.50856e+07	-2.36177e+07	2.14679e+07	-6.63816e+07	-1.62299e+07	-2.9339e+07	-2.92065e+07	2.14679e+07		9.135e+06	1.74209e+07	1.51069e+07	1.77251e+07	-6.9031e+07	-2.19623e+07	-3.45741e+07	-3.50605e+07
2061	-6.45183e+06	-6.06674e+07	-6.70035e+06	-7.09236e+06	-8.09119e+07	7.04749e+06	-5.16082e+07	3.08888e+06	-618212	-4.209e+07	0	-5.16082e+07	0	-623404	-5.22316e+07	-6.51883e+06	-5.16082e+07	3.30661e+06	-623404	-5.54438e+07	2.19606e+07	-1.12147e+07	1.07459e+07	5.07422e+07	-2.65368e+07	2.42055e+07	4.50172e+07	-2.35401e+07	2.14771e+07	5.16625e+07	-2.7015e+07	2.46474e+07	4.75213e+07	-2.4849e+07	2.26723e+07	-7.0166e+07	-1.78845e+07	-3.07544e+07	-3.07964e+07	2.26723e+07		8.44114e+06	1.81445e+07	1.58835e+07	1.84596e+07	-7.24708e+07	-2.39455e+07	-3.63481e+07	-3.69841e+07
2062	-5.24409e+06	-6.21056e+07	-7.88518e+06	-8.29488e+06	-8.35297e+07	6.98405e+06	-5.41977e+07	3.28511e+06	-650872	-4.45794e+07	0	-5.41977e+07	0	-656063	-5.48537e+07	-6.47542e+06	-5.41977e+07	3.50348e+06	-656063	-5.78257e+07	1.97029e+07	-9.98198e+06	9.72097e+06	5.29083e+07	-2.76168e+07	2.52915e+07	4.73783e+07	-2.47331e+07	2.26452e+07	5.38285e+07	-2.80933e+07	2.57352e+07	5.00215e+07	-2.61118e+07	2.39097e+07	-7.38087e+07	-1.92878e+07	-3.22085e+07	-3.20905e+07	2.39097e+07		7.76433e+06	1.88911e+07	1.66834e+07	1.92075e+07	-7.57654e+07	-2.56883e+07	-3.81704e+07	-3.86182e+07
2063	-3.95629e+06	-6.3542e+07	-9.06342e+06	-9.49092e+06	-8.60527e+07	7.16738e+06	-5.68533e+07	3.43122e+06	-683658	-4.69383e+07	0	-5.68533e+07	0	-688850	-5.75421e+07	-6.70014e+06	-5.68533e+07	3.68414e+06	-688850	-6.05581e+07	1.75098e+07	-8.79697e+06	8.71282e+06	5.57056e+07	-2.90392e+07	2.66663e+07	4.9804e+07	-2.59578e+07	2.38462e+07	5.66258e+07	-2.95141e+07	2.71117e+07	5.25863e+07	-2.74061e+07	2.51802e+07	-7.73398e+07	-2.0272e+07	-3.36959e+07	-3.34464e+07	2.51802e+07		7.10467e+06	1.98381e+07	1.75067e+07	2.01558e+07	-7.8948e+07	-2.71002e+07	-4.00355e+07	-4.04023e+07
2064	-2.59982e+06	-6.49881e+07	-1.0236e+07	-1.06815e+07	-8.85054e+07	7.43043e+06	-5.9575e+07	3.27758e+06	-716576	-4.95835e+07	0	-5.9575e+07	0	-721768	-6.02967e+07	-6.94035e+06	-5.9575e+07	3.56514e+06	-721768	-6.36719e+07	1.53812e+07	-7.65716e+06	7.72402e+06	5.84028e+07	-3.04041e+07	2.79987e+07	5.22942e+07	-2.72141e+07	2.50801e+07	5.94752e+07	-3.09604e+07	2.85148e+07	5.52156e+07	-2.87319e+07	2.64837e+07	-8.07814e+07	-2.15849e+07	-3.52167e+07	-3.51572e+07	2.64837e+07		6.46222e+06	2.07577e+07	1.83534e+07	2.11242e+07	-8.20432e+07	-2.88258e+07	-4.19433e+07	-4.25477e+07
2065	-1.18491e+06	-6.64539e+07	-1.14038e+07	-1.18673e+07	-9.09099e+07	7.71767e+06	-6.23628e+07	3.45784e+06	-749628	-5.19369e+07	0	-6.23628e+07	0	-754819	-6.31176e+07	-6.91671e+06	-6.23628e+07	3.75318e+06	-754819	-6.62812e+07	1.33171e+07	-6.56057e+06	6.75654e+06	6.06187e+07	-3.15011e+07	2.91176e+07	5.48489e+07	-2.8502e+07	2.63469e+07	6.18431e+07	-3.21386e+07	2.97046e+07	5.79095e+07	-3.00892e+07	2.78203e+07	-8.41534e+07	-2.28194e+07	-3.67707e+07	-3.65766e+07	2.78203e+07		5.8371e+06	2.15303e+07	1.92238e+07	2.19458e+07	-8.50728e+07	-3.04067e+07	-4.38939e+07	-4.43353e+07
2066	279252	-6.79484e+07	-1.25674e+07	-1.3049e+07	-9.32856e+07	7.9639e+06	-6.52168e+07	3.61671e+06	-782816	-5.4419e+07	0	-6.52168e+07	0	-788007	-6.60048e+07	-7.14892e+06	-6.52168e+07	3.92681e+06	-788007	-6.92269e+07	1.13176e+07	-5.50561e+06	5.81196e+06	6.35658e+07	-3.29932e+07	3.05726e+07	5.74682e+07	-2.98215e+07	2.76467e+07	6.48215e+07	-3.36452e+07	3.11763e+07	6.06679e+07	-3.14779e+07	2.919e+07	-8.74736e+07	-2.38465e+07	-3.83581e+07	-3.80506e+07	2.919e+07		5.22937e+06	2.25347e+07	2.01178e+07	2.29617e+07	-8.80562e+07	-3.18843e+07	-4.58871e+07	-4.62652e+07
2067	1.78435e+06	-6.94797e+07	-1.37271e+07	-1.42271e+07	-9.56496e+07	8.2075e+06	-6.69187e+07	3.47061e+06	-2.0926e+06	-5.73332e+07	0	-6.8137e+07	0	-821336	-6.89583e+07	-7.39373e+06	-6.8137e+07	3.79553e+06	-821336	-7.25565e+07	9.38258e+06	-4.49107e+06	4.89151e+06	6.65361e+07	-3.4496e+07	3.20402e+07	6.0152e+07	-3.11724e+07	2.89796e+07	6.78541e+07	-3.51789e+07	3.26753e+07	6.34908e+07	-3.2898e+07	3.05928e+07	-9.07581e+07	-2.5293e+07	-3.99788e+07	-3.98813e+07	3.05928e+07		4.63914e+06	2.35503e+07	2.10355e+07	2.39986e+07	-9.10104e+07	-3.37828e+07	-4.79228e+07	-4.8558e+07
2068	3.31675e+06	-7.1055e+07	-1.48836e+07	-1.54019e+07	-9.80237e+07	8.3267e+06	-6.85203e+07	3.33128e+06	-3.39774e+06	-6.02601e+07	0	-7.11172e+07	0	-854807	-7.1972e+07	-7.36858e+06	-7.11172e+07	3.6572e+06	-854807	-7.56834e+07	7.51212e+06	-3.51597e+06	3.99616e+06	6.66722e+07	-3.44487e+07	3.22235e+07	6.29004e+07	-3.2555e+07	3.03454e+07	7.0395e+07	-3.64392e+07	3.39558e+07	6.63783e+07	-3.43496e+07	3.20287e+07	-9.40275e+07	-2.80365e+07	-4.16267e+07	-4.17276e+07	3.20287e+07		4.06648e+06	2.36831e+07	2.19771e+07	2.48857e+07	-9.39572e+07	-3.6577e+07	-4.9995e+07	-5.07978e+07
2069	4.86958e+06	-7.26807e+07	-1.60369e+07	-1.65737e+07	-1.00422e+08	8.42743e+06	-7.00398e+07	3.49771e+06	-4.68772e+06	-6.28024e+07	0	-7.41575e+07	0	-888425	-7.50459e+07	-7.30473e+06	-7.41575e+07	3.82466e+06	-888425	-7.8526e+07	5.7062e+06	-2.57951e+06	3.12669e+06	6.69041e+07	-3.44546e+07	3.24495e+07	6.57132e+07	-3.3969e+07	3.17443e+07	7.29693e+07	-3.77138e+07	3.52555e+07	6.93303e+07	-3.58325e+07	3.34977e+07	-9.7295e+07	-3.03529e+07	-4.33016e+07	-4.32705e+07	3.34977e+07		3.51149e+06	2.38459e+07	2.29426e+07	2.57866e+07	-9.69102e+07	-3.89565e+07	-5.21033e+07	-5.27394e+07
2070	6.43665e+06	-7.43626e+07	-1.71874e+07	-1.77429e+07	-1.02856e+08	8.67402e+06	-7.14929e+07	3.35637e+06	-5.96543e+06	-6.5428e+07	0	-7.72577e+07	0	-922191	-7.81799e+07	-7.50351e+06	-7.72577e+07	3.69134e+06	-922191	-8.19921e+07	3.96482e+06	-1.68107e+06	2.28376e+06	6.77567e+07	-3.48128e+07	3.29439e+07	6.85907e+07	-3.54145e+07	3.31762e+07	7.61644e+07	-3.93256e+07	3.68388e+07	7.23468e+07	-3.73469e+07	3.49999e+07	-1.00573e+08	-3.24841e+07	-4.50037e+07	-4.51533e+07	3.49999e+07		2.97424e+06	2.42034e+07	2.39321e+07	2.68854e+07	-9.9882e+07	-4.12246e+07	-5.42478e+07	-5.51067e+07
2071	8.01238e+06	-7.61059e+07	-1.83353e+07	-1.89096e+07	-1.05338e+08	8.92631e+06	-7.28934e+07	3.21425e+06	-7.23308e+06	-6.79859e+07	0	-8.04179e+07	0	-956110	-8.1374e+07	-7.44486e+06	-8.04179e+07	3.55034e+06	-956110	-8.52685e+07	2.28798e+06	-820118	1.46786e+06	6.81073e+07	-3.4907e+07	3.32002e+07	7.15326e+07	-3.68915e+07	3.46412e+07	7.88886e+07	-4.06783e+07	3.82103e+07	7.54279e+07	-3.88926e+07	3.65353e+07	-1.03871e+08	-3.47857e+07	-4.67328e+07	-4.70582e+07	3.65353e+07		2.45484e+06	2.44049e+07	2.49457e+07	2.78411e+07	-1.02884e+08	-4.3581e+07	-5.64283e+07	-5.74274e+07
2072	9.59172e+06	-7.73212e+07	-1.80022e+07	-2.0074e+07	-1.05806e+08	9.18323e+06	-7.36592e+07	3.38151e+06	-8.4924e+06	-6.95869e+07	0	-8.16764e+07	0	-2.44344e+06	-8.41199e+07	-7.35019e+06	-8.3044e+07	3.74569e+06	-990183	-8.76387e+07	675674	3762.75	679437	6.85223e+07	-3.50419e+07	3.34804e+07	7.45391e+07	-3.83999e+07	3.61393e+07	8.16461e+07	-4.20447e+07	3.96014e+07	7.85735e+07	-4.04697e+07	3.81038e+07	-1.05126e+08	-3.61065e+07	-4.79806e+07	-4.80372e+07	3.81038e+07		1.95336e+06	2.4627e+07	2.59835e+07	2.88109e+07	-1.03852e+08	-4.49599e+07	-5.81364e+07	-5.88278e+07
2073	9.78128e+06	-7.87099e+07	-1.76656e+07	-2.12281e+07	-1.07822e+08	9.17256e+06	-7.43965e+07	3.23363e+06	-9.74109e+06	-7.17314e+07	0	-8.28251e+07	0	-3.92401e+06	-8.67491e+07	-7.53878e+06	-8.57238e+07	3.63278e+06	-1.02402e+06	-9.06538e+07	1.7948e+06	-661959	1.13284e+06	6.94477e+07	-3.54479e+07	3.39998e+07	7.48968e+07	-3.84463e+07	3.64505e+07	8.50348e+07	-4.37366e+07	4.12983e+07	8.17371e+07	-4.20365e+07	3.97006e+07	-1.06689e+08	-3.77317e+07	-5.02986e+07	-4.93555e+07	3.97006e+07		2.30415e+06	2.49956e+07	2.61815e+07	2.99651e+07	-1.05518e+08	-4.67359e+07	-6.05676e+07	-6.06887e+07
2074	9.69716e+06	-8.02561e+07	-1.73446e+07	-2.23797e+07	-1.10283e+08	9.20646e+06	-7.51128e+07	3.1044e+06	-1.09833e+07	-7.37853e+07	0	-8.38812e+07	0	-5.38679e+06	-8.9268e+07	-7.47155e+06	-8.84548e+07	3.51861e+06	-1.05801e+06	-9.34657e+07	2.97846e+06	-1.35839e+06	1.62007e+06	6.98605e+07	-3.55788e+07	3.42818e+07	7.53189e+07	-3.85295e+07	3.67894e+07	8.79423e+07	-4.51627e+07	4.27796e+07	8.49653e+07	-4.36341e+07	4.13312e+07	-1.08663e+08	-3.95035e+07	-5.24786e+07	-5.06861e+07	4.13312e+07		2.67642e+06	2.5205e+07	2.64001e+07	3.09727e+07	-1.07607e+08	-4.85803e+07	-6.2868e+07	-6.2493e+07
2075	9.3764e+06	-8.18027e+07	-1.72267e+07	-2.30406e+07	-1.12694e+08	9.23573e+06	-7.58142e+07	3.19956e+06	-1.16305e+07	-7.50094e+07	0	-8.4859e+07	0	-6.1639e+06	-9.10229e+07	-7.38754e+06	-9.1234e+07	3.62195e+06	-1.09215e+06	-9.60918e+07	4.22666e+06	-1.75916e+06	2.4675e+06	7.04277e+07	-3.56529e+07	3.47749e+07	7.58056e+07	-3.85394e+07	3.72662e+07	9.09143e+07	-4.58707e+07	4.50436e+07	8.8258e+07	-4.44341e+07	4.38239e+07	-1.10226e+08	-4.02345e+07	-5.37566e+07	-5.10482e+07	4.38239e+07		2.75613e+06	2.53204e+07	2.65168e+07	3.12559e+07	-1.09937e+08	-4.9689e+07	-6.4506e+07	-6.48359e+07
2076	8.98121e+06	-8.34722e+07	-1.69913e+07	-2.42516e+07	-1.15734e+08	9.20049e+06	-7.65056e+07	3.06667e+06	-1.28622e+07	-7.71006e+07	0	-8.57698e+07	0	-7.60016e+06	-9.33699e+07	-7.56528e+06	-9.40581e+07	3.50423e+06	-1.12645e+06	-9.92456e+07	4.96861e+06	-2.18463e+06	2.78398e+06	7.16364e+07	-3.6223e+07	3.54135e+07	7.63569e+07	-3.87174e+07	3.76394e+07	9.44966e+07	-4.76566e+07	4.684e+07	9.16153e+07	-4.60937e+07	4.55216e+07	-1.1295e+08	-4.16871e+07	-5.57305e+07	-5.24056e+07	4.55216e+07		2.99306e+06	2.57798e+07	2.67768e+07	3.24814e+07	-1.12741e+08	-5.13208e+07	-6.65931e+07	-6.67643e+07
2077	8.39982e+06	-8.51026e+07	-1.67416e+07	-2.52624e+07	-1.18707e+08	9.1433e+06	-7.71912e+07	2.93565e+06	-1.39311e+07	-7.90433e+07	0	-8.66231e+07	0	-8.84861e+06	-9.54717e+07	-7.48324e+06	-9.54342e+07	3.37749e+06	-2.56656e+06	-1.02106e+08	5.77509e+06	-2.58683e+06	3.18826e+06	7.23224e+07	-3.64683e+07	3.58541e+07	7.69726e+07	-3.89016e+07	3.8071e+07	9.75873e+07	-4.89855e+07	4.86019e+07	9.5037e+07	-4.7579e+07	4.7458e+07	-1.15519e+08	-4.31892e+07	-5.74007e+07	-5.35046e+07	4.7458e+07		3.20269e+06	2.6036e+07	2.70208e+07	3.33719e+07	-1.15504e+08	-5.30073e+07	-6.84509e+07	-6.87346e+07
2078	7.79632e+06	-8.66875e+07	-1.65212e+07	-2.64695e+07	-1.21882e+08	9.16379e+06	-7.78742e+07	3.11478e+06	-1.51233e+07	-8.0719e+07	0	-8.74267e+07	0	-1.02663e+07	-9.76931e+07	-7.36958e+06	-9.66752e+07	3.55803e+06	-4.19417e+06	-1.04681e+08	6.64611e+06	-3.06677e+06	3.57934e+06	7.30687e+07	-3.67866e+07	3.62822e+07	7.76529e+07	-3.91639e+07	3.8489e+07	9.77708e+07	-4.89104e+07	4.88604e+07	9.85234e+07	-4.93002e+07	4.92231e+07	-1.18303e+08	-4.44368e+07	-5.9204e+07	-5.58206e+07	4.92231e+07		3.48178e+06	2.6353e+07	2.73225e+07	3.35421e+07	-1.184e+08	-5.4366e+07	-7.03706e+07	-7.11389e+07
2079	7.18409e+06	-8.82209e+07	-1.63064e+07	-2.76746e+07	-1.25018e+08	9.17257e+06	-7.85574e+07	2.97056e+06	-1.63117e+07	-8.2726e+07	0	-8.81873e+07	0	-1.16767e+07	-9.9864e+07	-7.52513e+06	-9.77986e+07	3.41527e+06	-5.80218e+06	-1.07711e+08	7.58167e+06	-3.57646e+06	4.00521e+06	7.4474e+07	-3.74655e+07	3.70085e+07	7.83978e+07	-3.94657e+07	3.89321e+07	9.8582e+07	-4.91814e+07	4.94006e+07	1.02074e+08	-5.10522e+07	5.1022e+07	-1.21013e+08	-4.57175e+07	-6.09319e+07	-5.83101e+07	5.1022e+07		3.78206e+06	2.68769e+07	2.76452e+07	3.39088e+07	-1.21236e+08	-5.58491e+07	-7.22189e+07	-7.38018e+07
2080	6.57502e+06	-8.96971e+07	-1.60963e+07	-2.88779e+07	-1.28096e+08	9.33285e+06	-7.92428e+07	2.82518e+06	-1.74967e+07	-8.45815e+07	0	-8.89103e+07	0	-1.30807e+07	-1.01991e+08	-7.40129e+06	-9.88183e+07	3.27833e+06	-7.39419e+06	-1.10335e+08	8.58177e+06	-4.11665e+06	4.46511e+06	7.53494e+07	-3.78556e+07	3.74939e+07	7.92072e+07	-3.98058e+07	3.94014e+07	9.88634e+07	-4.91797e+07	4.96837e+07	1.0569e+08	-5.2835e+07	5.28546e+07	-1.23631e+08	-4.70876e+07	-6.25896e+07	-6.06518e+07	5.28546e+07		4.10361e+06	2.72368e+07	2.79889e+07	3.41107e+07	-1.23993e+08	-5.73447e+07	-7.40021e+07	-7.62247e+07
2081	5.9797e+06	-9.11108e+07	-1.58903e+07	-3.00795e+07	-1.31101e+08	9.50358e+06	-7.9932e+07	3.0055e+06	-1.86784e+07	-8.61013e+07	0	-8.96004e+07	0	-1.4479e+07	-1.04079e+08	-7.27677e+06	-9.97459e+07	3.4602e+06	-8.97299e+06	-1.12535e+08	9.6464e+06	-4.68771e+06	4.95869e+06	7.62894e+07	-3.82787e+07	3.80107e+07	8.00811e+07	-4.01833e+07	3.98978e+07	9.92404e+07	-4.92409e+07	4.99995e+07	1.0937e+08	-5.46485e+07	5.47211e+07	-1.26142e+08	-4.80906e+07	-6.41816e+07	-6.25359e+07	5.47211e+07		4.4465e+06	2.76179e+07	2.83538e+07	3.43429e+07	-1.26654e+08	-5.84835e+07	-7.57257e+07	-7.81925e+07
2082	5.40762e+06	-9.25375e+07	-1.56878e+07	-3.12794e+07	-1.34097e+08	9.68305e+06	-8.06262e+07	2.86235e+06	-1.9857e+07	-8.79378e+07	0	-9.02616e+07	0	-1.58723e+07	-1.06134e+08	-7.42277e+06	-1.00591e+08	3.31866e+06	-1.05407e+07	-1.15236e+08	1.07756e+07	-5.28987e+06	5.4857e+06	7.78883e+07	-3.90616e+07	3.88267e+07	8.10196e+07	-4.05973e+07	4.04222e+07	1.00245e+08	-4.9655e+07	5.05902e+07	1.13114e+08	-5.64926e+07	5.66214e+07	-1.28611e+08	-4.91111e+07	-6.57116e+07	-6.46457e+07	5.66214e+07		4.8108e+06	2.82061e+07	2.87398e+07	3.47718e+07	-1.29286e+08	-5.97317e+07	-7.7394e+07	-8.04641e+07
2083	4.79006e+06	-9.39747e+07	-1.54884e+07	-3.24778e+07	-1.37151e+08	9.62023e+06	-8.13262e+07	2.69102e+06	-2.10326e+07	-9.00476e+07	0	-9.08972e+07	0	-1.72609e+07	-1.08158e+08	-7.28967e+06	-1.01362e+08	3.18284e+06	-1.20991e+07	-1.17568e+08	1.19693e+07	-5.92332e+06	6.04597e+06	7.89573e+07	-3.95549e+07	3.94024e+07	8.20226e+07	-4.10474e+07	4.09751e+07	1.0072e+08	-4.97877e+07	5.09325e+07	1.16923e+08	-5.83675e+07	5.85555e+07	-1.31105e+08	-5.06452e+07	-6.71829e+07	-6.66354e+07	5.85555e+07		5.19659e+06	2.86304e+07	2.91472e+07	3.50362e+07	-1.31954e+08	-6.14172e+07	-7.90109e+07	-8.25317e+07
2084	4.13268e+06	-9.54196e+07	-1.5292e+07	-3.36746e+07	-1.40253e+08	9.60623e+06	-8.20327e+07	2.84531e+06	-2.22054e+07	-9.17866e+07	0	-9.15101e+07	0	-1.86453e+07	-1.10155e+08	-7.15908e+06	-1.02066e+08	3.37273e+06	-1.36494e+07	-1.19502e+08	1.32275e+07	-6.58816e+06	6.63938e+06	7.997e+07	-4.00148e+07	3.99552e+07	8.30901e+07	-4.15331e+07	4.1557e+07	1.01291e+08	-4.99765e+07	5.13145e+07	1.20797e+08	-6.02731e+07	6.05235e+07	-1.33614e+08	-5.18314e+07	-6.85983e+07	-6.81872e+07	6.05235e+07		5.60395e+06	2.90384e+07	2.95758e+07	3.53311e+07	-1.3465e+08	-6.27483e+07	-8.05795e+07	-8.41705e+07
2085	3.44058e+06	-9.68698e+07	-1.50703e+07	-3.487e+07	-1.4337e+08	9.59135e+06	-8.2746e+07	2.68617e+06	-2.34425e+07	-9.3911e+07	0	-9.21028e+07	0	-2.00257e+07	-1.12128e+08	-7.31679e+06	-1.02709e+08	3.22136e+06	-1.51927e+07	-1.21997e+08	1.45503e+07	-7.32631e+06	7.22402e+06	8.16415e+07	-4.08707e+07	4.07708e+07	8.42222e+07	-4.20711e+07	4.2151e+07	1.0252e+08	-5.05458e+07	5.19747e+07	1.24735e+08	-6.23128e+07	6.24219e+07	-1.36145e+08	-5.31402e+07	-6.99774e+07	-7.00221e+07	6.24219e+07		5.94913e+06	2.94908e+07	2.98896e+07	3.56748e+07	-1.3742e+08	-6.44202e+07	-8.22389e+07	-8.63219e+07
2086	2.71838e+06	-9.83231e+07	-1.4851e+07	-3.6064e+07	-1.4652e+08	9.51532e+06	-8.34661e+07	2.52579e+06	-2.46764e+07	-9.61015e+07	0	-9.26774e+07	0	-2.14025e+07	-1.1408e+08	-7.18201e+06	-1.03296e+08	3.07579e+06	-1.67297e+07	-1.24132e+08	1.59377e+07	-8.09785e+06	7.8398e+06	8.2873e+07	-4.14708e+07	4.14022e+07	8.54188e+07	-4.2646e+07	4.27728e+07	1.03189e+08	-5.0793e+07	5.23961e+07	1.28737e+08	-6.43844e+07	6.43529e+07	-1.3868e+08	-5.46992e+07	-7.1307e+07	-7.17355e+07	6.43529e+07		6.31132e+06	2.98299e+07	3.02204e+07	3.58738e+07	-1.40208e+08	-6.62715e+07	-8.38595e+07	-8.82578e+07
2087	1.97021e+06	-9.97735e+07	-1.46339e+07	-3.73089e+07	-1.49746e+08	9.4204e+06	-8.41931e+07	2.71144e+06	-2.59072e+07	-9.79685e+07	0	-9.32358e+07	0	-2.2854e+07	-1.1609e+08	-7.0502e+06	-1.03832e+08	3.27628e+06	-1.83513e+07	-1.25957e+08	1.73895e+07	-8.90278e+06	8.48674e+06	8.4169e+07	-4.21053e+07	4.20637e+07	8.668e+07	-4.32573e+07	4.34227e+07	1.03953e+08	-5.1096e+07	5.28574e+07	1.32804e+08	-6.64878e+07	6.63167e+07	-1.41259e+08	-5.59048e+07	-7.26671e+07	-7.30996e+07	6.63167e+07		6.69055e+06	3.0186e+07	3.05682e+07	3.60978e+07	-1.43056e+08	-6.77825e+07	-8.55217e+07	-8.98592e+07
2088	1.20336e+06	-1.01219e+08	-1.44189e+07	-3.85518e+07	-1.52987e+08	9.40595e+06	-8.48429e+07	2.87704e+06	-2.71701e+07	-9.973e+07	0	-9.37796e+07	0	-2.43015e+07	-1.18081e+08	-7.20804e+06	-1.04321e+08	3.4699e+06	-1.9967e+07	-1.28026e+08	1.89059e+07	-9.74107e+06	9.16486e+06	8.6124e+07	-4.31209e+07	4.30031e+07	8.80057e+07	-4.39048e+07	4.41008e+07	1.05377e+08	-5.17836e+07	5.3593e+07	1.36936e+08	-6.8623e+07	6.83131e+07	-1.43822e+08	-5.67269e+07	-7.39803e+07	-7.44332e+07	6.83131e+07		7.08682e+06	3.07127e+07	3.09329e+07	3.64921e+07	-1.459e+08	-6.90173e+07	-8.71482e+07	-9.15341e+07
2089	524992	-1.02552e+08	-1.4206e+07	-3.97928e+07	-1.56026e+08	9.46021e+06	-8.54867e+07	2.69578e+06	-2.843e+07	-1.01761e+08	0	-9.43102e+07	0	-2.5745e+07	-1.20055e+08	-7.37269e+06	-1.04767e+08	3.31669e+06	-2.15772e+07	-1.30401e+08	2.04869e+07	-1.06127e+07	9.87417e+06	8.78978e+07	-4.40291e+07	4.38686e+07	8.93959e+07	-4.45884e+07	4.48074e+07	1.06833e+08	-5.2491e+07	5.43422e+07	1.41132e+08	-7.079e+07	7.03423e+07	-1.46152e+08	-5.7892e+07	-7.52478e+07	-7.60585e+07	7.03423e+07		7.50016e+06	3.11931e+07	3.13147e+07	3.68955e+07	-1.48526e+08	-7.05675e+07	-8.87405e+07	-9.35051e+07
2090	-79106	-1.03904e+08	-1.39316e+07	-4.09805e+07	-1.58895e+08	9.69123e+06	-8.61255e+07	2.87802e+06	-2.96869e+07	-1.03243e+08	0	-9.48287e+07	0	-2.71848e+07	-1.22014e+08	-7.25735e+06	-1.05174e+08	3.51388e+06	-2.31823e+07	-1.321e+08	2.21323e+07	-1.15176e+07	1.06147e+07	8.91418e+07	-4.4626e+07	4.45158e+07	9.08507e+07	-4.53079e+07	4.55427e+07	1.0776e+08	-5.2889e+07	5.48709e+07	1.45393e+08	-7.29888e+07	7.24043e+07	-1.4828e+08	-5.87275e+07	-7.64708e+07	-7.7229e+07	7.24043e+07		7.93058e+06	3.15371e+07	3.17135e+07	3.71623e+07	-1.50964e+08	-7.17061e+07	-9.03e+07	-9.49376e+07
2091	-751352	-1.05172e+08	-1.36592e+07	-4.21664e+07	-1.61749e+08	9.89514e+06	-8.67602e+07	3.06105e+06	-3.09411e+07	-1.04745e+08	0	-9.53363e+07	0	-2.8621e+07	-1.23957e+08	-7.44199e+06	-1.05544e+08	3.70491e+06	-2.47824e+07	-1.34064e+08	2.43548e+07	-1.27525e+07	1.16023e+07	9.11345e+07	-4.56548e+07	4.54797e+07	9.237e+07	-4.60632e+07	4.63068e+07	1.09377e+08	-5.36858e+07	5.56909e+07	1.49718e+08	-7.52194e+07	7.44991e+07	-1.50146e+08	-5.92654e+07	-7.76504e+07	-7.8373e+07	7.44991e+07		8.5105e+06	3.20748e+07	3.21293e+07	3.76077e+07	-1.53238e+08	-7.26703e+07	-9.18279e+07	-9.64563e+07
2092	-1.36332e+06	-1.05172e+08	-1.46669e+07	-4.46486e+07	-1.65851e+08	1.01094e+07	-8.73911e+07	2.89773e+06	-3.21925e+07	-1.06577e+08	0	-9.58337e+07	0	-3.00536e+07	-1.25887e+08	-7.63044e+06	-1.05881e+08	3.54965e+06	-2.63779e+07	-1.3634e+08	2.66418e+07	-1.40192e+07	1.26226e+07	9.31917e+07	-4.67202e+07	4.64715e+07	9.39538e+07	-4.6854e+07	4.70998e+07	1.11027e+08	-5.45022e+07	5.65247e+07	1.54108e+08	-7.74817e+07	7.66266e+07	-1.53228e+08	-6.01051e+07	-7.87875e+07	-7.98152e+07	7.66266e+07		9.10767e+06	3.26297e+07	3.25623e+07	3.80621e+07	-1.56743e+08	-7.39468e+07	-9.3325e+07	-9.82778e+07
2093	-911179	-1.05074e+08	-1.56707e+07	-4.71236e+07	-1.68779e+08	1.00828e+07	-8.80937e+07	2.74109e+06	-3.34412e+07	-1.08711e+08	0	-9.63133e+07	0	-3.14867e+07	-1.278e+08	-7.53541e+06	-1.06262e+08	3.40113e+06	-2.79377e+07	-1.38334e+08	2.45433e+07	-1.27392e+07	1.18041e+07	9.47191e+07	-4.74746e+07	4.72445e+07	9.56022e+07	-4.76803e+07	4.79219e+07	1.12147e+08	-5.50088e+07	5.71384e+07	1.58563e+08	-7.97757e+07	7.8787e+07	-1.56975e+08	-6.14665e+07	-7.98781e+07	-8.11959e+07	7.8787e+07		8.57229e+06	3.30483e+07	3.30123e+07	3.83801e+07	-1.60207e+08	-7.56627e+07	-9.47877e+07	-9.99543e+07
2094	-387757	-1.049e+08	-1.6661e+07	-4.95813e+07	-1.7153e+08	1.00117e+07	-8.88038e+07	2.93113e+06	-3.46873e+07	-1.10548e+08	0	-9.67834e+07	0	-3.29164e+07	-1.297e+08	-7.4392e+06	-1.06626e+08	3.59236e+06	-2.94933e+07	-1.39966e+08	2.25095e+07	-1.15007e+07	1.10087e+07	9.64813e+07	-4.83622e+07	4.81191e+07	9.72984e+07	-4.85321e+07	4.87662e+07	1.13502e+08	-5.56503e+07	5.78522e+07	1.63082e+08	-8.21015e+07	8.09802e+07	-1.60521e+08	-6.24292e+07	-8.09335e+07	-8.21143e+07	8.09802e+07		8.05306e+06	3.35279e+07	3.3475e+07	3.8759e+07	-1.63477e+08	-7.70204e+07	-9.62248e+07	-1.01207e+08
2095	188367	-1.04671e+08	-1.76404e+07	-5.20246e+07	-1.74148e+08	9.9155e+06	-8.95195e+07	2.77773e+06	-3.59309e+07	-1.12757e+08	0	-9.72445e+07	0	-3.43429e+07	-1.31587e+08	-7.61138e+06	-1.06974e+08	3.44022e+06	-3.10447e+07	-1.4219e+08	2.05401e+07	-1.03239e+07	1.02163e+07	9.89024e+07	-4.96311e+07	4.92713e+07	9.90591e+07	-4.94192e+07	4.96398e+07	1.15485e+08	-5.66563e+07	5.88291e+07	1.67665e+08	-8.4459e+07	8.32061e+07	-1.63931e+08	-6.34859e+07	-8.19475e+07	-8.33607e+07	8.32061e+07		7.54998e+06	3.41782e+07	3.39549e+07	3.93004e+07	-1.66598e+08	-7.85791e+07	-9.76325e+07	-1.02889e+08
2096	800959	-1.04404e+08	-1.8611e+07	-5.44556e+07	-1.7667e+08	9.79678e+06	-9.02439e+07	2.62349e+06	-3.71721e+07	-1.14996e+08	0	-9.76972e+07	0	-3.57662e+07	-1.33463e+08	-7.50259e+06	-1.07306e+08	3.29427e+06	-3.25922e+07	-1.44106e+08	1.86353e+07	-9.2035e+06	9.43183e+06	1.00794e+08	-5.05902e+07	5.02035e+07	1.00884e+08	-5.03416e+07	5.05427e+07	1.16938e+08	-5.7354e+07	5.95845e+07	1.72313e+08	-8.68482e+07	8.54649e+07	-1.67238e+08	-6.47921e+07	-8.29207e+07	-8.45219e+07	8.54649e+07		7.06307e+06	3.46922e+07	3.44519e+07	3.97055e+07	-1.69607e+08	-8.03035e+07	-9.90115e+07	-1.04401e+08
2097	1.43567e+06	-1.04116e+08	-1.95743e+07	-5.68761e+07	-1.79131e+08	9.65863e+06	-9.09675e+07	2.81552e+06	-3.84108e+07	-1.16904e+08	0	-9.8142e+07	0	-3.71865e+07	-1.35328e+08	-7.39462e+06	-1.07623e+08	3.48766e+06	-3.41357e+07	-1.45666e+08	1.67951e+07	-8.13558e+06	8.65949e+06	1.0275e+08	-5.15822e+07	5.11674e+07	1.02774e+08	-5.12992e+07	5.14749e+07	1.18487e+08	-5.81041e+07	6.03832e+07	1.77026e+08	-8.92691e+07	8.77565e+07	-1.70471e+08	-6.57367e+07	-8.38535e+07	-8.5283e+07	8.77565e+07		6.59234e+06	3.52234e+07	3.49661e+07	4.01356e+07	-1.72538e+08	-8.16807e+07	-1.00362e+08	-1.05531e+08
2098	2.15695e+06	-1.03739e+08	-2.05315e+07	-5.92873e+07	-1.81401e+08	9.60058e+06	-9.16887e+07	2.98079e+06	-3.96472e+07	-1.18755e+08	0	-9.85793e+07	0	-3.86037e+07	-1.37183e+08	-7.55757e+06	-1.07844e+08	3.68146e+06	-3.57106e+07	-1.47431e+08	1.50193e+07	-7.11707e+06	7.90228e+06	1.05364e+08	-5.29542e+07	5.24101e+07	1.04728e+08	-5.22918e+07	5.24366e+07	1.20664e+08	-5.92176e+07	6.14462e+07	1.81803e+08	-9.17218e+07	9.0081e+07	-1.73498e+08	-6.63445e+07	-8.47464e+07	-8.59845e+07	9.0081e+07		6.13783e+06	3.59254e+07	3.54974e+07	4.07284e+07	-1.75263e+08	-8.28292e+07	-1.01686e+08	-1.06702e+08
2099	2.95534e+06	-1.03283e+08	-2.14837e+07	-6.16904e+07	-1.83502e+08	9.62684e+06	-9.24061e+07	2.7994e+06	-4.08813e+07	-1.20861e+08	0	-9.90095e+07	0	-4.0018e+07	-1.39027e+08	-7.73976e+06	-1.0804e+08	3.53563e+06	-3.72818e+07	-1.49526e+08	1.33082e+07	-6.14553e+06	7.16263e+06	1.07923e+08	-5.42904e+07	5.36322e+07	1.06747e+08	-5.33194e+07	5.34279e+07	1.22749e+08	-6.02762e+07	6.24729e+07	1.86644e+08	-9.42061e+07	9.24383e+07	-1.76339e+08	-6.7229e+07	-8.55996e+07	-8.70529e+07	9.24383e+07		5.69953e+06	3.66134e+07	3.60459e+07	4.12981e+07	-1.77802e+08	-8.42478e+07	-1.02982e+08	-1.08228e+08
2100	3.8223e+06	-1.02758e+08	-2.24317e+07	-6.40862e+07	-1.85453e+08	9.83283e+06	-9.31186e+07	2.98159e+06	-4.21133e+07	-1.22417e+08	0	-9.94327e+07	0	-4.14295e+07	-1.40862e+08	-7.6573e+06	-1.08214e+08	3.72628e+06	-3.88494e+07	-1.50994e+08	1.16615e+07	-5.21908e+06	6.44244e+06	1.09951e+08	-5.53141e+07	5.4637e+07	1.08831e+08	-5.43819e+07	5.44488e+07	1.24336e+08	-6.10417e+07	6.32939e+07	1.91551e+08	-9.67221e+07	9.48284e+07	-1.79011e+08	-6.77805e+07	-8.64134e+07	-8.77005e+07	9.48284e+07		5.27747e+06	3.71652e+07	3.66115e+07	4.17395e+07	-1.80176e+08	-8.52523e+07	-1.04251e+08	-1.09255e+08
2101	4.75013e+06	-1.02171e+08	-2.33758e+07	-6.64753e+07	-1.87272e+08	1.00145e+07	-9.38254e+07	3.16469e+06	-4.33431e+07	-1.23989e+08	0	-9.98539e+07	0	-4.28382e+07	-1.42692e+08	-7.84237e+06	-1.08369e+08	3.91791e+06	-4.04134e+07	-1.52707e+08	1.00794e+07	-4.33621e+06	5.7432e+06	1.12728e+08	-5.67679e+07	5.59603e+07	1.10979e+08	-5.54792e+07	5.54995e+07	1.2655e+08	-6.21687e+07	6.43811e+07	1.96521e+08	-9.92699e+07	9.72514e+07	-1.81529e+08	-6.80289e+07	-8.71927e+07	-8.83258e+07	9.72514e+07		4.87166e+06	3.7911e+07	3.71944e+07	4.23435e+07	-1.82401e+08	-8.60783e+07	-1.05498e+08	-1.10363e+08
2102	5.73189e+06	-1.01532e+08	-2.43167e+07	-6.88582e+07	-1.88975e+08	1.02101e+07	-9.45177e+07	3.00157e+06	-4.32147e+07	-1.24521e+08	0	-1.00261e+08	0	-4.42442e+07	-1.44505e+08	-8.04384e+06	-1.08503e+08	3.77036e+06	-4.19741e+07	-1.5475e+08	8.56184e+06	-3.49573e+06	5.06611e+06	1.1557e+08	-5.8257e+07	5.7313e+07	1.13191e+08	-5.66112e+07	5.658e+07	1.28829e+08	-6.33326e+07	6.54961e+07	2.01556e+08	-1.01849e+08	9.97072e+07	-1.83909e+08	-6.72077e+07	-8.79252e+07	-8.9254e+07	9.97072e+07		4.48213e+06	3.86741e+07	3.77946e+07	4.29648e+07	-1.84493e+08	-8.58466e+07	-1.06711e+08	-1.11785e+08
2103	6.75771e+06	-1.00849e+08	-2.52547e+07	-7.12355e+07	-1.90581e+08	1.01667e+07	-9.52029e+07	2.84509e+06	-4.30901e+07	-1.25281e+08	0	-1.00662e+08	0	-4.56475e+07	-1.46309e+08	-7.97819e+06	-1.08624e+08	3.61554e+06	-4.35314e+07	-1.56518e+08	7.10881e+06	-2.6967e+06	4.41211e+06	1.17882e+08	-5.94335e+07	5.84484e+07	1.15468e+08	-5.77778e+07	5.76904e+07	1.30609e+08	-6.42041e+07	6.64047e+07	2.06656e+08	-1.0446e+08	1.02196e+08	-1.86169e+08	-6.68329e+07	-8.86188e+07	-9.01136e+07	1.02196e+08		4.10888e+06	3.93011e+07	3.84119e+07	4.34577e+07	-1.86472e+08	-8.59802e+07	-1.07897e+08	-1.13061e+08
2104	7.82187e+06	-1.00128e+08	-2.61901e+07	-7.36075e+07	-1.92104e+08	1.00812e+07	-9.58809e+07	3.03539e+06	-4.298e+07	-1.25744e+08	0	-1.01056e+08	0	-4.70483e+07	-1.48104e+08	-7.87749e+06	-1.08736e+08	3.80755e+06	-4.50854e+07	-1.57892e+08	5.72032e+06	-1.93835e+06	3.78196e+06	1.20289e+08	-6.06615e+07	5.9628e+07	1.1781e+08	-5.89789e+07	5.88308e+07	1.32422e+08	-6.50928e+07	6.73296e+07	2.11821e+08	-1.07103e+08	1.04717e+08	-1.88322e+08	-6.61164e+07	-8.92737e+07	-9.05622e+07	1.04717e+08		3.75193e+06	3.99534e+07	3.90465e+07	4.39598e+07	-1.88352e+08	-8.5791e+07	-1.09058e+08	-1.13932e+08
2105	8.91921e+06	-9.93766e+07	-2.71231e+07	-7.59745e+07	-1.93555e+08	9.97207e+06	-9.65521e+07	2.88232e+06	-4.28815e+07	-1.26579e+08	0	-1.01445e+08	0	-4.84467e+07	-1.49891e+08	-8.05783e+06	-1.08841e+08	3.66325e+06	-4.66363e+07	-1.59872e+08	4.39636e+06	-1.22006e+06	3.1763e+06	1.23356e+08	-6.227e+07	6.1086e+07	1.20216e+08	-6.02146e+07	6.00012e+07	1.34895e+08	-6.63636e+07	6.85312e+07	2.17049e+08	-1.09778e+08	1.07272e+08	-1.90379e+08	-6.54932e+07	-8.98903e+07	-9.13404e+07	1.07272e+08		3.41131e+06	4.07766e+07	3.96984e+07	4.46326e+07	-1.90144e+08	-8.58026e+07	-1.10193e+08	-1.15239e+08
2106	1.00451e+07	-9.8598e+07	-2.80538e+07	-7.83368e+07	-1.94944e+08	9.84166e+06	-9.72163e+07	2.72835e+06	-4.27925e+07	-1.27439e+08	0	-1.01828e+08	0	-4.98426e+07	-1.51671e+08	-7.97364e+06	-1.08943e+08	3.51111e+06	-4.81841e+07	-1.6159e+08	3.13694e+06	-541304	2.59564e+06	1.25893e+08	-6.35685e+07	6.23242e+07	1.22686e+08	-6.14846e+07	6.12018e+07	1.36869e+08	-6.73445e+07	6.95241e+07	2.22343e+08	-1.12484e+08	1.09859e+08	-1.92348e+08	-6.51146e+07	-9.04688e+07	-9.20655e+07	1.09859e+08		3.08702e+06	4.14636e+07	4.03676e+07	4.51772e+07	-1.91857e+08	-8.59752e+07	-1.11303e+08	-1.16412e+08
2107	1.11953e+07	-9.89597e+07	-2.77051e+07	-7.94239e+07	-1.94893e+08	9.69196e+06	-9.78684e+07	2.92071e+06	-4.27113e+07	-1.27967e+08	0	-1.02202e+08	0	-5.12363e+07	-1.53439e+08	-7.85653e+06	-1.09037e+08	3.70537e+06	-4.97289e+07	-1.62917e+08	1.94207e+06	98345.5	2.04041e+06	1.28494e+08	-6.48996e+07	6.35943e+07	1.25222e+08	-6.2789e+07	6.24326e+07	1.38876e+08	-6.83416e+07	7.05341e+07	2.27701e+08	-1.15222e+08	1.12479e+08	-1.92853e+08	-6.43727e+07	-9.1006e+07	-9.23825e+07	1.12479e+08		2.77908e+06	4.2168e+07	4.10541e+07	4.57309e+07	-1.92114e+08	-8.5799e+07	-1.12384e+08	-1.17186e+08
2108	1.12137e+07	-9.95806e+07	-2.736e+07	-8.05121e+07	-1.96239e+08	9.62316e+06	-9.8512e+07	3.08635e+06	-4.26366e+07	-1.28439e+08	0	-1.02572e+08	0	-5.26276e+07	-1.55199e+08	-8.02224e+06	-1.09126e+08	3.90707e+06	-5.12707e+07	-1.64512e+08	5.2131e+06	-1.84887e+06	3.36423e+06	1.31754e+08	-6.66106e+07	6.51434e+07	1.27821e+08	-6.41277e+07	6.36936e+07	1.41542e+08	-6.97201e+07	7.18217e+07	2.33123e+08	-1.17992e+08	1.15131e+08	-1.92875e+08	-6.32956e+07	-9.15056e+07	-9.269e+07	1.15131e+08		3.62477e+06	4.30433e+07	4.17579e+07	4.64553e+07	-1.92614e+08	-8.53957e+07	-1.13441e+08	-1.18056e+08
2109	1.09849e+07	-1.00431e+08	-2.70284e+07	-8.16116e+07	-1.98086e+08	9.63945e+06	-9.91472e+07	2.90531e+06	-4.25674e+07	-1.2917e+08	0	-1.02936e+08	0	-5.40168e+07	-1.56953e+08	-8.22466e+06	-1.09211e+08	3.76212e+06	-5.28098e+07	-1.66483e+08	8.54867e+06	-3.82349e+06	4.72519e+06	1.34958e+08	-6.82853e+07	6.66724e+07	1.30486e+08	-6.55006e+07	6.4985e+07	1.44304e+08	-7.11521e+07	7.31514e+07	2.3861e+08	-1.20793e+08	1.17817e+08	-1.93361e+08	-6.24975e+07	-9.1968e+07	-9.3332e+07	1.17817e+08		4.48797e+06	4.39049e+07	4.24791e+07	4.72052e+07	-1.93598e+08	-8.5265e+07	-1.14474e+08	-1.19278e+08
2110	1.05412e+07	-1.01342e+08	-2.67714e+07	-8.27842e+07	-2.00357e+08	9.83654e+06	-9.9774e+07	3.08784e+06	-4.25031e+07	-1.29353e+08	0	-1.03296e+08	0	-5.54039e+07	-1.587e+08	-8.14571e+06	-1.09293e+08	3.95365e+06	-5.43461e+07	-1.67831e+08	1.19488e+07	-5.8055e+06	6.14329e+06	1.37632e+08	-6.96471e+07	6.79845e+07	1.33214e+08	-6.69076e+07	6.63067e+07	1.46535e+08	-7.22722e+07	7.42632e+07	2.44162e+08	-1.23627e+08	1.20535e+08	-1.94214e+08	-6.13682e+07	-9.23933e+07	-9.35678e+07	1.20535e+08		5.36871e+06	4.46303e+07	4.32176e+07	4.78189e+07	-1.94988e+08	-8.47224e+07	-1.15482e+08	-1.20012e+08
2111	1.00411e+07	-1.02428e+08	-2.65233e+07	-8.39634e+07	-2.02874e+08	1.00104e+07	-1.00393e+08	3.27134e+06	-4.2443e+07	-1.29554e+08	0	-1.03652e+08	0	-5.67889e+07	-1.60441e+08	-8.33218e+06	-1.09372e+08	4.1532e+06	-5.58797e+07	-1.6943e+08	1.48426e+07	-7.4696e+06	7.37304e+06	1.41054e+08	-7.14385e+07	6.96157e+07	1.36008e+08	-6.83487e+07	6.7659e+07	1.49395e+08	-7.37524e+07	7.56427e+07	2.49778e+08	-1.26492e+08	1.23286e+08	-1.95501e+08	-5.99382e+07	-9.27818e+07	-9.37876e+07	1.23286e+08		6.1195e+06	4.555e+07	4.39735e+07	4.85953e+07	-1.96754e+08	-8.40039e+07	-1.16467e+08	-1.20835e+08
2112	9.36971e+06	-1.03519e+08	-2.62826e+07	-8.51479e+07	-2.0558e+08	1.01992e+07	-9.97584e+07	3.10856e+06	-4.37752e+07	-1.30226e+08	0	-1.03998e+08	0	-5.81719e+07	-1.6217e+08	-8.55245e+06	-1.09444e+08	4.00654e+06	-5.74108e+07	-1.71401e+08	1.7801e+07	-9.15165e+06	8.64939e+06	1.44541e+08	-7.32647e+07	7.12766e+07	1.38866e+08	-6.98238e+07	6.90417e+07	1.5235e+08	-7.52863e+07	7.70642e+07	2.55458e+08	-1.29388e+08	1.2607e+08	-1.9693e+08	-5.89493e+07	-9.31282e+07	-9.43365e+07	1.2607e+08		6.88771e+06	4.64871e+07	4.47468e+07	4.93972e+07	-1.98692e+08	-8.37387e+07	-1.17423e+08	-1.22003e+08
2113	8.68873e+06	-1.04602e+08	-2.60482e+07	-8.63367e+07	-2.08298e+08	1.02499e+07	-9.89535e+07	2.95243e+06	-4.51049e+07	-1.30856e+08	0	-1.0434e+08	0	-5.95531e+07	-1.63893e+08	-8.48891e+06	-1.09516e+08	3.8526e+06	-5.89393e+07	-1.73091e+08	2.0824e+07	-1.08572e+07	9.96676e+06	1.451e+08	-7.33893e+07	7.17107e+07	1.41788e+08	-7.13328e+07	7.04551e+07	1.54776e+08	-7.65085e+07	7.82675e+07	2.61204e+08	-1.32317e+08	1.28887e+08	-1.98331e+08	-5.91454e+07	-9.3438e+07	-9.48238e+07	1.28887e+08		7.67336e+06	4.66685e+07	4.55375e+07	5.0063e+07	-2.00625e+08	-8.41875e+07	-1.18356e+08	-1.23028e+08
2114	8.00955e+06	-1.05666e+08	-2.58191e+07	-8.75288e+07	-2.11004e+08	1.02852e+07	-9.79966e+07	3.14308e+06	-4.6421e+07	-1.30989e+08	0	-1.04678e+08	0	-6.09324e+07	-1.6561e+08	-8.38791e+06	-1.09587e+08	4.04551e+06	-6.04654e+07	-1.74395e+08	2.39114e+07	-1.25876e+07	1.13238e+07	1.45754e+08	-7.35709e+07	7.21835e+07	1.44775e+08	-7.28758e+07	7.1899e+07	1.57235e+08	-7.77469e+07	7.94881e+07	2.67013e+08	-1.35277e+08	1.31736e+08	-1.9968e+08	-5.88057e+07	-9.37115e+07	-9.49068e+07	1.31736e+08		8.47646e+06	4.68748e+07	4.63456e+07	5.0738e+07	-2.02528e+08	-8.41145e+07	-1.19265e+08	-1.23657e+08
2115	7.34245e+06	-1.06701e+08	-2.55945e+07	-8.87235e+07	-2.13677e+08	1.0469e+07	-9.69034e+07	2.99035e+06	-4.77262e+07	-1.3117e+08	0	-1.05012e+08	0	-6.23099e+07	-1.67322e+08	-8.56868e+06	-1.09658e+08	3.9021e+06	-6.19891e+07	-1.76314e+08	2.70634e+07	-1.43444e+07	1.27191e+07	1.47068e+08	-7.41492e+07	7.29186e+07	1.47826e+08	-7.44526e+07	7.33737e+07	1.60353e+08	-7.93665e+07	8.09863e+07	2.72887e+08	-1.3827e+08	1.34618e+08	-2.00958e+08	-5.82517e+07	-9.39487e+07	-9.53278e+07	1.34618e+08		9.29702e+06	4.72515e+07	4.71712e+07	5.15839e+07	-2.0438e+08	-8.39188e+07	-1.20151e+08	-1.2473e+08
2116	6.6967e+06	-1.07699e+08	-2.53739e+07	-8.99205e+07	-2.16297e+08	1.06607e+07	-9.5688e+07	2.83671e+06	-4.90227e+07	-1.31213e+08	0	-1.05343e+08	0	-6.36858e+07	-1.69029e+08	-8.48263e+06	-1.0973e+08	3.75085e+06	-6.35106e+07	-1.77972e+08	3.028e+07	-1.61285e+07	1.41515e+07	1.47851e+08	-7.44309e+07	7.34204e+07	1.50942e+08	-7.60632e+07	7.48791e+07	1.62972e+08	-8.06953e+07	8.22766e+07	2.78826e+08	-1.41294e+08	1.37533e+08	-2.02145e+08	-5.77929e+07	-9.41499e+07	-9.56956e+07	1.37533e+08		1.01351e+07	4.74917e+07	4.80142e+07	5.23018e+07	-2.06162e+08	-8.37216e+07	-1.21015e+08	-1.2567e+08
2117	6.0807e+06	-1.08732e+08	-2.5157e+07	-9.11193e+07	-2.18927e+08	1.08591e+07	-9.55808e+07	3.0294e+06	-5.03121e+07	-1.32004e+08	0	-1.05664e+08	0	-6.506e+07	-1.70724e+08	-8.36172e+06	-1.09796e+08	3.946e+06	-6.50299e+07	-1.79242e+08	3.35611e+07	-1.79406e+07	1.56205e+07	1.48699e+08	-7.47563e+07	7.3943e+07	1.54123e+08	-7.77076e+07	7.64153e+07	1.65624e+08	-8.20396e+07	8.35848e+07	2.8483e+08	-1.44349e+08	1.4048e+08	-2.03307e+08	-5.80614e+07	-9.43089e+07	-9.56572e+07	1.4048e+08		1.09906e+07	4.77487e+07	4.88747e+07	5.30289e+07	-2.07937e+08	-8.42557e+07	-1.2185e+08	-1.26213e+08
2118	5.42479e+06	-1.09794e+08	-2.49433e+07	-9.23197e+07	-2.21632e+08	1.08133e+07	-9.55412e+07	3.19538e+06	-5.15956e+07	-1.33128e+08	0	-1.05982e+08	0	-6.64327e+07	-1.72414e+08	-8.52387e+06	-1.09864e+08	4.14859e+06	-6.6547e+07	-1.80787e+08	3.69067e+07	-1.97813e+07	1.71254e+07	1.52549e+08	-7.6827e+07	7.57218e+07	1.57368e+08	-7.93856e+07	7.79824e+07	1.68936e+08	-8.37645e+07	8.51714e+07	2.90897e+08	-1.47437e+08	1.4346e+08	-2.04507e+08	-5.74063e+07	-9.44321e+07	-9.56154e+07	1.4346e+08		1.18637e+07	4.87814e+07	4.97527e+07	5.3927e+07	-2.09769e+08	-8.43466e+07	-1.22662e+08	-1.2686e+08
2119	4.73387e+06	-1.10881e+08	-2.47326e+07	-9.35215e+07	-2.24402e+08	1.08147e+07	-9.55609e+07	3.01466e+06	-5.28743e+07	-1.34606e+08	0	-1.06296e+08	0	-6.78039e+07	-1.741e+08	-8.7222e+06	-1.09934e+08	4.00452e+06	-6.80621e+07	-1.82714e+08	4.03169e+07	-2.1651e+07	1.86659e+07	1.56342e+08	-7.88636e+07	7.74782e+07	1.60678e+08	-8.10972e+07	7.95803e+07	1.72343e+08	-8.55422e+07	8.68008e+07	2.9703e+08	-1.50557e+08	1.46473e+08	-2.05736e+08	-5.71275e+07	-9.45196e+07	-9.59131e+07	1.46473e+08		1.27543e+07	4.98006e+07	5.06482e+07	5.48507e+07	-2.11647e+08	-8.48052e+07	-1.23452e+08	-1.27863e+08
2120	4.01242e+06	-1.11989e+08	-2.45247e+07	-9.47246e+07	-2.27226e+08	1.08137e+07	-9.56334e+07	3.19751e+06	-5.41489e+07	-1.35771e+08	0	-1.06607e+08	0	-6.91736e+07	-1.75781e+08	-8.63759e+06	-1.10006e+08	4.19694e+06	-6.95752e+07	-1.84022e+08	4.37916e+07	-2.355e+07	2.02416e+07	1.59605e+08	-8.05777e+07	7.90273e+07	1.64052e+08	-8.28425e+07	8.12093e+07	1.7522e+08	-8.70073e+07	8.8213e+07	3.03227e+08	-1.53708e+08	1.49518e+08	-2.06985e+08	-5.67437e+07	-9.45714e+07	-9.58085e+07	1.49518e+08		1.36624e+07	5.06838e+07	5.15612e+07	5.56383e+07	-2.13564e+08	-8.50872e+07	-1.24219e+08	-1.28383e+08
2121	3.2645e+06	-1.13114e+08	-2.43085e+07	-9.59289e+07	-2.30087e+08	1.07502e+07	-9.57534e+07	3.28834e+06	-5.45842e+07	-1.36299e+08	0	-1.06915e+08	0	-7.0542e+07	-1.77457e+08	-8.81898e+06	-1.10079e+08	4.2898e+06	-7.10865e+07	-1.85695e+08	4.73308e+07	-2.44666e+07	2.28642e+07	1.63617e+08	-8.13977e+07	8.22191e+07	1.6749e+08	-8.34511e+07	8.40394e+07	1.78725e+08	-8.76268e+07	9.10986e+07	3.09488e+08	-1.54754e+08	1.54734e+08	-2.07223e+08	-5.40799e+07	-9.34176e+07	-9.45963e+07	1.54734e+08		1.36624e+07	5.06838e+07	5.15612e+07	5.56383e+07	-2.16424e+08	-8.56152e+07	-1.25896e+08	-1.30057e+08
2122	2.49378e+06	-1.14248e+08	-2.4095e+07	-9.71344e+07	-2.32983e+08	1.06665e+07	-9.59165e+07	3.19107e+06	-5.50125e+07	-1.37071e+08	0	-1.07198e+08	0	-7.19361e+07	-1.79134e+08	-9.03388e+06	-1.10149e+08	4.1945e+06	-7.25959e+07	-1.87584e+08	5.09346e+07	-2.53902e+07	2.55444e+07	1.67693e+08	-8.22233e+07	8.54699e+07	1.70994e+08	-8.40707e+07	8.6923e+07	1.82326e+08	-8.82684e+07	9.40577e+07	3.15814e+08	-1.55805e+08	1.60009e+08	-2.07439e+08	-5.16016e+07	-9.2211e+07	-9.35263e+07	1.60009e+08		1.36624e+07	5.06838e+07	5.15612e+07	5.56383e+07	-2.19321e+08	-8.63876e+07	-1.27573e+08	-1.31946e+08
Currently not planning to use the low Aff planting in the results - haven't modelled marginal imports Forest C impact yet
	Marginal domestic supply impact (HWP - existing forest + Aff_lo + BL)																				Marginal import impact - demand for IRW met															Net impact						Increased use of concrete - demand for IRW not met				Net impact (with increased use of concrete)
	50_35 + Aff35_lo					50_45 + Aff45_lo					50_50 + Aff50_lo					50_55 + Aff55_lo					50_35 + Aff35_lo			50_45 + Aff45_lo			50_50 + Aff50_lo			50_55 + Aff55_lo			Reference			50_35 + Aff35_lo	50_45 + Aff45_lo	50_50 + Aff50_lo	50_55 + Aff55_lo			50_35 + Aff35_lo	50_45 + Aff45_lo	50_50 + Aff50_lo	50_55 + Aff55_lo	50_35 + Aff35_hi	50_45 + Aff45_hi	50_50 + Aff50_hi	50_55 + Aff55_hi
	Ecosystem C		HWP		Total	Ecosystem C		HWP		Total	Ecosystem C		HWP		Total	Ecosystem C		HWP		Total	Ecosystem C	HWP	Total	Ecosystem C	HWP	Total	Ecosystem C	HWP	Total	Ecosystem C	HWP	Total	Ecosystem C	HWP	Total
	Existing forest	New forest	Existing forest	New forest		Existing forest	New forest	Existing forest	New forest		Existing forest	New forest	Existing forest	New forest		Existing forest	New forest	Existing forest	New forest
2023	0	-597398	0	0	-597398	267411	-595531	303742	0	-24378.2	0	-595531	0	0	-595531	0	-595531	303742	0	-291789	0	0	0	0	0	0	0	0	0	-4.73852e-10	2.69843e-10	-2.04009e-10	As above			-597398	-24378.2	-595531	-291789			0	0	0	-1.76023e-10	-597398	-24378.2	-595531	-291789
2024	-6736.99	-1.20374e+06	0	0	-1.21047e+06	556483	-1.19539e+06	298641	0	-340260	0	-1.19539e+06	0	0	-1.19539e+06	-273429	-1.19539e+06	298641	0	-1.17017e+06	64538.2	-36752.4	27785.8	597916	-340494	257422	64538.2	-36752.4	27785.8	597916	-340494	257422				-1.18269e+06	-82838.1	-1.1676e+06	-912751			23974.1	222109	23974.1	222109	-1.1865e+06	-118151	-1.17141e+06	-948064
2025	-23742.5	-1.82392e+06	0	0	-1.84766e+06	862466	-1.80221e+06	291102	0	-648645	0	-1.80221e+06	0	0	-1.80221e+06	-301540	-1.80221e+06	291102	0	-1.81265e+06	193615	-110505	83109.3	714437	-409146	305291	193615	-110505	83109.3	714437	-409146	305291				-1.76455e+06	-343354	-1.7191e+06	-1.50736e+06			72431.3	270108	72431.3	270108	-1.77523e+06	-378537	-1.72978e+06	-1.54254e+06
2026	-54067	-2.46247e+06	0	0	-2.51654e+06	1.18129e+06	-2.41861e+06	595115	0	-642210	0	-2.41861e+06	0	0	-2.41861e+06	-325277	-2.41861e+06	595115	0	-2.14877e+06	387229	-221217	166012	895496	-512319	383178	387229	-221217	166012	895496	-512319	383178				-2.35053e+06	-259032	-2.2526e+06	-1.7656e+06			145880	343000	145880	343000	-2.37066e+06	-299209	-2.27273e+06	-1.80577e+06
2027	-100329	-3.1236e+06	0	0	-3.22393e+06	1.50977e+06	-3.04715e+06	584932	0	-952442	0	-3.04715e+06	0	0	-3.04715e+06	-623235	-3.04715e+06	584932	0	-3.08545e+06	645382	-368926	276456	1.68703e+06	-964041	722986	645382	-368926	276456	1.68703e+06	-964041	722986				-2.94748e+06	-229456	-2.77069e+06	-2.36246e+06			244830	644093	244830	644093	-2.9791e+06	-308349	-2.80232e+06	-2.44136e+06
2028	-164733	-3.81124e+06	0	0	-3.97597e+06	1.60724e+06	-3.69036e+06	569096	0	-1.51403e+06	0	-3.69036e+06	0	0	-3.69036e+06	-668048	-3.69036e+06	569096	0	-3.78931e+06	968073	-550291	417782	1.9868e+06	-1.1316e+06	855197	968073	-550291	417782	1.9868e+06	-1.1316e+06	855197				-3.55819e+06	-658831	-3.27258e+06	-2.93411e+06			366351	761694	366351	761694	-3.60962e+06	-752333	-3.32401e+06	-3.02762e+06
2029	-249084	-4.52901e+06	0	0	-4.77809e+06	1.68858e+06	-4.35076e+06	869109	0	-1.79307e+06	0	-4.35076e+06	0	0	-4.35076e+06	-705614	-4.35076e+06	869109	0	-4.18726e+06	1.3553e+06	-767522	587780	2.35111e+06	-1.333e+06	1.01811e+06	1.3553e+06	-767522	587780	2.35111e+06	-1.333e+06	1.01811e+06				-4.19031e+06	-774957	-3.76298e+06	-3.16915e+06			513014	904339	513014	904339	-4.26508e+06	-888731	-3.83774e+06	-3.28292e+06
2030	-354807	-5.28028e+06	0	0	-5.63508e+06	1.75575e+06	-5.03081e+06	849121	0	-2.42593e+06	0	-5.03081e+06	0	0	-5.03081e+06	-1.01981e+06	-5.03081e+06	849121	0	-5.20149e+06	1.80707e+06	-1.01894e+06	788127	3.33626e+06	-1.88265e+06	1.4536e+06	1.80707e+06	-1.01894e+06	788127	3.33626e+06	-1.88265e+06	1.4536e+06				-4.84696e+06	-972333	-4.24268e+06	-3.74789e+06			680224	1.26657e+06	680224	1.26657e+06	-4.95486e+06	-1.15936e+06	-4.35059e+06	-3.93492e+06
2031	-482969	-6.06813e+06	0	0	-6.5511e+06	1.81033e+06	-5.73294e+06	827254	0	-3.09536e+06	0	-5.73294e+06	0	0	-5.73294e+06	-1.07394e+06	-5.73294e+06	827254	0	-5.97963e+06	2.32337e+06	-1.30587e+06	1.01751e+06	3.81929e+06	-2.14959e+06	1.6697e+06	2.32337e+06	-1.30587e+06	1.01751e+06	3.81929e+06	-2.14959e+06	1.6697e+06				-5.53359e+06	-1.42565e+06	-4.71543e+06	-4.30993e+06			872342	1.45282e+06	872342	1.45282e+06	-5.67876e+06	-1.64253e+06	-4.8606e+06	-4.52681e+06
2032	-634319	-6.89541e+06	0	0	-7.52973e+06	1.85358e+06	-6.45952e+06	1.12564e+06	0	-3.4803e+06	0	-6.45952e+06	0	0	-6.45952e+06	-1.1187e+06	-6.45952e+06	1.12564e+06	0	-6.45258e+06	2.90422e+06	-1.62829e+06	1.27593e+06	4.36687e+06	-2.45014e+06	1.91673e+06	2.90422e+06	-1.62829e+06	1.27593e+06	4.36687e+06	-2.45014e+06	1.91673e+06				-6.2538e+06	-1.56357e+06	-5.18359e+06	-4.53585e+06			1.08962e+06	1.66411e+06	1.08962e+06	1.66411e+06	-6.44011e+06	-1.81619e+06	-5.36989e+06	-4.78847e+06
2033	-809318	-7.76471e+06	0	0	-8.57403e+06	2.15397e+06	-7.21283e+06	1.39752e+06	0	-3.66134e+06	0	-7.21283e+06	0	0	-7.21283e+06	-1.44309e+06	-7.21283e+06	1.39752e+06	0	-7.25841e+06	3.5496e+06	-1.98206e+06	1.56754e+06	5.54563e+06	-3.09997e+06	2.44566e+06	3.5496e+06	-1.98206e+06	1.56754e+06	5.54563e+06	-3.09997e+06	2.44566e+06				-7.00649e+06	-1.21568e+06	-5.64529e+06	-4.81275e+06			1.32818e+06	2.0972e+06	1.32818e+06	2.0972e+06	-7.24585e+06	-1.56414e+06	-5.88466e+06	-5.16121e+06
2034	-1.00818e+06	-8.67838e+06	0	0	-9.68656e+06	2.46666e+06	-7.9951e+06	1.36028e+06	0	-4.16817e+06	0	-7.9951e+06	0	0	-7.9951e+06	-1.77448e+06	-7.9951e+06	1.36028e+06	0	-8.40931e+06	4.25952e+06	-2.37052e+06	1.88899e+06	6.74533e+06	-3.76032e+06	2.98501e+06	4.25952e+06	-2.37052e+06	1.88899e+06	6.74533e+06	-3.76032e+06	2.98501e+06				-7.79757e+06	-1.18316e+06	-6.10611e+06	-5.4243e+06			1.59158e+06	2.54105e+06	1.59158e+06	2.54105e+06	-8.09498e+06	-1.62711e+06	-6.40352e+06	-5.86825e+06
2035	-1.2309e+06	-9.63858e+06	0	0	-1.08695e+07	2.78765e+06	-8.80845e+06	1.64619e+06	0	-4.3746e+06	0	-8.80845e+06	0	0	-8.80845e+06	-1.84949e+06	-8.80845e+06	1.64619e+06	0	-9.01175e+06	5.03398e+06	-2.79364e+06	2.24034e+06	7.46362e+06	-4.14619e+06	3.31744e+06	5.03398e+06	-2.79364e+06	2.24034e+06	7.46362e+06	-4.14619e+06	3.31744e+06				-8.62914e+06	-1.05716e+06	-6.56811e+06	-5.69431e+06			1.88e+06	2.81635e+06	1.88e+06	2.81635e+06	-8.98948e+06	-1.55825e+06	-6.92845e+06	-6.19539e+06
2036	-1.47729e+06	-1.06472e+07	0	0	-1.21245e+07	3.11357e+06	-9.6549e+06	1.90999e+06	0	-4.63134e+06	0	-9.6549e+06	0	0	-9.6549e+06	-2.20318e+06	-9.6549e+06	1.90999e+06	0	-9.94809e+06	5.87297e+06	-3.25137e+06	2.62161e+06	8.82344e+06	-4.88983e+06	3.93361e+06	5.87297e+06	-3.25137e+06	2.62161e+06	8.82344e+06	-4.88983e+06	3.93361e+06				-9.50292e+06	-697729	-7.03329e+06	-6.01447e+06			2.19363e+06	3.32273e+06	2.19363e+06	3.32273e+06	-9.9309e+06	-1.30861e+06	-7.46127e+06	-6.62535e+06
2037	-1.74702e+06	-1.17061e+07	0	0	-1.34531e+07	3.44184e+06	-1.05364e+07	1.8594e+06	0	-5.23514e+06	0	-1.05364e+07	0	0	-1.05364e+07	-2.55863e+06	-1.05364e+07	1.8594e+06	0	-1.12356e+07	6.77651e+06	-3.74368e+06	3.03283e+06	1.02064e+07	-5.64594e+06	4.56049e+06	6.77651e+06	-3.74368e+06	3.03283e+06	1.02064e+07	-5.64594e+06	4.56049e+06				-1.04203e+07	-674648	-7.50355e+06	-6.67512e+06			2.53264e+06	3.84118e+06	2.53264e+06	3.84118e+06	-1.09205e+07	-1.39396e+06	-8.00374e+06	-7.39443e+06
2038	-2.0396e+06	-1.28167e+07	0	0	-1.48563e+07	3.53232e+06	-1.14547e+07	1.80823e+06	0	-6.11417e+06	0	-1.14547e+07	0	0	-1.14547e+07	-2.64852e+06	-1.14547e+07	1.80823e+06	0	-1.2295e+07	7.74458e+06	-4.27056e+06	3.47402e+06	1.10977e+07	-6.12223e+06	4.97543e+06	7.74458e+06	-4.27056e+06	3.47402e+06	1.10977e+07	-6.12223e+06	4.97543e+06				-1.13823e+07	-1.13874e+06	-7.9807e+06	-7.31959e+06			2.89722e+06	4.18788e+06	2.89722e+06	4.18788e+06	-1.19591e+07	-1.92629e+06	-8.5575e+06	-8.10714e+06
2039	-2.45827e+06	-1.40334e+07	0	0	-1.64916e+07	3.60043e+06	-1.24116e+07	2.07179e+06	0	-6.73941e+06	0	-1.24116e+07	0	0	-1.24116e+07	-2.72013e+06	-1.24116e+07	2.07179e+06	0	-1.306e+07	8.77719e+06	-4.83199e+06	3.9452e+06	1.20534e+07	-6.63249e+06	5.42094e+06	8.77719e+06	-4.83199e+06	3.9452e+06	1.20534e+07	-6.63249e+06	5.42094e+06				-1.25464e+07	-1.31847e+06	-8.46643e+06	-7.63903e+06			3.28754e+06	4.56011e+06	3.28754e+06	4.56011e+06	-1.32041e+07	-2.17931e+06	-9.12409e+06	-8.49987e+06
2040	-2.98515e+06	-1.52911e+07	-67835.4	-28090.8	-1.83722e+07	3.64856e+06	-1.34087e+07	2.01776e+06	0	-7.74238e+06	0	-1.34087e+07	0	0	-1.34087e+07	-3.05849e+06	-1.34087e+07	2.01776e+06	0	-1.44494e+07	9.87434e+06	-5.42373e+06	4.45061e+06	1.363e+07	-7.48602e+06	6.144e+06	9.87434e+06	-5.42373e+06	4.45061e+06	1.363e+07	-7.48602e+06	6.144e+06				-1.39216e+07	-1.59838e+06	-8.9581e+06	-8.30543e+06			3.69098e+06	5.13844e+06	3.69098e+06	5.13844e+06	-1.46812e+07	-2.60394e+06	-9.71772e+06	-9.31099e+06
2041	-3.47445e+06	-1.66411e+07	-135996	-56331.2	-2.03078e+07	3.67872e+06	-1.44474e+07	1.96259e+06	0	-8.80613e+06	0	-1.44474e+07	0	0	-1.44474e+07	-3.12785e+06	-1.44474e+07	1.96259e+06	0	-1.56127e+07	1.06382e+07	-5.82726e+06	4.81097e+06	1.47045e+07	-8.05794e+06	6.64658e+06	1.1036e+07	-6.04968e+06	4.98635e+06	1.47045e+07	-8.05794e+06	6.64658e+06				-1.54969e+07	-2.15954e+06	-9.46109e+06	-8.96612e+06			3.98138e+06	5.54626e+06	4.11962e+06	5.54626e+06	-1.63265e+07	-3.25987e+06	-1.03278e+07	-1.00664e+07
2042	-4.0515e+06	-1.80835e+07	-204493	-84060.2	-2.24236e+07	3.69259e+06	-1.55292e+07	2.22604e+06	0	-9.61057e+06	0	-1.55292e+07	0	0	-1.55292e+07	-3.17971e+06	-1.55292e+07	2.22604e+06	0	-1.64829e+07	1.14667e+07	-6.26549e+06	5.20119e+06	1.58436e+07	-8.6629e+06	7.18065e+06	1.22623e+07	-6.70981e+06	5.55244e+06	1.58436e+07	-8.6629e+06	7.18065e+06				-1.72224e+07	-2.42992e+06	-9.97675e+06	-9.30221e+06			4.29613e+06	5.97921e+06	4.57363e+06	5.97921e+06	-1.81274e+07	-3.63136e+06	-1.09556e+07	-1.05037e+07
2043	-4.56411e+06	-1.95401e+07	-235511	-111702	-2.44514e+07	3.959e+06	-1.66176e+07	2.43445e+06	-16629.2	-1.02408e+07	0	-1.66176e+07	0	-16629.2	-1.66342e+07	-3.50378e+06	-1.66176e+07	2.46336e+06	-16629.2	-1.76746e+07	1.23597e+07	-6.73343e+06	5.62623e+06	1.76138e+07	-9.61105e+06	8.00272e+06	1.3553e+07	-7.39672e+06	6.15629e+06	1.76138e+07	-9.61105e+06	8.00272e+06				-1.88252e+07	-2.23805e+06	-1.04779e+07	-9.67191e+06			4.62866e+06	6.62479e+06	5.04576e+06	6.62479e+06	-1.98227e+07	-3.61598e+06	-1.15885e+07	-1.10498e+07
2044	-5.09301e+06	-2.10101e+07	-266642	-139430	-2.65092e+07	4.31132e+06	-1.77457e+07	2.33554e+06	-33303.9	-1.11322e+07	0	-1.77457e+07	0	-33303.9	-1.7779e+07	-3.82802e+06	-1.77457e+07	2.4009e+06	-33303.9	-1.92061e+07	1.34563e+07	-7.31452e+06	6.14176e+06	1.91977e+07	-1.04529e+07	8.74472e+06	1.4822e+07	-8.06885e+06	6.75316e+06	1.93186e+07	-1.05205e+07	8.79811e+06				-2.03674e+07	-2.38744e+06	-1.10259e+07	-1.0408e+07			5.03362e+06	7.20921e+06	5.51289e+06	7.25118e+06	-2.14756e+07	-3.92295e+06	-1.22661e+07	-1.1955e+07
2045	-5.56397e+06	-2.2493e+07	-297890	-167249	-2.85221e+07	4.69092e+06	-1.89154e+07	2.57959e+06	-50026.5	-1.16949e+07	0	-1.89154e+07	0	-50026.5	-1.89654e+07	-3.90639e+06	-1.89154e+07	2.65259e+06	-50026.5	-2.02192e+07	1.46175e+07	-7.93039e+06	6.68706e+06	2.03002e+07	-1.10214e+07	9.27879e+06	1.61555e+07	-8.77453e+06	7.38101e+06	2.05732e+07	-1.11737e+07	9.39955e+06				-2.1835e+07	-2.41608e+06	-1.15844e+07	-1.08196e+07			5.46314e+06	7.62973e+06	6.00492e+06	7.72473e+06	-2.30589e+07	-4.06514e+06	-1.29605e+07	-1.24945e+07
2046	-5.97287e+06	-2.39882e+07	-329260	-195164	-3.04855e+07	5.03209e+06	-2.0128e+07	2.80155e+06	-66799.6	-1.23612e+07	0	-2.0128e+07	0	-66799.6	-2.01948e+07	-4.24338e+06	-2.0128e+07	2.88222e+06	-66799.6	-2.1556e+07	1.58432e+07	-8.58008e+06	7.26308e+06	2.2134e+07	-1.19962e+07	1.01378e+07	1.75536e+07	-9.51411e+06	8.03951e+06	2.24382e+07	-1.21649e+07	1.02733e+07				-2.32224e+07	-2.2234e+06	-1.21553e+07	-1.12826e+07			5.91736e+06	8.30619e+06	6.52198e+06	8.41254e+06	-2.45681e+07	-4.05499e+06	-1.36728e+07	-1.31434e+07
2047	-6.31614e+06	-2.54951e+07	-360755	-223177	-3.23952e+07	5.37186e+06	-2.1385e+07	2.71088e+06	-83625.5	-1.33858e+07	0	-2.1385e+07	0	-83625.5	-2.14686e+07	-4.57652e+06	-2.1385e+07	2.8067e+06	-83625.5	-2.32384e+07	1.71334e+07	-9.2635e+06	7.8699e+06	2.39909e+07	-1.29831e+07	1.10078e+07	1.90162e+07	-1.02874e+07	8.72879e+06	2.43263e+07	-1.31676e+07	1.11587e+07				-2.45253e+07	-2.37805e+06	-1.27398e+07	-1.20797e+07			6.39639e+06	8.9943e+06	7.06421e+06	9.11207e+06	-2.59988e+07	-4.39154e+06	-1.44044e+07	-1.41263e+07
2048	-6.66795e+06	-2.70538e+07	-392379	-251292	-3.43654e+07	5.47034e+06	-2.26872e+07	2.62727e+06	-100507	-1.46901e+07	0	-2.26872e+07	0	-100507	-2.27877e+07	-4.65572e+06	-2.26872e+07	2.72338e+06	-100507	-2.47201e+07	1.84882e+07	-9.98057e+06	8.50762e+06	2.53561e+07	-1.3691e+07	1.16651e+07	2.05434e+07	-1.10944e+07	9.44897e+06	2.57539e+07	-1.39088e+07	1.18451e+07				-2.58578e+07	-3.02505e+06	-1.33388e+07	-1.2875e+07			6.90037e+06	9.51546e+06	7.63172e+06	9.65552e+06	-2.7465e+07	-5.17467e+06	-1.5156e+07	-1.50646e+07
2049	-7.0277e+06	-2.86645e+07	-424135	-279514	-3.63959e+07	5.52642e+06	-2.40357e+07	2.85678e+06	-117446	-1.57699e+07	0	-2.40357e+07	0	-117446	-2.41531e+07	-4.69768e+06	-2.40357e+07	2.9532e+06	-117446	-2.58976e+07	1.99075e+07	-1.07312e+07	9.17629e+06	2.6817e+07	-1.44495e+07	1.23675e+07	2.21351e+07	-1.19349e+07	1.02002e+07	2.72148e+07	-1.46658e+07	1.2549e+07				-2.72196e+07	-3.40241e+06	-1.3953e+07	-1.33486e+07			7.42942e+06	1.00725e+07	8.22464e+06	1.02134e+07	-2.89664e+07	-5.69742e+06	-1.59285e+07	-1.56843e+07
2050	-7.39495e+06	-3.03278e+07	-453408	-307844	-3.8484e+07	5.55701e+06	-2.5431e+07	2.77144e+06	-134444	-1.7237e+07	0	-2.5431e+07	0	-134444	-2.55655e+07	-5.0018e+06	-2.5431e+07	2.875e+06	-134444	-2.76923e+07	2.13914e+07	-1.14904e+07	9.90098e+06	2.88988e+07	-1.55196e+07	1.33791e+07	2.37913e+07	-1.2781e+07	1.10103e+07	2.92966e+07	-1.57343e+07	1.35623e+07				-2.8583e+07	-3.85787e+06	-1.45552e+07	-1.413e+07	2050 year		7.92076e+06	1.07603e+07	8.77294e+06	1.09017e+07	-3.05632e+07	-6.47667e+06	-1.67925e+07	-1.67905e+07
2051	-7.7695e+06	-3.20438e+07	-482780	-336288	-4.06324e+07	5.56465e+06	-2.68737e+07	2.68514e+06	-151505	-1.87754e+07	0	-2.68737e+07	0	-151505	-2.70252e+07	-5.04956e+06	-2.68737e+07	2.78893e+06	-151505	-2.92858e+07	2.29398e+07	-1.22818e+07	1.0658e+07	3.04784e+07	-1.63138e+07	1.41647e+07	2.5512e+07	-1.36592e+07	1.18529e+07	3.09074e+07	-1.6544e+07	1.43633e+07				-2.99744e+07	-4.61074e+06	-1.51723e+07	-1.49225e+07			8.43431e+06	1.12938e+07	9.34368e+06	1.14455e+07	-3.21981e+07	-7.48157e+06	-1.76815e+07	-1.78403e+07
2052	-8.14678e+06	-3.38167e+07	-512255	-362548	-4.28382e+07	5.55148e+06	-2.837e+07	2.88268e+06	-167300	-2.01032e+07	0	-2.837e+07	0	-167300	-2.85373e+07	-5.06181e+06	-2.837e+07	3.01365e+06	-167300	-3.05855e+07	2.45527e+07	-1.31054e+07	1.14473e+07	3.21226e+07	-1.71388e+07	1.49838e+07	2.72973e+07	-1.45694e+07	1.27279e+07	3.25515e+07	-1.73679e+07	1.51837e+07				-3.13909e+07	-5.11938e+06	-1.58094e+07	-1.54018e+07			8.97016e+06	1.18497e+07	9.93695e+06	1.20019e+07	-3.38681e+07	-8.25351e+06	-1.86004e+07	-1.85836e+07
2053	-8.53109e+06	-3.56997e+07	-541837	-388891	-4.51615e+07	5.78676e+06	-2.99716e+07	3.05692e+06	-183139	-2.1311e+07	0	-2.99716e+07	0	-183139	-3.01547e+07	-5.34173e+06	-2.99716e+07	3.22206e+06	-183139	-3.22744e+07	2.62302e+07	-1.3961e+07	1.22691e+07	3.4277e+07	-1.82406e+07	1.60364e+07	2.91472e+07	-1.55116e+07	1.36356e+07	3.48269e+07	-1.85344e+07	1.62925e+07				-3.28924e+07	-5.27459e+06	-1.65191e+07	-1.59818e+07			9.52838e+06	1.25674e+07	1.05528e+07	1.27581e+07	-3.56331e+07	-8.74361e+06	-1.96019e+07	-1.95163e+07
2054	-8.92299e+06	-3.76061e+07	-571529	-415322	-4.75159e+07	6.10334e+06	-3.15912e+07	2.95131e+06	-199025	-2.27356e+07	0	-3.15912e+07	0	-199025	-3.17902e+07	-5.63691e+06	-3.15912e+07	3.1307e+06	-199025	-3.42964e+07	2.79722e+07	-1.48488e+07	1.31234e+07	3.64524e+07	-1.93512e+07	1.71012e+07	3.10615e+07	-1.64857e+07	1.45758e+07	3.71544e+07	-1.97266e+07	1.74278e+07				-3.43925e+07	-5.63439e+06	-1.72144e+07	-1.68686e+07			1.01091e+07	1.32946e+07	1.11914e+07	1.35337e+07	-3.74068e+07	-9.44096e+06	-2.05988e+07	-2.07628e+07
2055	-9.32297e+06	-3.9569e+07	-601334	-441842	-4.99352e+07	6.44448e+06	-3.32621e+07	3.15953e+06	-214960	-2.3873e+07	0	-3.32621e+07	0	-214960	-3.3477e+07	-5.66915e+06	-3.32621e+07	3.34627e+06	-214960	-3.57999e+07	2.97787e+07	-1.57685e+07	1.40102e+07	3.82361e+07	-2.02435e+07	1.79926e+07	3.30405e+07	-1.74917e+07	1.55487e+07	3.90005e+07	-2.06509e+07	1.83496e+07				-3.5925e+07	-5.88042e+06	-1.79283e+07	-1.74503e+07			1.07123e+07	1.39022e+07	1.18528e+07	1.41617e+07	-3.92229e+07	-9.97082e+06	-2.16242e+07	-2.16382e+07
2056	-9.73151e+06	-4.15885e+07	-631255	-468456	-5.24198e+07	6.74486e+06	-3.4984e+07	3.34627e+06	-230945	-2.51239e+07	0	-3.4984e+07	0	-230945	-3.5215e+07	-5.95632e+06	-3.4984e+07	3.54734e+06	-230945	-3.7624e+07	3.16498e+07	-1.67202e+07	1.49296e+07	4.06613e+07	-2.14819e+07	1.91795e+07	3.50839e+07	-1.85295e+07	1.65544e+07	4.14569e+07	-2.19037e+07	1.95532e+07				-3.74901e+07	-5.94438e+06	-1.86606e+07	-1.80708e+07			1.13382e+07	1.4713e+07	1.25371e+07	1.49833e+07	-4.10815e+07	-1.04109e+07	-2.26779e+07	-2.26407e+07
2057	-1.01491e+07	-4.3083e+07	-1.86369e+06	-1.09318e+06	-5.61889e+07	7.04272e+06	-3.67568e+07	3.2349e+06	-246984	-2.67262e+07	0	-3.67568e+07	0	-246984	-3.70038e+07	-6.25553e+06	-3.67568e+07	3.4434e+06	-246984	-3.9816e+07	3.35854e+07	-1.77038e+07	1.58816e+07	4.31098e+07	-2.27305e+07	2.03793e+07	3.71919e+07	-1.95991e+07	1.75928e+07	4.39677e+07	-2.31837e+07	2.07839e+07				-4.03073e+07	-6.3469e+06	-1.94111e+07	-1.9032e+07			1.19869e+07	1.55343e+07	1.32443e+07	1.58252e+07	-4.42021e+07	-1.11919e+07	-2.37595e+07	-2.39908e+07
2058	-9.42738e+06	-4.45478e+07	-3.09172e+06	-1.71575e+06	-5.87826e+07	7.09688e+06	-3.85784e+07	3.12328e+06	-263077	-2.86213e+07	0	-3.85784e+07	0	-263077	-3.88414e+07	-6.28449e+06	-3.85784e+07	3.33231e+06	-263077	-4.17936e+07	3.22817e+07	-1.69189e+07	1.53628e+07	4.50976e+07	-2.37227e+07	2.13749e+07	3.93644e+07	-2.07005e+07	1.8664e+07	4.59867e+07	-2.41905e+07	2.17961e+07				-4.34199e+07	-7.24635e+06	-2.01775e+07	-1.99975e+07			1.16243e+07	1.62148e+07	1.39746e+07	1.65166e+07	-4.71583e+07	-1.24065e+07	-2.48669e+07	-2.5277e+07
2059	-8.55866e+06	-4.59929e+07	-4.30548e+06	-2.33127e+06	-6.11884e+07	7.10638e+06	-4.04479e+07	3.31734e+06	-279226	-3.03034e+07	0	-4.04479e+07	0	-279226	-4.07272e+07	-6.27393e+06	-4.04479e+07	3.52692e+06	-279226	-4.34742e+07	3.10424e+07	-1.61726e+07	1.48698e+07	4.715e+07	-2.47462e+07	2.24037e+07	4.16015e+07	-2.18335e+07	1.9768e+07	4.8039e+07	-2.52117e+07	2.28273e+07				-4.63185e+07	-7.89972e+06	-2.09592e+07	-2.06468e+07			1.12802e+07	1.69182e+07	1.4728e+07	1.72212e+07	-4.99081e+07	-1.33853e+07	-2.59992e+07	-2.6253e+07
2060	-7.56143e+06	-4.74269e+07	-5.50765e+06	-2.94106e+06	-6.3437e+07	7.08903e+06	-4.23645e+07	3.20354e+06	-295434	-3.23674e+07	0	-4.23645e+07	0	-295434	-4.26599e+07	-6.52529e+06	-4.23645e+07	3.42065e+06	-295434	-4.57646e+07	2.98677e+07	-1.54796e+07	1.43881e+07	4.98232e+07	-2.61069e+07	2.37163e+07	4.39031e+07	-2.29982e+07	2.09049e+07	5.07122e+07	-2.65701e+07	2.41421e+07				-4.90489e+07	-8.65112e+06	-2.1755e+07	-2.16225e+07			1.09546e+07	1.78186e+07	1.55046e+07	1.81228e+07	-5.24824e+07	-1.45488e+07	-2.71553e+07	-2.76417e+07
2061	-6.45183e+06	-4.88198e+07	-6.70035e+06	-3.54618e+06	-6.55182e+07	7.04749e+06	-4.42902e+07	3.08888e+06	-311702	-3.44655e+07	0	-4.42902e+07	0	-311702	-4.46019e+07	-6.51883e+06	-4.42902e+07	3.30661e+06	-311702	-4.78141e+07	2.87575e+07	-1.4836e+07	1.39216e+07	5.19943e+07	-2.71912e+07	2.48031e+07	4.62692e+07	-2.41945e+07	2.20747e+07	5.29145e+07	-2.76695e+07	2.5245e+07				-5.15966e+07	-9.66246e+06	-2.25272e+07	-2.25691e+07			1.06477e+07	1.85656e+07	1.63046e+07	1.88807e+07	-5.48705e+07	-1.59e+07	-2.82973e+07	-2.89334e+07
2062	-5.24409e+06	-5.02107e+07	-7.88518e+06	-4.14744e+06	-6.74874e+07	6.98405e+06	-4.62567e+07	3.28511e+06	-328032	-3.63156e+07	0	-4.62567e+07	0	-328032	-4.65848e+07	-6.47542e+06	-4.62567e+07	3.50348e+06	-328032	-4.95567e+07	2.77119e+07	-1.42384e+07	1.34735e+07	5.42299e+07	-2.83061e+07	2.59238e+07	4.86999e+07	-2.54224e+07	2.32775e+07	5.51501e+07	-2.87827e+07	2.63675e+07				-5.40139e+07	-1.03918e+07	-2.33073e+07	-2.31892e+07			1.03594e+07	1.93356e+07	1.71279e+07	1.96521e+07	-5.7128e+07	-1.698e+07	-2.94568e+07	-2.99046e+07
2063	-3.95629e+06	-5.16061e+07	-9.06342e+06	-4.74546e+06	-6.93712e+07	7.16738e+06	-4.82617e+07	3.43122e+06	-344425	-3.80075e+07	0	-4.82617e+07	0	-344425	-4.86061e+07	-6.70014e+06	-4.82617e+07	3.68414e+06	-344425	-5.16221e+07	2.67308e+07	-1.36845e+07	1.30463e+07	5.70967e+07	-2.97634e+07	2.73333e+07	5.11951e+07	-2.6682e+07	2.45132e+07	5.8017e+07	-3.02382e+07	2.77787e+07				-5.63249e+07	-1.06742e+07	-2.40929e+07	-2.38434e+07			1.00899e+07	2.03063e+07	1.79748e+07	2.06239e+07	-5.92814e+07	-1.77012e+07	-3.06313e+07	-3.09982e+07
2064	-2.59982e+06	-5.30496e+07	-1.0236e+07	-5.34073e+06	-7.12262e+07	7.43043e+06	-5.0343e+07	3.27758e+06	-360884	-3.99959e+07	0	-5.0343e+07	0	-360884	-5.07039e+07	-6.94035e+06	-5.0343e+07	3.56514e+06	-360884	-5.40791e+07	2.58142e+07	-1.31723e+07	1.26419e+07	5.98635e+07	-3.1163e+07	2.87005e+07	5.37549e+07	-2.7973e+07	2.57819e+07	6.09359e+07	-3.17193e+07	2.92166e+07				-5.85843e+07	-1.12954e+07	-2.4922e+07	-2.48625e+07			9.83923e+06	2.12495e+07	1.88452e+07	2.1616e+07	-6.1387e+07	-1.87464e+07	-3.18587e+07	-3.24631e+07
2065	-1.18491e+06	-5.45145e+07	-1.14038e+07	-5.93364e+06	-7.30369e+07	7.71767e+06	-5.2469e+07	3.45784e+06	-377410	-4.16709e+07	0	-5.2469e+07	0	-377410	-5.28464e+07	-6.91671e+06	-5.2469e+07	3.75318e+06	-377410	-5.60099e+07	2.49622e+07	-1.27004e+07	1.22618e+07	6.21489e+07	-3.22947e+07	2.98543e+07	5.63792e+07	-2.92956e+07	2.70836e+07	6.33734e+07	-3.29322e+07	3.04413e+07				-6.07751e+07	-1.18166e+07	-2.57628e+07	-2.55686e+07			9.60755e+06	2.20458e+07	1.97393e+07	2.24614e+07	-6.34294e+07	-1.96251e+07	-3.31071e+07	-3.35485e+07
2066	279252	-5.60047e+07	-1.25674e+07	-6.5245e+06	-7.48173e+07	7.9639e+06	-5.46389e+07	3.61671e+06	-394004	-4.34523e+07	0	-5.46389e+07	0	-394004	-5.50329e+07	-7.14892e+06	-5.46389e+07	3.92681e+06	-394004	-5.8255e+07	2.41747e+07	-1.22676e+07	1.19071e+07	6.51656e+07	-3.38215e+07	3.13442e+07	5.9068e+07	-3.06497e+07	2.84184e+07	6.64213e+07	-3.44734e+07	3.19479e+07				-6.29102e+07	-1.21081e+07	-2.66145e+07	-2.63071e+07			9.39491e+06	2.3074e+07	2.06571e+07	2.35011e+07	-6.54224e+07	-2.03782e+07	-3.43757e+07	-3.47539e+07
2067	1.78435e+06	-5.75235e+07	-1.37271e+07	-7.11353e+06	-7.65798e+07	8.2075e+06	-5.6243e+07	3.47061e+06	-1.0489e+06	-4.56138e+07	0	-5.68522e+07	0	-410668	-5.72628e+07	-7.39373e+06	-5.68522e+07	3.79553e+06	-410668	-6.0861e+07	2.34518e+07	-1.18729e+07	1.15789e+07	6.82055e+07	-3.53588e+07	3.28468e+07	6.18214e+07	-3.20352e+07	2.97862e+07	6.95235e+07	-3.60417e+07	3.34819e+07				-6.5001e+07	-1.2767e+07	-2.74767e+07	-2.73792e+07			9.20141e+06	2.41137e+07	2.15988e+07	2.45619e+07	-6.73784e+07	-2.15001e+07	-3.5664e+07	-3.62992e+07
2068	3.31675e+06	-5.90738e+07	-1.48836e+07	-7.70094e+06	-7.83415e+07	8.3267e+06	-5.78065e+07	3.33128e+06	-1.70146e+06	-4.78499e+07	0	-5.91049e+07	0	-427404	-5.95323e+07	-7.36858e+06	-5.91049e+07	3.6572e+06	-427404	-6.32437e+07	2.27934e+07	-1.15157e+07	1.12777e+07	6.95824e+07	-3.59843e+07	3.35981e+07	6.46393e+07	-3.34523e+07	3.1187e+07	7.2134e+07	-3.73365e+07	3.47975e+07				-6.70638e+07	-1.42518e+07	-2.83453e+07	-2.84462e+07			9.02712e+06	2.46369e+07	2.25644e+07	2.5473e+07	-6.93144e+07	-2.3213e+07	-3.69679e+07	-3.77707e+07
2069	4.86958e+06	-6.06582e+07	-1.60369e+07	-8.28687e+06	-8.01124e+07	8.42743e+06	-5.93378e+07	3.49771e+06	-2.34646e+06	-4.97591e+07	0	-6.13967e+07	0	-444212	-6.18409e+07	-7.30473e+06	-6.13967e+07	3.82466e+06	-444212	-6.53209e+07	2.21995e+07	-1.11953e+07	1.10043e+07	7.1055e+07	-3.66604e+07	3.43946e+07	6.75218e+07	-3.49008e+07	3.2621e+07	7.47778e+07	-3.86456e+07	3.61322e+07				-6.91082e+07	-1.53645e+07	-2.92199e+07	-2.91887e+07			8.87214e+06	2.5192e+07	2.3554e+07	2.63981e+07	-7.12403e+07	-2.45671e+07	-3.82868e+07	-3.89229e+07
2070	6.43665e+06	-6.22815e+07	-1.71874e+07	-8.87146e+06	-8.19038e+07	8.67402e+06	-6.08467e+07	3.35637e+06	-2.98531e+06	-5.18016e+07	0	-6.37291e+07	0	-461096	-6.41902e+07	-7.50351e+06	-6.37291e+07	3.69134e+06	-461096	-6.80024e+07	2.16702e+07	-1.09112e+07	1.0759e+07	7.31485e+07	-3.76813e+07	3.54672e+07	7.04687e+07	-3.63807e+07	3.40881e+07	7.80425e+07	-4.02918e+07	3.77507e+07				-7.11447e+07	-1.63345e+07	-3.01021e+07	-3.02517e+07			8.73655e+06	2.59434e+07	2.45678e+07	2.75211e+07	-7.31672e+07	-2.58582e+07	-3.96224e+07	-4.04813e+07
2071	8.01238e+06	-6.3942e+07	-1.83353e+07	-9.45481e+06	-8.37198e+07	8.92631e+06	-6.23357e+07	3.21425e+06	-3.61914e+06	-5.38143e+07	0	-6.6098e+07	0	-478055	-6.6576e+07	-7.44486e+06	-6.6098e+07	3.55034e+06	-478055	-7.04706e+07	2.12054e+07	-1.0663e+07	1.05424e+07	7.47398e+07	-3.84318e+07	3.6308e+07	7.34803e+07	-3.7892e+07	3.55882e+07	8.08362e+07	-4.16789e+07	3.91573e+07				-7.31774e+07	-1.75063e+07	-3.09878e+07	-3.13132e+07			8.62045e+06	2.65405e+07	2.56057e+07	2.85011e+07	-7.50993e+07	-2.72738e+07	-4.09704e+07	-4.19695e+07
2072	9.59172e+06	-6.50474e+07	-1.80022e+07	-1.0037e+07	-8.34949e+07	9.18323e+06	-6.32164e+07	3.38151e+06	-4.2488e+06	-5.49005e+07	0	-6.7225e+07	0	-1.22172e+06	-6.84467e+07	-7.35019e+06	-6.79088e+07	3.74569e+06	-495091	-7.20084e+07	2.08052e+07	-1.04505e+07	1.03546e+07	7.63957e+07	-3.92179e+07	3.71777e+07	7.65563e+07	-3.94348e+07	3.71216e+07	8.36633e+07	-4.30796e+07	4.05837e+07				-7.31402e+07	-1.77227e+07	-3.13252e+07	-3.14247e+07			8.52391e+06	2.71599e+07	2.66679e+07	2.94953e+07	-7.4971e+07	-2.77405e+07	-4.17789e+07	-4.25131e+07
2073	9.78128e+06	-6.62408e+07	-1.76656e+07	-1.06141e+07	-8.47391e+07	9.17256e+06	-6.40841e+07	3.23363e+06	-4.87314e+06	-5.6551e+07	0	-6.82984e+07	0	-1.96201e+06	-7.02604e+07	-7.53878e+06	-6.97477e+07	3.63278e+06	-512012	-7.41657e+07	2.31363e+07	-1.1722e+07	1.14143e+07	7.85618e+07	-4.0269e+07	3.82928e+07	7.8317e+07	-4.02414e+07	3.80756e+07	8.71216e+07	-4.48053e+07	4.23162e+07				-7.33248e+07	-1.82583e+07	-3.21848e+07	-3.18495e+07			9.27704e+06	2.79257e+07	2.7307e+07	3.06736e+07	-7.54621e+07	-2.86253e+07	-4.29534e+07	-4.34921e+07
2074	9.69716e+06	-6.75162e+07	-1.73446e+07	-1.11899e+07	-8.63535e+07	9.20646e+06	-6.49446e+07	3.1044e+06	-5.49427e+06	-5.8128e+07	0	-6.93288e+07	0	-2.6934e+06	-7.20222e+07	-7.47155e+06	-7.16155e+07	3.51861e+06	-529007	-7.60975e+07	2.5532e+07	-1.30227e+07	1.25094e+07	8.02154e+07	-4.10411e+07	3.91744e+07	8.01421e+07	-4.10818e+07	3.90603e+07	9.00986e+07	-4.62652e+07	4.38333e+07				-7.38441e+07	-1.89536e+07	-3.29619e+07	-3.22641e+07			1.0053e+07	2.85337e+07	2.79683e+07	3.17053e+07	-7.63004e+07	-2.95943e+07	-4.40538e+07	-4.43922e+07
2075	9.3764e+06	-6.87939e+07	-1.72267e+07	-1.15203e+07	-8.81645e+07	9.23573e+06	-6.57996e+07	3.19956e+06	-5.81785e+06	-5.91822e+07	0	-7.0322e+07	0	-3.08195e+06	-7.3404e+07	-7.38754e+06	-7.35096e+07	3.62195e+06	-546077	-7.78212e+07	2.79923e+07	-1.37212e+07	1.42711e+07	8.20234e+07	-4.14408e+07	4.05826e+07	8.20318e+07	-4.14868e+07	4.05451e+07	9.31401e+07	-4.69895e+07	4.61506e+07				-7.38935e+07	-1.85996e+07	-3.28589e+07	-3.16706e+07			1.02329e+07	2.87368e+07	2.81764e+07	3.19953e+07	-7.79316e+07	-3.04453e+07	-4.52276e+07	-4.5826e+07
2076	8.98121e+06	-7.01323e+07	-1.69913e+07	-1.21258e+07	-9.02682e+07	9.20049e+06	-6.6649e+07	3.06667e+06	-6.43369e+06	-6.08155e+07	0	-7.12811e+07	0	-3.80008e+06	-7.50812e+07	-7.56528e+06	-7.54253e+07	3.50423e+06	-563224	-8.00495e+07	3.00899e+07	-1.48263e+07	1.52636e+07	8.44729e+07	-4.26459e+07	4.1827e+07	8.39861e+07	-4.24056e+07	4.15805e+07	9.6792e+07	-4.88091e+07	4.79829e+07				-7.50047e+07	-1.89885e+07	-3.35007e+07	-3.20666e+07			1.09212e+07	2.95977e+07	2.88824e+07	3.32451e+07	-7.9347e+07	-3.12178e+07	-4.61988e+07	-4.68045e+07
2077	8.39982e+06	-7.14499e+07	-1.67416e+07	-1.26312e+07	-9.24229e+07	9.1433e+06	-6.74942e+07	2.93565e+06	-6.96814e+06	-6.23834e+07	0	-7.22102e+07	0	-4.42431e+06	-7.66345e+07	-7.48324e+06	-7.66157e+07	3.37749e+06	-1.28328e+06	-8.20048e+07	3.2252e+07	-1.58253e+07	1.64268e+07	8.63996e+07	-4.34492e+07	4.29504e+07	8.60048e+07	-4.32403e+07	4.27645e+07	9.99523e+07	-5.01675e+07	4.97849e+07				-7.59962e+07	-1.9433e+07	-3.387e+07	-3.22199e+07			1.15026e+07	3.01824e+07	2.94898e+07	3.41559e+07	-8.09203e+07	-3.2201e+07	-4.71447e+07	-4.78489e+07
2078	7.79632e+06	-7.27433e+07	-1.65212e+07	-1.32347e+07	-9.47029e+07	9.16379e+06	-6.83366e+07	3.11478e+06	-7.57973e+06	-6.36378e+07	0	-7.31129e+07	0	-5.13316e+06	-7.8246e+07	-7.36958e+06	-7.77371e+07	3.55803e+06	-2.09709e+06	-8.36458e+07	3.44787e+07	-1.69809e+07	1.74978e+07	8.83868e+07	-4.43975e+07	4.39893e+07	8.80881e+07	-4.42321e+07	4.38561e+07	1.01674e+08	-5.09258e+07	5.07478e+07				-7.72051e+07	-1.96485e+07	-3.439e+07	-3.2898e+07			1.22363e+07	3.09038e+07	3.02408e+07	3.48097e+07	-8.24666e+07	-3.2734e+07	-4.80053e+07	-4.8836e+07
2079	7.18409e+06	-7.40104e+07	-1.63064e+07	-1.38373e+07	-9.697e+07	9.17257e+06	-6.91786e+07	2.97056e+06	-8.18946e+06	-6.5225e+07	0	-7.39936e+07	0	-5.83836e+06	-7.98319e+07	-7.52513e+06	-7.87992e+07	3.41527e+06	-2.90109e+06	-8.58102e+07	3.67699e+07	-1.81643e+07	1.86056e+07	9.10328e+07	-4.57042e+07	4.53286e+07	9.0236e+07	-4.5259e+07	4.4977e+07	1.04023e+08	-5.20269e+07	5.19957e+07				-7.83645e+07	-1.98964e+07	-3.48549e+07	-3.38145e+07			1.29927e+07	3.18335e+07	3.10143e+07	3.56619e+07	-8.39773e+07	-3.33915e+07	-4.88176e+07	-5.01483e+07
2080	6.57502e+06	-7.52475e+07	-1.60963e+07	-1.4439e+07	-9.92077e+07	9.33285e+06	-7.00203e+07	2.82518e+06	-8.79747e+06	-6.66597e+07	0	-7.48541e+07	0	-6.54035e+06	-8.13944e+07	-7.40129e+06	-7.9808e+07	3.27833e+06	-3.6971e+06	-8.76281e+07	3.91256e+07	-1.93764e+07	1.97492e+07	9.3149e+07	-4.67201e+07	4.64289e+07	9.24484e+07	-4.63204e+07	4.6128e+07	1.05842e+08	-5.28453e+07	5.29965e+07				-7.94585e+07	-2.02309e+07	-3.52664e+07	-3.46316e+07			1.3772e+07	3.26005e+07	3.18106e+07	3.63511e+07	-8.54357e+07	-3.40592e+07	-4.95839e+07	-5.1277e+07
2081	5.9797e+06	-7.64481e+07	-1.58903e+07	-1.50398e+07	-1.01398e+08	9.50358e+06	-7.08587e+07	3.0055e+06	-9.40385e+06	-6.77535e+07	0	-7.56929e+07	0	-7.23952e+06	-8.29324e+07	-7.27677e+06	-8.07656e+07	3.4602e+06	-4.4865e+06	-8.90687e+07	4.15459e+07	-2.06176e+07	2.09283e+07	9.53298e+07	-4.77673e+07	4.75625e+07	9.47253e+07	-4.74159e+07	4.73095e+07	1.07757e+08	-5.37185e+07	5.40382e+07				-8.04701e+07	-2.0191e+07	-3.5623e+07	-3.50305e+07			1.45742e+07	3.33902e+07	3.26295e+07	3.70723e+07	-8.68243e+07	-3.43633e+07	-5.03029e+07	-5.19964e+07
2082	5.40762e+06	-7.76497e+07	-1.56878e+07	-1.56397e+07	-1.0357e+08	9.68305e+06	-7.16941e+07	2.86235e+06	-1.00087e+07	-6.91574e+07	0	-7.65118e+07	0	-7.93614e+06	-8.44479e+07	-7.42277e+06	-8.16765e+07	3.31866e+06	-5.27037e+06	-9.1051e+07	4.40308e+07	-2.18884e+07	2.21424e+07	9.81694e+07	-4.91725e+07	4.8997e+07	9.70668e+07	-4.8545e+07	4.85218e+07	1.10299e+08	-5.49379e+07	5.53614e+07				-8.14272e+07	-2.01604e+07	-3.59261e+07	-3.56896e+07			1.53993e+07	3.43885e+07	3.34713e+07	3.7992e+07	-8.81703e+07	-3.47689e+07	-5.09766e+07	-5.3059e+07
2083	4.79006e+06	-7.88505e+07	-1.54884e+07	-1.62389e+07	-1.05788e+08	9.62023e+06	-7.25263e+07	2.69102e+06	-1.06121e+07	-7.08272e+07	0	-7.73118e+07	0	-8.63046e+06	-8.59422e+07	-7.28967e+06	-8.25442e+07	3.18284e+06	-6.04955e+06	-9.27006e+07	4.65801e+07	-2.31889e+07	2.33912e+07	1.00479e+08	-5.02864e+07	5.01929e+07	9.94728e+07	-4.97075e+07	4.97653e+07	1.12312e+08	-5.58702e+07	5.64419e+07				-8.23965e+07	-2.06343e+07	-3.61769e+07	-3.62587e+07			1.62475e+07	3.52244e+07	3.4336e+07	3.8749e+07	-8.95402e+07	-3.56028e+07	-5.16063e+07	-5.39516e+07
2084	4.13268e+06	-8.00513e+07	-1.5292e+07	-1.68373e+07	-1.08048e+08	9.60623e+06	-7.33579e+07	2.84531e+06	-1.12142e+07	-7.21205e+07	0	-7.80966e+07	0	-9.32265e+06	-8.74192e+07	-7.15908e+06	-8.33745e+07	3.37273e+06	-6.8247e+06	-9.39855e+07	4.9194e+07	-2.45194e+07	2.46746e+07	1.02733e+08	-5.13653e+07	5.13674e+07	1.01943e+08	-5.09031e+07	5.10403e+07	1.14421e+08	-5.68538e+07	5.75668e+07				-8.33733e+07	-2.07532e+07	-3.63789e+07	-3.64187e+07			1.71189e+07	3.60453e+07	3.52236e+07	3.95382e+07	-9.0929e+07	-3.60753e+07	-5.21956e+07	-5.44473e+07
2085	3.44058e+06	-8.12507e+07	-1.50703e+07	-1.7435e+07	-1.10315e+08	9.59135e+06	-7.41888e+07	2.68617e+06	-1.18149e+07	-7.37261e+07	0	-7.88671e+07	0	-1.00129e+07	-8.888e+07	-7.31679e+06	-8.41701e+07	3.22136e+06	-7.59633e+06	-9.58618e+07	5.18724e+07	-2.59589e+07	2.59135e+07	1.05645e+08	-5.28754e+07	5.27696e+07	1.04478e+08	-5.2192e+07	5.22865e+07	1.17188e+08	-5.82631e+07	5.89249e+07				-8.44018e+07	-2.09565e+07	-3.65935e+07	-3.69369e+07			1.78236e+07	3.68241e+07	3.59047e+07	4.02826e+07	-9.24918e+07	-3.6902e+07	-5.29753e+07	-5.55792e+07
2086	2.71838e+06	-8.24444e+07	-1.4851e+07	-1.8032e+07	-1.12609e+08	9.51532e+06	-7.50159e+07	2.52579e+06	-1.24144e+07	-7.53892e+07	0	-7.96216e+07	0	-1.07012e+07	-9.03228e+07	-7.18201e+06	-8.49307e+07	3.07579e+06	-8.36484e+06	-9.74018e+07	5.46154e+07	-2.74302e+07	2.71852e+07	1.08117e+08	-5.41278e+07	5.39894e+07	1.07078e+08	-5.35152e+07	5.35629e+07	1.19394e+08	-5.93461e+07	6.00484e+07				-8.54238e+07	-2.13997e+07	-3.67599e+07	-3.73534e+07			1.85456e+07	3.749e+07	3.66032e+07	4.08828e+07	-9.40634e+07	-3.78992e+07	-5.37196e+07	-5.6519e+07
2087	1.97021e+06	-8.36294e+07	-1.46339e+07	-1.86545e+07	-1.14948e+08	9.4204e+06	-7.58392e+07	2.71144e+06	-1.30453e+07	-7.67527e+07	0	-8.03606e+07	0	-1.1427e+07	-9.17876e+07	-7.0502e+06	-8.56586e+07	3.27628e+06	-9.17566e+06	-9.86081e+07	5.74229e+07	-2.89334e+07	2.84896e+07	1.10654e+08	-5.5413e+07	5.52411e+07	1.09742e+08	-5.48725e+07	5.48697e+07	1.21697e+08	-6.04813e+07	6.12152e+07				-8.6458e+07	-2.15116e+07	-3.69179e+07	-3.73929e+07			1.9285e+07	3.81732e+07	3.7319e+07	4.15082e+07	-9.56626e+07	-3.85795e+07	-5.44686e+07	-5.70999e+07
2088	1.20336e+06	-8.48043e+07	-1.44189e+07	-1.92759e+07	-1.17296e+08	9.40595e+06	-7.66161e+07	2.87704e+06	-1.36923e+07	-7.80254e+07	0	-8.10845e+07	0	-1.21507e+07	-9.32352e+07	-7.20804e+06	-8.63552e+07	3.4699e+06	-9.98352e+06	-1.00077e+08	6.0295e+07	-3.04684e+07	2.98266e+07	1.1385e+08	-5.70776e+07	5.67722e+07	1.12471e+08	-5.62639e+07	5.6207e+07	1.24658e+08	-6.19978e+07	6.26598e+07				-8.74691e+07	-2.12532e+07	-3.70283e+07	-3.74171e+07			2.00418e+07	3.90272e+07	3.80522e+07	4.23045e+07	-9.72539e+07	-3.89982e+07	-5.5183e+07	-5.77724e+07
2089	524992	-8.59177e+07	-1.4206e+07	-1.98964e+07	-1.19495e+08	9.46021e+06	-7.73849e+07	2.69578e+06	-1.43378e+07	-7.95667e+07	0	-8.17966e+07	0	-1.28725e+07	-9.46692e+07	-7.37269e+06	-8.70252e+07	3.31669e+06	-1.07886e+07	-1.0187e+08	6.32316e+07	-3.20352e+07	3.11963e+07	1.16942e+08	-5.86785e+07	5.82639e+07	1.15264e+08	-5.76892e+07	5.75749e+07	1.27652e+08	-6.3531e+07	6.41209e+07				-8.82987e+07	-2.13028e+07	-3.70943e+07	-3.77489e+07			2.08161e+07	3.98555e+07	3.88028e+07	4.31101e+07	-9.8679e+07	-3.97112e+07	-5.58664e+07	-5.87597e+07
2090	-79106	-8.70351e+07	-1.39316e+07	-2.04902e+07	-1.21536e+08	9.69123e+06	-7.8146e+07	2.87802e+06	-1.49818e+07	-8.05586e+07	0	-8.24976e+07	0	-1.35924e+07	-9.609e+07	-7.25735e+06	-8.76703e+07	3.51388e+06	-1.15911e+07	-1.03005e+08	6.62327e+07	-3.3634e+07	3.25987e+07	1.19505e+08	-5.99662e+07	5.95389e+07	1.18122e+08	-5.91484e+07	5.89735e+07	1.30117e+08	-6.4752e+07	6.53645e+07				-8.89373e+07	-2.10197e+07	-3.71165e+07	-3.76404e+07			2.16077e+07	4.05476e+07	3.95707e+07	4.37797e+07	-9.99283e+07	-4.00109e+07	-5.65192e+07	-5.92252e+07
2091	-751352	-8.81018e+07	-1.36592e+07	-2.10832e+07	-1.23595e+08	9.89514e+06	-7.8896e+07	3.06105e+06	-1.56245e+07	-8.15642e+07	0	-8.3184e+07	0	-1.43105e+07	-9.74945e+07	-7.44199e+06	-8.82881e+07	3.70491e+06	-1.23912e+07	-1.04416e+08	6.96962e+07	-3.54949e+07	3.42013e+07	1.22816e+08	-6.16837e+07	6.11328e+07	1.21044e+08	-6.06413e+07	6.04029e+07	1.33271e+08	-6.63691e+07	6.69021e+07				-8.93942e+07	-2.04315e+07	-3.70915e+07	-3.75143e+07			2.25196e+07	4.14339e+07	4.03561e+07	4.46281e+07	-1.01076e+08	-4.01304e+07	-5.71384e+07	-5.97882e+07
2092	-1.36332e+06	-8.85254e+07	-1.46669e+07	-2.23243e+07	-1.2688e+08	1.01094e+07	-7.96349e+07	2.89773e+06	-1.62658e+07	-8.28936e+07	0	-8.38562e+07	0	-1.50268e+07	-9.8883e+07	-7.63044e+06	-8.888e+07	3.54965e+06	-1.3189e+07	-1.0615e+08	7.32241e+07	-3.73866e+07	3.58375e+07	1.26192e+08	-6.34359e+07	6.27564e+07	1.24031e+08	-6.21678e+07	6.18632e+07	1.36459e+08	-6.80032e+07	6.84559e+07				-9.10424e+07	-2.01372e+07	-3.70198e+07	-3.76938e+07			2.3449e+07	4.23377e+07	4.11589e+07	4.5486e+07	-1.03431e+08	-4.05559e+07	-5.77241e+07	-6.06637e+07
2093	-911179	-8.88904e+07	-1.56707e+07	-2.35618e+07	-1.29034e+08	1.00828e+07	-8.04004e+07	2.74109e+06	-1.68901e+07	-8.44667e+07	0	-8.45103e+07	0	-1.57433e+07	-1.00254e+08	-7.53541e+06	-8.94848e+07	3.40113e+06	-1.39689e+07	-1.07588e+08	7.34878e+07	-3.73803e+07	3.61075e+07	1.29038e+08	-6.48753e+07	6.41632e+07	1.27082e+08	-6.3728e+07	6.33544e+07	1.39117e+08	-6.93252e+07	6.97922e+07				-9.29266e+07	-2.03035e+07	-3.68992e+07	-3.77957e+07			2.35359e+07	4.31054e+07	4.19791e+07	4.62078e+07	-1.05498e+08	-4.13613e+07	-5.82745e+07	-6.13801e+07
2094	-387757	-8.92123e+07	-1.6661e+07	-2.47907e+07	-1.31052e+08	1.00117e+07	-8.11642e+07	2.93113e+06	-1.75133e+07	-8.57347e+07	0	-8.5154e+07	0	-1.64582e+07	-1.01612e+08	-7.4392e+06	-9.00755e+07	3.59236e+06	-1.47466e+07	-1.08669e+08	7.3816e+07	-3.74119e+07	3.64041e+07	1.3205e+08	-6.64059e+07	6.56439e+07	1.3019e+08	-6.53168e+07	6.48732e+07	1.41941e+08	-7.07393e+07	7.12015e+07				-9.46476e+07	-2.00907e+07	-3.6739e+07	-3.74675e+07			2.36396e+07	4.39166e+07	4.28146e+07	4.6973e+07	-1.07412e+08	-4.18181e+07	-5.87976e+07	-6.1696e+07
2095	188367	-8.87564e+07	-1.76404e+07	-2.60123e+07	-1.32221e+08	9.9155e+06	-8.11808e+07	2.77773e+06	-1.81351e+07	-8.66227e+07	0	-8.50432e+07	0	-1.71715e+07	-1.02215e+08	-7.61138e+06	-8.99079e+07	3.44022e+06	-1.55224e+07	-1.09601e+08	7.42087e+07	-3.74967e+07	3.6712e+07	1.3572e+08	-6.83163e+07	6.74038e+07	1.33362e+08	-6.69391e+07	6.6423e+07	1.45392e+08	-7.2516e+07	7.2876e+07				-9.55088e+07	-1.92188e+07	-3.57917e+07	-3.67255e+07			2.376e+07	4.48987e+07	4.36676e+07	4.79011e+07	-1.08461e+08	-4.17239e+07	-5.85471e+07	-6.17003e+07
2096	800959	-8.81907e+07	-1.8611e+07	-2.72278e+07	-1.33229e+08	9.79678e+06	-8.11104e+07	2.62349e+06	-1.87558e+07	-8.74459e+07	0	-8.4837e+07	0	-1.78831e+07	-1.0272e+08	-7.50259e+06	-8.96414e+07	3.29427e+06	-1.62961e+07	-1.10146e+08	7.4666e+07	-3.76308e+07	3.70352e+07	1.38861e+08	-6.99158e+07	6.89448e+07	1.36599e+08	-6.85949e+07	6.80038e+07	1.48313e+08	-7.39826e+07	7.43308e+07				-9.61933e+07	-1.85012e+07	-3.47163e+07	-3.58151e+07			2.38971e+07	4.5745e+07	4.45381e+07	4.86932e+07	-1.09331e+08	-4.1701e+07	-5.81821e+07	-6.14526e+07
2097	1.43567e+06	-8.75334e+07	-1.95743e+07	-2.8438e+07	-1.3411e+08	9.65863e+06	-8.09592e+07	2.81552e+06	-1.93753e+07	-8.78603e+07	0	-8.45464e+07	0	-1.85932e+07	-1.0314e+08	-7.39462e+06	-8.92872e+07	3.48766e+06	-1.70679e+07	-1.10262e+08	7.51878e+07	-3.78113e+07	3.73766e+07	1.42066e+08	-7.15471e+07	7.05185e+07	1.399e+08	-7.02842e+07	6.96157e+07	1.5133e+08	-7.54999e+07	7.58305e+07				-9.67335e+07	-1.73418e+07	-3.35239e+07	-3.44315e+07			2.40511e+07	4.66087e+07	4.54261e+07	4.95108e+07	-1.10059e+08	-4.12516e+07	-5.77136e+07	-6.07512e+07
2098	2.15695e+06	-8.75048e+07	-2.05315e+07	-2.96437e+07	-1.35523e+08	9.60058e+06	-8.14798e+07	2.98079e+06	-1.99937e+07	-8.88921e+07	0	-8.49251e+07	0	-1.93019e+07	-1.04227e+08	-7.55757e+06	-8.95574e+07	3.68146e+06	-1.78553e+07	-1.11289e+08	7.57742e+07	-3.80358e+07	3.77384e+07	1.45929e+08	-7.35573e+07	7.23722e+07	1.43266e+08	-7.20068e+07	7.12588e+07	1.54975e+08	-7.73789e+07	7.75962e+07				-9.77847e+07	-1.65199e+07	-3.29681e+07	-3.36926e+07			2.42219e+07	4.76435e+07	4.63316e+07	5.04914e+07	-1.11301e+08	-4.12486e+07	-5.78954e+07	-6.07975e+07
2099	2.95534e+06	-8.74591e+07	-2.14837e+07	-3.08452e+07	-1.36833e+08	9.62684e+06	-8.20207e+07	2.7994e+06	-2.0611e+07	-9.02054e+07	0	-8.53224e+07	0	-2.0009e+07	-1.05331e+08	-7.73976e+06	-8.98376e+07	3.53563e+06	-1.86409e+07	-1.12683e+08	7.6425e+07	-3.83026e+07	3.81225e+07	1.49737e+08	-7.55305e+07	7.42064e+07	1.46696e+08	-7.37628e+07	7.29331e+07	1.58607e+08	-7.92465e+07	7.93601e+07				-9.87103e+07	-1.5999e+07	-3.23983e+07	-3.33225e+07			2.44095e+07	4.86647e+07	4.72546e+07	5.14694e+07	-1.12423e+08	-4.15407e+07	-5.80768e+07	-6.12132e+07
2100	3.8223e+06	-8.73973e+07	-2.24317e+07	-3.20431e+07	-1.3805e+08	9.83283e+06	-8.25777e+07	2.98159e+06	-2.12272e+07	-9.09905e+07	0	-8.57348e+07	0	-2.07147e+07	-1.0645e+08	-7.6573e+06	-9.01254e+07	3.72628e+06	-1.94247e+07	-1.13481e+08	7.71405e+07	-3.86103e+07	3.85302e+07	1.53015e+08	-7.71901e+07	7.58245e+07	1.50191e+08	-7.5552e+07	7.46386e+07	1.61739e+08	-8.08191e+07	8.09202e+07				-9.95195e+07	-1.5166e+07	-3.18109e+07	-3.2561e+07			2.46139e+07	4.955e+07	4.81952e+07	5.23195e+07	-1.13436e+08	-4.14405e+07	-5.82543e+07	-6.11616e+07
2101	4.75013e+06	-8.73208e+07	-2.33758e+07	-3.32376e+07	-1.39184e+08	1.00145e+07	-8.31478e+07	3.16469e+06	-2.18423e+07	-9.18109e+07	0	-8.6162e+07	0	-2.14191e+07	-1.07581e+08	-7.84237e+06	-9.04195e+07	3.91791e+06	-2.02067e+07	-1.14551e+08	7.79204e+07	-3.89577e+07	3.89627e+07	1.57041e+08	-7.92787e+07	7.77622e+07	1.5375e+08	-7.73745e+07	7.63754e+07	1.655e+08	-8.27511e+07	8.27487e+07				-1.00221e+08	-1.40487e+07	-3.12057e+07	-3.1802e+07			2.48352e+07	5.06295e+07	4.91534e+07	5.33326e+07	-1.14349e+08	-4.11813e+07	-5.84277e+07	-6.12181e+07
2102	5.73189e+06	-8.72312e+07	-2.43167e+07	-3.44291e+07	-1.40245e+08	1.02101e+07	-8.37242e+07	3.00157e+06	-2.24565e+07	-9.2969e+07	0	-8.65958e+07	0	-2.21221e+07	-1.08718e+08	-8.04384e+06	-9.07166e+07	3.77036e+06	-2.0987e+07	-1.15977e+08	7.87649e+07	-3.93442e+07	3.94208e+07	1.61132e+08	-8.14014e+07	7.97304e+07	1.57374e+08	-7.92302e+07	7.81436e+07	1.69325e+08	-8.47178e+07	8.4607e+07				-1.00824e+08	-1.32386e+07	-3.05744e+07	-3.13701e+07			2.50734e+07	5.17268e+07	5.01292e+07	5.43633e+07	-1.15172e+08	-4.12422e+07	-5.85888e+07	-6.16138e+07
2103	6.75771e+06	-8.71301e+07	-2.52547e+07	-3.56178e+07	-1.41245e+08	1.01667e+07	-8.43072e+07	2.84509e+06	-2.30697e+07	-9.43652e+07	0	-8.70366e+07	0	-2.28238e+07	-1.0986e+08	-7.97819e+06	-9.1018e+07	3.61554e+06	-2.17657e+07	-1.17146e+08	7.9674e+07	-3.97688e+07	3.99052e+07	1.64693e+08	-8.32106e+07	8.14822e+07	1.61062e+08	-8.11191e+07	7.99431e+07	1.72651e+08	-8.63901e+07	8.62611e+07				-1.0134e+08	-1.28829e+07	-2.99173e+07	-3.08852e+07			2.53285e+07	5.26882e+07	5.11225e+07	5.52662e+07	-1.15916e+08	-4.16769e+07	-5.87379e+07	-6.18801e+07
2104	7.82187e+06	-8.70191e+07	-2.61901e+07	-3.68038e+07	-1.42191e+08	1.00812e+07	-8.48953e+07	3.03539e+06	-2.36819e+07	-9.54607e+07	0	-8.74829e+07	0	-2.35242e+07	-1.11007e+08	-7.87749e+06	-9.13231e+07	3.80755e+06	-2.25427e+07	-1.17936e+08	8.06475e+07	-4.02311e+07	4.04164e+07	1.6835e+08	-8.50702e+07	8.32794e+07	1.64815e+08	-8.30411e+07	8.1774e+07	1.76011e+08	-8.80777e+07	8.79332e+07				-1.01775e+08	-1.21812e+07	-2.92331e+07	-3.00025e+07			2.56004e+07	5.36753e+07	5.21335e+07	5.61786e+07	-1.16591e+08	-4.17854e+07	-5.88736e+07	-6.17572e+07
2105	8.91921e+06	-8.68996e+07	-2.71231e+07	-3.79873e+07	-1.43091e+08	9.97207e+06	-8.54873e+07	2.88232e+06	-2.42932e+07	-9.69261e+07	0	-8.79336e+07	0	-2.42233e+07	-1.12157e+08	-8.05783e+06	-9.16316e+07	3.66325e+06	-2.33181e+07	-1.19344e+08	8.16857e+07	-4.07307e+07	4.0955e+07	1.72665e+08	-8.73091e+07	8.53561e+07	1.68633e+08	-8.49962e+07	8.36364e+07	1.80029e+08	-9.01456e+07	8.98839e+07				-1.02136e+08	-1.157e+07	-2.85206e+07	-2.94604e+07			2.58894e+07	5.48335e+07	5.31621e+07	5.7262e+07	-1.17201e+08	-4.20926e+07	-5.89949e+07	-6.20823e+07
2106	1.00451e+07	-8.67733e+07	-2.80538e+07	-3.91684e+07	-1.43951e+08	9.84166e+06	-8.60825e+07	2.72835e+06	-2.49037e+07	-9.84162e+07	0	-8.83883e+07	0	-2.49213e+07	-1.1331e+08	-7.97364e+06	-9.19458e+07	3.51111e+06	-2.4092e+07	-1.205e+08	8.27883e+07	-4.12671e+07	4.15212e+07	1.76451e+08	-8.92372e+07	8.72139e+07	1.72515e+08	-8.69844e+07	8.55302e+07	1.83549e+08	-9.19218e+07	9.16277e+07				-1.02429e+08	-1.12023e+07	-2.77795e+07	-2.88727e+07			2.61952e+07	5.5856e+07	5.42084e+07	5.82177e+07	-1.17755e+08	-4.25602e+07	-5.91013e+07	-6.22827e+07
2107	1.11953e+07	-8.72231e+07	-2.77051e+07	-3.97119e+07	-1.43445e+08	9.69196e+06	-8.66775e+07	2.92071e+06	-2.55132e+07	-9.9578e+07	0	-8.88444e+07	0	-2.56181e+07	-1.14463e+08	-7.85653e+06	-9.22616e+07	3.70537e+06	-2.48644e+07	-1.21277e+08	8.39555e+07	-4.18401e+07	4.21154e+07	1.80301e+08	-9.11969e+07	8.91046e+07	1.76461e+08	-8.90056e+07	8.74556e+07	1.87103e+08	-9.37125e+07	9.33903e+07				-1.0133e+08	-1.04735e+07	-2.7007e+07	-2.78869e+07			2.6518e+07	5.68961e+07	5.52723e+07	5.91829e+07	-1.16927e+08	-4.26819e+07	-5.91902e+07	-6.20943e+07
2108	1.12137e+07	-8.78076e+07	-2.736e+07	-4.02561e+07	-1.4421e+08	9.62316e+06	-8.72732e+07	3.08635e+06	-2.6122e+07	-1.00686e+08	0	-8.93031e+07	0	-2.63138e+07	-1.15617e+08	-8.02224e+06	-9.25801e+07	3.90707e+06	-2.56354e+07	-1.22331e+08	8.84912e+07	-4.43622e+07	4.41289e+07	1.84811e+08	-9.35355e+07	9.12753e+07	1.80472e+08	-9.10598e+07	8.94124e+07	1.91315e+08	-9.58829e+07	9.54321e+07				-1.00081e+08	-9.41046e+06	-2.62044e+07	-2.68985e+07			2.77115e+07	5.81074e+07	5.6354e+07	6.03192e+07	-1.16498e+08	-4.25783e+07	-5.92629e+07	-6.20115e+07
2109	1.09849e+07	-8.85111e+07	-2.70284e+07	-4.08058e+07	-1.4536e+08	9.63945e+06	-8.78692e+07	2.90531e+06	-2.673e+07	-1.02054e+08	0	-8.97637e+07	0	-2.70084e+07	-1.16772e+08	-8.22466e+06	-9.29012e+07	3.76212e+06	-2.64049e+07	-1.23769e+08	9.30914e+07	-4.69122e+07	4.61792e+07	1.89264e+08	-9.58369e+07	9.34267e+07	1.84548e+08	-9.3147e+07	9.14009e+07	1.95623e+08	-9.81052e+07	9.75178e+07				-9.91812e+07	-8.62777e+06	-2.53712e+07	-2.62508e+07			2.89228e+07	5.93054e+07	5.74533e+07	6.14814e+07	-1.16438e+08	-4.27491e+07	-5.93188e+07	-6.22873e+07
2110	1.05412e+07	-8.92497e+07	-2.67714e+07	-4.13921e+07	-1.46872e+08	9.83654e+06	-8.84655e+07	3.08784e+06	-2.73372e+07	-1.02878e+08	0	-9.02266e+07	0	-2.77019e+07	-1.17929e+08	-8.14571e+06	-9.3225e+07	3.95365e+06	-2.7173e+07	-1.2459e+08	9.77562e+07	-4.9475e+07	4.82812e+07	1.93187e+08	-9.78245e+07	9.53621e+07	1.88688e+08	-9.52671e+07	9.34209e+07	1.99401e+08	-1.00014e+08	9.93869e+07				-9.85908e+07	-7.51624e+06	-2.45076e+07	-2.52031e+07			3.0152e+07	6.03675e+07	5.85704e+07	6.25077e+07	-1.1672e+08	-4.25108e+07	-5.93582e+07	-6.20824e+07
2111	1.00411e+07	-9.00795e+07	-2.65233e+07	-4.19817e+07	-1.48543e+08	1.00104e+07	-8.90617e+07	3.27134e+06	-2.79437e+07	-1.03724e+08	0	-9.06913e+07	0	-2.83944e+07	-1.19086e+08	-8.33218e+06	-9.35512e+07	4.1532e+06	-2.79399e+07	-1.2567e+08	1.02058e+08	-5.18071e+07	5.02511e+07	1.97858e+08	-1.00241e+08	9.76175e+07	1.92893e+08	-9.74201e+07	9.54726e+07	2.03807e+08	-1.02282e+08	1.01525e+08				-9.82923e+07	-6.10619e+06	-2.36132e+07	-2.41447e+07			3.12886e+07	6.16241e+07	5.97052e+07	6.36972e+07	-1.17255e+08	-4.20995e+07	-5.93806e+07	-6.19728e+07
2112	9.36971e+06	-9.0915e+07	-2.62826e+07	-4.2574e+07	-1.50402e+08	1.01992e+07	-8.90348e+07	3.10856e+06	-2.92438e+07	-1.04971e+08	0	-9.11546e+07	0	-2.9086e+07	-1.20241e+08	-8.55245e+06	-9.38776e+07	4.00654e+06	-2.87054e+07	-1.27129e+08	1.06425e+08	-5.41601e+07	5.22648e+07	2.02595e+08	-1.02691e+08	9.99034e+07	1.97162e+08	-9.96061e+07	9.75559e+07	2.08309e+08	-1.04601e+08	1.03707e+08				-9.81371e+07	-5.06747e+06	-2.26847e+07	-2.34217e+07			3.2443e+07	6.28986e+07	6.08577e+07	6.49126e+07	-1.17959e+08	-4.20722e+07	-5.93828e+07	-6.22163e+07
2113	8.68873e+06	-9.17498e+07	-2.60482e+07	-4.31684e+07	-1.52278e+08	1.02499e+07	-8.89256e+07	2.95243e+06	-3.05402e+07	-1.06264e+08	0	-9.16189e+07	0	-2.97765e+07	-1.21395e+08	-8.48891e+06	-9.42067e+07	3.8526e+06	-2.94696e+07	-1.28313e+08	1.10856e+08	-5.6538e+07	5.4318e+07	2.05602e+08	-1.04134e+08	1.01468e+08	2.01496e+08	-1.01825e+08	9.96708e+07	2.1228e+08	-1.06608e+08	1.05672e+08				-9.79596e+07	-4.79525e+06	-2.17246e+07	-2.26405e+07			3.36153e+07	6.37276e+07	6.2028e+07	6.59922e+07	-1.18662e+08	-4.25359e+07	-5.93674e+07	-6.23205e+07
2114	8.00955e+06	-9.25775e+07	-2.58191e+07	-4.37644e+07	-1.54151e+08	1.02852e+07	-8.87428e+07	3.14308e+06	-3.18276e+07	-1.07142e+08	0	-9.20835e+07	0	-3.04662e+07	-1.2255e+08	-8.38791e+06	-9.4538e+07	4.04551e+06	-3.02327e+07	-1.29113e+08	1.15352e+08	-5.8942e+07	5.64098e+07	2.08705e+08	-1.05629e+08	1.03076e+08	2.05894e+08	-1.04077e+08	1.01817e+08	2.16285e+08	-1.08629e+08	1.07656e+08				-9.77416e+07	-4.06651e+06	-2.07323e+07	-2.14572e+07			3.48053e+07	6.4582e+07	6.32161e+07	6.70815e+07	-1.19346e+08	-4.25601e+07	-5.93336e+07	-6.20316e+07
2115	7.34245e+06	-9.33926e+07	-2.55945e+07	-4.43618e+07	-1.56006e+08	1.0469e+07	-8.84937e+07	2.99035e+06	-3.31075e+07	-1.08142e+08	0	-9.25482e+07	0	-3.1155e+07	-1.23703e+08	-8.56868e+06	-9.48712e+07	3.9021e+06	-3.09946e+07	-1.30532e+08	1.19912e+08	-6.13731e+07	5.85389e+07	2.12466e+08	-1.07512e+08	1.04954e+08	2.10357e+08	-1.06361e+08	1.03996e+08	2.20949e+08	-1.11031e+08	1.09919e+08				-9.74676e+07	-3.18758e+06	-1.97073e+07	-2.06138e+07			3.60132e+07	6.56075e+07	6.44221e+07	6.8342e+07	-1.19993e+08	-4.25344e+07	-5.92811e+07	-6.21903e+07
2116	6.6967e+06	-9.41487e+07	-2.53739e+07	-4.49602e+07	-1.57786e+08	1.06607e+07	-8.81432e+07	2.83671e+06	-3.43811e+07	-1.09027e+08	0	-9.29708e+07	0	-3.18429e+07	-1.24814e+08	-8.48263e+06	-9.51641e+07	3.75085e+06	-3.17553e+07	-1.31651e+08	1.24537e+08	-6.38322e+07	6.07046e+07	2.15698e+08	-1.09091e+08	1.06607e+08	2.14884e+08	-1.08678e+08	1.06206e+08	2.25115e+08	-1.1314e+08	1.11975e+08				-9.70815e+07	-2.41944e+06	-1.86077e+07	-1.96766e+07			3.72389e+07	6.6497e+07	6.56458e+07	6.94749e+07	-1.20547e+08	-4.25298e+07	-5.91679e+07	-6.21763e+07
2117	6.0807e+06	-9.49171e+07	-2.5157e+07	-4.55596e+07	-1.59553e+08	1.08591e+07	-8.83417e+07	3.0294e+06	-3.49711e+07	-1.09424e+08	0	-9.33834e+07	0	-3.253e+07	-1.25913e+08	-8.36172e+06	-9.54496e+07	3.946e+06	-3.25149e+07	-1.3238e+08	1.29226e+08	-6.63197e+07	6.29064e+07	2.18995e+08	-1.10707e+08	1.08288e+08	2.19476e+08	-1.11028e+08	1.08448e+08	2.29313e+08	-1.15264e+08	1.1405e+08				-9.66467e+07	-1.1366e+06	-1.74657e+07	-1.83304e+07			3.84825e+07	6.74041e+07	6.68873e+07	7.06175e+07	-1.21071e+08	-4.20203e+07	-5.90261e+07	-6.17627e+07
2118	5.42479e+06	-9.5696e+07	-2.49433e+07	-4.61598e+07	-1.61374e+08	1.08133e+07	-8.85696e+07	3.19538e+06	-3.55593e+07	-1.1012e+08	0	-9.37899e+07	0	-3.32163e+07	-1.27006e+08	-8.52387e+06	-9.57313e+07	4.14859e+06	-3.32735e+07	-1.3338e+08	1.3398e+08	-6.88362e+07	6.51438e+07	2.24121e+08	-1.13385e+08	1.10737e+08	2.24133e+08	-1.13411e+08	1.10721e+08	2.34171e+08	-1.17767e+08	1.16404e+08				-9.62306e+07	616348	-1.6285e+07	-1.69756e+07			3.97439e+07	6.87848e+07	6.81468e+07	7.19314e+07	-1.2163e+08	-4.13354e+07	-5.88595e+07	-6.14486e+07
2119	4.73387e+06	-9.65248e+07	-2.47326e+07	-4.67608e+07	-1.63284e+08	1.08147e+07	-8.88646e+07	3.01466e+06	-3.61515e+07	-1.11187e+08	0	-9.42322e+07	0	-3.39019e+07	-1.28134e+08	-8.7222e+06	-9.60512e+07	4.00452e+06	-3.40311e+07	-1.348e+08	1.38798e+08	-7.13819e+07	6.74165e+07	2.29192e+08	-1.16027e+08	1.13165e+08	2.28854e+08	-1.15827e+08	1.13027e+08	2.39124e+08	-1.20321e+08	1.18803e+08				-9.58678e+07	1.97825e+06	-1.51074e+07	-1.59967e+07			4.10233e+07	7.01524e+07	6.9424e+07	7.32713e+07	-1.22261e+08	-4.10344e+07	-5.87101e+07	-6.15286e+07
2120	4.01242e+06	-9.73656e+07	-2.45247e+07	-4.73623e+07	-1.6524e+08	1.08137e+07	-8.91877e+07	3.19751e+06	-3.67468e+07	-1.11923e+08	0	-9.46745e+07	0	-3.45868e+07	-1.29261e+08	-8.63759e+06	-9.63738e+07	4.19694e+06	-3.47876e+07	-1.35602e+08	1.43681e+08	-7.39571e+07	6.97243e+07	2.33732e+08	-1.1835e+08	1.15382e+08	2.33639e+08	-1.18275e+08	1.15364e+08	2.43548e+08	-1.22562e+08	1.20986e+08				-9.5516e+07	3.45889e+06	-1.38975e+07	-1.46163e+07			4.23205e+07	7.13843e+07	7.07192e+07	7.44756e+07	-1.2292e+08	-4.0539e+07	-5.85421e+07	-6.11265e+07
2121	3.2645e+06	-9.82174e+07	-2.43085e+07	-4.79645e+07	-1.67226e+08	1.07502e+07	-8.95372e+07	3.28834e+06	-3.73443e+07	-1.12843e+08	0	-9.5118e+07	0	-3.5271e+07	-1.30389e+08	-8.81898e+06	-9.67001e+07	4.2898e+06	-3.55432e+07	-1.36773e+08	1.48629e+08	-7.50205e+07	7.36084e+07	2.39021e+08	-1.19327e+08	1.19694e+08	2.38489e+08	-1.19103e+08	1.19387e+08	2.48599e+08	-1.23438e+08	1.25161e+08				-9.36175e+07	6.85106e+06	-1.10022e+07	-1.16118e+07			4.23205e+07	7.13843e+07	7.07192e+07	7.44756e+07	-1.24905e+08	-4.14587e+07	-5.96698e+07	-6.22969e+07
2122	2.49378e+06	-9.90759e+07	-2.4095e+07	-4.85672e+07	-1.69244e+08	1.06665e+07	-8.99102e+07	3.19107e+06	-3.79435e+07	-1.13996e+08	0	-9.5551e+07	0	-3.5968e+07	-1.31519e+08	-9.03388e+06	-9.70264e+07	4.1945e+06	-3.6298e+07	-1.38164e+08	1.53641e+08	-7.60889e+07	7.7552e+07	2.44375e+08	-1.2031e+08	1.24065e+08	2.43404e+08	-1.19938e+08	1.23466e+08	2.53746e+08	-1.24333e+08	1.29413e+08				-9.16923e+07	1.00685e+07	-8.05285e+06	-8.75105e+06			4.23205e+07	7.13843e+07	7.07192e+07	7.44756e+07	-1.26924e+08	-4.26119e+07	-6.07998e+07	-6.36881e+07
																																			Final year
																																		Hi demand	low expansion	-9.16923e+07	1.00685e+07	-8.05285e+06	-8.75105e+06
																																		Hi demand	high expansion	-2.07439e+08	-5.16016e+07	-9.2211e+07	-9.35263e+07
																																		Low demand	low expansion	-1.74493e+08	-8.42137e+07	-1.02212e+08	-1.04219e+08
																																		Low demand	high expansion	-2.77243e+08	-1.3618e+08	-1.77207e+08	-1.79957e+08
																																				-8.28003e+07	-9.42821e+07	-9.41593e+07	-9.5468e+07
																																				-6.98035e+07	-8.45786e+07	-8.49962e+07	-8.64303e+07

## Sheet: Total_impact_lo (Aff50yrs)
Marginal impact results for low wood demand projection, all scenarios with 50-year afforestation duration																					Forest ecosystem C impact per tC harvested:		xxx
Units Mg CO2e
	Marginal domestic supply impact (HWP - existing forest + Aff_hi)																				Lo_projection Marginal import impact - demand for IRW met by increased harvest elsewhere															Lo_projection Net impact (not including Marginal import Forest C)						Marginal import impact - demand for IRW not met (Increased use of concrete)				Net impact (with increased use of concrete)
	50_35 + Aff35_hi					50_45 + Aff45_hi					50_50 + Aff50_hi					50_55 + Aff55_hi					50_35 + Aff35_hi			50_45 + Aff45_hi			50_50 + Aff50_hi			50_55 + Aff55_hi			Reference			50_35 + Aff35_hi	50_45 + Aff45_hi	50_50 + Aff50_hi	50_55 + Aff55_hi	Reference		50_35 + Aff35_hi	50_45 + Aff45_hi	50_50 + Aff50_hi	50_55 + Aff55_hi	50_35 + Aff35_hi	50_45 + Aff45_hi	50_50 + Aff50_hi	50_55 + Aff55_hi
	Ecosystem C		HWP		Total	Ecosystem C		HWP		Total	Ecosystem C		HWP		Total	Ecosystem C		HWP		Total	Ecosystem C	HWP	Total	Ecosystem C	HWP	Total	Ecosystem C	HWP	Total	Ecosystem C	HWP	Total	Ecosystem C	HWP	Total
	Existing forest C	New forest C	Existing forest HWP	New forest HWP		Existing forest	New forest	Existing forest	New forest		Existing forest	New forest	Existing forest	New forest		Existing forest	New forest	Existing forest	New forest
2023	0	-596630	0	0	-596630	267411	-592896	303742	0	-21743.2	0	-592896	0	0	-592896	0	-592896	303742	0	-289154	0	0	0	0	0	0	-6.05686e-11	0	-6.05686e-11	-4.13283e-10	2.69843e-10	-1.4344e-10	0	0	0	-596630	-21743.2	-592896	-289154	0		0	0	0	-1.76023e-10	-596630	-21743.2	-592896	-289154
2024	-6736.99	-1.20374e+06	0	0	-1.21048e+06	556483	-1.18704e+06	298641	0	-331915	0	-1.18704e+06	0	0	-1.18704e+06	-273429	-1.18704e+06	298641	0	-1.16183e+06	28893.4	-17577.2	11316.2	528183	-321319	206864	28893.4	-17577.2	11316.2	528183	-321319	206864	28893.4	-17577.2	11316.2	-1.19917e+06	-125051	-1.17572e+06	-954963	11316.2		11465.9	209601	11465.9	209601	-1.19902e+06	-122314	-1.17557e+06	-952226
2025	-23742.5	-1.82875e+06	0	0	-1.85249e+06	862466	-1.78534e+06	291102	0	-631768	0	-1.78534e+06	0	0	-1.78534e+06	-301540	-1.78534e+06	291102	0	-1.79577e+06	84707.5	-52850.3	31857.2	561149	-351492	209657	84707.5	-52850.3	31857.2	561149	-351492	209657	84707.5	-52850.3	31857.2	-1.82064e+06	-422111	-1.75348e+06	-1.58612e+06	31857.2		34641.1	232318	34641.1	232318	-1.81785e+06	-399450	-1.75069e+06	-1.56346e+06
2026	-54067	-2.47878e+06	0	0	-2.53285e+06	1.18129e+06	-2.39106e+06	595115	0	-614661	0	-2.39106e+06	0	0	-2.39106e+06	-325277	-2.39106e+06	595115	0	-2.12122e+06	167442	-105799	61642.9	626984	-396901	230083	167442	-105799	61642.9	626984	-396901	230083	167442	-105799	61642.9	-2.47121e+06	-384579	-2.32942e+06	-1.89114e+06	61642.9		69768.9	266889	69768.9	266889	-2.46308e+06	-347773	-2.32129e+06	-1.85434e+06
2027	-100329	-3.16069e+06	0	0	-3.26102e+06	1.50977e+06	-3.00778e+06	584932	0	-913074	0	-3.00778e+06	0	0	-3.00778e+06	-623235	-3.00778e+06	584932	0	-3.04608e+06	277098	-176443	100655	1.21223e+06	-771558	440669	277098	-176443	100655	1.21223e+06	-771558	440669	277098	-176443	100655	-3.16037e+06	-472404	-2.90712e+06	-2.60541e+06	100655		117093	516356	117093	516356	-3.14393e+06	-396718	-2.89069e+06	-2.52973e+06
2028	-164733	-3.88101e+06	0	0	-4.04574e+06	1.60724e+06	-3.63925e+06	569096	0	-1.46292e+06	0	-3.63925e+06	0	0	-3.63925e+06	-668048	-3.63925e+06	569096	0	-3.7382e+06	413674	-263183	150492	1.32389e+06	-844495	479394	413674	-263183	150492	1.32389e+06	-844495	479394	413674	-263183	150492	-3.89525e+06	-983524	-3.48876e+06	-3.25881e+06	150492		175211	570555	175211	570555	-3.87053e+06	-892363	-3.46404e+06	-3.16765e+06
2029	-249084	-4.64589e+06	0	0	-4.89498e+06	1.68858e+06	-4.28938e+06	869109	0	-1.7317e+06	0	-4.28938e+06	0	0	-4.28938e+06	-705614	-4.28938e+06	869109	0	-4.12589e+06	577171	-367076	210096	1.46388e+06	-932552	531326	577171	-367076	210096	1.46388e+06	-932552	531326	577171	-367076	210096	-4.68488e+06	-1.20037e+06	-4.07929e+06	-3.59456e+06	210096		245354	636679	245354	636679	-4.64962e+06	-1.09502e+06	-4.04403e+06	-3.48921e+06
2030	-354807	-5.46113e+06	0	0	-5.81593e+06	1.75575e+06	-4.96219e+06	849121	0	-2.35732e+06	0	-4.96219e+06	0	0	-4.96219e+06	-1.01981e+06	-4.96219e+06	849121	0	-5.13288e+06	767589	-487320	280269	2.12575e+06	-1.35103e+06	774713	767589	-487320	280269	2.12575e+06	-1.35103e+06	774713	767589	-487320	280269	-5.53566e+06	-1.5826e+06	-4.68192e+06	-4.35816e+06	280269		325324	911675	325324	911675	-5.49061e+06	-1.44564e+06	-4.63687e+06	-4.2212e+06
2031	-482969	-6.3321e+06	0	0	-6.81507e+06	1.81033e+06	-5.66172e+06	827254	0	-3.02413e+06	0	-5.66172e+06	0	0	-5.66172e+06	-1.07394e+06	-5.66172e+06	827254	0	-5.9084e+06	984927	-624545	360383	2.31088e+06	-1.46827e+06	842613	984927	-624545	360383	2.31088e+06	-1.46827e+06	842613	984927	-624545	360383	-6.45468e+06	-2.18152e+06	-5.30133e+06	-5.06579e+06	360383		417207	997689	417207	997689	-6.39786e+06	-2.02644e+06	-5.24451e+06	-4.91071e+06
2032	-634319	-7.2638e+06	0	0	-7.89812e+06	1.85358e+06	-6.39201e+06	1.12564e+06	0	-3.41279e+06	0	-6.39201e+06	0	0	-6.39201e+06	-1.1187e+06	-6.39201e+06	1.12564e+06	0	-6.38507e+06	1.22919e+06	-778745	450441	2.52358e+06	-1.6006e+06	922973	1.22919e+06	-778745	450441	2.52358e+06	-1.6006e+06	922973	1.22919e+06	-778745	450441	-7.44767e+06	-2.48982e+06	-5.94157e+06	-5.46209e+06	450441		521125	1.09561e+06	521125	1.09561e+06	-7.37699e+06	-2.31719e+06	-5.87089e+06	-5.28946e+06
2033	-809318	-8.26083e+06	0	0	-9.07015e+06	2.15397e+06	-7.15708e+06	1.39752e+06	0	-3.60559e+06	0	-7.15708e+06	0	0	-7.15708e+06	-1.44309e+06	-7.15708e+06	1.39752e+06	0	-7.20266e+06	1.50037e+06	-947941	552425	3.26446e+06	-2.06585e+06	1.1986e+06	1.50037e+06	-947941	552425	3.26446e+06	-2.06585e+06	1.1986e+06	1.50037e+06	-947941	552425	-8.51773e+06	-2.40699e+06	-6.60466e+06	-6.00405e+06	552425		635216	1.40424e+06	635216	1.40424e+06	-8.43494e+06	-2.20135e+06	-6.52187e+06	-5.79842e+06
2034	-1.00818e+06	-9.32744e+06	0	0	-1.03356e+07	2.46666e+06	-7.96088e+06	1.36028e+06	0	-4.13395e+06	0	-7.96088e+06	0	0	-7.96088e+06	-1.77448e+06	-7.96088e+06	1.36028e+06	0	-8.37509e+06	1.79847e+06	-1.13373e+06	664738	3.99301e+06	-2.52352e+06	1.46949e+06	1.79847e+06	-1.13373e+06	664738	3.99301e+06	-2.52352e+06	1.46949e+06	1.79847e+06	-1.13373e+06	664738	-9.67088e+06	-2.66446e+06	-7.29614e+06	-6.90559e+06	664738		761189	1.71067e+06	761189	1.71067e+06	-9.57443e+06	-2.42328e+06	-7.19969e+06	-6.66442e+06
2035	-1.2309e+06	-1.04675e+07	0	0	-1.16984e+07	2.78765e+06	-8.80724e+06	1.64619e+06	0	-4.3734e+06	0	-8.80724e+06	0	0	-8.80724e+06	-1.84949e+06	-8.80724e+06	1.64619e+06	0	-9.01054e+06	2.12349e+06	-1.33609e+06	787400	4.26646e+06	-2.68864e+06	1.57783e+06	2.12349e+06	-1.33609e+06	787400	4.26646e+06	-2.68864e+06	1.57783e+06	2.12349e+06	-1.33609e+06	787400	-1.0911e+07	-2.79557e+06	-8.01984e+06	-7.43271e+06	787400		899130	1.83548e+06	899130	1.83548e+06	-1.07993e+07	-2.53791e+06	-7.90811e+06	-7.17506e+06
2036	-1.47729e+06	-1.16846e+07	0	0	-1.31619e+07	3.11357e+06	-9.69989e+06	1.90999e+06	0	-4.67634e+06	0	-9.69989e+06	0	0	-9.69989e+06	-2.20318e+06	-9.69989e+06	1.90999e+06	0	-9.99308e+06	2.47543e+06	-1.555e+06	920429	5.0757e+06	-3.19347e+06	1.88224e+06	2.47543e+06	-1.555e+06	920429	5.0757e+06	-3.19347e+06	1.88224e+06	2.47543e+06	-1.555e+06	920429	-1.22414e+07	-2.7941e+06	-8.77947e+06	-8.11085e+06	920429		1.04913e+06	2.17823e+06	1.04913e+06	2.17823e+06	-1.21127e+07	-2.49811e+06	-8.65077e+06	-7.81485e+06
2037	-1.74702e+06	-1.29818e+07	0	0	-1.47289e+07	3.44184e+06	-1.06424e+07	1.8594e+06	0	-5.34118e+06	0	-1.06424e+07	0	0	-1.06424e+07	-2.55863e+06	-1.06424e+07	1.8594e+06	0	-1.13416e+07	2.85429e+06	-1.79046e+06	1.06384e+06	5.87503e+06	-3.69271e+06	2.18231e+06	2.85429e+06	-1.79046e+06	1.06384e+06	5.87503e+06	-3.69271e+06	2.18231e+06	2.85429e+06	-1.79046e+06	1.06384e+06	-1.3665e+07	-3.15887e+06	-9.57859e+06	-9.15934e+06	1.06384e+06		1.21126e+06	2.5198e+06	1.21126e+06	2.5198e+06	-1.35176e+07	-2.82138e+06	-9.43116e+06	-8.82185e+06
2038	-2.0396e+06	-1.43622e+07	0	0	-1.64018e+07	3.53232e+06	-1.16383e+07	1.80823e+06	0	-6.29772e+06	0	-1.16383e+07	0	0	-1.16383e+07	-2.64852e+06	-1.16383e+07	1.80823e+06	0	-1.24786e+07	3.26008e+06	-2.04244e+06	1.21763e+06	6.21135e+06	-3.89411e+06	2.31723e+06	3.26008e+06	-2.04244e+06	1.21763e+06	6.21135e+06	-3.89411e+06	2.31723e+06	3.26008e+06	-2.04244e+06	1.21763e+06	-1.51842e+07	-3.98049e+06	-1.04206e+07	-1.01613e+07	1.21763e+06		1.38563e+06	2.67628e+06	1.38563e+06	2.67628e+06	-1.50162e+07	-3.62143e+06	-1.02526e+07	-9.80227e+06
2039	-2.45827e+06	-1.59342e+07	0	0	-1.83925e+07	3.60043e+06	-1.26907e+07	2.07179e+06	0	-7.01848e+06	0	-1.26907e+07	0	0	-1.26907e+07	-2.72013e+06	-1.26907e+07	2.07179e+06	0	-1.3339e+07	3.69278e+06	-2.31095e+06	1.38183e+06	6.57488e+06	-4.11145e+06	2.46343e+06	3.69278e+06	-2.31095e+06	1.38183e+06	6.57488e+06	-4.11145e+06	2.46343e+06	3.69278e+06	-2.31095e+06	1.38183e+06	-1.70106e+07	-4.55505e+06	-1.13089e+07	-1.08756e+07	1.38183e+06		1.5723e+06	2.84487e+06	1.5723e+06	2.84487e+06	-1.68202e+07	-4.17362e+06	-1.11184e+07	-1.04942e+07
2040	-2.98515e+06	-1.75676e+07	-67835.4	-56181.5	-2.06768e+07	3.64856e+06	-1.38028e+07	2.01776e+06	0	-8.13649e+06	0	-1.38028e+07	0	0	-1.38028e+07	-3.05849e+06	-1.38028e+07	2.01776e+06	0	-1.48435e+07	4.15241e+06	-2.59396e+06	1.55845e+06	7.45471e+06	-4.65625e+06	2.79845e+06	4.15241e+06	-2.59396e+06	1.55845e+06	7.45471e+06	-4.65625e+06	2.79845e+06	4.15241e+06	-2.59396e+06	1.55845e+06	-1.91184e+07	-5.33804e+06	-1.22444e+07	-1.20451e+07	1.55845e+06		1.76525e+06	3.21271e+06	1.76525e+06	3.21271e+06	-1.89116e+07	-4.92378e+06	-1.20376e+07	-1.16308e+07
2041	-3.47445e+06	-1.93648e+07	-135996	-112662	-2.30879e+07	3.67872e+06	-1.49775e+07	1.96259e+06	0	-9.33623e+06	0	-1.49775e+07	0	0	-1.49775e+07	-3.12785e+06	-1.49775e+07	1.96259e+06	0	-1.61428e+07	4.18859e+06	-2.60682e+06	1.58177e+06	7.86321e+06	-4.90159e+06	2.96162e+06	4.63895e+06	-2.89332e+06	1.74563e+06	7.86321e+06	-4.90159e+06	2.96162e+06	4.63895e+06	-2.89332e+06	1.74563e+06	-2.15061e+07	-6.3746e+06	-1.32319e+07	-1.31812e+07	1.74563e+06		1.79217e+06	3.39689e+06	1.97026e+06	3.39689e+06	-2.12957e+07	-5.93934e+06	-1.30073e+07	-1.27459e+07
2042	-4.0515e+06	-2.13262e+07	-204493	-168120	-2.57504e+07	3.69259e+06	-1.62176e+07	2.22604e+06	0	-1.0299e+07	0	-1.62176e+07	0	0	-1.62176e+07	-3.17971e+06	-1.62176e+07	2.22604e+06	0	-1.71713e+07	4.25203e+06	-2.63668e+06	1.61535e+06	8.29884e+06	-5.16213e+06	3.13671e+06	5.15242e+06	-3.20904e+06	1.94338e+06	8.29884e+06	-5.16213e+06	3.13671e+06	5.15242e+06	-3.20904e+06	1.94338e+06	-2.4135e+07	-7.16228e+06	-1.42742e+07	-1.40346e+07	1.94338e+06		1.82993e+06	3.59297e+06	2.18739e+06	3.59297e+06	-2.39204e+07	-6.70601e+06	-1.40302e+07	-1.35783e+07
2043	-4.56411e+06	-2.32952e+07	-235511	-223403	-2.83183e+07	3.959e+06	-1.74503e+07	2.43445e+06	-33258.4	-1.10901e+07	0	-1.74503e+07	0	-33258.4	-1.74835e+07	-3.50378e+06	-1.74503e+07	2.46336e+06	-33258.4	-1.85239e+07	4.34269e+06	-2.68313e+06	1.65956e+06	9.25922e+06	-5.75189e+06	3.50733e+06	5.69281e+06	-3.53756e+06	2.15524e+06	9.25922e+06	-5.75189e+06	3.50733e+06	5.69281e+06	-3.53756e+06	2.15524e+06	-2.66587e+07	-7.58274e+06	-1.53283e+07	-1.50166e+07	2.15524e+06		1.8759e+06	3.99222e+06	2.41319e+06	3.99222e+06	-2.64424e+07	-7.09785e+06	-1.50703e+07	-1.45317e+07
2044	-5.09301e+06	-2.52705e+07	-266642	-278860	-3.0909e+07	4.31132e+06	-1.87418e+07	2.33554e+06	-66607.7	-1.21615e+07	0	-1.87418e+07	0	-66607.7	-1.88084e+07	-3.82802e+06	-1.87418e+07	2.4009e+06	-66607.7	-2.02355e+07	4.58267e+06	-2.82587e+06	1.7568e+06	9.96504e+06	-6.1791e+06	3.78594e+06	6.12326e+06	-3.79501e+06	2.32825e+06	1.00712e+07	-6.24666e+06	3.82457e+06	6.24541e+06	-3.87272e+06	2.37269e+06	-2.91522e+07	-8.37558e+06	-1.64801e+07	-1.64109e+07	2.37269e+06		1.98106e+06	4.29316e+06	2.59684e+06	4.33513e+06	-2.8928e+07	-7.86835e+06	-1.62115e+07	-1.59004e+07
2045	-5.56397e+06	-2.7251e+07	-297890	-334499	-3.34474e+07	4.69092e+06	-2.00958e+07	2.57959e+06	-100053	-1.29253e+07	0	-2.00958e+07	0	-100053	-2.01959e+07	-3.90639e+06	-2.00958e+07	2.65259e+06	-100053	-2.14496e+07	4.84972e+06	-2.98644e+06	1.86329e+06	1.02186e+07	-6.31554e+06	3.90306e+06	6.58072e+06	-4.06871e+06	2.51201e+06	1.04583e+07	-6.46786e+06	3.99043e+06	6.82494e+06	-4.22387e+06	2.60107e+06	-3.15841e+07	-9.02228e+06	-1.76838e+07	-1.74592e+07	2.60107e+06		2.09747e+06	4.41698e+06	2.79217e+06	4.51198e+06	-3.13499e+07	-8.50836e+06	-1.74037e+07	-1.69377e+07
2046	-5.97287e+06	-2.92358e+07	-329260	-390328	-3.59283e+07	5.03209e+06	-2.15155e+07	2.80155e+06	-133599	-1.38155e+07	0	-2.15155e+07	0	-133599	-2.16491e+07	-4.24338e+06	-2.15155e+07	2.88222e+06	-133599	-2.30103e+07	5.14383e+06	-3.16382e+06	1.98001e+06	1.10844e+07	-6.84141e+06	4.24303e+06	7.06517e+06	-4.35934e+06	2.70583e+06	1.13514e+07	-7.0101e+06	4.34132e+06	7.4314e+06	-4.59108e+06	2.84031e+06	-3.39482e+07	-9.57243e+06	-1.89433e+07	-1.86689e+07	2.84031e+06		2.2252e+06	4.78345e+06	2.99925e+06	4.8898e+06	-3.37031e+07	-9.03201e+06	-1.86499e+07	-1.81205e+07
2047	-6.31614e+06	-3.1224e+07	-360755	-446354	-3.83472e+07	5.37186e+06	-2.30036e+07	2.71088e+06	-167251	-1.50881e+07	0	-2.30036e+07	0	-167251	-2.31708e+07	-4.57652e+06	-2.30036e+07	2.8067e+06	-167251	-2.49406e+07	5.46497e+06	-3.35787e+06	2.10711e+06	1.19409e+07	-7.36239e+06	4.57847e+06	7.5766e+06	-4.66669e+06	2.90991e+06	1.22351e+07	-7.54686e+06	4.68826e+06	8.06478e+06	-4.97431e+06	3.09047e+06	-3.62401e+07	-1.05096e+07	-2.02609e+07	-2.02524e+07	3.09047e+06		2.36431e+06	5.14822e+06	3.21813e+06	5.266e+06	-3.59829e+07	-9.93985e+06	-1.99527e+07	-1.96746e+07
2048	-6.66795e+06	-3.32954e+07	-392379	-502585	-4.08583e+07	5.47034e+06	-2.45623e+07	2.62727e+06	-201014	-1.66657e+07	0	-2.45623e+07	0	-201014	-2.47633e+07	-4.65572e+06	-2.45623e+07	2.72338e+06	-201014	-2.66957e+07	5.81314e+06	-3.56847e+06	2.24467e+06	1.23362e+07	-7.58725e+06	4.74899e+06	8.11501e+06	-4.99061e+06	3.1244e+06	1.26851e+07	-7.80504e+06	4.88009e+06	8.7251e+06	-5.37353e+06	3.35157e+06	-3.86136e+07	-1.19167e+07	-2.16389e+07	-2.18156e+07	3.35157e+06		2.51485e+06	5.33262e+06	3.44888e+06	5.47269e+06	-3.83434e+07	-1.13331e+07	-2.13144e+07	-2.1223e+07
2049	-7.0277e+06	-3.54512e+07	-424135	-559027	-4.34621e+07	5.52642e+06	-2.61936e+07	2.85678e+06	-234891	-1.80453e+07	0	-2.61936e+07	0	-234891	-2.64285e+07	-4.69768e+06	-2.61936e+07	2.9532e+06	-234891	-2.8173e+07	6.18832e+06	-3.79555e+06	2.39277e+06	1.27861e+07	-7.84555e+06	4.94052e+06	8.68038e+06	-5.33095e+06	3.34943e+06	1.31349e+07	-8.06183e+06	5.07305e+06	9.41233e+06	-5.7887e+06	3.62363e+06	-4.10693e+07	-1.31048e+07	-2.30791e+07	-2.30999e+07	3.62363e+06		2.67689e+06	5.53944e+06	3.69156e+06	5.68029e+06	-4.07852e+07	-1.25059e+07	-2.2737e+07	-2.24927e+07
2050	-7.39495e+06	-3.76926e+07	-453408	-615688	-4.61567e+07	5.55701e+06	-2.78991e+07	2.77144e+06	-266314	-1.9837e+07	0	-2.78991e+07	0	-268889	-2.8168e+07	-5.0018e+06	-2.78991e+07	2.875e+06	-268889	-3.02948e+07	6.5905e+06	-4.03105e+06	2.55946e+06	1.37507e+07	-8.41469e+06	5.336e+06	9.27271e+06	-5.676e+06	3.59671e+06	1.40994e+07	-8.62934e+06	5.47009e+06	1.01265e+07	-6.2061e+06	3.9204e+06	-4.35972e+07	-1.4501e+07	-2.45713e+07	-2.48247e+07	3.9204e+06		2.83043e+06	5.90439e+06	3.917e+06	6.04578e+06	-4.33262e+07	-1.39326e+07	-2.4251e+07	-2.4249e+07
2051	-7.7695e+06	-4.00203e+07	-482780	-672575	-4.89452e+07	5.56465e+06	-2.968e+07	2.68514e+06	-297819	-2.1728e+07	0	-2.968e+07	0	-303010	-2.9983e+07	-5.04956e+06	-2.968e+07	2.78893e+06	-303010	-3.22437e+07	7.01968e+06	-4.28234e+06	2.73734e+06	1.42455e+07	-8.69133e+06	5.55415e+06	9.89201e+06	-6.03672e+06	3.85529e+06	1.46215e+07	-8.92161e+06	5.69987e+06	1.08676e+07	-6.63879e+06	4.2288e+06	-4.62078e+07	-1.61739e+07	-2.61277e+07	-2.65438e+07	4.2288e+06		2.99426e+06	6.10316e+06	4.15301e+06	6.25485e+06	-4.59509e+07	-1.56249e+07	-2.583e+07	-2.59888e+07
2052	-8.14678e+06	-4.24351e+07	-512255	-725095	-5.18192e+07	5.55148e+06	-3.15418e+07	2.88268e+06	-329408	-2.34371e+07	0	-3.15418e+07	0	-334599	-3.18764e+07	-5.06181e+06	-3.15418e+07	3.01365e+06	-334599	-3.39246e+07	7.47584e+06	-4.54937e+06	2.92647e+06	1.47673e+07	-8.98244e+06	5.78487e+06	1.05383e+07	-6.41302e+06	4.12524e+06	1.51433e+07	-9.21151e+06	5.93175e+06	1.16356e+07	-7.08676e+06	4.54885e+06	-4.88927e+07	-1.76522e+07	-2.77512e+07	-2.79929e+07	4.54885e+06		3.16841e+06	6.31236e+06	4.39965e+06	6.46463e+06	-4.86508e+07	-1.71247e+07	-2.74768e+07	-2.746e+07
2053	-8.53109e+06	-4.49339e+07	-541837	-777782	-5.47846e+07	5.78676e+06	-3.34776e+07	3.05692e+06	-361086	-2.4995e+07	0	-3.34776e+07	0	-366278	-3.38439e+07	-5.34173e+06	-3.34776e+07	3.22206e+06	-366278	-3.59635e+07	7.95899e+06	-4.83208e+06	3.1269e+06	1.57068e+07	-9.53383e+06	6.17292e+06	1.12115e+07	-6.80483e+06	4.40662e+06	1.61886e+07	-9.82762e+06	6.36101e+06	1.24305e+07	-7.54996e+06	4.88057e+06	-5.16577e+07	-1.88221e+07	-2.94372e+07	-2.96025e+07	4.88057e+06		3.35293e+06	6.67151e+06	4.65694e+06	6.86221e+06	-5.14317e+07	-1.83235e+07	-2.91869e+07	-2.91013e+07
2054	-8.92299e+06	-4.75172e+07	-571529	-830643	-5.78424e+07	6.10334e+06	-3.54875e+07	2.95131e+06	-392858	-2.68257e+07	0	-3.54875e+07	0	-398050	-3.58855e+07	-5.63691e+06	-3.54875e+07	3.1307e+06	-398050	-3.83917e+07	8.46911e+06	-5.13043e+06	3.33867e+06	1.66349e+07	-1.00776e+07	6.55732e+06	1.19116e+07	-7.21212e+06	4.69949e+06	1.725e+07	-1.0453e+07	6.797e+06	1.32524e+07	-8.02839e+06	5.224e+06	-5.45037e+07	-2.02683e+07	-3.1186e+07	-3.15947e+07	5.224e+06		3.54785e+06	7.02813e+06	4.92494e+06	7.26718e+06	-5.42945e+07	-1.97975e+07	-3.09606e+07	-3.11245e+07
2055	-9.32297e+06	-5.01856e+07	-601334	-883684	-6.09935e+07	6.44448e+06	-3.75716e+07	3.15953e+06	-424728	-2.83923e+07	0	-3.75716e+07	0	-429920	-3.80015e+07	-5.66915e+06	-3.75716e+07	3.34627e+06	-429920	-4.03244e+07	9.00619e+06	-5.44438e+06	3.56182e+06	1.71904e+07	-1.03866e+07	6.80375e+06	1.26387e+07	-7.63484e+06	5.00387e+06	1.786e+07	-1.0794e+07	7.06598e+06	1.41012e+07	-8.52203e+06	5.57916e+06	-5.74317e+07	-2.15886e+07	-3.29977e+07	-3.32584e+07	5.57916e+06		3.75323e+06	7.25309e+06	5.20369e+06	7.5126e+06	-5.72403e+07	-2.11392e+07	-3.27979e+07	-3.28118e+07
2056	-9.73151e+06	-5.29392e+07	-631255	-936911	-6.42389e+07	6.74486e+06	-3.97303e+07	3.34627e+06	-456699	-3.00958e+07	0	-3.97303e+07	0	-461891	-4.01921e+07	-5.95632e+06	-3.97303e+07	3.54734e+06	-461891	-4.26011e+07	9.57025e+06	-5.77388e+06	3.79637e+06	1.82782e+07	-1.10253e+07	7.25297e+06	1.33927e+07	-8.07293e+06	5.31981e+06	1.89751e+07	-1.14471e+07	7.52799e+06	1.49769e+07	-9.03084e+06	5.94605e+06	-6.04425e+07	-2.28429e+07	-3.48723e+07	-3.50731e+07	5.94605e+06		3.9691e+06	7.66914e+06	5.49322e+06	7.93945e+06	-6.02698e+07	-2.24267e+07	-3.46989e+07	-3.46617e+07
2057	-1.01491e+07	-5.46158e+07	-1.86369e+06	-2.18636e+06	-6.8815e+07	7.04272e+06	-4.19635e+07	3.2349e+06	-488776	-3.21747e+07	0	-4.19635e+07	0	-493968	-4.24575e+07	-6.25553e+06	-4.19635e+07	3.4434e+06	-493968	-4.52696e+07	1.01613e+07	-6.1189e+06	4.04236e+06	1.93568e+07	-1.16577e+07	7.69907e+06	1.41737e+07	-8.52638e+06	5.64734e+06	2.01081e+07	-1.2111e+07	7.99714e+06	1.58795e+07	-9.55482e+06	6.3247e+06	-6.47726e+07	-2.44756e+07	-3.68101e+07	-3.72725e+07	6.3247e+06		4.1955e+06	8.08359e+06	5.79357e+06	8.37449e+06	-6.46195e+07	-2.40911e+07	-3.66639e+07	-3.68951e+07
2058	-9.42738e+06	-5.62066e+07	-3.09172e+06	-3.43151e+06	-7.21572e+07	7.09688e+06	-4.42678e+07	3.12328e+06	-520962	-3.45686e+07	0	-4.42678e+07	0	-526154	-4.4794e+07	-6.28449e+06	-4.42678e+07	3.33231e+06	-526154	-4.77462e+07	6.92483e+06	-4.081e+06	2.84383e+06	2.00024e+07	-1.20174e+07	7.98499e+06	1.49817e+07	-8.99516e+06	5.9865e+06	2.07809e+07	-1.24852e+07	8.2957e+06	1.68091e+07	-1.0094e+07	6.71512e+06	-6.93134e+07	-2.65836e+07	-3.88075e+07	-3.94505e+07	6.71512e+06		3.05505e+06	8.34503e+06	6.1048e+06	8.64685e+06	-6.91022e+07	-2.62236e+07	-3.86892e+07	-3.90993e+07
2059	-8.55866e+06	-5.77333e+07	-4.30548e+06	-4.66253e+06	-7.526e+07	7.10638e+06	-4.66433e+07	3.31734e+06	-553261	-3.67729e+07	0	-4.66433e+07	0	-558453	-4.72018e+07	-6.27393e+06	-4.66433e+07	3.52692e+06	-558453	-4.99488e+07	3.71619e+06	-2.06757e+06	1.64862e+06	2.06749e+07	-1.2392e+07	8.28297e+06	1.58165e+07	-9.47922e+06	6.33729e+06	2.14534e+07	-1.28574e+07	8.59601e+06	1.77656e+07	-1.06482e+07	7.11734e+06	-7.36114e+07	-2.84899e+07	-4.08645e+07	-4.13528e+07	7.11734e+06		1.91925e+06	8.61714e+06	6.42694e+06	8.92016e+06	-7.33408e+07	-2.81557e+07	-4.07748e+07	-4.10286e+07
2060	-7.56143e+06	-5.92148e+07	-5.50765e+06	-5.88212e+06	-7.8166e+07	7.08903e+06	-4.90901e+07	3.20354e+06	-585677	-3.93832e+07	0	-4.90901e+07	0	-590868	-4.96809e+07	-6.52529e+06	-4.90901e+07	3.42065e+06	-590868	-5.27856e+07	535285	-98308.8	436976	2.18616e+07	-1.30873e+07	8.77429e+06	1.66783e+07	-9.97856e+06	6.69975e+06	2.264e+07	-1.35505e+07	9.08948e+06	1.8749e+07	-1.12176e+07	7.53136e+06	-7.7729e+07	-3.06089e+07	-4.29812e+07	-4.36961e+07	7.53136e+06		788154	9.07404e+06	6.76004e+06	9.37826e+06	-7.73779e+07	-3.03091e+07	-4.29209e+07	-4.34073e+07
2061	-6.45183e+06	-6.06674e+07	-6.70035e+06	-7.09236e+06	-8.09119e+07	7.04749e+06	-5.16082e+07	3.08888e+06	-618212	-4.209e+07	0	-5.16082e+07	0	-623404	-5.22316e+07	-6.51883e+06	-5.16082e+07	3.30661e+06	-623404	-5.54438e+07	-2.61795e+06	1.83219e+06	-785759	2.25791e+07	-1.34898e+07	9.08921e+06	1.7567e+07	-1.04931e+07	7.0739e+06	2.33847e+07	-1.39681e+07	9.41654e+06	1.97593e+07	-1.18021e+07	7.9572e+06	-8.16977e+07	-3.30008e+07	-4.51577e+07	-4.60272e+07	7.9572e+06		-338204	9.36511e+06	7.10412e+06	9.68029e+06	-8.12501e+07	-3.27249e+07	-4.51274e+07	-4.57635e+07
2062	-5.24409e+06	-6.21056e+07	-7.88518e+06	-8.29488e+06	-8.35297e+07	6.98405e+06	-5.41977e+07	3.28511e+06	-650872	-4.45794e+07	0	-5.41977e+07	0	-656063	-5.48537e+07	-6.47542e+06	-5.41977e+07	3.50348e+06	-656063	-5.78257e+07	-5.74358e+06	3.72817e+06	-2.01541e+06	2.33235e+07	-1.39066e+07	9.41689e+06	1.84827e+07	-1.1023e+07	7.45975e+06	2.41291e+07	-1.43832e+07	9.74589e+06	2.07965e+07	-1.24016e+07	8.39487e+06	-8.55451e+07	-3.51625e+07	-4.7394e+07	-4.80798e+07	8.39487e+06		-1.45978e+06	9.66695e+06	7.45925e+06	9.98338e+06	-8.49895e+07	-3.49124e+07	-4.73945e+07	-4.78423e+07
2063	-3.95629e+06	-6.3542e+07	-9.06342e+06	-9.49092e+06	-8.60527e+07	7.16738e+06	-5.68533e+07	3.43122e+06	-683658	-4.69383e+07	0	-5.68533e+07	0	-688850	-5.75421e+07	-6.70014e+06	-5.68533e+07	3.68414e+06	-688850	-6.05581e+07	-8.84164e+06	5.59284e+06	-3.2488e+06	2.4591e+07	-1.46494e+07	9.94153e+06	1.94253e+07	-1.1568e+07	7.85733e+06	2.53964e+07	-1.51243e+07	1.02722e+07	2.18607e+07	-1.30163e+07	8.84439e+06	-8.93015e+07	-3.69968e+07	-4.96848e+07	-5.02859e+07	8.84439e+06		-2.57653e+06	1.01569e+07	7.82546e+06	1.04746e+07	-8.86292e+07	-3.67814e+07	-4.97167e+07	-5.00835e+07
2064	-2.59982e+06	-6.49881e+07	-1.0236e+07	-1.06815e+07	-8.85054e+07	7.43043e+06	-5.9575e+07	3.27758e+06	-716576	-4.95835e+07	0	-5.9575e+07	0	-721768	-6.02967e+07	-6.94035e+06	-5.9575e+07	3.56514e+06	-721768	-6.36719e+07	-1.19122e+07	7.42874e+06	-4.48345e+06	2.57413e+07	-1.53182e+07	1.0423e+07	2.03949e+07	-1.21282e+07	8.26664e+06	2.66798e+07	-1.58745e+07	1.08053e+07	2.29518e+07	-1.3646e+07	9.30576e+06	-9.29889e+07	-3.91605e+07	-5.20301e+07	-5.28666e+07	9.30576e+06		-3.68842e+06	1.06071e+07	8.20278e+06	1.09736e+07	-9.21939e+07	-3.89765e+07	-5.2094e+07	-5.26984e+07
2065	-1.18491e+06	-6.64539e+07	-1.14038e+07	-1.18673e+07	-9.09099e+07	7.71767e+06	-6.23628e+07	3.45784e+06	-749628	-5.19369e+07	0	-6.23628e+07	0	-754819	-6.31176e+07	-6.91671e+06	-6.23628e+07	3.75318e+06	-754819	-6.62812e+07	-1.49553e+07	9.23784e+06	-5.71743e+06	2.64407e+07	-1.57027e+07	1.0738e+07	2.13913e+07	-1.27036e+07	8.68772e+06	2.75123e+07	-1.63402e+07	1.11722e+07	2.40698e+07	-1.42908e+07	9.779e+06	-9.66274e+07	-4.11989e+07	-5.44299e+07	-5.5109e+07	9.779e+06		-4.7954e+06	1.08978e+07	8.59127e+06	1.13133e+07	-9.57053e+07	-4.10392e+07	-5.45264e+07	-5.49678e+07
2066	279252	-6.79484e+07	-1.25674e+07	-1.3049e+07	-9.32856e+07	7.9639e+06	-6.52168e+07	3.61671e+06	-782816	-5.4419e+07	0	-6.52168e+07	0	-788007	-6.60048e+07	-7.14892e+06	-6.52168e+07	3.92681e+06	-788007	-6.92269e+07	-1.79709e+07	1.10217e+07	-6.94921e+06	2.77507e+07	-1.64659e+07	1.12847e+07	2.24147e+07	-1.32942e+07	9.12057e+06	2.88495e+07	-1.71179e+07	1.17316e+07	2.52147e+07	-1.49506e+07	1.02641e+07	-1.00235e+08	-4.31343e+07	-5.68843e+07	-5.74953e+07	1.02641e+07		-5.89744e+06	1.14079e+07	8.99096e+06	1.18349e+07	-9.9183e+07	-4.30111e+07	-5.70139e+07	-5.73921e+07
2067	1.78435e+06	-6.94797e+07	-1.37271e+07	-1.42271e+07	-9.56496e+07	8.2075e+06	-6.69187e+07	3.47061e+06	-2.0926e+06	-5.73332e+07	0	-6.8137e+07	0	-821336	-6.89583e+07	-7.39373e+06	-6.8137e+07	3.79553e+06	-821336	-7.25565e+07	-2.09591e+07	1.27815e+07	-8.17762e+06	2.90513e+07	-1.72234e+07	1.18279e+07	2.34651e+07	-1.38999e+07	9.5652e+06	3.02046e+07	-1.79063e+07	1.22983e+07	2.63866e+07	-1.56254e+07	1.07611e+07	-1.03827e+08	-4.55053e+07	-5.93931e+07	-6.02582e+07	1.07611e+07		-6.99448e+06	1.19167e+07	9.4019e+06	1.23649e+07	-1.02644e+08	-4.54165e+07	-5.95564e+07	-6.01916e+07
2068	3.31675e+06	-7.1055e+07	-1.48836e+07	-1.54019e+07	-9.80237e+07	8.3267e+06	-6.85203e+07	3.33128e+06	-3.39774e+06	-6.02601e+07	0	-7.11172e+07	0	-854807	-7.1972e+07	-7.36858e+06	-7.11172e+07	3.6572e+06	-854807	-7.56834e+07	-2.392e+07	1.45183e+07	-9.40171e+06	2.78425e+07	-1.64145e+07	1.14281e+07	2.45423e+07	-1.45207e+07	1.00216e+07	3.10998e+07	-1.84049e+07	1.26949e+07	2.75853e+07	-1.63153e+07	1.127e+07	-1.07425e+08	-4.8832e+07	-6.19504e+07	-6.29885e+07	1.127e+07		-8.08649e+06	1.15301e+07	9.82413e+06	1.27327e+07	-1.0611e+08	-4.873e+07	-6.21479e+07	-6.29507e+07
2069	4.86958e+06	-7.26807e+07	-1.60369e+07	-1.65737e+07	-1.00422e+08	8.42743e+06	-7.00398e+07	3.49771e+06	-4.68772e+06	-6.28024e+07	0	-7.41575e+07	0	-888425	-7.50459e+07	-7.30473e+06	-7.41575e+07	3.82466e+06	-888425	-7.8526e+07	-2.68535e+07	1.62328e+07	-1.06207e+07	2.66883e+07	-1.56423e+07	1.10461e+07	2.56465e+07	-1.51567e+07	1.04898e+07	3.19948e+07	-1.89015e+07	1.30933e+07	2.8811e+07	-1.70202e+07	1.17908e+07	-1.11042e+08	-5.17563e+07	-6.45561e+07	-6.54327e+07	1.17908e+07		-9.17342e+06	1.1161e+07	1.02577e+07	1.31017e+07	-1.09595e+08	-5.16414e+07	-6.47882e+07	-6.54243e+07
2070	6.43665e+06	-7.43626e+07	-1.71874e+07	-1.77429e+07	-1.02856e+08	8.67402e+06	-7.14929e+07	3.35637e+06	-5.96543e+06	-6.5428e+07	0	-7.72577e+07	0	-922191	-7.81799e+07	-7.50351e+06	-7.72577e+07	3.69134e+06	-922191	-8.19921e+07	-2.97597e+07	1.79257e+07	-1.18341e+07	2.6048e+07	-1.52061e+07	1.08419e+07	2.67776e+07	-1.58078e+07	1.09699e+07	3.34034e+07	-1.97189e+07	1.36845e+07	3.00636e+07	-1.77402e+07	1.23235e+07	-1.1469e+08	-5.45861e+07	-6.721e+07	-6.83075e+07	1.23235e+07		-1.02552e+07	1.09739e+07	1.07026e+07	1.36559e+07	-1.13112e+08	-5.44541e+07	-6.74773e+07	-6.83362e+07
2071	8.01238e+06	-7.61059e+07	-1.83353e+07	-1.89096e+07	-1.05338e+08	8.92631e+06	-7.28934e+07	3.21425e+06	-7.23308e+06	-6.79859e+07	0	-8.04179e+07	0	-956110	-8.1374e+07	-7.44486e+06	-8.04179e+07	3.55034e+06	-956110	-8.52685e+07	-3.26386e+07	1.95974e+07	-1.30413e+07	2.49392e+07	-1.44895e+07	1.04497e+07	2.79357e+07	-1.6474e+07	1.14617e+07	3.43705e+07	-2.02608e+07	1.41098e+07	3.13432e+07	-1.84751e+07	1.28681e+07	-1.1838e+08	-5.75362e+07	-6.99123e+07	-7.11587e+07	1.28681e+07		-1.13319e+07	1.06181e+07	1.1159e+07	1.40543e+07	-1.1667e+08	-5.73678e+07	-7.0215e+07	-7.12142e+07
2072	9.59172e+06	-7.73212e+07	-1.80022e+07	-2.0074e+07	-1.05806e+08	9.18323e+06	-7.36592e+07	3.38151e+06	-8.4924e+06	-6.95869e+07	0	-8.16764e+07	0	-2.44344e+06	-8.41199e+07	-7.35019e+06	-8.3044e+07	3.74569e+06	-990183	-8.76387e+07	-3.54903e+07	2.12484e+07	-1.42419e+07	2.38575e+07	-1.37973e+07	1.00602e+07	2.91206e+07	-1.71552e+07	1.19654e+07	3.53374e+07	-2.08001e+07	1.45373e+07	3.26497e+07	-1.9225e+07	1.34246e+07	-1.20048e+08	-5.95267e+07	-7.21545e+07	-7.31014e+07	1.34246e+07		-1.24034e+07	1.02703e+07	1.16267e+07	1.44542e+07	-1.18209e+08	-5.93166e+07	-7.24931e+07	-7.31845e+07
2073	9.78128e+06	-7.87099e+07	-1.76656e+07	-2.12281e+07	-1.07822e+08	9.17256e+06	-7.43965e+07	3.23363e+06	-9.74109e+06	-7.17314e+07	0	-8.28251e+07	0	-3.92401e+06	-8.67491e+07	-7.53878e+06	-8.57238e+07	3.63278e+06	-1.02402e+06	-9.06538e+07	-3.5982e+07	2.14176e+07	-1.45644e+07	2.31929e+07	-1.33683e+07	9.82461e+06	2.79592e+07	-1.63667e+07	1.15925e+07	3.68268e+07	-2.1657e+07	1.51698e+07	3.39423e+07	-1.99569e+07	1.39854e+07	-1.22387e+08	-6.19068e+07	-7.51566e+07	-7.5484e+07	1.39854e+07		-1.26268e+07	1.00646e+07	1.12505e+07	1.50341e+07	-1.20449e+08	-6.16668e+07	-7.54986e+07	-7.56197e+07
2074	9.69716e+06	-8.02561e+07	-1.73446e+07	-2.23797e+07	-1.10283e+08	9.20646e+06	-7.51128e+07	3.1044e+06	-1.09833e+07	-7.37853e+07	0	-8.38812e+07	0	-5.38679e+06	-8.9268e+07	-7.47155e+06	-8.84548e+07	3.51861e+06	-1.05801e+06	-9.34657e+07	-3.64467e+07	2.15722e+07	-1.48746e+07	2.20508e+07	-1.26482e+07	9.40257e+06	2.68249e+07	-1.5599e+07	1.12259e+07	3.78657e+07	-2.22321e+07	1.56336e+07	3.52619e+07	-2.07036e+07	1.45584e+07	-1.25158e+08	-6.43827e+07	-7.80421e+07	-7.78321e+07	1.45584e+07		-1.28412e+07	9.68731e+06	1.08824e+07	1.5455e+07	-1.23124e+08	-6.4098e+07	-7.83856e+07	-7.80107e+07
2075	9.3764e+06	-8.18027e+07	-1.72267e+07	-2.30406e+07	-1.12694e+08	9.23573e+06	-7.58142e+07	3.19956e+06	-1.16305e+07	-7.50094e+07	0	-8.4859e+07	0	-6.1639e+06	-9.10229e+07	-7.38754e+06	-9.1234e+07	3.62195e+06	-1.09215e+06	-9.60918e+07	-3.68845e+07	2.15977e+07	-1.52868e+07	2.10143e+07	-1.2296e+07	8.7183e+06	2.57177e+07	-1.51825e+07	1.05352e+07	3.89316e+07	-2.25138e+07	1.64178e+07	3.66085e+07	-2.10773e+07	1.55312e+07	-1.2798e+08	-6.62911e+07	-8.04876e+07	-7.96739e+07	1.55312e+07		-1.29201e+07	9.64413e+06	1.08406e+07	1.55797e+07	-1.25614e+08	-6.53652e+07	-8.01823e+07	-8.05121e+07
2076	8.98121e+06	-8.34722e+07	-1.69913e+07	-2.42516e+07	-1.15734e+08	9.20049e+06	-7.65056e+07	3.06667e+06	-1.28622e+07	-7.71006e+07	0	-8.57698e+07	0	-7.60016e+06	-9.33699e+07	-7.56528e+06	-9.40581e+07	3.50423e+06	-1.12645e+06	-9.92456e+07	-3.77945e+07	2.20552e+07	-1.57393e+07	2.05096e+07	-1.19831e+07	8.52641e+06	2.46378e+07	-1.44776e+07	1.01602e+07	4.05018e+07	-2.34167e+07	1.70851e+07	3.79819e+07	-2.18538e+07	1.61281e+07	-1.31473e+08	-6.85742e+07	-8.32097e+07	-8.21606e+07	1.61281e+07		-1.32949e+07	9.49178e+06	1.04888e+07	1.61934e+07	-1.29029e+08	-6.76088e+07	-8.28811e+07	-8.30523e+07
2077	8.39982e+06	-8.51026e+07	-1.67416e+07	-2.52624e+07	-1.18707e+08	9.1433e+06	-7.71912e+07	2.93565e+06	-1.39311e+07	-7.90433e+07	0	-8.66231e+07	0	-8.84861e+06	-9.54717e+07	-7.48324e+06	-9.54342e+07	3.37749e+06	-2.56656e+06	-1.02106e+08	-3.86775e+07	2.2443e+07	-1.62345e+07	1.95183e+07	-1.14385e+07	8.07982e+06	2.3585e+07	-1.38719e+07	9.7131e+06	4.16126e+07	-2.39557e+07	1.76569e+07	3.93823e+07	-2.25492e+07	1.68331e+07	-1.34941e+08	-7.09635e+07	-8.57586e+07	-8.44496e+07	1.68331e+07		-1.36007e+07	9.2326e+06	1.02174e+07	1.65686e+07	-1.32307e+08	-6.98107e+07	-8.52543e+07	-8.55379e+07
2078	7.79632e+06	-8.66875e+07	-1.65212e+07	-2.64695e+07	-1.21882e+08	9.16379e+06	-7.78742e+07	3.11478e+06	-1.51233e+07	-8.0719e+07	0	-8.74267e+07	0	-1.02663e+07	-9.76931e+07	-7.36958e+06	-9.66752e+07	3.55803e+06	-4.19417e+06	-1.04681e+08	-3.95334e+07	2.2878e+07	-1.66555e+07	1.85506e+07	-1.08419e+07	7.70871e+06	2.25593e+07	-1.32192e+07	9.3401e+06	4.01515e+07	-2.29657e+07	1.71858e+07	4.08096e+07	-2.33555e+07	1.74541e+07	-1.38537e+08	-7.30103e+07	-8.8353e+07	-8.74951e+07	1.74541e+07		-1.39586e+07	8.91261e+06	9.88211e+06	1.61017e+07	-1.3584e+08	-7.18064e+07	-8.7811e+07	-8.85793e+07
2079	7.18409e+06	-8.82209e+07	-1.63064e+07	-2.76746e+07	-1.25018e+08	9.17257e+06	-7.85574e+07	2.97056e+06	-1.63117e+07	-8.2726e+07	0	-8.81873e+07	0	-1.16767e+07	-9.9864e+07	-7.52513e+06	-9.77986e+07	3.41527e+06	-5.80218e+06	-1.07711e+08	-4.03624e+07	2.32992e+07	-1.70632e+07	1.81297e+07	-1.05899e+07	7.53979e+06	2.15607e+07	-1.25901e+07	8.97065e+06	3.92102e+07	-2.23058e+07	1.69044e+07	4.22639e+07	-2.41766e+07	1.80872e+07	-1.42081e+08	-7.51862e+07	-9.08934e+07	-9.08063e+07	1.80872e+07		-1.4308e+07	8.78689e+06	9.55513e+06	1.58187e+07	-1.39326e+08	-7.39391e+07	-9.03089e+07	-9.18919e+07
2080	6.57502e+06	-8.96971e+07	-1.60963e+07	-2.88779e+07	-1.28096e+08	9.33285e+06	-7.92428e+07	2.82518e+06	-1.74967e+07	-8.45815e+07	0	-8.89103e+07	0	-1.30807e+07	-1.01991e+08	-7.40129e+06	-9.88183e+07	3.27833e+06	-7.39419e+06	-1.10335e+08	-4.11643e+07	2.37058e+07	-1.74585e+07	1.72161e+07	-1.00331e+07	7.18305e+06	2.05893e+07	-1.19833e+07	8.60596e+06	3.77763e+07	-2.13572e+07	1.64191e+07	4.3745e+07	-2.50125e+07	1.87325e+07	-1.45555e+08	-7.73984e+07	-9.33851e+07	-9.39164e+07	1.87325e+07		-1.46488e+07	8.48437e+06	9.2365e+06	1.53583e+07	-1.42745e+08	-7.60971e+07	-9.27545e+07	-9.49771e+07
2081	5.9797e+06	-9.11108e+07	-1.58903e+07	-3.00795e+07	-1.31101e+08	9.50358e+06	-7.9932e+07	3.0055e+06	-1.86784e+07	-8.61013e+07	0	-8.96004e+07	0	-1.4479e+07	-1.04079e+08	-7.27677e+06	-9.97459e+07	3.4602e+06	-8.97299e+06	-1.12535e+08	-4.19393e+07	2.40976e+07	-1.78417e+07	1.63297e+07	-9.4934e+06	6.83628e+06	1.96449e+07	-1.13979e+07	8.24697e+06	3.63968e+07	-2.04556e+07	1.59412e+07	4.52531e+07	-2.58632e+07	1.939e+07	-1.48943e+08	-7.9265e+07	-9.58325e+07	-9.65942e+07	1.939e+07		-1.49811e+07	8.1903e+06	8.92623e+06	1.49153e+07	-1.46082e+08	-7.7911e+07	-9.51532e+07	-9.76201e+07
2082	5.40762e+06	-9.25375e+07	-1.56878e+07	-3.12794e+07	-1.34097e+08	9.68305e+06	-8.06262e+07	2.86235e+06	-1.9857e+07	-8.79378e+07	0	-9.02616e+07	0	-1.58723e+07	-1.06134e+08	-7.42277e+06	-1.00591e+08	3.31866e+06	-1.05407e+07	-1.15236e+08	-4.26873e+07	2.44742e+07	-1.8213e+07	1.599e+07	-9.29749e+06	6.69247e+06	1.87277e+07	-1.08332e+07	7.89442e+06	3.55368e+07	-1.98909e+07	1.56459e+07	4.67881e+07	-2.67285e+07	2.00596e+07	-1.5231e+08	-8.12453e+07	-9.82394e+07	-9.959e+07	2.00596e+07		-1.53047e+07	8.09061e+06	8.62437e+06	1.46564e+07	-1.49402e+08	-7.98472e+07	-9.75095e+07	-1.0058e+08
2083	4.79006e+06	-9.39747e+07	-1.54884e+07	-3.24778e+07	-1.37151e+08	9.62023e+06	-8.13262e+07	2.69102e+06	-2.10326e+07	-9.00476e+07	0	-9.08972e+07	0	-1.72609e+07	-1.08158e+08	-7.28967e+06	-1.01362e+08	3.18284e+06	-1.20991e+07	-1.17568e+08	-4.34082e+07	2.48355e+07	-1.85727e+07	1.51576e+07	-8.79604e+06	6.36161e+06	1.78375e+07	-1.02886e+07	7.54891e+06	3.41844e+07	-1.90288e+07	1.51555e+07	4.835e+07	-2.76087e+07	2.07414e+07	-1.55724e+08	-8.3686e+07	-1.00609e+08	-1.02412e+08	2.07414e+07		-1.56196e+07	7.81423e+06	8.33095e+06	1.422e+07	-1.5277e+08	-8.22334e+07	-9.98271e+07	-1.03348e+08
2084	4.13268e+06	-9.54196e+07	-1.5292e+07	-3.36746e+07	-1.40253e+08	9.60623e+06	-8.20327e+07	2.84531e+06	-2.22054e+07	-9.17866e+07	0	-9.15101e+07	0	-1.86453e+07	-1.10155e+08	-7.15908e+06	-1.02066e+08	3.37273e+06	-1.36494e+07	-1.19502e+08	-4.41022e+07	2.51814e+07	-1.89208e+07	1.42467e+07	-8.24522e+06	6.00145e+06	1.69744e+07	-9.76352e+06	7.21088e+06	3.28863e+07	-1.82069e+07	1.46794e+07	4.99389e+07	-2.85035e+07	2.14354e+07	-1.59174e+08	-8.57852e+07	-1.02944e+08	-1.04822e+08	2.14354e+07		-1.59259e+07	7.50857e+06	8.04601e+06	1.38013e+07	-1.56179e+08	-8.42781e+07	-1.02109e+08	-1.057e+08
2085	3.44058e+06	-9.68698e+07	-1.50703e+07	-3.487e+07	-1.4337e+08	9.59135e+06	-8.2746e+07	2.68617e+06	-2.34425e+07	-9.3911e+07	0	-9.21028e+07	0	-2.00257e+07	-1.12128e+08	-7.31679e+06	-1.02709e+08	3.22136e+06	-1.51927e+07	-1.21997e+08	-4.47692e+07	2.55249e+07	-1.92444e+07	1.38823e+07	-8.01951e+06	5.86284e+06	1.61384e+07	-9.21995e+06	6.91844e+06	3.21349e+07	-1.76946e+07	1.44403e+07	5.15547e+07	-2.94616e+07	2.20931e+07	-1.62614e+08	-8.80482e+07	-1.0521e+08	-1.07556e+08	2.20931e+07		-1.61364e+07	7.40522e+06	7.80407e+06	1.35892e+07	-1.59506e+08	-8.65058e+07	-1.04324e+08	-1.08407e+08
2086	2.71838e+06	-9.83231e+07	-1.4851e+07	-3.6064e+07	-1.4652e+08	9.51532e+06	-8.34661e+07	2.52579e+06	-2.46764e+07	-9.61015e+07	0	-9.26774e+07	0	-2.14025e+07	-1.1408e+08	-7.18201e+06	-1.03296e+08	3.07579e+06	-1.67297e+07	-1.24132e+08	-4.54093e+07	2.58515e+07	-1.95577e+07	1.3104e+07	-7.52139e+06	5.58257e+06	1.53294e+07	-8.69656e+06	6.63287e+06	3.08638e+07	-1.68436e+07	1.40202e+07	5.31974e+07	-3.0435e+07	2.27624e+07	-1.66077e+08	-9.05189e+07	-1.07447e+08	-1.10111e+08	2.27624e+07		-1.63392e+07	7.17937e+06	7.56987e+06	1.32233e+07	-1.62859e+08	-8.89221e+07	-1.0651e+08	-1.10908e+08
2087	1.97021e+06	-9.97735e+07	-1.46339e+07	-3.73089e+07	-1.49746e+08	9.4204e+06	-8.41931e+07	2.71144e+06	-2.59072e+07	-9.79685e+07	0	-9.32358e+07	0	-2.2854e+07	-1.1609e+08	-7.0502e+06	-1.03832e+08	3.27628e+06	-1.83513e+07	-1.25957e+08	-4.60223e+07	2.61614e+07	-1.9861e+07	1.23526e+07	-7.04114e+06	5.31147e+06	1.45475e+07	-8.1931e+06	6.35443e+06	2.9647e+07	-1.60319e+07	1.36152e+07	5.4867e+07	-3.14236e+07	2.34434e+07	-1.69607e+08	-9.2657e+07	-1.09735e+08	-1.12342e+08	2.34434e+07		-1.65342e+07	6.96126e+06	7.3434e+06	1.2873e+07	-1.6628e+08	-9.10072e+07	-1.08746e+08	-1.13084e+08
2088	1.20336e+06	-1.01219e+08	-1.44189e+07	-3.85518e+07	-1.52987e+08	9.40595e+06	-8.48429e+07	2.87704e+06	-2.71701e+07	-9.973e+07	0	-9.37796e+07	0	-2.43015e+07	-1.18081e+08	-7.20804e+06	-1.04321e+08	3.4699e+06	-1.9967e+07	-1.28026e+08	-4.66084e+07	2.64544e+07	-2.0154e+07	1.21479e+07	-6.92542e+06	5.22245e+06	1.37927e+07	-7.70935e+06	6.08333e+06	2.89769e+07	-1.55881e+07	1.33888e+07	5.65636e+07	-3.24275e+07	2.4136e+07	-1.73141e+08	-9.45075e+07	-1.11998e+08	-1.14637e+08	2.4136e+07		-1.67214e+07	6.90448e+06	7.12468e+06	1.26839e+07	-1.69708e+08	-9.28255e+07	-1.10956e+08	-1.15342e+08
2089	524992	-1.02552e+08	-1.4206e+07	-3.97928e+07	-1.56026e+08	9.46021e+06	-8.54867e+07	2.69578e+06	-2.843e+07	-1.01761e+08	0	-9.43102e+07	0	-2.5745e+07	-1.20055e+08	-7.37269e+06	-1.04767e+08	3.31669e+06	-2.15772e+07	-1.30401e+08	-4.71675e+07	2.67306e+07	-2.04369e+07	1.17554e+07	-6.68582e+06	5.06959e+06	1.30649e+07	-7.24511e+06	5.81976e+06	2.83066e+07	-1.51477e+07	1.31589e+07	5.8287e+07	-3.34467e+07	2.48403e+07	-1.76463e+08	-9.6691e+07	-1.14235e+08	-1.17242e+08	2.48403e+07		-1.69008e+07	6.79215e+06	6.91371e+06	1.24945e+07	-1.72927e+08	-9.49685e+07	-1.13142e+08	-1.17906e+08
2090	-79106	-1.03904e+08	-1.39316e+07	-4.09805e+07	-1.58895e+08	9.69123e+06	-8.61255e+07	2.87802e+06	-2.96869e+07	-1.03243e+08	0	-9.48287e+07	0	-2.71848e+07	-1.22014e+08	-7.25735e+06	-1.05174e+08	3.51388e+06	-2.31823e+07	-1.321e+08	-4.76997e+07	2.69901e+07	-2.07096e+07	1.08705e+07	-6.1183e+06	4.75215e+06	1.23641e+07	-6.80022e+06	5.56389e+06	2.71438e+07	-1.43813e+07	1.27624e+07	6.00374e+07	-3.44811e+07	2.55563e+07	-1.79604e+08	-9.84911e+07	-1.1645e+08	-1.19337e+08	2.55563e+07		-1.70724e+07	6.5341e+06	6.71051e+06	1.21594e+07	-1.75967e+08	-9.67091e+07	-1.15303e+08	-1.19941e+08
2091	-751352	-1.05172e+08	-1.36592e+07	-4.21664e+07	-1.61749e+08	9.89514e+06	-8.67602e+07	3.06105e+06	-3.09411e+07	-1.04745e+08	0	-9.53363e+07	0	-2.8621e+07	-1.23957e+08	-7.44199e+06	-1.05544e+08	3.70491e+06	-2.47824e+07	-1.34064e+08	-4.7757e+07	2.69362e+07	-2.08208e+07	1.06105e+07	-5.96613e+06	4.64438e+06	1.16904e+07	-6.37453e+06	5.31584e+06	2.65548e+07	-1.39972e+07	1.25577e+07	6.18147e+07	-3.55307e+07	2.6284e+07	-1.8257e+08	-1.00101e+08	-1.18641e+08	-1.21506e+08	2.6284e+07		-1.71038e+07	6.46054e+06	6.51508e+06	1.19934e+07	-1.78853e+08	-9.82846e+07	-1.17442e+08	-1.22071e+08
2092	-1.36332e+06	-1.05172e+08	-1.46669e+07	-4.46486e+07	-1.65851e+08	1.01094e+07	-8.73911e+07	2.89773e+06	-3.21925e+07	-1.06577e+08	0	-9.58337e+07	0	-3.00536e+07	-1.25887e+08	-7.63044e+06	-1.05881e+08	3.54965e+06	-2.63779e+07	-1.3634e+08	-4.77874e+07	2.68669e+07	-2.09205e+07	1.03776e+07	-5.83414e+06	4.54343e+06	1.10437e+07	-5.96792e+06	5.07575e+06	2.59656e+07	-1.36161e+07	1.23495e+07	6.3619e+07	-3.65956e+07	2.70234e+07	-1.86771e+08	-1.02033e+08	-1.20812e+08	-1.2399e+08	2.70234e+07		-1.71272e+07	6.39488e+06	6.32742e+06	1.18273e+07	-1.82978e+08	-1.00182e+08	-1.1956e+08	-1.24513e+08
2093	-911179	-1.05074e+08	-1.56707e+07	-4.71236e+07	-1.68779e+08	1.00828e+07	-8.80937e+07	2.74109e+06	-3.34412e+07	-1.08711e+08	0	-9.63133e+07	0	-3.14867e+07	-1.278e+08	-7.53541e+06	-1.06262e+08	3.40113e+06	-2.79377e+07	-1.38334e+08	-5.16799e+07	2.93608e+07	-2.23191e+07	9.65216e+06	-5.37449e+06	4.27767e+06	1.0424e+07	-5.58026e+06	4.84373e+06	2.4884e+07	-1.29088e+07	1.19753e+07	6.54501e+07	-3.76757e+07	2.77745e+07	-1.91098e+08	-1.04433e+08	-1.22956e+08	-1.26359e+08	2.77745e+07		-1.82924e+07	6.18355e+06	6.14755e+06	1.15154e+07	-1.87072e+08	-1.02527e+08	-1.21652e+08	-1.26819e+08
2094	-387757	-1.049e+08	-1.6661e+07	-4.95813e+07	-1.7153e+08	1.00117e+07	-8.88038e+07	2.93113e+06	-3.46873e+07	-1.10548e+08	0	-9.67834e+07	0	-3.29164e+07	-1.297e+08	-7.4392e+06	-1.06626e+08	3.59236e+06	-2.94933e+07	-1.39966e+08	-5.55453e+07	3.18298e+07	-2.37155e+07	9.10261e+06	-5.03167e+06	4.07094e+06	9.81669e+06	-5.20158e+06	4.61511e+06	2.39783e+07	-1.23198e+07	1.16586e+07	6.73082e+07	-3.8771e+07	2.85373e+07	-1.95245e+08	-1.06477e+08	-1.25085e+08	-1.28308e+08	2.85373e+07		-1.94508e+07	6.02399e+06	5.97115e+06	1.12551e+07	-1.90981e+08	-1.04524e+08	-1.23729e+08	-1.28711e+08
2095	188367	-1.04671e+08	-1.76404e+07	-5.20246e+07	-1.74148e+08	9.9155e+06	-8.95195e+07	2.77773e+06	-3.59309e+07	-1.12757e+08	0	-9.72445e+07	0	-3.43429e+07	-1.31587e+08	-7.61138e+06	-1.06974e+08	3.44022e+06	-3.10447e+07	-1.4219e+08	-5.93836e+07	3.42537e+07	-2.51299e+07	9.0995e+06	-5.05354e+06	4.04595e+06	9.23641e+06	-4.84169e+06	4.39472e+06	2.35918e+07	-1.20788e+07	1.15131e+07	6.91932e+07	-3.98814e+07	2.93118e+07	-1.99277e+08	-1.08711e+08	-1.27193e+08	-1.30677e+08	2.93118e+07		-2.06024e+07	6.02581e+06	5.80254e+06	1.11481e+07	-1.9475e+08	-1.06731e+08	-1.25785e+08	-1.31042e+08
2096	800959	-1.04404e+08	-1.8611e+07	-5.44556e+07	-1.7667e+08	9.79678e+06	-9.02439e+07	2.62349e+06	-3.71721e+07	-1.14996e+08	0	-9.76972e+07	0	-3.57662e+07	-1.33463e+08	-7.50259e+06	-1.07306e+08	3.29427e+06	-3.25922e+07	-1.44106e+08	-6.31947e+07	3.66376e+07	-2.65571e+07	8.60395e+06	-4.74911e+06	3.85484e+06	8.68314e+06	-4.50057e+06	4.18257e+06	2.27129e+07	-1.15129e+07	1.12e+07	7.11052e+07	-4.10071e+07	3.0098e+07	-2.03227e+08	-1.11141e+08	-1.29281e+08	-1.32906e+08	3.0098e+07		-2.17471e+07	5.88204e+06	5.64174e+06	1.08953e+07	-1.98417e+08	-1.09114e+08	-1.27822e+08	-1.33211e+08
2097	1.43567e+06	-1.04116e+08	-1.95743e+07	-5.68761e+07	-1.79131e+08	9.65863e+06	-9.09675e+07	2.81552e+06	-3.84108e+07	-1.16904e+08	0	-9.8142e+07	0	-3.71865e+07	-1.35328e+08	-7.39462e+06	-1.07623e+08	3.48766e+06	-3.41357e+07	-1.45666e+08	-6.69787e+07	3.89855e+07	-2.79932e+07	8.13541e+06	-4.46106e+06	3.67434e+06	8.15688e+06	-4.17811e+06	3.97877e+06	2.18883e+07	-1.0983e+07	1.09053e+07	7.3044e+07	-4.2148e+07	3.0896e+07	-2.07124e+08	-1.1323e+08	-1.3135e+08	-1.34761e+08	3.0896e+07		-2.2885e+07	5.74609e+06	5.48875e+06	1.06583e+07	-2.02016e+08	-1.11158e+08	-1.2984e+08	-1.35008e+08
2098	2.15695e+06	-1.03739e+08	-2.05315e+07	-5.92873e+07	-1.81401e+08	9.60058e+06	-9.16887e+07	2.98079e+06	-3.96472e+07	-1.18755e+08	0	-9.85793e+07	0	-3.86037e+07	-1.37183e+08	-7.55757e+06	-1.07844e+08	3.68146e+06	-3.57106e+07	-1.47431e+08	-7.07356e+07	4.13006e+07	-2.9435e+07	8.21326e+06	-4.5366e+06	3.67666e+06	7.65762e+06	-3.87421e+06	3.78342e+06	2.15829e+07	-1.08e+07	1.07829e+07	7.50098e+07	-4.33041e+07	3.17057e+07	-2.10836e+08	-1.15078e+08	-1.334e+08	-1.36648e+08	3.17057e+07		-2.4016e+07	5.77156e+06	5.34358e+06	1.05746e+07	-2.05417e+08	-1.12983e+08	-1.31839e+08	-1.36856e+08
2099	2.95534e+06	-1.03283e+08	-2.14837e+07	-6.16904e+07	-1.83502e+08	9.62684e+06	-9.24061e+07	2.7994e+06	-4.08813e+07	-1.20861e+08	0	-9.90095e+07	0	-4.0018e+07	-1.39027e+08	-7.73976e+06	-1.0804e+08	3.53563e+06	-3.72818e+07	-1.49526e+08	-7.44653e+07	4.35851e+07	-3.08802e+07	8.21239e+06	-4.55978e+06	3.65261e+06	7.18537e+06	-3.58877e+06	3.5966e+06	2.11683e+07	-1.05455e+07	1.06228e+07	7.70025e+07	-4.44754e+07	3.25271e+07	-2.14382e+08	-1.17209e+08	-1.35431e+08	-1.38903e+08	3.25271e+07		-2.51401e+07	5.77377e+06	5.20624e+06	1.04585e+07	-2.08642e+08	-1.15087e+08	-1.33821e+08	-1.39067e+08
2100	3.8223e+06	-1.02758e+08	-2.24317e+07	-6.40862e+07	-1.85453e+08	9.83283e+06	-9.31186e+07	2.98159e+06	-4.21133e+07	-1.22417e+08	0	-9.94327e+07	0	-4.14295e+07	-1.40862e+08	-7.6573e+06	-1.08214e+08	3.72628e+06	-3.88494e+07	-1.50994e+08	-7.8168e+07	4.58411e+07	-3.23268e+07	7.71914e+06	-4.25393e+06	3.46521e+06	6.74012e+06	-3.3217e+06	3.41842e+06	2.02885e+07	-9.98145e+06	1.03071e+07	7.90221e+07	-4.56619e+07	3.33602e+07	-2.1778e+08	-1.18952e+08	-1.37444e+08	-1.40687e+08	3.33602e+07		-2.62573e+07	5.63039e+06	5.07674e+06	1.02047e+07	-2.11711e+08	-1.16787e+08	-1.35785e+08	-1.4079e+08
2101	4.75013e+06	-1.02171e+08	-2.33758e+07	-6.64753e+07	-1.87272e+08	1.00145e+07	-9.38254e+07	3.16469e+06	-4.33431e+07	-1.23989e+08	0	-9.98539e+07	0	-4.28382e+07	-1.42692e+08	-7.84237e+06	-1.08369e+08	3.91791e+06	-4.04134e+07	-1.52707e+08	-8.18435e+07	4.80701e+07	-3.37734e+07	7.85068e+06	-4.36167e+06	3.48902e+06	6.32186e+06	-3.07291e+06	3.24895e+06	1.99279e+07	-9.76245e+06	1.01655e+07	8.10686e+07	-4.68636e+07	3.42051e+07	-2.21046e+08	-1.205e+08	-1.39443e+08	-1.42541e+08	3.42051e+07		-2.73677e+07	5.6716e+06	4.95508e+06	1.01042e+07	-2.1464e+08	-1.18318e+08	-1.37737e+08	-1.42603e+08
2102	5.73189e+06	-1.01532e+08	-2.43167e+07	-6.88582e+07	-1.88975e+08	1.02101e+07	-9.45177e+07	3.00157e+06	-4.32147e+07	-1.24521e+08	0	-1.00261e+08	0	-4.42442e+07	-1.44505e+08	-8.04384e+06	-1.08503e+08	3.77036e+06	-4.19741e+07	-1.5475e+08	-8.54919e+07	5.02731e+07	-3.52188e+07	8.0092e+06	-4.48812e+06	3.52108e+06	5.9306e+06	-2.84232e+06	3.08828e+06	1.95943e+07	-9.56373e+06	1.00306e+07	8.31421e+07	-4.80804e+07	3.50617e+07	-2.24194e+08	-1.21e+08	-1.41417e+08	-1.44719e+08	3.50617e+07		-2.84711e+07	5.72083e+06	4.84128e+06	1.00115e+07	-2.17446e+08	-1.188e+08	-1.39664e+08	-1.44739e+08
2103	6.75771e+06	-1.00849e+08	-2.52547e+07	-7.12355e+07	-1.90581e+08	1.01667e+07	-9.52029e+07	2.84509e+06	-4.30901e+07	-1.25281e+08	0	-1.00662e+08	0	-4.56475e+07	-1.46309e+08	-7.97819e+06	-1.08624e+08	3.61554e+06	-4.35314e+07	-1.56518e+08	-8.91133e+07	5.24512e+07	-3.66621e+07	7.67535e+06	-4.28558e+06	3.38977e+06	5.56633e+06	-2.62984e+06	2.93649e+06	1.87956e+07	-9.05615e+06	9.73945e+06	8.52425e+07	-4.93125e+07	3.593e+07	-2.27243e+08	-1.21891e+08	-1.43373e+08	-1.46779e+08	3.593e+07	1.81571e+08	-2.95677e+07	5.62451e+06	4.73534e+06	9.78117e+06	-2.20149e+08	-1.19657e+08	-1.41574e+08	-1.46737e+08
2104	7.82187e+06	-1.00128e+08	-2.61901e+07	-7.36075e+07	-1.92104e+08	1.00812e+07	-9.58809e+07	3.03539e+06	-4.298e+07	-1.25744e+08	0	-1.01056e+08	0	-4.70483e+07	-1.48104e+08	-7.87749e+06	-1.08736e+08	3.80755e+06	-4.50854e+07	-1.57892e+08	-9.27076e+07	5.46052e+07	-3.81024e+07	7.39573e+06	-4.11799e+06	3.27773e+06	5.22904e+06	-2.4354e+06	2.79364e+06	1.79967e+07	-8.54925e+06	9.44742e+06	8.73698e+07	-5.05598e+07	3.68101e+07	-2.30207e+08	-1.22467e+08	-1.45311e+08	-1.48444e+08	3.68101e+07	1.80058e+08	-3.06573e+07	5.54412e+06	4.63726e+06	9.55055e+06	-2.22762e+08	-1.202e+08	-1.43467e+08	-1.48341e+08
2105	8.91921e+06	-9.93766e+07	-2.71231e+07	-7.59745e+07	-1.93555e+08	9.97207e+06	-9.65521e+07	2.88232e+06	-4.28815e+07	-1.26579e+08	0	-1.01445e+08	0	-4.84467e+07	-1.49891e+08	-8.05783e+06	-1.08841e+08	3.66325e+06	-4.66363e+07	-1.59872e+08	-9.62748e+07	5.67356e+07	-3.95392e+07	7.66239e+06	-4.3143e+06	3.34809e+06	4.91874e+06	-2.25893e+06	2.65982e+06	1.77441e+07	-8.40795e+06	9.3361e+06	8.9524e+07	-5.18222e+07	3.77018e+07	-2.33094e+08	-1.23231e+08	-1.47232e+08	-1.50535e+08	3.77018e+07	1.78519e+08	-3.17401e+07	5.6252e+06	4.54706e+06	9.48123e+06	-2.25295e+08	-1.20954e+08	-1.45344e+08	-1.5039e+08
2106	1.00451e+07	-9.8598e+07	-2.80538e+07	-7.83368e+07	-1.94944e+08	9.84166e+06	-9.72163e+07	2.72835e+06	-4.27925e+07	-1.27439e+08	0	-1.01828e+08	0	-4.98426e+07	-1.51671e+08	-7.97364e+06	-1.08943e+08	3.51111e+06	-4.81841e+07	-1.6159e+08	-9.98149e+07	5.8843e+07	-4.09719e+07	7.43673e+06	-4.1842e+06	3.25253e+06	4.63543e+06	-2.10034e+06	2.53509e+06	1.70264e+07	-7.96021e+06	9.06617e+06	9.17052e+07	-5.30998e+07	3.86053e+07	-2.35915e+08	-1.24186e+08	-1.49136e+08	-1.52523e+08	3.86053e+07	1.76954e+08	-3.28158e+07	5.56075e+06	4.46475e+06	9.2743e+06	-2.27759e+08	-1.21878e+08	-1.47206e+08	-1.52315e+08
2107	1.11953e+07	-9.89597e+07	-2.77051e+07	-7.94239e+07	-1.94893e+08	9.69196e+06	-9.78684e+07	2.92071e+06	-4.27113e+07	-1.27967e+08	0	-1.02202e+08	0	-5.12363e+07	-1.53439e+08	-7.85653e+06	-1.09037e+08	3.70537e+06	-4.97289e+07	-1.62917e+08	-1.03328e+08	6.09278e+07	-4.24002e+07	7.23804e+06	-4.07015e+06	3.16789e+06	4.37909e+06	-1.95956e+06	2.41953e+06	1.63085e+07	-7.51216e+06	8.7963e+06	9.39133e+07	-5.43927e+07	3.95206e+07	-2.37294e+08	-1.24799e+08	-1.51019e+08	-1.5412e+08	3.95206e+07	1.75362e+08	-3.38847e+07	5.50422e+06	4.39033e+06	9.06708e+06	-2.28778e+08	-1.22463e+08	-1.49048e+08	-1.5385e+08
2108	1.12137e+07	-9.95806e+07	-2.736e+07	-8.05121e+07	-1.96239e+08	9.62316e+06	-9.8512e+07	3.08635e+06	-4.26366e+07	-1.28439e+08	0	-1.02572e+08	0	-5.26276e+07	-1.55199e+08	-8.02224e+06	-1.09126e+08	3.90707e+06	-5.12707e+07	-1.64512e+08	-1.02969e+08	6.04423e+07	-4.25264e+07	7.5856e+06	-4.31938e+06	3.26622e+06	4.14974e+06	-1.83652e+06	2.31322e+06	1.61368e+07	-7.42892e+06	8.7079e+06	9.61483e+07	-5.57007e+07	4.04475e+07	-2.38765e+08	-1.25173e+08	-1.52886e+08	-1.55804e+08	4.04475e+07	1.73742e+08	-3.38093e+07	5.60918e+06	4.32381e+06	9.0212e+06	-2.30048e+08	-1.2283e+08	-1.50875e+08	-1.5549e+08
2109	1.09849e+07	-1.00431e+08	-2.70284e+07	-8.16116e+07	-1.98086e+08	9.63945e+06	-9.91472e+07	2.90531e+06	-4.25674e+07	-1.2917e+08	0	-1.02936e+08	0	-5.40168e+07	-1.56953e+08	-8.22466e+06	-1.09211e+08	3.76212e+06	-5.28098e+07	-1.66483e+08	-1.02582e+08	5.99459e+07	-4.26365e+07	7.85445e+06	-4.5159e+06	3.33856e+06	3.94736e+06	-1.73115e+06	2.21621e+06	1.60194e+07	-7.38266e+06	8.63675e+06	9.84102e+07	-5.7024e+07	4.13862e+07	-2.40723e+08	-1.25831e+08	-1.54737e+08	-1.57847e+08	4.13862e+07	1.72096e+08	-3.37259e+07	5.69096e+06	4.2652e+06	8.9913e+06	-2.31812e+08	-1.23479e+08	-1.52688e+08	-1.57492e+08
2110	1.05412e+07	-1.01342e+08	-2.67714e+07	-8.27842e+07	-2.00357e+08	9.83654e+06	-9.9774e+07	3.08784e+06	-4.25031e+07	-1.29353e+08	0	-1.03296e+08	0	-5.54039e+07	-1.587e+08	-8.14571e+06	-1.09293e+08	3.95365e+06	-5.43461e+07	-1.67831e+08	-1.02169e+08	5.94587e+07	-4.27106e+07	7.63101e+06	-4.38287e+06	3.24814e+06	3.77196e+06	-1.64338e+06	2.12858e+06	1.54097e+07	-7.00802e+06	8.40169e+06	1.00699e+08	-5.83624e+07	4.23366e+07	-2.43067e+08	-1.26105e+08	-1.56571e+08	-1.59429e+08	4.23366e+07	1.70421e+08	-3.36344e+07	5.62722e+06	4.2145e+06	8.81576e+06	-2.33991e+08	-1.23726e+08	-1.54486e+08	-1.59015e+08
2111	1.00411e+07	-1.02428e+08	-2.65233e+07	-8.39634e+07	-2.02874e+08	1.00104e+07	-1.00393e+08	3.27134e+06	-4.2443e+07	-1.29554e+08	0	-1.03652e+08	0	-5.67889e+07	-1.60441e+08	-8.33218e+06	-1.09372e+08	4.1532e+06	-5.58797e+07	-1.6943e+08	-1.02228e+08	5.93059e+07	-4.2922e+07	8.03222e+06	-4.66294e+06	3.36928e+06	3.62353e+06	-1.57314e+06	2.05039e+06	1.5319e+07	-6.97686e+06	8.34216e+06	1.03015e+08	-5.97161e+07	4.32987e+07	-2.45796e+08	-1.26185e+08	-1.5839e+08	-1.61088e+08	4.32987e+07	1.68719e+08	-3.36823e+07	5.74817e+06	4.17172e+06	8.79355e+06	-2.36556e+08	-1.23806e+08	-1.56269e+08	-1.60637e+08
2112	9.36971e+06	-1.03519e+08	-2.62826e+07	-8.51479e+07	-2.0558e+08	1.01992e+07	-9.97584e+07	3.10856e+06	-4.37752e+07	-1.30226e+08	0	-1.03998e+08	0	-5.81719e+07	-1.6217e+08	-8.55245e+06	-1.09444e+08	4.00654e+06	-5.74108e+07	-1.71401e+08	-1.0226e+08	5.91518e+07	-4.31079e+07	8.46038e+06	-4.96126e+06	3.49912e+06	3.50207e+06	-1.52036e+06	1.98171e+06	1.52825e+07	-6.98283e+06	8.2997e+06	1.05357e+08	-6.1085e+07	4.42725e+07	-2.48688e+08	-1.26727e+08	-1.60188e+08	-1.63101e+08	4.42725e+07	1.66989e+08	-3.37222e+07	5.87721e+06	4.13688e+06	8.78733e+06	-2.39302e+08	-1.24349e+08	-1.58033e+08	-1.62613e+08
2113	8.68873e+06	-1.04602e+08	-2.60482e+07	-8.63367e+07	-2.08298e+08	1.02499e+07	-9.89535e+07	2.95243e+06	-4.51049e+07	-1.30856e+08	0	-1.0434e+08	0	-5.95531e+07	-1.63893e+08	-8.48891e+06	-1.09516e+08	3.8526e+06	-5.89393e+07	-1.73091e+08	-1.02264e+08	5.89907e+07	-4.32738e+07	6.30095e+06	-3.54141e+06	2.75954e+06	3.40758e+06	-1.48497e+06	1.92261e+06	1.47538e+07	-6.66064e+06	8.09315e+06	1.07727e+08	-6.24691e+07	4.5258e+07	-2.51572e+08	-1.28097e+08	-1.6197e+08	-1.64998e+08	4.5258e+07	1.68397e+08	-3.37542e+07	5.24102e+06	4.10998e+06	8.63551e+06	-2.42052e+08	-1.25615e+08	-1.59783e+08	-1.64456e+08
2114	8.00955e+06	-1.05666e+08	-2.58191e+07	-8.75288e+07	-2.11004e+08	1.02852e+07	-9.79966e+07	3.14308e+06	-4.6421e+07	-1.30989e+08	0	-1.04678e+08	0	-6.09324e+07	-1.6561e+08	-8.38791e+06	-1.09587e+08	4.04551e+06	-6.04654e+07	-1.74395e+08	-1.02242e+08	5.88213e+07	-4.3421e+07	4.1958e+06	-2.16198e+06	2.03382e+06	3.34006e+06	-1.46691e+06	1.87315e+06	1.42248e+07	-6.33795e+06	7.88686e+06	1.10124e+08	-6.38684e+07	4.62552e+07	-2.54425e+08	-1.28955e+08	-1.63737e+08	-1.66508e+08	4.62552e+07	1.6661e+08	-3.37781e+07	4.62024e+06	4.09103e+06	8.48345e+06	-2.44782e+08	-1.26369e+08	-1.61519e+08	-1.65911e+08
2115	7.34245e+06	-1.06701e+08	-2.55945e+07	-8.87235e+07	-2.13677e+08	1.0469e+07	-9.69034e+07	2.99035e+06	-4.77262e+07	-1.3117e+08	0	-1.05012e+08	0	-6.23099e+07	-1.67322e+08	-8.56868e+06	-1.09658e+08	3.9021e+06	-6.19891e+07	-1.76314e+08	-1.02193e+08	5.86421e+07	-4.35511e+07	2.63689e+06	-1.16267e+06	1.47422e+06	3.29951e+06	-1.46612e+06	1.83339e+06	1.4242e+07	-6.37995e+06	7.86208e+06	1.12547e+08	-6.5283e+07	4.7264e+07	-2.57228e+08	-1.29696e+08	-1.65489e+08	-1.68452e+08	4.7264e+07	1.64794e+08	-3.37941e+07	4.16038e+06	4.08003e+06	8.49278e+06	-2.47471e+08	-1.2701e+08	-1.63242e+08	-1.67821e+08
2116	6.6967e+06	-1.07699e+08	-2.53739e+07	-8.99205e+07	-2.16297e+08	1.06607e+07	-9.5688e+07	2.83671e+06	-4.90227e+07	-1.31213e+08	0	-1.05343e+08	0	-6.36858e+07	-1.69029e+08	-8.48263e+06	-1.0973e+08	3.75085e+06	-6.35106e+07	-1.77972e+08	-1.02117e+08	5.84523e+07	-4.36649e+07	585801	149771	735572	3.28592e+06	-1.48252e+06	1.8034e+06	1.37942e+07	-6.1146e+06	7.67964e+06	1.14997e+08	-6.67128e+07	4.82846e+07	-2.59962e+08	-1.30478e+08	-1.67226e+08	-1.70293e+08	4.82846e+07	1.6295e+08	-3.38021e+07	3.55447e+06	4.07699e+06	8.36458e+06	-2.50099e+08	-1.27659e+08	-1.64952e+08	-1.69608e+08
2117	6.0807e+06	-1.08732e+08	-2.5157e+07	-9.11193e+07	-2.18927e+08	1.08591e+07	-9.55808e+07	3.0294e+06	-5.03121e+07	-1.32004e+08	0	-1.05664e+08	0	-6.506e+07	-1.70724e+08	-8.36172e+06	-1.09796e+08	3.946e+06	-6.50299e+07	-1.79242e+08	-1.02014e+08	5.82509e+07	-4.37634e+07	-1.43826e+06	1.43517e+06	-3089.87	3.2993e+06	-1.51607e+06	1.78323e+06	1.33462e+07	-5.8481e+06	7.4981e+06	1.17475e+08	-6.81579e+07	4.93168e+07	-2.62691e+08	-1.32007e+08	-1.68941e+08	-1.71744e+08	4.93168e+07	1.61075e+08	-3.38021e+07	2.95593e+06	4.08193e+06	8.23617e+06	-2.52729e+08	-1.29048e+08	-1.66642e+08	-1.71006e+08
2118	5.42479e+06	-1.09794e+08	-2.49433e+07	-9.23197e+07	-2.21632e+08	1.08133e+07	-9.55412e+07	3.19538e+06	-5.15956e+07	-1.33128e+08	0	-1.05982e+08	0	-6.64327e+07	-1.72414e+08	-8.52387e+06	-1.09864e+08	4.14859e+06	-6.6547e+07	-1.80787e+08	-1.01884e+08	5.80376e+07	-4.38468e+07	-869960	991921	121961	3.33964e+06	-1.56668e+06	1.77295e+06	1.34443e+07	-5.94558e+06	7.49874e+06	1.19979e+08	-6.96182e+07	5.03607e+07	-2.65479e+08	-1.33006e+08	-1.70642e+08	-1.73288e+08	5.03607e+07	1.59171e+08	-3.37942e+07	3.12361e+06	4.09485e+06	8.26917e+06	-2.55426e+08	-1.30004e+08	-1.6832e+08	-1.72518e+08
2119	4.73387e+06	-1.10881e+08	-2.47326e+07	-9.35215e+07	-2.24402e+08	1.08147e+07	-9.55609e+07	3.01466e+06	-5.28743e+07	-1.34606e+08	0	-1.06296e+08	0	-6.78039e+07	-1.741e+08	-8.7222e+06	-1.09934e+08	4.00452e+06	-6.80621e+07	-1.82714e+08	-1.01728e+08	5.7812e+07	-4.39157e+07	-380368	599380	219012	3.40693e+06	-1.63431e+06	1.77263e+06	1.35966e+07	-6.07924e+06	7.5174e+06	1.2251e+08	-7.10938e+07	5.14162e+07	-2.68317e+08	-1.34387e+08	-1.72327e+08	-1.75197e+08	5.14162e+07	1.57238e+08	-3.37781e+07	3.26818e+06	4.11575e+06	8.31823e+06	-2.5818e+08	-1.31338e+08	-1.69984e+08	-1.74396e+08
2120	4.01242e+06	-1.11989e+08	-2.45247e+07	-9.47246e+07	-2.27226e+08	1.08137e+07	-9.56334e+07	3.19751e+06	-5.41489e+07	-1.35771e+08	0	-1.06607e+08	0	-6.91736e+07	-1.75781e+08	-8.63759e+06	-1.10006e+08	4.19694e+06	-6.95752e+07	-1.84022e+08	-1.01544e+08	5.75736e+07	-4.39704e+07	-382996	545930	162933	3.50119e+06	-1.71889e+06	1.78231e+06	1.32568e+07	-5.88374e+06	7.37301e+06	1.25068e+08	-7.25847e+07	5.24834e+07	-2.71197e+08	-1.35608e+08	-1.73998e+08	-1.76649e+08	5.24834e+07	1.55274e+08	-3.37541e+07	3.26728e+06	4.14465e+06	8.22174e+06	-2.6098e+08	-1.32504e+08	-1.71636e+08	-1.758e+08
2121	3.2645e+06	-1.13114e+08	-2.43085e+07	-9.59289e+07	-2.30087e+08	1.07502e+07	-9.57534e+07	3.28834e+06	-5.45842e+07	-1.36299e+08	0	-1.06915e+08	0	-7.0542e+07	-1.77457e+08	-8.81898e+06	-1.10079e+08	4.2898e+06	-7.10865e+07	-1.85695e+08	-1.01333e+08	5.72074e+07	-4.4126e+07	238913	276250	515163	3.62241e+06	-1.77714e+06	1.84527e+06	1.34358e+07	-5.95286e+06	7.48291e+06	1.27653e+08	-7.30801e+07	5.4573e+07	-2.74213e+08	-1.35784e+08	-1.75612e+08	-1.78212e+08	5.4573e+07	1.53279e+08	-3.37541e+07	3.26728e+06	4.14465e+06	8.22174e+06	-2.63841e+08	-1.33032e+08	-1.73312e+08	-1.77473e+08
2122	2.49378e+06	-1.14248e+08	-2.4095e+07	-9.71344e+07	-2.32983e+08	1.06665e+07	-9.59165e+07	3.19107e+06	-5.50125e+07	-1.37071e+08	0	-1.07198e+08	0	-7.19361e+07	-1.79134e+08	-9.03388e+06	-1.10149e+08	4.1945e+06	-7.25959e+07	-1.87584e+08	-1.01096e+08	5.68367e+07	-4.42591e+07	887764	3598.14	891362	3.77059e+06	-1.84377e+06	1.92681e+06	1.3669e+07	-6.04149e+06	7.62748e+06	1.30265e+08	-7.3578e+07	5.6687e+07	-2.77243e+08	-1.3618e+08	-1.77207e+08	-1.79957e+08	5.6687e+07	1.51254e+08	-3.37541e+07	3.26728e+06	4.14465e+06	8.22174e+06	-2.66738e+08	-1.33804e+08	-1.74989e+08	-1.79362e+08
	Marginal domestic supply impact (HWP - existing forest + Aff_lo + BL)																				Marginal import impact - demand for IRW met															Net impact						Increased use of concrete - demand for IRW not met				Net impact (with increased use of concrete)
	50_35 + Aff35_lo					50_45 + Aff45_lo					50_50 + Aff50_lo					50_55 + Aff55_lo					50_35 + Aff35_lo			50_45 + Aff45_lo			50_50 + Aff50_lo			50_55 + Aff55_lo			Reference			50_35 + Aff35_lo	50_45 + Aff45_lo	50_50 + Aff50_lo	50_55 + Aff55_lo	Reference		50_35 + Aff35_lo	50_45 + Aff45_lo	50_50 + Aff50_lo	50_55 + Aff55_lo	50_35 + Aff35_hi	50_45 + Aff45_hi	50_50 + Aff50_hi	50_55 + Aff55_hi
	Ecosystem C		HWP		Total	Ecosystem C		HWP		Total	Ecosystem C		HWP		Total	Ecosystem C		HWP		Total	Ecosystem C	HWP	Total	Ecosystem C	HWP	Total	Ecosystem C	HWP	Total	Ecosystem C	HWP	Total	Ecosystem C	HWP	Total
	Existing forest	New forest	Existing forest	New forest		Existing forest	New forest	Existing forest	New forest		Existing forest	New forest	Existing forest	New forest		Existing forest	New forest	Existing forest	New forest
2023	0	-597398	0	0	-597398	267411	-595531	303742	0	-24378.2	0	-595531	0	0	-595531	0	-595531	303742	0	-291789	0	0	0	0	0	0	-6.05686e-11	0	-6.05686e-11	-4.13283e-10	2.69843e-10	-1.4344e-10	As above			-597398	-24378.2	-595531	-291789	As above		0	0	0	-1.76023e-10	-597398	-24378.2	-595531	-291789
2024	-6736.99	-1.20374e+06	0	0	-1.21047e+06	556483	-1.19539e+06	298641	0	-340260	0	-1.19539e+06	0	0	-1.19539e+06	-273429	-1.19539e+06	298641	0	-1.17017e+06	28893.4	-17577.2	11316.2	528183	-321319	206864	28893.4	-17577.2	11316.2	528183	-321319	206864				-1.19916e+06	-133396	-1.18407e+06	-963309			11465.9	209601	11465.9	209601	-1.19901e+06	-130659	-1.18392e+06	-960572
2025	-23742.5	-1.82392e+06	0	0	-1.84766e+06	862466	-1.80221e+06	291102	0	-648645	0	-1.80221e+06	0	0	-1.80221e+06	-301540	-1.80221e+06	291102	0	-1.81265e+06	84707.5	-52850.3	31857.2	561149	-351492	209657	84707.5	-52850.3	31857.2	561149	-351492	209657				-1.81581e+06	-438988	-1.77036e+06	-1.60299e+06			34641.1	232318	34641.1	232318	-1.81302e+06	-416327	-1.76757e+06	-1.58033e+06
2026	-54067	-2.46247e+06	0	0	-2.51654e+06	1.18129e+06	-2.41861e+06	595115	0	-642210	0	-2.41861e+06	0	0	-2.41861e+06	-325277	-2.41861e+06	595115	0	-2.14877e+06	167442	-105799	61642.9	626984	-396901	230083	167442	-105799	61642.9	626984	-396901	230083				-2.4549e+06	-412127	-2.35697e+06	-1.91869e+06			69768.9	266889	69768.9	266889	-2.44677e+06	-375321	-2.34884e+06	-1.88188e+06
2027	-100329	-3.1236e+06	0	0	-3.22393e+06	1.50977e+06	-3.04715e+06	584932	0	-952442	0	-3.04715e+06	0	0	-3.04715e+06	-623235	-3.04715e+06	584932	0	-3.08545e+06	277098	-176443	100655	1.21223e+06	-771558	440669	277098	-176443	100655	1.21223e+06	-771558	440669				-3.12328e+06	-511773	-2.94649e+06	-2.64478e+06			117093	516356	117093	516356	-3.10684e+06	-436086	-2.93005e+06	-2.56909e+06
2028	-164733	-3.81124e+06	0	0	-3.97597e+06	1.60724e+06	-3.69036e+06	569096	0	-1.51403e+06	0	-3.69036e+06	0	0	-3.69036e+06	-668048	-3.69036e+06	569096	0	-3.78931e+06	413674	-263183	150492	1.32389e+06	-844495	479394	413674	-263183	150492	1.32389e+06	-844495	479394				-3.82548e+06	-1.03463e+06	-3.53987e+06	-3.30992e+06			175211	570555	175211	570555	-3.80076e+06	-943473	-3.51515e+06	-3.21876e+06
2029	-249084	-4.52901e+06	0	0	-4.77809e+06	1.68858e+06	-4.35076e+06	869109	0	-1.79307e+06	0	-4.35076e+06	0	0	-4.35076e+06	-705614	-4.35076e+06	869109	0	-4.18726e+06	577171	-367076	210096	1.46388e+06	-932552	531326	577171	-367076	210096	1.46388e+06	-932552	531326				-4.568e+06	-1.26174e+06	-4.14066e+06	-3.65593e+06			245354	636679	245354	636679	-4.53274e+06	-1.15639e+06	-4.1054e+06	-3.55058e+06
2030	-354807	-5.28028e+06	0	0	-5.63508e+06	1.75575e+06	-5.03081e+06	849121	0	-2.42593e+06	0	-5.03081e+06	0	0	-5.03081e+06	-1.01981e+06	-5.03081e+06	849121	0	-5.20149e+06	767589	-487320	280269	2.12575e+06	-1.35103e+06	774713	767589	-487320	280269	2.12575e+06	-1.35103e+06	774713				-5.35481e+06	-1.65122e+06	-4.75054e+06	-4.42678e+06			325324	911675	325324	911675	-5.30976e+06	-1.51426e+06	-4.70548e+06	-4.28982e+06
2031	-482969	-6.06813e+06	0	0	-6.5511e+06	1.81033e+06	-5.73294e+06	827254	0	-3.09536e+06	0	-5.73294e+06	0	0	-5.73294e+06	-1.07394e+06	-5.73294e+06	827254	0	-5.97963e+06	984927	-624545	360383	2.31088e+06	-1.46827e+06	842613	984927	-624545	360383	2.31088e+06	-1.46827e+06	842613				-6.19072e+06	-2.25274e+06	-5.37256e+06	-5.13702e+06			417207	997689	417207	997689	-6.13389e+06	-2.09767e+06	-5.31573e+06	-4.98194e+06
2032	-634319	-6.89541e+06	0	0	-7.52973e+06	1.85358e+06	-6.45952e+06	1.12564e+06	0	-3.4803e+06	0	-6.45952e+06	0	0	-6.45952e+06	-1.1187e+06	-6.45952e+06	1.12564e+06	0	-6.45258e+06	1.22919e+06	-778745	450441	2.52358e+06	-1.6006e+06	922973	1.22919e+06	-778745	450441	2.52358e+06	-1.6006e+06	922973				-7.07929e+06	-2.55733e+06	-6.00908e+06	-5.5296e+06			521125	1.09561e+06	521125	1.09561e+06	-7.00861e+06	-2.38469e+06	-5.93839e+06	-5.35697e+06
2033	-809318	-7.76471e+06	0	0	-8.57403e+06	2.15397e+06	-7.21283e+06	1.39752e+06	0	-3.66134e+06	0	-7.21283e+06	0	0	-7.21283e+06	-1.44309e+06	-7.21283e+06	1.39752e+06	0	-7.25841e+06	1.50037e+06	-947941	552425	3.26446e+06	-2.06585e+06	1.1986e+06	1.50037e+06	-947941	552425	3.26446e+06	-2.06585e+06	1.1986e+06				-8.0216e+06	-2.46274e+06	-6.66041e+06	-6.0598e+06			635216	1.40424e+06	635216	1.40424e+06	-7.93881e+06	-2.2571e+06	-6.57762e+06	-5.85417e+06
2034	-1.00818e+06	-8.67838e+06	0	0	-9.68656e+06	2.46666e+06	-7.9951e+06	1.36028e+06	0	-4.16817e+06	0	-7.9951e+06	0	0	-7.9951e+06	-1.77448e+06	-7.9951e+06	1.36028e+06	0	-8.40931e+06	1.79847e+06	-1.13373e+06	664738	3.99301e+06	-2.52352e+06	1.46949e+06	1.79847e+06	-1.13373e+06	664738	3.99301e+06	-2.52352e+06	1.46949e+06				-9.02182e+06	-2.69868e+06	-7.33036e+06	-6.93982e+06			761189	1.71067e+06	761189	1.71067e+06	-8.92537e+06	-2.4575e+06	-7.23391e+06	-6.69864e+06
2035	-1.2309e+06	-9.63858e+06	0	0	-1.08695e+07	2.78765e+06	-8.80845e+06	1.64619e+06	0	-4.3746e+06	0	-8.80845e+06	0	0	-8.80845e+06	-1.84949e+06	-8.80845e+06	1.64619e+06	0	-9.01175e+06	2.12349e+06	-1.33609e+06	787400	4.26646e+06	-2.68864e+06	1.57783e+06	2.12349e+06	-1.33609e+06	787400	4.26646e+06	-2.68864e+06	1.57783e+06				-1.00821e+07	-2.79677e+06	-8.02105e+06	-7.43392e+06			899130	1.83548e+06	899130	1.83548e+06	-9.97035e+06	-2.53912e+06	-7.90932e+06	-7.17626e+06
2036	-1.47729e+06	-1.06472e+07	0	0	-1.21245e+07	3.11357e+06	-9.6549e+06	1.90999e+06	0	-4.63134e+06	0	-9.6549e+06	0	0	-9.6549e+06	-2.20318e+06	-9.6549e+06	1.90999e+06	0	-9.94809e+06	2.47543e+06	-1.555e+06	920429	5.0757e+06	-3.19347e+06	1.88224e+06	2.47543e+06	-1.555e+06	920429	5.0757e+06	-3.19347e+06	1.88224e+06				-1.12041e+07	-2.7491e+06	-8.73447e+06	-8.06585e+06			1.04913e+06	2.17823e+06	1.04913e+06	2.17823e+06	-1.10754e+07	-2.45311e+06	-8.60577e+06	-7.76985e+06
2037	-1.74702e+06	-1.17061e+07	0	0	-1.34531e+07	3.44184e+06	-1.05364e+07	1.8594e+06	0	-5.23514e+06	0	-1.05364e+07	0	0	-1.05364e+07	-2.55863e+06	-1.05364e+07	1.8594e+06	0	-1.12356e+07	2.85429e+06	-1.79046e+06	1.06384e+06	5.87503e+06	-3.69271e+06	2.18231e+06	2.85429e+06	-1.79046e+06	1.06384e+06	5.87503e+06	-3.69271e+06	2.18231e+06				-1.23893e+07	-3.05283e+06	-9.47254e+06	-9.0533e+06			1.21126e+06	2.5198e+06	1.21126e+06	2.5198e+06	-1.22418e+07	-2.71534e+06	-9.32512e+06	-8.71581e+06
2038	-2.0396e+06	-1.28167e+07	0	0	-1.48563e+07	3.53232e+06	-1.14547e+07	1.80823e+06	0	-6.11417e+06	0	-1.14547e+07	0	0	-1.14547e+07	-2.64852e+06	-1.14547e+07	1.80823e+06	0	-1.2295e+07	3.26008e+06	-2.04244e+06	1.21763e+06	6.21135e+06	-3.89411e+06	2.31723e+06	3.26008e+06	-2.04244e+06	1.21763e+06	6.21135e+06	-3.89411e+06	2.31723e+06				-1.36387e+07	-3.79694e+06	-1.02371e+07	-9.97778e+06			1.38563e+06	2.67628e+06	1.38563e+06	2.67628e+06	-1.34707e+07	-3.43789e+06	-1.00691e+07	-9.61873e+06
2039	-2.45827e+06	-1.40334e+07	0	0	-1.64916e+07	3.60043e+06	-1.24116e+07	2.07179e+06	0	-6.73941e+06	0	-1.24116e+07	0	0	-1.24116e+07	-2.72013e+06	-1.24116e+07	2.07179e+06	0	-1.306e+07	3.69278e+06	-2.31095e+06	1.38183e+06	6.57488e+06	-4.11145e+06	2.46343e+06	3.69278e+06	-2.31095e+06	1.38183e+06	6.57488e+06	-4.11145e+06	2.46343e+06				-1.51098e+07	-4.27599e+06	-1.10298e+07	-1.05965e+07			1.5723e+06	2.84487e+06	1.5723e+06	2.84487e+06	-1.49193e+07	-3.89455e+06	-1.08393e+07	-1.02151e+07
2040	-2.98515e+06	-1.52911e+07	-67835.4	-28090.8	-1.83722e+07	3.64856e+06	-1.34087e+07	2.01776e+06	0	-7.74238e+06	0	-1.34087e+07	0	0	-1.34087e+07	-3.05849e+06	-1.34087e+07	2.01776e+06	0	-1.44494e+07	4.15241e+06	-2.59396e+06	1.55845e+06	7.45471e+06	-4.65625e+06	2.79845e+06	4.15241e+06	-2.59396e+06	1.55845e+06	7.45471e+06	-4.65625e+06	2.79845e+06				-1.68137e+07	-4.94393e+06	-1.18503e+07	-1.1651e+07			1.76525e+06	3.21271e+06	1.76525e+06	3.21271e+06	-1.66069e+07	-4.52967e+06	-1.16435e+07	-1.12367e+07
2041	-3.47445e+06	-1.66411e+07	-135996	-56331.2	-2.03078e+07	3.67872e+06	-1.44474e+07	1.96259e+06	0	-8.80613e+06	0	-1.44474e+07	0	0	-1.44474e+07	-3.12785e+06	-1.44474e+07	1.96259e+06	0	-1.56127e+07	4.28933e+06	-2.67091e+06	1.61842e+06	7.86321e+06	-4.90159e+06	2.96162e+06	4.63895e+06	-2.89332e+06	1.74563e+06	7.86321e+06	-4.90159e+06	2.96162e+06				-1.86894e+07	-5.8445e+06	-1.27018e+07	-1.26511e+07			1.83201e+06	3.39689e+06	1.97026e+06	3.39689e+06	-1.84758e+07	-5.40924e+06	-1.24772e+07	-1.22158e+07
2042	-4.0515e+06	-1.80835e+07	-204493	-84060.2	-2.24236e+07	3.69259e+06	-1.55292e+07	2.22604e+06	0	-9.61057e+06	0	-1.55292e+07	0	0	-1.55292e+07	-3.17971e+06	-1.55292e+07	2.22604e+06	0	-1.64829e+07	4.45345e+06	-2.76472e+06	1.68873e+06	8.29884e+06	-5.16213e+06	3.13671e+06	5.15242e+06	-3.20904e+06	1.94338e+06	8.29884e+06	-5.16213e+06	3.13671e+06				-2.07348e+07	-6.47386e+06	-1.35858e+07	-1.33462e+07			1.90989e+06	3.59297e+06	2.18739e+06	3.59297e+06	-2.05137e+07	-6.0176e+06	-1.33418e+07	-1.28899e+07
2043	-4.56411e+06	-1.95401e+07	-235511	-111702	-2.44514e+07	3.959e+06	-1.66176e+07	2.43445e+06	-16629.2	-1.02408e+07	0	-1.66176e+07	0	-16629.2	-1.66342e+07	-3.50378e+06	-1.66176e+07	2.46336e+06	-16629.2	-1.76746e+07	4.64472e+06	-2.87427e+06	1.77045e+06	9.25922e+06	-5.75189e+06	3.50733e+06	5.69281e+06	-3.53756e+06	2.15524e+06	9.25922e+06	-5.75189e+06	3.50733e+06				-2.26809e+07	-6.73344e+06	-1.4479e+07	-1.41673e+07			1.99609e+06	3.99222e+06	2.41319e+06	3.99222e+06	-2.24553e+07	-6.24855e+06	-1.4221e+07	-1.36824e+07
2044	-5.09301e+06	-2.10101e+07	-266642	-139430	-2.65092e+07	4.31132e+06	-1.77457e+07	2.33554e+06	-33303.9	-1.11322e+07	0	-1.77457e+07	0	-33303.9	-1.7779e+07	-3.82802e+06	-1.77457e+07	2.4009e+06	-33303.9	-1.92061e+07	4.98524e+06	-3.07953e+06	1.90572e+06	1.00261e+07	-6.21795e+06	3.80815e+06	6.18434e+06	-3.83386e+06	2.35047e+06	1.01323e+07	-6.28551e+06	3.84679e+06				-2.46035e+07	-7.32401e+06	-1.54285e+07	-1.53594e+07			2.14171e+06	4.3173e+06	2.62097e+06	4.35927e+06	-2.43675e+07	-6.81486e+06	-1.5158e+07	-1.48469e+07
2045	-5.56397e+06	-2.2493e+07	-297890	-167249	-2.85221e+07	4.69092e+06	-1.89154e+07	2.57959e+06	-50026.5	-1.16949e+07	0	-1.89154e+07	0	-50026.5	-1.89654e+07	-3.90639e+06	-1.89154e+07	2.65259e+06	-50026.5	-2.02192e+07	5.35279e+06	-3.30215e+06	2.05065e+06	1.03407e+07	-6.39312e+06	3.94758e+06	6.70283e+06	-4.14629e+06	2.55654e+06	1.05804e+07	-6.54544e+06	4.03496e+06				-2.64714e+07	-7.74729e+06	-1.64088e+07	-1.61842e+07			2.2988e+06	4.46539e+06	2.84058e+06	4.56039e+06	-2.62233e+07	-7.22948e+06	-1.61248e+07	-1.56588e+07
2046	-5.97287e+06	-2.39882e+07	-329260	-195164	-3.04855e+07	5.03209e+06	-2.0128e+07	2.80155e+06	-66799.6	-1.23612e+07	0	-2.0128e+07	0	-66799.6	-2.01948e+07	-4.24338e+06	-2.0128e+07	2.88222e+06	-66799.6	-2.1556e+07	5.74735e+06	-3.54118e+06	2.20617e+06	1.12676e+07	-6.95728e+06	4.31027e+06	7.24828e+06	-4.47521e+06	2.77307e+06	1.15345e+07	-7.12597e+06	4.40856e+06				-2.82793e+07	-8.0509e+06	-1.74217e+07	-1.71474e+07			2.46744e+06	4.85627e+06	3.07207e+06	4.96262e+06	-2.8018e+07	-7.5049e+06	-1.71227e+07	-1.65934e+07
2047	-6.31614e+06	-2.54951e+07	-360755	-223177	-3.23952e+07	5.37186e+06	-2.1385e+07	2.71088e+06	-83625.5	-1.33858e+07	0	-2.1385e+07	0	-83625.5	-2.14686e+07	-4.57652e+06	-2.1385e+07	2.8067e+06	-83625.5	-2.32384e+07	6.16891e+06	-3.79657e+06	2.37234e+06	1.21849e+07	-7.51619e+06	4.66875e+06	7.82069e+06	-4.8205e+06	3.00019e+06	1.24792e+07	-7.70067e+06	4.77854e+06				-3.00229e+07	-8.71709e+06	-1.84684e+07	-1.84599e+07			2.64768e+06	5.24559e+06	3.3155e+06	5.36336e+06	-2.97475e+07	-8.14025e+06	-1.81531e+07	-1.7875e+07
2048	-6.66795e+06	-2.70538e+07	-392379	-251292	-3.43654e+07	5.47034e+06	-2.26872e+07	2.62727e+06	-100507	-1.46901e+07	0	-2.26872e+07	0	-100507	-2.27877e+07	-4.65572e+06	-2.26872e+07	2.72338e+06	-100507	-2.47201e+07	6.61746e+06	-4.06824e+06	2.54922e+06	1.26413e+07	-7.77871e+06	4.86257e+06	8.42005e+06	-5.18207e+06	3.23798e+06	1.29902e+07	-7.9965e+06	4.99367e+06				-3.18162e+07	-9.82756e+06	-1.95498e+07	-1.97264e+07			2.83959e+06	5.45468e+06	3.57094e+06	5.59474e+06	-3.15258e+07	-9.23546e+06	-1.92168e+07	-1.91253e+07
2049	-7.0277e+06	-2.86645e+07	-424135	-279514	-3.63959e+07	5.52642e+06	-2.40357e+07	2.85678e+06	-117446	-1.57699e+07	0	-2.40357e+07	0	-117446	-2.41531e+07	-4.69768e+06	-2.40357e+07	2.9532e+06	-117446	-2.58976e+07	7.09299e+06	-4.35615e+06	2.73685e+06	1.3152e+07	-8.07443e+06	5.07762e+06	9.04636e+06	-5.55982e+06	3.48653e+06	1.35009e+07	-8.29071e+06	5.21015e+06				-3.3659e+07	-1.06923e+07	-2.06666e+07	-2.06875e+07			3.04322e+06	5.68632e+06	3.83844e+06	5.82717e+06	-3.33526e+07	-1.00836e+07	-2.03147e+07	-2.00705e+07
2050	-7.39495e+06	-3.03278e+07	-453408	-307844	-3.8484e+07	5.55701e+06	-2.5431e+07	2.77144e+06	-134444	-1.7237e+07	0	-2.5431e+07	0	-134444	-2.55655e+07	-5.0018e+06	-2.5431e+07	2.875e+06	-134444	-2.76923e+07	7.5955e+06	-4.65047e+06	2.94503e+06	1.41776e+07	-8.67973e+06	5.49785e+06	9.69961e+06	-5.94105e+06	3.75856e+06	1.45263e+07	-8.89439e+06	5.63194e+06				-3.55389e+07	-1.17392e+07	-2.18069e+07	-2.20603e+07	2050 year		3.23403e+06	6.0736e+06	4.08621e+06	6.21499e+06	-3.52499e+07	-1.11634e+07	-2.14792e+07	-2.14773e+07
2051	-7.7695e+06	-3.20438e+07	-482780	-336288	-4.06324e+07	5.56465e+06	-2.68737e+07	2.68514e+06	-151505	-1.87754e+07	0	-2.68737e+07	0	-151505	-2.70252e+07	-5.04956e+06	-2.68737e+07	2.78893e+06	-151505	-2.92858e+07	8.12498e+06	-4.96039e+06	3.16459e+06	1.47333e+07	-8.99237e+06	5.7409e+06	1.03798e+07	-6.33775e+06	4.04204e+06	1.51093e+07	-9.22265e+06	5.88662e+06				-3.74678e+07	-1.30345e+07	-2.29831e+07	-2.33992e+07			3.43528e+06	6.2948e+06	4.34465e+06	6.44649e+06	-3.71971e+07	-1.24806e+07	-2.26805e+07	-2.28393e+07
2052	-8.14678e+06	-3.38167e+07	-512255	-362548	-4.28382e+07	5.55148e+06	-2.837e+07	2.88268e+06	-167300	-2.01032e+07	0	-2.837e+07	0	-167300	-2.85373e+07	-5.06181e+06	-2.837e+07	3.01365e+06	-167300	-3.05855e+07	8.68142e+06	-5.28585e+06	3.39557e+06	1.5316e+07	-9.31931e+06	5.99667e+06	1.10869e+07	-6.74989e+06	4.33704e+06	1.56919e+07	-9.54838e+06	6.14355e+06				-3.94427e+07	-1.41065e+07	-2.42003e+07	-2.44419e+07			3.64701e+06	6.52652e+06	4.61381e+06	6.67879e+06	-3.91912e+07	-1.35767e+07	-2.39235e+07	-2.39067e+07
2053	-8.53109e+06	-3.56997e+07	-541837	-388891	-4.51615e+07	5.78676e+06	-2.99716e+07	3.05692e+06	-183139	-2.1311e+07	0	-2.99716e+07	0	-183139	-3.01547e+07	-5.34173e+06	-2.99716e+07	3.22206e+06	-183139	-3.22744e+07	9.26483e+06	-5.62684e+06	3.63799e+06	1.63163e+07	-9.9064e+06	6.40989e+06	1.1821e+07	-7.1774e+06	4.6436e+06	1.67982e+07	-1.02002e+07	6.59798e+06				-4.15235e+07	-1.49011e+07	-2.55111e+07	-2.56764e+07			3.86927e+06	6.90829e+06	4.89372e+06	7.09899e+06	-4.12923e+07	-1.44027e+07	-2.5261e+07	-2.51754e+07
2054	-8.92299e+06	-3.76061e+07	-571529	-415322	-4.75159e+07	6.10334e+06	-3.15912e+07	2.95131e+06	-199025	-2.27356e+07	0	-3.15912e+07	0	-199025	-3.17902e+07	-5.63691e+06	-3.15912e+07	3.1307e+06	-199025	-3.42964e+07	9.87519e+06	-5.9833e+06	3.89189e+06	1.73053e+07	-1.04857e+07	6.81958e+06	1.2582e+07	-7.62026e+06	4.96174e+06	1.79204e+07	-1.08611e+07	7.05926e+06				-4.3624e+07	-1.5916e+07	-2.68285e+07	-2.72372e+07			4.10208e+06	7.28762e+06	5.18443e+06	7.52667e+06	-4.34138e+07	-1.5448e+07	-2.66058e+07	-2.67698e+07
2055	-9.32297e+06	-3.9569e+07	-601334	-441842	-4.99352e+07	6.44448e+06	-3.32621e+07	3.15953e+06	-214960	-2.3873e+07	0	-3.32621e+07	0	-214960	-3.3477e+07	-5.66915e+06	-3.32621e+07	3.34627e+06	-214960	-3.57999e+07	1.05125e+07	-6.35522e+06	4.15729e+06	1.79216e+07	-1.08302e+07	7.09139e+06	1.33699e+07	-8.07843e+06	5.29151e+06	1.85912e+07	-1.12376e+07	7.35363e+06				-4.57779e+07	-1.67816e+07	-2.81855e+07	-2.84463e+07			4.34551e+06	7.53538e+06	5.48598e+06	7.7949e+06	-4.55897e+07	-1.63376e+07	-2.79911e+07	-2.8005e+07
2056	-9.73151e+06	-4.15885e+07	-631255	-468456	-5.24198e+07	6.74486e+06	-3.4984e+07	3.34627e+06	-230945	-2.51239e+07	0	-3.4984e+07	0	-230945	-3.5215e+07	-5.95632e+06	-3.4984e+07	3.54734e+06	-230945	-3.7624e+07	1.11768e+07	-6.74256e+06	4.43421e+06	1.90703e+07	-1.15042e+07	7.56609e+06	1.41848e+07	-8.55189e+06	5.63293e+06	1.97671e+07	-1.1926e+07	7.84111e+06				-4.79855e+07	-1.75578e+07	-2.95821e+07	-2.97829e+07			4.59958e+06	7.97434e+06	5.79841e+06	8.24464e+06	-4.78202e+07	-1.71495e+07	-2.94166e+07	-2.93793e+07
2057	-1.01491e+07	-4.3083e+07	-1.86369e+06	-1.09318e+06	-5.61889e+07	7.04272e+06	-3.67568e+07	3.2349e+06	-246984	-2.67262e+07	0	-3.67568e+07	0	-246984	-3.70038e+07	-6.25553e+06	-3.67568e+07	3.4434e+06	-246984	-3.9816e+07	1.1868e+07	-7.14529e+06	4.72269e+06	2.02097e+07	-1.21719e+07	8.03774e+06	1.50266e+07	-9.0406e+06	5.98602e+06	2.0961e+07	-1.26252e+07	8.33582e+06				-5.14662e+07	-1.86885e+07	-3.10178e+07	-3.14801e+07			4.86433e+06	8.41178e+06	6.12176e+06	8.70268e+06	-5.13246e+07	-1.83144e+07	-3.08821e+07	-3.11133e+07
2058	-9.42738e+06	-4.45478e+07	-3.09172e+06	-1.71575e+06	-5.87826e+07	7.09688e+06	-3.85784e+07	3.12328e+06	-263077	-2.86213e+07	0	-3.85784e+07	0	-263077	-3.88414e+07	-6.28449e+06	-3.85784e+07	3.33231e+06	-263077	-4.17936e+07	9.69278e+06	-5.76299e+06	3.92979e+06	2.09161e+07	-1.25668e+07	8.34931e+06	1.58954e+07	-9.54455e+06	6.35081e+06	2.16946e+07	-1.30346e+07	8.66001e+06				-5.48528e+07	-2.0272e+07	-3.24906e+07	-3.31336e+07			4.10584e+06	8.69631e+06	6.45608e+06	8.99812e+06	-5.46768e+07	-1.9925e+07	-3.23854e+07	-3.27955e+07
2059	-8.55866e+06	-4.59929e+07	-4.30548e+06	-2.33127e+06	-6.11884e+07	7.10638e+06	-4.04479e+07	3.31734e+06	-279226	-3.03034e+07	0	-4.04479e+07	0	-279226	-4.07272e+07	-6.27393e+06	-4.04479e+07	3.52692e+06	-279226	-4.34742e+07	7.54515e+06	-4.4028e+06	3.14235e+06	2.16495e+07	-1.29765e+07	8.673e+06	1.6791e+07	-1.00637e+07	6.72731e+06	2.24279e+07	-1.34419e+07	8.98604e+06				-5.8046e+07	-2.16305e+07	-3.39999e+07	-3.44881e+07			3.35364e+06	8.99159e+06	6.8014e+06	9.29461e+06	-5.78347e+07	-2.13119e+07	-3.39258e+07	-3.41796e+07
2060	-7.56143e+06	-4.74269e+07	-5.50765e+06	-2.94106e+06	-6.3437e+07	7.08903e+06	-4.23645e+07	3.20354e+06	-295434	-3.23674e+07	0	-4.23645e+07	0	-295434	-4.26599e+07	-6.52529e+06	-4.23645e+07	3.42065e+06	-295434	-4.57646e+07	5.42505e+06	-3.07951e+06	2.34554e+06	2.28969e+07	-1.37068e+07	9.1901e+06	1.77136e+07	-1.05981e+07	7.11556e+06	2.36753e+07	-1.417e+07	9.50528e+06				-6.10915e+07	-2.31773e+07	-3.55444e+07	-3.62593e+07			2.60778e+06	9.47177e+06	7.15777e+06	9.776e+06	-6.08292e+07	-2.28956e+07	-3.55022e+07	-3.59886e+07
2061	-6.45183e+06	-4.88198e+07	-6.70035e+06	-3.54618e+06	-6.55182e+07	7.04749e+06	-4.42902e+07	3.08888e+06	-311702	-3.44655e+07	0	-4.42902e+07	0	-311702	-4.46019e+07	-6.51883e+06	-4.42902e+07	3.30661e+06	-311702	-4.78141e+07	3.33243e+06	-1.78905e+06	1.54338e+06	2.36752e+07	-1.41443e+07	9.53086e+06	1.86632e+07	-1.11476e+07	7.51555e+06	2.44808e+07	-1.46226e+07	9.85819e+06				-6.39748e+07	-2.49347e+07	-3.70863e+07	-3.79559e+07			1.86831e+06	9.78621e+06	7.52523e+06	1.01014e+07	-6.36499e+07	-2.46793e+07	-3.70767e+07	-3.77127e+07
2062	-5.24409e+06	-5.02107e+07	-7.88518e+06	-4.14744e+06	-6.74874e+07	6.98405e+06	-4.62567e+07	3.28511e+06	-328032	-3.63156e+07	0	-4.62567e+07	0	-328032	-4.65848e+07	-6.47542e+06	-4.62567e+07	3.50348e+06	-328032	-4.95567e+07	1.26725e+06	-528238	739011	2.44804e+07	-1.4596e+07	9.88445e+06	1.96396e+07	-1.17123e+07	7.92731e+06	2.5286e+07	-1.50725e+07	1.02134e+07				-6.67484e+07	-2.64312e+07	-3.86574e+07	-3.93433e+07			1.13525e+06	1.01115e+07	7.90382e+06	1.04279e+07	-6.63521e+07	-2.62041e+07	-3.86809e+07	-3.91288e+07
2063	-3.95629e+06	-5.16061e+07	-9.06342e+06	-4.74546e+06	-6.93712e+07	7.16738e+06	-4.82617e+07	3.43122e+06	-344425	-3.80075e+07	0	-4.82617e+07	0	-344425	-4.86061e+07	-6.70014e+06	-4.82617e+07	3.68414e+06	-344425	-5.16221e+07	-770535	705339	-65195.4	2.58086e+07	-1.53736e+07	1.04351e+07	2.0643e+07	-1.22921e+07	8.35086e+06	2.66141e+07	-1.58484e+07	1.07657e+07				-6.94364e+07	-2.75724e+07	-4.02552e+07	-4.08564e+07			408664	1.06251e+07	8.29358e+06	1.09427e+07	-6.89626e+07	-2.73824e+07	-4.03125e+07	-4.06794e+07
2064	-2.59982e+06	-5.30496e+07	-1.0236e+07	-5.34073e+06	-7.12262e+07	7.43043e+06	-5.0343e+07	3.27758e+06	-360884	-3.99959e+07	0	-5.0343e+07	0	-360884	-5.07039e+07	-6.94035e+06	-5.0343e+07	3.56514e+06	-360884	-5.40791e+07	-2.78095e+06	1.91359e+06	-867366	2.70197e+07	-1.60771e+07	1.09426e+07	2.16733e+07	-1.28871e+07	8.7862e+06	2.79583e+07	-1.66334e+07	1.13249e+07				-7.20936e+07	-2.90533e+07	-4.19177e+07	-4.27542e+07			-311418	1.10988e+07	8.69456e+06	1.14654e+07	-7.15376e+07	-2.88971e+07	-4.20093e+07	-4.26138e+07
2065	-1.18491e+06	-5.45145e+07	-1.14038e+07	-5.93364e+06	-7.30369e+07	7.71767e+06	-5.2469e+07	3.45784e+06	-377410	-4.16709e+07	0	-5.2469e+07	0	-377410	-5.28464e+07	-6.91671e+06	-5.2469e+07	3.75318e+06	-377410	-5.60099e+07	-4.76404e+06	3.09798e+06	-1.66606e+06	2.778e+07	-1.64963e+07	1.12837e+07	2.27306e+07	-1.34972e+07	9.23336e+06	2.88516e+07	-1.71338e+07	1.17178e+07				-7.4703e+07	-3.03872e+07	-4.3613e+07	-4.42921e+07			-1.02495e+06	1.14133e+07	9.10679e+06	1.18289e+07	-7.40619e+07	-3.02576e+07	-4.37396e+07	-4.4181e+07
2066	279252	-5.60047e+07	-1.25674e+07	-6.5245e+06	-7.48173e+07	7.9639e+06	-5.46389e+07	3.61671e+06	-394004	-4.34523e+07	0	-5.46389e+07	0	-394004	-5.50329e+07	-7.14892e+06	-5.46389e+07	3.92681e+06	-394004	-5.8255e+07	-6.71981e+06	4.25969e+06	-2.46012e+06	2.91506e+07	-1.72942e+07	1.18565e+07	2.38147e+07	-1.41224e+07	9.69234e+06	3.02494e+07	-1.79461e+07	1.23034e+07				-7.72774e+07	-3.15958e+07	-4.53405e+07	-4.59516e+07			-1.7319e+06	1.19472e+07	9.53033e+06	1.23742e+07	-7.65492e+07	-3.1505e+07	-4.55026e+07	-4.58807e+07
2067	1.78435e+06	-5.75235e+07	-1.37271e+07	-7.11353e+06	-7.65798e+07	8.2075e+06	-5.6243e+07	3.47061e+06	-1.0489e+06	-4.56138e+07	0	-5.68522e+07	0	-410668	-5.72628e+07	-7.39373e+06	-5.68522e+07	3.79553e+06	-410668	-6.0861e+07	-8.64831e+06	5.39965e+06	-3.24866e+06	3.0512e+07	-1.80862e+07	1.24259e+07	2.49258e+07	-1.47627e+07	1.01632e+07	3.16653e+07	-1.87691e+07	1.28962e+07				-7.98285e+07	-3.31879e+07	-4.70997e+07	-4.79648e+07			-2.43221e+06	1.248e+07	9.9652e+06	1.29283e+07	-7.90121e+07	-3.31338e+07	-4.72976e+07	-4.79328e+07
2068	3.31675e+06	-5.90738e+07	-1.48836e+07	-7.70094e+06	-7.83415e+07	8.3267e+06	-5.78065e+07	3.33128e+06	-1.70146e+06	-4.78499e+07	0	-5.91049e+07	0	-427404	-5.95323e+07	-7.36858e+06	-5.91049e+07	3.6572e+06	-427404	-6.32437e+07	-1.05495e+07	6.51857e+06	-4.03097e+06	3.03888e+07	-1.795e+07	1.24388e+07	2.60638e+07	-1.5418e+07	1.06458e+07	3.26213e+07	-1.93022e+07	1.33191e+07				-8.23725e+07	-3.54111e+07	-4.88865e+07	-4.99246e+07			-3.12585e+06	1.2484e+07	1.04115e+07	1.332e+07	-8.14674e+07	-3.5366e+07	-4.91209e+07	-4.99237e+07
2069	4.86958e+06	-6.06582e+07	-1.60369e+07	-8.28687e+06	-8.01124e+07	8.42743e+06	-5.93378e+07	3.49771e+06	-2.34646e+06	-4.97591e+07	0	-6.13967e+07	0	-444212	-6.18409e+07	-7.30473e+06	-6.13967e+07	3.82466e+06	-444212	-6.53209e+07	-1.24236e+07	7.61705e+06	-4.8065e+06	3.032e+07	-1.78481e+07	1.24719e+07	2.72288e+07	-1.60885e+07	1.11403e+07	3.35771e+07	-1.98333e+07	1.37438e+07				-8.49189e+07	-3.72872e+07	-5.07006e+07	-5.15771e+07			-3.81277e+06	1.25071e+07	1.08691e+07	1.37132e+07	-8.39252e+07	-3.7252e+07	-5.09717e+07	-5.16078e+07
2070	6.43665e+06	-6.22815e+07	-1.71874e+07	-8.87146e+06	-8.19038e+07	8.67402e+06	-6.08467e+07	3.35637e+06	-2.98531e+06	-5.18016e+07	0	-6.37291e+07	0	-461096	-6.41902e+07	-7.50351e+06	-6.37291e+07	3.69134e+06	-461096	-6.80024e+07	-1.42703e+07	8.69556e+06	-5.57478e+06	3.0765e+07	-1.80746e+07	1.26904e+07	2.84206e+07	-1.6774e+07	1.16467e+07	3.50465e+07	-2.06851e+07	1.43613e+07				-8.74786e+07	-3.91113e+07	-5.25435e+07	-5.3641e+07			-4.49293e+06	1.27139e+07	1.13383e+07	1.42916e+07	-8.63967e+07	-3.90877e+07	-5.28519e+07	-5.37108e+07
2071	8.01238e+06	-6.3942e+07	-1.83353e+07	-9.45481e+06	-8.37198e+07	8.92631e+06	-6.23357e+07	3.21425e+06	-3.61914e+06	-5.38143e+07	0	-6.6098e+07	0	-478055	-6.6576e+07	-7.44486e+06	-6.6098e+07	3.55034e+06	-478055	-7.04706e+07	-1.60899e+07	9.75448e+06	-6.33545e+06	3.07412e+07	-1.80143e+07	1.27269e+07	2.96394e+07	-1.74745e+07	1.21649e+07	3.60743e+07	-2.12614e+07	1.48129e+07				-9.00552e+07	-4.10874e+07	-5.44111e+07	-5.56576e+07			-5.1663e+06	1.27538e+07	1.18189e+07	1.47143e+07	-8.88861e+07	-4.10605e+07	-5.47571e+07	-5.57563e+07
2072	9.59172e+06	-6.50474e+07	-1.80022e+07	-1.0037e+07	-8.34949e+07	9.18323e+06	-6.32164e+07	3.38151e+06	-4.2488e+06	-5.49005e+07	0	-6.7225e+07	0	-1.22172e+06	-6.84467e+07	-7.35019e+06	-6.79088e+07	3.74569e+06	-495091	-7.20084e+07	-1.78823e+07	1.07941e+07	-7.08821e+06	3.07446e+07	-1.79733e+07	1.27713e+07	3.08851e+07	-1.81901e+07	1.2695e+07	3.71019e+07	-2.1835e+07	1.52669e+07				-9.05831e+07	-4.21291e+07	-5.57517e+07	-5.67415e+07			-5.83282e+06	1.28032e+07	1.23111e+07	1.51386e+07	-8.93277e+07	-4.20972e+07	-5.61356e+07	-5.68698e+07
2073	9.78128e+06	-6.62408e+07	-1.76656e+07	-1.06141e+07	-8.47391e+07	9.17256e+06	-6.40841e+07	3.23363e+06	-4.87314e+06	-5.6551e+07	0	-6.82984e+07	0	-1.96201e+06	-7.02604e+07	-7.53878e+06	-6.97477e+07	3.63278e+06	-512012	-7.41657e+07	-1.73149e+07	1.03576e+07	-6.9573e+06	3.11649e+07	-1.81894e+07	1.29755e+07	3.09507e+07	-1.81618e+07	1.2789e+07	3.8652e+07	-2.27257e+07	1.59263e+07				-9.16964e+07	-4.35756e+07	-5.74714e+07	-5.82395e+07			-5.65392e+06	1.29947e+07	1.2376e+07	1.57426e+07	-9.0393e+07	-4.35563e+07	-5.78843e+07	-5.84231e+07
2074	9.69716e+06	-6.75162e+07	-1.73446e+07	-1.11899e+07	-8.63535e+07	9.20646e+06	-6.49446e+07	3.1044e+06	-5.49427e+06	-5.8128e+07	0	-6.93288e+07	0	-2.6934e+06	-7.20222e+07	-7.47155e+06	-7.16155e+07	3.51861e+06	-529007	-7.60975e+07	-1.67205e+07	9.90787e+06	-6.81268e+06	3.11075e+07	-1.81105e+07	1.2997e+07	3.10434e+07	-1.81513e+07	1.28921e+07	3.97517e+07	-2.33347e+07	1.6417e+07				-9.31661e+07	-4.5131e+07	-5.913e+07	-5.96805e+07			-5.46461e+06	1.3016e+07	1.24507e+07	1.61877e+07	-9.18181e+07	-4.51119e+07	-5.95715e+07	-5.99098e+07
2075	9.3764e+06	-6.87939e+07	-1.72267e+07	-1.15203e+07	-8.81645e+07	9.23573e+06	-6.57996e+07	3.19956e+06	-5.81785e+06	-5.91822e+07	0	-7.0322e+07	0	-3.08195e+06	-7.3404e+07	-7.38754e+06	-7.35096e+07	3.62195e+06	-546077	-7.78212e+07	-1.60993e+07	9.63564e+06	-6.46367e+06	3.11557e+07	-1.80839e+07	1.30718e+07	3.11631e+07	-1.81299e+07	1.30332e+07	4.08783e+07	-2.36326e+07	1.72457e+07				-9.46282e+07	-4.61104e+07	-6.03708e+07	-6.05755e+07			-5.44337e+06	1.30606e+07	1.25002e+07	1.63191e+07	-9.36079e+07	-4.61216e+07	-6.09038e+07	-6.15022e+07
2076	8.98121e+06	-7.01323e+07	-1.69913e+07	-1.21258e+07	-9.02682e+07	9.20049e+06	-6.6649e+07	3.06667e+06	-6.43369e+06	-6.08155e+07	0	-7.12811e+07	0	-3.80008e+06	-7.50812e+07	-7.56528e+06	-7.54253e+07	3.50423e+06	-563224	-8.00495e+07	-1.58248e+07	9.4135e+06	-6.41128e+06	3.17356e+07	-1.8406e+07	1.33296e+07	3.13099e+07	-1.81657e+07	1.31441e+07	4.25092e+07	-2.45693e+07	1.794e+07				-9.66795e+07	-4.7486e+07	-6.1937e+07	-6.21096e+07			-5.36676e+06	1.33097e+07	1.25944e+07	1.69571e+07	-9.5635e+07	-4.75058e+07	-6.24868e+07	-6.30925e+07
2077	8.39982e+06	-7.14499e+07	-1.67416e+07	-1.26312e+07	-9.24229e+07	9.1433e+06	-6.74942e+07	2.93565e+06	-6.96814e+06	-6.23834e+07	0	-7.22102e+07	0	-4.42431e+06	-7.66345e+07	-7.48324e+06	-7.66157e+07	3.37749e+06	-1.28328e+06	-8.20048e+07	-1.55233e+07	9.20454e+06	-6.31877e+06	3.18289e+07	-1.84194e+07	1.34095e+07	3.14836e+07	-1.82105e+07	1.32731e+07	4.36807e+07	-2.51377e+07	1.85431e+07				-9.87417e+07	-4.89739e+07	-6.33614e+07	-6.34617e+07			-5.30074e+06	1.33791e+07	1.26864e+07	1.73525e+07	-9.77237e+07	-4.90044e+07	-6.3948e+07	-6.46522e+07
2078	7.79632e+06	-7.27433e+07	-1.65212e+07	-1.32347e+07	-9.47029e+07	9.16379e+06	-6.83366e+07	3.11478e+06	-7.57973e+06	-6.36378e+07	0	-7.31129e+07	0	-5.13316e+06	-7.8246e+07	-7.36958e+06	-7.77371e+07	3.55803e+06	-2.09709e+06	-8.36458e+07	-1.51949e+07	8.96381e+06	-6.2311e+06	3.19456e+07	-1.84527e+07	1.34928e+07	3.16844e+07	-1.82873e+07	1.33971e+07	4.35644e+07	-2.49811e+07	1.85833e+07				-1.00934e+08	-5.0145e+07	-6.48489e+07	-6.50625e+07			-5.20406e+06	1.34634e+07	1.28004e+07	1.73694e+07	-9.9907e+07	-5.01744e+07	-6.54456e+07	-6.62764e+07
2079	7.18409e+06	-7.40104e+07	-1.63064e+07	-1.38373e+07	-9.697e+07	9.17257e+06	-6.91786e+07	2.97056e+06	-8.18946e+06	-6.5225e+07	0	-7.39936e+07	0	-5.83836e+06	-7.98319e+07	-7.52513e+06	-7.87992e+07	3.41527e+06	-2.90109e+06	-8.58102e+07	-1.48396e+07	8.71128e+06	-6.1283e+06	3.2609e+07	-1.88286e+07	1.37804e+07	3.19123e+07	-1.83833e+07	1.35289e+07	4.39676e+07	-2.51513e+07	1.88163e+07				-1.03098e+08	-5.14445e+07	-6.6303e+07	-6.69939e+07			-5.0973e+06	1.37434e+07	1.29243e+07	1.75719e+07	-1.02067e+08	-5.14815e+07	-6.69077e+07	-6.82383e+07
2080	6.57502e+06	-7.52475e+07	-1.60963e+07	-1.4439e+07	-9.92077e+07	9.33285e+06	-7.00203e+07	2.82518e+06	-8.79747e+06	-6.66597e+07	0	-7.48541e+07	0	-6.54035e+06	-8.13944e+07	-7.40129e+06	-7.9808e+07	3.27833e+06	-3.6971e+06	-8.76281e+07	-1.44573e+07	8.44607e+06	-6.01124e+06	3.27797e+07	-1.88977e+07	1.38821e+07	3.21671e+07	-1.84979e+07	1.36692e+07	4.38781e+07	-2.50228e+07	1.88553e+07				-1.05219e+08	-5.27776e+07	-6.77252e+07	-6.87728e+07			-4.98041e+06	1.38481e+07	1.30581e+07	1.75987e+07	-1.04188e+08	-5.28116e+07	-6.83363e+07	-7.00294e+07
2081	5.9797e+06	-7.64481e+07	-1.58903e+07	-1.50398e+07	-1.01398e+08	9.50358e+06	-7.08587e+07	3.0055e+06	-9.40385e+06	-6.77535e+07	0	-7.56929e+07	0	-7.23952e+06	-8.29324e+07	-7.27677e+06	-8.07656e+07	3.4602e+06	-4.4865e+06	-8.90687e+07	-1.40481e+07	8.16768e+06	-5.88043e+06	3.29775e+07	-1.8982e+07	1.39955e+07	3.2449e+07	-1.86305e+07	1.38185e+07	4.38429e+07	-2.49332e+07	1.89097e+07				-1.07279e+08	-5.3758e+07	-6.9114e+07	-7.0159e+07			-4.85337e+06	1.39627e+07	1.3202e+07	1.76447e+07	-1.06252e+08	-5.37908e+07	-6.97305e+07	-7.1424e+07
2082	5.40762e+06	-7.76497e+07	-1.56878e+07	-1.56397e+07	-1.0357e+08	9.68305e+06	-7.16941e+07	2.86235e+06	-1.00087e+07	-6.91574e+07	0	-7.65118e+07	0	-7.93614e+06	-8.44479e+07	-7.42277e+06	-8.16765e+07	3.31866e+06	-5.27037e+06	-9.1051e+07	-1.3612e+07	7.87574e+06	-5.73623e+06	3.37219e+07	-1.94083e+07	1.43136e+07	3.27579e+07	-1.87809e+07	1.3977e+07	4.43272e+07	-2.51738e+07	1.91533e+07				-1.09306e+08	-5.48438e+07	-7.04709e+07	-7.18976e+07			-4.71613e+06	1.42731e+07	1.33558e+07	1.78766e+07	-1.08286e+08	-5.48843e+07	-7.10921e+07	-7.31744e+07
2083	4.79006e+06	-7.88505e+07	-1.54884e+07	-1.62389e+07	-1.05788e+08	9.62023e+06	-7.25263e+07	2.69102e+06	-1.06121e+07	-7.08272e+07	0	-7.73118e+07	0	-8.63046e+06	-8.59422e+07	-7.28967e+06	-8.25442e+07	3.18284e+06	-6.04955e+06	-9.27006e+07	-1.31489e+07	7.56998e+06	-5.57893e+06	3.39737e+07	-1.95275e+07	1.44462e+07	3.30938e+07	-1.89486e+07	1.41451e+07	4.43188e+07	-2.51114e+07	1.92075e+07				-1.11367e+08	-5.6381e+07	-7.17971e+07	-7.34931e+07			-4.56867e+06	1.44082e+07	1.35197e+07	1.79328e+07	-1.10356e+08	-5.6419e+07	-7.24225e+07	-7.47678e+07
2084	4.13268e+06	-8.00513e+07	-1.5292e+07	-1.68373e+07	-1.08048e+08	9.60623e+06	-7.33579e+07	2.84531e+06	-1.12142e+07	-7.21205e+07	0	-7.80966e+07	0	-9.32265e+06	-8.74192e+07	-7.15908e+06	-8.33745e+07	3.37273e+06	-6.8247e+06	-9.39855e+07	-1.26589e+07	7.25019e+06	-5.40872e+06	3.41467e+07	-1.95957e+07	1.4551e+07	3.34567e+07	-1.91335e+07	1.43231e+07	4.43648e+07	-2.50843e+07	1.92805e+07				-1.13457e+08	-5.75696e+07	-7.30961e+07	-7.4705e+07			-4.41094e+06	1.45154e+07	1.36938e+07	1.80084e+07	-1.12459e+08	-5.76051e+07	-7.37254e+07	-7.59771e+07
2085	3.44058e+06	-8.12507e+07	-1.50703e+07	-1.7435e+07	-1.10315e+08	9.59135e+06	-7.41888e+07	2.68617e+06	-1.18149e+07	-7.37261e+07	0	-7.88671e+07	0	-1.00129e+07	-8.888e+07	-7.31679e+06	-8.41701e+07	3.22136e+06	-7.59633e+06	-9.58618e+07	-1.2142e+07	6.89227e+06	-5.24971e+06	3.48664e+07	-2.00242e+07	1.48422e+07	3.38465e+07	-1.93408e+07	1.45058e+07	4.49573e+07	-2.54119e+07	1.95455e+07				-1.15565e+08	-5.8884e+07	-7.43742e+07	-7.63164e+07			-4.262e+06	1.47385e+07	1.38192e+07	1.81971e+07	-1.14577e+08	-5.89876e+07	-7.50608e+07	-7.76648e+07
2086	2.71838e+06	-8.24444e+07	-1.4851e+07	-1.8032e+07	-1.12609e+08	9.51532e+06	-7.50159e+07	2.52579e+06	-1.24144e+07	-7.53892e+07	0	-7.96216e+07	0	-1.07012e+07	-9.03228e+07	-7.18201e+06	-8.49307e+07	3.07579e+06	-8.36484e+06	-9.74018e+07	-1.15981e+07	6.51916e+06	-5.07897e+06	3.51719e+07	-2.01784e+07	1.49934e+07	3.42634e+07	-1.95658e+07	1.46976e+07	4.50301e+07	-2.53967e+07	1.96334e+07				-1.17688e+08	-6.03957e+07	-7.56252e+07	-7.77684e+07			-4.10494e+06	1.48394e+07	1.39527e+07	1.82322e+07	-1.16714e+08	-6.05498e+07	-7.63701e+07	-7.91695e+07
2087	1.97021e+06	-8.36294e+07	-1.46339e+07	-1.86545e+07	-1.14948e+08	9.4204e+06	-7.58392e+07	2.71144e+06	-1.30453e+07	-7.67527e+07	0	-8.03606e+07	0	-1.1427e+07	-9.17876e+07	-7.0502e+06	-8.56586e+07	3.27628e+06	-9.17566e+06	-9.86081e+07	-1.10273e+07	6.13079e+06	-4.89656e+06	3.55044e+07	-2.03488e+07	1.51555e+07	3.47073e+07	-1.98084e+07	1.48989e+07	4.51571e+07	-2.54172e+07	1.97399e+07				-1.19844e+08	-6.15972e+07	-7.68887e+07	-7.88682e+07			-3.93974e+06	1.49484e+07	1.40943e+07	1.82834e+07	-1.18887e+08	-6.18043e+07	-7.76933e+07	-8.03247e+07
2088	1.20336e+06	-8.48043e+07	-1.44189e+07	-1.92759e+07	-1.17296e+08	9.40595e+06	-7.66161e+07	2.87704e+06	-1.36923e+07	-7.80254e+07	0	-8.10845e+07	0	-1.21507e+07	-9.32352e+07	-7.20804e+06	-8.63552e+07	3.4699e+06	-9.98352e+06	-1.00077e+08	-1.04296e+07	5.72711e+06	-4.70252e+06	3.63834e+07	-2.08821e+07	1.55013e+07	3.51781e+07	-2.00684e+07	1.51097e+07	4.58307e+07	-2.58023e+07	2.00284e+07				-1.21998e+08	-6.25241e+07	-7.81256e+07	-8.00485e+07			-3.7664e+06	1.5219e+07	1.4244e+07	1.84962e+07	-1.21062e+08	-6.28064e+07	-7.89912e+07	-8.15806e+07
2089	524992	-8.59177e+07	-1.4206e+07	-1.98964e+07	-1.19495e+08	9.46021e+06	-7.73849e+07	2.69578e+06	-1.43378e+07	-7.95667e+07	0	-8.17966e+07	0	-1.28725e+07	-9.46692e+07	-7.37269e+06	-8.70252e+07	3.31669e+06	-1.07886e+07	-1.0187e+08	-9.80499e+06	5.3081e+06	-4.49689e+06	3.71428e+07	-2.13351e+07	1.58077e+07	3.56759e+07	-2.03459e+07	1.533e+07	4.6504e+07	-2.61877e+07	2.03163e+07				-1.23992e+08	-6.3759e+07	-7.93391e+07	-8.15536e+07			-3.58492e+06	1.54545e+07	1.44018e+07	1.87092e+07	-1.2308e+08	-6.41121e+07	-8.02673e+07	-8.31607e+07
2090	-79106	-8.70351e+07	-1.39316e+07	-2.04902e+07	-1.21536e+08	9.69123e+06	-7.8146e+07	2.87802e+06	-1.49818e+07	-8.05586e+07	0	-8.24976e+07	0	-1.35924e+07	-9.609e+07	-7.25735e+06	-8.76703e+07	3.51388e+06	-1.15911e+07	-1.03005e+08	-9.15341e+06	4.87375e+06	-4.27966e+06	3.74097e+07	-2.14584e+07	1.59513e+07	3.62008e+07	-2.06407e+07	1.55601e+07	4.66847e+07	-2.62443e+07	2.04404e+07				-1.25816e+08	-6.46073e+07	-8.05299e+07	-8.25645e+07			-3.39527e+06	1.55446e+07	1.45678e+07	1.87767e+07	-1.24931e+08	-6.50139e+07	-8.15222e+07	-8.42282e+07
2091	-751352	-8.81018e+07	-1.36592e+07	-2.10832e+07	-1.23595e+08	9.89514e+06	-7.8896e+07	3.06105e+06	-1.56245e+07	-8.15642e+07	0	-8.3184e+07	0	-1.43105e+07	-9.74945e+07	-7.44199e+06	-8.82881e+07	3.70491e+06	-1.23912e+07	-1.04416e+08	-8.12723e+06	4.19377e+06	-3.93347e+06	3.83015e+07	-2.1995e+07	1.63065e+07	3.67526e+07	-2.09526e+07	1.57999e+07	4.74393e+07	-2.66804e+07	2.07588e+07				-1.27529e+08	-6.52577e+07	-8.16945e+07	-8.36575e+07			-3.09467e+06	1.58196e+07	1.47418e+07	1.90139e+07	-1.2669e+08	-6.57446e+07	-8.27526e+07	-8.54025e+07
2092	-1.36332e+06	-8.85254e+07	-1.46669e+07	-2.23243e+07	-1.2688e+08	1.01094e+07	-7.96349e+07	2.89773e+06	-1.62658e+07	-8.28936e+07	0	-8.38562e+07	0	-1.50268e+07	-9.8883e+07	-7.63044e+06	-8.888e+07	3.54965e+06	-1.3189e+07	-1.0615e+08	-7.07415e+06	3.49945e+06	-3.5747e+06	3.92203e+07	-2.25499e+07	1.66704e+07	3.73313e+07	-2.12818e+07	1.60496e+07	4.81935e+07	-2.71171e+07	2.10764e+07				-1.30455e+08	-6.62231e+07	-8.28334e+07	-8.50733e+07			-2.7858e+06	1.61028e+07	1.4924e+07	1.92512e+07	-1.29666e+08	-6.67908e+07	-8.3959e+07	-8.68985e+07
2093	-911179	-8.88904e+07	-1.56707e+07	-2.35618e+07	-1.29034e+08	1.00828e+07	-8.04004e+07	2.74109e+06	-1.68901e+07	-8.44667e+07	0	-8.45103e+07	0	-1.57433e+07	-1.00254e+08	-7.53541e+06	-8.94848e+07	3.40113e+06	-1.39689e+07	-1.07588e+08	-8.90352e+06	4.7198e+06	-4.18372e+06	3.96466e+07	-2.27752e+07	1.68714e+07	3.79371e+07	-2.1628e+07	1.63091e+07	4.84553e+07	-2.72251e+07	2.12302e+07				-1.33218e+08	-6.75953e+07	-8.39445e+07	-8.63577e+07			-3.32877e+06	1.62407e+07	1.51144e+07	1.93431e+07	-1.32363e+08	-6.8226e+07	-8.51392e+07	-8.82448e+07
2094	-387757	-8.92123e+07	-1.6661e+07	-2.47907e+07	-1.31052e+08	1.00117e+07	-8.11642e+07	2.93113e+06	-1.75133e+07	-8.57347e+07	0	-8.5154e+07	0	-1.64582e+07	-1.01612e+08	-7.4392e+06	-9.00755e+07	3.59236e+06	-1.47466e+07	-1.08669e+08	-1.07058e+07	5.91863e+06	-4.78718e+06	4.01879e+07	-2.30754e+07	1.71125e+07	3.85625e+07	-2.19863e+07	1.65762e+07	4.88321e+07	-2.74088e+07	2.14233e+07				-1.35839e+08	-6.86222e+07	-8.50361e+07	-8.72457e+07			-3.86431e+06	1.64127e+07	1.53107e+07	1.94691e+07	-1.34916e+08	-6.9322e+07	-8.63015e+07	-8.91998e+07
2095	188367	-8.87564e+07	-1.76404e+07	-2.60123e+07	-1.32221e+08	9.9155e+06	-8.11808e+07	2.77773e+06	-1.81351e+07	-8.66227e+07	0	-8.50432e+07	0	-1.71715e+07	-1.02215e+08	-7.61138e+06	-8.99079e+07	3.44022e+06	-1.55224e+07	-1.09601e+08	-1.2481e+07	7.08085e+06	-5.40019e+06	4.12756e+07	-2.37388e+07	1.75368e+07	3.92148e+07	-2.23616e+07	1.68533e+07	4.97281e+07	-2.79384e+07	2.17896e+07				-1.37621e+08	-6.90859e+07	-8.53614e+07	-8.78118e+07			-4.3924e+06	1.67464e+07	1.55152e+07	1.97488e+07	-1.36613e+08	-6.98763e+07	-8.66994e+07	-8.98527e+07
2096	800959	-8.81907e+07	-1.8611e+07	-2.72278e+07	-1.33229e+08	9.79678e+06	-8.11104e+07	2.62349e+06	-1.87558e+07	-8.74459e+07	0	-8.4837e+07	0	-1.78831e+07	-1.0272e+08	-7.50259e+06	-8.96414e+07	3.29427e+06	-1.62961e+07	-1.10146e+08	-1.42292e+07	8.21025e+06	-6.01895e+06	4.18708e+07	-2.40747e+07	1.77961e+07	3.98941e+07	-2.27539e+07	1.71403e+07	5.01316e+07	-2.81415e+07	2.19901e+07				-1.39247e+08	-6.96499e+07	-8.55799e+07	-8.81557e+07			-4.91304e+06	1.69348e+07	1.57279e+07	1.98831e+07	-1.38142e+08	-7.05111e+07	-8.69923e+07	-9.02628e+07
2097	1.43567e+06	-8.75334e+07	-1.95743e+07	-2.8438e+07	-1.3411e+08	9.65863e+06	-8.09592e+07	2.81552e+06	-1.93753e+07	-8.78603e+07	0	-8.45464e+07	0	-1.85932e+07	-1.0314e+08	-7.39462e+06	-8.92872e+07	3.48766e+06	-1.70679e+07	-1.10262e+08	-1.59503e+07	9.30983e+06	-6.64048e+06	4.2493e+07	-2.4426e+07	1.8067e+07	4.06004e+07	-2.31631e+07	1.74374e+07	5.05893e+07	-2.83788e+07	2.22105e+07				-1.40751e+08	-6.97933e+07	-8.57023e+07	-8.80514e+07			-5.42622e+06	1.71314e+07	1.59488e+07	2.00335e+07	-1.39536e+08	-7.0729e+07	-8.71909e+07	-9.02285e+07
2098	2.15695e+06	-8.75048e+07	-2.05315e+07	-2.96437e+07	-1.35523e+08	9.60058e+06	-8.14798e+07	2.98079e+06	-1.99937e+07	-8.88921e+07	0	-8.49251e+07	0	-1.93019e+07	-1.04227e+08	-7.55757e+06	-8.95574e+07	3.68146e+06	-1.78553e+07	-1.11289e+08	-1.76444e+07	1.03818e+07	-7.26252e+06	4.36616e+07	-2.51397e+07	1.85219e+07	4.13337e+07	-2.35892e+07	1.77445e+07	5.15662e+07	-2.89613e+07	2.26049e+07				-1.42786e+08	-7.03702e+07	-8.64824e+07	-8.86839e+07			-5.93192e+06	1.74897e+07	1.61778e+07	2.03376e+07	-1.41455e+08	-7.14024e+07	-8.80492e+07	-9.09513e+07
2099	2.95534e+06	-8.74591e+07	-2.14837e+07	-3.08452e+07	-1.36833e+08	9.62684e+06	-8.20207e+07	2.7994e+06	-2.0611e+07	-9.02054e+07	0	-8.53224e+07	0	-2.0009e+07	-1.05331e+08	-7.73976e+06	-8.98376e+07	3.53563e+06	-1.86409e+07	-1.12683e+08	-1.93114e+07	1.14281e+07	-7.88329e+06	4.47514e+07	-2.57999e+07	1.89515e+07	4.20939e+07	-2.40321e+07	1.80618e+07	5.2502e+07	-2.95158e+07	2.29861e+07				-1.44716e+08	-7.12539e+07	-8.72696e+07	-8.96965e+07			-6.43015e+06	1.78251e+07	1.6415e+07	2.06298e+07	-1.43263e+08	-7.23804e+07	-8.89164e+07	-9.20529e+07
2100	3.8223e+06	-8.73973e+07	-2.24317e+07	-3.20431e+07	-1.3805e+08	9.83283e+06	-8.25777e+07	2.98159e+06	-2.12272e+07	-9.09905e+07	0	-8.57348e+07	0	-2.07147e+07	-1.0645e+08	-7.6573e+06	-9.01254e+07	3.72628e+06	-1.94247e+07	-1.13481e+08	-2.09513e+07	1.24499e+07	-8.5014e+06	4.53488e+07	-2.61299e+07	1.92188e+07	4.28811e+07	-2.44918e+07	1.83893e+07	5.29726e+07	-2.97589e+07	2.32136e+07				-1.46551e+08	-7.17717e+07	-8.80602e+07	-9.02675e+07			-6.92088e+06	1.80152e+07	1.66604e+07	2.07847e+07	-1.44971e+08	-7.29753e+07	-8.97891e+07	-9.26965e+07
2101	4.75013e+06	-8.73208e+07	-2.33758e+07	-3.32376e+07	-1.39184e+08	1.00145e+07	-8.31478e+07	3.16469e+06	-2.18423e+07	-9.18109e+07	0	-8.6162e+07	0	-2.14191e+07	-1.07581e+08	-7.84237e+06	-9.04195e+07	3.91791e+06	-2.02067e+07	-1.14551e+08	-2.25643e+07	1.34485e+07	-9.11575e+06	4.65709e+07	-2.68725e+07	1.96985e+07	4.36953e+07	-2.49682e+07	1.8727e+07	5.39622e+07	-3.03448e+07	2.36174e+07				-1.483e+08	-7.21124e+07	-8.88541e+07	-9.09333e+07			-7.40413e+06	1.83902e+07	1.6914e+07	2.10932e+07	-1.46588e+08	-7.34207e+07	-9.06671e+07	-9.34575e+07
2102	5.73189e+06	-8.72312e+07	-2.43167e+07	-3.44291e+07	-1.40245e+08	1.02101e+07	-8.37242e+07	3.00157e+06	-2.24565e+07	-9.2969e+07	0	-8.65958e+07	0	-2.21221e+07	-1.08718e+08	-8.04384e+06	-9.07166e+07	3.77036e+06	-2.0987e+07	-1.15977e+08	-2.41502e+07	1.44247e+07	-9.72549e+06	4.782e+07	-2.76326e+07	2.01874e+07	4.45364e+07	-2.54614e+07	1.9075e+07	5.49788e+07	-3.09489e+07	2.40299e+07				-1.49971e+08	-7.27816e+07	-8.96429e+07	-9.19472e+07			-7.87987e+06	1.87735e+07	1.71759e+07	2.14101e+07	-1.48125e+08	-7.41955e+07	-9.1542e+07	-9.4567e+07
2103	6.75771e+06	-8.71301e+07	-2.52547e+07	-3.56178e+07	-1.41245e+08	1.01667e+07	-8.43072e+07	2.84509e+06	-2.30697e+07	-9.43652e+07	0	-8.70366e+07	0	-2.28238e+07	-1.0986e+08	-7.97819e+06	-9.1018e+07	3.61554e+06	-2.17657e+07	-1.17146e+08	-2.57091e+07	1.53791e+07	-1.03299e+07	4.85767e+07	-2.80627e+07	2.05141e+07	4.54044e+07	-2.59712e+07	1.94332e+07	5.55303e+07	-3.12422e+07	2.42882e+07				-1.51575e+08	-7.38511e+07	-9.04271e+07	-9.28581e+07			-8.3481e+06	1.90116e+07	1.74459e+07	2.15896e+07	-1.49593e+08	-7.53535e+07	-9.24144e+07	-9.55566e+07
2104	7.82187e+06	-8.70191e+07	-2.61901e+07	-3.68038e+07	-1.42191e+08	1.00812e+07	-8.48953e+07	3.03539e+06	-2.36819e+07	-9.54607e+07	0	-8.74829e+07	0	-2.35242e+07	-1.11007e+08	-7.87749e+06	-9.13231e+07	3.80755e+06	-2.25427e+07	-1.17936e+08	-2.72409e+07	1.63124e+07	-1.09285e+07	4.93876e+07	-2.85266e+07	2.0861e+07	4.62994e+07	-2.64976e+07	1.98018e+07	5.60816e+07	-3.15342e+07	2.45474e+07				-1.5312e+08	-7.45997e+07	-9.12052e+07	-9.33883e+07			-8.80882e+06	1.9266e+07	1.77242e+07	2.17693e+07	-1.51e+08	-7.61946e+07	-9.32828e+07	-9.61664e+07
2105	8.91921e+06	-8.68996e+07	-2.71231e+07	-3.79873e+07	-1.43091e+08	9.97207e+06	-8.54873e+07	2.88232e+06	-2.42932e+07	-9.69261e+07	0	-8.79336e+07	0	-2.42233e+07	-1.12157e+08	-8.05783e+06	-9.16316e+07	3.66325e+06	-2.33181e+07	-1.19344e+08	-2.87457e+07	1.7225e+07	-1.15208e+07	5.07448e+07	-2.93535e+07	2.13913e+07	4.72214e+07	-2.70406e+07	2.01808e+07	5.71791e+07	-3.21899e+07	2.49891e+07				-1.54611e+08	-7.55348e+07	-9.19762e+07	-9.43552e+07			-9.26201e+06	1.96822e+07	1.80108e+07	2.21107e+07	-1.52353e+08	-7.72439e+07	-9.41462e+07	-9.72336e+07
2106	1.00451e+07	-8.67733e+07	-2.80538e+07	-3.91684e+07	-1.43951e+08	9.84166e+06	-8.60825e+07	2.72835e+06	-2.49037e+07	-9.84162e+07	0	-8.83883e+07	0	-2.49213e+07	-1.1331e+08	-7.97364e+06	-9.19458e+07	3.51111e+06	-2.4092e+07	-1.205e+08	-3.02235e+07	1.81172e+07	-1.21064e+07	5.16096e+07	-2.98529e+07	2.17567e+07	4.81703e+07	-2.76001e+07	2.05702e+07	5.78115e+07	-3.25375e+07	2.5274e+07				-1.56057e+08	-7.66594e+07	-9.27395e+07	-9.52264e+07			-9.70766e+06	1.99531e+07	1.83055e+07	2.23148e+07	-1.53658e+08	-7.8463e+07	-9.50041e+07	-9.81856e+07
2107	1.11953e+07	-8.72231e+07	-2.77051e+07	-3.97119e+07	-1.43445e+08	9.69196e+06	-8.66775e+07	2.92071e+06	-2.55132e+07	-9.9578e+07	0	-8.88444e+07	0	-2.56181e+07	-1.14463e+08	-7.85653e+06	-9.22616e+07	3.70537e+06	-2.48644e+07	-1.21277e+08	-3.16743e+07	1.89893e+07	-1.2685e+07	5.25014e+07	-3.03674e+07	2.2134e+07	4.91462e+07	-2.81761e+07	2.09701e+07	5.84436e+07	-3.2883e+07	2.55606e+07				-1.5613e+08	-7.74441e+07	-9.34925e+07	-9.57166e+07			-1.01458e+07	2.02323e+07	1.86086e+07	2.25191e+07	-1.53591e+08	-7.93457e+07	-9.5854e+07	-9.87581e+07
2108	1.12137e+07	-8.78076e+07	-2.736e+07	-4.02561e+07	-1.4421e+08	9.62316e+06	-8.72732e+07	3.08635e+06	-2.6122e+07	-1.00686e+08	0	-8.93031e+07	0	-2.63138e+07	-1.15617e+08	-8.02224e+06	-9.25801e+07	3.90707e+06	-2.56354e+07	-1.22331e+08	-3.02116e+07	1.79289e+07	-1.22826e+07	5.39394e+07	-3.12443e+07	2.26951e+07	5.0149e+07	-2.87686e+07	2.13804e+07	5.9622e+07	-3.35917e+07	2.60302e+07				-1.56493e+08	-7.79906e+07	-9.42365e+07	-9.63004e+07			-9.72265e+06	2.06733e+07	1.89199e+07	2.28851e+07	-1.53933e+08	-8.00124e+07	-9.6697e+07	-9.94456e+07
2109	1.09849e+07	-8.85111e+07	-2.70284e+07	-4.08058e+07	-1.4536e+08	9.63945e+06	-8.78692e+07	2.90531e+06	-2.673e+07	-1.02054e+08	0	-8.97637e+07	0	-2.70084e+07	-1.16772e+08	-8.22466e+06	-9.29012e+07	3.76212e+06	-2.64049e+07	-1.23769e+08	-2.87219e+07	1.68572e+07	-1.18647e+07	5.52987e+07	-3.20675e+07	2.32312e+07	5.11788e+07	-2.93776e+07	2.18012e+07	6.08545e+07	-3.43358e+07	2.65187e+07				-1.57225e+08	-7.88233e+07	-9.49709e+07	-9.72499e+07			-9.29111e+06	2.10915e+07	1.92394e+07	2.32675e+07	-1.54652e+08	-8.0963e+07	-9.75327e+07	-1.00501e+08
2110	1.05412e+07	-8.92497e+07	-2.67714e+07	-4.13921e+07	-1.46872e+08	9.83654e+06	-8.84655e+07	3.08784e+06	-2.73372e+07	-1.02878e+08	0	-9.02266e+07	0	-2.77019e+07	-1.17929e+08	-8.14571e+06	-9.3225e+07	3.95365e+06	-2.7173e+07	-1.2459e+08	-2.72054e+07	1.57892e+07	-1.14161e+07	5.61656e+07	-3.25603e+07	2.36053e+07	5.22355e+07	-3.00029e+07	2.22326e+07	6.15948e+07	-3.475e+07	2.68448e+07				-1.58288e+08	-7.92731e+07	-9.5696e+07	-9.77453e+07			-8.85116e+06	2.13644e+07	1.95673e+07	2.35046e+07	-1.55723e+08	-8.1514e+07	-9.83613e+07	-1.01085e+08
2111	1.00411e+07	-9.00795e+07	-2.65233e+07	-4.19817e+07	-1.48543e+08	1.00104e+07	-8.90617e+07	3.27134e+06	-2.79437e+07	-1.03724e+08	0	-9.06913e+07	0	-2.83944e+07	-1.19086e+08	-8.33218e+06	-9.35512e+07	4.1532e+06	-2.79399e+07	-1.2567e+08	-2.60351e+07	1.49684e+07	-1.10667e+07	5.76572e+07	-3.34654e+07	2.41918e+07	5.33192e+07	-3.06446e+07	2.26745e+07	6.2854e+07	-3.55061e+07	2.73479e+07				-1.5961e+08	-7.95318e+07	-9.64112e+07	-9.83222e+07			-8.51317e+06	2.18224e+07	1.99034e+07	2.38954e+07	-1.57057e+08	-8.19013e+07	-9.91824e+07	-1.01775e+08
2112	9.36971e+06	-9.0915e+07	-2.62826e+07	-4.2574e+07	-1.50402e+08	1.01992e+07	-8.90348e+07	3.10856e+06	-2.92438e+07	-1.04971e+08	0	-9.11546e+07	0	-2.9086e+07	-1.20241e+08	-8.55245e+06	-9.38776e+07	4.00654e+06	-2.87054e+07	-1.27129e+08	-2.4838e+07	1.41433e+07	-1.06947e+07	5.91757e+07	-3.43878e+07	2.47879e+07	5.44298e+07	-3.13027e+07	2.31271e+07	6.41674e+07	-3.62979e+07	2.78695e+07				-1.61097e+08	-8.01829e+07	-9.71134e+07	-9.92595e+07			-8.16687e+06	2.22887e+07	2.02478e+07	2.43027e+07	-1.58569e+08	-8.26821e+07	-9.99927e+07	-1.02826e+08
2113	8.68873e+06	-9.17498e+07	-2.60482e+07	-4.31684e+07	-1.52278e+08	1.02499e+07	-8.89256e+07	2.95243e+06	-3.05402e+07	-1.06264e+08	0	-9.16189e+07	0	-2.97765e+07	-1.21395e+08	-8.48891e+06	-9.42067e+07	3.8526e+06	-2.94696e+07	-1.28313e+08	-2.36139e+07	1.33098e+07	-1.03041e+07	5.91543e+07	-3.42856e+07	2.48686e+07	5.55673e+07	-3.1977e+07	2.35903e+07	6.49885e+07	-3.67602e+07	2.82283e+07				-1.62582e+08	-8.13949e+07	-9.78051e+07	-1.00084e+08			-7.81224e+06	2.23001e+07	2.06005e+07	2.45647e+07	-1.6009e+08	-8.39634e+07	-1.00795e+08	-1.03748e+08
2114	8.00955e+06	-9.25775e+07	-2.58191e+07	-4.37644e+07	-1.54151e+08	1.02852e+07	-8.87428e+07	3.14308e+06	-3.18276e+07	-1.07142e+08	0	-9.20835e+07	0	-3.04662e+07	-1.2255e+08	-8.38791e+06	-9.4538e+07	4.04551e+06	-3.02327e+07	-1.29113e+08	-2.2363e+07	1.24669e+07	-9.89605e+06	5.91871e+07	-3.42201e+07	2.4967e+07	5.67318e+07	-3.26677e+07	2.40642e+07	6.58094e+07	-3.72206e+07	2.85888e+07				-1.64047e+08	-8.21752e+07	-9.84856e+07	-1.00524e+08			-7.44927e+06	2.23274e+07	2.09616e+07	2.48269e+07	-1.61601e+08	-8.48147e+07	-1.01588e+08	-1.04286e+08
2115	7.34245e+06	-9.33926e+07	-2.55945e+07	-4.43618e+07	-1.56006e+08	1.0469e+07	-8.84937e+07	2.99035e+06	-3.31075e+07	-1.08142e+08	0	-9.25482e+07	0	-3.1155e+07	-1.23703e+08	-8.56868e+06	-9.48712e+07	3.9021e+06	-3.09946e+07	-1.30532e+08	-2.10851e+07	1.16134e+07	-9.47171e+06	5.97661e+07	-3.45256e+07	2.52405e+07	5.79233e+07	-3.33746e+07	2.45487e+07	6.71764e+07	-3.80443e+07	2.9132e+07				-1.65478e+08	-8.29014e+07	-9.91545e+07	-1.014e+08			-7.07797e+06	2.25163e+07	2.13309e+07	2.52509e+07	-1.63084e+08	-8.56256e+07	-1.02372e+08	-1.05281e+08
2116	6.6967e+06	-9.41487e+07	-2.53739e+07	-4.49602e+07	-1.57786e+08	1.06607e+07	-8.81432e+07	2.83671e+06	-3.43811e+07	-1.09027e+08	0	-9.29708e+07	0	-3.18429e+07	-1.24814e+08	-8.48263e+06	-9.51641e+07	3.75085e+06	-3.17553e+07	-1.31651e+08	-1.97803e+07	1.07485e+07	-9.03177e+06	5.98528e+07	-3.45103e+07	2.53425e+07	5.91417e+07	-3.40977e+07	2.5044e+07	6.80783e+07	-3.85594e+07	2.95189e+07				-1.66818e+08	-8.36843e+07	-9.97697e+07	-1.02132e+08			-6.69831e+06	2.25598e+07	2.17086e+07	2.55377e+07	-1.64484e+08	-8.6467e+07	-1.03105e+08	-1.06113e+08
2117	6.0807e+06	-9.49171e+07	-2.5157e+07	-4.55596e+07	-1.59553e+08	1.08591e+07	-8.83417e+07	3.0294e+06	-3.49711e+07	-1.09424e+08	0	-9.33834e+07	0	-3.253e+07	-1.25913e+08	-8.36172e+06	-9.54496e+07	3.946e+06	-3.25149e+07	-1.3238e+08	-1.84486e+07	9.87178e+06	-8.57681e+06	5.99665e+07	-3.45156e+07	2.54509e+07	6.0387e+07	-3.4837e+07	2.555e+07	6.89801e+07	-3.90722e+07	2.99079e+07				-1.6813e+08	-8.39734e+07	-1.00363e+08	-1.02472e+08			-6.31029e+06	2.26113e+07	2.20946e+07	2.58248e+07	-1.65863e+08	-8.6813e+07	-1.03819e+08	-1.06555e+08
2118	5.42479e+06	-9.5696e+07	-2.49433e+07	-4.61598e+07	-1.61374e+08	1.08133e+07	-8.85696e+07	3.19538e+06	-3.55593e+07	-1.1012e+08	0	-9.37899e+07	0	-3.32163e+07	-1.27006e+08	-8.52387e+06	-9.57313e+07	4.14859e+06	-3.32735e+07	-1.3338e+08	-1.709e+07	8.98274e+06	-8.10723e+06	6.16495e+07	-3.5566e+07	2.60835e+07	6.16593e+07	-3.55924e+07	2.60668e+07	7.04279e+07	-3.99477e+07	3.04802e+07				-1.69482e+08	-8.40367e+07	-1.00939e+08	-1.029e+08			-5.91391e+06	2.3127e+07	2.24889e+07	2.62736e+07	-1.67288e+08	-8.69932e+07	-1.04517e+08	-1.07106e+08
2119	4.73387e+06	-9.65248e+07	-2.47326e+07	-4.67608e+07	-1.63284e+08	1.08147e+07	-8.88646e+07	3.01466e+06	-3.61515e+07	-1.11187e+08	0	-9.42322e+07	0	-3.39019e+07	-1.28134e+08	-8.7222e+06	-9.60512e+07	4.00452e+06	-3.40311e+07	-1.348e+08	-1.57044e+07	8.08107e+06	-7.62337e+06	6.32537e+07	-3.65637e+07	2.669e+07	6.29585e+07	-3.63641e+07	2.65944e+07	7.19299e+07	-4.08582e+07	3.10717e+07				-1.70908e+08	-8.44968e+07	-1.0154e+08	-1.03728e+08			-5.50915e+06	2.36199e+07	2.28916e+07	2.67389e+07	-1.68793e+08	-8.75668e+07	-1.05242e+08	-1.08061e+08
2120	4.01242e+06	-9.73656e+07	-2.45247e+07	-4.73623e+07	-1.6524e+08	1.08137e+07	-8.91877e+07	3.19751e+06	-3.67468e+07	-1.11923e+08	0	-9.46745e+07	0	-3.45868e+07	-1.29261e+08	-8.63759e+06	-9.63738e+07	4.19694e+06	-3.47876e+07	-1.35602e+08	-1.4292e+07	7.16653e+06	-7.12547e+06	6.43657e+07	-3.72263e+07	2.71394e+07	6.42846e+07	-3.71518e+07	2.71329e+07	7.29397e+07	-4.14385e+07	3.15012e+07				-1.72366e+08	-8.47839e+07	-1.02128e+08	-1.04101e+08			-5.09602e+06	2.39677e+07	2.33027e+07	2.7059e+07	-1.70336e+08	-8.79555e+07	-1.05959e+08	-1.08543e+08
2121	3.2645e+06	-9.82174e+07	-2.43085e+07	-4.79645e+07	-1.67226e+08	1.07502e+07	-8.95372e+07	3.28834e+06	-3.73443e+07	-1.12843e+08	0	-9.5118e+07	0	-3.5271e+07	-1.30389e+08	-8.81898e+06	-9.67001e+07	4.2898e+06	-3.55432e+07	-1.36773e+08	-1.28526e+07	6.6535e+06	-6.19914e+06	6.61022e+07	-3.76532e+07	2.84491e+07	6.56377e+07	-3.74286e+07	2.82091e+07	7.44684e+07	-4.17645e+07	3.27039e+07				-1.73425e+08	-8.43939e+07	-1.0218e+08	-1.04069e+08			-5.09602e+06	2.39677e+07	2.33027e+07	2.7059e+07	-1.72322e+08	-8.88752e+07	-1.07086e+08	-1.09713e+08
2122	2.49378e+06	-9.90759e+07	-2.4095e+07	-4.85672e+07	-1.69244e+08	1.06665e+07	-8.99102e+07	3.19107e+06	-3.79435e+07	-1.13996e+08	0	-9.5551e+07	0	-3.5968e+07	-1.31519e+08	-9.03388e+06	-9.70264e+07	4.1945e+06	-3.6298e+07	-1.38164e+08	-1.13864e+07	6.13804e+06	-5.24834e+06	6.78657e+07	-3.80832e+07	2.97825e+07	6.70178e+07	-3.77109e+07	2.93069e+07	7.60512e+07	-4.21066e+07	3.39446e+07				-1.74493e+08	-8.42137e+07	-1.02212e+08	-1.04219e+08			-5.09602e+06	2.39677e+07	2.33027e+07	2.7059e+07	-1.7434e+08	-9.00284e+07	-1.08216e+08	-1.11105e+08
																																			Comparing Rot35 with others:		2.07202	1.70716	1.67429
																																			35yr low expansion:	-1.28062e+08	-4.55004e+07	-6.04849e+07	-6.06931e+07
																																			Comparing with 50yrlow expansion:	0.266092	0.459703	0.408241	0.417639
																																				-4.64311e+07	-3.87132e+07	-4.17272e+07	-4.35259e+07
																																			50yr high expansion:	-2.77243e+08	-1.3618e+08	-1.77207e+08	-1.79957e+08
																																			Comparing high and low:	1.58885	1.61708	1.73372	1.72671
																																			Comparing Rot35 with others:		2.03585	1.56451	1.54061
																																			35yr high expansion:	-2.07065e+08	-1.02313e+08	-1.16437e+08	-1.15589e+08
																																			Comparing with 50yrlow expansion:	0.253128	0.248696	0.342932	0.357683
																																				-7.01777e+07	-3.38675e+07	-6.077e+07	-6.43674e+07

## Sheet: Total_impact_hi (Aff35yrs)
Marginal impact results for high wood demand projection, all scenarios with 35-year afforestation duration																					Forest ecosystem C impact per tC harvested:		xxx
Units Mg CO2e
	Marginal domestic supply impact (HWP - existing forest + Aff_hi)																				Hi_projection Marginal import impact - demand for IRW met by increased harvest elsewhere															Hi_projection Net impact (not including Marginal import Forest C)						Increased use of concrete - demand for IRW not met				Net impact
	50_35 + Aff35_hi					50_45 + Aff45_hi					50_50 + Aff50_hi					50_55 + Aff55_hi					50_35 + Aff35_hi			50_45 + Aff45_hi			50_50 + Aff50_hi			50_55 + Aff55_hi			reference			50_35 + Aff35_hi	50_45 + Aff45_hi	50_50 + Aff50_hi	50_55 + Aff55_hi	Reference		50_35 + Aff35_hi	50_45 + Aff45_hi	50_50 + Aff50_hi	50_55 + Aff55_hi	50_35 + Aff35_hi	50_45 + Aff45_hi	50_50 + Aff50_hi	50_55 + Aff55_hi
	Ecosystem C		HWP		Total	Ecosystem C		HWP		Total	Ecosystem C		HWP		Total	Ecosystem C		HWP		Total	Ecosystem C	HWP	Total	Ecosystem C	HWP	Total	Ecosystem C	HWP	Total	Ecosystem C	HWP	Total	Ecosystem C	HWP	Total
	Existing forest C	New forest C	Existing forest HWP	New forest HWP		Existing forest	New forest	Existing forest	New forest		Existing forest	New forest	Existing forest	New forest		Existing forest	New forest	Existing forest	New forest
2023	0	-596630	0	0	-596630	267411	-592896	303742	0	-21743.2	0	-592896	0	0	-592896	0	-592896	303742	0	-289154	0	0	0	0	0	0	0	0	0	0	0	0	0	0	0	-596630	-21743.2	-592896	-289154	0		0	0	0	0	-596630	-21743.2	-592896	-289154
2024	-6736.99	-1.20374e+06	0	0	-1.21048e+06	556483	-1.18704e+06	298641	0	-331915	0	-1.18704e+06	0	0	-1.18704e+06	-273429	-1.18704e+06	298641	0	-1.16183e+06	60413.5	-36752.4	23661.1	559703	-340494	219209	60413.5	-36752.4	23661.1	559703	-340494	219209	60413.5	-36752.4	23661.1	-1.18682e+06	-112706	-1.16338e+06	-942619	23661.1		-23974.1	-222109	-23974.1	-222109	-1.23446e+06	-554024	-1.21101e+06	-1.38394e+06
2025	-23742.5	-1.82875e+06	0	0	-1.85249e+06	862466	-1.78534e+06	291102	0	-631768	0	-1.78534e+06	0	0	-1.78534e+06	-301540	-1.78534e+06	291102	0	-1.79577e+06	177116	-110505	66610.6	653557	-409146	244410	177116	-110505	66610.6	653557	-409146	244410	177116	-110505	66610.6	-1.78588e+06	-387358	-1.71873e+06	-1.55136e+06	66610.6		-72431.3	-270108	-72431.3	-270108	-1.92492e+06	-901877	-1.85777e+06	-2.06588e+06
2026	-54067	-2.47878e+06	0	0	-2.53285e+06	1.18129e+06	-2.39106e+06	595115	0	-614661	0	-2.39106e+06	0	0	-2.39106e+06	-325277	-2.39106e+06	595115	0	-2.12122e+06	350107	-221217	128890	809648	-512319	297330	350107	-221217	128890	809648	-512319	297330	350107	-221217	128890	-2.40396e+06	-317332	-2.26217e+06	-1.8239e+06	128890		-145880	-343000	-145880	-343000	-2.67873e+06	-957662	-2.53694e+06	-2.46423e+06
2027	-100329	-3.16069e+06	0	0	-3.26102e+06	1.50977e+06	-3.00778e+06	584932	0	-913074	0	-3.00778e+06	0	0	-3.00778e+06	-623235	-3.00778e+06	584932	0	-3.04608e+06	579387	-368926	210461	1.51452e+06	-964041	550475	579387	-368926	210461	1.51452e+06	-964041	550475	579387	-368926	210461	-3.05056e+06	-362599	-2.79732e+06	-2.49561e+06	210461		-244830	-644093	-244830	-644093	-3.50585e+06	-1.55717e+06	-3.25261e+06	-3.69018e+06
2028	-164733	-3.88101e+06	0	0	-4.04574e+06	1.60724e+06	-3.63925e+06	569096	0	-1.46292e+06	0	-3.63925e+06	0	0	-3.63925e+06	-668048	-3.63925e+06	569096	0	-3.7382e+06	864955	-550291	314665	1.77517e+06	-1.1316e+06	643566	864955	-550291	314665	1.77517e+06	-1.1316e+06	643566	864955	-550291	314665	-3.73108e+06	-819351	-3.32458e+06	-3.09464e+06	314665		-366351	-761694	-366351	-761694	-4.41209e+06	-2.22461e+06	-4.0056e+06	-4.4999e+06
2029	-249084	-4.64589e+06	0	0	-4.89498e+06	1.68858e+06	-4.28938e+06	869109	0	-1.7317e+06	0	-4.28938e+06	0	0	-4.28938e+06	-705614	-4.28938e+06	869109	0	-4.12589e+06	1.20681e+06	-767522	439291	2.09352e+06	-1.333e+06	760521	1.20681e+06	-767522	439291	2.09352e+06	-1.333e+06	760521	1.20681e+06	-767522	439291	-4.45569e+06	-971178	-3.85009e+06	-3.36537e+06	439291		-513014	-904339	-513014	-904339	-5.40799e+06	-2.63604e+06	-4.8024e+06	-5.03023e+06
2030	-354807	-5.46113e+06	0	0	-5.81593e+06	1.75575e+06	-4.96219e+06	849121	0	-2.35732e+06	0	-4.96219e+06	0	0	-4.96219e+06	-1.01981e+06	-4.96219e+06	849121	0	-5.13288e+06	1.60496e+06	-1.01894e+06	586017	2.96312e+06	-1.88265e+06	1.08046e+06	1.60496e+06	-1.01894e+06	586017	2.96312e+06	-1.88265e+06	1.08046e+06	1.60496e+06	-1.01894e+06	586017	-5.22992e+06	-1.27686e+06	-4.37617e+06	-4.05241e+06	586017		-680224	-1.26657e+06	-680224	-1.26657e+06	-6.49616e+06	-3.62389e+06	-5.64241e+06	-6.39945e+06
2031	-482969	-6.3321e+06	0	0	-6.81507e+06	1.81033e+06	-5.66172e+06	827254	0	-3.02413e+06	0	-5.66172e+06	0	0	-5.66172e+06	-1.07394e+06	-5.66172e+06	827254	0	-5.9084e+06	2.05939e+06	-1.30587e+06	753527	3.38535e+06	-2.14959e+06	1.23576e+06	2.05939e+06	-1.30587e+06	753527	3.38535e+06	-2.14959e+06	1.23576e+06	2.05939e+06	-1.30587e+06	753527	-6.06154e+06	-1.78837e+06	-4.90819e+06	-4.67265e+06	753527		-872342	-1.45282e+06	-872342	-1.45282e+06	-7.68741e+06	-4.47696e+06	-6.53406e+06	-7.36123e+06
2032	-634319	-7.2638e+06	0	0	-7.89812e+06	1.85358e+06	-6.39201e+06	1.12564e+06	0	-3.41279e+06	0	-6.39201e+06	0	0	-6.39201e+06	-1.1187e+06	-6.39201e+06	1.12564e+06	0	-6.38507e+06	2.57012e+06	-1.62829e+06	941832	3.86451e+06	-2.45014e+06	1.41436e+06	2.57012e+06	-1.62829e+06	941832	3.86451e+06	-2.45014e+06	1.41436e+06	2.57012e+06	-1.62829e+06	941832	-6.95628e+06	-1.99843e+06	-5.45018e+06	-4.9707e+06	941832		-1.08962e+06	-1.66411e+06	-1.08962e+06	-1.66411e+06	-8.98774e+06	-5.0769e+06	-7.48163e+06	-8.04917e+06
2033	-809318	-8.26083e+06	0	0	-9.07015e+06	2.15397e+06	-7.15708e+06	1.39752e+06	0	-3.60559e+06	0	-7.15708e+06	0	0	-7.15708e+06	-1.44309e+06	-7.15708e+06	1.39752e+06	0	-7.20266e+06	3.13713e+06	-1.98206e+06	1.15507e+06	4.90122e+06	-3.09997e+06	1.80125e+06	3.13713e+06	-1.98206e+06	1.15507e+06	4.90122e+06	-3.09997e+06	1.80125e+06	3.13713e+06	-1.98206e+06	1.15507e+06	-7.91508e+06	-1.80434e+06	-6.00201e+06	-5.40141e+06	1.15507e+06		-1.32818e+06	-2.0972e+06	-1.32818e+06	-2.0972e+06	-1.03983e+07	-5.70279e+06	-8.48526e+06	-9.29986e+06
2034	-1.00818e+06	-9.32744e+06	0	0	-1.03356e+07	2.46666e+06	-7.96088e+06	1.36028e+06	0	-4.13395e+06	0	-7.96088e+06	0	0	-7.96088e+06	-1.77448e+06	-7.96088e+06	1.36028e+06	0	-8.37509e+06	3.76043e+06	-2.37052e+06	1.38991e+06	5.95498e+06	-3.76032e+06	2.19466e+06	3.76043e+06	-2.37052e+06	1.38991e+06	5.95498e+06	-3.76032e+06	2.19466e+06	3.76043e+06	-2.37052e+06	1.38991e+06	-8.94572e+06	-1.93929e+06	-6.57097e+06	-6.18043e+06	1.38991e+06		-1.59158e+06	-2.54105e+06	-1.59158e+06	-2.54105e+06	-1.19272e+07	-6.675e+06	-9.55246e+06	-1.09161e+07
2035	-1.2309e+06	-1.04675e+07	0	0	-1.16984e+07	2.78765e+06	-8.80724e+06	1.64619e+06	0	-4.3734e+06	0	-8.80724e+06	0	0	-8.80724e+06	-1.84949e+06	-8.80724e+06	1.64619e+06	0	-9.01054e+06	4.44002e+06	-2.79364e+06	1.64638e+06	6.583e+06	-4.14619e+06	2.43681e+06	4.44002e+06	-2.79364e+06	1.64638e+06	6.583e+06	-4.14619e+06	2.43681e+06	4.44002e+06	-2.79364e+06	1.64638e+06	-1.0052e+07	-1.93659e+06	-7.16086e+06	-6.57373e+06	1.64638e+06		-1.88e+06	-2.81635e+06	-1.88e+06	-2.81635e+06	-1.35784e+07	-7.18975e+06	-1.06872e+07	-1.18269e+07
2036	-1.47729e+06	-1.16846e+07	0	0	-1.31619e+07	3.11357e+06	-9.69989e+06	1.90999e+06	0	-4.67634e+06	0	-9.69989e+06	0	0	-9.69989e+06	-2.20318e+06	-9.69989e+06	1.90999e+06	0	-9.99308e+06	5.1759e+06	-3.25137e+06	1.92453e+06	7.77617e+06	-4.88983e+06	2.88634e+06	5.1759e+06	-3.25137e+06	1.92453e+06	7.77617e+06	-4.88983e+06	2.88634e+06	5.1759e+06	-3.25137e+06	1.92453e+06	-1.12373e+07	-1.79e+06	-7.77536e+06	-7.10674e+06	1.92453e+06		-2.19363e+06	-3.32273e+06	-2.19363e+06	-3.32273e+06	-1.53555e+07	-7.99907e+06	-1.18935e+07	-1.33158e+07
2037	-1.74702e+06	-1.29818e+07	0	0	-1.47289e+07	3.44184e+06	-1.06424e+07	1.8594e+06	0	-5.34118e+06	0	-1.06424e+07	0	0	-1.06424e+07	-2.55863e+06	-1.06424e+07	1.8594e+06	0	-1.13416e+07	5.96807e+06	-3.74368e+06	2.22439e+06	8.9888e+06	-5.64594e+06	3.34286e+06	5.96807e+06	-3.74368e+06	2.22439e+06	8.9888e+06	-5.64594e+06	3.34286e+06	5.96807e+06	-3.74368e+06	2.22439e+06	-1.25045e+07	-1.99832e+06	-8.41804e+06	-7.99879e+06	2.22439e+06		-2.53264e+06	-3.84118e+06	-2.53264e+06	-3.84118e+06	-1.72615e+07	-9.18236e+06	-1.31751e+07	-1.51828e+07
2038	-2.0396e+06	-1.43622e+07	0	0	-1.64018e+07	3.53232e+06	-1.16383e+07	1.80823e+06	0	-6.29772e+06	0	-1.16383e+07	0	0	-1.16383e+07	-2.64852e+06	-1.16383e+07	1.80823e+06	0	-1.24786e+07	6.81652e+06	-4.27056e+06	2.54596e+06	9.76779e+06	-6.12223e+06	3.64556e+06	6.81652e+06	-4.27056e+06	2.54596e+06	9.76779e+06	-6.12223e+06	3.64556e+06	6.81652e+06	-4.27056e+06	2.54596e+06	-1.38558e+07	-2.65216e+06	-9.0923e+06	-8.833e+06	2.54596e+06		-2.89722e+06	-4.18788e+06	-2.89722e+06	-4.18788e+06	-1.9299e+07	-1.04856e+07	-1.45355e+07	-1.66664e+07
2039	-2.45827e+06	-1.59342e+07	0	0	-1.83925e+07	3.60043e+06	-1.26907e+07	2.07179e+06	0	-7.01848e+06	0	-1.26907e+07	0	0	-1.26907e+07	-2.72013e+06	-1.26907e+07	2.07179e+06	0	-1.3339e+07	7.72127e+06	-4.83199e+06	2.88928e+06	1.06034e+07	-6.63249e+06	3.97088e+06	7.72127e+06	-4.83199e+06	2.88928e+06	1.06034e+07	-6.63249e+06	3.97088e+06	7.72127e+06	-4.83199e+06	2.88928e+06	-1.55032e+07	-3.0476e+06	-9.80142e+06	-9.36816e+06	2.88928e+06		-3.28754e+06	-4.56011e+06	-3.28754e+06	-4.56011e+06	-2.168e+07	-1.15786e+07	-1.59782e+07	-1.78991e+07
2040	-2.98515e+06	-1.75676e+07	-67835.4	-54922.4	-2.06755e+07	3.64856e+06	-1.38028e+07	2.01776e+06	0	-8.13649e+06	0	-1.38028e+07	0	0	-1.38028e+07	-3.05849e+06	-1.38028e+07	2.01776e+06	0	-1.48435e+07	8.6823e+06	-5.42373e+06	3.25857e+06	1.19846e+07	-7.48602e+06	4.49858e+06	8.6823e+06	-5.42373e+06	3.25857e+06	1.19846e+07	-7.48602e+06	4.49858e+06	8.6823e+06	-5.42373e+06	3.25857e+06	-1.7417e+07	-3.63792e+06	-1.05442e+07	-1.0345e+07	3.25857e+06		-3.69098e+06	-5.13844e+06	-3.69098e+06	-5.13844e+06	-2.43665e+07	-1.32749e+07	-1.74938e+07	-1.9982e+07
2041	-3.47445e+06	-1.93648e+07	-135996	-110108	-2.30854e+07	3.67872e+06	-1.49775e+07	1.96259e+06	0	-9.33623e+06	0	-1.49775e+07	0	0	-1.49775e+07	-3.12785e+06	-1.49775e+07	1.96259e+06	0	-1.61428e+07	9.24926e+06	-5.76317e+06	3.48609e+06	1.29239e+07	-8.05794e+06	4.86595e+06	9.69963e+06	-6.04968e+06	3.64995e+06	1.29239e+07	-8.05794e+06	4.86595e+06	9.69963e+06	-6.04968e+06	3.64995e+06	-1.95993e+07	-4.47028e+06	-1.13276e+07	-1.12769e+07	3.64995e+06		-3.94154e+06	-5.54626e+06	-4.11962e+06	-5.54626e+06	-2.70269e+07	-1.48825e+07	-1.90972e+07	-2.16891e+07
2042	-4.0515e+06	-2.13262e+07	-204493	-165566	-2.57478e+07	3.69259e+06	-1.62176e+07	2.22604e+06	0	-1.0299e+07	0	-1.62176e+07	0	0	-1.62176e+07	-3.17971e+06	-1.62176e+07	2.22604e+06	0	-1.71713e+07	9.87285e+06	-6.13745e+06	3.7354e+06	1.39197e+07	-8.6629e+06	5.25676e+06	1.07732e+07	-6.70981e+06	4.06343e+06	1.39197e+07	-8.6629e+06	5.25676e+06	1.07732e+07	-6.70981e+06	4.06343e+06	-2.20124e+07	-5.04222e+06	-1.21542e+07	-1.19145e+07	4.06343e+06		-4.21617e+06	-5.97921e+06	-4.57363e+06	-5.97921e+06	-2.9964e+07	-1.62782e+07	-2.07912e+07	-2.31505e+07
2043	-4.56411e+06	-2.32952e+07	-235511	-220849	-2.83157e+07	3.959e+06	-1.74503e+07	2.43445e+06	-33258.4	-1.10901e+07	0	-1.74503e+07	0	-33258.4	-1.74835e+07	-3.50378e+06	-1.74503e+07	2.46336e+06	-33258.4	-1.85239e+07	1.0553e+07	-6.54229e+06	4.01074e+06	1.54696e+07	-9.61105e+06	5.8585e+06	1.19031e+07	-7.39672e+06	4.50642e+06	1.54696e+07	-9.61105e+06	5.8585e+06	1.19031e+07	-7.39672e+06	4.50642e+06	-2.4305e+07	-5.23156e+06	-1.29771e+07	-1.26654e+07	4.50642e+06		-4.50847e+06	-6.62479e+06	-5.04576e+06	-6.62479e+06	-3.28242e+07	-1.77149e+07	-2.25293e+07	-2.51487e+07
2044	-5.09301e+06	-2.52705e+07	-266642	-276306	-3.09065e+07	4.31132e+06	-1.87418e+07	2.33554e+06	-66607.7	-1.21615e+07	0	-1.87418e+07	0	-66607.7	-1.88084e+07	-3.82802e+06	-1.87418e+07	2.4009e+06	-66607.7	-2.02355e+07	1.14119e+07	-7.06086e+06	4.35103e+06	1.67943e+07	-1.04141e+07	6.38016e+06	1.29525e+07	-8.03e+06	4.92248e+06	1.69004e+07	-1.04816e+07	6.4188e+06	1.30746e+07	-8.10771e+06	4.96691e+06	-2.65555e+07	-5.78136e+06	-1.38859e+07	-1.38167e+07	4.96691e+06		-4.87297e+06	-7.18508e+06	-5.48875e+06	-7.22705e+06	-3.57795e+07	-1.93466e+07	-2.42971e+07	-2.74625e+07
2045	-5.56397e+06	-2.7251e+07	-297890	-331945	-3.34448e+07	4.69092e+06	-2.00958e+07	2.57959e+06	-100053	-1.29253e+07	0	-2.00958e+07	0	-100053	-2.01959e+07	-3.90639e+06	-2.00958e+07	2.65259e+06	-100053	-2.14496e+07	1.23272e+07	-7.61468e+06	4.71251e+06	1.76961e+07	-1.09438e+07	6.75228e+06	1.40582e+07	-8.69695e+06	5.36124e+06	1.79358e+07	-1.10961e+07	6.83965e+06	1.43024e+07	-8.85211e+06	5.45029e+06	-2.87323e+07	-6.17306e+06	-1.48346e+07	-1.461e+07	5.45029e+06		-5.26181e+06	-7.58132e+06	-5.95651e+06	-7.67632e+06	-3.87067e+07	-2.05067e+07	-2.61524e+07	-2.9126e+07
2046	-5.97287e+06	-2.92358e+07	-329260	-387774	-3.59257e+07	5.03209e+06	-2.15155e+07	2.80155e+06	-133599	-1.38155e+07	0	-2.15155e+07	0	-133599	-2.16491e+07	-4.24338e+06	-2.15155e+07	2.88222e+06	-133599	-2.30103e+07	1.32989e+07	-8.20271e+06	5.0962e+06	1.92395e+07	-1.18803e+07	7.35922e+06	1.52203e+07	-9.39823e+06	5.82202e+06	1.95065e+07	-1.2049e+07	7.4575e+06	1.55865e+07	-9.62998e+06	5.9565e+06	-3.08295e+07	-6.45624e+06	-1.58271e+07	-1.55528e+07	5.9565e+06		-5.67512e+06	-8.23336e+06	-6.44916e+06	-8.33972e+06	-4.16008e+07	-2.20488e+07	-2.80983e+07	-3.135e+07
2047	-6.31614e+06	-3.1224e+07	-360755	-443800	-3.83446e+07	5.37186e+06	-2.30036e+07	2.71088e+06	-167251	-1.50881e+07	0	-2.30036e+07	0	-167251	-2.31708e+07	-4.57652e+06	-2.30036e+07	2.8067e+06	-167251	-2.49406e+07	1.4327e+07	-8.8248e+06	5.50224e+06	2.08029e+07	-1.28293e+07	7.97361e+06	1.64387e+07	-1.01336e+07	6.30505e+06	2.10972e+07	-1.30138e+07	8.08339e+06	1.69268e+07	-1.04412e+07	6.48561e+06	-3.28424e+07	-7.11447e+06	-1.68658e+07	-1.68572e+07	6.48561e+06		-6.11302e+06	-8.89693e+06	-6.96684e+06	-9.0147e+06	-4.44577e+07	-2.3985e+07	-3.01377e+07	-3.39553e+07
2048	-6.66795e+06	-3.32954e+07	-392379	-500031	-4.08557e+07	5.47034e+06	-2.45623e+07	2.62727e+06	-201014	-1.66657e+07	0	-2.45623e+07	0	-201014	-2.47633e+07	-4.65572e+06	-2.45623e+07	2.72338e+06	-201014	-2.66957e+07	1.54116e+07	-9.4808e+06	5.93076e+06	2.19347e+07	-1.34996e+07	8.43508e+06	1.77134e+07	-1.09029e+07	6.81049e+06	2.22835e+07	-1.37174e+07	8.56618e+06	1.83235e+07	-1.12859e+07	7.03766e+06	-3.4925e+07	-8.23062e+06	-1.79528e+07	-1.81295e+07	7.03766e+06		-6.57563e+06	-9.3934e+06	-7.50966e+06	-9.53347e+06	-4.74314e+07	-2.60591e+07	-3.2273e+07	-3.62291e+07
2049	-7.0277e+06	-3.54512e+07	-424135	-556473	-4.34595e+07	5.52642e+06	-2.61936e+07	2.85678e+06	-234891	-1.80453e+07	0	-2.61936e+07	0	-234891	-2.64285e+07	-4.69768e+06	-2.61936e+07	2.9532e+06	-234891	-2.8173e+07	1.65525e+07	-1.01706e+07	6.38185e+06	2.31502e+07	-1.42206e+07	8.92959e+06	1.90445e+07	-1.1706e+07	7.3385e+06	2.3499e+07	-1.44369e+07	9.06212e+06	1.97765e+07	-1.21638e+07	7.61271e+06	-3.70777e+07	-9.11572e+06	-1.909e+07	-1.91109e+07	7.61271e+06		-7.06309e+06	-9.92564e+06	-8.07776e+06	-1.00665e+07	-5.05226e+07	-2.7971e+07	-3.45063e+07	-3.82395e+07
2050	-7.39495e+06	-3.76926e+07	-453408	-608678	-4.61496e+07	5.55701e+06	-2.78991e+07	2.77144e+06	-266314	-1.9837e+07	0	-2.78991e+07	0	-266314	-2.81654e+07	-5.0018e+06	-2.78991e+07	2.875e+06	-266314	-3.02922e+07	1.77497e+07	-1.0871e+07	6.87877e+06	2.49099e+07	-1.52546e+07	9.65532e+06	2.04319e+07	-1.25159e+07	7.91603e+06	2.52587e+07	-1.54693e+07	9.78941e+06	2.12857e+07	-1.3046e+07	8.23972e+06	-3.92709e+07	-1.01816e+07	-2.02494e+07	-2.05028e+07	8.23972e+06		-7.51717e+06	-1.05911e+07	-8.60373e+06	-1.07325e+07	-5.36668e+07	-3.04281e+07	-3.67691e+07	-4.10247e+07
2051	-7.7695e+06	-4.00203e+07	-482780	-661037	-4.89336e+07	5.56465e+06	-2.968e+07	2.68514e+06	-297819	-2.1728e+07	0	-2.968e+07	0	-297819	-2.99778e+07	-5.04956e+06	-2.968e+07	2.78893e+06	-297819	-3.22385e+07	1.90034e+07	-1.16037e+07	7.39963e+06	2.62292e+07	-1.60127e+07	1.02164e+07	2.18757e+07	-1.33581e+07	8.51758e+06	2.66052e+07	-1.6243e+07	1.03622e+07	2.28513e+07	-1.39602e+07	8.89109e+06	-4.1534e+07	-1.15116e+07	-2.14602e+07	-2.18763e+07	8.89109e+06		-7.99329e+06	-1.11022e+07	-9.15204e+06	-1.12539e+07	-5.69269e+07	-3.28302e+07	-3.91299e+07	-4.34923e+07
2052	-8.14678e+06	-4.24351e+07	-512255	-713557	-5.18077e+07	5.55148e+06	-3.15418e+07	2.88268e+06	-329408	-2.34371e+07	0	-3.15418e+07	0	-329408	-3.18712e+07	-5.06181e+06	-3.15418e+07	3.01365e+06	-329408	-3.39194e+07	2.03134e+07	-1.23689e+07	7.94449e+06	2.76048e+07	-1.68019e+07	1.08029e+07	2.33758e+07	-1.42325e+07	9.14326e+06	2.79808e+07	-1.7031e+07	1.09498e+07	2.44731e+07	-1.49063e+07	9.56686e+06	-4.38632e+07	-1.26342e+07	-2.2728e+07	-2.29697e+07	9.56686e+06		-8.49155e+06	-1.16355e+07	-9.72279e+06	-1.17878e+07	-6.02992e+07	-3.50726e+07	-4.1594e+07	-4.57072e+07
2053	-8.53109e+06	-4.49339e+07	-541837	-766244	-5.47731e+07	5.78676e+06	-3.34776e+07	3.05692e+06	-361086	-2.4995e+07	0	-3.34776e+07	0	-361086	-3.38387e+07	-5.34173e+06	-3.34776e+07	3.22206e+06	-361086	-3.59583e+07	2.16797e+07	-1.31663e+07	8.51342e+06	2.94275e+07	-1.7868e+07	1.15594e+07	2.49322e+07	-1.5139e+07	9.79314e+06	2.99093e+07	-1.81618e+07	1.17475e+07	2.61512e+07	-1.58842e+07	1.02671e+07	-4.62596e+07	-1.34356e+07	-2.40455e+07	-2.42108e+07	1.02671e+07		-9.01204e+06	-1.23306e+07	-1.03161e+07	-1.25213e+07	-6.37851e+07	-3.73256e+07	-4.41547e+07	-4.84797e+07
2054	-8.92299e+06	-4.75172e+07	-571529	-819105	-5.78309e+07	6.10334e+06	-3.54875e+07	2.95131e+06	-392858	-2.68257e+07	0	-3.54875e+07	0	-392858	-3.58803e+07	-5.63691e+06	-3.54875e+07	3.1307e+06	-392858	-3.83865e+07	2.31024e+07	-1.39959e+07	9.10648e+06	3.12682e+07	-1.8943e+07	1.23251e+07	2.65449e+07	-1.60776e+07	1.04673e+07	3.18833e+07	-1.93185e+07	1.25648e+07	2.78857e+07	-1.68939e+07	1.09918e+07	-4.87244e+07	-1.45005e+07	-2.5413e+07	-2.58217e+07	1.09918e+07		-9.55485e+06	-1.30351e+07	-1.09319e+07	-1.32742e+07	-6.73857e+07	-3.98608e+07	-4.68122e+07	-5.16607e+07
2055	-9.32297e+06	-5.01856e+07	-601334	-872146	-6.0982e+07	6.44448e+06	-3.75716e+07	3.15953e+06	-424728	-2.83923e+07	0	-3.75716e+07	0	-424728	-3.79963e+07	-5.66915e+06	-3.75716e+07	3.34627e+06	-424728	-4.03192e+07	2.45814e+07	-1.48577e+07	9.72373e+06	3.27656e+07	-1.97999e+07	1.29657e+07	2.82139e+07	-1.70481e+07	1.11658e+07	3.34352e+07	-2.02073e+07	1.32279e+07	2.96764e+07	-1.79353e+07	1.17411e+07	-5.12583e+07	-1.54267e+07	-2.68306e+07	-2.70913e+07	1.17411e+07		-1.01201e+07	-1.36199e+07	-1.15705e+07	-1.38794e+07	-7.11021e+07	-4.20122e+07	-4.95669e+07	-5.41986e+07
2056	-9.73151e+06	-5.29392e+07	-631255	-925373	-6.42274e+07	6.74486e+06	-3.97303e+07	3.34627e+06	-456699	-3.00958e+07	0	-3.97303e+07	0	-456699	-4.0187e+07	-5.95632e+06	-3.97303e+07	3.54734e+06	-456699	-4.25959e+07	2.61167e+07	-1.57515e+07	1.03652e+07	3.48247e+07	-2.10029e+07	1.38218e+07	2.99392e+07	-1.80506e+07	1.18887e+07	3.55216e+07	-2.14247e+07	1.40968e+07	3.15234e+07	-1.90085e+07	1.25149e+07	-5.38621e+07	-1.6274e+07	-2.82983e+07	-2.84991e+07	1.25149e+07		-1.07077e+07	-1.44078e+07	-1.22319e+07	-1.46781e+07	-7.49351e+07	-4.45036e+07	-5.24188e+07	-5.7274e+07
2057	-1.01491e+07	-5.40218e+07	-1.86369e+06	-2.17482e+06	-6.82094e+07	7.04272e+06	-4.13695e+07	3.2349e+06	-488776	-3.15807e+07	0	-4.13695e+07	0	-488776	-4.18583e+07	-6.25553e+06	-4.13695e+07	3.4434e+06	-488776	-4.46704e+07	2.77084e+07	-1.66774e+07	1.1031e+07	3.69039e+07	-2.22162e+07	1.46877e+07	3.17209e+07	-1.90849e+07	1.2636e+07	3.76553e+07	-2.26695e+07	1.49858e+07	3.34267e+07	-2.01134e+07	1.33133e+07	-5.71784e+07	-1.6893e+07	-2.92223e+07	-2.96846e+07	1.33133e+07		-1.1318e+07	-1.52061e+07	-1.29161e+07	-1.5497e+07	-7.95274e+07	-4.67868e+07	-5.47744e+07	-6.01674e+07
2058	-9.42738e+06	-5.5016e+07	-3.09172e+06	-3.41997e+06	-7.09551e+07	7.09688e+06	-4.30809e+07	3.12328e+06	-520962	-3.33817e+07	0	-4.30809e+07	0	-520962	-4.36019e+07	-6.28449e+06	-4.30809e+07	3.33231e+06	-520962	-4.65541e+07	2.5502e+07	-1.52369e+07	1.02651e+07	3.85796e+07	-2.31733e+07	1.54063e+07	3.35589e+07	-2.01511e+07	1.34078e+07	3.93581e+07	-2.36411e+07	1.5717e+07	3.53863e+07	-2.12499e+07	1.41364e+07	-6.069e+07	-1.79755e+07	-3.01941e+07	-3.08371e+07	1.41364e+07		-1.05735e+07	-1.58635e+07	-1.36233e+07	-1.61653e+07	-8.15286e+07	-4.92453e+07	-5.72252e+07	-6.27194e+07
2059	-8.55866e+06	-5.59356e+07	-4.30548e+06	-4.65099e+06	-7.34507e+07	7.10638e+06	-4.48623e+07	3.31734e+06	-553261	-3.49918e+07	0	-4.48623e+07	0	-553261	-4.54156e+07	-6.27393e+06	-4.48623e+07	3.52692e+06	-553261	-4.81626e+07	2.33528e+07	-1.38373e+07	9.51545e+06	4.03115e+07	-2.41617e+07	1.61498e+07	3.54531e+07	-2.1249e+07	1.42041e+07	4.109e+07	-2.46272e+07	1.64628e+07	3.74022e+07	-2.2418e+07	1.49842e+07	-6.39353e+07	-1.8842e+07	-3.12114e+07	-3.16997e+07	1.49842e+07		-9.84583e+06	-1.65437e+07	-1.43535e+07	-1.68467e+07	-8.32966e+07	-5.15355e+07	-5.97691e+07	-6.50093e+07
2060	-7.56143e+06	-5.67921e+07	-5.50765e+06	-5.87058e+06	-7.57317e+07	7.08903e+06	-4.67107e+07	3.20354e+06	-585677	-3.70038e+07	0	-4.67107e+07	0	-585677	-4.72964e+07	-6.52529e+06	-4.67107e+07	3.42065e+06	-585677	-5.04011e+07	2.12607e+07	-1.24984e+07	8.76223e+06	4.2587e+07	-2.54874e+07	1.70996e+07	3.74037e+07	-2.23787e+07	1.5025e+07	4.33654e+07	-2.59506e+07	1.74147e+07	3.94743e+07	-2.36177e+07	1.58566e+07	-6.69695e+07	-1.99043e+07	-3.22714e+07	-3.29863e+07	1.58566e+07		-9.135e+06	-1.74209e+07	-1.51069e+07	-1.77251e+07	-8.48667e+07	-5.44247e+07	-6.24033e+07	-6.81262e+07
2061	-6.45183e+06	-5.75946e+07	-6.70035e+06	-7.08083e+06	-7.78276e+07	7.04749e+06	-4.86231e+07	3.08888e+06	-618212	-3.91049e+07	0	-4.86231e+07	0	-618212	-4.92413e+07	-6.51883e+06	-4.86231e+07	3.30661e+06	-618212	-5.24535e+07	1.92256e+07	-1.12147e+07	8.01084e+06	4.44226e+07	-2.65368e+07	1.78858e+07	3.94106e+07	-2.35401e+07	1.58705e+07	4.52282e+07	-2.7015e+07	1.82131e+07	4.16028e+07	-2.4849e+07	1.67538e+07	-6.98168e+07	-2.12191e+07	-3.33708e+07	-3.42404e+07	1.67538e+07		-8.44114e+06	-1.81445e+07	-1.58835e+07	-1.84596e+07	-8.62688e+07	-5.72494e+07	-6.51248e+07	-7.09132e+07
2062	-5.24409e+06	-5.83509e+07	-7.88518e+06	-8.28334e+06	-7.97635e+07	6.98405e+06	-5.05959e+07	3.28511e+06	-650872	-4.09776e+07	0	-5.05959e+07	0	-650872	-5.12467e+07	-6.47542e+06	-5.05959e+07	3.50348e+06	-650872	-5.42187e+07	1.72474e+07	-9.98198e+06	7.26546e+06	4.63145e+07	-2.76168e+07	1.86978e+07	4.14737e+07	-2.47331e+07	1.67406e+07	4.71201e+07	-2.80933e+07	1.90268e+07	4.37875e+07	-2.61118e+07	1.76757e+07	-7.2498e+07	-2.22798e+07	-3.45061e+07	-3.51919e+07	1.76757e+07		-7.76433e+06	-1.88911e+07	-1.66834e+07	-1.92075e+07	-8.75278e+07	-5.98686e+07	-6.79301e+07	-7.34262e+07
2063	-3.95629e+06	-5.9067e+07	-9.06342e+06	-9.47938e+06	-8.15661e+07	7.16738e+06	-5.262e+07	3.43122e+06	-683658	-4.27051e+07	0	-5.262e+07	0	-683658	-5.33037e+07	-6.70014e+06	-5.262e+07	3.68414e+06	-683658	-5.63197e+07	1.53262e+07	-8.79697e+06	6.52927e+06	4.87588e+07	-2.90392e+07	1.97196e+07	4.35932e+07	-2.59578e+07	1.76354e+07	4.95643e+07	-2.95141e+07	2.00502e+07	4.60286e+07	-2.74061e+07	1.86225e+07	-7.50368e+07	-2.29855e+07	-3.56683e+07	-3.62694e+07	1.86225e+07		-7.10467e+06	-1.98381e+07	-1.75067e+07	-2.01558e+07	-8.86708e+07	-6.25432e+07	-7.08103e+07	-7.64755e+07
2064	-2.59982e+06	-5.97482e+07	-1.0236e+07	-1.06699e+07	-8.3254e+07	7.43043e+06	-5.46916e+07	3.27758e+06	-716576	-4.47002e+07	0	-5.46916e+07	0	-716576	-5.54082e+07	-6.94035e+06	-5.46916e+07	3.56514e+06	-716576	-5.87834e+07	1.34619e+07	-7.65716e+06	5.80478e+06	5.11154e+07	-3.04041e+07	2.07113e+07	4.5769e+07	-2.72141e+07	1.85549e+07	5.2054e+07	-3.09604e+07	2.10936e+07	4.83259e+07	-2.87319e+07	1.9594e+07	-7.74492e+07	-2.39889e+07	-3.68533e+07	-3.76898e+07	1.9594e+07		-6.46222e+06	-2.07577e+07	-1.83534e+07	-2.11242e+07	-8.97162e+07	-6.54578e+07	-7.37616e+07	-7.99076e+07
2065	-1.18491e+06	-6.03988e+07	-1.14038e+07	-1.18558e+07	-8.48433e+07	7.71767e+06	-5.68066e+07	3.45784e+06	-749628	-4.63807e+07	0	-5.68066e+07	0	-749628	-5.75563e+07	-6.91671e+06	-5.68066e+07	3.75318e+06	-749628	-6.07198e+07	1.16545e+07	-6.56057e+06	5.09391e+06	5.30505e+07	-3.15011e+07	2.15494e+07	4.80011e+07	-2.8502e+07	1.94991e+07	5.41221e+07	-3.21386e+07	2.19835e+07	5.06795e+07	-3.00892e+07	2.05903e+07	-7.97494e+07	-2.48314e+07	-3.80572e+07	-3.87363e+07	2.05903e+07		-5.8371e+06	-2.15303e+07	-1.92238e+07	-2.19458e+07	-9.06804e+07	-6.7911e+07	-7.678e+07	-8.26656e+07
2066	279252	-6.10223e+07	-1.25674e+07	-1.30375e+07	-8.63479e+07	7.9639e+06	-5.89611e+07	3.61671e+06	-782816	-4.81633e+07	0	-5.89611e+07	0	-782816	-5.97439e+07	-7.14892e+06	-5.89611e+07	3.92681e+06	-782816	-6.2966e+07	9.90382e+06	-5.50561e+06	4.39821e+06	5.56254e+07	-3.29932e+07	2.26321e+07	5.02894e+07	-2.98215e+07	2.0468e+07	5.67242e+07	-3.36452e+07	2.3079e+07	5.30894e+07	-3.14779e+07	2.16115e+07	-8.19497e+07	-2.55312e+07	-3.92759e+07	-3.9887e+07	2.16115e+07		-5.22937e+06	-2.25347e+07	-2.01178e+07	-2.29617e+07	-9.15773e+07	-7.0698e+07	-7.98617e+07	-8.59277e+07
2067	1.78435e+06	-6.16219e+07	-1.37271e+07	-1.42155e+07	-8.77802e+07	8.2075e+06	-5.99327e+07	3.47061e+06	-2.0926e+06	-5.03472e+07	0	-6.1151e+07	0	-816144	-6.19671e+07	-7.39373e+06	-6.1151e+07	3.79553e+06	-816144	-6.55653e+07	8.20993e+06	-4.49107e+06	3.71886e+06	5.82204e+07	-3.4496e+07	2.37244e+07	5.26341e+07	-3.11724e+07	2.14617e+07	5.93736e+07	-3.51789e+07	2.41948e+07	5.55556e+07	-3.2898e+07	2.26576e+07	-8.40614e+07	-2.66228e+07	-4.05055e+07	-4.13706e+07	2.26576e+07		-4.63914e+06	-2.35503e+07	-2.10355e+07	-2.39986e+07	-9.24194e+07	-7.38975e+07	-8.30026e+07	-8.95639e+07
2068	3.31675e+06	-6.22002e+07	-1.48836e+07	-1.53903e+07	-8.91573e+07	8.3267e+06	-6.07692e+07	3.33128e+06	-3.39774e+06	-5.2509e+07	0	-6.33662e+07	0	-849615	-6.42158e+07	-7.36858e+06	-6.33662e+07	3.6572e+06	-849615	-6.79271e+07	6.57278e+06	-3.51597e+06	3.05682e+06	5.83353e+07	-3.44487e+07	2.38866e+07	5.50351e+07	-3.2555e+07	2.24801e+07	6.15926e+07	-3.64392e+07	2.51534e+07	5.80781e+07	-3.43496e+07	2.37285e+07	-8.61005e+07	-2.86224e+07	-4.17356e+07	-4.27737e+07	2.37285e+07		-4.06648e+06	-2.36831e+07	-2.19771e+07	-2.48857e+07	-9.32238e+07	-7.6192e+07	-8.61929e+07	-9.28128e+07
2069	4.86958e+06	-6.27592e+07	-1.60369e+07	-1.65622e+07	-9.04888e+07	8.42743e+06	-6.14849e+07	3.49771e+06	-4.68772e+06	-5.42475e+07	0	-6.56026e+07	0	-883233	-6.64858e+07	-7.30473e+06	-6.56026e+07	3.82466e+06	-883233	-6.99659e+07	4.99234e+06	-2.57951e+06	2.41284e+06	5.85342e+07	-3.44546e+07	2.40796e+07	5.74924e+07	-3.3969e+07	2.35234e+07	6.38407e+07	-3.77138e+07	2.61269e+07	6.06569e+07	-3.58325e+07	2.48244e+07	-8.80759e+07	-3.01679e+07	-4.29624e+07	-4.3839e+07	2.48244e+07		-3.51149e+06	-2.38459e+07	-2.29426e+07	-2.57866e+07	-9.40002e+07	-7.80934e+07	-8.94284e+07	-9.57525e+07
2070	6.43665e+06	-6.33011e+07	-1.71874e+07	-1.77314e+07	-9.17832e+07	8.67402e+06	-6.20917e+07	3.35637e+06	-5.96543e+06	-5.60267e+07	0	-6.78565e+07	0	-917000	-6.87735e+07	-7.50351e+06	-6.78565e+07	3.69134e+06	-917000	-7.25856e+07	3.46859e+06	-1.68107e+06	1.78752e+06	5.92764e+07	-3.48128e+07	2.44635e+07	6.00059e+07	-3.54145e+07	2.45915e+07	6.66318e+07	-3.93256e+07	2.73061e+07	6.3292e+07	-3.73469e+07	2.59451e+07	-8.99957e+07	-3.15632e+07	-4.4182e+07	-4.52795e+07	2.59451e+07		-2.97424e+06	-2.42034e+07	-2.39321e+07	-2.68854e+07	-9.47575e+07	-8.02301e+07	-9.27056e+07	-9.9471e+07
2071	8.01238e+06	-6.38273e+07	-1.83353e+07	-1.88981e+07	-9.30483e+07	8.92631e+06	-6.25995e+07	3.21425e+06	-7.23308e+06	-5.7692e+07	0	-7.0124e+07	0	-950918	-7.10749e+07	-7.44486e+06	-7.0124e+07	3.55034e+06	-950918	-7.49694e+07	2.00149e+06	-820118	1.18138e+06	5.95793e+07	-3.4907e+07	2.46723e+07	6.25758e+07	-3.68915e+07	2.56844e+07	6.90107e+07	-4.06783e+07	2.83324e+07	6.59833e+07	-3.88926e+07	2.70907e+07	-9.1867e+07	-3.30197e+07	-4.53905e+07	-4.6637e+07	2.70907e+07		-2.45484e+06	-2.44049e+07	-2.49457e+07	-2.78411e+07	-9.55032e+07	-8.20968e+07	-9.60206e+07	-1.0281e+08
2072	9.59172e+06	-6.43393e+07	-1.80022e+07	-2.00625e+07	-9.28123e+07	9.18323e+06	-6.30168e+07	3.38151e+06	-8.4924e+06	-5.89445e+07	0	-7.1034e+07	0	-2.43825e+06	-7.34723e+07	-7.35019e+06	-7.24016e+07	3.74569e+06	-984991	-7.6991e+07	591035	3762.75	594798	5.99389e+07	-3.50419e+07	2.48969e+07	6.5202e+07	-3.83999e+07	2.68021e+07	7.14187e+07	-4.20447e+07	2.9374e+07	6.8731e+07	-4.04697e+07	2.82613e+07	-9.22175e+07	-3.40475e+07	-4.66702e+07	-4.76171e+07	2.82613e+07		-1.95336e+06	-2.4627e+07	-2.59835e+07	-2.88109e+07	-9.47657e+07	-8.35715e+07	-9.94557e+07	-1.05802e+08
2073	9.78128e+06	-6.49443e+07	-1.76656e+07	-2.12166e+07	-9.40452e+07	9.17256e+06	-6.33512e+07	3.23363e+06	-9.74109e+06	-6.06861e+07	0	-7.17797e+07	0	-3.91882e+06	-7.56985e+07	-7.53878e+06	-7.46784e+07	3.63278e+06	-1.01883e+06	-7.96032e+07	1.56988e+06	-661959	907922	6.07448e+07	-3.54479e+07	2.52969e+07	6.5511e+07	-3.84463e+07	2.70648e+07	7.43786e+07	-4.37366e+07	3.06421e+07	7.14942e+07	-4.20365e+07	2.94577e+07	-9.31373e+07	-3.53892e+07	-4.86337e+07	-4.89612e+07	2.94577e+07		-2.30415e+06	-2.49956e+07	-2.61815e+07	-2.99651e+07	-9.63493e+07	-8.56817e+07	-1.0188e+08	-1.09568e+08
2074	9.69716e+06	-6.55256e+07	-1.73446e+07	-2.23682e+07	-9.55413e+07	9.20646e+06	-6.36091e+07	3.1044e+06	-1.09833e+07	-6.22816e+07	0	-7.23776e+07	0	-5.3816e+06	-7.77592e+07	-7.47155e+06	-7.69511e+07	3.51861e+06	-1.05282e+06	-8.19569e+07	2.60507e+06	-1.35839e+06	1.24668e+06	6.11026e+07	-3.55788e+07	2.55238e+07	6.58767e+07	-3.85295e+07	2.73471e+07	7.69175e+07	-4.51627e+07	3.17548e+07	7.43137e+07	-4.36341e+07	3.06796e+07	-9.42946e+07	-3.67578e+07	-5.04121e+07	-5.0202e+07	3.06796e+07		-2.67642e+06	-2.5205e+07	-2.64001e+07	-3.09727e+07	-9.82177e+07	-8.74866e+07	-1.04159e+08	-1.1293e+08
2075	9.3764e+06	-6.60638e+07	-1.72267e+07	-2.2978e+07	-9.68921e+07	9.23573e+06	-6.37967e+07	3.19956e+06	-1.16305e+07	-6.29919e+07	0	-7.28415e+07	0	-6.15871e+06	-7.90002e+07	-7.38754e+06	-7.92165e+07	3.62195e+06	-1.08696e+06	-8.40691e+07	3.69659e+06	-1.75916e+06	1.93743e+06	6.15954e+07	-3.56529e+07	2.59425e+07	6.62988e+07	-3.85394e+07	2.77594e+07	7.95127e+07	-4.58707e+07	3.3642e+07	7.71896e+07	-4.44341e+07	3.27554e+07	-9.49547e+07	-3.70494e+07	-5.12408e+07	-5.04271e+07	3.27554e+07		-2.75613e+06	-2.53204e+07	-2.65168e+07	-3.12559e+07	-9.96482e+07	-8.83122e+07	-1.05517e+08	-1.15325e+08
2076	8.98121e+06	-6.65862e+07	-1.69913e+07	-2.41379e+07	-9.87342e+07	9.20049e+06	-6.39191e+07	3.06667e+06	-1.28622e+07	-6.45141e+07	0	-7.31833e+07	0	-7.59497e+06	-8.07783e+07	-7.56528e+06	-8.14716e+07	3.50423e+06	-1.12126e+06	-8.6654e+07	4.54577e+06	-2.30951e+06	2.23626e+06	6.26493e+07	-3.6223e+07	2.64263e+07	6.67775e+07	-3.87174e+07	2.80601e+07	8.26415e+07	-4.76566e+07	3.4985e+07	8.01217e+07	-4.60937e+07	3.4028e+07	-9.64979e+07	-3.80878e+07	-5.27182e+07	-5.1669e+07	3.4028e+07		-3.06476e+06	-2.57798e+07	-2.67768e+07	-3.24814e+07	-1.01799e+08	-9.02939e+07	-1.07555e+08	-1.19135e+08
2077	8.39982e+06	-6.6937e+07	-1.67416e+07	-2.51271e+07	-1.00406e+08	9.1433e+06	-6.39813e+07	2.93565e+06	-1.39311e+07	-6.58335e+07	0	-7.34133e+07	0	-8.84342e+06	-8.22567e+07	-7.48324e+06	-8.22243e+07	3.37749e+06	-2.56137e+06	-8.88915e+07	5.4513e+06	-2.82234e+06	2.62896e+06	6.32461e+07	-3.64683e+07	2.67778e+07	6.73127e+07	-3.89016e+07	2.84111e+07	8.53403e+07	-4.89855e+07	3.63549e+07	8.31101e+07	-4.7579e+07	3.55311e+07	-9.77769e+07	-3.90557e+07	-5.38456e+07	-5.25366e+07	3.55311e+07		-3.33261e+06	-2.6036e+07	-2.70208e+07	-3.33719e+07	-1.03739e+08	-9.18695e+07	-1.09277e+08	-1.22263e+08
2078	7.79632e+06	-6.72733e+07	-1.65212e+07	-2.62829e+07	-1.02281e+08	9.16379e+06	-6.40632e+07	3.11478e+06	-1.51233e+07	-6.6908e+07	0	-7.36157e+07	0	-1.02302e+07	-8.38459e+07	-7.36958e+06	-8.28642e+07	3.55803e+06	-4.158e+06	-9.08338e+07	6.41319e+06	-3.4251e+06	2.98809e+06	6.38957e+07	-3.67866e+07	2.71092e+07	6.79044e+07	-3.91639e+07	2.87405e+07	8.54967e+07	-4.89104e+07	3.65863e+07	8.61548e+07	-4.93002e+07	3.68546e+07	-9.9293e+07	-3.97988e+07	-5.51053e+07	-5.42475e+07	3.68546e+07		-3.68394e+06	-2.6353e+07	-2.73225e+07	-3.35421e+07	-1.05965e+08	-9.32609e+07	-1.11168e+08	-1.24376e+08
2079	7.18409e+06	-6.75963e+07	-1.63064e+07	-2.74367e+07	-1.04155e+08	9.17257e+06	-6.4105e+07	2.97056e+06	-1.63117e+07	-6.82737e+07	0	-7.37349e+07	0	-1.16095e+07	-8.53445e+07	-7.52513e+06	-8.33462e+07	3.41527e+06	-5.735e+06	-9.31911e+07	7.43144e+06	-4.05635e+06	3.37509e+06	6.52433e+07	-3.75413e+07	2.7702e+07	6.86743e+07	-3.95415e+07	2.91328e+07	8.63238e+07	-4.92572e+07	3.70666e+07	8.92558e+07	-5.10522e+07	3.82036e+07	-1.0078e+08	-4.05717e+07	-5.62116e+07	-5.61245e+07	3.82036e+07		-4.05671e+06	-2.69204e+07	-2.76887e+07	-3.39523e+07	-1.08212e+08	-9.51941e+07	-1.13033e+08	-1.27143e+08
2080	6.57502e+06	-6.79072e+07	-1.60963e+07	-2.85886e+07	-1.06017e+08	9.33285e+06	-6.41092e+07	2.82518e+06	-1.74967e+07	-6.94479e+07	0	-7.37767e+07	0	-1.29825e+07	-8.67592e+07	-7.40129e+06	-8.36847e+07	3.27833e+06	-7.29597e+06	-9.51036e+07	8.50604e+06	-4.71707e+06	3.78897e+06	6.61275e+07	-3.80068e+07	2.81207e+07	6.95006e+07	-3.9957e+07	2.95436e+07	8.66876e+07	-4.93309e+07	3.73567e+07	9.24131e+07	-5.2835e+07	3.95781e+07	-1.02228e+08	-4.13272e+07	-5.72156e+07	-5.77469e+07	3.95781e+07		-4.45102e+06	-2.7324e+07	-2.80761e+07	-3.41979e+07	-1.10468e+08	-9.67719e+07	-1.14835e+08	-1.29301e+08
2081	5.9797e+06	-6.82071e+07	-1.58903e+07	-2.97387e+07	-1.07856e+08	9.50358e+06	-6.40782e+07	3.0055e+06	-1.86784e+07	-7.02475e+07	0	-7.37466e+07	0	-1.43497e+07	-8.80964e+07	-7.27677e+06	-8.38921e+07	3.4602e+06	-8.84367e+06	-9.65523e+07	9.63698e+06	-5.40777e+06	4.22921e+06	6.70682e+07	-3.85045e+07	2.85637e+07	7.03834e+07	-4.0409e+07	2.99743e+07	8.71352e+07	-4.94667e+07	3.76686e+07	9.56267e+07	-5.46485e+07	4.09782e+07	-1.03627e+08	-4.16839e+07	-5.8122e+07	-5.88837e+07	4.09782e+07		-4.86694e+06	-2.77489e+07	-2.84848e+07	-3.44739e+07	-1.12723e+08	-9.79964e+07	-1.16581e+08	-1.31026e+08
2082	5.40762e+06	-6.85774e+07	-1.56878e+07	-3.0887e+07	-1.09744e+08	9.68305e+06	-6.40146e+07	2.86235e+06	-1.9857e+07	-7.13262e+07	0	-7.365e+07	0	-1.57118e+07	-8.93618e+07	-7.42277e+06	-8.39795e+07	3.31866e+06	-1.03803e+07	-9.84639e+07	1.08243e+07	-6.12883e+06	4.69544e+06	6.85849e+07	-3.93611e+07	2.92238e+07	7.13226e+07	-4.08969e+07	3.04257e+07	8.81318e+07	-4.99546e+07	3.81772e+07	9.88965e+07	-5.64926e+07	4.24039e+07	-1.05049e+08	-4.21024e+07	-5.89361e+07	-6.02867e+07	4.24039e+07		-5.30453e+06	-2.83811e+07	-2.89148e+07	-3.49468e+07	-1.15049e+08	-9.97073e+07	-1.18277e+08	-1.33411e+08
2083	4.79006e+06	-6.89401e+07	-1.54884e+07	-3.20336e+07	-1.11672e+08	9.62023e+06	-6.3921e+07	2.69102e+06	-2.10326e+07	-7.26424e+07	0	-7.34919e+07	0	-1.70692e+07	-9.05612e+07	-7.28967e+06	-8.39568e+07	3.18284e+06	-1.19074e+07	-9.99711e+07	1.20679e+07	-6.88053e+06	5.18738e+06	6.96384e+07	-3.99276e+07	2.97109e+07	7.23183e+07	-4.14201e+07	3.08982e+07	8.86652e+07	-5.01603e+07	3.85048e+07	1.02223e+08	-5.83675e+07	4.38552e+07	-1.06485e+08	-4.29315e+07	-5.9663e+07	-6.14663e+07	4.38552e+07		-5.76388e+06	-2.88496e+07	-2.93663e+07	-3.52554e+07	-1.17436e+08	-1.01492e+08	-1.19927e+08	-1.35226e+08
2084	4.13268e+06	-6.92958e+07	-1.5292e+07	-3.31786e+07	-1.13634e+08	9.60623e+06	-6.38e+07	2.84531e+06	-2.22054e+07	-7.35539e+07	0	-7.32773e+07	0	-1.84224e+07	-9.16997e+07	-7.15908e+06	-8.38331e+07	3.37273e+06	-1.34265e+07	-1.01046e+08	1.33679e+07	-7.66306e+06	5.70482e+06	7.06427e+07	-4.04601e+07	3.01826e+07	7.33704e+07	-4.19784e+07	3.1392e+07	8.92823e+07	-5.04217e+07	3.88605e+07	1.05605e+08	-6.02731e+07	4.53321e+07	-1.07929e+08	-4.33713e+07	-6.03076e+07	-6.21854e+07	4.53321e+07		-6.24506e+06	-2.93019e+07	-2.98393e+07	-3.55946e+07	-1.19879e+08	-1.02856e+08	-1.21539e+08	-1.36641e+08
2085	3.44058e+06	-6.96447e+07	-1.50703e+07	-3.43765e+07	-1.15651e+08	9.59135e+06	-6.36541e+07	2.68617e+06	-2.34425e+07	-7.48192e+07	0	-7.30109e+07	0	-1.98515e+07	-9.28624e+07	-7.31679e+06	-8.36168e+07	3.22136e+06	-1.50305e+07	-1.02743e+08	1.47242e+07	-8.52571e+06	6.19847e+06	7.22229e+07	-4.13927e+07	3.08302e+07	7.44789e+07	-4.25931e+07	3.18858e+07	9.04755e+07	-5.10678e+07	3.94077e+07	1.09044e+08	-6.23128e+07	4.67311e+07	-1.09452e+08	-4.39889e+07	-6.09766e+07	-6.33351e+07	4.67311e+07		-6.65e+06	-2.97904e+07	-3.01893e+07	-3.59744e+07	-1.22301e+08	-1.0461e+08	-1.23052e+08	-1.38717e+08
2086	2.71838e+06	-6.99873e+07	-1.4851e+07	-3.55723e+07	-1.17692e+08	9.51532e+06	-6.3486e+07	2.52579e+06	-2.46764e+07	-7.61213e+07	0	-7.26973e+07	0	-2.12762e+07	-9.39735e+07	-7.18201e+06	-8.33156e+07	3.07579e+06	-1.66275e+07	-1.04049e+08	1.61368e+07	-9.42124e+06	6.71559e+06	7.34184e+07	-4.2069e+07	3.13494e+07	7.56439e+07	-4.32442e+07	3.23997e+07	9.11783e+07	-5.13912e+07	3.9787e+07	1.12539e+08	-6.43844e+07	4.81546e+07	-1.10977e+08	-4.47719e+07	-6.15738e+07	-6.42623e+07	4.81546e+07		-7.07202e+06	-3.01657e+07	-3.05562e+07	-3.62096e+07	-1.24764e+08	-1.06287e+08	-1.2453e+08	-1.40259e+08
2087	1.97021e+06	-7.03203e+07	-1.46339e+07	-3.67659e+07	-1.1975e+08	9.4204e+06	-6.32937e+07	2.71144e+06	-2.59072e+07	-7.70691e+07	0	-7.23364e+07	0	-2.26966e+07	-9.5033e+07	-7.0502e+06	-8.29323e+07	3.27628e+06	-1.82181e+07	-1.04924e+08	1.76058e+07	-1.03497e+07	7.25612e+06	7.46704e+07	-4.27794e+07	3.1891e+07	7.68653e+07	-4.39314e+07	3.29339e+07	9.19648e+07	-5.17701e+07	4.01946e+07	1.1609e+08	-6.64878e+07	4.96025e+07	-1.12494e+08	-4.51781e+07	-6.20991e+07	-6.47297e+07	4.96025e+07		-7.51113e+06	-3.05581e+07	-3.09402e+07	-3.64698e+07	-1.27261e+08	-1.07627e+08	-1.25973e+08	-1.41394e+08
2088	1.20336e+06	-7.06475e+07	-1.44189e+07	-3.79575e+07	-1.2182e+08	9.40595e+06	-6.30036e+07	2.87704e+06	-2.71701e+07	-7.78907e+07	0	-7.19403e+07	0	-2.4113e+07	-9.60533e+07	-7.20804e+06	-8.24817e+07	3.4699e+06	-1.98027e+07	-1.06023e+08	1.91311e+07	-1.13111e+07	7.82006e+06	7.64983e+07	-4.38706e+07	3.26277e+07	7.81431e+07	-4.46545e+07	3.34886e+07	9.33273e+07	-5.25333e+07	4.0794e+07	1.19698e+08	-6.8623e+07	5.10749e+07	-1.14e+08	-4.5263e+07	-6.25647e+07	-6.52285e+07	5.10749e+07		-7.96735e+06	-3.1121e+07	-3.13412e+07	-3.69005e+07	-1.29788e+08	-1.09012e+08	-1.27395e+08	-1.42923e+08
2089	524992	-7.09692e+07	-1.4206e+07	-3.9147e+07	-1.23797e+08	9.46021e+06	-6.26899e+07	2.69578e+06	-2.843e+07	-7.89639e+07	0	-7.15134e+07	0	-2.55254e+07	-9.70389e+07	-7.37269e+06	-8.19706e+07	3.31669e+06	-2.13818e+07	-1.07408e+08	2.07128e+07	-1.23054e+07	8.4074e+06	7.81678e+07	-4.48541e+07	3.33138e+07	7.94773e+07	-4.54134e+07	3.40639e+07	9.4719e+07	-5.33159e+07	4.1403e+07	1.23362e+08	-7.079e+07	5.25718e+07	-1.1539e+08	-4.56501e+07	-6.29749e+07	-6.60054e+07	5.25718e+07		-8.44069e+06	-3.16377e+07	-3.17593e+07	-3.73401e+07	-1.32238e+08	-1.10602e+08	-1.28798e+08	-1.44749e+08
2090	-79106	-7.12858e+07	-1.39316e+07	-4.03346e+07	-1.25631e+08	9.69123e+06	-6.23567e+07	2.87802e+06	-2.96869e+07	-7.94744e+07	0	-7.10599e+07	0	-2.69341e+07	-9.7994e+07	-7.25735e+06	-8.14053e+07	3.51388e+06	-2.29557e+07	-1.08105e+08	2.23507e+07	-1.33326e+07	9.01816e+06	7.93742e+07	-4.55259e+07	3.38483e+07	8.08679e+07	-4.62078e+07	3.46601e+07	9.56476e+07	-5.37889e+07	4.18586e+07	1.27082e+08	-7.29888e+07	5.40932e+07	-1.16613e+08	-4.56261e+07	-6.33339e+07	-6.62459e+07	5.40932e+07		-8.93117e+06	-3.2018e+07	-3.21945e+07	-3.76433e+07	-1.34562e+08	-1.11492e+08	-1.30188e+08	-1.45748e+08
2091	-751352	-7.15974e+07	-1.36592e+07	-4.15204e+07	-1.27528e+08	9.89514e+06	-6.20075e+07	3.06105e+06	-3.09411e+07	-7.99924e+07	0	-7.05835e+07	0	-2.83391e+07	-9.89226e+07	-7.44199e+06	-8.07917e+07	3.70491e+06	-2.45247e+07	-1.09054e+08	2.42925e+07	-1.45566e+07	9.73593e+06	8.1235e+07	-4.66293e+07	3.46057e+07	8.23149e+07	-4.70377e+07	3.52771e+07	9.71793e+07	-5.46604e+07	4.2519e+07	1.30859e+08	-7.52194e+07	5.56392e+07	-1.17792e+08	-4.53867e+07	-6.36455e+07	-6.65346e+07	5.56392e+07		-9.51197e+06	-3.25921e+07	-3.26467e+07	-3.8125e+07	-1.3704e+08	-1.12585e+08	-1.31569e+08	-1.47179e+08
2092	-1.36332e+06	-7.18825e+07	-1.46669e+07	-4.27317e+07	-1.30644e+08	1.01094e+07	-6.16452e+07	2.89773e+06	-3.21925e+07	-8.08306e+07	0	-7.00878e+07	0	-2.97405e+07	-9.98283e+07	-7.63044e+06	-8.01353e+07	3.54965e+06	-2.6089e+07	-1.10305e+08	2.62906e+07	-1.58127e+07	1.04779e+07	8.31522e+07	-4.77692e+07	3.53829e+07	8.38183e+07	-4.7903e+07	3.59153e+07	9.87402e+07	-5.55512e+07	4.3189e+07	1.34691e+08	-7.74817e+07	5.72096e+07	-1.20166e+08	-4.54477e+07	-6.3913e+07	-6.71161e+07	5.72096e+07		-1.011e+07	-3.31835e+07	-3.3116e+07	-3.86159e+07	-1.40754e+08	-1.14014e+08	-1.32944e+08	-1.48921e+08
2093	-911179	-7.21622e+07	-1.56707e+07	-4.39411e+07	-1.32685e+08	1.00828e+07	-6.12761e+07	2.74109e+06	-3.34412e+07	-8.18934e+07	0	-6.94957e+07	0	-3.11736e+07	-1.00669e+08	-7.53541e+06	-7.94447e+07	3.40113e+06	-2.76488e+07	-1.11228e+08	2.63741e+07	-1.57941e+07	1.058e+07	8.46062e+07	-4.85977e+07	3.60085e+07	8.5378e+07	-4.88035e+07	3.65745e+07	9.98381e+07	-5.6132e+07	4.37061e+07	1.3858e+08	-7.97757e+07	5.88047e+07	-1.22105e+08	-4.5885e+07	-6.40948e+07	-6.75218e+07	5.88047e+07		-1.01426e+07	-3.36385e+07	-3.36024e+07	-3.89703e+07	-1.42828e+08	-1.15532e+08	-1.34272e+08	-1.50198e+08
2094	-387757	-7.2437e+07	-1.6661e+07	-4.51485e+07	-1.34634e+08	1.00117e+07	-6.09022e+07	2.93113e+06	-3.46873e+07	-8.26467e+07	0	-6.88818e+07	0	-3.26032e+07	-1.01485e+08	-7.4392e+06	-7.87247e+07	3.59236e+06	-2.92043e+07	-1.11776e+08	2.6514e+07	-1.58124e+07	1.07016e+07	8.61439e+07	-4.94788e+07	3.6665e+07	8.6858e+07	-4.96487e+07	3.72092e+07	1.0102e+08	-5.67669e+07	4.42527e+07	1.42526e+08	-8.21015e+07	6.04243e+07	-1.23933e+08	-4.59817e+07	-6.42758e+07	-6.75231e+07	6.04243e+07		-1.0192e+07	-3.41186e+07	-3.40658e+07	-3.93497e+07	-1.44826e+08	-1.16765e+08	-1.35551e+08	-1.51126e+08
2095	188367	-7.27071e+07	-1.76404e+07	-4.6354e+07	-1.36513e+08	9.9155e+06	-6.05253e+07	2.77773e+06	-3.59309e+07	-8.3763e+07	0	-6.82502e+07	0	-3.40296e+07	-1.0228e+08	-7.61138e+06	-7.79796e+07	3.44022e+06	-3.07555e+07	-1.12906e+08	2.67104e+07	-1.58778e+07	1.08326e+07	8.82574e+07	-5.07413e+07	3.75161e+07	8.83943e+07	-5.05294e+07	3.78649e+07	1.0275e+08	-5.77665e+07	4.49832e+07	1.46527e+08	-8.4459e+07	6.20684e+07	-1.25681e+08	-4.62469e+07	-6.44149e+07	-6.79231e+07	6.20684e+07		-1.0258e+07	-3.47694e+07	-3.45462e+07	-3.98917e+07	-1.46771e+08	-1.18532e+08	-1.36826e+08	-1.52798e+08
2096	800959	-7.29729e+07	-1.8611e+07	-4.75577e+07	-1.38341e+08	9.79678e+06	-6.01512e+07	2.62349e+06	-3.71721e+07	-8.4903e+07	0	-6.76045e+07	0	-3.54527e+07	-1.03057e+08	-7.50259e+06	-7.72132e+07	3.29427e+06	-3.23027e+07	-1.13724e+08	2.69631e+07	-1.59877e+07	1.09755e+07	8.99078e+07	-5.16947e+07	3.82131e+07	8.9987e+07	-5.14461e+07	3.85408e+07	1.04017e+08	-5.84585e+07	4.55583e+07	1.50585e+08	-8.68482e+07	6.37372e+07	-1.27365e+08	-4.66899e+07	-6.45163e+07	-6.8166e+07	6.37372e+07		-1.03408e+07	-3.5284e+07	-3.50437e+07	-4.02973e+07	-1.48681e+08	-1.20187e+08	-1.38101e+08	-1.54022e+08
2097	1.43567e+06	-7.32344e+07	-1.95743e+07	-4.87597e+07	-1.40133e+08	9.65863e+06	-5.97734e+07	2.81552e+06	-3.84108e+07	-8.57101e+07	0	-6.69479e+07	0	-3.68726e+07	-1.03821e+08	-7.39462e+06	-7.64294e+07	3.48766e+06	-3.3846e+07	-1.14182e+08	2.72723e+07	-1.61399e+07	1.11324e+07	9.16146e+07	-5.26816e+07	3.8933e+07	9.16361e+07	-5.23986e+07	3.92374e+07	1.05368e+08	-5.92035e+07	4.6164e+07	1.547e+08	-8.92691e+07	6.54305e+07	-1.29e+08	-4.6777e+07	-6.45831e+07	-6.80184e+07	6.54305e+07		-1.04403e+07	-3.58157e+07	-3.55584e+07	-4.0728e+07	-1.50573e+08	-1.21526e+08	-1.39379e+08	-1.5491e+08
2098	2.15695e+06	-7.34921e+07	-2.05315e+07	-4.99601e+07	-1.41827e+08	9.60058e+06	-5.93977e+07	2.98079e+06	-3.96472e+07	-8.64636e+07	0	-6.62883e+07	0	-3.82895e+07	-1.04578e+08	-7.55757e+06	-7.5553e+07	3.68146e+06	-3.54206e+07	-1.1485e+08	2.76378e+07	-1.6333e+07	1.13048e+07	9.38972e+07	-5.4049e+07	3.98481e+07	9.33415e+07	-5.33867e+07	3.99549e+07	1.07267e+08	-6.03125e+07	4.69543e+07	1.5887e+08	-9.17218e+07	6.71484e+07	-1.30522e+08	-4.66155e+07	-6.4623e+07	-6.78953e+07	6.71484e+07		-1.05566e+07	-3.65182e+07	-3.60902e+07	-4.13213e+07	-1.52383e+08	-1.22982e+08	-1.40668e+08	-1.56171e+08
2099	2.95534e+06	-7.3746e+07	-2.14837e+07	-5.1159e+07	-1.43433e+08	9.62684e+06	-5.90247e+07	2.7994e+06	-4.08813e+07	-8.74798e+07	0	-6.56281e+07	0	-3.97034e+07	-1.05332e+08	-7.73976e+06	-7.46585e+07	3.53563e+06	-3.69914e+07	-1.15854e+08	2.80598e+07	-1.65658e+07	1.1494e+07	9.61304e+07	-5.5381e+07	4.07493e+07	9.51033e+07	-5.441e+07	4.06933e+07	1.09086e+08	-6.13668e+07	4.77195e+07	1.63097e+08	-9.42061e+07	6.88909e+07	-1.31939e+08	-4.67305e+07	-6.46382e+07	-6.81345e+07	6.88909e+07		-1.06897e+07	-3.72068e+07	-3.66393e+07	-4.18915e+07	-1.54123e+08	-1.24687e+08	-1.41971e+08	-1.57745e+08
2100	3.8223e+06	-7.39964e+07	-2.24317e+07	-5.23564e+07	-1.44962e+08	9.83283e+06	-5.86549e+07	2.98159e+06	-4.21133e+07	-8.79537e+07	0	-6.4969e+07	0	-4.11144e+07	-1.06083e+08	-7.6573e+06	-7.37503e+07	3.72628e+06	-3.85585e+07	-1.1624e+08	2.85381e+07	-1.68371e+07	1.1701e+07	9.79006e+07	-5.64008e+07	4.14997e+07	9.69215e+07	-5.54686e+07	4.14529e+07	1.1047e+08	-6.21283e+07	4.83416e+07	1.6738e+08	-9.67221e+07	7.0658e+07	-1.33261e+08	-4.6454e+07	-6.46305e+07	-6.78982e+07	7.0658e+07		-1.08396e+07	-3.77591e+07	-3.72055e+07	-4.23334e+07	-1.55802e+08	-1.25713e+08	-1.43289e+08	-1.58573e+08
2101	4.75013e+06	-7.42433e+07	-2.33758e+07	-5.35525e+07	-1.46421e+08	1.00145e+07	-5.82886e+07	3.16469e+06	-4.33431e+07	-8.84525e+07	0	-6.43171e+07	0	-4.25226e+07	-1.0684e+08	-7.84237e+06	-7.28322e+07	3.91791e+06	-4.0122e+07	-1.16879e+08	2.90729e+07	-1.71464e+07	1.19265e+07	1.00325e+08	-5.7851e+07	4.2474e+07	9.87961e+07	-5.65622e+07	4.22339e+07	1.12402e+08	-6.32517e+07	4.91504e+07	1.71719e+08	-9.92699e+07	7.24496e+07	-1.34495e+08	-4.59785e+07	-6.46058e+07	-6.77282e+07	7.24496e+07		-1.10063e+07	-3.85054e+07	-3.77889e+07	-4.2938e+07	-1.57428e+08	-1.26958e+08	-1.44629e+08	-1.59817e+08
2102	5.73189e+06	-7.4487e+07	-2.43167e+07	-5.47472e+07	-1.47819e+08	1.02101e+07	-5.91409e+07	3.00157e+06	-4.32147e+07	-8.91439e+07	0	-6.36659e+07	0	-4.3928e+07	-1.07594e+08	-8.04384e+06	-7.19073e+07	3.77036e+06	-4.1682e+07	-1.17863e+08	2.9664e+07	-1.74928e+07	1.21712e+07	1.02806e+08	-5.93365e+07	4.34691e+07	1.00727e+08	-5.76907e+07	4.30363e+07	1.14391e+08	-6.44121e+07	4.99786e+07	1.76115e+08	-1.01849e+08	7.42659e+07	-1.35648e+08	-4.56747e+07	-6.45575e+07	-6.78843e+07	7.42659e+07		-1.11898e+07	-3.92691e+07	-3.83896e+07	-4.35598e+07	-1.59009e+08	-1.28413e+08	-1.45983e+08	-1.61423e+08
2103	6.75771e+06	-7.47275e+07	-2.52547e+07	-5.59406e+07	-1.49165e+08	1.01667e+07	-6.01602e+07	2.84509e+06	-4.30901e+07	-9.02385e+07	0	-6.3022e+07	0	-4.53307e+07	-1.08353e+08	-7.97819e+06	-7.09846e+07	3.61554e+06	-4.32387e+07	-1.18586e+08	3.03115e+07	-1.7876e+07	1.24355e+07	1.0687e+08	-6.18659e+07	4.50042e+07	1.02714e+08	-5.8854e+07	4.38603e+07	1.15944e+08	-6.52803e+07	5.06632e+07	1.80567e+08	-1.0446e+08	7.61067e+07	-1.3673e+08	-4.52344e+07	-6.44924e+07	-6.79227e+07	7.61067e+07		-1.13902e+07	-4.05019e+07	-3.90074e+07	-4.40533e+07	-1.60555e+08	-1.3074e+08	-1.4736e+08	-1.62639e+08
2104	7.82187e+06	-7.4965e+07	-2.61901e+07	-5.71329e+07	-1.50466e+08	1.00812e+07	-6.13286e+07	3.03539e+06	-4.298e+07	-9.1192e+07	0	-6.2386e+07	0	-4.67309e+07	-1.09117e+08	-7.87749e+06	-7.00664e+07	3.80755e+06	-4.47921e+07	-1.18928e+08	3.10154e+07	-1.82955e+07	1.27198e+07	1.11018e+08	-6.4441e+07	4.6577e+07	1.04758e+08	-6.0052e+07	4.47059e+07	1.17526e+08	-6.61659e+07	5.13597e+07	1.85075e+08	-1.07103e+08	7.79722e+07	-1.37746e+08	-4.4615e+07	-6.4411e+07	-6.75687e+07	7.79722e+07		-1.16074e+07	-4.17606e+07	-3.96426e+07	-4.45559e+07	-1.62074e+08	-1.32953e+08	-1.4876e+08	-1.63484e+08
2105	8.91921e+06	-7.51996e+07	-2.71231e+07	-5.83241e+07	-1.51728e+08	9.97207e+06	-6.26307e+07	2.88232e+06	-4.28815e+07	-9.26579e+07	0	-6.17587e+07	0	-4.81285e+07	-1.09887e+08	-8.05783e+06	-6.91546e+07	3.66325e+06	-4.63422e+07	-1.19891e+08	3.17756e+07	-1.8751e+07	1.30246e+07	1.15742e+08	-6.73803e+07	4.83612e+07	1.06858e+08	-6.12846e+07	4.55733e+07	1.19683e+08	-6.74337e+07	5.22496e+07	1.8964e+08	-1.09778e+08	7.98622e+07	-1.38703e+08	-4.42967e+07	-6.43139e+07	-6.76418e+07	7.98622e+07		-1.18415e+07	-4.31907e+07	-4.0295e+07	-4.52292e+07	-1.63569e+08	-1.35849e+08	-1.50182e+08	-1.65121e+08
2106	1.00451e+07	-7.54313e+07	-2.80538e+07	-5.95142e+07	-1.52954e+08	9.84166e+06	-6.40532e+07	2.72835e+06	-4.27925e+07	-9.42757e+07	0	-6.11404e+07	0	-4.95236e+07	-1.10664e+08	-7.97364e+06	-6.82554e+07	3.51111e+06	-4.78892e+07	-1.20607e+08	3.25922e+07	-1.92423e+07	1.33499e+07	1.20002e+08	-6.99963e+07	5.00056e+07	1.09014e+08	-6.25518e+07	4.64625e+07	1.21405e+08	-6.84116e+07	5.29936e+07	1.94261e+08	-1.12484e+08	8.17767e+07	-1.39604e+08	-4.427e+07	-6.42015e+07	-6.76135e+07	8.17767e+07		-1.20926e+07	-4.44854e+07	-4.09648e+07	-4.57743e+07	-1.65047e+08	-1.38761e+08	-1.51629e+08	-1.66381e+08
2107	1.11953e+07	-7.56603e+07	-2.77051e+07	-6.07033e+07	-1.52873e+08	9.69196e+06	-6.55787e+07	2.92071e+06	-4.27113e+07	-9.56773e+07	0	-6.18954e+07	0	-4.93725e+07	-1.11268e+08	-7.85653e+06	-6.73621e+07	3.70537e+06	-4.94332e+07	-1.20946e+08	3.34652e+07	-1.9769e+07	1.36962e+07	1.24319e+08	-7.26338e+07	5.1685e+07	1.11227e+08	-6.38533e+07	4.73737e+07	1.23156e+08	-6.94059e+07	5.37504e+07	1.98938e+08	-1.15222e+08	8.37158e+07	-1.39177e+08	-4.39923e+07	-6.38942e+07	-6.7196e+07	8.37158e+07		-1.23605e+07	-4.5798e+07	-4.16518e+07	-4.63285e+07	-1.65234e+08	-1.41475e+08	-1.5292e+08	-1.67275e+08
2108	1.12137e+07	-7.58867e+07	-2.736e+07	-6.18915e+07	-1.53924e+08	9.62316e+06	-6.71964e+07	3.08635e+06	-4.26366e+07	-9.71234e+07	0	-6.28275e+07	0	-4.92257e+07	-1.12053e+08	-8.02224e+06	-6.6483e+07	3.90707e+06	-5.09742e+07	-1.21572e+08	3.63223e+07	-2.16084e+07	1.47139e+07	1.29211e+08	-7.56415e+07	5.35695e+07	1.15826e+08	-6.67332e+07	4.90928e+07	1.25483e+08	-7.07816e+07	5.47015e+07	2.03671e+08	-1.17992e+08	8.56795e+07	-1.39211e+08	-4.3554e+07	-6.29603e+07	-6.68708e+07	8.56795e+07		-1.32155e+07	-4.72821e+07	-4.30452e+07	-4.70535e+07	-1.6714e+08	-1.44405e+08	-1.55098e+08	-1.68626e+08
2109	1.09849e+07	-7.61105e+07	-2.70284e+07	-6.30788e+07	-1.55233e+08	9.63945e+06	-6.88967e+07	2.90531e+06	-4.25674e+07	-9.89193e+07	0	-6.39172e+07	0	-4.90952e+07	-1.13012e+08	-8.22466e+06	-6.56186e+07	3.76212e+06	-5.25123e+07	-1.22593e+08	3.92357e+07	-2.34774e+07	1.57583e+07	1.34054e+08	-7.8605e+07	5.54489e+07	1.20481e+08	-6.96407e+07	5.08406e+07	1.27893e+08	-7.22109e+07	5.56825e+07	2.08461e+08	-1.20793e+08	8.76678e+07	-1.39474e+08	-4.34704e+07	-6.21719e+07	-6.69109e+07	8.76678e+07		-1.4088e+07	-4.8753e+07	-4.44567e+07	-4.78039e+07	-1.69321e+08	-1.47672e+08	-1.57469e+08	-1.70397e+08
2110	1.05412e+07	-7.63318e+07	-2.67714e+07	-6.42652e+07	-1.56827e+08	9.83654e+06	-7.06706e+07	3.08784e+06	-4.25031e+07	-1.00249e+08	0	-6.5148e+07	0	-4.8978e+07	-1.14126e+08	-8.14571e+06	-6.47696e+07	3.95365e+06	-5.40476e+07	-1.23009e+08	4.22054e+07	-2.53659e+07	1.68395e+07	1.38434e+08	-8.12483e+07	5.71854e+07	1.25193e+08	-7.25638e+07	5.2629e+07	1.29841e+08	-7.33285e+07	5.65124e+07	2.13307e+08	-1.23627e+08	8.96805e+07	-1.39988e+08	-4.30639e+07	-6.1497e+07	-6.64969e+07	8.96805e+07		-1.49781e+07	-5.00885e+07	-4.58862e+07	-4.84182e+07	-1.71805e+08	-1.50338e+08	-1.60012e+08	-1.71427e+08
2111	1.00411e+07	-7.65506e+07	-2.65233e+07	-6.54509e+07	-1.58484e+08	1.00104e+07	-7.25101e+07	3.27134e+06	-4.2443e+07	-1.01671e+08	0	-6.65052e+07	0	-4.88716e+07	-1.15377e+08	-8.33218e+06	-6.39366e+07	4.1532e+06	-5.38802e+07	-1.21996e+08	4.49836e+07	-2.71123e+07	1.78713e+07	1.43467e+08	-8.4315e+07	5.91525e+07	1.29961e+08	-7.55056e+07	5.4455e+07	1.32337e+08	-7.48061e+07	5.75306e+07	2.18209e+08	-1.26492e+08	9.17178e+07	-1.40612e+08	-4.25188e+07	-6.09218e+07	-6.44652e+07	9.17178e+07		-1.58124e+07	-5.16187e+07	-4.73338e+07	-4.91951e+07	-1.74296e+08	-1.5329e+08	-1.62711e+08	-1.71191e+08
2112	9.36971e+06	-7.67671e+07	-2.62826e+07	-6.66359e+07	-1.60316e+08	1.01992e+07	-7.31631e+07	3.10856e+06	-4.37752e+07	-1.03631e+08	0	-6.79707e+07	0	-4.8774e+07	-1.16745e+08	-8.55245e+06	-6.46057e+07	4.00654e+06	-5.37174e+07	-1.22869e+08	4.78182e+07	-2.88835e+07	1.89346e+07	1.48558e+08	-8.74108e+07	6.11467e+07	1.34785e+08	-7.84687e+07	5.63159e+07	1.37481e+08	-7.80376e+07	5.94439e+07	2.23168e+08	-1.29388e+08	9.37797e+07	-1.41381e+08	-4.24838e+07	-6.04288e+07	-6.34252e+07	9.37797e+07		-1.66642e+07	-5.31671e+07	-4.87994e+07	-5.07564e+07	-1.7698e+08	-1.56798e+08	-1.65544e+08	-1.73625e+08
2113	8.68873e+06	-7.69813e+07	-2.60482e+07	-6.78202e+07	-1.62161e+08	1.02499e+07	-7.36993e+07	2.95243e+06	-4.51049e+07	-1.05602e+08	0	-6.95332e+07	0	-4.86838e+07	-1.18217e+08	-8.48891e+06	-6.54605e+07	3.8526e+06	-5.35727e+07	-1.23669e+08	5.0709e+07	-3.06823e+07	2.00267e+07	1.51089e+08	-8.87999e+07	6.22894e+07	1.39665e+08	-8.1455e+07	5.821e+07	1.42163e+08	-8.09502e+07	6.1213e+07	2.28183e+08	-1.32317e+08	9.5866e+07	-1.42134e+08	-4.33124e+07	-6.00071e+07	-6.24564e+07	9.5866e+07		-1.75335e+07	-5.39603e+07	-5.02832e+07	-5.21822e+07	-1.79694e+08	-1.59562e+08	-1.685e+08	-1.75852e+08
2114	8.00955e+06	-7.71932e+07	-2.58191e+07	-6.90039e+07	-1.64007e+08	1.02852e+07	-7.41307e+07	3.14308e+06	-4.6421e+07	-1.07123e+08	0	-7.11823e+07	0	-4.86e+07	-1.19782e+08	-8.38791e+06	-6.64801e+07	4.04551e+06	-5.34423e+07	-1.24265e+08	5.36561e+07	-3.25092e+07	2.11469e+07	1.53705e+08	-9.02412e+07	6.34635e+07	1.44601e+08	-8.44658e+07	6.01357e+07	1.46874e+08	-8.38584e+07	6.30156e+07	2.33254e+08	-1.35277e+08	9.79768e+07	-1.4286e+08	-4.366e+07	-5.96466e+07	-6.12492e+07	9.79768e+07		-1.84204e+07	-5.47789e+07	-5.1785e+07	-5.3618e+07	-1.82427e+08	-1.61902e+08	-1.71567e+08	-1.77883e+08
2115	7.34245e+06	-7.7403e+07	-2.55945e+07	-7.0187e+07	-1.65842e+08	1.0469e+07	-7.44672e+07	2.99035e+06	-4.77262e+07	-1.08734e+08	0	-7.29087e+07	0	-4.85215e+07	-1.2143e+08	-8.56868e+06	-6.76467e+07	3.9021e+06	-5.33238e+07	-1.25637e+08	5.66595e+07	-3.43651e+07	2.22944e+07	1.56896e+08	-9.20748e+07	6.48208e+07	1.49594e+08	-8.75024e+07	6.20919e+07	1.5216e+08	-8.7131e+07	6.50293e+07	2.38382e+08	-1.3827e+08	1.00112e+08	-1.43548e+08	-4.39134e+07	-5.93383e+07	-6.06078e+07	1.00112e+08		-1.93247e+07	-5.57686e+07	-5.3305e+07	-5.52254e+07	-1.85167e+08	-1.64503e+08	-1.74735e+08	-1.80862e+08
2116	6.6967e+06	-7.76106e+07	-2.53739e+07	-7.13697e+07	-1.67657e+08	1.06607e+07	-7.47171e+07	2.83671e+06	-4.90227e+07	-1.10242e+08	0	-7.47038e+07	0	-4.84479e+07	-1.23152e+08	-8.48263e+06	-6.89451e+07	3.75085e+06	-5.32148e+07	-1.26892e+08	5.97192e+07	-3.62504e+07	2.34687e+07	1.59624e+08	-9.36077e+07	6.60159e+07	1.54643e+08	-9.05656e+07	6.40778e+07	1.57011e+08	-9.00987e+07	6.69121e+07	2.43565e+08	-1.41294e+08	1.02272e+08	-1.44189e+08	-4.42264e+07	-5.90739e+07	-5.99797e+07	1.02272e+08		-2.02467e+07	-5.66224e+07	-5.48431e+07	-5.67056e+07	-1.87904e+08	-1.66865e+08	-1.77995e+08	-1.83597e+08
2117	6.0807e+06	-7.78161e+07	-2.5157e+07	-7.25519e+07	-1.69444e+08	1.08591e+07	-7.48873e+07	3.0294e+06	-5.03121e+07	-1.11311e+08	0	-7.65536e+07	0	-4.83785e+07	-1.24932e+08	-8.36172e+06	-7.03564e+07	3.946e+06	-5.3114e+07	-1.27886e+08	6.28352e+07	-3.81655e+07	2.46697e+07	1.62408e+08	-9.51803e+07	6.72277e+07	1.59749e+08	-9.3656e+07	6.60927e+07	1.6189e+08	-9.307e+07	6.88204e+07	2.48805e+08	-1.44349e+08	1.04456e+08	-1.44775e+08	-4.40832e+07	-5.88394e+07	-5.90657e+07	1.04456e+08		-2.11862e+07	-5.74936e+07	-5.63994e+07	-5.81958e+07	-1.9063e+08	-1.68804e+08	-1.81331e+08	-1.86082e+08
2118	5.42479e+06	-7.80195e+07	-2.49433e+07	-7.37337e+07	-1.71272e+08	1.08133e+07	-7.49841e+07	3.19538e+06	-5.15956e+07	-1.12571e+08	0	-7.84508e+07	0	-4.8313e+07	-1.26764e+08	-8.52387e+06	-7.18686e+07	4.14859e+06	-5.30199e+07	-1.29264e+08	6.60075e+07	-4.01106e+07	2.58968e+07	1.65768e+08	-9.71382e+07	6.86297e+07	1.6491e+08	-9.67743e+07	6.81361e+07	1.67345e+08	-9.64117e+07	7.09338e+07	2.54102e+08	-1.47437e+08	1.06665e+08	-1.45375e+08	-4.39414e+07	-5.86277e+07	-5.833e+07	1.06665e+08		-2.21433e+07	-5.85359e+07	-5.79738e+07	-5.98577e+07	-1.93415e+08	-1.71107e+08	-1.84738e+08	-1.89121e+08
2119	4.73387e+06	-7.8221e+07	-2.47326e+07	-7.49152e+07	-1.73135e+08	1.08147e+07	-7.50131e+07	3.01466e+06	-5.28743e+07	-1.14058e+08	0	-8.03886e+07	0	-4.8251e+07	-1.2864e+08	-8.7222e+06	-7.34709e+07	4.00452e+06	-5.29318e+07	-1.3112e+08	6.9236e+07	-4.2086e+07	2.71501e+07	1.69078e+08	-9.90643e+07	7.00141e+07	1.70128e+08	-9.99207e+07	7.02075e+07	1.72884e+08	-9.97971e+07	7.30868e+07	2.59454e+08	-1.50557e+08	1.08898e+08	-1.45985e+08	-4.40439e+07	-5.84322e+07	-5.80335e+07	1.08898e+08		-2.3118e+07	-5.95646e+07	-5.95664e+07	-6.15459e+07	-1.96253e+08	-1.73623e+08	-1.88206e+08	-1.92666e+08
2120	4.01242e+06	-7.84204e+07	-2.45247e+07	-7.60964e+07	-1.75029e+08	1.08137e+07	-7.49791e+07	3.19751e+06	-5.41489e+07	-1.15117e+08	0	-8.23607e+07	0	-4.81925e+07	-1.30553e+08	-8.63759e+06	-7.51535e+07	4.19694e+06	-5.28489e+07	-1.32443e+08	7.25209e+07	-4.40917e+07	2.84292e+07	1.71926e+08	-1.00681e+08	7.12453e+07	1.75402e+08	-1.03096e+08	7.23066e+07	1.7796e+08	-1.02862e+08	7.50974e+07	2.64863e+08	-1.53708e+08	1.11155e+08	-1.466e+08	-4.38714e+07	-5.82466e+07	-5.73456e+07	1.11155e+08		-2.41104e+07	-6.04574e+07	-6.11773e+07	-6.30988e+07	-1.99139e+08	-1.75574e+08	-1.9173e+08	-1.95542e+08
2121	3.2645e+06	-7.8618e+07	-2.43085e+07	-7.63891e+07	-1.76051e+08	1.07502e+07	-7.48867e+07	3.28834e+06	-5.45842e+07	-1.15432e+08	0	-8.43615e+07	0	-4.79584e+07	-1.3232e+08	-8.81898e+06	-7.69075e+07	4.2898e+06	-5.25832e+07	-1.3402e+08	7.58621e+07	-4.4979e+07	3.08831e+07	1.75428e+08	-1.01356e+08	7.40716e+07	1.80733e+08	-1.04361e+08	7.63717e+07	1.83583e+08	-1.04247e+08	7.93366e+07	2.70328e+08	-1.54754e+08	1.15574e+08	-1.45168e+08	-4.13607e+07	-5.59481e+07	-5.46832e+07	1.15574e+08		-2.41104e+07	-6.04574e+07	-6.11773e+07	-6.30988e+07	-2.00162e+08	-1.7589e+08	-1.93497e+08	-1.97119e+08
2122	2.49378e+06	-7.88137e+07	-2.4095e+07	-7.66778e+07	-1.77093e+08	1.06665e+07	-7.47402e+07	3.19107e+06	-5.50125e+07	-1.15895e+08	0	-8.49962e+07	0	-4.85738e+07	-1.3357e+08	-9.03388e+06	-7.87186e+07	4.1945e+06	-5.23214e+07	-1.35879e+08	7.92596e+07	-4.58737e+07	3.33859e+07	1.78986e+08	-1.02045e+08	7.69406e+07	1.86119e+08	-1.05629e+08	8.04908e+07	1.89291e+08	-1.05643e+08	8.36482e+07	2.7585e+08	-1.55805e+08	1.20045e+08	-1.43707e+08	-3.89546e+07	-5.30792e+07	-5.22311e+07	1.20045e+08		-2.41104e+07	-6.04574e+07	-6.11773e+07	-6.30988e+07	-2.01203e+08	-1.76353e+08	-1.94747e+08	-1.98978e+08
	Marginal domestic supply impact (HWP - existing forest + Aff_lo + BL)																				Hi_projection Marginal import impact - demand for IRW met by increased harvest elsewhere															Hi_projection Net impact (not including Marginal import Forest C)						Increased use of concrete - demand for IRW not met				Net impact
	50_35 + Aff35_lo					50_45 + Aff45_lo					50_50 + Aff50_lo					50_55 + Aff55_lo					50_35 + Aff35_lo			50_45 + Aff45_lo			50_50 + Aff50_lo			50_55 + Aff55_lo						50_35 + Aff35_lo	50_45 + Aff45_lo	50_50 + Aff50_lo	50_55 + Aff55_lo			50_35 + Aff35_lo	50_45 + Aff45_lo	50_50 + Aff50_lo	50_55 + Aff55_lo	50_35 + Aff35_hi	50_45 + Aff45_hi	50_50 + Aff50_hi	50_55 + Aff55_hi
	Ecosystem C		HWP		Total	Ecosystem C		HWP		Total	Ecosystem C		HWP		Total	Ecosystem C		HWP		Total	Ecosystem C	HWP	Total	Ecosystem C	HWP	Total	Ecosystem C	HWP	Total	Ecosystem C	HWP	Total	Reference
	Existing forest	New forest	Existing forest	New forest		Existing forest	New forest	Existing forest	New forest		Existing forest	New forest	Existing forest	New forest		Existing forest	New forest	Existing forest	New forest														Ecosystem C	HWP	Total
2023	0	-597398	0	0	-597398	267411	-595531	303742	0	-24378.2	0	-595531	0	0	-595531	0	-595531	303742	0	-291789	0	0	0	0	0	0	0	0	0	0	0	0				-597398	-24378.2	-595531	-291789			0	0	0	0	-597398	-24378.2	-595531	-291789
2024	-6736.99	-1.20374e+06	0	0	-1.21047e+06	556483	-1.19539e+06	298641	0	-340260	0	-1.19539e+06	0	0	-1.19539e+06	-273429	-1.19539e+06	298641	0	-1.17017e+06	60413.5	-36752.4	23661.1	559703	-340494	219209	60413.5	-36752.4	23661.1	559703	-340494	219209	As above			-1.18681e+06	-121051	-1.17172e+06	-950964			-23974.1	-222109	-23974.1	-222109	-1.23445e+06	-562370	-1.21936e+06	-1.39228e+06
2025	-23742.5	-1.82392e+06	0	0	-1.84766e+06	862466	-1.80221e+06	291102	0	-648645	0	-1.80221e+06	0	0	-1.80221e+06	-301540	-1.80221e+06	291102	0	-1.81265e+06	177116	-110505	66610.6	653557	-409146	244410	177116	-110505	66610.6	653557	-409146	244410				-1.78105e+06	-404235	-1.7356e+06	-1.56824e+06			-72431.3	-270108	-72431.3	-270108	-1.92009e+06	-918753	-1.87464e+06	-2.08276e+06
2026	-54067	-2.46247e+06	0	0	-2.51654e+06	1.18129e+06	-2.41861e+06	595115	0	-642210	0	-2.41861e+06	0	0	-2.41861e+06	-325277	-2.41861e+06	595115	0	-2.14877e+06	350107	-221217	128890	809648	-512319	297330	350107	-221217	128890	809648	-512319	297330				-2.38765e+06	-344880	-2.28972e+06	-1.85144e+06			-145880	-343000	-145880	-343000	-2.66242e+06	-985210	-2.56449e+06	-2.49177e+06
2027	-100329	-3.1236e+06	0	0	-3.22393e+06	1.50977e+06	-3.04715e+06	584932	0	-952442	0	-3.04715e+06	0	0	-3.04715e+06	-623235	-3.04715e+06	584932	0	-3.08545e+06	579387	-368926	210461	1.51452e+06	-964041	550475	579387	-368926	210461	1.51452e+06	-964041	550475				-3.01347e+06	-401967	-2.83669e+06	-2.53498e+06			-244830	-644093	-244830	-644093	-3.46876e+06	-1.59654e+06	-3.29198e+06	-3.72954e+06
2028	-164733	-3.81124e+06	0	0	-3.97597e+06	1.60724e+06	-3.69036e+06	569096	0	-1.51403e+06	0	-3.69036e+06	0	0	-3.69036e+06	-668048	-3.69036e+06	569096	0	-3.78931e+06	864955	-550291	314665	1.77517e+06	-1.1316e+06	643566	864955	-550291	314665	1.77517e+06	-1.1316e+06	643566				-3.66131e+06	-870461	-3.37569e+06	-3.14575e+06			-366351	-761694	-366351	-761694	-4.34232e+06	-2.27572e+06	-4.05671e+06	-4.55101e+06
2029	-249084	-4.52901e+06	0	0	-4.77809e+06	1.68858e+06	-4.35076e+06	869109	0	-1.79307e+06	0	-4.35076e+06	0	0	-4.35076e+06	-705614	-4.35076e+06	869109	0	-4.18726e+06	1.20681e+06	-767522	439291	2.09352e+06	-1.333e+06	760521	1.20681e+06	-767522	439291	2.09352e+06	-1.333e+06	760521				-4.3388e+06	-1.03255e+06	-3.91147e+06	-3.42674e+06			-513014	-904339	-513014	-904339	-5.29111e+06	-2.69741e+06	-4.86377e+06	-5.0916e+06
2030	-354807	-5.28028e+06	0	0	-5.63508e+06	1.75575e+06	-5.03081e+06	849121	0	-2.42593e+06	0	-5.03081e+06	0	0	-5.03081e+06	-1.01981e+06	-5.03081e+06	849121	0	-5.20149e+06	1.60496e+06	-1.01894e+06	586017	2.96312e+06	-1.88265e+06	1.08046e+06	1.60496e+06	-1.01894e+06	586017	2.96312e+06	-1.88265e+06	1.08046e+06				-5.04907e+06	-1.34547e+06	-4.44479e+06	-4.12103e+06			-680224	-1.26657e+06	-680224	-1.26657e+06	-6.31531e+06	-3.69251e+06	-5.71103e+06	-6.46807e+06
2031	-482969	-6.06813e+06	0	0	-6.5511e+06	1.81033e+06	-5.73294e+06	827254	0	-3.09536e+06	0	-5.73294e+06	0	0	-5.73294e+06	-1.07394e+06	-5.73294e+06	827254	0	-5.97963e+06	2.05939e+06	-1.30587e+06	753527	3.38535e+06	-2.14959e+06	1.23576e+06	2.05939e+06	-1.30587e+06	753527	3.38535e+06	-2.14959e+06	1.23576e+06				-5.79757e+06	-1.8596e+06	-4.97941e+06	-4.74387e+06			-872342	-1.45282e+06	-872342	-1.45282e+06	-7.42344e+06	-4.54818e+06	-6.60528e+06	-7.43245e+06
2032	-634319	-6.89541e+06	0	0	-7.52973e+06	1.85358e+06	-6.45952e+06	1.12564e+06	0	-3.4803e+06	0	-6.45952e+06	0	0	-6.45952e+06	-1.1187e+06	-6.45952e+06	1.12564e+06	0	-6.45258e+06	2.57012e+06	-1.62829e+06	941832	3.86451e+06	-2.45014e+06	1.41436e+06	2.57012e+06	-1.62829e+06	941832	3.86451e+06	-2.45014e+06	1.41436e+06				-6.5879e+06	-2.06594e+06	-5.51769e+06	-5.03821e+06			-1.08962e+06	-1.66411e+06	-1.08962e+06	-1.66411e+06	-8.61936e+06	-5.14441e+06	-7.54914e+06	-8.11668e+06
2033	-809318	-7.76471e+06	0	0	-8.57403e+06	2.15397e+06	-7.21283e+06	1.39752e+06	0	-3.66134e+06	0	-7.21283e+06	0	0	-7.21283e+06	-1.44309e+06	-7.21283e+06	1.39752e+06	0	-7.25841e+06	3.13713e+06	-1.98206e+06	1.15507e+06	4.90122e+06	-3.09997e+06	1.80125e+06	3.13713e+06	-1.98206e+06	1.15507e+06	4.90122e+06	-3.09997e+06	1.80125e+06				-7.41896e+06	-1.86009e+06	-6.05776e+06	-5.45716e+06			-1.32818e+06	-2.0972e+06	-1.32818e+06	-2.0972e+06	-9.9022e+06	-5.75854e+06	-8.54101e+06	-9.35561e+06
2034	-1.00818e+06	-8.67838e+06	0	0	-9.68656e+06	2.46666e+06	-7.9951e+06	1.36028e+06	0	-4.16817e+06	0	-7.9951e+06	0	0	-7.9951e+06	-1.77448e+06	-7.9951e+06	1.36028e+06	0	-8.40931e+06	3.76043e+06	-2.37052e+06	1.38991e+06	5.95498e+06	-3.76032e+06	2.19466e+06	3.76043e+06	-2.37052e+06	1.38991e+06	5.95498e+06	-3.76032e+06	2.19466e+06				-8.29665e+06	-1.97351e+06	-6.60519e+06	-6.21465e+06			-1.59158e+06	-2.54105e+06	-1.59158e+06	-2.54105e+06	-1.12781e+07	-6.70922e+06	-9.58668e+06	-1.09504e+07
2035	-1.2309e+06	-9.63858e+06	0	0	-1.08695e+07	2.78765e+06	-8.80845e+06	1.64619e+06	0	-4.3746e+06	0	-8.80845e+06	0	0	-8.80845e+06	-1.84949e+06	-8.80845e+06	1.64619e+06	0	-9.01175e+06	4.44002e+06	-2.79364e+06	1.64638e+06	6.583e+06	-4.14619e+06	2.43681e+06	4.44002e+06	-2.79364e+06	1.64638e+06	6.583e+06	-4.14619e+06	2.43681e+06				-9.22309e+06	-1.93779e+06	-7.16206e+06	-6.57494e+06			-1.88e+06	-2.81635e+06	-1.88e+06	-2.81635e+06	-1.27495e+07	-7.19095e+06	-1.06884e+07	-1.18281e+07
2036	-1.47729e+06	-1.06472e+07	0	0	-1.21245e+07	3.11357e+06	-9.6549e+06	1.90999e+06	0	-4.63134e+06	0	-9.6549e+06	0	0	-9.6549e+06	-2.20318e+06	-9.6549e+06	1.90999e+06	0	-9.94809e+06	5.1759e+06	-3.25137e+06	1.92453e+06	7.77617e+06	-4.88983e+06	2.88634e+06	5.1759e+06	-3.25137e+06	1.92453e+06	7.77617e+06	-4.88983e+06	2.88634e+06				-1.02e+07	-1.745e+06	-7.73036e+06	-7.06174e+06			-2.19363e+06	-3.32273e+06	-2.19363e+06	-3.32273e+06	-1.43182e+07	-7.95408e+06	-1.18485e+07	-1.32708e+07
2037	-1.74702e+06	-1.17061e+07	0	0	-1.34531e+07	3.44184e+06	-1.05364e+07	1.8594e+06	0	-5.23514e+06	0	-1.05364e+07	0	0	-1.05364e+07	-2.55863e+06	-1.05364e+07	1.8594e+06	0	-1.12356e+07	5.96807e+06	-3.74368e+06	2.22439e+06	8.9888e+06	-5.64594e+06	3.34286e+06	5.96807e+06	-3.74368e+06	2.22439e+06	8.9888e+06	-5.64594e+06	3.34286e+06				-1.12287e+07	-1.89228e+06	-8.31199e+06	-7.89275e+06			-2.53264e+06	-3.84118e+06	-2.53264e+06	-3.84118e+06	-1.59857e+07	-9.07632e+06	-1.3069e+07	-1.50768e+07
2038	-2.0396e+06	-1.28167e+07	0	0	-1.48563e+07	3.53232e+06	-1.14547e+07	1.80823e+06	0	-6.11417e+06	0	-1.14547e+07	0	0	-1.14547e+07	-2.64852e+06	-1.14547e+07	1.80823e+06	0	-1.2295e+07	6.81652e+06	-4.27056e+06	2.54596e+06	9.76779e+06	-6.12223e+06	3.64556e+06	6.81652e+06	-4.27056e+06	2.54596e+06	9.76779e+06	-6.12223e+06	3.64556e+06				-1.23103e+07	-2.46861e+06	-8.90876e+06	-8.64945e+06			-2.89722e+06	-4.18788e+06	-2.89722e+06	-4.18788e+06	-1.77535e+07	-1.0302e+07	-1.43519e+07	-1.64829e+07
2039	-2.45827e+06	-1.40334e+07	0	0	-1.64916e+07	3.60043e+06	-1.24116e+07	2.07179e+06	0	-6.73941e+06	0	-1.24116e+07	0	0	-1.24116e+07	-2.72013e+06	-1.24116e+07	2.07179e+06	0	-1.306e+07	7.72127e+06	-4.83199e+06	2.88928e+06	1.06034e+07	-6.63249e+06	3.97088e+06	7.72127e+06	-4.83199e+06	2.88928e+06	1.06034e+07	-6.63249e+06	3.97088e+06				-1.36024e+07	-2.76854e+06	-9.52235e+06	-9.08909e+06			-3.28754e+06	-4.56011e+06	-3.28754e+06	-4.56011e+06	-1.97792e+07	-1.12995e+07	-1.56992e+07	-1.76201e+07
2040	-2.98515e+06	-1.52911e+07	-67835.4	-27461.2	-1.83716e+07	3.64856e+06	-1.34087e+07	2.01776e+06	0	-7.74238e+06	0	-1.34087e+07	0	0	-1.34087e+07	-3.05849e+06	-1.34087e+07	2.01776e+06	0	-1.44494e+07	8.6823e+06	-5.42373e+06	3.25857e+06	1.19846e+07	-7.48602e+06	4.49858e+06	8.6823e+06	-5.42373e+06	3.25857e+06	1.19846e+07	-7.48602e+06	4.49858e+06				-1.5113e+07	-3.24381e+06	-1.01501e+07	-9.95086e+06			-3.69098e+06	-5.13844e+06	-3.69098e+06	-5.13844e+06	-2.20625e+07	-1.28808e+07	-1.70997e+07	-1.95879e+07
2041	-3.47445e+06	-1.66411e+07	-135996	-55054.2	-2.03066e+07	3.67872e+06	-1.44474e+07	1.96259e+06	0	-8.80613e+06	0	-1.44474e+07	0	0	-1.44474e+07	-3.12785e+06	-1.44474e+07	1.96259e+06	0	-1.56127e+07	9.35001e+06	-5.82726e+06	3.52274e+06	1.29239e+07	-8.05794e+06	4.86595e+06	9.69963e+06	-6.04968e+06	3.64995e+06	1.29239e+07	-8.05794e+06	4.86595e+06				-1.67838e+07	-3.94018e+06	-1.07975e+07	-1.07468e+07			-3.98138e+06	-5.54626e+06	-4.11962e+06	-5.54626e+06	-2.42879e+07	-1.43524e+07	-1.85671e+07	-2.1159e+07
2042	-4.0515e+06	-1.80835e+07	-204493	-82783.2	-2.24223e+07	3.69259e+06	-1.55292e+07	2.22604e+06	0	-9.61057e+06	0	-1.55292e+07	0	0	-1.55292e+07	-3.17971e+06	-1.55292e+07	2.22604e+06	0	-1.64829e+07	1.00743e+07	-6.26549e+06	3.80878e+06	1.39197e+07	-8.6629e+06	5.25676e+06	1.07732e+07	-6.70981e+06	4.06343e+06	1.39197e+07	-8.6629e+06	5.25676e+06				-1.86135e+07	-4.35381e+06	-1.14658e+07	-1.12261e+07			-4.29613e+06	-5.97921e+06	-4.57363e+06	-5.97921e+06	-2.67184e+07	-1.55898e+07	-2.01028e+07	-2.24621e+07
2043	-4.56411e+06	-1.95401e+07	-235511	-110425	-2.44501e+07	3.959e+06	-1.66176e+07	2.43445e+06	-16629.2	-1.02408e+07	0	-1.66176e+07	0	-16629.2	-1.66342e+07	-3.50378e+06	-1.66176e+07	2.46336e+06	-16629.2	-1.76746e+07	1.0855e+07	-6.73343e+06	4.12162e+06	1.54696e+07	-9.61105e+06	5.8585e+06	1.19031e+07	-7.39672e+06	4.50642e+06	1.54696e+07	-9.61105e+06	5.8585e+06				-2.03285e+07	-4.38227e+06	-1.21278e+07	-1.18161e+07			-4.62866e+06	-6.62479e+06	-5.04576e+06	-6.62479e+06	-2.90788e+07	-1.68656e+07	-2.168e+07	-2.42994e+07
2044	-5.09301e+06	-2.10101e+07	-266642	-138153	-2.65079e+07	4.31132e+06	-1.77457e+07	2.33554e+06	-33303.9	-1.11322e+07	0	-1.77457e+07	0	-33303.9	-1.7779e+07	-3.82802e+06	-1.77457e+07	2.4009e+06	-33303.9	-1.92061e+07	1.18145e+07	-7.31452e+06	4.49994e+06	1.68553e+07	-1.04529e+07	6.40238e+06	1.30135e+07	-8.06885e+06	4.9447e+06	1.69615e+07	-1.05205e+07	6.44101e+06				-2.2008e+07	-4.72978e+06	-1.28343e+07	-1.27651e+07			-5.03362e+06	-7.20921e+06	-5.51289e+06	-7.25118e+06	-3.15415e+07	-1.83414e+07	-2.32919e+07	-2.64573e+07
2045	-5.56397e+06	-2.2493e+07	-297890	-165972	-2.85208e+07	4.69092e+06	-1.89154e+07	2.57959e+06	-50026.5	-1.16949e+07	0	-1.89154e+07	0	-50026.5	-1.89654e+07	-3.90639e+06	-1.89154e+07	2.65259e+06	-50026.5	-2.02192e+07	1.28303e+07	-7.93039e+06	4.89987e+06	1.78182e+07	-1.10214e+07	6.79681e+06	1.41803e+07	-8.77453e+06	5.40576e+06	1.80579e+07	-1.11737e+07	6.88418e+06				-2.36209e+07	-4.89806e+06	-1.35596e+07	-1.3335e+07			-5.46314e+06	-7.62973e+06	-6.00492e+06	-7.72473e+06	-3.3984e+07	-1.93246e+07	-2.49703e+07	-2.79439e+07
2046	-5.97287e+06	-2.39882e+07	-329260	-193887	-3.04842e+07	5.03209e+06	-2.0128e+07	2.80155e+06	-66799.6	-1.23612e+07	0	-2.0128e+07	0	-66799.6	-2.01948e+07	-4.24338e+06	-2.0128e+07	2.88222e+06	-66799.6	-2.1556e+07	1.39024e+07	-8.58008e+06	5.32236e+06	1.94226e+07	-1.19962e+07	7.42646e+06	1.54034e+07	-9.51411e+06	5.88926e+06	1.96896e+07	-1.21649e+07	7.52475e+06				-2.51618e+07	-4.93472e+06	-1.43056e+07	-1.40312e+07			-5.91736e+06	-8.30619e+06	-6.52198e+06	-8.41254e+06	-3.64015e+07	-2.06674e+07	-2.67168e+07	-2.99685e+07
2047	-6.31614e+06	-2.54951e+07	-360755	-221900	-3.23939e+07	5.37186e+06	-2.1385e+07	2.71088e+06	-83625.5	-1.33858e+07	0	-2.1385e+07	0	-83625.5	-2.14686e+07	-4.57652e+06	-2.1385e+07	2.8067e+06	-83625.5	-2.32384e+07	1.5031e+07	-9.2635e+06	5.76748e+06	2.1047e+07	-1.29831e+07	8.06389e+06	1.66828e+07	-1.02874e+07	6.39533e+06	2.13413e+07	-1.31676e+07	8.17368e+06				-2.66265e+07	-5.32195e+06	-1.50733e+07	-1.50647e+07			-6.39639e+06	-8.9943e+06	-7.06421e+06	-9.11207e+06	-3.87903e+07	-2.23801e+07	-2.85328e+07	-3.23505e+07
2048	-6.66795e+06	-2.70538e+07	-392379	-250015	-3.43641e+07	5.47034e+06	-2.26872e+07	2.62727e+06	-100507	-1.46901e+07	0	-2.26872e+07	0	-100507	-2.27877e+07	-4.65572e+06	-2.26872e+07	2.72338e+06	-100507	-2.47201e+07	1.62159e+07	-9.98057e+06	6.23531e+06	2.22397e+07	-1.3691e+07	8.54867e+06	1.80185e+07	-1.10944e+07	6.92408e+06	2.25886e+07	-1.39088e+07	8.67977e+06				-2.81288e+07	-6.14146e+06	-1.58637e+07	-1.60403e+07			-6.90037e+06	-9.51546e+06	-7.63172e+06	-9.65552e+06	-4.12645e+07	-2.42056e+07	-3.04195e+07	-3.43756e+07
2049	-7.0277e+06	-2.86645e+07	-424135	-278237	-3.63946e+07	5.52642e+06	-2.40357e+07	2.85678e+06	-117446	-1.57699e+07	0	-2.40357e+07	0	-117446	-2.41531e+07	-4.69768e+06	-2.40357e+07	2.9532e+06	-117446	-2.58976e+07	1.74571e+07	-1.07312e+07	6.72592e+06	2.35162e+07	-1.44495e+07	9.06669e+06	1.94105e+07	-1.19349e+07	7.4756e+06	2.3865e+07	-1.46658e+07	9.19922e+06				-2.96687e+07	-6.70325e+06	-1.66775e+07	-1.66984e+07			-7.42942e+06	-1.00725e+07	-8.22464e+06	-1.02134e+07	-4.3824e+07	-2.58425e+07	-3.23778e+07	-3.6111e+07
2050	-7.39495e+06	-3.03278e+07	-453408	-304339	-3.84805e+07	5.55701e+06	-2.5431e+07	2.77144e+06	-133157	-1.72357e+07	0	-2.5431e+07	0	-133157	-2.55642e+07	-5.0018e+06	-2.5431e+07	2.875e+06	-133157	-2.7691e+07	1.87547e+07	-1.14904e+07	7.26435e+06	2.53368e+07	-1.55196e+07	9.81716e+06	2.08588e+07	-1.2781e+07	8.07787e+06	2.56856e+07	-1.57343e+07	9.95125e+06				-3.12161e+07	-7.41856e+06	-1.74863e+07	-1.77397e+07			-7.92076e+06	-1.07603e+07	-8.77294e+06	-1.09017e+07	-4.64012e+07	-2.79961e+07	-3.43371e+07	-3.85927e+07
2051	-7.7695e+06	-3.20438e+07	-482780	-330518	-4.06266e+07	5.56465e+06	-2.68737e+07	2.68514e+06	-148909	-1.87728e+07	0	-2.68737e+07	0	-148909	-2.70226e+07	-5.04956e+06	-2.68737e+07	2.78893e+06	-148909	-2.92832e+07	2.01087e+07	-1.22818e+07	7.82688e+06	2.6717e+07	-1.63138e+07	1.04032e+07	2.23635e+07	-1.36592e+07	8.70433e+06	2.7093e+07	-1.6544e+07	1.05489e+07				-3.27997e+07	-8.36962e+06	-1.83183e+07	-1.87343e+07			-8.43431e+06	-1.12938e+07	-9.34368e+06	-1.14455e+07	-4.90609e+07	-3.00666e+07	-3.63663e+07	-4.07287e+07
2052	-8.14678e+06	-3.38167e+07	-512255	-356778	-4.28325e+07	5.55148e+06	-2.837e+07	2.88268e+06	-164704	-2.01006e+07	0	-2.837e+07	0	-164704	-2.85347e+07	-5.06181e+06	-2.837e+07	3.01365e+06	-164704	-3.05829e+07	2.15189e+07	-1.31054e+07	8.41359e+06	2.81535e+07	-1.71388e+07	1.10147e+07	2.39244e+07	-1.45694e+07	9.35506e+06	2.85294e+07	-1.73679e+07	1.11616e+07				-3.44189e+07	-9.08589e+06	-1.91797e+07	-1.94213e+07			-8.97016e+06	-1.18497e+07	-9.93695e+06	-1.20019e+07	-5.18026e+07	-3.19502e+07	-3.84717e+07	-4.25848e+07
2053	-8.53109e+06	-3.56997e+07	-541837	-383122	-4.51558e+07	5.78676e+06	-2.99716e+07	3.05692e+06	-180543	-2.13084e+07	0	-2.99716e+07	0	-180543	-3.01521e+07	-5.34173e+06	-2.99716e+07	3.22206e+06	-180543	-3.22718e+07	2.29855e+07	-1.3961e+07	9.02451e+06	3.0037e+07	-1.82406e+07	1.17964e+07	2.55417e+07	-1.55116e+07	1.00301e+07	3.05189e+07	-1.85344e+07	1.19845e+07				-3.61313e+07	-9.51201e+06	-2.0122e+07	-2.02873e+07			-9.52838e+06	-1.25674e+07	-1.05528e+07	-1.27581e+07	-5.46841e+07	-3.38758e+07	-4.07049e+07	-4.50299e+07
2054	-8.92299e+06	-3.76061e+07	-571529	-409552	-4.75102e+07	6.10334e+06	-3.15912e+07	2.95131e+06	-196429	-2.2733e+07	0	-3.15912e+07	0	-196429	-3.17876e+07	-5.63691e+06	-3.15912e+07	3.1307e+06	-196429	-3.42938e+07	2.45085e+07	-1.48488e+07	9.65969e+06	3.19386e+07	-1.93512e+07	1.25874e+07	2.72153e+07	-1.64857e+07	1.07296e+07	3.25537e+07	-1.97266e+07	1.28271e+07				-3.78505e+07	-1.01456e+07	-2.10581e+07	-2.14668e+07			-1.01091e+07	-1.32946e+07	-1.11914e+07	-1.35337e+07	-5.76192e+07	-3.60276e+07	-4.2979e+07	-4.78275e+07
2055	-9.32297e+06	-3.9569e+07	-601334	-436073	-4.99294e+07	6.44448e+06	-3.32621e+07	3.15953e+06	-212364	-2.38704e+07	0	-3.32621e+07	0	-212364	-3.34744e+07	-5.66915e+06	-3.32621e+07	3.34627e+06	-212364	-3.57973e+07	2.60877e+07	-1.57685e+07	1.03192e+07	3.34968e+07	-2.02435e+07	1.32533e+07	2.89451e+07	-1.74917e+07	1.14534e+07	3.41664e+07	-2.06509e+07	1.35155e+07				-3.96102e+07	-1.06171e+07	-2.2021e+07	-2.22818e+07			-1.07123e+07	-1.39022e+07	-1.18528e+07	-1.41617e+07	-6.06418e+07	-3.77726e+07	-4.53273e+07	-4.9959e+07
2056	-9.73151e+06	-4.15885e+07	-631255	-462687	-5.2414e+07	6.74486e+06	-3.4984e+07	3.34627e+06	-228350	-2.51213e+07	0	-3.4984e+07	0	-228350	-3.52124e+07	-5.95632e+06	-3.4984e+07	3.54734e+06	-228350	-3.76214e+07	2.77233e+07	-1.67202e+07	1.10031e+07	3.56168e+07	-2.14819e+07	1.41349e+07	3.07313e+07	-1.85295e+07	1.22018e+07	3.63136e+07	-2.19037e+07	1.441e+07				-4.14109e+07	-1.09863e+07	-2.30106e+07	-2.32114e+07			-1.13382e+07	-1.4713e+07	-1.25371e+07	-1.49833e+07	-6.37522e+07	-3.98343e+07	-4.77495e+07	-5.26047e+07
2057	-1.01491e+07	-4.2489e+07	-1.86369e+06	-1.08741e+06	-5.55892e+07	7.04272e+06	-3.61628e+07	3.2349e+06	-244388	-2.61296e+07	0	-3.61628e+07	0	-244388	-3.64072e+07	-6.25553e+06	-3.61628e+07	3.4434e+06	-244388	-3.92194e+07	2.94151e+07	-1.77038e+07	1.17113e+07	3.77568e+07	-2.27305e+07	1.50264e+07	3.25738e+07	-1.95991e+07	1.29747e+07	3.85082e+07	-2.31837e+07	1.53245e+07				-4.38778e+07	-1.11032e+07	-2.34326e+07	-2.38949e+07			-1.19869e+07	-1.55343e+07	-1.32443e+07	-1.58252e+07	-6.7576e+07	-4.16639e+07	-4.96515e+07	-5.50446e+07
2058	-9.42738e+06	-4.33564e+07	-3.09172e+06	-1.70999e+06	-5.75855e+07	7.09688e+06	-3.73888e+07	3.12328e+06	-260481	-2.74292e+07	0	-3.73888e+07	0	-260481	-3.76493e+07	-6.28449e+06	-3.73888e+07	3.33231e+06	-260481	-4.06015e+07	2.827e+07	-1.69189e+07	1.13511e+07	3.94933e+07	-2.37227e+07	1.57706e+07	3.44726e+07	-2.07005e+07	1.37721e+07	4.02718e+07	-2.41905e+07	1.60813e+07				-4.62344e+07	-1.16586e+07	-2.38772e+07	-2.45202e+07			-1.16243e+07	-1.62148e+07	-1.39746e+07	-1.65166e+07	-6.92098e+07	-4.36439e+07	-5.16239e+07	-5.71181e+07
2059	-8.55866e+06	-4.41952e+07	-4.30548e+06	-2.3255e+06	-5.93848e+07	7.10638e+06	-3.86586e+07	3.31734e+06	-276630	-2.85115e+07	0	-3.86586e+07	0	-276630	-3.89352e+07	-6.27393e+06	-3.86586e+07	3.52692e+06	-276630	-4.16822e+07	2.71818e+07	-1.61726e+07	1.10092e+07	4.12861e+07	-2.47462e+07	1.65398e+07	3.64276e+07	-2.18335e+07	1.45941e+07	4.20645e+07	-2.52117e+07	1.68529e+07				-4.83757e+07	-1.19716e+07	-2.4341e+07	-2.48293e+07			-1.12802e+07	-1.69182e+07	-1.4728e+07	-1.72212e+07	-7.06651e+07	-4.54296e+07	-5.36632e+07	-5.89034e+07
2060	-7.56143e+06	-4.5009e+07	-5.50765e+06	-2.93529e+06	-6.10133e+07	7.08903e+06	-3.99683e+07	3.20354e+06	-292838	-2.99686e+07	0	-3.99683e+07	0	-292838	-4.02611e+07	-6.52529e+06	-3.99683e+07	3.42065e+06	-292838	-4.33658e+07	2.61504e+07	-1.54796e+07	1.06708e+07	4.36223e+07	-2.61069e+07	1.75154e+07	3.8439e+07	-2.29982e+07	1.54408e+07	4.44007e+07	-2.65701e+07	1.78305e+07				-5.03425e+07	-1.24532e+07	-2.48203e+07	-2.55352e+07			-1.09546e+07	-1.78186e+07	-1.55046e+07	-1.81228e+07	-7.1968e+07	-4.77872e+07	-5.57657e+07	-6.14886e+07
2061	-6.45183e+06	-4.57633e+07	-6.70035e+06	-3.54041e+06	-6.24559e+07	7.04749e+06	-4.12776e+07	3.08888e+06	-309106	-3.14503e+07	0	-4.12776e+07	0	-309106	-4.15867e+07	-6.51883e+06	-4.12776e+07	3.30661e+06	-309106	-4.47989e+07	2.51759e+07	-1.4836e+07	1.034e+07	4.55187e+07	-2.71912e+07	1.83275e+07	4.05067e+07	-2.41945e+07	1.63122e+07	4.63243e+07	-2.76695e+07	1.86548e+07				-5.21159e+07	-1.31228e+07	-2.52745e+07	-2.61441e+07			-1.06477e+07	-1.85656e+07	-1.63046e+07	-1.88807e+07	-7.31036e+07	-5.00159e+07	-5.78913e+07	-6.36796e+07
2062	-5.24409e+06	-4.64931e+07	-7.88518e+06	-4.14167e+06	-6.3764e+07	6.98405e+06	-4.26156e+07	3.28511e+06	-325436	-3.26719e+07	0	-4.26156e+07	0	-325436	-4.2941e+07	-6.47542e+06	-4.26156e+07	3.50348e+06	-325436	-4.5913e+07	2.42583e+07	-1.42384e+07	1.00199e+07	4.74714e+07	-2.83061e+07	1.91653e+07	4.26306e+07	-2.54224e+07	1.72082e+07	4.8277e+07	-2.87827e+07	1.94943e+07				-5.37441e+07	-1.35065e+07	-2.57328e+07	-2.64186e+07			-1.03594e+07	-1.93356e+07	-1.71279e+07	-1.96521e+07	-7.41234e+07	-5.20075e+07	-6.00689e+07	-6.5565e+07
2063	-3.95629e+06	-4.72008e+07	-9.06342e+06	-4.73969e+06	-6.49602e+07	7.16738e+06	-4.39773e+07	3.43122e+06	-341829	-3.37205e+07	0	-4.39773e+07	0	-341829	-4.43191e+07	-6.70014e+06	-4.39773e+07	3.68414e+06	-341829	-4.73351e+07	2.33974e+07	-1.36845e+07	9.71288e+06	4.99765e+07	-2.97634e+07	2.02131e+07	4.48109e+07	-2.6682e+07	1.81289e+07	5.0782e+07	-3.02382e+07	2.05438e+07				-5.52473e+07	-1.35074e+07	-2.61902e+07	-2.67914e+07			-1.00899e+07	-2.03063e+07	-1.79748e+07	-2.06239e+07	-7.50501e+07	-5.40268e+07	-6.22939e+07	-6.79591e+07
2064	-2.59982e+06	-4.79266e+07	-1.0236e+07	-5.33496e+06	-6.60974e+07	7.43043e+06	-4.53983e+07	3.27758e+06	-358288	-3.50485e+07	0	-4.53983e+07	0	-358288	-4.57566e+07	-6.94035e+06	-4.53983e+07	3.56514e+06	-358288	-4.91318e+07	2.25932e+07	-1.31723e+07	9.42086e+06	5.23939e+07	-3.1163e+07	2.12308e+07	4.70474e+07	-2.7973e+07	1.90744e+07	5.33324e+07	-3.17193e+07	2.16131e+07				-5.66765e+07	-1.38177e+07	-2.66821e+07	-2.75186e+07			-9.83923e+06	-2.12495e+07	-1.88452e+07	-2.1616e+07	-7.59366e+07	-5.6298e+07	-6.46018e+07	-7.07478e+07
2065	-1.18491e+06	-4.86402e+07	-1.14038e+07	-5.92788e+06	-6.71569e+07	7.71767e+06	-4.68442e+07	3.45784e+06	-374814	-3.60435e+07	0	-4.68442e+07	0	-374814	-4.7219e+07	-6.91671e+06	-4.68442e+07	3.75318e+06	-374814	-5.03825e+07	2.18457e+07	-1.27004e+07	9.14528e+06	5.43897e+07	-3.22947e+07	2.2095e+07	4.93403e+07	-2.92956e+07	2.00447e+07	5.54613e+07	-3.29322e+07	2.25291e+07				-5.80116e+07	-1.39485e+07	-2.71743e+07	-2.78534e+07			-9.60755e+06	-2.20458e+07	-1.97393e+07	-2.24614e+07	-7.67644e+07	-5.80893e+07	-6.69583e+07	-7.28439e+07
2066	279252	-4.93426e+07	-1.25674e+07	-6.51873e+06	-6.81494e+07	7.9639e+06	-4.83119e+07	3.61671e+06	-391408	-3.71227e+07	0	-4.83119e+07	0	-391408	-4.87033e+07	-7.14892e+06	-4.83119e+07	3.92681e+06	-391408	-5.19255e+07	2.11549e+07	-1.22676e+07	8.8873e+06	5.70254e+07	-3.38215e+07	2.32039e+07	5.16894e+07	-3.06497e+07	2.10398e+07	5.81242e+07	-3.44734e+07	2.36508e+07				-5.92621e+07	-1.39188e+07	-2.76636e+07	-2.82747e+07			-9.39491e+06	-2.3074e+07	-2.06571e+07	-2.35011e+07	-7.75443e+07	-6.01968e+07	-6.93605e+07	-7.54265e+07
2067	1.78435e+06	-5.00341e+07	-1.37271e+07	-7.10776e+06	-6.90847e+07	8.2075e+06	-4.91895e+07	3.47061e+06	-1.0463e+06	-3.85577e+07	0	-4.97986e+07	0	-408072	-5.02067e+07	-7.39373e+06	-4.97986e+07	3.79553e+06	-408072	-5.38049e+07	2.05208e+07	-1.18729e+07	8.64782e+06	5.96811e+07	-3.53588e+07	2.43223e+07	5.40949e+07	-3.20352e+07	2.20596e+07	6.08344e+07	-3.60417e+07	2.47927e+07				-6.04368e+07	-1.42353e+07	-2.81471e+07	-2.90122e+07			-9.20141e+06	-2.41137e+07	-2.15988e+07	-2.45619e+07	-7.82861e+07	-6.26713e+07	-7.18055e+07	-7.83668e+07
2068	3.31675e+06	-5.07151e+07	-1.48836e+07	-7.69517e+06	-6.99771e+07	8.3267e+06	-4.99996e+07	3.33128e+06	-1.69887e+06	-4.00405e+07	0	-5.12981e+07	0	-424808	-5.17229e+07	-7.36858e+06	-5.12981e+07	3.6572e+06	-424808	-5.54343e+07	1.99432e+07	-1.15157e+07	8.42755e+06	6.08816e+07	-3.59843e+07	2.48973e+07	5.65566e+07	-3.34523e+07	2.31043e+07	6.31141e+07	-3.73365e+07	2.57776e+07				-6.15495e+07	-1.51432e+07	-2.86186e+07	-2.96567e+07			-9.02712e+06	-2.46369e+07	-2.25644e+07	-2.5473e+07	-7.90042e+07	-6.46774e+07	-7.42873e+07	-8.09073e+07
2069	4.86958e+06	-5.13859e+07	-1.60369e+07	-8.2811e+06	-7.08343e+07	8.42743e+06	-5.07487e+07	3.49771e+06	-2.34386e+06	-4.11674e+07	0	-5.28076e+07	0	-441616	-5.32492e+07	-7.30473e+06	-5.28076e+07	3.82466e+06	-441616	-5.67292e+07	1.94223e+07	-1.11953e+07	8.22706e+06	6.21659e+07	-3.66604e+07	2.55055e+07	5.90746e+07	-3.49008e+07	2.41739e+07	6.54229e+07	-3.86456e+07	2.67774e+07				-6.26072e+07	-1.5662e+07	-2.90753e+07	-2.99519e+07			-8.87214e+06	-2.5192e+07	-2.3554e+07	-2.63981e+07	-7.97064e+07	-6.63595e+07	-7.68032e+07	-8.31273e+07
2070	6.43665e+06	-5.2049e+07	-1.71874e+07	-8.86569e+06	-7.16654e+07	8.67402e+06	-5.14443e+07	3.35637e+06	-2.98271e+06	-4.23966e+07	0	-5.43267e+07	0	-458500	-5.47852e+07	-7.50351e+06	-5.43267e+07	3.69134e+06	-458500	-5.85973e+07	1.8958e+07	-1.09112e+07	8.04682e+06	6.39933e+07	-3.76813e+07	2.6312e+07	6.1649e+07	-3.63807e+07	2.52683e+07	6.82748e+07	-4.02918e+07	2.79829e+07				-6.36186e+07	-1.60846e+07	-2.95169e+07	-3.06144e+07			-8.73655e+06	-2.59434e+07	-2.45678e+07	-2.75211e+07	-8.0402e+07	-6.834e+07	-7.93529e+07	-8.61184e+07
2071	8.01238e+06	-5.27008e+07	-1.83353e+07	-9.44904e+06	-7.24728e+07	8.92631e+06	-5.20868e+07	3.21425e+06	-3.61654e+06	-4.35628e+07	0	-5.58491e+07	0	-475459	-5.63246e+07	-7.44486e+06	-5.58491e+07	3.55034e+06	-475459	-6.02191e+07	1.85502e+07	-1.0663e+07	7.88719e+06	6.53814e+07	-3.84318e+07	2.69496e+07	6.42796e+07	-3.7892e+07	2.63875e+07	7.07144e+07	-4.16789e+07	2.90356e+07				-6.45856e+07	-1.66133e+07	-2.9937e+07	-3.11835e+07			-8.62045e+06	-2.65405e+07	-2.56057e+07	-2.85011e+07	-8.10932e+07	-7.01033e+07	-8.19302e+07	-8.87201e+07
2072	9.59172e+06	-5.33413e+07	-1.80022e+07	-1.00312e+07	-7.1783e+07	9.18323e+06	-5.268e+07	3.38151e+06	-4.2462e+06	-4.43615e+07	0	-5.66886e+07	0	-1.21912e+06	-5.79077e+07	-7.35019e+06	-5.73724e+07	3.74569e+06	-492496	-6.14694e+07	1.8199e+07	-1.04505e+07	7.74848e+06	6.68259e+07	-3.92179e+07	2.7608e+07	6.69665e+07	-3.94348e+07	2.75317e+07	7.31832e+07	-4.30796e+07	3.01036e+07				-6.40345e+07	-1.67535e+07	-3.03761e+07	-3.13658e+07			-8.52391e+06	-2.71599e+07	-2.66679e+07	-2.94953e+07	-8.03069e+07	-7.15214e+07	-8.45756e+07	-9.09647e+07
2073	9.78128e+06	-5.40215e+07	-1.76656e+07	-1.06083e+07	-7.25141e+07	9.17256e+06	-5.32249e+07	3.23363e+06	-4.87054e+06	-4.56893e+07	0	-5.74392e+07	0	-1.95941e+06	-5.93986e+07	-7.53878e+06	-5.88885e+07	3.63278e+06	-509417	-6.33039e+07	2.0237e+07	-1.1722e+07	8.51499e+06	6.87167e+07	-4.0269e+07	2.84478e+07	6.85026e+07	-4.02414e+07	2.82612e+07	7.62039e+07	-4.48053e+07	3.13986e+07				-6.39991e+07	-1.72415e+07	-3.11373e+07	-3.19054e+07			-9.27704e+06	-2.79257e+07	-2.7307e+07	-3.06736e+07	-8.17911e+07	-7.3615e+07	-8.67056e+07	-9.39775e+07
2074	9.69716e+06	-5.46866e+07	-1.73446e+07	-1.11841e+07	-7.35181e+07	9.20646e+06	-5.37283e+07	3.1044e+06	-5.49167e+06	-4.69091e+07	0	-5.81125e+07	0	-2.6908e+06	-6.08033e+07	-7.47155e+06	-6.03993e+07	3.51861e+06	-526412	-6.48786e+07	2.23313e+07	-1.30227e+07	9.30857e+06	7.01593e+07	-4.10411e+07	2.91183e+07	7.00952e+07	-4.10818e+07	2.90134e+07	7.88035e+07	-4.62652e+07	3.25383e+07				-6.42095e+07	-1.77909e+07	-3.179e+07	-3.23404e+07			-1.0053e+07	-2.85337e+07	-2.79683e+07	-3.17053e+07	-8.35711e+07	-7.54428e+07	-8.87716e+07	-9.6584e+07
2075	9.3764e+06	-5.53267e+07	-1.72267e+07	-1.1489e+07	-7.4666e+07	9.23573e+06	-5.41931e+07	3.19956e+06	-5.81525e+06	-4.75731e+07	0	-5.87155e+07	0	-3.07936e+06	-6.17949e+07	-7.38754e+06	-6.19031e+07	3.62195e+06	-543482	-6.62121e+07	2.44818e+07	-1.37212e+07	1.07605e+07	7.17368e+07	-4.14408e+07	3.0296e+07	7.17442e+07	-4.14868e+07	3.02574e+07	8.14594e+07	-4.69895e+07	3.44699e+07				-6.39055e+07	-1.72771e+07	-3.15375e+07	-3.17422e+07			-1.02329e+07	-2.87368e+07	-2.81764e+07	-3.19953e+07	-8.48989e+07	-7.63099e+07	-8.99713e+07	-9.82074e+07
2076	8.98121e+06	-5.59537e+07	-1.69913e+07	-1.20689e+07	-7.60328e+07	9.20049e+06	-5.46202e+07	3.06667e+06	-6.43109e+06	-4.87841e+07	0	-5.92523e+07	0	-3.79748e+06	-6.30497e+07	-7.56528e+06	-6.33964e+07	3.50423e+06	-560628	-6.80181e+07	2.64152e+07	-1.48888e+07	1.15264e+07	7.38754e+07	-4.26459e+07	3.12295e+07	7.34496e+07	-4.24056e+07	3.10441e+07	8.4649e+07	-4.88091e+07	3.58399e+07				-6.45063e+07	-1.75546e+07	-3.20057e+07	-3.21782e+07			-1.09571e+07	-2.95977e+07	-2.88824e+07	-3.32451e+07	-8.69899e+07	-7.83818e+07	-9.19321e+07	-1.01263e+08
2077	8.39982e+06	-5.649e+07	-1.67416e+07	-1.25635e+07	-7.73953e+07	9.1433e+06	-5.50122e+07	2.93565e+06	-6.96555e+06	-4.98988e+07	0	-5.97281e+07	0	-4.42171e+06	-6.41498e+07	-7.48324e+06	-6.41337e+07	3.37749e+06	-1.28069e+06	-6.95201e+07	2.8405e+07	-1.5943e+07	1.24619e+07	7.55566e+07	-4.34492e+07	3.21075e+07	7.52114e+07	-4.32403e+07	3.19711e+07	8.74085e+07	-5.01675e+07	3.72411e+07				-6.49334e+07	-1.77913e+07	-3.21788e+07	-3.22791e+07			-1.15676e+07	-3.01824e+07	-2.94898e+07	-3.41559e+07	-8.89629e+07	-8.00812e+07	-9.36397e+07	-1.03676e+08
2078	7.79632e+06	-5.70144e+07	-1.65212e+07	-1.31415e+07	-7.88808e+07	9.16379e+06	-5.54094e+07	3.11478e+06	-7.56165e+06	-5.06925e+07	0	-6.01857e+07	0	-5.11508e+06	-6.53007e+07	-7.36958e+06	-6.48099e+07	3.55803e+06	-2.079e+06	-7.07005e+07	3.0451e+07	-1.71601e+07	1.32909e+07	7.72907e+07	-4.43975e+07	3.28933e+07	7.70296e+07	-4.42321e+07	3.27976e+07	8.89096e+07	-5.09258e+07	3.79837e+07				-6.55899e+07	-1.77992e+07	-3.25032e+07	-3.27167e+07			-1.23374e+07	-3.09038e+07	-3.02408e+07	-3.48097e+07	-9.12182e+07	-8.15963e+07	-9.55415e+07	-1.0551e+08
2079	7.18409e+06	-5.75293e+07	-1.63064e+07	-1.37184e+07	-8.037e+07	9.17257e+06	-5.57837e+07	2.97056e+06	-8.15587e+06	-5.17964e+07	0	-6.05986e+07	0	-5.80477e+06	-6.64034e+07	-7.52513e+06	-6.54043e+07	3.41527e+06	-2.8675e+06	-7.23816e+07	3.25533e+07	-1.84043e+07	1.4149e+07	7.96618e+07	-4.57421e+07	3.39197e+07	7.8965e+07	-4.52969e+07	3.36682e+07	9.10203e+07	-5.20648e+07	3.89555e+07				-6.6221e+07	-1.78768e+07	-3.27352e+07	-3.34261e+07			-1.31301e+07	-3.18552e+07	-3.10361e+07	-3.56837e+07	-9.35e+07	-8.36517e+07	-9.74395e+07	-1.08065e+08
2080	6.57502e+06	-5.80348e+07	-1.60963e+07	-1.42943e+07	-8.18504e+07	9.33285e+06	-5.61358e+07	2.82518e+06	-8.74835e+06	-5.27261e+07	0	-6.09695e+07	0	-6.49124e+06	-6.74608e+07	-7.40129e+06	-6.59235e+07	3.27833e+06	-3.64798e+06	-7.36944e+07	3.47119e+07	-1.96766e+07	1.50353e+07	8.15695e+07	-4.67958e+07	3.47737e+07	8.09569e+07	-4.6396e+07	3.45608e+07	9.26678e+07	-5.29209e+07	3.97469e+07				-6.68151e+07	-1.79524e+07	-3.28999e+07	-3.39476e+07			-1.39457e+07	-3.26441e+07	-3.18541e+07	-3.63947e+07	-9.57961e+07	-8.53702e+07	-9.93149e+07	-1.10089e+08
2081	5.9797e+06	-5.85281e+07	-1.58903e+07	-1.48693e+07	-8.3308e+07	9.50358e+06	-5.64636e+07	3.0055e+06	-9.33919e+06	-5.32938e+07	0	-6.12979e+07	0	-7.17486e+06	-6.84727e+07	-7.27677e+06	-6.63706e+07	3.4602e+06	-4.42183e+06	-7.4609e+07	3.69268e+07	-2.09777e+07	1.59491e+07	8.35335e+07	-4.78802e+07	3.56533e+07	8.3005e+07	-4.75288e+07	3.54763e+07	9.43989e+07	-5.38314e+07	4.05675e+07				-6.73588e+07	-1.76404e+07	-3.29964e+07	-3.40414e+07			-1.47844e+07	-3.34557e+07	-3.2695e+07	-3.71378e+07	-9.80924e+07	-8.67495e+07	-1.01168e+08	-1.11747e+08
2082	5.40762e+06	-5.905e+07	-1.56878e+07	-1.54435e+07	-8.47736e+07	9.68305e+06	-5.67686e+07	2.86235e+06	-9.92848e+06	-5.41517e+07	0	-6.15863e+07	0	-7.85591e+06	-6.94422e+07	-7.42277e+06	-6.67511e+07	3.31866e+06	-5.19014e+06	-7.60453e+07	3.9198e+07	-2.23078e+07	1.68902e+07	8.60736e+07	-4.93222e+07	3.67514e+07	8.51096e+07	-4.86948e+07	3.64148e+07	9.66789e+07	-5.50877e+07	4.15912e+07				-6.78835e+07	-1.74003e+07	-3.30274e+07	-3.44541e+07			-1.56462e+07	-3.4476e+07	-3.35588e+07	-3.80795e+07	-1.0042e+08	-8.86277e+07	-1.03001e+08	-1.14125e+08
2083	4.79006e+06	-5.95615e+07	-1.54884e+07	-1.60168e+07	-8.62766e+07	9.62023e+06	-5.70519e+07	2.69102e+06	-1.05163e+07	-5.5257e+07	0	-6.18374e+07	0	-8.53462e+06	-7.0372e+07	-7.28967e+06	-6.70698e+07	3.18284e+06	-5.95372e+06	-7.71304e+07	4.15255e+07	-2.36675e+07	1.7858e+07	8.81504e+07	-5.04727e+07	3.76777e+07	8.72705e+07	-4.98938e+07	3.73767e+07	9.84956e+07	-5.60565e+07	4.2439e+07				-6.84186e+07	-1.75793e+07	-3.29953e+07	-3.46913e+07			-1.65312e+07	-3.5334e+07	-3.44455e+07	-3.88586e+07	-1.02808e+08	-9.05909e+07	-1.04818e+08	-1.15989e+08
2084	4.13268e+06	-6.00652e+07	-1.5292e+07	-1.65893e+07	-8.78138e+07	9.60623e+06	-5.73173e+07	2.84531e+06	-1.11027e+07	-5.59685e+07	0	-6.2056e+07	0	-9.21119e+06	-7.12672e+07	-7.15908e+06	-6.73339e+07	3.37273e+06	-6.71324e+06	-7.78335e+07	4.39093e+07	-2.50568e+07	1.88525e+07	9.01779e+07	-5.15879e+07	3.85899e+07	8.94878e+07	-5.11257e+07	3.83621e+07	1.00396e+08	-5.70764e+07	4.33195e+07				-6.89613e+07	-1.73786e+07	-3.29051e+07	-3.4514e+07			-1.74394e+07	-3.6177e+07	-3.53553e+07	-3.967e+07	-1.05253e+08	-9.21455e+07	-1.06622e+08	-1.17503e+08
2085	3.44058e+06	-6.05615e+07	-1.50703e+07	-1.71883e+07	-8.93794e+07	9.59135e+06	-5.75662e+07	2.68617e+06	-1.17213e+07	-5.70099e+07	0	-6.22446e+07	0	-9.92575e+06	-7.21703e+07	-7.31679e+06	-6.75475e+07	3.22136e+06	-7.51527e+06	-7.91582e+07	4.63494e+07	-2.65586e+07	1.97907e+07	9.27813e+07	-5.31364e+07	3.96449e+07	9.17614e+07	-5.2453e+07	3.93085e+07	1.02872e+08	-5.85241e+07	4.43482e+07				-6.95887e+07	-1.7365e+07	-3.28618e+07	-3.481e+07			-1.8174e+07	-3.69739e+07	-3.60546e+07	-4.04324e+07	-1.07553e+08	-9.39838e+07	-1.08225e+08	-1.19591e+08
2086	2.71838e+06	-6.10478e+07	-1.4851e+07	-1.77861e+07	-9.09665e+07	9.51532e+06	-5.77972e+07	2.52579e+06	-1.23382e+07	-5.80943e+07	0	-6.24028e+07	0	-1.06381e+07	-7.30409e+07	-7.18201e+06	-6.77119e+07	3.07579e+06	-8.31376e+06	-8.01319e+07	4.88457e+07	-2.80919e+07	2.07538e+07	9.49999e+07	-5.44269e+07	4.0573e+07	9.40914e+07	-5.38143e+07	4.02771e+07	1.04858e+08	-5.96452e+07	4.52129e+07				-7.02127e+07	-1.75213e+07	-3.27637e+07	-3.4919e+07			-1.89259e+07	-3.76579e+07	-3.67711e+07	-4.10507e+07	-1.09892e+08	-9.57521e+07	-1.09812e+08	-1.21183e+08
2087	1.97021e+06	-6.15226e+07	-1.46339e+07	-1.83829e+07	-9.25692e+07	9.4204e+06	-5.80093e+07	2.71144e+06	-1.29536e+07	-5.88311e+07	0	-6.25307e+07	0	-1.13483e+07	-7.3879e+07	-7.0502e+06	-6.78286e+07	3.27628e+06	-9.10904e+06	-8.07116e+07	5.13984e+07	-2.96568e+07	2.17415e+07	9.72749e+07	-5.57501e+07	4.15248e+07	9.64778e+07	-5.52096e+07	4.12682e+07	1.06928e+08	-6.08184e+07	4.61092e+07				-7.08277e+07	-1.73063e+07	-3.26108e+07	-3.46023e+07			-1.96953e+07	-3.83592e+07	-3.75051e+07	-4.16942e+07	-1.12265e+08	-9.71903e+07	-1.11384e+08	-1.22406e+08
2088	1.20336e+06	-6.19875e+07	-1.44189e+07	-1.89787e+07	-9.41818e+07	9.40595e+06	-5.81656e+07	2.87704e+06	-1.3585e+07	-5.94677e+07	0	-6.2634e+07	0	-1.20565e+07	-7.46905e+07	-7.20804e+06	-6.79047e+07	3.4699e+06	-9.90135e+06	-8.15442e+07	5.40073e+07	-3.12534e+07	2.2754e+07	1.00126e+08	-5.74524e+07	4.26734e+07	9.89205e+07	-5.66388e+07	4.22817e+07	1.09573e+08	-6.23726e+07	4.72004e+07				-7.14279e+07	-1.67943e+07	-3.24087e+07	-3.43437e+07			-2.04821e+07	-3.92314e+07	-3.82564e+07	-4.25086e+07	-1.14664e+08	-9.86991e+07	-1.12947e+08	-1.24053e+08
2089	524992	-6.24457e+07	-1.4206e+07	-1.95735e+07	-9.57002e+07	9.46021e+06	-5.83061e+07	2.69578e+06	-1.4215e+07	-6.0365e+07	0	-6.27178e+07	0	-1.27627e+07	-7.54805e+07	-7.37269e+06	-6.79464e+07	3.31669e+06	-1.06909e+07	-8.26933e+07	5.66726e+07	-3.28816e+07	2.3791e+07	1.02886e+08	-5.90909e+07	4.37955e+07	1.0142e+08	-5.81017e+07	4.33179e+07	1.12248e+08	-6.39435e+07	4.83041e+07				-7.19092e+07	-1.65695e+07	-3.21627e+07	-3.43892e+07			-2.12863e+07	-4.00778e+07	-3.90251e+07	-4.33325e+07	-1.16987e+08	-1.00443e+08	-1.14506e+08	-1.26026e+08
2090	-79106	-6.28974e+07	-1.39316e+07	-2.01673e+07	-9.70754e+07	9.69123e+06	-5.84329e+07	2.87802e+06	-1.48435e+07	-6.07071e+07	0	-6.27845e+07	0	-1.3467e+07	-7.62515e+07	-7.25735e+06	-6.79572e+07	3.51388e+06	-1.14779e+07	-8.31785e+07	5.93941e+07	-3.45414e+07	2.48527e+07	1.05184e+08	-6.04161e+07	4.47678e+07	1.03975e+08	-5.95983e+07	4.43766e+07	1.14459e+08	-6.5202e+07	4.9257e+07				-7.22228e+07	-1.59393e+07	-3.18749e+07	-3.39215e+07			-2.2108e+07	-4.07881e+07	-3.98112e+07	-4.40201e+07	-1.19183e+08	-1.01495e+08	-1.16063e+08	-1.27199e+08
2091	-751352	-6.33391e+07	-1.36592e+07	-2.07602e+07	-9.85098e+07	9.89514e+06	-5.85441e+07	3.06105e+06	-1.54705e+07	-6.10585e+07	0	-6.28321e+07	0	-1.41695e+07	-7.70017e+07	-7.44199e+06	-6.79362e+07	3.70491e+06	-1.22624e+07	-8.39357e+07	6.24194e+07	-3.63969e+07	2.60225e+07	1.08136e+08	-6.21709e+07	4.59647e+07	1.06587e+08	-6.11286e+07	4.54582e+07	1.17273e+08	-6.68564e+07	5.04171e+07				-7.24873e+07	-1.50937e+07	-3.15435e+07	-3.35186e+07			-2.30203e+07	-4.16925e+07	-4.06148e+07	-4.48868e+07	-1.2153e+08	-1.02751e+08	-1.17616e+08	-1.28822e+08
2092	-1.36332e+06	-6.376e+07	-1.46669e+07	-2.13658e+07	-1.01156e+08	1.01094e+07	-5.86414e+07	2.89773e+06	-1.60962e+07	-6.17305e+07	0	-6.28626e+07	0	-1.48703e+07	-7.77329e+07	-7.63044e+06	-6.78864e+07	3.54965e+06	-1.30445e+07	-8.50117e+07	6.5501e+07	-3.82834e+07	2.72176e+07	1.11144e+08	-6.39604e+07	4.71833e+07	1.09255e+08	-6.26923e+07	4.65625e+07	1.20117e+08	-6.85277e+07	5.15893e+07				-7.39384e+07	-1.45472e+07	-3.11704e+07	-3.34224e+07			-2.39502e+07	-4.26145e+07	-4.14357e+07	-4.57629e+07	-1.25106e+08	-1.04345e+08	-1.19169e+08	-1.30775e+08
2093	-911179	-6.41708e+07	-1.56707e+07	-2.19705e+07	-1.02723e+08	1.00828e+07	-5.87277e+07	2.74109e+06	-1.67206e+07	-6.26245e+07	0	-6.28376e+07	0	-1.55868e+07	-7.84244e+07	-7.53541e+06	-6.78121e+07	3.40113e+06	-1.38244e+07	-8.57707e+07	6.66886e+07	-3.89077e+07	2.7781e+07	1.13689e+08	-6.54369e+07	4.82519e+07	1.11979e+08	-6.42896e+07	4.76896e+07	1.22497e+08	-6.98868e+07	5.26107e+07				-7.49423e+07	-1.43726e+07	-3.07348e+07	-3.316e+07			-2.43211e+07	-4.34005e+07	-4.22742e+07	-4.65029e+07	-1.27044e+08	-1.06025e+08	-1.20699e+08	-1.32274e+08
2094	-387757	-6.4576e+07	-1.6661e+07	-2.25743e+07	-1.04199e+08	1.00117e+07	-5.88086e+07	2.93113e+06	-1.73437e+07	-6.32094e+07	0	-6.27984e+07	0	-1.63016e+07	-7.91e+07	-7.4392e+06	-6.77198e+07	3.59236e+06	-1.46021e+07	-8.61688e+07	6.79326e+07	-3.95677e+07	2.83649e+07	1.16317e+08	-6.69642e+07	4.93531e+07	1.14692e+08	-6.58751e+07	4.88167e+07	1.24962e+08	-7.12976e+07	5.36639e+07				-7.58341e+07	-1.38564e+07	-3.02832e+07	-3.25049e+07			-2.4709e+07	-4.42119e+07	-4.311e+07	-4.72684e+07	-1.28908e+08	-1.07421e+08	-1.2221e+08	-1.33437e+08
2095	188367	-6.42319e+07	-1.76404e+07	-2.3177e+07	-1.04861e+08	9.9155e+06	-5.8141e+07	2.77773e+06	-1.79655e+07	-6.34132e+07	0	-6.20034e+07	0	-1.70148e+07	-7.90182e+07	-7.61138e+06	-6.68681e+07	3.44022e+06	-1.53778e+07	-8.64171e+07	6.9233e+07	-4.02737e+07	2.89594e+07	1.19522e+08	-6.88714e+07	5.06502e+07	1.17461e+08	-6.74942e+07	4.99667e+07	1.27974e+08	-7.30711e+07	5.49031e+07				-7.59016e+07	-1.2763e+07	-2.90516e+07	-3.1514e+07			-2.5114e+07	-4.51944e+07	-4.39632e+07	-4.81968e+07	-1.29975e+08	-1.08608e+08	-1.22981e+08	-1.34614e+08
2096	800959	-6.37976e+07	-1.8611e+07	-2.37789e+07	-1.05386e+08	9.79678e+06	-5.73868e+07	2.62349e+06	-1.8586e+07	-6.35525e+07	0	-6.11134e+07	0	-1.77263e+07	-7.88398e+07	-7.50259e+06	-6.59178e+07	3.29427e+06	-1.61514e+07	-8.62775e+07	7.05898e+07	-4.10229e+07	2.95669e+07	1.22263e+08	-7.04681e+07	5.17948e+07	1.20286e+08	-6.91472e+07	5.1139e+07	1.30524e+08	-7.45348e+07	5.59888e+07				-7.58195e+07	-1.17578e+07	-2.77007e+07	-3.02887e+07			-2.5536e+07	-4.60409e+07	-4.4834e+07	-4.89891e+07	-1.30922e+08	-1.09593e+08	-1.23674e+08	-1.35267e+08
2097	1.43567e+06	-6.32839e+07	-1.95743e+07	-2.43799e+07	-1.05802e+08	9.65863e+06	-5.65533e+07	2.81552e+06	-1.92054e+07	-6.32846e+07	0	-6.01406e+07	0	-1.84363e+07	-7.85769e+07	-7.39462e+06	-6.48813e+07	3.48766e+06	-1.6923e+07	-8.57113e+07	7.2003e+07	-4.18134e+07	3.01896e+07	1.2506e+08	-7.20968e+07	5.29636e+07	1.23168e+08	-7.08339e+07	5.2334e+07	1.33157e+08	-7.60496e+07	5.71071e+07				-7.56128e+07	-1.0321e+07	-2.62429e+07	-2.86042e+07			-2.59751e+07	-4.69049e+07	-4.57222e+07	-4.9807e+07	-1.31777e+08	-1.10189e+08	-1.24299e+08	-1.35518e+08
2098	2.15695e+06	-6.34446e+07	-2.05315e+07	-2.49801e+07	-1.06799e+08	9.60058e+06	-5.63974e+07	2.98079e+06	-1.98236e+07	-6.36396e+07	0	-5.98427e+07	0	-1.91448e+07	-7.89874e+07	-7.55757e+06	-6.4475e+07	3.68146e+06	-1.77103e+07	-8.60614e+07	7.34725e+07	-4.26438e+07	3.08288e+07	1.28434e+08	-7.41047e+07	5.4329e+07	1.26106e+08	-7.25542e+07	5.35516e+07	1.36338e+08	-7.79264e+07	5.8412e+07				-7.59705e+07	-9.31062e+06	-2.54358e+07	-2.76494e+07			-2.64313e+07	-4.79399e+07	-4.6628e+07	-5.07878e+07	-1.3323e+08	-1.1158e+08	-1.25615e+08	-1.36849e+08
2099	2.95534e+06	-6.36288e+07	-2.14837e+07	-2.55795e+07	-1.07737e+08	9.62684e+06	-5.62682e+07	2.7994e+06	-2.04407e+07	-6.42826e+07	0	-5.95699e+07	0	-1.98517e+07	-7.94216e+07	-7.73976e+06	-6.40851e+07	3.53563e+06	-1.84957e+07	-8.67849e+07	7.49984e+07	-4.35127e+07	3.14857e+07	1.31758e+08	-7.60758e+07	5.56818e+07	1.291e+08	-7.43081e+07	5.47921e+07	1.39508e+08	-7.97918e+07	5.97164e+07				-7.6251e+07	-8.60086e+06	-2.46295e+07	-2.70685e+07			-2.69046e+07	-4.89614e+07	-4.75513e+07	-5.17661e+07	-1.34641e+08	-1.13244e+08	-1.26973e+08	-1.38551e+08
2100	3.8223e+06	-6.38331e+07	-2.24317e+07	-2.61782e+07	-1.08621e+08	9.83283e+06	-5.61623e+07	2.98159e+06	-2.10566e+07	-6.44045e+07	0	-5.93194e+07	0	-2.05572e+07	-7.98766e+07	-7.6573e+06	-6.371e+07	3.72628e+06	-1.92792e+07	-8.69203e+07	7.65807e+07	-4.44193e+07	3.21614e+07	1.34618e+08	-7.77335e+07	5.6885e+07	1.32151e+08	-7.60954e+07	5.60555e+07	1.42242e+08	-8.13625e+07	6.08798e+07				-7.64592e+07	-7.51957e+06	-2.38211e+07	-2.60405e+07			-2.7395e+07	-4.98469e+07	-4.84922e+07	-5.26165e+07	-1.36016e+08	-1.14251e+08	-1.28369e+08	-1.39537e+08
2101	4.75013e+06	-6.40545e+07	-2.33758e+07	-2.67762e+07	-1.09456e+08	1.00145e+07	-5.60772e+07	3.16469e+06	-2.16715e+07	-6.45695e+07	0	-5.90914e+07	0	-2.12613e+07	-8.03527e+07	-7.84237e+06	-6.3349e+07	3.91791e+06	-2.0061e+07	-8.73344e+07	7.82193e+07	-4.53628e+07	3.28565e+07	1.38133e+08	-7.98202e+07	5.83132e+07	1.35258e+08	-7.7916e+07	5.73418e+07	1.45525e+08	-8.32926e+07	6.22322e+07				-7.66e+07	-6.25627e+06	-2.3011e+07	-2.51023e+07			-2.79025e+07	-5.09268e+07	-4.94506e+07	-5.36298e+07	-1.37359e+08	-1.15496e+08	-1.29803e+08	-1.40964e+08
2102	5.73189e+06	-6.4291e+07	-2.43167e+07	-2.73736e+07	-1.10249e+08	1.02101e+07	-5.66179e+07	3.00157e+06	-2.16073e+07	-6.50136e+07	0	-5.88804e+07	0	-2.1964e+07	-8.08444e+07	-8.04384e+06	-6.30012e+07	3.77036e+06	-2.0841e+07	-8.81157e+07	7.99143e+07	-4.63427e+07	3.35716e+07	1.41705e+08	-8.19412e+07	5.97636e+07	1.38421e+08	-7.977e+07	5.86511e+07	1.48864e+08	-8.52575e+07	6.36061e+07				-7.66778e+07	-5.25004e+06	-2.21933e+07	-2.45096e+07			-2.84272e+07	-5.20243e+07	-5.04267e+07	-5.46608e+07	-1.38677e+08	-1.17038e+08	-1.31271e+08	-1.42777e+08
2103	6.75771e+06	-6.45392e+07	-2.52547e+07	-2.79703e+07	-1.11007e+08	1.01667e+07	-5.72555e+07	2.84509e+06	-2.15451e+07	-6.57888e+07	0	-5.86864e+07	0	-2.26654e+07	-8.13518e+07	-7.97819e+06	-6.26678e+07	3.61554e+06	-2.16194e+07	-8.86498e+07	8.16657e+07	-4.73585e+07	3.43072e+07	1.45836e+08	-8.44268e+07	6.14096e+07	1.41641e+08	-8.16572e+07	5.99835e+07	1.51767e+08	-8.69282e+07	6.48385e+07				-7.66993e+07	-4.3792e+06	-2.13683e+07	-2.38113e+07			-2.89691e+07	-5.32886e+07	-5.14203e+07	-5.5564e+07	-1.39976e+08	-1.19077e+08	-1.32772e+08	-1.44214e+08
2104	7.82187e+06	-6.47974e+07	-2.61901e+07	-2.85665e+07	-1.11732e+08	1.00812e+07	-5.79792e+07	3.03539e+06	-2.149e+07	-6.63527e+07	0	-5.85079e+07	0	-2.33654e+07	-8.18734e+07	-7.87749e+06	-6.23481e+07	3.80755e+06	-2.2396e+07	-8.88141e+07	8.34734e+07	-4.84097e+07	3.50637e+07	1.50052e+08	-8.69599e+07	6.30917e+07	1.44917e+08	-8.35777e+07	6.1339e+07	1.54699e+08	-8.86142e+07	6.60846e+07				-7.66685e+07	-3.26098e+06	-2.05343e+07	-2.27295e+07			-2.95282e+07	-5.45789e+07	-5.24315e+07	-5.64766e+07	-1.4126e+08	-1.20932e+08	-1.34305e+08	-1.45291e+08
2105	8.91921e+06	-6.50644e+07	-2.71231e+07	-2.91621e+07	-1.1243e+08	9.97207e+06	-5.878e+07	2.88232e+06	-2.14408e+07	-6.73664e+07	0	-5.8344e+07	0	-2.40642e+07	-8.24082e+07	-8.05783e+06	-6.20419e+07	3.66325e+06	-2.31711e+07	-8.96076e+07	8.53375e+07	-4.94962e+07	3.58413e+07	1.54842e+08	-8.98643e+07	6.4978e+07	1.48249e+08	-8.55312e+07	6.27177e+07	1.58207e+08	-9.06806e+07	6.7526e+07				-7.65891e+07	-2.38831e+06	-1.96905e+07	-2.20816e+07			-3.01045e+07	-5.60406e+07	-5.34604e+07	-5.75603e+07	-1.42535e+08	-1.23407e+08	-1.35869e+08	-1.47168e+08
2106	1.00451e+07	-6.53394e+07	-2.80538e+07	-2.97571e+07	-1.13105e+08	9.84166e+06	-5.96503e+07	2.72835e+06	-2.13962e+07	-6.84765e+07	0	-5.81939e+07	0	-2.47618e+07	-8.29557e+07	-7.97364e+06	-6.17514e+07	3.51111e+06	-2.39446e+07	-9.01585e+07	8.72579e+07	-5.06176e+07	3.66403e+07	1.5917e+08	-9.24511e+07	6.6719e+07	1.51638e+08	-8.7518e+07	6.41196e+07	1.61279e+08	-9.24553e+07	6.88234e+07				-7.6465e+07	-1.75759e+06	-1.88361e+07	-2.13351e+07			-3.0698e+07	-5.73669e+07	-5.4507e+07	-5.85163e+07	-1.43803e+08	-1.25843e+08	-1.37463e+08	-1.48675e+08
2107	1.11953e+07	-6.56214e+07	-2.77051e+07	-3.03517e+07	-1.12483e+08	9.69196e+06	-6.05805e+07	2.92071e+06	-2.13556e+07	-6.93235e+07	0	-5.87389e+07	0	-2.46862e+07	-8.34251e+07	-7.85653e+06	-6.14723e+07	3.70537e+06	-2.47166e+07	-9.034e+07	8.92346e+07	-5.17738e+07	3.74608e+07	1.63554e+08	-9.5064e+07	6.84901e+07	1.55082e+08	-8.95377e+07	6.55448e+07	1.6438e+08	-9.42446e+07	7.01353e+07				-7.5022e+07	-833350	-1.78803e+07	-2.02047e+07			-3.13087e+07	-5.87111e+07	-5.55712e+07	-5.94817e+07	-1.43792e+08	-1.28035e+08	-1.38996e+08	-1.49822e+08
2108	1.12137e+07	-6.59093e+07	-2.736e+07	-3.09457e+07	-1.13001e+08	9.62316e+06	-6.15642e+07	3.08635e+06	-2.13183e+07	-7.0173e+07	0	-5.93797e+07	0	-2.46128e+07	-8.39926e+07	-8.02224e+06	-6.12075e+07	3.90707e+06	-2.54871e+07	-9.08097e+07	9.31955e+07	-5.4242e+07	3.89535e+07	1.68514e+08	-9.80509e+07	7.04627e+07	1.59749e+08	-9.23626e+07	6.73862e+07	1.68057e+08	-9.64137e+07	7.1643e+07				-7.40479e+07	289774	-1.66064e+07	-1.91667e+07			-3.25068e+07	-6.02268e+07	-5.69976e+07	-6.06183e+07	-1.45508e+08	-1.304e+08	-1.4099e+08	-1.51428e+08
2109	1.09849e+07	-6.62022e+07	-2.70284e+07	-3.15394e+07	-1.13785e+08	9.63945e+06	-6.25953e+07	2.90531e+06	-2.12837e+07	-7.13342e+07	0	-6.01056e+07	0	-2.45476e+07	-8.46532e+07	-8.22466e+06	-6.09562e+07	3.76212e+06	-2.62562e+07	-9.16749e+07	9.72127e+07	-5.67391e+07	4.04735e+07	1.73424e+08	-1.00997e+08	7.24271e+07	1.64471e+08	-9.5217e+07	6.92542e+07	1.71817e+08	-9.86347e+07	7.31824e+07				-7.33116e+07	1.09287e+06	-1.5399e+07	-1.84926e+07			-3.37228e+07	-6.17294e+07	-5.84421e+07	-6.17807e+07	-1.47508e+08	-1.33064e+08	-1.43095e+08	-1.53456e+08
2110	1.05412e+07	-6.64992e+07	-2.67714e+07	-3.21326e+07	-1.14862e+08	9.83654e+06	-6.36686e+07	3.08784e+06	-2.12515e+07	-7.19957e+07	0	-6.09073e+07	0	-2.4489e+07	-8.53963e+07	-8.14571e+06	-6.07181e+07	3.95365e+06	-2.70238e+07	-9.1934e+07	1.01286e+08	-5.92552e+07	4.20309e+07	1.77871e+08	-1.03625e+08	7.42459e+07	1.6925e+08	-9.80952e+07	7.11548e+07	1.75114e+08	-1.00542e+08	7.45722e+07				-7.28311e+07	2.25017e+06	-1.42415e+07	-1.73618e+07			-3.49566e+07	-6.30966e+07	-5.99047e+07	-6.28073e+07	-1.49819e+08	-1.35092e+08	-1.45301e+08	-1.54741e+08
2111	1.00411e+07	-6.67997e+07	-2.65233e+07	-3.27255e+07	-1.16007e+08	1.00104e+07	-6.47795e+07	3.27134e+06	-2.12215e+07	-7.27192e+07	0	-6.1777e+07	0	-2.44358e+07	-8.62128e+07	-8.33218e+06	-6.04927e+07	4.1532e+06	-2.69401e+07	-9.16118e+07	1.05168e+08	-6.16285e+07	4.35395e+07	1.82972e+08	-1.06679e+08	7.6293e+07	1.74085e+08	-1.00999e+08	7.30864e+07	1.7896e+08	-1.02809e+08	7.61517e+07				-7.24679e+07	3.57387e+06	-1.31264e+07	-1.54601e+07			-3.61351e+07	-6.46585e+07	-6.13853e+07	-6.39971e+07	-1.52142e+08	-1.37378e+08	-1.47598e+08	-1.55609e+08
2112	9.36971e+06	-6.71032e+07	-2.62826e+07	-3.33179e+07	-1.17334e+08	1.01992e+07	-6.53012e+07	3.10856e+06	-2.18876e+07	-7.3881e+07	0	-6.2705e+07	0	-2.4387e+07	-8.7092e+07	-8.55245e+06	-6.10225e+07	4.00654e+06	-2.68587e+07	-9.24271e+07	1.09106e+08	-6.4026e+07	4.50802e+07	1.8813e+08	-1.09764e+08	7.83653e+07	1.78976e+08	-1.03929e+08	7.50478e+07	1.84172e+08	-1.05977e+08	7.81951e+07				-7.22538e+07	4.48428e+06	-1.20442e+07	-1.4232e+07			-3.73313e+07	-6.62386e+07	-6.2884e+07	-6.55921e+07	-1.54665e+08	-1.4012e+08	-1.49976e+08	-1.58019e+08
2113	8.68873e+06	-6.74095e+07	-2.60482e+07	-3.39101e+07	-1.18679e+08	1.02499e+07	-6.57685e+07	2.95243e+06	-2.25525e+07	-7.51185e+07	0	-6.36854e+07	0	-2.43419e+07	-8.80274e+07	-8.48891e+06	-6.16491e+07	3.8526e+06	-2.67863e+07	-9.30717e+07	1.13101e+08	-6.64506e+07	4.66501e+07	1.91776e+08	-1.11839e+08	7.99376e+07	1.83924e+08	-1.06886e+08	7.7038e+07	1.88921e+08	-1.08829e+08	8.00923e+07				-7.20289e+07	4.81905e+06	-1.09894e+07	-1.29794e+07			-3.85454e+07	-6.73734e+07	-6.44009e+07	-6.70518e+07	-1.57224e+08	-1.42492e+08	-1.52428e+08	-1.60124e+08
2114	8.00955e+06	-6.77178e+07	-2.58191e+07	-3.45019e+07	-1.20029e+08	1.02852e+07	-6.61866e+07	3.14308e+06	-2.32105e+07	-7.59688e+07	0	-6.47124e+07	0	-2.43e+07	-8.90124e+07	-8.38791e+06	-6.23613e+07	4.04551e+06	-2.67212e+07	-9.34248e+07	1.17151e+08	-6.89028e+07	4.82487e+07	1.95507e+08	-1.13964e+08	8.15426e+07	1.88928e+08	-1.09872e+08	7.90562e+07	1.93699e+08	-1.11685e+08	8.2014e+07				-7.17806e+07	5.57381e+06	-9.95614e+06	-1.14108e+07			-3.97773e+07	-6.85341e+07	-6.59358e+07	-6.85215e+07	-1.59807e+08	-1.44503e+08	-1.54948e+08	-1.61946e+08
2115	7.34245e+06	-6.80278e+07	-2.55945e+07	-3.50935e+07	-1.21373e+08	1.0469e+07	-6.65599e+07	2.99035e+06	-2.38631e+07	-7.69637e+07	0	-6.57807e+07	0	-2.42608e+07	-9.00414e+07	-8.56868e+06	-6.31497e+07	3.9021e+06	-2.66619e+07	-9.44781e+07	1.21259e+08	-7.13835e+07	4.9875e+07	1.99813e+08	-1.16475e+08	8.33378e+07	1.93988e+08	-1.12886e+08	8.1102e+07	1.99053e+08	-1.14913e+08	8.41397e+07				-7.14983e+07	6.37405e+06	-8.93944e+06	-1.03385e+07			-4.1027e+07	-6.9866e+07	-6.74889e+07	-7.01628e+07	-1.624e+08	-1.4683e+08	-1.5753e+08	-1.64641e+08
2116	6.6967e+06	-6.82972e+07	-2.53739e+07	-3.56849e+07	-1.22659e+08	1.06607e+07	-6.68505e+07	2.83671e+06	-2.45113e+07	-7.78644e+07	0	-6.68438e+07	0	-2.42239e+07	-9.10678e+07	-8.48263e+06	-6.39645e+07	3.75085e+06	-2.66074e+07	-9.53037e+07	1.25422e+08	-7.38932e+07	5.15287e+07	2.03656e+08	-1.18679e+08	8.49763e+07	1.99104e+08	-1.1593e+08	8.31748e+07	2.03971e+08	-1.17842e+08	8.61287e+07				-7.11306e+07	7.11189e+06	-7.89295e+06	-9.17495e+06			-4.22947e+07	-7.10624e+07	-6.90602e+07	-7.16768e+07	-1.64954e+08	-1.48927e+08	-1.60128e+08	-1.66981e+08
2117	6.0807e+06	-6.85613e+07	-2.5157e+07	-3.6276e+07	-1.23914e+08	1.08591e+07	-6.7097e+07	3.0294e+06	-2.5156e+07	-7.83645e+07	0	-6.79301e+07	0	-2.41892e+07	-9.21194e+07	-8.36172e+06	-6.48315e+07	3.946e+06	-2.6557e+07	-9.58042e+07	1.29641e+08	-7.64322e+07	5.32093e+07	2.07555e+08	-1.20919e+08	8.66359e+07	2.04277e+08	-1.19003e+08	8.52744e+07	2.08918e+08	-1.20779e+08	8.81386e+07				-7.07043e+07	8.27137e+06	-6.84501e+06	-7.66562e+06			-4.35803e+07	-7.22765e+07	-7.06497e+07	-7.32009e+07	-1.67494e+08	-1.50641e+08	-1.62769e+08	-1.69005e+08
2118	5.42479e+06	-6.88207e+07	-2.49433e+07	-3.68669e+07	-1.25206e+08	1.08133e+07	-6.7303e+07	3.19538e+06	-2.57978e+07	-7.90921e+07	0	-6.90363e+07	0	-2.41565e+07	-9.31928e+07	-8.52387e+06	-6.57452e+07	4.14859e+06	-2.651e+07	-9.66305e+07	1.33917e+08	-7.90009e+07	5.49165e+07	2.1203e+08	-1.23541e+08	8.84893e+07	2.09506e+08	-1.22106e+08	8.74003e+07	2.1444e+08	-1.2409e+08	9.03497e+07				-7.02895e+07	9.3972e+06	-5.79248e+06	-6.28079e+06			-4.48837e+07	-7.36621e+07	-7.22573e+07	-7.48968e+07	-1.7009e+08	-1.52754e+08	-1.6545e+08	-1.71527e+08
2119	4.73387e+06	-6.9117e+07	-2.47326e+07	-3.74576e+07	-1.26573e+08	1.08147e+07	-6.75131e+07	3.01466e+06	-2.64371e+07	-8.01209e+07	0	-7.02009e+07	0	-2.41255e+07	-9.43264e+07	-8.7222e+06	-6.6742e+07	4.00452e+06	-2.64659e+07	-9.79256e+07	1.3825e+08	-8.15994e+07	5.66502e+07	2.16455e+08	-1.26127e+08	9.03282e+07	2.14791e+08	-1.25239e+08	8.95525e+07	2.20046e+08	-1.27449e+08	9.25971e+07				-6.99232e+07	1.02073e+07	-4.77385e+06	-5.32851e+06			-4.62051e+07	-7.50344e+07	-7.38832e+07	-7.66189e+07	-1.72779e+08	-1.55155e+08	-1.6821e+08	-1.74545e+08
2120	4.01242e+06	-6.94148e+07	-2.45247e+07	-3.80482e+07	-1.27975e+08	1.08137e+07	-6.76941e+07	3.19751e+06	-2.70744e+07	-8.07573e+07	0	-7.1385e+07	0	-2.40962e+07	-9.54812e+07	-8.63759e+06	-6.77813e+07	4.19694e+06	-2.64244e+07	-9.86464e+07	1.42638e+08	-8.42279e+07	5.84101e+07	2.20418e+08	-1.28402e+08	9.20163e+07	2.20133e+08	-1.28402e+08	9.17308e+07	2.25189e+08	-1.3049e+08	9.46992e+07				-6.95652e+07	1.1259e+07	-3.75039e+06	-3.94721e+06			-4.75445e+07	-7.6271e+07	-7.55273e+07	-7.82058e+07	-1.7552e+08	-1.57028e+08	-1.71008e+08	-1.76852e+08
2121	3.2645e+06	-6.97149e+07	-2.43085e+07	-3.81946e+07	-1.28953e+08	1.07502e+07	-6.78492e+07	3.28834e+06	-2.72921e+07	-8.11028e+07	0	-7.25866e+07	0	-2.39792e+07	-9.65658e+07	-8.81898e+06	-6.88596e+07	4.2898e+06	-2.62916e+07	-9.96804e+07	1.47083e+08	-8.52766e+07	6.18061e+07	2.25034e+08	-1.29306e+08	9.5728e+07	2.25531e+08	-1.29558e+08	9.59731e+07	2.3088e+08	-1.31748e+08	9.91314e+07				-6.71474e+07	1.46252e+07	-592746	-548921			-4.75445e+07	-7.6271e+07	-7.55273e+07	-7.82058e+07	-1.76498e+08	-1.57374e+08	-1.72093e+08	-1.77886e+08
2122	2.49378e+06	-7.00166e+07	-2.4095e+07	-3.83389e+07	-1.29957e+08	1.06665e+07	-6.79798e+07	3.19107e+06	-2.75063e+07	-8.16285e+07	0	-7.31078e+07	0	-2.42869e+07	-9.73947e+07	-9.03388e+06	-6.9969e+07	4.1945e+06	-2.61607e+07	-1.00969e+08	1.51584e+08	-8.63306e+07	6.52532e+07	2.29707e+08	-1.30221e+08	9.94862e+07	2.30985e+08	-1.30717e+08	1.00268e+08	2.36655e+08	-1.33021e+08	1.03634e+08				-6.47035e+07	1.78576e+07	2.87315e+06	2.66492e+06			-4.75445e+07	-7.6271e+07	-7.55273e+07	-7.82058e+07	-1.77501e+08	-1.579e+08	-1.72922e+08	-1.79175e+08

## Sheet: Total_impact_lo (Aff35yrs)
Marginal impact results for low wood demand projection, all scenarios with 35-year afforestation duration																					Forest ecosystem C impact per tC harvested:		xxx
Units Mg CO2e
	Marginal domestic supply impact (HWP - existing forest + Aff_hi)																				Lo_projection Marginal import impact - demand for IRW met by increased harvest elsewhere															Lo_projection Net impact (not including Marginal import Forest C)						Increased use of concrete - demand for IRW not met				Net impact
	50_35 + Aff35_hi					50_45 + Aff45_hi					50_50 + Aff50_hi					50_55 + Aff55_hi					50_35 + Aff35_hi			50_45 + Aff45_hi			50_50 + Aff50_hi			50_55 + Aff55_hi			Reference			50_35 + Aff35_hi	50_45 + Aff45_hi	50_50 + Aff50_hi	50_55 + Aff55_hi	Reference		50_35 + Aff35_hi	50_45 + Aff45_hi	50_50 + Aff50_hi	50_55 + Aff55_hi	50_35 + Aff35_hi	50_45 + Aff45_hi	50_50 + Aff50_hi	50_55 + Aff55_hi
	Ecosystem C		HWP		Total	Ecosystem C		HWP		Total	Ecosystem C		HWP		Total	Ecosystem C		HWP		Total	Ecosystem C	HWP	Total	Ecosystem C	HWP	Total	Ecosystem C	HWP	Total	Ecosystem C	HWP	Total	Ecosystem C	HWP	Total
	Existing forest C	New forest C	Existing forest HWP	New forest HWP		Existing forest	New forest	Existing forest	New forest		Existing forest	New forest	Existing forest	New forest		Existing forest	New forest	Existing forest	New forest
2023	0	-596630	0	0	-596630	267411	-592896	303742	0	-21743.2	0	-592896	0	0	-592896	0	-592896	303742	0	-289154	0	0	0	0	0	0	0	0	0	0	0	0	0	0	0	-596630	-21743.2	-592896	-289154	0		0	0	0	0	-596630	-21743.2	-592896	-289154
2024	-6736.99	-1.20374e+06	0	0	-1.21048e+06	556483	-1.18704e+06	298641	0	-331915	0	-1.18704e+06	0	0	-1.18704e+06	-273429	-1.18704e+06	298641	0	-1.16183e+06	28893.4	-17577.2	11316.2	528183	-321319	206864	28893.4	-17577.2	11316.2	528183	-321319	206864	28893.4	-17577.2	11316.2	-1.19917e+06	-125051	-1.17572e+06	-954963	11316.2		-11465.9	-209601	-11465.9	-209601	-1.22195e+06	-541516	-1.19851e+06	-1.37143e+06
2025	-23742.5	-1.82875e+06	0	0	-1.85249e+06	862466	-1.78534e+06	291102	0	-631768	0	-1.78534e+06	0	0	-1.78534e+06	-301540	-1.78534e+06	291102	0	-1.79577e+06	84707.5	-52850.3	31857.2	561149	-351492	209657	84707.5	-52850.3	31857.2	561149	-351492	209657	84707.5	-52850.3	31857.2	-1.82064e+06	-422111	-1.75348e+06	-1.58612e+06	31857.2		-34641.1	-232318	-34641.1	-232318	-1.88713e+06	-864086	-1.81998e+06	-2.02809e+06
2026	-54067	-2.47878e+06	0	0	-2.53285e+06	1.18129e+06	-2.39106e+06	595115	0	-614661	0	-2.39106e+06	0	0	-2.39106e+06	-325277	-2.39106e+06	595115	0	-2.12122e+06	167442	-105799	61642.9	626984	-396901	230083	167442	-105799	61642.9	626984	-396901	230083	167442	-105799	61642.9	-2.47121e+06	-384579	-2.32942e+06	-1.89114e+06	61642.9		-69768.9	-266889	-69768.9	-266889	-2.60262e+06	-881550	-2.46083e+06	-2.38811e+06
2027	-100329	-3.16069e+06	0	0	-3.26102e+06	1.50977e+06	-3.00778e+06	584932	0	-913074	0	-3.00778e+06	0	0	-3.00778e+06	-623235	-3.00778e+06	584932	0	-3.04608e+06	277098	-176443	100655	1.21223e+06	-771558	440669	277098	-176443	100655	1.21223e+06	-771558	440669	277098	-176443	100655	-3.16037e+06	-472404	-2.90712e+06	-2.60541e+06	100655		-117093	-516356	-117093	-516356	-3.37812e+06	-1.42943e+06	-3.12487e+06	-3.56244e+06
2028	-164733	-3.88101e+06	0	0	-4.04574e+06	1.60724e+06	-3.63925e+06	569096	0	-1.46292e+06	0	-3.63925e+06	0	0	-3.63925e+06	-668048	-3.63925e+06	569096	0	-3.7382e+06	413674	-263183	150492	1.32389e+06	-844495	479394	413674	-263183	150492	1.32389e+06	-844495	479394	413674	-263183	150492	-3.89525e+06	-983524	-3.48876e+06	-3.25881e+06	150492		-175211	-570555	-175211	-570555	-4.22095e+06	-2.03347e+06	-3.81446e+06	-4.30876e+06
2029	-249084	-4.64589e+06	0	0	-4.89498e+06	1.68858e+06	-4.28938e+06	869109	0	-1.7317e+06	0	-4.28938e+06	0	0	-4.28938e+06	-705614	-4.28938e+06	869109	0	-4.12589e+06	577171	-367076	210096	1.46388e+06	-932552	531326	577171	-367076	210096	1.46388e+06	-932552	531326	577171	-367076	210096	-4.68488e+06	-1.20037e+06	-4.07929e+06	-3.59456e+06	210096		-245354	-636679	-245354	-636679	-5.14033e+06	-2.36838e+06	-4.53474e+06	-4.76257e+06
2030	-354807	-5.46113e+06	0	0	-5.81593e+06	1.75575e+06	-4.96219e+06	849121	0	-2.35732e+06	0	-4.96219e+06	0	0	-4.96219e+06	-1.01981e+06	-4.96219e+06	849121	0	-5.13288e+06	767589	-487320	280269	2.12575e+06	-1.35103e+06	774713	767589	-487320	280269	2.12575e+06	-1.35103e+06	774713	767589	-487320	280269	-5.53566e+06	-1.5826e+06	-4.68192e+06	-4.35816e+06	280269		-325324	-911675	-325324	-911675	-6.14126e+06	-3.26899e+06	-5.28752e+06	-6.04455e+06
2031	-482969	-6.3321e+06	0	0	-6.81507e+06	1.81033e+06	-5.66172e+06	827254	0	-3.02413e+06	0	-5.66172e+06	0	0	-5.66172e+06	-1.07394e+06	-5.66172e+06	827254	0	-5.9084e+06	984927	-624545	360383	2.31088e+06	-1.46827e+06	842613	984927	-624545	360383	2.31088e+06	-1.46827e+06	842613	984927	-624545	360383	-6.45468e+06	-2.18152e+06	-5.30133e+06	-5.06579e+06	360383		-417207	-997689	-417207	-997689	-7.23227e+06	-4.02182e+06	-6.07892e+06	-6.90609e+06
2032	-634319	-7.2638e+06	0	0	-7.89812e+06	1.85358e+06	-6.39201e+06	1.12564e+06	0	-3.41279e+06	0	-6.39201e+06	0	0	-6.39201e+06	-1.1187e+06	-6.39201e+06	1.12564e+06	0	-6.38507e+06	1.22919e+06	-778745	450441	2.52358e+06	-1.6006e+06	922973	1.22919e+06	-778745	450441	2.52358e+06	-1.6006e+06	922973	1.22919e+06	-778745	450441	-7.44767e+06	-2.48982e+06	-5.94157e+06	-5.46209e+06	450441		-521125	-1.09561e+06	-521125	-1.09561e+06	-8.41924e+06	-4.5084e+06	-6.91313e+06	-7.48067e+06
2033	-809318	-8.26083e+06	0	0	-9.07015e+06	2.15397e+06	-7.15708e+06	1.39752e+06	0	-3.60559e+06	0	-7.15708e+06	0	0	-7.15708e+06	-1.44309e+06	-7.15708e+06	1.39752e+06	0	-7.20266e+06	1.50037e+06	-947941	552425	3.26446e+06	-2.06585e+06	1.1986e+06	1.50037e+06	-947941	552425	3.26446e+06	-2.06585e+06	1.1986e+06	1.50037e+06	-947941	552425	-8.51773e+06	-2.40699e+06	-6.60466e+06	-6.00405e+06	552425		-635216	-1.40424e+06	-635216	-1.40424e+06	-9.70537e+06	-5.00983e+06	-7.7923e+06	-8.6069e+06
2034	-1.00818e+06	-9.32744e+06	0	0	-1.03356e+07	2.46666e+06	-7.96088e+06	1.36028e+06	0	-4.13395e+06	0	-7.96088e+06	0	0	-7.96088e+06	-1.77448e+06	-7.96088e+06	1.36028e+06	0	-8.37509e+06	1.79847e+06	-1.13373e+06	664738	3.99301e+06	-2.52352e+06	1.46949e+06	1.79847e+06	-1.13373e+06	664738	3.99301e+06	-2.52352e+06	1.46949e+06	1.79847e+06	-1.13373e+06	664738	-9.67088e+06	-2.66446e+06	-7.29614e+06	-6.90559e+06	664738		-761189	-1.71067e+06	-761189	-1.71067e+06	-1.10968e+07	-5.84461e+06	-8.72207e+06	-1.00858e+07
2035	-1.2309e+06	-1.04675e+07	0	0	-1.16984e+07	2.78765e+06	-8.80724e+06	1.64619e+06	0	-4.3734e+06	0	-8.80724e+06	0	0	-8.80724e+06	-1.84949e+06	-8.80724e+06	1.64619e+06	0	-9.01054e+06	2.12349e+06	-1.33609e+06	787400	4.26646e+06	-2.68864e+06	1.57783e+06	2.12349e+06	-1.33609e+06	787400	4.26646e+06	-2.68864e+06	1.57783e+06	2.12349e+06	-1.33609e+06	787400	-1.0911e+07	-2.79557e+06	-8.01984e+06	-7.43271e+06	787400		-899130	-1.83548e+06	-899130	-1.83548e+06	-1.25975e+07	-6.20888e+06	-9.70637e+06	-1.0846e+07
2036	-1.47729e+06	-1.16846e+07	0	0	-1.31619e+07	3.11357e+06	-9.69989e+06	1.90999e+06	0	-4.67634e+06	0	-9.69989e+06	0	0	-9.69989e+06	-2.20318e+06	-9.69989e+06	1.90999e+06	0	-9.99308e+06	2.47543e+06	-1.555e+06	920429	5.0757e+06	-3.19347e+06	1.88224e+06	2.47543e+06	-1.555e+06	920429	5.0757e+06	-3.19347e+06	1.88224e+06	2.47543e+06	-1.555e+06	920429	-1.22414e+07	-2.7941e+06	-8.77947e+06	-8.11085e+06	920429		-1.04913e+06	-2.17823e+06	-1.04913e+06	-2.17823e+06	-1.4211e+07	-6.85457e+06	-1.0749e+07	-1.21713e+07
2037	-1.74702e+06	-1.29818e+07	0	0	-1.47289e+07	3.44184e+06	-1.06424e+07	1.8594e+06	0	-5.34118e+06	0	-1.06424e+07	0	0	-1.06424e+07	-2.55863e+06	-1.06424e+07	1.8594e+06	0	-1.13416e+07	2.85429e+06	-1.79046e+06	1.06384e+06	5.87503e+06	-3.69271e+06	2.18231e+06	2.85429e+06	-1.79046e+06	1.06384e+06	5.87503e+06	-3.69271e+06	2.18231e+06	2.85429e+06	-1.79046e+06	1.06384e+06	-1.3665e+07	-3.15887e+06	-9.57859e+06	-9.15934e+06	1.06384e+06		-1.21126e+06	-2.5198e+06	-1.21126e+06	-2.5198e+06	-1.59401e+07	-7.86098e+06	-1.18537e+07	-1.38615e+07
2038	-2.0396e+06	-1.43622e+07	0	0	-1.64018e+07	3.53232e+06	-1.16383e+07	1.80823e+06	0	-6.29772e+06	0	-1.16383e+07	0	0	-1.16383e+07	-2.64852e+06	-1.16383e+07	1.80823e+06	0	-1.24786e+07	3.26008e+06	-2.04244e+06	1.21763e+06	6.21135e+06	-3.89411e+06	2.31723e+06	3.26008e+06	-2.04244e+06	1.21763e+06	6.21135e+06	-3.89411e+06	2.31723e+06	3.26008e+06	-2.04244e+06	1.21763e+06	-1.51842e+07	-3.98049e+06	-1.04206e+07	-1.01613e+07	1.21763e+06		-1.38563e+06	-2.67628e+06	-1.38563e+06	-2.67628e+06	-1.77874e+07	-8.974e+06	-1.30239e+07	-1.51548e+07
2039	-2.45827e+06	-1.59342e+07	0	0	-1.83925e+07	3.60043e+06	-1.26907e+07	2.07179e+06	0	-7.01848e+06	0	-1.26907e+07	0	0	-1.26907e+07	-2.72013e+06	-1.26907e+07	2.07179e+06	0	-1.3339e+07	3.69278e+06	-2.31095e+06	1.38183e+06	6.57488e+06	-4.11145e+06	2.46343e+06	3.69278e+06	-2.31095e+06	1.38183e+06	6.57488e+06	-4.11145e+06	2.46343e+06	3.69278e+06	-2.31095e+06	1.38183e+06	-1.70106e+07	-4.55505e+06	-1.13089e+07	-1.08756e+07	1.38183e+06		-1.5723e+06	-2.84487e+06	-1.5723e+06	-2.84487e+06	-1.99648e+07	-9.86335e+06	-1.4263e+07	-1.61839e+07
2040	-2.98515e+06	-1.75676e+07	-67835.4	-54922.4	-2.06755e+07	3.64856e+06	-1.38028e+07	2.01776e+06	0	-8.13649e+06	0	-1.38028e+07	0	0	-1.38028e+07	-3.05849e+06	-1.38028e+07	2.01776e+06	0	-1.48435e+07	4.15241e+06	-2.59396e+06	1.55845e+06	7.45471e+06	-4.65625e+06	2.79845e+06	4.15241e+06	-2.59396e+06	1.55845e+06	7.45471e+06	-4.65625e+06	2.79845e+06	4.15241e+06	-2.59396e+06	1.55845e+06	-1.91171e+07	-5.33804e+06	-1.22444e+07	-1.20451e+07	1.55845e+06		-1.76525e+06	-3.21271e+06	-1.76525e+06	-3.21271e+06	-2.24408e+07	-1.13492e+07	-1.55681e+07	-1.80563e+07
2041	-3.47445e+06	-1.93648e+07	-135996	-110108	-2.30854e+07	3.67872e+06	-1.49775e+07	1.96259e+06	0	-9.33623e+06	0	-1.49775e+07	0	0	-1.49775e+07	-3.12785e+06	-1.49775e+07	1.96259e+06	0	-1.61428e+07	4.18859e+06	-2.60682e+06	1.58177e+06	7.86321e+06	-4.90159e+06	2.96162e+06	4.63895e+06	-2.89332e+06	1.74563e+06	7.86321e+06	-4.90159e+06	2.96162e+06	4.63895e+06	-2.89332e+06	1.74563e+06	-2.15036e+07	-6.3746e+06	-1.32319e+07	-1.31812e+07	1.74563e+06		-1.79217e+06	-3.39689e+06	-1.97026e+06	-3.39689e+06	-2.48775e+07	-1.27331e+07	-1.69478e+07	-1.95397e+07
2042	-4.0515e+06	-2.13262e+07	-204493	-165566	-2.57478e+07	3.69259e+06	-1.62176e+07	2.22604e+06	0	-1.0299e+07	0	-1.62176e+07	0	0	-1.62176e+07	-3.17971e+06	-1.62176e+07	2.22604e+06	0	-1.71713e+07	4.25203e+06	-2.63668e+06	1.61535e+06	8.29884e+06	-5.16213e+06	3.13671e+06	5.15242e+06	-3.20904e+06	1.94338e+06	8.29884e+06	-5.16213e+06	3.13671e+06	5.15242e+06	-3.20904e+06	1.94338e+06	-2.41324e+07	-7.16228e+06	-1.42742e+07	-1.40346e+07	1.94338e+06		-1.82993e+06	-3.59297e+06	-2.18739e+06	-3.59297e+06	-2.75777e+07	-1.3892e+07	-1.8405e+07	-2.07642e+07
2043	-4.56411e+06	-2.32952e+07	-235511	-220849	-2.83157e+07	3.959e+06	-1.74503e+07	2.43445e+06	-33258.4	-1.10901e+07	0	-1.74503e+07	0	-33258.4	-1.74835e+07	-3.50378e+06	-1.74503e+07	2.46336e+06	-33258.4	-1.85239e+07	4.34269e+06	-2.68313e+06	1.65956e+06	9.25922e+06	-5.75189e+06	3.50733e+06	5.69281e+06	-3.53756e+06	2.15524e+06	9.25922e+06	-5.75189e+06	3.50733e+06	5.69281e+06	-3.53756e+06	2.15524e+06	-2.66561e+07	-7.58274e+06	-1.53283e+07	-1.50166e+07	2.15524e+06		-1.8759e+06	-3.99222e+06	-2.41319e+06	-3.99222e+06	-3.01916e+07	-1.50823e+07	-1.98967e+07	-2.25162e+07
2044	-5.09301e+06	-2.52705e+07	-266642	-276306	-3.09065e+07	4.31132e+06	-1.87418e+07	2.33554e+06	-66607.7	-1.21615e+07	0	-1.87418e+07	0	-66607.7	-1.88084e+07	-3.82802e+06	-1.87418e+07	2.4009e+06	-66607.7	-2.02355e+07	4.58267e+06	-2.82587e+06	1.7568e+06	9.96504e+06	-6.1791e+06	3.78594e+06	6.12326e+06	-3.79501e+06	2.32825e+06	1.00712e+07	-6.24666e+06	3.82457e+06	6.24541e+06	-3.87272e+06	2.37269e+06	-2.91497e+07	-8.37558e+06	-1.64801e+07	-1.64109e+07	2.37269e+06		-1.98106e+06	-4.29316e+06	-2.59684e+06	-4.33513e+06	-3.28875e+07	-1.64547e+07	-2.14052e+07	-2.45706e+07
2045	-5.56397e+06	-2.7251e+07	-297890	-331945	-3.34448e+07	4.69092e+06	-2.00958e+07	2.57959e+06	-100053	-1.29253e+07	0	-2.00958e+07	0	-100053	-2.01959e+07	-3.90639e+06	-2.00958e+07	2.65259e+06	-100053	-2.14496e+07	4.84972e+06	-2.98644e+06	1.86329e+06	1.02186e+07	-6.31554e+06	3.90306e+06	6.58072e+06	-4.06871e+06	2.51201e+06	1.04583e+07	-6.46786e+06	3.99043e+06	6.82494e+06	-4.22387e+06	2.60107e+06	-3.15816e+07	-9.02228e+06	-1.76838e+07	-1.74592e+07	2.60107e+06		-2.09747e+06	-4.41698e+06	-2.79217e+06	-4.51198e+06	-3.55423e+07	-1.73423e+07	-2.2988e+07	-2.59616e+07
2046	-5.97287e+06	-2.92358e+07	-329260	-387774	-3.59257e+07	5.03209e+06	-2.15155e+07	2.80155e+06	-133599	-1.38155e+07	0	-2.15155e+07	0	-133599	-2.16491e+07	-4.24338e+06	-2.15155e+07	2.88222e+06	-133599	-2.30103e+07	5.14383e+06	-3.16382e+06	1.98001e+06	1.10844e+07	-6.84141e+06	4.24303e+06	7.06517e+06	-4.35934e+06	2.70583e+06	1.13514e+07	-7.0101e+06	4.34132e+06	7.4314e+06	-4.59108e+06	2.84031e+06	-3.39457e+07	-9.57243e+06	-1.89433e+07	-1.86689e+07	2.84031e+06		-2.2252e+06	-4.78345e+06	-2.99925e+06	-4.8898e+06	-3.81509e+07	-1.85989e+07	-2.46483e+07	-2.79001e+07
2047	-6.31614e+06	-3.1224e+07	-360755	-443800	-3.83446e+07	5.37186e+06	-2.30036e+07	2.71088e+06	-167251	-1.50881e+07	0	-2.30036e+07	0	-167251	-2.31708e+07	-4.57652e+06	-2.30036e+07	2.8067e+06	-167251	-2.49406e+07	5.46497e+06	-3.35787e+06	2.10711e+06	1.19409e+07	-7.36239e+06	4.57847e+06	7.5766e+06	-4.66669e+06	2.90991e+06	1.22351e+07	-7.54686e+06	4.68826e+06	8.06478e+06	-4.97431e+06	3.09047e+06	-3.62375e+07	-1.05096e+07	-2.02609e+07	-2.02524e+07	3.09047e+06		-2.36431e+06	-5.14822e+06	-3.21813e+06	-5.266e+06	-4.0709e+07	-2.02363e+07	-2.6389e+07	-3.02066e+07
2048	-6.66795e+06	-3.32954e+07	-392379	-500031	-4.08557e+07	5.47034e+06	-2.45623e+07	2.62727e+06	-201014	-1.66657e+07	0	-2.45623e+07	0	-201014	-2.47633e+07	-4.65572e+06	-2.45623e+07	2.72338e+06	-201014	-2.66957e+07	5.81314e+06	-3.56847e+06	2.24467e+06	1.23362e+07	-7.58725e+06	4.74899e+06	8.11501e+06	-4.99061e+06	3.1244e+06	1.26851e+07	-7.80504e+06	4.88009e+06	8.7251e+06	-5.37353e+06	3.35157e+06	-3.86111e+07	-1.19167e+07	-2.16389e+07	-2.18156e+07	3.35157e+06		-2.51485e+06	-5.33262e+06	-3.44888e+06	-5.47269e+06	-4.33706e+07	-2.19983e+07	-2.82122e+07	-3.21683e+07
2049	-7.0277e+06	-3.54512e+07	-424135	-556473	-4.34595e+07	5.52642e+06	-2.61936e+07	2.85678e+06	-234891	-1.80453e+07	0	-2.61936e+07	0	-234891	-2.64285e+07	-4.69768e+06	-2.61936e+07	2.9532e+06	-234891	-2.8173e+07	6.18832e+06	-3.79555e+06	2.39277e+06	1.27861e+07	-7.84555e+06	4.94052e+06	8.68038e+06	-5.33095e+06	3.34943e+06	1.31349e+07	-8.06183e+06	5.07305e+06	9.41233e+06	-5.7887e+06	3.62363e+06	-4.10668e+07	-1.31048e+07	-2.30791e+07	-2.30999e+07	3.62363e+06		-2.67689e+06	-5.53944e+06	-3.69156e+06	-5.68029e+06	-4.61364e+07	-2.35847e+07	-3.01201e+07	-3.38533e+07
2050	-7.39495e+06	-3.76926e+07	-453408	-608678	-4.61496e+07	5.55701e+06	-2.78991e+07	2.77144e+06	-266314	-1.9837e+07	0	-2.78991e+07	0	-266314	-2.81654e+07	-5.0018e+06	-2.78991e+07	2.875e+06	-266314	-3.02922e+07	6.5905e+06	-4.03105e+06	2.55946e+06	1.37507e+07	-8.41469e+06	5.336e+06	9.27271e+06	-5.676e+06	3.59671e+06	1.40994e+07	-8.62934e+06	5.47009e+06	1.01265e+07	-6.2061e+06	3.9204e+06	-4.35902e+07	-1.4501e+07	-2.45687e+07	-2.48221e+07	3.9204e+06		-2.83043e+06	-5.90439e+06	-3.917e+06	-6.04578e+06	-4.89801e+07	-2.57414e+07	-3.20824e+07	-3.6338e+07
2051	-7.7695e+06	-4.00203e+07	-482780	-661037	-4.89336e+07	5.56465e+06	-2.968e+07	2.68514e+06	-297819	-2.1728e+07	0	-2.968e+07	0	-297819	-2.99778e+07	-5.04956e+06	-2.968e+07	2.78893e+06	-297819	-3.22385e+07	7.01968e+06	-4.28234e+06	2.73734e+06	1.42455e+07	-8.69133e+06	5.55415e+06	9.89201e+06	-6.03672e+06	3.85529e+06	1.46215e+07	-8.92161e+06	5.69987e+06	1.08676e+07	-6.63879e+06	4.2288e+06	-4.61963e+07	-1.61739e+07	-2.61225e+07	-2.65386e+07	4.2288e+06		-2.99426e+06	-6.10316e+06	-4.15301e+06	-6.25485e+06	-5.19279e+07	-2.78312e+07	-3.41308e+07	-3.84933e+07
2052	-8.14678e+06	-4.24351e+07	-512255	-713557	-5.18077e+07	5.55148e+06	-3.15418e+07	2.88268e+06	-329408	-2.34371e+07	0	-3.15418e+07	0	-329408	-3.18712e+07	-5.06181e+06	-3.15418e+07	3.01365e+06	-329408	-3.39194e+07	7.47584e+06	-4.54937e+06	2.92647e+06	1.47673e+07	-8.98244e+06	5.78487e+06	1.05383e+07	-6.41302e+06	4.12524e+06	1.51433e+07	-9.21151e+06	5.93175e+06	1.16356e+07	-7.08676e+06	4.54885e+06	-4.88812e+07	-1.76522e+07	-2.7746e+07	-2.79877e+07	4.54885e+06		-3.16841e+06	-6.31236e+06	-4.39965e+06	-6.46463e+06	-5.49761e+07	-2.97494e+07	-3.62709e+07	-4.0384e+07
2053	-8.53109e+06	-4.49339e+07	-541837	-766244	-5.47731e+07	5.78676e+06	-3.34776e+07	3.05692e+06	-361086	-2.4995e+07	0	-3.34776e+07	0	-361086	-3.38387e+07	-5.34173e+06	-3.34776e+07	3.22206e+06	-361086	-3.59583e+07	7.95899e+06	-4.83208e+06	3.1269e+06	1.57068e+07	-9.53383e+06	6.17292e+06	1.12115e+07	-6.80483e+06	4.40662e+06	1.61886e+07	-9.82762e+06	6.36101e+06	1.24305e+07	-7.54996e+06	4.88057e+06	-5.16462e+07	-1.88221e+07	-2.94321e+07	-2.95973e+07	4.88057e+06		-3.35293e+06	-6.67151e+06	-4.65694e+06	-6.86221e+06	-5.8126e+07	-3.16665e+07	-3.84956e+07	-4.28206e+07
2054	-8.92299e+06	-4.75172e+07	-571529	-819105	-5.78309e+07	6.10334e+06	-3.54875e+07	2.95131e+06	-392858	-2.68257e+07	0	-3.54875e+07	0	-392858	-3.58803e+07	-5.63691e+06	-3.54875e+07	3.1307e+06	-392858	-3.83865e+07	8.46911e+06	-5.13043e+06	3.33867e+06	1.66349e+07	-1.00776e+07	6.55732e+06	1.19116e+07	-7.21212e+06	4.69949e+06	1.725e+07	-1.0453e+07	6.797e+06	1.32524e+07	-8.02839e+06	5.224e+06	-5.44922e+07	-2.02683e+07	-3.11808e+07	-3.15895e+07	5.224e+06		-3.54785e+06	-7.02813e+06	-4.92494e+06	-7.26718e+06	-6.13787e+07	-3.38538e+07	-4.08053e+07	-4.56537e+07
2055	-9.32297e+06	-5.01856e+07	-601334	-872146	-6.0982e+07	6.44448e+06	-3.75716e+07	3.15953e+06	-424728	-2.83923e+07	0	-3.75716e+07	0	-424728	-3.79963e+07	-5.66915e+06	-3.75716e+07	3.34627e+06	-424728	-4.03192e+07	9.00619e+06	-5.44438e+06	3.56182e+06	1.71904e+07	-1.03866e+07	6.80375e+06	1.26387e+07	-7.63484e+06	5.00387e+06	1.786e+07	-1.0794e+07	7.06598e+06	1.41012e+07	-8.52203e+06	5.57916e+06	-5.74202e+07	-2.15886e+07	-3.29925e+07	-3.32532e+07	5.57916e+06		-3.75323e+06	-7.25309e+06	-5.20369e+06	-7.5126e+06	-6.47352e+07	-3.56454e+07	-4.32e+07	-4.78318e+07
2056	-9.73151e+06	-5.29392e+07	-631255	-925373	-6.42274e+07	6.74486e+06	-3.97303e+07	3.34627e+06	-456699	-3.00958e+07	0	-3.97303e+07	0	-456699	-4.0187e+07	-5.95632e+06	-3.97303e+07	3.54734e+06	-456699	-4.25959e+07	9.57025e+06	-5.77388e+06	3.79637e+06	1.82782e+07	-1.10253e+07	7.25297e+06	1.33927e+07	-8.07293e+06	5.31981e+06	1.89751e+07	-1.14471e+07	7.52799e+06	1.49769e+07	-9.03084e+06	5.94605e+06	-6.0431e+07	-2.28429e+07	-3.48671e+07	-3.50679e+07	5.94605e+06		-3.9691e+06	-7.66914e+06	-5.49322e+06	-7.93945e+06	-6.81965e+07	-3.7765e+07	-4.56802e+07	-5.05354e+07
2057	-1.01491e+07	-5.40218e+07	-1.86369e+06	-2.17482e+06	-6.82094e+07	7.04272e+06	-4.13695e+07	3.2349e+06	-488776	-3.15807e+07	0	-4.13695e+07	0	-488776	-4.18583e+07	-6.25553e+06	-4.13695e+07	3.4434e+06	-488776	-4.46704e+07	1.01613e+07	-6.1189e+06	4.04236e+06	1.93568e+07	-1.16577e+07	7.69907e+06	1.41737e+07	-8.52638e+06	5.64734e+06	2.01081e+07	-1.2111e+07	7.99714e+06	1.58795e+07	-9.55482e+06	6.3247e+06	-6.41671e+07	-2.38816e+07	-3.62109e+07	-3.66733e+07	6.3247e+06		-4.1955e+06	-8.08359e+06	-5.79357e+06	-8.37449e+06	-7.24049e+07	-3.96643e+07	-4.76519e+07	-5.30449e+07
2058	-9.42738e+06	-5.5016e+07	-3.09172e+06	-3.41997e+06	-7.09551e+07	7.09688e+06	-4.30809e+07	3.12328e+06	-520962	-3.33817e+07	0	-4.30809e+07	0	-520962	-4.36019e+07	-6.28449e+06	-4.30809e+07	3.33231e+06	-520962	-4.65541e+07	6.92483e+06	-4.081e+06	2.84383e+06	2.00024e+07	-1.20174e+07	7.98499e+06	1.49817e+07	-8.99516e+06	5.9865e+06	2.07809e+07	-1.24852e+07	8.2957e+06	1.68091e+07	-1.0094e+07	6.71512e+06	-6.81112e+07	-2.53968e+07	-3.76154e+07	-3.82584e+07	6.71512e+06		-3.05505e+06	-8.34503e+06	-6.1048e+06	-8.64685e+06	-7.40101e+07	-4.17268e+07	-4.97067e+07	-5.52009e+07
2059	-8.55866e+06	-5.59356e+07	-4.30548e+06	-4.65099e+06	-7.34507e+07	7.10638e+06	-4.48623e+07	3.31734e+06	-553261	-3.49918e+07	0	-4.48623e+07	0	-553261	-4.54156e+07	-6.27393e+06	-4.48623e+07	3.52692e+06	-553261	-4.81626e+07	3.71619e+06	-2.06757e+06	1.64862e+06	2.06749e+07	-1.2392e+07	8.28297e+06	1.58165e+07	-9.47922e+06	6.33729e+06	2.14534e+07	-1.28574e+07	8.59601e+06	1.77656e+07	-1.06482e+07	7.11734e+06	-7.18021e+07	-2.67089e+07	-3.90783e+07	-3.95666e+07	7.11734e+06		-1.91925e+06	-8.61714e+06	-6.42694e+06	-8.92016e+06	-7.537e+07	-4.3609e+07	-5.18425e+07	-5.70827e+07
2060	-7.56143e+06	-5.67921e+07	-5.50765e+06	-5.87058e+06	-7.57317e+07	7.08903e+06	-4.67107e+07	3.20354e+06	-585677	-3.70038e+07	0	-4.67107e+07	0	-585677	-4.72964e+07	-6.52529e+06	-4.67107e+07	3.42065e+06	-585677	-5.04011e+07	535285	-98308.8	436976	2.18616e+07	-1.30873e+07	8.77429e+06	1.66783e+07	-9.97856e+06	6.69975e+06	2.264e+07	-1.35505e+07	9.08948e+06	1.8749e+07	-1.12176e+07	7.53136e+06	-7.52947e+07	-2.82296e+07	-4.05967e+07	-4.13116e+07	7.53136e+06		-788154	-9.07404e+06	-6.76004e+06	-9.37826e+06	-7.65199e+07	-4.60779e+07	-5.40565e+07	-5.97793e+07
2061	-6.45183e+06	-5.75946e+07	-6.70035e+06	-7.08083e+06	-7.78276e+07	7.04749e+06	-4.86231e+07	3.08888e+06	-618212	-3.91049e+07	0	-4.86231e+07	0	-618212	-4.92413e+07	-6.51883e+06	-4.86231e+07	3.30661e+06	-618212	-5.24535e+07	-2.61795e+06	1.83219e+06	-785759	2.25791e+07	-1.34898e+07	9.08921e+06	1.7567e+07	-1.04931e+07	7.0739e+06	2.33847e+07	-1.39681e+07	9.41654e+06	1.97593e+07	-1.18021e+07	7.9572e+06	-7.86134e+07	-3.00157e+07	-4.21674e+07	-4.3037e+07	7.9572e+06		338204	-9.36511e+06	-7.10412e+06	-9.68029e+06	-7.74894e+07	-4.847e+07	-5.63454e+07	-6.21338e+07
2062	-5.24409e+06	-5.83509e+07	-7.88518e+06	-8.28334e+06	-7.97635e+07	6.98405e+06	-5.05959e+07	3.28511e+06	-650872	-4.09776e+07	0	-5.05959e+07	0	-650872	-5.12467e+07	-6.47542e+06	-5.05959e+07	3.50348e+06	-650872	-5.42187e+07	-5.74358e+06	3.72817e+06	-2.01541e+06	2.33235e+07	-1.39066e+07	9.41689e+06	1.84827e+07	-1.1023e+07	7.45975e+06	2.41291e+07	-1.43832e+07	9.74589e+06	2.07965e+07	-1.24016e+07	8.39487e+06	-8.17789e+07	-3.15607e+07	-4.3787e+07	-4.44728e+07	8.39487e+06		1.45978e+06	-9.66695e+06	-7.45925e+06	-9.98338e+06	-7.83037e+07	-5.06445e+07	-5.8706e+07	-6.42021e+07
2063	-3.95629e+06	-5.9067e+07	-9.06342e+06	-9.47938e+06	-8.15661e+07	7.16738e+06	-5.262e+07	3.43122e+06	-683658	-4.27051e+07	0	-5.262e+07	0	-683658	-5.33037e+07	-6.70014e+06	-5.262e+07	3.68414e+06	-683658	-5.63197e+07	-8.84164e+06	5.59284e+06	-3.2488e+06	2.4591e+07	-1.46494e+07	9.94153e+06	1.94253e+07	-1.1568e+07	7.85733e+06	2.53964e+07	-1.51243e+07	1.02722e+07	2.18607e+07	-1.30163e+07	8.84439e+06	-8.48149e+07	-3.27635e+07	-4.54463e+07	-4.60475e+07	8.84439e+06		2.57653e+06	-1.01569e+07	-7.82546e+06	-1.04746e+07	-7.89896e+07	-5.2862e+07	-6.11291e+07	-6.67943e+07
2064	-2.59982e+06	-5.97482e+07	-1.0236e+07	-1.06699e+07	-8.3254e+07	7.43043e+06	-5.46916e+07	3.27758e+06	-716576	-4.47002e+07	0	-5.46916e+07	0	-716576	-5.54082e+07	-6.94035e+06	-5.46916e+07	3.56514e+06	-716576	-5.87834e+07	-1.19122e+07	7.42874e+06	-4.48345e+06	2.57413e+07	-1.53182e+07	1.0423e+07	2.03949e+07	-1.21282e+07	8.26664e+06	2.66798e+07	-1.58745e+07	1.08053e+07	2.29518e+07	-1.3646e+07	9.30576e+06	-8.77375e+07	-3.42771e+07	-4.71415e+07	-4.7978e+07	9.30576e+06		3.68842e+06	-1.06071e+07	-8.20278e+06	-1.09736e+07	-7.95656e+07	-5.53072e+07	-6.36109e+07	-6.9757e+07
2065	-1.18491e+06	-6.03988e+07	-1.14038e+07	-1.18558e+07	-8.48433e+07	7.71767e+06	-5.68066e+07	3.45784e+06	-749628	-4.63807e+07	0	-5.68066e+07	0	-749628	-5.75563e+07	-6.91671e+06	-5.68066e+07	3.75318e+06	-749628	-6.07198e+07	-1.49553e+07	9.23784e+06	-5.71743e+06	2.64407e+07	-1.57027e+07	1.0738e+07	2.13913e+07	-1.27036e+07	8.68772e+06	2.75123e+07	-1.63402e+07	1.11722e+07	2.40698e+07	-1.42908e+07	9.779e+06	-9.05607e+07	-3.56427e+07	-4.88685e+07	-4.95476e+07	9.779e+06		4.7954e+06	-1.08978e+07	-8.59127e+06	-1.13133e+07	-8.00479e+07	-5.72785e+07	-6.61475e+07	-7.20331e+07
2066	279252	-6.10223e+07	-1.25674e+07	-1.30375e+07	-8.63479e+07	7.9639e+06	-5.89611e+07	3.61671e+06	-782816	-4.81633e+07	0	-5.89611e+07	0	-782816	-5.97439e+07	-7.14892e+06	-5.89611e+07	3.92681e+06	-782816	-6.2966e+07	-1.79709e+07	1.10217e+07	-6.94921e+06	2.77507e+07	-1.64659e+07	1.12847e+07	2.24147e+07	-1.32942e+07	9.12057e+06	2.88495e+07	-1.71179e+07	1.17316e+07	2.52147e+07	-1.49506e+07	1.02641e+07	-9.32971e+07	-3.68786e+07	-5.06233e+07	-5.12344e+07	1.02641e+07		5.89744e+06	-1.14079e+07	-8.99096e+06	-1.18349e+07	-8.04505e+07	-5.95712e+07	-6.87349e+07	-7.48009e+07
2067	1.78435e+06	-6.16219e+07	-1.37271e+07	-1.42155e+07	-8.77802e+07	8.2075e+06	-5.99327e+07	3.47061e+06	-2.0926e+06	-5.03472e+07	0	-6.1151e+07	0	-816144	-6.19671e+07	-7.39373e+06	-6.1151e+07	3.79553e+06	-816144	-6.55653e+07	-2.09591e+07	1.27815e+07	-8.17762e+06	2.90513e+07	-1.72234e+07	1.18279e+07	2.34651e+07	-1.38999e+07	9.5652e+06	3.02046e+07	-1.79063e+07	1.22983e+07	2.63866e+07	-1.56254e+07	1.07611e+07	-9.59579e+07	-3.85193e+07	-5.24019e+07	-5.3267e+07	1.07611e+07		6.99448e+06	-1.19167e+07	-9.4019e+06	-1.23649e+07	-8.07858e+07	-6.22639e+07	-7.1369e+07	-7.79303e+07
2068	3.31675e+06	-6.22002e+07	-1.48836e+07	-1.53903e+07	-8.91573e+07	8.3267e+06	-6.07692e+07	3.33128e+06	-3.39774e+06	-5.2509e+07	0	-6.33662e+07	0	-849615	-6.42158e+07	-7.36858e+06	-6.33662e+07	3.6572e+06	-849615	-6.79271e+07	-2.392e+07	1.45183e+07	-9.40171e+06	2.78425e+07	-1.64145e+07	1.14281e+07	2.45423e+07	-1.45207e+07	1.00216e+07	3.10998e+07	-1.84049e+07	1.26949e+07	2.75853e+07	-1.63153e+07	1.127e+07	-9.8559e+07	-4.10809e+07	-5.41942e+07	-5.52322e+07	1.127e+07		8.08649e+06	-1.15301e+07	-9.82413e+06	-1.27327e+07	-8.10708e+07	-6.40391e+07	-7.40399e+07	-8.06598e+07
2069	4.86958e+06	-6.27592e+07	-1.60369e+07	-1.65622e+07	-9.04888e+07	8.42743e+06	-6.14849e+07	3.49771e+06	-4.68772e+06	-5.42475e+07	0	-6.56026e+07	0	-883233	-6.64858e+07	-7.30473e+06	-6.56026e+07	3.82466e+06	-883233	-6.99659e+07	-2.68535e+07	1.62328e+07	-1.06207e+07	2.66883e+07	-1.56423e+07	1.10461e+07	2.56465e+07	-1.51567e+07	1.04898e+07	3.19948e+07	-1.89015e+07	1.30933e+07	2.8811e+07	-1.70202e+07	1.17908e+07	-1.01109e+08	-4.32014e+07	-5.5996e+07	-5.68726e+07	1.17908e+07		9.17342e+06	-1.1161e+07	-1.02577e+07	-1.31017e+07	-8.13153e+07	-6.54085e+07	-7.67435e+07	-8.30676e+07
2070	6.43665e+06	-6.33011e+07	-1.71874e+07	-1.77314e+07	-9.17832e+07	8.67402e+06	-6.20917e+07	3.35637e+06	-5.96543e+06	-5.60267e+07	0	-6.78565e+07	0	-917000	-6.87735e+07	-7.50351e+06	-6.78565e+07	3.69134e+06	-917000	-7.25856e+07	-2.97597e+07	1.79257e+07	-1.18341e+07	2.6048e+07	-1.52061e+07	1.08419e+07	2.67776e+07	-1.58078e+07	1.09699e+07	3.34034e+07	-1.97189e+07	1.36845e+07	3.00636e+07	-1.77402e+07	1.23235e+07	-1.03617e+08	-4.51848e+07	-5.78036e+07	-5.89011e+07	1.23235e+07		1.02552e+07	-1.09739e+07	-1.07026e+07	-1.36559e+07	-8.1528e+07	-6.70006e+07	-7.94761e+07	-8.62415e+07
2071	8.01238e+06	-6.38273e+07	-1.83353e+07	-1.88981e+07	-9.30483e+07	8.92631e+06	-6.25995e+07	3.21425e+06	-7.23308e+06	-5.7692e+07	0	-7.0124e+07	0	-950918	-7.10749e+07	-7.44486e+06	-7.0124e+07	3.55034e+06	-950918	-7.49694e+07	-3.26386e+07	1.95974e+07	-1.30413e+07	2.49392e+07	-1.44895e+07	1.04497e+07	2.79357e+07	-1.6474e+07	1.14617e+07	3.43705e+07	-2.02608e+07	1.41098e+07	3.13432e+07	-1.84751e+07	1.28681e+07	-1.0609e+08	-4.72423e+07	-5.96132e+07	-6.08597e+07	1.28681e+07		1.13319e+07	-1.06181e+07	-1.1159e+07	-1.40543e+07	-8.17164e+07	-6.83101e+07	-8.22338e+07	-8.90237e+07
2072	9.59172e+06	-6.43393e+07	-1.80022e+07	-2.00625e+07	-9.28123e+07	9.18323e+06	-6.30168e+07	3.38151e+06	-8.4924e+06	-5.89445e+07	0	-7.1034e+07	0	-2.43825e+06	-7.34723e+07	-7.35019e+06	-7.24016e+07	3.74569e+06	-984991	-7.6991e+07	-3.54903e+07	2.12484e+07	-1.42419e+07	2.38575e+07	-1.37973e+07	1.00602e+07	2.91206e+07	-1.71552e+07	1.19654e+07	3.53374e+07	-2.08001e+07	1.45373e+07	3.26497e+07	-1.9225e+07	1.34246e+07	-1.07054e+08	-4.88842e+07	-6.15069e+07	-6.24537e+07	1.34246e+07		1.24034e+07	-1.02703e+07	-1.16267e+07	-1.44542e+07	-8.04089e+07	-6.92147e+07	-8.5099e+07	-9.14452e+07
2073	9.78128e+06	-6.49443e+07	-1.76656e+07	-2.12166e+07	-9.40452e+07	9.17256e+06	-6.33512e+07	3.23363e+06	-9.74109e+06	-6.06861e+07	0	-7.17797e+07	0	-3.91882e+06	-7.56985e+07	-7.53878e+06	-7.46784e+07	3.63278e+06	-1.01883e+06	-7.96032e+07	-3.5982e+07	2.14176e+07	-1.45644e+07	2.31929e+07	-1.33683e+07	9.82461e+06	2.79592e+07	-1.63667e+07	1.15925e+07	3.68268e+07	-2.1657e+07	1.51698e+07	3.39423e+07	-1.99569e+07	1.39854e+07	-1.0861e+08	-5.08615e+07	-6.4106e+07	-6.44334e+07	1.39854e+07		1.26268e+07	-1.00646e+07	-1.12505e+07	-1.50341e+07	-8.14184e+07	-7.07507e+07	-8.6949e+07	-9.46374e+07
2074	9.69716e+06	-6.55256e+07	-1.73446e+07	-2.23682e+07	-9.55413e+07	9.20646e+06	-6.36091e+07	3.1044e+06	-1.09833e+07	-6.22816e+07	0	-7.23776e+07	0	-5.3816e+06	-7.77592e+07	-7.47155e+06	-7.69511e+07	3.51861e+06	-1.05282e+06	-8.19569e+07	-3.64467e+07	2.15722e+07	-1.48746e+07	2.20508e+07	-1.26482e+07	9.40257e+06	2.68249e+07	-1.5599e+07	1.12259e+07	3.78657e+07	-2.22321e+07	1.56336e+07	3.52619e+07	-2.07036e+07	1.45584e+07	-1.10416e+08	-5.28791e+07	-6.65333e+07	-6.63233e+07	1.45584e+07		1.28412e+07	-9.68731e+06	-1.08824e+07	-1.5455e+07	-8.27e+07	-7.1969e+07	-8.86416e+07	-9.74119e+07
2075	9.3764e+06	-6.60638e+07	-1.72267e+07	-2.2978e+07	-9.68921e+07	9.23573e+06	-6.37967e+07	3.19956e+06	-1.16305e+07	-6.29919e+07	0	-7.28415e+07	0	-6.15871e+06	-7.90002e+07	-7.38754e+06	-7.92165e+07	3.62195e+06	-1.08696e+06	-8.40691e+07	-3.68845e+07	2.15977e+07	-1.52868e+07	2.10143e+07	-1.2296e+07	8.7183e+06	2.57177e+07	-1.51825e+07	1.05352e+07	3.89316e+07	-2.25138e+07	1.64178e+07	3.66085e+07	-2.10773e+07	1.55312e+07	-1.12179e+08	-5.42736e+07	-6.8465e+07	-6.76513e+07	1.55312e+07		1.29201e+07	-9.64413e+06	-1.08406e+07	-1.55797e+07	-8.3972e+07	-7.2636e+07	-8.98408e+07	-9.96488e+07
2076	8.98121e+06	-6.65862e+07	-1.69913e+07	-2.41379e+07	-9.87342e+07	9.20049e+06	-6.39191e+07	3.06667e+06	-1.28622e+07	-6.45141e+07	0	-7.31833e+07	0	-7.59497e+06	-8.07783e+07	-7.56528e+06	-8.14716e+07	3.50423e+06	-1.12126e+06	-8.6654e+07	-3.7594e+07	2.19303e+07	-1.56636e+07	2.05096e+07	-1.19831e+07	8.52641e+06	2.46378e+07	-1.44776e+07	1.01602e+07	4.05018e+07	-2.34167e+07	1.70851e+07	3.79819e+07	-2.18538e+07	1.61281e+07	-1.14398e+08	-5.59877e+07	-7.06181e+07	-6.95689e+07	1.61281e+07		1.32232e+07	-9.49178e+06	-1.04888e+07	-1.61934e+07	-8.55109e+07	-7.40059e+07	-9.12671e+07	-1.02847e+08
2077	8.39982e+06	-6.6937e+07	-1.67416e+07	-2.51271e+07	-1.00406e+08	9.1433e+06	-6.39813e+07	2.93565e+06	-1.39311e+07	-6.58335e+07	0	-7.34133e+07	0	-8.84342e+06	-8.22567e+07	-7.48324e+06	-8.22243e+07	3.37749e+06	-2.56137e+06	-8.88915e+07	-3.82765e+07	2.22075e+07	-1.6069e+07	1.95183e+07	-1.14385e+07	8.07982e+06	2.3585e+07	-1.38719e+07	9.7131e+06	4.16126e+07	-2.39557e+07	1.76569e+07	3.93823e+07	-2.25492e+07	1.68331e+07	-1.16475e+08	-5.77537e+07	-7.25436e+07	-7.12346e+07	1.68331e+07		1.34708e+07	-9.2326e+06	-1.02174e+07	-1.65686e+07	-8.69351e+07	-7.50661e+07	-9.24741e+07	-1.0546e+08
2078	7.79632e+06	-6.72733e+07	-1.65212e+07	-2.62829e+07	-1.02281e+08	9.16379e+06	-6.40632e+07	3.11478e+06	-1.51233e+07	-6.6908e+07	0	-7.36157e+07	0	-1.02302e+07	-8.38459e+07	-7.36958e+06	-8.28642e+07	3.55803e+06	-4.158e+06	-9.08338e+07	-3.8932e+07	2.25196e+07	-1.64124e+07	1.85506e+07	-1.08419e+07	7.70871e+06	2.25593e+07	-1.32192e+07	9.3401e+06	4.01515e+07	-2.29657e+07	1.71858e+07	4.08096e+07	-2.33555e+07	1.74541e+07	-1.18693e+08	-5.91993e+07	-7.45058e+07	-7.3648e+07	1.74541e+07		1.37564e+07	-8.91261e+06	-9.88211e+06	-1.61017e+07	-8.85247e+07	-7.58206e+07	-9.3728e+07	-1.06936e+08
2079	7.18409e+06	-6.75963e+07	-1.63064e+07	-2.74367e+07	-1.04155e+08	9.17257e+06	-6.4105e+07	2.97056e+06	-1.63117e+07	-6.82737e+07	0	-7.37349e+07	0	-1.16095e+07	-8.53445e+07	-7.52513e+06	-8.33462e+07	3.41527e+06	-5.735e+06	-9.31911e+07	-3.95605e+07	2.28193e+07	-1.67412e+07	1.82513e+07	-1.06657e+07	7.58565e+06	2.16824e+07	-1.26658e+07	9.01651e+06	3.93318e+07	-2.23816e+07	1.69502e+07	4.22639e+07	-2.41766e+07	1.80872e+07	-1.20897e+08	-6.0688e+07	-7.6328e+07	-7.62408e+07	1.80872e+07		1.40333e+07	-8.8304e+06	-9.59864e+06	-1.58623e+07	-9.0122e+07	-7.71041e+07	-9.49431e+07	-1.09053e+08
2080	6.57502e+06	-6.79072e+07	-1.60963e+07	-2.85886e+07	-1.06017e+08	9.33285e+06	-6.41092e+07	2.82518e+06	-1.74967e+07	-6.94479e+07	0	-7.37767e+07	0	-1.29825e+07	-8.67592e+07	-7.40129e+06	-8.36847e+07	3.27833e+06	-7.29597e+06	-9.51036e+07	-4.0162e+07	2.31054e+07	-1.70566e+07	1.74594e+07	-1.01843e+07	7.27508e+06	2.08325e+07	-1.21346e+07	8.69799e+06	3.80195e+07	-2.15085e+07	1.65111e+07	4.3745e+07	-2.50125e+07	1.87325e+07	-1.23074e+08	-6.21728e+07	-7.80612e+07	-7.85925e+07	1.87325e+07		1.43014e+07	-8.57155e+06	-9.32367e+06	-1.54455e+07	-9.17157e+07	-7.80194e+07	-9.60829e+07	-1.10549e+08
2081	5.9797e+06	-6.82071e+07	-1.58903e+07	-2.97387e+07	-1.07856e+08	9.50358e+06	-6.40782e+07	3.0055e+06	-1.86784e+07	-7.02475e+07	0	-7.37466e+07	0	-1.43497e+07	-8.80964e+07	-7.27677e+06	-8.38921e+07	3.4602e+06	-8.84367e+06	-9.65523e+07	-4.07366e+07	2.33775e+07	-1.7359e+07	1.66946e+07	-9.71918e+06	6.97541e+06	2.00098e+07	-1.16237e+07	8.38609e+06	3.67617e+07	-2.06814e+07	1.60803e+07	4.52531e+07	-2.58632e+07	1.939e+07	-1.25215e+08	-6.32721e+07	-7.97103e+07	-8.0472e+07	1.939e+07		1.45606e+07	-8.32131e+06	-9.05724e+06	-1.50464e+07	-9.32957e+07	-7.85688e+07	-9.71536e+07	-1.11599e+08
2082	5.40762e+06	-6.85774e+07	-1.56878e+07	-3.0887e+07	-1.09744e+08	9.68305e+06	-6.40146e+07	2.86235e+06	-1.9857e+07	-7.13262e+07	0	-7.365e+07	0	-1.57118e+07	-8.93618e+07	-7.42277e+06	-8.39795e+07	3.31866e+06	-1.03803e+07	-9.84639e+07	-4.12842e+07	2.36353e+07	-1.76489e+07	1.64765e+07	-9.59704e+06	6.87944e+06	1.92142e+07	-1.11328e+07	8.0814e+06	3.60233e+07	-2.01905e+07	1.58329e+07	4.67881e+07	-2.67285e+07	2.00596e+07	-1.27393e+08	-6.44468e+07	-8.12804e+07	-8.2631e+07	2.00596e+07		1.48109e+07	-8.26561e+06	-8.79937e+06	-1.48314e+07	-9.49336e+07	-7.95918e+07	-9.81612e+07	-1.13295e+08
2083	4.79006e+06	-6.89401e+07	-1.54884e+07	-3.20336e+07	-1.11672e+08	9.62023e+06	-6.3921e+07	2.69102e+06	-2.10326e+07	-7.26424e+07	0	-7.34919e+07	0	-1.70692e+07	-9.05612e+07	-7.28967e+06	-8.39568e+07	3.18284e+06	-1.19074e+07	-9.99711e+07	-4.18048e+07	2.38783e+07	-1.79264e+07	1.57658e+07	-9.16872e+06	6.59706e+06	1.84456e+07	-1.06613e+07	7.78436e+06	3.47925e+07	-1.94015e+07	1.5391e+07	4.835e+07	-2.76087e+07	2.07414e+07	-1.29599e+08	-6.60453e+07	-8.27768e+07	-8.45801e+07	2.07414e+07		1.50523e+07	-8.03338e+06	-8.5501e+06	-1.44392e+07	-9.66198e+07	-8.06758e+07	-9.91113e+07	-1.1441e+08
2084	4.13268e+06	-6.92958e+07	-1.5292e+07	-3.31786e+07	-1.13634e+08	9.60623e+06	-6.38e+07	2.84531e+06	-2.22054e+07	-7.35539e+07	0	-7.32773e+07	0	-1.84224e+07	-9.16997e+07	-7.15908e+06	-8.38331e+07	3.37273e+06	-1.34265e+07	-1.01046e+08	-4.22984e+07	2.41065e+07	-1.81919e+07	1.49764e+07	-8.69049e+06	6.28589e+06	1.77041e+07	-1.02088e+07	7.49533e+06	3.3616e+07	-1.86522e+07	1.49638e+07	4.99389e+07	-2.85035e+07	2.14354e+07	-1.31826e+08	-6.7268e+07	-8.42044e+07	-8.60821e+07	2.14354e+07		1.52848e+07	-7.77204e+06	-8.30947e+06	-1.40648e+07	-9.83489e+07	-8.13259e+07	-1.00009e+08	-1.15111e+08
2085	3.44058e+06	-6.96447e+07	-1.50703e+07	-3.43765e+07	-1.15651e+08	9.59135e+06	-6.36541e+07	2.68617e+06	-2.34425e+07	-7.48192e+07	0	-7.30109e+07	0	-1.98515e+07	-9.28624e+07	-7.31679e+06	-8.36168e+07	3.22136e+06	-1.50305e+07	-1.02743e+08	-4.27651e+07	2.43255e+07	-1.84396e+07	1.47337e+07	-8.54148e+06	6.19218e+06	1.69897e+07	-9.74192e+06	7.24778e+06	3.29862e+07	-1.82166e+07	1.47696e+07	5.15547e+07	-2.94616e+07	2.20931e+07	-1.34091e+08	-6.8627e+07	-8.56146e+07	-8.79731e+07	2.20931e+07		1.54356e+07	-7.70485e+06	-8.1037e+06	-1.38889e+07	-1.00215e+08	-8.2524e+07	-1.00966e+08	-1.16632e+08
2086	2.71838e+06	-6.99873e+07	-1.4851e+07	-3.55723e+07	-1.17692e+08	9.51532e+06	-6.3486e+07	2.52579e+06	-2.46764e+07	-7.61213e+07	0	-7.26973e+07	0	-2.12762e+07	-9.39735e+07	-7.18201e+06	-8.33156e+07	3.07579e+06	-1.66275e+07	-1.04049e+08	-4.32048e+07	2.45282e+07	-1.86766e+07	1.40769e+07	-8.11962e+06	5.95723e+06	1.63023e+07	-9.2948e+06	7.00753e+06	3.18367e+07	-1.74418e+07	1.43949e+07	5.31974e+07	-3.0435e+07	2.27624e+07	-1.36369e+08	-7.01641e+07	-8.69659e+07	-8.96544e+07	2.27624e+07		1.55785e+07	-7.51519e+06	-7.90569e+06	-1.35591e+07	-1.02114e+08	-8.36365e+07	-1.01879e+08	-1.17608e+08
2087	1.97021e+06	-7.03203e+07	-1.46339e+07	-3.67659e+07	-1.1975e+08	9.4204e+06	-6.32937e+07	2.71144e+06	-2.59072e+07	-7.70691e+07	0	-7.23364e+07	0	-2.26966e+07	-9.5033e+07	-7.0502e+06	-8.29323e+07	3.27628e+06	-1.82181e+07	-1.04924e+08	-4.36175e+07	2.47145e+07	-1.8903e+07	1.34471e+07	-7.71527e+06	5.73182e+06	1.5642e+07	-8.86723e+06	6.77477e+06	3.07415e+07	-1.6706e+07	1.40355e+07	5.4867e+07	-3.14236e+07	2.34434e+07	-1.38653e+08	-7.13373e+07	-8.82583e+07	-9.08888e+07	2.34434e+07		1.57136e+07	-7.33331e+06	-7.71545e+06	-1.3245e+07	-1.04036e+08	-8.44024e+07	-1.02748e+08	-1.18169e+08
2088	1.20336e+06	-7.06475e+07	-1.44189e+07	-3.79575e+07	-1.2182e+08	9.40595e+06	-6.30036e+07	2.87704e+06	-2.71701e+07	-7.78907e+07	0	-7.19403e+07	0	-2.4113e+07	-9.60533e+07	-7.20804e+06	-8.24817e+07	3.4699e+06	-1.98027e+07	-1.06023e+08	-4.40033e+07	2.48844e+07	-1.91188e+07	1.33639e+07	-7.67509e+06	5.68881e+06	1.50087e+07	-8.45903e+06	6.54969e+06	3.01929e+07	-1.63378e+07	1.38551e+07	5.65636e+07	-3.24275e+07	2.4136e+07	-1.40939e+08	-7.22019e+07	-8.95036e+07	-9.21674e+07	2.4136e+07		1.58409e+07	-7.3128e+06	-7.533e+06	-1.30922e+07	-1.0598e+08	-8.52035e+07	-1.03586e+08	-1.19115e+08
2089	524992	-7.09692e+07	-1.4206e+07	-3.9147e+07	-1.23797e+08	9.46021e+06	-6.26899e+07	2.69578e+06	-2.843e+07	-7.89639e+07	0	-7.15134e+07	0	-2.55254e+07	-9.70389e+07	-7.37269e+06	-8.19706e+07	3.31669e+06	-2.13818e+07	-1.07408e+08	-4.43621e+07	2.5038e+07	-1.93241e+07	1.3093e+07	-7.51073e+06	5.58227e+06	1.44025e+07	-8.07002e+06	6.33245e+06	2.96442e+07	-1.59726e+07	1.36716e+07	5.8287e+07	-3.34467e+07	2.48403e+07	-1.43121e+08	-7.33816e+07	-9.07064e+07	-9.37369e+07	2.48403e+07		1.59603e+07	-7.23677e+06	-7.35834e+06	-1.29391e+07	-1.07837e+08	-8.62007e+07	-1.04397e+08	-1.20348e+08
2090	-79106	-7.12858e+07	-1.39316e+07	-4.03346e+07	-1.25631e+08	9.69123e+06	-6.23567e+07	2.87802e+06	-2.96869e+07	-7.94744e+07	0	-7.10599e+07	0	-2.69341e+07	-9.7994e+07	-7.25735e+06	-8.14053e+07	3.51388e+06	-2.29557e+07	-1.08105e+08	-4.46939e+07	2.51752e+07	-1.95187e+07	1.23296e+07	-7.01817e+06	5.31144e+06	1.38233e+07	-7.70009e+06	6.12317e+06	2.86029e+07	-1.52812e+07	1.33217e+07	6.00374e+07	-3.44811e+07	2.55563e+07	-1.4515e+08	-7.4163e+07	-9.18709e+07	-9.47828e+07	2.55563e+07		1.60718e+07	-7.01506e+06	-7.19147e+06	-1.26403e+07	-1.09559e+08	-8.64895e+07	-1.05185e+08	-1.20745e+08
2091	-751352	-7.15974e+07	-1.36592e+07	-4.15204e+07	-1.27528e+08	9.89514e+06	-6.20075e+07	3.06105e+06	-3.09411e+07	-7.99924e+07	0	-7.05835e+07	0	-2.83391e+07	-9.89226e+07	-7.44199e+06	-8.07917e+07	3.70491e+06	-2.45247e+07	-1.09054e+08	-4.47513e+07	2.51321e+07	-1.96192e+07	1.21912e+07	-6.94068e+06	5.25053e+06	1.32711e+07	-7.34908e+06	5.92198e+06	2.81355e+07	-1.49717e+07	1.31638e+07	6.18147e+07	-3.55307e+07	2.6284e+07	-1.47148e+08	-7.47419e+07	-9.30007e+07	-9.58897e+07	2.6284e+07		1.61023e+07	-6.97788e+06	-7.03241e+06	-1.25108e+07	-1.11426e+08	-8.69703e+07	-1.05955e+08	-1.21564e+08
2092	-1.36332e+06	-7.18825e+07	-1.46669e+07	-4.27317e+07	-1.30644e+08	1.01094e+07	-6.16452e+07	2.89773e+06	-3.21925e+07	-8.08306e+07	0	-7.00878e+07	0	-2.97405e+07	-9.98283e+07	-7.63044e+06	-8.01353e+07	3.54965e+06	-2.6089e+07	-1.10305e+08	-4.47818e+07	2.50734e+07	-1.97084e+07	1.20798e+07	-6.88313e+06	5.19668e+06	1.27459e+07	-7.01691e+06	5.729e+06	2.76679e+07	-1.46651e+07	1.30028e+07	6.3619e+07	-3.65956e+07	2.70234e+07	-1.50353e+08	-7.56339e+07	-9.40993e+07	-9.73023e+07	2.70234e+07		1.61248e+07	-6.94863e+06	-6.88116e+06	-1.2381e+07	-1.1452e+08	-8.77792e+07	-1.06709e+08	-1.22686e+08
2093	-911179	-7.21622e+07	-1.56707e+07	-4.39411e+07	-1.32685e+08	1.00828e+07	-6.12761e+07	2.74109e+06	-3.34412e+07	-8.18934e+07	0	-6.94957e+07	0	-3.11736e+07	-1.00669e+08	-7.53541e+06	-7.94447e+07	3.40113e+06	-2.76488e+07	-1.11228e+08	-4.67562e+07	2.6306e+07	-2.04502e+07	1.14759e+07	-6.49768e+06	4.97825e+06	1.22478e+07	-6.70345e+06	5.54431e+06	2.67078e+07	-1.4032e+07	1.26758e+07	6.54501e+07	-3.76757e+07	2.77745e+07	-1.53135e+08	-7.69152e+07	-9.5125e+07	-9.8552e+07	2.77745e+07		1.67221e+07	-6.77374e+06	-6.73774e+06	-1.21055e+07	-1.15963e+08	-8.86672e+07	-1.07407e+08	-1.23333e+08
2094	-387757	-7.2437e+07	-1.6661e+07	-4.51485e+07	-1.34634e+08	1.00117e+07	-6.09022e+07	2.93113e+06	-3.46873e+07	-8.26467e+07	0	-6.88818e+07	0	-3.26032e+07	-1.01485e+08	-7.4392e+06	-7.87247e+07	3.59236e+06	-2.92043e+07	-1.11776e+08	-4.87035e+07	2.75181e+07	-2.11854e+07	1.09263e+07	-6.14829e+06	4.77804e+06	1.16404e+07	-6.3182e+06	5.32221e+06	2.5802e+07	-1.34364e+07	1.23657e+07	6.73082e+07	-3.8771e+07	2.85373e+07	-1.5582e+08	-7.78687e+07	-9.61628e+07	-9.94102e+07	2.85373e+07		1.73119e+07	-6.61471e+06	-6.56187e+06	-1.18458e+07	-1.17322e+08	-8.92614e+07	-1.08047e+08	-1.23622e+08
2095	188367	-7.27071e+07	-1.76404e+07	-4.6354e+07	-1.36513e+08	9.9155e+06	-6.05253e+07	2.77773e+06	-3.59309e+07	-8.3763e+07	0	-6.82502e+07	0	-3.40296e+07	-1.0228e+08	-7.61138e+06	-7.79796e+07	3.44022e+06	-3.07555e+07	-1.12906e+08	-5.06238e+07	2.86998e+07	-2.19241e+07	1.09232e+07	-6.16372e+06	4.75944e+06	1.10601e+07	-5.95187e+06	5.10821e+06	2.54155e+07	-1.3189e+07	1.22265e+07	6.91932e+07	-3.98814e+07	2.93118e+07	-1.58437e+08	-7.90035e+07	-9.71715e+07	-1.0068e+08	2.93118e+07		1.78944e+07	-6.61707e+06	-6.3938e+06	-1.17393e+07	-1.18619e+08	-9.038e+07	-1.08674e+08	-1.24646e+08
2096	800959	-7.29729e+07	-1.8611e+07	-4.75577e+07	-1.38341e+08	9.79678e+06	-6.01512e+07	2.62349e+06	-3.71721e+07	-8.4903e+07	0	-6.76045e+07	0	-3.54527e+07	-1.03057e+08	-7.50259e+06	-7.72132e+07	3.29427e+06	-3.23027e+07	-1.13724e+08	-5.25171e+07	2.98534e+07	-2.26637e+07	1.04276e+07	-5.85362e+06	4.57395e+06	1.05068e+07	-5.60507e+06	4.90168e+06	2.45366e+07	-1.26174e+07	1.19191e+07	7.11052e+07	-4.10071e+07	3.0098e+07	-1.61004e+08	-8.03291e+07	-9.81555e+07	-1.01805e+08	3.0098e+07		1.84694e+07	-6.47383e+06	-6.23353e+06	-1.14871e+07	-1.19871e+08	-9.13768e+07	-1.09291e+08	-1.25211e+08
2097	1.43567e+06	-7.32344e+07	-1.95743e+07	-4.87597e+07	-1.40133e+08	9.65863e+06	-5.97734e+07	2.81552e+06	-3.84108e+07	-8.57101e+07	0	-6.69479e+07	0	-3.68726e+07	-1.03821e+08	-7.39462e+06	-7.64294e+07	3.48766e+06	-3.3846e+07	-1.14182e+08	-5.43833e+07	3.09812e+07	-2.34022e+07	9.95898e+06	-5.56049e+06	4.39848e+06	9.98045e+06	-5.27754e+06	4.70291e+06	2.37119e+07	-1.20825e+07	1.16295e+07	7.3044e+07	-4.2148e+07	3.0896e+07	-1.63535e+08	-8.13116e+07	-9.91176e+07	-1.02553e+08	3.0896e+07		1.9037e+07	-6.33842e+06	-6.08108e+06	-1.12506e+07	-1.21096e+08	-9.20485e+07	-1.09902e+08	-1.25433e+08
2098	2.15695e+06	-7.34921e+07	-2.05315e+07	-4.99601e+07	-1.41827e+08	9.60058e+06	-5.93977e+07	2.98079e+06	-3.96472e+07	-8.64636e+07	0	-6.62883e+07	0	-3.82895e+07	-1.04578e+08	-7.55757e+06	-7.5553e+07	3.68146e+06	-3.54206e+07	-1.1485e+08	-5.62225e+07	3.20846e+07	-2.4138e+07	1.00368e+07	-5.63142e+06	4.40536e+06	9.48115e+06	-4.96903e+06	4.51211e+06	2.34064e+07	-1.18948e+07	1.15116e+07	7.50098e+07	-4.33041e+07	3.17057e+07	-1.65965e+08	-8.20582e+07	-1.00066e+08	-1.03338e+08	3.17057e+07		1.95972e+07	-6.36442e+06	-5.93644e+06	-1.11675e+07	-1.2223e+08	-9.2828e+07	-1.10514e+08	-1.26017e+08
2099	2.95534e+06	-7.3746e+07	-2.14837e+07	-5.1159e+07	-1.43433e+08	9.62684e+06	-5.90247e+07	2.7994e+06	-4.08813e+07	-8.74798e+07	0	-6.56281e+07	0	-3.97034e+07	-1.05332e+08	-7.73976e+06	-7.46585e+07	3.53563e+06	-3.69914e+07	-1.15854e+08	-5.80347e+07	3.31649e+07	-2.48698e+07	1.00359e+07	-5.65038e+06	4.38549e+06	9.00885e+06	-4.67937e+06	4.32948e+06	2.29918e+07	-1.16361e+07	1.13557e+07	7.70025e+07	-4.44754e+07	3.25271e+07	-1.68303e+08	-8.30943e+07	-1.01002e+08	-1.04498e+08	3.25271e+07		2.01499e+07	-6.36717e+06	-5.79964e+06	-1.10519e+07	-1.23284e+08	-9.3847e+07	-1.11131e+08	-1.26906e+08
2100	3.8223e+06	-7.39964e+07	-2.24317e+07	-5.23564e+07	-1.44962e+08	9.83283e+06	-5.86549e+07	2.98159e+06	-4.21133e+07	-8.79537e+07	0	-6.4969e+07	0	-4.11144e+07	-1.06083e+08	-7.6573e+06	-7.37503e+07	3.72628e+06	-3.85585e+07	-1.1624e+08	-5.98199e+07	3.42231e+07	-2.55968e+07	9.54257e+06	-5.34062e+06	4.20195e+06	8.56355e+06	-4.40838e+06	4.15517e+06	2.2112e+07	-1.10681e+07	1.10438e+07	7.90221e+07	-4.56619e+07	3.33602e+07	-1.70559e+08	-8.37518e+07	-1.01928e+08	-1.05196e+08	3.33602e+07		2.06952e+07	-6.22432e+06	-5.67067e+06	-1.07986e+07	-1.24267e+08	-9.41781e+07	-1.11754e+08	-1.27038e+08
2101	4.75013e+06	-7.42433e+07	-2.33758e+07	-5.35525e+07	-1.46421e+08	1.00145e+07	-5.82886e+07	3.16469e+06	-4.33431e+07	-8.84525e+07	0	-6.43171e+07	0	-4.25226e+07	-1.0684e+08	-7.84237e+06	-7.28322e+07	3.91791e+06	-4.0122e+07	-1.16879e+08	-6.1578e+07	3.52599e+07	-2.63181e+07	9.67407e+06	-5.44468e+06	4.22939e+06	8.14525e+06	-4.15592e+06	3.98933e+06	2.17513e+07	-1.08455e+07	1.09058e+07	8.10686e+07	-4.68636e+07	3.42051e+07	-1.7274e+08	-8.42231e+07	-1.0285e+08	-1.05973e+08	3.42051e+07		2.12331e+07	-6.26607e+06	-5.54955e+06	-1.06986e+07	-1.25188e+08	-9.47185e+07	-1.12389e+08	-1.27577e+08
2102	5.73189e+06	-7.4487e+07	-2.43167e+07	-5.47472e+07	-1.47819e+08	1.02101e+07	-5.91409e+07	3.00157e+06	-4.32147e+07	-8.91439e+07	0	-6.36659e+07	0	-4.3928e+07	-1.07594e+08	-8.04384e+06	-7.19073e+07	3.77036e+06	-4.1682e+07	-1.17863e+08	-6.33091e+07	3.6276e+07	-2.70331e+07	9.83255e+06	-5.56767e+06	4.26488e+06	7.75395e+06	-3.92186e+06	3.83208e+06	2.14177e+07	-1.06433e+07	1.07744e+07	8.31421e+07	-4.80804e+07	3.50617e+07	-1.74852e+08	-8.4879e+07	-1.03762e+08	-1.07088e+08	3.50617e+07		2.17635e+07	-6.31583e+06	-5.43628e+06	-1.06065e+07	-1.26056e+08	-9.54597e+07	-1.1303e+08	-1.28469e+08
2103	6.75771e+06	-7.47275e+07	-2.52547e+07	-5.59406e+07	-1.49165e+08	1.01667e+07	-6.01602e+07	2.84509e+06	-4.30901e+07	-9.02385e+07	0	-6.3022e+07	0	-4.53307e+07	-1.08353e+08	-7.97819e+06	-7.09846e+07	3.61554e+06	-4.32387e+07	-1.18586e+08	-6.50132e+07	3.72719e+07	-2.77413e+07	1.15454e+07	-6.71796e+06	4.82742e+06	7.38963e+06	-3.70609e+06	3.68355e+06	2.06189e+07	-1.01324e+07	1.04865e+07	8.52425e+07	-4.93125e+07	3.593e+07	-1.76906e+08	-8.54111e+07	-1.04669e+08	-1.08099e+08	3.593e+07		2.22864e+07	-6.8253e+06	-5.33087e+06	-1.03767e+07	-1.26879e+08	-9.70638e+07	-1.13684e+08	-1.28963e+08
2104	7.82187e+06	-7.4965e+07	-2.61901e+07	-5.71329e+07	-1.50466e+08	1.00812e+07	-6.13286e+07	3.03539e+06	-4.298e+07	-9.1192e+07	0	-6.2386e+07	0	-4.67309e+07	-1.09117e+08	-7.87749e+06	-7.00664e+07	3.80755e+06	-4.47921e+07	-1.18928e+08	-6.66903e+07	3.8248e+07	-2.84423e+07	1.33124e+07	-7.89748e+06	5.41488e+06	7.05231e+06	-3.50849e+06	3.54382e+06	1.98199e+07	-9.62233e+06	1.01976e+07	8.73698e+07	-5.05598e+07	3.68101e+07	-1.78908e+08	-8.57771e+07	-1.05573e+08	-1.08731e+08	3.68101e+07		2.28019e+07	-7.3513e+06	-5.23333e+06	-1.01466e+07	-1.27664e+08	-9.85433e+07	-1.1435e+08	-1.29075e+08
2105	8.91921e+06	-7.51996e+07	-2.71231e+07	-5.83241e+07	-1.51728e+08	9.97207e+06	-6.26307e+07	2.88232e+06	-4.28815e+07	-9.26579e+07	0	-6.17587e+07	0	-4.81285e+07	-1.09887e+08	-8.05783e+06	-6.91546e+07	3.66325e+06	-4.63422e+07	-1.19891e+08	-6.83404e+07	3.92046e+07	-2.91358e+07	1.56255e+07	-9.42466e+06	6.20088e+06	6.74197e+06	-3.32898e+06	3.41299e+06	1.95673e+07	-9.47801e+06	1.00893e+07	8.9524e+07	-5.18222e+07	3.77018e+07	-1.80863e+08	-8.6457e+07	-1.06474e+08	-1.09802e+08	3.77018e+07		2.33098e+07	-8.03937e+06	-5.14367e+06	-1.00778e+07	-1.28418e+08	-1.00697e+08	-1.15031e+08	-1.29969e+08
2106	1.00451e+07	-7.54313e+07	-2.80538e+07	-5.95142e+07	-1.52954e+08	9.84166e+06	-6.40532e+07	2.72835e+06	-4.27925e+07	-9.42757e+07	0	-6.11404e+07	0	-4.95236e+07	-1.10664e+08	-7.97364e+06	-6.82554e+07	3.51111e+06	-4.78892e+07	-1.20607e+08	-6.99635e+07	4.0142e+07	-2.98214e+07	1.74463e+07	-1.0612e+07	6.83427e+06	6.45862e+06	-3.16746e+06	3.29116e+06	1.88496e+07	-9.02733e+06	9.82223e+06	9.17052e+07	-5.30998e+07	3.86053e+07	-1.82776e+08	-8.74414e+07	-1.07373e+08	-1.10785e+08	3.86053e+07		2.38103e+07	-8.58252e+06	-5.06189e+06	-9.87144e+06	-1.29144e+08	-1.02858e+08	-1.15726e+08	-1.30479e+08
2107	1.11953e+07	-7.56603e+07	-2.77051e+07	-6.07033e+07	-1.52873e+08	9.69196e+06	-6.55787e+07	2.92071e+06	-4.27113e+07	-9.56773e+07	0	-6.18954e+07	0	-4.93725e+07	-1.11268e+08	-7.85653e+06	-6.73621e+07	3.70537e+06	-4.94332e+07	-1.20946e+08	-7.15595e+07	4.10605e+07	-3.0499e+07	1.9294e+07	-1.18043e+07	7.48969e+06	6.20225e+06	-3.02385e+06	3.1784e+06	1.81316e+07	-8.57645e+06	9.55516e+06	9.39133e+07	-5.43927e+07	3.95206e+07	-1.83373e+08	-8.81876e+07	-1.08089e+08	-1.11391e+08	3.95206e+07		2.43033e+07	-9.13418e+06	-4.98801e+06	-9.66476e+06	-1.2857e+08	-1.04811e+08	-1.16256e+08	-1.30611e+08
2108	1.12137e+07	-7.58867e+07	-2.736e+07	-6.18915e+07	-1.53924e+08	9.62316e+06	-6.71964e+07	3.08635e+06	-4.26366e+07	-9.71234e+07	0	-6.28275e+07	0	-4.92257e+07	-1.12053e+08	-8.02224e+06	-6.6483e+07	3.90707e+06	-5.09742e+07	-1.21572e+08	-7.12009e+07	4.06828e+07	-3.05181e+07	2.16878e+07	-1.33503e+07	8.33747e+06	8.30282e+06	-4.44203e+06	3.8608e+06	1.79599e+07	-8.49046e+06	9.46948e+06	9.61483e+07	-5.57007e+07	4.04475e+07	-1.84443e+08	-8.8786e+07	-1.08192e+08	-1.12103e+08	4.04475e+07		2.42186e+07	-9.84793e+06	-5.61111e+06	-9.61941e+06	-1.29706e+08	-1.06971e+08	-1.17664e+08	-1.31192e+08
2109	1.09849e+07	-7.61105e+07	-2.70284e+07	-6.30788e+07	-1.55233e+08	9.63945e+06	-6.88967e+07	2.90531e+06	-4.25674e+07	-9.89193e+07	0	-6.39172e+07	0	-4.90952e+07	-1.13012e+08	-8.22466e+06	-6.56186e+07	3.76212e+06	-5.25123e+07	-1.22593e+08	-7.08153e+07	4.0292e+07	-3.05232e+07	2.40028e+07	-1.48355e+07	9.16731e+06	1.04303e+07	-5.87128e+06	4.55901e+06	1.78425e+07	-8.44153e+06	9.40096e+06	9.84102e+07	-5.7024e+07	4.13862e+07	-1.85756e+08	-8.9752e+07	-1.08453e+08	-1.13192e+08	4.13862e+07		2.41259e+07	-1.05391e+07	-6.2428e+06	-9.59005e+06	-1.31107e+08	-1.09458e+08	-1.19255e+08	-1.32183e+08
2110	1.05412e+07	-7.63318e+07	-2.67714e+07	-6.42652e+07	-1.56827e+08	9.83654e+06	-7.06706e+07	3.08784e+06	-4.25031e+07	-1.00249e+08	0	-6.5148e+07	0	-4.8978e+07	-1.14126e+08	-8.14571e+06	-6.47696e+07	3.95365e+06	-5.40476e+07	-1.23009e+08	-7.04027e+07	3.98983e+07	-3.05044e+07	2.58255e+07	-1.59841e+07	9.84144e+06	1.25846e+07	-7.29956e+06	5.28507e+06	1.72328e+07	-8.06429e+06	9.16846e+06	1.00699e+08	-5.83624e+07	4.23366e+07	-1.87332e+08	-9.04079e+07	-1.08841e+08	-1.13841e+08	4.23366e+07		2.4025e+07	-1.10854e+07	-6.88309e+06	-9.41504e+06	-1.32802e+08	-1.11335e+08	-1.21009e+08	-1.32424e+08
2111	1.00411e+07	-7.65506e+07	-2.65233e+07	-6.54509e+07	-1.58484e+08	1.00104e+07	-7.25101e+07	3.27134e+06	-4.2443e+07	-1.01671e+08	0	-6.65052e+07	0	-4.88716e+07	-1.15377e+08	-8.33218e+06	-6.39366e+07	4.1532e+06	-5.38802e+07	-1.21996e+08	-7.02111e+07	3.96632e+07	-3.05479e+07	2.82728e+07	-1.75394e+07	1.07334e+07	1.47659e+07	-8.73008e+06	6.03579e+06	1.7142e+07	-8.0306e+06	9.11142e+06	1.03015e+08	-5.97161e+07	4.32987e+07	-1.89032e+08	-9.0938e+07	-1.09341e+08	-1.12884e+08	4.32987e+07		2.39894e+07	-1.18169e+07	-7.53199e+06	-9.39336e+06	-1.34494e+08	-1.13488e+08	-1.22909e+08	-1.31389e+08
2112	9.36971e+06	-7.67671e+07	-2.62826e+07	-6.66359e+07	-1.60316e+08	1.01992e+07	-7.31631e+07	3.10856e+06	-4.37752e+07	-1.03631e+08	0	-6.79707e+07	0	-4.8774e+07	-1.16745e+08	-8.55245e+06	-6.46057e+07	4.00654e+06	-5.37174e+07	-1.22869e+08	-6.99925e+07	3.94199e+07	-3.05726e+07	3.07469e+07	-1.91074e+07	1.16396e+07	1.6974e+07	-1.01653e+07	6.80871e+06	1.96708e+07	-9.73418e+06	9.93667e+06	1.05357e+08	-6.1085e+07	4.42725e+07	-1.90888e+08	-9.1991e+07	-1.09936e+08	-1.12932e+08	4.42725e+07		2.39457e+07	-1.25571e+07	-8.18951e+06	-1.01464e+07	-1.3637e+08	-1.16188e+08	-1.24934e+08	-1.33016e+08
2113	8.68873e+06	-7.69813e+07	-2.60482e+07	-6.78202e+07	-1.62161e+08	1.02499e+07	-7.36993e+07	2.95243e+06	-4.51049e+07	-1.05602e+08	0	-6.95332e+07	0	-4.86838e+07	-1.18217e+08	-8.48891e+06	-6.54605e+07	3.8526e+06	-5.35727e+07	-1.23669e+08	-6.97469e+07	3.91656e+07	-3.05813e+07	3.06334e+07	-1.8952e+07	1.16814e+07	1.9209e+07	-1.16071e+07	7.60194e+06	2.17073e+07	-1.11023e+07	1.0605e+07	1.07727e+08	-6.24691e+07	4.5258e+07	-1.92742e+08	-9.39204e+07	-1.10615e+08	-1.13064e+08	4.5258e+07		2.3894e+07	-1.25327e+07	-8.85565e+06	-1.07547e+07	-1.38267e+08	-1.18135e+08	-1.27073e+08	-1.34424e+08
2114	8.00955e+06	-7.71932e+07	-2.58191e+07	-6.90039e+07	-1.64007e+08	1.02852e+07	-7.41307e+07	3.14308e+06	-4.6421e+07	-1.07123e+08	0	-7.11823e+07	0	-4.86e+07	-1.19782e+08	-8.38791e+06	-6.64801e+07	4.04551e+06	-5.34423e+07	-1.24265e+08	-6.94745e+07	3.88997e+07	-3.05748e+07	3.05742e+07	-1.88323e+07	1.17418e+07	2.14709e+07	-1.30569e+07	8.41404e+06	2.37435e+07	-1.24495e+07	1.1294e+07	1.10124e+08	-6.38684e+07	4.62552e+07	-1.94581e+08	-9.53816e+07	-1.11368e+08	-1.12971e+08	4.62552e+07		2.38342e+07	-1.25244e+07	-9.53042e+06	-1.13634e+07	-1.40172e+08	-1.19648e+08	-1.29313e+08	-1.35628e+08
2115	7.34245e+06	-7.7403e+07	-2.55945e+07	-7.0187e+07	-1.65842e+08	1.0469e+07	-7.44672e+07	2.99035e+06	-4.77262e+07	-1.08734e+08	0	-7.29087e+07	0	-4.85215e+07	-1.2143e+08	-8.56868e+06	-6.76467e+07	3.9021e+06	-5.33238e+07	-1.25637e+08	-6.91751e+07	3.86214e+07	-3.05537e+07	3.1061e+07	-1.90883e+07	1.19727e+07	2.37597e+07	-1.45159e+07	9.24388e+06	2.63257e+07	-1.41445e+07	1.21813e+07	1.12547e+08	-6.5283e+07	4.7264e+07	-1.96396e+08	-9.67614e+07	-1.12186e+08	-1.13456e+08	4.7264e+07		2.37664e+07	-1.26775e+07	-1.02138e+07	-1.21343e+07	-1.42076e+08	-1.21412e+08	-1.31644e+08	-1.37771e+08
2116	6.6967e+06	-7.76106e+07	-2.53739e+07	-7.13697e+07	-1.67657e+08	1.06607e+07	-7.47171e+07	2.83671e+06	-4.90227e+07	-1.10242e+08	0	-7.47038e+07	0	-4.84479e+07	-1.23152e+08	-8.48263e+06	-6.89451e+07	3.75085e+06	-5.32148e+07	-1.26892e+08	-6.88488e+07	3.83303e+07	-3.05185e+07	3.10557e+07	-1.9027e+07	1.20287e+07	2.60754e+07	-1.59848e+07	1.00906e+07	2.84429e+07	-1.5518e+07	1.29249e+07	1.14997e+08	-6.67128e+07	4.82846e+07	-1.98176e+08	-9.82136e+07	-1.13061e+08	-1.13967e+08	4.82846e+07		2.36905e+07	-1.26852e+07	-1.09059e+07	-1.27684e+07	-1.43967e+08	-1.22928e+08	-1.34058e+08	-1.3966e+08
2117	6.0807e+06	-7.78161e+07	-2.5157e+07	-7.25519e+07	-1.69444e+08	1.08591e+07	-7.48873e+07	3.0294e+06	-5.03121e+07	-1.11311e+08	0	-7.65536e+07	0	-4.83785e+07	-1.24932e+08	-8.36172e+06	-7.03564e+07	3.946e+06	-5.3114e+07	-1.27886e+08	-6.84955e+07	3.8026e+07	-3.04695e+07	3.10773e+07	-1.89888e+07	1.20885e+07	2.8418e+07	-1.74645e+07	1.09535e+07	3.05597e+07	-1.68785e+07	1.36812e+07	1.17475e+08	-6.81579e+07	4.93168e+07	-1.99914e+08	-9.92223e+07	-1.13979e+08	-1.14205e+08	4.93168e+07		2.36066e+07	-1.27008e+07	-1.16066e+07	-1.3403e+07	-1.45838e+08	-1.24012e+08	-1.36539e+08	-1.41289e+08
2118	5.42479e+06	-7.80195e+07	-2.49433e+07	-7.37337e+07	-1.71272e+08	1.08133e+07	-7.49841e+07	3.19538e+06	-5.15956e+07	-1.12571e+08	0	-7.84508e+07	0	-4.8313e+07	-1.26764e+08	-8.52387e+06	-7.18686e+07	4.14859e+06	-5.30199e+07	-1.29264e+08	-6.81153e+07	3.77083e+07	-3.04071e+07	3.16451e+07	-1.93193e+07	1.23258e+07	3.07875e+07	-1.89553e+07	1.18322e+07	3.32227e+07	-1.85927e+07	1.46299e+07	1.19979e+08	-6.96182e+07	5.03607e+07	-2.01679e+08	-1.00245e+08	-1.14932e+08	-1.14634e+08	5.03607e+07		2.35145e+07	-1.28781e+07	-1.2316e+07	-1.41998e+07	-1.47757e+08	-1.25449e+08	-1.3908e+08	-1.43464e+08
2119	4.73387e+06	-7.8221e+07	-2.47326e+07	-7.49152e+07	-1.73135e+08	1.08147e+07	-7.50131e+07	3.01466e+06	-5.28743e+07	-1.14058e+08	0	-8.03886e+07	0	-4.8251e+07	-1.2864e+08	-8.7222e+06	-7.34709e+07	4.00452e+06	-5.29318e+07	-1.3112e+08	-6.77082e+07	3.7377e+07	-3.03313e+07	3.21342e+07	-1.96014e+07	1.25328e+07	3.31839e+07	-2.04578e+07	1.27261e+07	3.59397e+07	-2.03342e+07	1.56055e+07	1.2251e+08	-7.10938e+07	5.14162e+07	-2.03466e+08	-1.01525e+08	-1.15913e+08	-1.15515e+08	5.14162e+07		2.34144e+07	-1.30322e+07	-1.3034e+07	-1.50134e+07	-1.4972e+08	-1.2709e+08	-1.41674e+08	-1.46134e+08
2120	4.01242e+06	-7.84204e+07	-2.45247e+07	-7.60964e+07	-1.75029e+08	1.08137e+07	-7.49791e+07	3.19751e+06	-5.41489e+07	-1.15117e+08	0	-8.23607e+07	0	-4.81925e+07	-1.30553e+08	-8.63759e+06	-7.51535e+07	4.19694e+06	-5.28489e+07	-1.32443e+08	-6.72742e+07	3.70319e+07	-3.02423e+07	3.2131e+07	-1.95573e+07	1.25738e+07	3.56072e+07	-2.19721e+07	1.36351e+07	3.81645e+07	-2.17386e+07	1.64259e+07	1.25068e+08	-7.25847e+07	5.24834e+07	-2.05271e+08	-1.02543e+08	-1.16918e+08	-1.16017e+08	5.24834e+07		2.33062e+07	-1.30408e+07	-1.37607e+07	-1.56823e+07	-1.51723e+08	-1.28158e+08	-1.44314e+08	-1.48125e+08
2121	3.2645e+06	-7.8618e+07	-2.43085e+07	-7.63891e+07	-1.76051e+08	1.07502e+07	-7.48867e+07	3.28834e+06	-5.45842e+07	-1.15432e+08	0	-8.43615e+07	0	-4.79584e+07	-1.3232e+08	-8.81898e+06	-7.69075e+07	4.2898e+06	-5.25832e+07	-1.3402e+08	-6.68133e+07	3.6695e+07	-3.01183e+07	3.27525e+07	-1.96823e+07	1.30702e+07	3.80574e+07	-2.26871e+07	1.53703e+07	4.09081e+07	-2.25729e+07	1.83352e+07	1.27653e+08	-7.30801e+07	5.4573e+07	-2.06169e+08	-1.02362e+08	-1.1695e+08	-1.15685e+08	5.4573e+07		2.33062e+07	-1.30408e+07	-1.37607e+07	-1.56823e+07	-1.52745e+08	-1.28473e+08	-1.46081e+08	-1.49702e+08
[truncated: 105 more rows]

## Sheet: Marg_imps_all_decadal
	Decadal impact (UNITS - Mg CO2e)
[truncated: 93 more rows]
[truncated: 6 more columns]

## Sheet: Marg_imps_all_m3
	Decadal impact (UNITS - Mg CO2e)
[truncated: 93 more rows]
[truncated: 5 more columns]

## Sheet: Tropical_Aff(50yrs)
		Growth rate	Reference	Realising the benefit of research in eucalypt plantation management November 2009Southern Forests: a Journal of Forest Science 70(2):119-129 DOI: 10.2989/SOUTH.FOR.2008.70.2.7.535	https://www.researchgate.net/publication/261656729_Realising_the_benefit_of_research_in_eucalypt_plantation_management https://www.tandfonline.com/doi/epdf/10.2989/SOUTH.FOR.2008.70.2.7.535?needAccess=true
[truncated: 137 more rows]
[truncated: 8 more columns]

[truncated: 39 more sheets: Marg_imps_all_avg, Marg_imp_hi_bor (Aff50yrs), Marg_imp_hi_trop (Aff50yrs), Marg_imp_hi_bor (Aff35yrs), Marg_imp_hi_trop (Aff35yrs), Marg_imp_lo_bor (Aff50yrs), Marg_imp_lo_trop (Aff50yrs), Marg_imp_lo_bor (Aff35yrs), Marg_imp_lo_trop (Aff35yrs), IRW_supply_demand_graphs (2), IRW_supply_demand_graphs, IRW_supply_demand (Aff50yrs), IRW_supply_demand (Aff35yrs), Results_graphs (Aff50yrs), Results_graphs (Aff35yrs), Forest&HWP_impact_(Aff50yrs), Forest&HWP_impact_(Aff35yrs), Forest_C_impact_all, HWP_impact_all, 50_35 …]
