# Supplementary material for: Can temperate forests deliver both future wood demand and climate-change mitigation?
Source: Research Square preprint supplement (doi:10.21203/rs.3.rs-3681726/v1), 2023-12-14
Supplement: Supplementary file 3 [file d7dc6be9cbc36f3a5391144d.xlsx]

## Sheet: Description of worksheets
	Worksheet name	Description
1	LCIA (Yr1 & Yr1-100)	Life cycle impact assessment (LCIA) results for a 1 ha planting taking place in year 1 and also the results of tree planting taking place from 2020 to 2050 (over 100 year period).
2	Yr2… Yr31	These sheets are all duplicated from worksheet 'LCIA (Yr1 & Yr1-100)' and represent the GHG mitigation for each subsequent year of planting. These sheets feed back into worksheet 'LCIA (Yr1 & Yr1-100)' to calculate the cumulative impact of tree planting from 2020 to 2050.
3	LCIA (preliminary)	This worksheet contains preliminary LCIA results - calculating year 100 GWP impact (applying current (2019) marginal energy assumptions and process emissions data throughout the 100 year period). These LCIA results were performed prior to accounting for the dynamic effects of marginal energy and decarbonisation (i.e. before 'LCIA (Yr1 & Yr1-100)' was produced) in order to gauge the relative contr…
4	Material flow	This worksheet presents the wood flow through all the life cycle stages. It is calculated in percentages. These percentages are used in combination with harvest data (in tonnes or m3) to quantify actual flows.
5	Database	This worksheet contains the emissions factors for all ecoinvent unit processes used in the LCIA to calculate GWP impact.
6	CBM-CFS2 data	This worksheet contains the carbon modelling data produced by CBM-CFS2 that is used in the LCA.
7	HWP	This worksheet calculates the retirement of primary products from the HWP carbon pool and the retirement of secondary (recycled) products from the HWP carbon pool (for 1ha of commercial plantation). It also calculates the GHG emissions from wood products that are landfilled at the end of their life.
8	HWP (1ha yr to 2050)	This worksheet is duplicated from 'HWP' and calculates the % composition of products making up the HWP carbon pool after 100 years, for tree planting between 2020 and 2050 by accounting for retirement of primary and secondary products from the HWP carbon pool from each planting year.
9	Energy and FF Displacement	This presents assumptions used in the calculation of avoided emissions from marginal energy substitution.
10	Constrn_ff_displacement	This worksheet calculates the substitution factor for construction materials substituted by carcassing to enable avoided emissions to be calculated.
11	Mulch C storage	This worksheet calculates the carbon storage and degradation of bark chips used for horticultural mulch.
12	Life cycle inventory	This worksheet contains a table summarising the key inputs and outputs of the forestry value chain throughout the life cycle.
Updates
2021-02-15	corrected error on concrete subn (spurious '1' in cell AL31 (year 2030))

## Sheet: LCIA (Yr1 & Yr1-100)
																Summary of emissions discounts to apply (to 2020 assumptions) (see Sx):
																																											30 yrs of Planting graphs:
																	2020-2029		2030-2039		2040-2049		2050-2084		2085-2120
																	Core	FA	Core	FA	Core	FA	Core	FA	Core	FA
																Avoided emissions - Biomass (heat) - marginal supply	none	none	none	none	none	0.25258	0.9	0.039435	0	0
																Avoided emissions - Biomass (electricity) - marginal supply	none	none	0.9127	0.5635	0.8254	0.127	0.5635	0	0.127	0
																Avoided emissions - Incineration (electricity) - marginal supply	none	none	0.9127	0.5635	0.8254	0.127	0.5635	0	0.127	0
																Incineration (heat) - marginal supply	none	none	none	none	none	0	0.9	0.136905	0	0
																C storage - BECCS (biomass electricity)	none	none	0.09	0.45	0.18	0.9	0.45	1	0.9	1
																C storage - BECCS (biomass heat)	none	none	0	0	0	0.405	0	0.81	0.405	0.9
																Avoided emissions - Cement production - CCS application (calcination)	n/a	n/a	n/a	n/a	n/a	n/a	none	0.45568	0.93952	0.3952
																Avoided emissions - Cement production - furnace emissions reduction	n/a	n/a	n/a	n/a	n/a	n/a	0.9784	0.95104	0.95104	0.712
																Emissions - Wood panel (particle board) production (CCS on heat production)	none	none	none	none	none	0.6355	none	0.271	0.6355	0.19
																Emissions - Harvester/forwarder	none	none	none	none	none	0.55	0.87	0.1	0	0
	Annual C stock - total ecosystem (tonnes C) - >75% thin									Natural Forest' C sequestration
		Total Ecosystem(GH model (thinned) average soil v3 Default Simu			Thinned					(Core targets scenario)	'Total Ecosystem(Afforestation (conservation) Default Simulation					Core targets scenario																											Core targets scenario			Annual planting rate:	1	ha/yr
		Forest ecosystem (thinned)	HWP total	Net system C	Mulch/S C storage	HWP primary	HWP secondary				Net ecosystem C	Process emissions	Annual C flux	Net cumulative C sequestration and storage			1st planting (Mg CO2 eq)																							Plantation (Core)				31 yrs of planting (Mg CO2 eq)
	Year	Tonnes C			Tonnes C					Year	Tonnes C	Tonnes C	Mg CO2eq			Year	Terrestrial C storage		HWP C storage		Forestry/ wood processing emissions (total)		Forestry/ primary wood processing emissions	Secondary wood processing emissions	(BE)CCS (total)		(BE)CCS (primary)	(BE)CCS (secondary)	(BE)CCS (tertiary)	FF offset (total)		Primary electricity offset (biomass + incineration)	Secondary electricity offset (biomass + incineration)	Tertiary electricity offset (biomass + incineration)	Heat offset (biomass)	Heat offset (incineration)	Concrete offset (net)		Net - annual flux	Net - cumulative C sequestration	% more net C accumulation compared to conservation		Year	Terrestrial C storage		HWP C storage		Forestry/ wood processing emissions (total)
																	Annual flux	Accumulation	Annual flux	Accumulation	Annual flux	Accumulation			Annual flux	Accumulation				Annual flux	Accumulation						Annual flux	Accumulation						Annual flux	Accumulation	Annual flux	Accumulation	Annual flux	Accumulation
	0	81	0	81	0	0	0			2020	81	1.36461	5.00358	5.00358		2020	0	0	0	0	5.00358	5.00358	5.00358	0	0	0	0	0	0	0	0	0	0	0	0	0	0	0	5.00358	5.00358	0		2020	0	0	0	0	5.00358	5.00358
	1	80.8365	0	80.8365		0	0			2021	80.8429		0.575894	5.57947		2021	0.599623	0.599623	0	0	0	5.00358	0	0	0	0	0	0	0	0	0	0	0	0	0	0	0	0	0.599623	5.6032	0.00425291		2021	0.599623	0.599623	0	0	5.00358	10.0072
	2	80.975	0	80.975		0	0			2022	80.9424		-0.36473	5.21474		2022	-0.507923	0.0917007	0	0	0	5.00358	0	0	0	0	0	0	0	0	0	0	0	0	0	0	0	0	-0.507923	5.09528	-0.0229087		2022	0.0917007	0.691324	0	0	5.00358	15.0107
	3	81.5	0	81.5		0	0			2023	81.3393		-1.45544	3.7593		2023	-1.92493	-1.83323	0	0	0	5.00358	0	0	0	0	0	0	0	0	0	0	0	0	0	0	0	0	-1.92493	3.17035	-0.156665		2023	-1.83323	-1.14191	0	0	5.00358	20.0143
	4	82.4699	0	82.4699		0	0			2024	82.0617		-2.64872	1.11058		2024	-3.55635	-5.38958	0	0	0	5.00358	0	0	0	0	0	0	0	0	0	0	0	0	0	0	0	0	-3.55635	-0.386001	-1.34757		2024	-5.38958	-6.53149	0	0	5.00358	25.0179
	5	83.9295	0	83.9295		0	0			2025	83.1297		-3.91591	-2.80532		2025	-5.35193	-10.7415	0	0	0	5.00358	0	0	0	0	0	0	0	0	0	0	0	0	0	0	0	0	-5.35193	-5.73793	1.04537		2025	-10.7415	-17.273	0	0	5.00358	30.0215
	6	85.9132	0	85.9132		0	0			2026	84.5573		-5.23457	-8.03989		2026	-7.27359	-18.0151	0	0	0	5.00358	0	0	0	0	0	0	0	0	0	0	0	0	0	0	0	0	-7.27359	-13.0115	0.618371		2026	-18.0151	-35.2881	0	0	5.00358	35.0251
	7	88.4465	0	88.4465		0	0			2027	86.3534		-6.58557	-14.6255		2027	-9.28859	-27.3037	0	0	0	5.00358	0	0	0	0	0	0	0	0	0	0	0	0	0	0	0	0	-9.28859	-22.3001	0.524746		2027	-27.3037	-62.5918	0	0	5.00358	40.0286
	8	91.5466	0	91.5466		0	0			2028	88.5221		-7.95205	-22.5775		2028	-11.3672	-38.6709	0	0	0	5.00358	0	0	0	0	0	0	0	0	0	0	0	0	0	0	0	0	-11.3672	-33.6673	0.491189		2028	-38.6709	-101.263	0	0	5.00358	45.0322
	9	95.2236	0	95.2236		0	0			2029	91.0637		-9.31896	-31.8965		2029	-13.4824	-52.1533	0	0	0	5.00358	0	0	0	0	0	0	0	0	0	0	0	0	0	0	0	0	-13.4824	-47.1497	0.478212		2029	-52.1533	-153.416	0	0	5.00358	50.0358
	10	99.4808	0	99.4808		0	0			2030	93.9745		-10.673	-42.5695		2030	-15.6095	-67.7629	0	0	0	5.00358	0	0	0	0	0	0	0	0	0	0	0	0	0	0	0	0	-15.6095	-62.7593	0.47428		2030	-67.7629	-221.179	0	0	5.00358	55.0394
	11	104.315	0	104.315		0	0			2031	97.2478		-12.0023	-54.5718		2031	-17.7267	-85.4896	0	0	0	5.00358	0	0	0	0	0	0	0	0	0	0	0	0	0	0	0	0	-17.7267	-80.486	0.474865		2031	-85.4896	-306.668	0	0	5.00358	60.043
	12	109.719	0	109.719		0	0			2032	100.874		-13.2969	-67.8687		2032	-19.8148	-105.304	0	0	0	5.00358	0	0	0	0	0	0	0	0	0	0	0	0	0	0	0	0	-19.8148	-100.301	0.477865		2032	-105.304	-411.973	0	0	5.00358	65.0465
	13	115.68	0	115.68		0	0			2033	104.842		-14.548	-82.4167		2033	-21.8574	-127.162	0	0	0	5.00358	0	0	0	0	0	0	0	0	0	0	0	0	0	0	0	0	-21.8574	-122.158	0.482202		2033	-127.162	-539.135	0	0	5.00358	70.0501
	14	122.183	0	122.183		0	0			2034	109.137		-15.7483	-98.165		2034	-23.8412	-151.003	0	0	0	5.00358	0	0	0	0	0	0	0	0	0	0	0	0	0	0	0	0	-23.8412	-145.999	0.487285		2034	-151.003	-690.137	0	0	5.00358	75.0537
	15	129.207	0	129.207		0	0			2035	113.744		-16.8918	-115.057		2035	-25.7549	-176.758	0	0	0	5.00358	0	0	0	0	0	0	0	0	0	0	0	0	0	0	0	0	-25.7549	-171.754	0.492778		2035	-176.758	-866.895	0	0	5.00358	80.0573
	16	136.731	0	136.731		0	0			2036	118.646		-17.9733	-133.03		2036	-27.5896	-204.347	0	0	0	5.00358	0	0	0	0	0	0	0	0	0	0	0	0	0	0	0	0	-27.5896	-199.344	0.498488		2036	-204.347	-1071.24	0	0	5.00358	85.0609
	17	144.732	0	144.732		0	0			2037	123.824		-18.9887	-152.019		2037	-29.338	-233.685	0	0	0	5.00358	0	0	0	0	0	0	0	0	0	0	0	0	0	0	0	0	-29.338	-228.682	0.504301		2037	-233.685	-1304.93	0	0	5.00358	90.0644
	18	153.185	0	153.185		0	0			2038	129.261		-19.9347	-171.953		2038	-30.9935	-264.679	0	0	0	5.00358	0	0	0	0	0	0	0	0	0	0	0	0	0	0	0	0	-30.9935	-259.675	0.51015		2038	-264.679	-1569.61	0	0	5.00358	95.068
	19	162.063	0	162.063		0	0			2039	134.936		-20.8082	-192.762		2039	-32.5507	-297.23	0	0	0	5.00358	0	0	0	0	0	0	0	0	0	0	0	0	0	0	0	0	-32.5507	-292.226	0.515997		2039	-297.23	-1866.84	0	0	5.00358	100.072
	20	171.337	0	171.337		0	0			2040	138.961		-14.7598	-207.521		2040	-34.0044	-331.234	0	0	0	5.00358	0	0	0	0	0	0	0	0	0	0	0	0	0	0	0	0	-34.0044	-326.23	0.572032		2040	-331.234	-2198.07	0	0	5.00358	105.075
	21	166.535	6.76672	173.301	0.415937	6.35078	0			2041	143.702		-17.382	-224.903		2041	17.6073	-313.627	-24.8113	-24.8113	8.32153	13.3251	8.32153	0	-3.1732	-3.1732	-2.83669	-0.12753	-0.20898	-5.08575	-5.08575	-5.08575	0	0	0	0	0	0	-7.14141	-333.372	0.482289		2041	-313.627	-2511.7	-24.8113	-24.8113	13.3251	118.4
	22	174.253	6.00167	180.255		5.40511	0.596564			2042	148.506		-17.6139	-242.517		2042	-28.3006	-341.927	2.80517	-22.0061	3.74541e-07	13.3251	0	3.74541e-07	-0.33651	-3.50971		-0.12753	-0.20898	-1.47255	-6.5583	0	-0.219732	-1.25282	0	0	0	0	-27.3045	-360.676	0.487219		2042	-341.927	-2853.62	-22.0061	-46.8174	13.3251	131.725
	23	182.581	5.73256	188.313		4.71306	1.01951			2043	153.352		-17.7693	-260.287		2043	-30.5355	-372.463	0.986722	-21.0194	2.74092e-07	13.3251	0	2.74092e-07	-0.33651	-3.84622		-0.12753	-0.20898	-1.41362	-7.97192	0	-0.160801	-1.25282	0	0	0	0	-31.2989	-391.975	0.505937		2043	-372.463	-3226.09	-21.0194	-67.8368	13.3251	145.05
	24	191.425	5.52023	196.945		4.20096	1.31927			2044	159.692		-23.2471	-283.534		2044	-32.4275	-404.89	0.778555	-20.2408	2.0282e-07	13.3251	0	2.0282e-07	-0.33651	-4.18273		-0.12753	-0.20898	-1.37181	-9.34373	0	-0.118988	-1.25282	0	0	0	0	-33.3572	-425.332	0.500112		2044	-404.89	-3630.98	-20.2408	-88.0777	13.3251	158.376
	25	200.704	5.34825	206.052		3.81671	1.53154			2045	165.832		-22.5139	-306.048		2045	-34.0251	-438.915	0.630603	-19.6102	1.52184e-07	13.3251	0	1.52184e-07	-0.33651	-4.51924		-0.12753	-0.20898	-1.3421	-10.6858	0	-0.0892818	-1.25282	0	0	0	0	-35.0731	-460.406	0.504359		2045	-438.915	-4069.89	-19.6102	-107.688	13.3251	171.701
	26	210.764	5.20501	215.969		3.52345	1.68155			2046	175.455		-35.2823	-341.33		2046	-36.8851	-475.8	0.52522	-19.085	1.16148e-07	13.3251	0	1.16148e-07	-0.33651	-4.85575		-0.12753	-0.20898	-1.32096	-12.0068	0	-0.0681406	-1.25282	0	0	0	0	-38.0174	-498.423	0.460238		2046	-475.8	-4545.69	-19.085	-126.773	13.3251	185.026
	27	220.383	5.0823	225.465		3.2951	1.7872			2047	184.967		-34.8791	-376.209		2047	-35.2691	-511.07	0.449927	-18.6351	9.04419e-08	13.3251	0	9.04419e-08	-0.33651	-5.19226		-0.12753	-0.20898	-1.30588	-13.3127	0	-0.0530594	-1.25282	0	0	0	0	-36.4615	-534.884	0.421774		2047	-511.07	-5056.76	-18.6351	-145.408	13.3251	198.351
	28	230.067	4.97433	235.041		3.11319	1.86114			2048	194.39		-34.5515	-410.761		2048	-35.5086	-546.578	0.395902	-18.2392	7.20458e-08	13.3251	0	7.20458e-08	-0.33651	-5.52877		-0.12753	-0.20898	-1.29509	-14.6078	0	-0.042267	-1.25282	0	0	0	0	-36.7443	-571.629	0.391635		2048	-546.578	-5603.34	-18.2392	-163.647	13.3251	211.676
	29	239.806	4.87699	244.683		2.96466	1.91232			2049	203.739		-34.2804	-445.041		2049	-35.7094	-582.288	0.356909	-17.8823	5.88248e-08	13.3251	0	5.88248e-08	-0.33651	-5.86528		-0.12753	-0.20898	-1.28733	-15.8951	0	-0.0345107	-1.25282	0	0	0	0	-36.9763	-608.605	0.367526		2049	-582.288	-6185.63	-17.8823	-181.529	13.3251	225.001
	30	249.591	4.78739	254.378		2.84026	1.94712			2050	213.027		-34.0532	-479.094		2050	-35.8788	-618.166	0.328537	-17.5537	4.92691e-08	13.3251	0	4.92691e-08	-0.841274	-6.70655		-0.318825	-0.522449	-0.875032	-16.7701	0	-0.0197332	-0.855299	0	0	0	0	-37.2665	-645.872	0.34811		2050	-618.166	-6803.79	-17.5537	-199.083	12.3875	237.389
	31	259.679	4.70348	264.382		2.73343	1.97004			2051	219.105		-22.2888	-501.383		2051	-36.9884	-655.155	0.30767	-17.2461	4.23108e-08	13.3251	0	4.23108e-08	-0.841274	-7.54783		-0.318825	-0.522449	-0.872245	-17.6424	0	-0.0169462	-0.855299	0	0	0	0	-38.3942	-684.266	0.364756		2051	-655.155	-7458.95	-17.2461	-216.329	8.03437	245.423
	32	269.8	4.62381	274.424		2.63952	1.98429			2052	225.133		-22.1014	-523.484		2052	-37.1136	-692.268	0.292104	-16.954	3.71945e-08	13.3251	0	3.71945e-08	-0.841274	-8.3891		-0.318825	-0.522449	-0.870196	-18.5126	0	-0.0148971	-0.855299	0	0	0	0	-38.533	-722.799	0.380745		2052	-692.868	-8151.82	-16.954	-233.283	8.03437	253.457
	33	279.952	4.54737	284.499		2.55523	1.99214			2053	231.118		-21.9445	-545.429		2053	-37.2206	-729.489	0.280281	-16.6737	3.33861e-08	13.3251	0	3.33861e-08	-0.841274	-9.23037		-0.318825	-0.522449	-0.868671	-19.3812	0	-0.0133718	-0.855299	0	0	0	0	-38.6502	-761.449	0.396055		2053	-729.581	-8881.4	-16.6737	-249.957	8.03437	261.492
	34	290.127	4.47343	294.601		2.4782	1.99523			2054	237.067		-21.8117	-567.241		2054	-37.312	-766.801	0.271101	-16.4026	3.05077e-08	13.3251	0	3.05077e-08	-0.841274	-10.0716		-0.318825	-0.522449	-0.867518	-20.2487	0	-0.0122189	-0.855299	0	0	0	0	-38.7497	-800.199	0.410686		2054	-764.968	-9646.37	-16.4026	-266.36	8.03437	269.526
	35	300.325	4.40149	304.726		2.40676	1.99473			2055	242.985		-21.699	-588.94		2055	-37.3905	-804.191	0.263788	-16.1388	2.8292e-08	13.3251	0	2.8292e-08	-0.841274	-10.9129		-0.318825	-0.522449	-0.86663	-21.1154	0	-0.0113315	-0.855299	0	0	0	0	-38.8346	-839.033	0.424651		2055	-798.802	-10445.2	-16.1388	-282.498	8.03437	277.56
	36	310.163	4.33118	314.494		2.33973	1.99146			2056	248.464		-20.0901	-609.03		2056	-36.0712	-840.263	0.257791	-15.881	2.65498e-08	13.3251	0	2.65498e-08	-0.841274	-11.7542		-0.318825	-0.522449	-0.865932	-21.9813	0	-0.0106337	-0.855299	0	0	0	0	-37.5206	-876.554	0.439263		2056	-829.521	-11274.7	-15.881	-298.379	8.03437	285.595
	37	320.013	4.26226	324.276		2.27624	1.98602			2057	253.915		-19.989	-629.019		2057	-36.1194	-876.382	0.252723	-15.6283	2.51471e-08	13.3251	0	2.51471e-08	-0.841274	-12.5955		-0.318825	-0.522449	-0.865371	-22.8467	0	-0.0100719	-0.855299	0	0	0	0	-37.5733	-914.127	0.453259		2057	-858.367	-12133.1	-15.6283	-314.008	8.03437	293.629
	38	329.876	4.19454	334.07		2.21567	1.97887			2058	259.343		-19.9032	-648.922		2058	-36.1622	-912.544	0.24831	-15.38	2.39891e-08	13.3251	0	2.39891e-08	-0.841274	-13.4367		-0.318825	-0.522449	-0.864907	-23.7116	0	-0.00960808	-0.855299	0	0	0	0	-37.62	-951.747	0.466659		2058	-885.24	-13018.3	-15.38	-329.388	8.03437	301.664
	39	339.748	4.1279	343.876		2.15757	1.97032			2059	264.751		-19.8296	-668.752		2059	-36.1997	-948.744	0.244361	-15.1356	2.30087e-08	13.3251	0	2.30087e-08	-0.841274	-14.278		-0.318825	-0.522449	-0.864514	-24.5761	0	-0.00921539	-0.855299	0	0	0	0	-37.6611	-989.408	0.479486		2059	-910.073	-13928.4	-15.1356	-344.523	8.03437	309.698
	40	349.63	4.06224	353.692		2.10163	1.96061			2060	270.142		-19.7665	-688.518		2060	-36.2329	-984.977	0.240738	-14.8949	2.21581e-08	13.3251	0	2.21581e-08	-0.841274	-15.1193		-0.318825	-0.522449	-0.864174	-25.4403	0	-0.00887474	-0.855299	0	0	0	0	-37.6976	-1027.11	0.491763		2060	-932.823	-14861.2	-14.8949	-359.418	8.03437	317.732
	41	358.788	3.99751	362.786		2.04758	1.94993			2061	275.112		-18.2224	-706.74		2061	-33.5798	-1018.56	0.237346	-14.6575	2.14037e-08	13.3251	0	2.14037e-08	-0.841274	-15.9606		-0.318825	-0.522449	-0.863871	-26.3041	0	-0.00857257	-0.855299	0	0	0	0	-35.0476	-1062.15	0.502891		2061	-950.794	-15812	-14.6575	-374.076	8.03437	325.767
	42	367.946	3.93366	371.879		1.99526	1.93839			2062	280.063		-18.1553	-724.896		2062	-33.5776	-1052.13	0.234119	-14.4234	2.07213e-08	13.3251	0	2.07213e-08	-0.841274	-16.8018		-0.318825	-0.522449	-0.863598	-27.1677	0	-0.00829928	-0.855299	0	0	0	0	-35.0484	-1097.2	0.5136		2062	-966.645	-16778.6	-14.4234	-388.499	8.03437	333.801
	43	377.104	3.87066	380.974		1.94453	1.92613			2063	284.999		-18.0982	-742.994		2063	-33.5792	-1085.71	0.231009	-14.1924	2.0094e-08	13.3251	0	2.0094e-08	-0.841274	-17.6431		-0.318825	-0.522449	-0.863347	-28.0311	0	-0.00804801	-0.855299	0	0	0	0	-35.0529	-1132.25	0.523909		2063	-980.409	-17759	-14.1924	-402.691	8.03437	341.835
	44	386.263	3.80848	390.071		1.89527	1.91321			2064	289.924		-18.0569	-761.051		2064	-33.5828	-1119.3	0.227984	-13.9644	1.95094e-08	13.3251	0	1.95094e-08	-0.841274	-18.4844		-0.318825	-0.522449	-0.863113	-28.8942	0	-0.00781386	-0.855299	0	0	0	0	-35.0592	-1167.31	0.533819		2064	-992.134	-18751.2	-13.9644	-416.656	8.03437	349.87
	45	395.423	3.74711	399.17		1.8474	1.89971			2065	294.838		-18.0171	-779.068		2065	-33.5875	-1152.88	0.22502	-13.7394	1.89588e-08	13.3251	0	1.89588e-08	-0.841274	-19.3257		-0.318825	-0.522449	-0.862892	-29.7571	0	-0.00759335	-0.855299	0	0	0	0	-35.0667	-1202.38	0.543358		2065	-1001.88	-19753.1	-13.7394	-430.395	8.03437	357.904
	46	403.812	3.68654	407.499		1.80085	1.88568			2066	299.396		-16.7129	-795.781		2066	-30.7614	-1183.65	0.222103	-13.5173	1.8436e-08	13.3251	0	1.8436e-08	-0.841274	-20.1669		-0.318825	-0.522449	-0.862683	-30.6198	0	-0.00738395	-0.855299	0	0	0	0	-32.2433	-1234.62	0.551462		2066	-1006.89	-20759.9	-13.5173	-443.913	8.03437	365.939
	47	412.194	3.62675	415.82		1.75557	1.87118			2067	303.94		-16.6615	-812.442		2067	-30.732	-1214.38	0.219221	-13.2981	1.79364e-08	13.3251	0	1.79364e-08	-0.841274	-21.0082		-0.318825	-0.522449	-0.862483	-31.4823	0	-0.00718385	-0.855299	0	0	0	0	-32.2165	-1266.84	0.559299		2067	-1010.03	-21770	-13.2981	-457.211	8.03437	373.973
	48	420.569	3.56774	424.137		1.71149	1.85625			2068	308.472		-16.6177	-829.06		2068	-30.7102	-1245.09	0.216367	-13.0817	1.74566e-08	13.3251	0	1.74566e-08	-0.841274	-21.8495		-0.318825	-0.522449	-0.862291	-32.3445	0	-0.00699171	-0.855299	0	0	0	0	-32.1974	-1299.04	0.566881		2068	-1011.4	-22781.4	-13.0817	-470.292	8.03437	382.007
	49	428.94	3.5095	432.45		1.66858	1.84092			2069	312.994		-16.5804	-845.64		2069	-30.6944	-1275.78	0.213536	-12.8682	1.69943e-08	13.3251	0	1.69943e-08	-0.841274	-22.6908		-0.318825	-0.522449	-0.862105	-33.2067	0	-0.00680655	-0.855299	0	0	0	0	-32.1842	-1331.22	0.574218		2069	-1011.1	-23792.5	-12.8682	-483.161	8.03437	390.042
	50	250.406	117.514	367.92	8.22192	107.466	1.82594			2070	317.507		-16.5483	-862.189		2070	654.627	-621.154	-418.017	-430.885	158.643	171.968	158.643	1.69943e-08	-45.4301	-68.1208	-44.5888	-0.318825	-0.522449	-23.1934	-56.4	-22.2718	-0.00680655	-0.855299	0	-0.0594749	-336.622	-336.622	-9.9919	-1341.21	0.555592		2070	-323.925	-24116.4	-430.885	-914.046	166.677	556.719
	51	235.471	107.841	343.312		98.6261	9.21454			2071	321.752		-15.5635	-877.752		2071	54.7601	-566.394	35.4692	-395.416	0.195766	172.164	0	0.195766	-0.841274	-68.9621		-0.318825	-0.522449	-2.21013	-58.6102		-1.29535	-0.855299	0	-0.0594749	0	-336.622	87.3737	-1253.84	0.428467		2071	-235.16	-24351.6	-395.416	-1309.46	166.873	723.592
	52	223.192	104.754	327.947		91.5144	13.2401			2072	325.986		-15.5257	-893.278		2072	45.0223	-521.372	11.316	-384.1	0.138427	172.302	0	0.138427	-0.841274	-69.8034		-0.318825	-0.522449	-1.96728	-60.5775		-1.0525	-0.855299	0	-0.0594749	0	-336.622	53.6681	-1200.17	0.34356		2072	-207.745	-24559.3	-359.288	-1668.75	158.977	882.569
	53	213.194	102.116	315.311		85.7258	16.3903			2073	330.211		-15.4932	-908.771		2073	36.6589	-484.713	9.67397	-374.426	0.097883	172.4	0	0.097883	-0.841274	-70.6446		-0.318825	-0.522449	-1.77953	-62.357		-0.864758	-0.855299	0	-0.0594749	0	-336.622	43.8099	-1156.36	0.272446		2073	-142.786	-24702.1	-352.42	-2021.17	159.075	1041.64
	54	205.188	99.8243	305.012		80.9551	18.8692			2074	334.429		-15.4652	-924.236		2074	29.3588	-455.354	8.40341	-366.022	0.069214	172.469	0	0.069214	-0.841274	-71.4859		-0.318825	-0.522449	-1.63374	-63.9907		-0.718961	-0.855299	0	-0.0594749	0	-336.622	35.3565	-1121.01	0.212899		2074	-82.8915	-24785	-345.003	-2366.17	159.144	1200.79
	55	198.944	97.8011	296.745		76.9713	20.8298			2075	338.64		-15.441	-939.677		2075	22.8921	-432.462	7.41837	-358.604	0.0489419	172.518	0	0.0489419	-0.841274	-72.3272		-0.318825	-0.522449	-1.51998	-65.5107		-0.60521	-0.855299	0	-0.0594749	0	-336.622	27.9982	-1093.01	0.163173		2075	-27.5719	-24812.6	-338.363	-2704.54	159.193	1359.98
	56	194.283	95.9867	290.27		73.5991	22.3876			2076	342.529		-14.2596	-953.937		2076	17.0904	-415.372	6.65266	-351.951	0.0346074	172.553	0	0.0346074	-0.841274	-73.1685		-0.318825	-0.522449	-1.43079	-66.9415		-0.516016	-0.855299	0	-0.0594749	0	-336.622	21.5057	-1071.5	0.123242		2076	23.5436	-24789	-332.341	-3036.88	159.228	1519.21
	57	191.057	94.3353	285.392		70.7051	23.6301			2077	346.407		-14.2193	-968.156		2077	11.8309	-403.541	6.05542	-345.896	0.0244713	172.577	0	0.0244713	-0.841274	-74.0097		-0.318825	-0.522449	-1.36048	-68.302		-0.445704	-0.855299	0	-0.0594749	0	-336.622	15.7091	-1055.79	0.0905192		2077	72.2597	-24716.8	-326.811	-3363.69	159.252	1678.46
	58	189.141	92.8114	281.952		68.1873	24.6241			2078	350.276		-14.1847	-982.341		2078	7.02363	-396.517	5.58754	-340.308	0.017304	172.594	0	0.017304	-0.841274	-74.851		-0.318825	-0.522449	-1.30473	-69.6067		-0.389954	-0.855299	0	-0.0594749	0	-336.622	10.4825	-1045.31	0.0641015		2078	114.552	-24602.2	-321.673	-3685.36	159.269	1837.73
	59	188.431	91.388	279.819		65.9673	25.4208			2079	354.136		-14.1547	-996.496		2079	2.60238	-393.915	5.219	-335.089	0.012236	172.607	0	0.012236	-0.841274	-75.6923		-0.318825	-0.522449	-1.26025	-70.8669		-0.345474	-0.855299	0	-0.0594749	0	-336.622	5.7321	-1039.58	0.0432342		2079	152.663	-24449.5	-316.85	-4002.21	159.282	1997.01
	60	188.835	90.0444	278.88		63.9849	26.0595			2080	358.007		-14.1943	-1010.69		2080	-1.48191	-395.397	4.92676	-330.163	0.0086523	172.615	0	0.0086523	-0.841274	-76.5336		-0.318825	-0.522449	-1.22451	-72.0915		-0.309739	-0.855299	0	-0.0594749	0	-336.622	1.38771	-1038.19	0.0272098		2080	186.891	-24262.6	-312.28	-4314.49	159.29	2156.3
	61	190.272	88.7644	279.036		62.1935	26.5709			2081	361.578		-13.0916	-1023.78		2081	-5.26639	-400.663	4.69314	-325.469	0.00611825	172.621	0	0.00611825	-0.841274	-77.3748		-0.318825	-0.522449	-1.19559	-73.287		-0.280814	-0.855299	0	-0.0594749	0	-336.622	-2.60399	-1040.79	0.0166179		2081	217.503	-24045.1	-307.916	-4622.41	159.296	2315.6
	62	192.666	87.5359	280.202		60.5572	26.9787			2082	365.139		-13.0578	-1036.84		2082	-8.77949	-409.443	4.50457	-320.965	0.00432641	172.626	0	0.00432641	-0.841274	-78.2161		-0.318825	-0.522449	-1.17198	-74.459		-0.257209	-0.855299	0	-0.0594749	0	-336.622	-6.28384	-1047.08	0.0098754		2082	245.712	-23799.4	-303.719	-4926.13	159.301	2474.9
	63	195.951	86.3493	282.3		59.0477	27.3016			2083	368.692		-13.0286	-1049.87		2083	-12.0439	-421.486	4.35064	-316.614	0.00305937	172.629	0	0.00305937	-0.841274	-79.0574		-0.318825	-0.522449	-1.15255	-75.6116		-0.237773	-0.855299	0	-0.0594749	0	-336.622	-9.68404	-1056.76	0.00656712		2083	270.782	-23528.6	-299.66	-5225.79	159.304	2634.2
	64	200.063	85.1975	285.26		57.6432	27.5543			2084	372.239		-13.0033	-1062.87		2084	-15.0777	-436.564	4.22335	-312.391	0.00216344	172.631	0	0.00216344	-0.841274	-79.8987		-0.318825	-0.522449	-1.13639	-76.748		-0.221616	-0.855299	0	-0.0594749	0	-336.622	-12.8299	-1069.59	0.00632363		2084	292.925	-23235.7	-295.717	-5521.5	159.306	2793.51
	65	204.944	84.0748	289.018		56.3264	27.7484			2085	375.779		-12.9809	-1075.85		2085	-17.8959	-454.46	4.11656	-308.274	0.000972256	172.632	0	0.000972256	-1.68255	-81.5812		-0.63765	-1.0449	-0.239654	-76.9876		-0.0468889	-0.192765	0	0	0	-336.622	-15.7006	-1085.29	0.00877524		2085	312.341	-22923.4	-291.872	-5813.38	101.24	2894.75
	66	210.537	82.977	293.514		55.0837	27.8932			2086	378.979		-11.733	-1087.59		2086	-20.5107	-474.971	4.02554	-304.249	0.000687568	172.633	0	0.000687568	-1.68255	-83.2638		-0.63765	-1.0449	-0.237057	-77.2247		-0.0442926	-0.192765	0	0	0	-336.622	-18.4041	-1103.7	0.0148144		2086	329.221	-22594.2	-288.11	-6101.49	101.241	2995.99
	67	216.792	81.9006	298.692		53.9045	27.996			2087	382.167		-11.6891	-1099.27		2087	-22.9322	-497.903	3.94668	-300.302	0.000486259	172.633	0	0.000486259	-1.68255	-84.9463		-0.63765	-1.0449	-0.234829	-77.4595		-0.042064	-0.192765	0	0	0	-336.622	-20.9024	-1124.6	0.0230381		2087	342.36	-22251.8	-284.421	-6385.91	101.241	3097.23
	68	223.656	80.8432	304.499		52.7802	28.0629			2088	385.344		-11.6509	-1110.93		2088	-25.1684	-523.071	3.87718	-296.425	0.00034391	172.633	0	0.00034391	-1.68255	-86.6288		-0.63765	-1.0449	-0.232894	-77.6924		-0.0401291	-0.192765	0	0	0	-336.622	-23.2063	-1147.81	0.0331981		2088	353.311	-21898.5	-280.797	-6666.7	101.241	3198.47
	69	231.081	79.8027	310.884		51.704	28.0988			2089	388.513		-11.6174	-1122.54		2089	-27.2256	-550.297	3.8149	-292.61	0.000243252	172.634	0	0.000243252	-1.68255	-88.3114		-0.63765	-1.0449	-0.231195	-77.9236		-0.0384303	-0.192765	0	0	0	-336.622	-25.3242	-1173.13	0.0450651		2089	362.247	-21536.2	-277.23	-6943.93	101.242	3299.71
	70	239.02	78.7778	317.797		50.6703	28.1075			2090	391.673		-11.5877	-1134.13		2090	-29.1086	-579.405	3.75818	-288.852	0.000172074	172.634	0	0.000172074	-1.68255	-89.9939		-0.63765	-1.0449	-0.229687	-78.1533		-0.036922	-0.192765	0	0	0	-336.622	-27.2625	-1200.39	0.0584256		2090	369.338	-21166.9	-273.716	-7217.65	101.242	3400.95
	71	231.313	89.8941	321.207	4.95963	56.8177	28.1167			2091	394.647		-10.9046	-1145.03		2091	28.2574	-551.148	-40.7597	-329.612	5.89236	178.526	5.89176	0.000600351	-17.6353	-107.629	-15.9528	-0.63765	-1.0449	-0.853094	-79.0064	-0.880131	0.219802	-0.192765	0	0	0	-336.622	-25.0983	-1225.49	0.0702651		2091	433.829	-20733.1	-314.717	-7532.37	107.134	3508.09
	72	237.694	83.5438	321.238		54.793	28.7508			2092	397.611		-10.8671	-1155.9		2092	-23.3968	-574.545	23.2842	-306.327	8.64165e-05	178.526	0	8.64165e-05	-1.68255	-109.312		-0.63765	-1.0449	-0.265133	-79.2715		-0.0723685	-0.192765	0	0	0	-336.622	-2.06018	-1227.55	0.0619854		2092	444.012	-20289.1	-291.67	-7824.04	107.134	3615.22
	73	244.775	82.256	327.031		53.0851	29.1708			2093	400.565		-10.8334	-1166.74		2093	-25.9644	-600.509	4.72222	-301.605	6.11752e-05	178.526	0	6.11752e-05	-1.68255	-110.994		-0.63765	-1.0449	-0.253813	-79.5253		-0.0610481	-0.192765	0	0	0	-336.622	-23.1785	-1250.73	0.0719907		2093	451.625	-19837.4	-287.182	-8111.22	107.134	3722.36
	74	252.449	81.0441	333.493		51.6087	29.4354			2094	403.511		-10.8033	-1177.54		2094	-28.1377	-628.647	4.44339	-297.162	4.3325e-05	178.526	0	4.3325e-05	-1.68255	-112.677		-0.63765	-1.0449	-0.245542	-79.7709		-0.0527767	-0.192765	0	0	0	-336.622	-25.6224	-1276.35	0.0839151		2094	457.066	-19380.4	-282.969	-8394.19	107.134	3829.49
	75	261.038	79.8894	340.928		50.303	29.5864			2095	406.45		-10.776	-1188.31		2095	-31.493	-660.14	4.23386	-292.928	3.07013e-05	178.526	0	3.07013e-05	-1.68255	-114.359		-0.63765	-1.0449	-0.239438	-80.0103		-0.0466735	-0.192765	0	0	0	-336.622	-29.1811	-1305.53	0.0986425		2095	459.156	-18921.2	-278.964	-8673.15	107.134	3936.63
	76	269.304	78.7785	348.082		49.1249	29.6536			2096	408.192		-6.38738	-1194.7		2096	-30.3066	-690.446	4.07344	-288.855	2.17732e-05	178.526	0	2.17732e-05	-1.68255	-116.042		-0.63765	-1.0449	-0.234879	-80.2452		-0.0421142	-0.192765	0	0	0	-336.622	-28.1506	-1333.68	0.116332		2096	462.437	-18458.8	-275.115	-8948.27	107.134	4043.76
	77	277.737	77.7018	355.439		48.0436	29.6582			2097	409.898		-6.2551	-1200.96		2097	-30.9215	-721.368	3.94783	-284.907	1.54585e-05	178.527	0	1.54585e-05	-1.68255	-117.725		-0.63765	-1.0449	-0.231421	-80.4766		-0.0386563	-0.192765	0	0	0	-336.622	-28.8876	-1362.57	0.134571		2097	462.277	-17996.5	-271.389	-9219.66	107.134	4150.89
	78	286.315	76.6527	362.967		47.0369	29.6157			2098	411.573		-6.13887	-1207.1		2098	-31.4525	-752.821	3.84689	-281.06	1.09917e-05	178.527	0	1.09917e-05	-1.68255	-119.407		-0.63765	-1.0449	-0.228751	-80.7054		-0.0359863	-0.192765	0	0	0	-336.622	-29.5169	-1392.09	0.153254		2098	461.557	-17534.9	-267.762	-9487.42	107.134	4258.03
	79	295.019	75.6263	370.645		46.0892	29.5371			2099	413.219		-6.03548	-1213.13		2099	-31.9141	-784.735	3.76347	-277.296	7.83171e-06	178.527	0	7.83171e-06	-1.68255	-121.09		-0.63765	-1.0449	-0.226646	-80.932		-0.0338814	-0.192765	0	0	0	-336.622	-30.0598	-1422.15	0.172295		2099	460.353	-17074.6	-264.215	-9751.63	107.134	4365.16
	80	304.096	74.6192	378.715		45.189	29.4303			2100	414.839		-5.94241	-1219.07		2100	-33.2832	-818.018	3.69248	-273.604	5.59576e-06	178.527	0	5.59576e-06	-1.68255	-122.772		-0.63765	-1.0449	-0.224948	-81.1569		-0.0321837	-0.192765	0	0	0	-336.622	-31.4983	-1453.65	0.192418		2100	457.764	-16616.8	-260.736	-10012.4	107.134	4472.3
	81	313.27	73.6291	386.9		44.328	29.3012			2101	416.17		-4.88069	-1223.95		2101	-33.6402	-851.658	3.63034	-269.974	4.01329e-06	178.527	0	4.01329e-06	-1.68255	-124.455		-0.63765	-1.0449	-0.223546	-81.3805		-0.0307811	-0.192765	0	0	0	-336.622	-31.916	-1485.56	0.21374		2101	-230.504	-16847.3	160.911	-9851.46	6.317	4478.61
	82	322.531	72.6543	395.185		43.5002	29.1541			2102	417.475		-4.78507	-1228.74		2102	-33.9547	-885.613	3.57451	-266.399	2.89294e-06	178.527	0	2.89294e-06	-1.68255	-126.137		-0.63765	-1.0449	-0.222358	-81.6029		-0.0295936	-0.192765	0	0	0	-336.622	-32.2851	-1517.85	0.235288		2102	-319.219	-17166.6	129.017	-9722.44	6.19259	4484.81
	83	331.867	71.6934	403.56		42.7012	28.9922			2103	418.757		-4.69816	-1233.44		2103	-34.2328	-919.846	3.52318	-262.876	2.09939e-06	178.527	0	2.09939e-06	-1.68255	-127.82		-0.63765	-1.0449	-0.221329	-81.8242		-0.0285645	-0.192765	0	0	0	-336.622	-32.6135	-1550.46	0.257024		2103	-398.474	-17565	121.224	-9601.22	6.10462	4490.91
	84	341.271	70.7457	412.016		41.9277	28.8179			2104	420.016		-4.61831	-1238.06		2104	-34.4797	-954.325	3.47509	-259.401	1.53698e-06	178.527	0	1.53698e-06	-1.68255	-129.502		-0.63765	-1.0449	-0.220418	-82.0446		-0.0276532	-0.192765	0	0	0	-336.622	-32.9076	-1583.37	0.278915		2104	-469.612	-18034.6	115.025	-9486.19	6.04242	4496.95
	85	350.356	69.8104	420.166		41.1772	28.6332			2105	421.256		-4.54422	-1242.6		2105	-33.3127	-987.638	3.42934	-255.971	1.13804e-06	178.527	0	1.13804e-06	-1.68255	-131.185		-0.63765	-1.0449	-0.219596	-82.2642		-0.0268309	-0.192765	0	0	0	-336.622	-31.7855	-1615.15	0.299818		2105	-532.284	-18566.9	110.051	-9376.14	5.99843	4502.95
	86	359.492	68.8871	428.379		40.4478	28.4393			2106	422.476		-4.47498	-1247.08		2106	-33.4991	-1021.14	3.38529	-252.586	8.54733e-07	178.527	0	8.54733e-07	-1.68255	-132.867		-0.63765	-1.0449	-0.218842	-82.483		-0.0260768	-0.192765	0	0	0	-336.622	-32.0152	-1647.17	0.320826		2106	-588.675	-19155.6	106.018	-9270.12	5.96733	4508.92
	87	368.674	67.9755	436.649		39.738	28.2375			2107	423.679		-4.40976	-1251.48		2107	-33.6674	-1054.8	3.34251	-249.244	6.53225e-07	178.527	0	6.53225e-07	-1.68255	-134.55		-0.63765	-1.0449	-0.218141	-82.7012		-0.025376	-0.192765	0	0	0	-336.622	-32.2256	-1679.39	0.341921		2107	-639.433	-19795	102.708	-9167.41	5.94534	4514.86
	88	377.897	67.0753	444.973		39.0466	28.0287			2108	424.864		-4.34804	-1255.83		2108	-33.8194	-1088.62	3.30068	-245.943	5.09592e-07	178.527	0	5.09592e-07	-1.68255	-136.233		-0.63765	-1.0449	-0.217483	-82.9187		-0.0247178	-0.192765	0	0	0	-336.622	-32.4187	-1711.81	0.36309		2108	-685.083	-20480.1	99.953	-9067.46	5.92979	4520.79
	89	387.158	66.1864	453.345		38.3727	27.8137			2109	426.034		-4.28925	-1260.12		2109	-33.9572	-1122.58	3.25959	-242.683	4.06915e-07	178.527	0	4.06915e-07	-1.68255	-137.915		-0.63765	-1.0449	-0.216859	-83.1355		-0.0240944	-0.192765	0	0	0	-336.622	-32.597	-1744.41	0.384318		2109	-726.064	-21206.2	97.6251	-8969.84	5.91879	4526.71
	90	395.722	65.3084	461.03		37.7154	27.5931			2110	427.189		-4.23307	-1264.36		2110	-31.3998	-1153.98	3.21907	-239.464	3.33232e-07	178.527	0	3.33232e-07	-1.68255	-139.598		-0.63765	-1.0449	-0.216265	-83.3518		-0.0235001	-0.192765	0	0	0	-336.622	-30.0795	-1774.49	0.403474		2110	-760.066	-21966.2	95.6251	-8874.21	5.91102	4532.62
	91	404.309	64.4414	468.75		37.074	27.3675			2111	428.329		-4.1791	-1268.53		2111	-31.4856	-1185.47	3.17904	-236.285	2.8008e-07	178.527	0	2.8008e-07	-1.68255	-141.28		-0.63765	-1.0449	-0.215696	-83.5675		-0.0229308	-0.192765	0	0	0	-336.622	-30.2048	-1804.69	0.422661		2111	-790.07	-22756.3	93.8774	-8780.33	5.90552	4538.53
	92	412.918	63.5852	476.504		36.4479	27.1373			2112	429.454		-4.12711	-1272.66		2112	-31.5679	-1217.03	3.13941	-233.146	2.41475e-07	178.527	0	2.41475e-07	-1.68255	-142.963		-0.63765	-1.0449	-0.215148	-83.7826		-0.0223832	-0.192765	0	0	0	-336.622	-30.3262	-1835.02	0.441876		2112	-816.371	-23572.7	92.3237	-8688.01	5.90163	4544.43
	93	421.549	62.7397	484.289		35.8366	26.9032			2113	430.566		-4.07697	-1276.74		2113	-31.646	-1248.68	3.10014	-230.046	2.13186e-07	178.527	0	2.13186e-07	-1.68255	-144.645		-0.63765	-1.0449	-0.21462	-83.9972		-0.0218552	-0.192765	0	0	0	-336.622	-30.443	-1865.46	0.461117		2113	-839.238	-24411.9	90.9193	-8597.09	5.89888	4550.33
	94	430.2	61.9048	492.105		35.2395	26.6653			2114	431.665		-4.02836	-1280.77		2114	-31.7194	-1280.4	3.06121	-226.984	1.92218e-07	178.527	0	1.92218e-07	-1.68255	-146.328		-0.63765	-1.0449	-0.21411	-84.2114		-0.0213448	-0.192765	0	0	0	-336.622	-30.5549	-1896.02	0.480378		2114	-858.913	-25270.8	89.6298	-8507.46	5.89694	4556.23
	95	438.097	61.0805	499.178		34.6563	26.4242			2115	432.75		-3.98124	-1284.75		2115	-28.957	-1309.36	3.02258	-223.962	1.76453e-07	178.527	0	1.76453e-07	-1.68255	-148.01		-0.63765	-1.0449	-0.213615	-84.425		-0.0208507	-0.192765	0	0	0	-336.622	-27.8306	-1923.85	0.497452		2115	-872.793	-26143.6	88.4291	-8419.03	5.89556	4562.12
	96	446.003	60.2666	506.269		34.0865	26.1801			2116	433.824		-3.93546	-1288.68		2116	-28.9865	-1338.34	2.98425	-220.978	1.64394e-07	178.527	0	1.64394e-07	-1.68255	-149.693		-0.63765	-1.0449	-0.213136	-84.6381		-0.0203717	-0.192765	0	0	0	-336.622	-27.898	-1951.75	0.514528		2116	-883.883	-27027.5	87.2967	-8331.73	5.89459	4568.02
	97	453.917	59.4631	513.38		33.5297	25.9334			2117	434.885		-3.89085	-1292.57		2117	-29.0196	-1367.36	2.94622	-218.031	1.54979e-07	178.527	0	1.54979e-07	-1.68255	-151.375		-0.63765	-1.0449	-0.212672	-84.8508		-0.019907	-0.192765	0	0	0	-336.622	-27.9686	-1979.72	0.531607		2117	-892.392	-27919.9	86.2174	-8245.52	5.8939	4573.91
	98	461.841	58.6699	520.511		32.9855	25.6844			2118	435.934		-3.84742	-1296.42		2118	-29.0548	-1396.42	2.90848	-215.123	1.47459e-07	178.527	0	1.47459e-07	-1.68255	-153.058		-0.63765	-1.0449	-0.212221	-85.063		-0.0194559	-0.192765	0	0	0	-336.622	-28.0411	-2007.76	0.548691		2118	-898.515	-28818.4	85.1792	-8160.34	5.89342	4579.8
	99	469.775	57.8869	527.662		32.4535	25.4334			2119	436.972		-3.80506	-1300.23		2119	-29.091	-1425.51	2.87103	-212.252	1.41302e-07	178.527		1.41302e-07	-1.68255	-154.741		-0.63765	-1.0449	-0.211782	-85.2748		-0.0190176	-0.192765	0	0	0	-336.622	-28.1143	-2035.87	0.565782		2119	-902.437	-29720.9	84.1731	-8076.16	5.89307	4585.7
	100	288.179	177.741	465.92	10.907	139.448	27.3859			2120	437.998		-3.76367	-1303.99		2120	665.854	-759.655	-439.466	-651.718	99.7906	278.317	99.7906	1.01821e-06	-109.985	-264.725	-108.302	-0.63765	-1.0449	-5.31079	-90.5856	-5.09901	-0.0190176	-0.192765	0	0	-312.285	-648.907	-101.402	-2137.27	0.639025	0.244541	2120	-209.358	-29930.2	-359.108	-8435.27	105.683	4691.38
																																								Average	0.32352
																Further Ambition targets scenario																											Further Ambition targets scenario
																	1st planting (Mg CO2 eq)																							Plantation (Core)				31 yrs of planting (Mg CO2 eq)
																Year	Terrestrial C storage		HWP C storage		Forestry/ wood processing emissions (total)		Forestry/ primary wood processing emissions	Secondary wood processing emissions	(BE)CCS (total)		(BE)CCS (primary)	(BE)CCS (secondary)	(BE)CCS (tertiary)	FF offset (total)		Primary electricity offset (biomass + incineration)	Secondary electricity offset (biomass + incineration)	Tertiary electricity offset (biomass + incineration)	Heat offset (biomass)	Heat offset (incineration)	Concrete offset (net)		Net - annual flux	Net - cumulative C sequestration	% more net C accumulation compared to conservation		Year	Terrestrial C storage		HWP C storage		Forestry/ wood processing emissions (total)
																	Annual flux	Accumulation	Annual flux	Accumulation	Annual flux	Accumulation			Annual flux	Accumulation				Annual flux	Accumulation						Annual flux	Accumulation						Annual flux	Accumulation	Annual flux	Accumulation	Annual flux	Accumulation
																2020	0	0	0	0	5.00358	5.00358	5.00358	0	0	0	0	0	0	0	0	0	0	0	0	0	0	0	5.00358	5.00358	0		2020	0	0	0	0	5.00358	5.00358
																2021	0.599623	0.599623	0	0	0	5.00358	0	0	0	0	0	0	0	0	0	0	0	0	0	0	0	0	0.599623	5.6032	0.00425291		2021	0.599623	0.599623	0	0	5.00358	10.0072
																2022	-0.507923	0.0917007	0	0	0	5.00358	0	0	0	0	0	0	0	0	0	0	0	0	0	0	0	0	-0.507923	5.09528	-0.0229087		2022	0.0917007	0.691324	0	0	5.00358	15.0107
																2023	-1.92493	-1.83323	0	0	0	5.00358	0	0	0	0	0	0	0	0	0	0	0	0	0	0	0	0	-1.92493	3.17035	-0.156665		2023	-1.83323	-1.14191	0	0	5.00358	20.0143
																2024	-3.55635	-5.38958	0	0	0	5.00358	0	0	0	0	0	0	0	0	0	0	0	0	0	0	0	0	-3.55635	-0.386001	-1.34757		2024	-5.38958	-6.53149	0	0	5.00358	25.0179
																2025	-5.35193	-10.7415	0	0	0	5.00358	0	0	0	0	0	0	0	0	0	0	0	0	0	0	0	0	-5.35193	-5.73793	1.04537		2025	-10.7415	-17.273	0	0	5.00358	30.0215
																2026	-7.27359	-18.0151	0	0	0	5.00358	0	0	0	0	0	0	0	0	0	0	0	0	0	0	0	0	-7.27359	-13.0115	0.618371		2026	-18.0151	-35.2881	0	0	5.00358	35.0251
																2027	-9.28859	-27.3037	0	0	0	5.00358	0	0	0	0	0	0	0	0	0	0	0	0	0	0	0	0	-9.28859	-22.3001	0.524746		2027	-27.3037	-62.5918	0	0	5.00358	40.0286
																2028	-11.3672	-38.6709	0	0	0	5.00358	0	0	0	0	0	0	0	0	0	0	0	0	0	0	0	0	-11.3672	-33.6673	0.491189		2028	-38.6709	-101.263	0	0	5.00358	45.0322
																2029	-13.4824	-52.1533	0	0	0	5.00358	0	0	0	0	0	0	0	0	0	0	0	0	0	0	0	0	-13.4824	-47.1497	0.478212		2029	-52.1533	-153.416	0	0	5.00358	50.0358
																2030	-15.6095	-67.7629	0	0	0	5.00358	0	0	0	0	0	0	0	0	0	0	0	0	0	0	0	0	-15.6095	-62.7593	0.47428		2030	-67.7629	-221.179	0	0	5.00358	55.0394
																2031	-17.7267	-85.4896	0	0	0	5.00358	0	0	0	0	0	0	0	0	0	0	0	0	0	0	0	0	-17.7267	-80.486	0.474865		2031	-85.4896	-306.668	0	0	5.00358	60.043
																2032	-19.8148	-105.304	0	0	0	5.00358	0	0	0	0	0	0	0	0	0	0	0	0	0	0	0	0	-19.8148	-100.301	0.477865		2032	-105.304	-411.973	0	0	5.00358	65.0465
																2033	-21.8574	-127.162	0	0	0	5.00358	0	0	0	0	0	0	0	0	0	0	0	0	0	0	0	0	-21.8574	-122.158	0.482202		2033	-127.162	-539.135	0	0	5.00358	70.0501
																2034	-23.8412	-151.003	0	0	0	5.00358	0	0	0	0	0	0	0	0	0	0	0	0	0	0	0	0	-23.8412	-145.999	0.487285		2034	-151.003	-690.137	0	0	5.00358	75.0537
																2035	-25.7549	-176.758	0	0	0	5.00358	0	0	0	0	0	0	0	0	0	0	0	0	0	0	0	0	-25.7549	-171.754	0.492778		2035	-176.758	-866.895	0	0	5.00358	80.0573
																2036	-27.5896	-204.347	0	0	0	5.00358	0	0	0	0	0	0	0	0	0	0	0	0	0	0	0	0	-27.5896	-199.344	0.498488		2036	-204.347	-1071.24	0	0	5.00358	85.0609
																2037	-29.338	-233.685	0	0	0	5.00358	0	0	0	0	0	0	0	0	0	0	0	0	0	0	0	0	-29.338	-228.682	0.504301		2037	-233.685	-1304.93	0	0	5.00358	90.0644
																2038	-30.9935	-264.679	0	0	0	5.00358	0	0	0	0	0	0	0	0	0	0	0	0	0	0	0	0	-30.9935	-259.675	0.51015		2038	-264.679	-1569.61	0	0	5.00358	95.068
																2039	-32.5507	-297.23	0	0	0	5.00358	0	0	0	0	0	0	0	0	0	0	0	0	0	0	0	0	-32.5507	-292.226	0.515997		2039	-297.23	-1866.84	0	0	5.00358	100.072
																2040	-34.0044	-331.234	0	0	0	5.00358	0	0	0	0	0	0	0	0	0	0	0	0	0	0	0	0	-34.0044	-326.23	0.572032		2040	-331.234	-2198.07	0	0	2.75197	102.824
																2041	17.6073	-313.627	-24.8113	-24.8113	5.09947	10.103	5.09947	0	-15.866	-15.866	-14.1835	-0.63765	-1.0449	-0.782518	-0.782518	-0.782518	0	0	0	0	0	0	-18.7531	-344.983	0.533918		2041	-313.627	-2511.7	-24.8113	-24.8113	7.85144	110.675
																2042	-28.3006	-341.927	2.80517	-22.0061	2.38021e-07	10.103	0	2.38021e-07	-1.68255	-17.5486		-0.63765	-1.0449	-0.226574	-1.00909	0	-0.033809	-0.192765	0	0	0	0	-27.4045	-372.388	0.535511		2042	-341.927	-2853.62	-22.0061	-46.8174	7.85144	118.526
																2043	-30.5355	-372.463	0.986722	-21.0194	1.74186e-07	10.103	0	1.74186e-07	-1.68255	-19.2311		-0.63765	-1.0449	-0.217506	-1.2266	0	-0.0247417	-0.192765	0	0	0	0	-31.4488	-403.837	0.551508		2043	-372.463	-3226.09	-21.0194	-67.8368	7.85144	126.378
																2044	-32.4275	-404.89	0.778555	-20.2408	1.28892e-07	10.103	0	1.28892e-07	-1.68255	-20.9137		-0.63765	-1.0449	-0.211073	-1.43767	0	-0.0183081	-0.192765	0	0	0	0	-33.5425	-437.379	0.542601		2044	-404.89	-3630.98	-20.2408	-88.0777	7.85144	134.229
																2045	-34.0251	-438.915	0.630603	-19.6102	9.67131e-08	10.103	0	9.67131e-08	-1.68255	-22.5962		-0.63765	-1.0449	-0.206502	-1.64417	0	-0.0137373	-0.192765	0	0	0	0	-35.2836	-472.663	0.544409		2045	-438.915	-4069.89	-19.6102	-107.688	7.85144	142.081
																2046	-36.8851	-475.8	0.52522	-19.085	7.38122e-08	10.103	0	7.38122e-08	-1.68255	-24.2788		-0.63765	-1.0449	-0.203249	-1.84742	0	-0.0104844	-0.192765	0	0	0	0	-38.2457	-510.909	0.496817		2046	-475.8	-4545.69	-19.085	-126.773	7.85144	149.932
																2047	-35.2691	-511.07	0.449927	-18.6351	5.74758e-08	10.103	0	5.74758e-08	-1.68255	-25.9613		-0.63765	-1.0449	-0.200929	-2.04835	0	-0.00816398	-0.192765	0	0	0	0	-36.7026	-547.611	0.455603		2047	-511.07	-5056.76	-18.6351	-145.408	7.85144	157.784
																2048	-35.5086	-546.578	0.395902	-18.2392	4.57851e-08	10.103	0	4.57851e-08	-1.68255	-27.6438		-0.63765	-1.0449	-0.199268	-2.24762	0	-0.00650341	-0.192765	0	0	0	0	-36.9945	-584.606	0.423227		2048	-546.578	-5603.34	-18.2392	-163.647	7.85144	165.635
																2049	-35.7094	-582.288	0.356909	-17.8823	3.73832e-08	10.103	0	3.73832e-08	-1.68255	-29.3264		-0.63765	-1.0449	-0.198075	-2.44569	0	-0.00530998	-0.192765	0	0	0	0	-37.2331	-621.839	0.397262		2049	-582.288	-6185.63	-17.8823	-181.529	7.85144	173.487
																2050	-35.8788	-618.166	0.328537	-17.5537	1.33519e-08	10.103	0	1.33519e-08	-1.8695	-31.1959		-0.7085	-1.161	0	-2.44569	0	0	0	0	0	0	0	-37.4197	-659.259	0.376052		2050	-618.166	-6803.79	-17.5537	-199.083	2.37777	175.864
																2051	-36.9884	-655.155	0.30767	-17.2461	1.14662e-08	10.103	0	1.14662e-08	-1.8695	-33.0654		-0.7085	-1.161	0	-2.44569	0	0	0	0	0	0	0	-38.5502	-697.809	0.391768		2051	-655.155	-7458.95	-17.2461	-216.329	1.87741	177.742
																2052	-37.1136	-692.268	0.292104	-16.954	1.00797e-08	10.103	0	1.00797e-08	-1.8695	-34.9349		-0.7085	-1.161	0	-2.44569	0	0	0	0	0	0	0	-38.691	-736.5	0.406918		2052	-692.868	-8151.82	-16.954	-233.283	1.87741	179.619
																2053	-37.2206	-729.489	0.280281	-16.6737	9.04763e-09	10.103	0	9.04763e-09	-1.8695	-36.8044		-0.7085	-1.161	0	-2.44569	0	0	0	0	0	0	0	-38.8098	-775.31	0.421468		2053	-729.581	-8881.4	-16.6737	-249.957	1.87741	181.497
																2054	-37.312	-766.801	0.271101	-16.4026	8.2676e-09	10.103	0	8.2676e-09	-1.8695	-38.6739		-0.7085	-1.161	0	-2.44569	0	0	0	0	0	0	0	-38.9104	-814.22	0.435405		2054	-764.968	-9646.37	-16.4026	-266.36	1.87741	183.374
																2055	-37.3905	-804.191	0.263788	-16.1388	7.66714e-09	10.103	0	7.66714e-09	-1.8695	-40.5434		-0.7085	-1.161	0	-2.44569	0	0	0	0	0	0	0	-38.9962	-853.216	0.448733		2055	-798.802	-10445.2	-16.1388	-282.498	1.87741	185.251
																2056	-36.0712	-840.263	0.257791	-15.881	7.19499e-09	10.103	0	7.19499e-09	-1.8695	-42.4129		-0.7085	-1.161	0	-2.44569	0	0	0	0	0	0	0	-37.6829	-890.899	0.462817		2056	-829.521	-11274.7	-15.881	-298.379	1.87741	187.129
																2057	-36.1194	-876.382	0.252723	-15.6283	6.81486e-09	10.103	0	6.81486e-09	-1.8695	-44.2824		-0.7085	-1.161	0	-2.44569	0	0	0	0	0	0	0	-37.7362	-928.635	0.476323		2057	-858.367	-12133.1	-15.6283	-314.008	1.87741	189.006
																2058	-36.1622	-912.544	0.24831	-15.38	6.50104e-09	10.103	0	6.50104e-09	-1.8695	-46.1519		-0.7085	-1.161	0	-2.44569	0	0	0	0	0	0	0	-37.7834	-966.419	0.489268		2058	-885.24	-13018.3	-15.38	-329.388	1.87741	190.884
																2059	-36.1997	-948.744	0.244361	-15.1356	6.23535e-09	10.103	0	6.23535e-09	-1.8695	-48.0214		-0.7085	-1.161	0	-2.44569	0	0	0	0	0	0	0	-37.8248	-1004.24	0.501669		2059	-910.073	-13928.4	-15.1356	-344.523	1.87741	192.761
																2060	-36.2329	-984.977	0.240738	-14.8949	6.00485e-09	10.103	0	6.00485e-09	-1.8695	-49.8909		-0.7085	-1.161	0	-2.44569	0	0	0	0	0	0	0	-37.8616	-1042.11	0.513548		2060	-932.823	-14861.2	-14.8949	-359.418	1.87741	194.638
																2061	-33.5798	-1018.56	0.237346	-14.6575	5.8004e-09	10.103	0	5.8004e-09	-1.8695	-51.7604		-0.7085	-1.161	0	-2.44569	0	0	0	0	0	0	0	-35.212	-1077.32	0.524346		2061	-950.794	-15812	-14.6575	-374.076	1.87741	196.516
																2062	-33.5776	-1052.13	0.234119	-14.4234	5.61548e-09	10.103	0	5.61548e-09	-1.8695	-53.6299		-0.7085	-1.161	0	-2.44569	0	0	0	0	0	0	0	-35.213	-1112.53	0.534745		2062	-966.645	-16778.6	-14.4234	-388.499	1.87741	198.393
																2063	-33.5792	-1085.71	0.231009	-14.1924	5.44546e-09	10.103	0	5.44546e-09	-1.8695	-55.4994		-0.7085	-1.161	0	-2.44569	0	0	0	0	0	0	0	-35.2177	-1147.75	0.544761		2063	-980.409	-17759	-14.1924	-402.691	1.87741	200.271
																2064	-33.5828	-1119.3	0.227984	-13.9644	5.28704e-09	10.103	0	5.28704e-09	-1.8695	-57.3689		-0.7085	-1.161	0	-2.44569	0	0	0	0	0	0	0	-35.2243	-1182.97	0.554393		2064	-992.134	-18751.2	-13.9644	-416.656	1.87741	202.148
																2065	-33.5875	-1152.88	0.22502	-13.7394	5.13784e-09	10.103	0	5.13784e-09	-1.8695	-59.2384		-0.7085	-1.161	0	-2.44569	0	0	0	0	0	0	0	-35.232	-1218.2	0.563669		2065	-1001.88	-19753.1	-13.7394	-430.395	1.87741	204.025
																2066	-30.7614	-1183.65	0.222103	-13.5173	4.99615e-09	10.103	0	4.99615e-09	-1.8695	-61.1079		-0.7085	-1.161	0	-2.44569	0	0	0	0	0	0	0	-32.4088	-1250.61	0.571554		2066	-1006.89	-20759.9	-13.5173	-443.913	1.87741	205.903
																2067	-30.732	-1214.38	0.219221	-13.2981	4.86076e-09	10.103	0	4.86076e-09	-1.8695	-62.9773		-0.7085	-1.161	0	-2.44569	0	0	0	0	0	0	0	-32.3822	-1283	0.579183		2067	-1010.03	-21770	-13.2981	-457.211	1.87741	207.78
																2068	-30.7102	-1245.09	0.216367	-13.0817	4.73075e-09	10.103	0	4.73075e-09	-1.8695	-64.8468		-0.7085	-1.161	0	-2.44569	0	0	0	0	0	0	0	-32.3634	-1315.36	0.586566		2068	-1011.4	-22781.4	-13.0817	-470.292	1.87741	209.658
																2069	-30.6944	-1275.78	0.213536	-12.8682	4.60547e-09	10.103	0	4.60547e-09	-1.8695	-66.7163		-0.7085	-1.161	0	-2.44569	0	0	0	0	0	0	0	-32.3503	-1347.71	0.593714		2069	-1011.1	-23792.5	-12.8682	-483.161	1.87741	211.535
																2070	654.627	-621.154	-418.017	-430.885	42.9922	53.0952	42.9922	4.60547e-09	-100.956	-167.672	-99.0862	-0.7085	-1.161	-0.00260599	-2.4483	0	0	0	0	-0.00260599	-149.102	-149.102	29.5421	-1318.17	0.528861		2070	-323.925	-24116.4	-430.885	-914.046	44.8696	256.405
																2071	54.7601	-566.394	35.4692	-395.416	0.0530527	53.1483	0	0.0530527	-1.8695	-169.542		-0.7085	-1.161	-0.00260599	-2.45091		0	0	0	-0.00260599	0	-149.102	88.4103	-1229.76	0.401029		2071	-235.16	-24351.6	-395.416	-1309.46	44.9226	301.327
																2072	45.0223	-521.372	11.316	-384.1	0.0375137	53.1858	0	0.0375137	-1.8695	-171.411		-0.7085	-1.161	-0.00260599	-2.45351		0	0	0	-0.00260599	0	-149.102	54.5036	-1175.25	0.315663		2072	-207.745	-24559.3	-359.288	-1668.75	43.0827	344.41
																2073	36.6589	-484.713	9.67397	-374.426	0.0265263	53.2123	0	0.0265263	-1.8695	-173.281		-0.7085	-1.161	-0.00260599	-2.45612		0	0	0	-0.00260599	0	-149.102	44.4873	-1130.77	0.24428		2073	-142.786	-24702.1	-352.42	-2021.17	43.1093	387.519
																2074	29.3588	-455.354	8.40341	-366.022	0.018757	53.2311	0	0.018757	-1.8695	-175.15		-0.7085	-1.161	-0.00260599	-2.45872		0	0	0	-0.00260599	0	-149.102	35.9089	-1094.86	0.184607		2074	-82.8915	-24785	-345.003	-2366.17	43.128	430.647
																2075	22.8921	-432.462	7.41837	-358.604	0.0132633	53.2443	0	0.0132633	-1.8695	-177.02		-0.7085	-1.161	-0.00260599	-2.46133		0	0	0	-0.00260599	0	-149.102	28.4516	-1066.4	0.134863		2075	-27.5719	-24812.6	-338.363	-2704.54	43.1413	473.789
																2076	17.0904	-415.372	6.65266	-351.951	0.0093786	53.2537	0	0.0093786	-1.8695	-178.889		-0.7085	-1.161	-0.00260599	-2.46394		0	0	0	-0.00260599	0	-149.102	21.8804	-1044.52	0.0949619		2076	23.5436	-24789	-332.341	-3036.88	43.1507	516.939
																2077	11.8309	-403.541	6.05542	-345.896	0.00663173	53.2603	0	0.00663173	-1.8695	-180.759		-0.7085	-1.161	-0.00260599	-2.46654		0	0	0	-0.00260599	0	-149.102	16.0209	-1028.5	0.0623324		2077	72.2597	-24716.8	-326.811	-3363.69	43.1573	560.097
																2078	7.02363	-396.517	5.58754	-340.308	0.00468939	53.265	0	0.00468939	-1.8695	-182.628		-0.7085	-1.161	-0.00260599	-2.46915		0	0	0	-0.00260599	0	-149.102	10.7438	-1017.76	0.0360558		2078	114.552	-24602.2	-321.673	-3685.36	43.162	603.259
																2079	2.60238	-393.915	5.219	-335.089	0.00331595	53.2684	0	0.00331595	-1.8695	-184.498		-0.7085	-1.161	-0.00260599	-2.47175		0	0	0	-0.00260599	0	-149.102	5.95259	-1011.81	0.0153656		2079	152.663	-24449.5	-316.85	-4002.21	43.1653	646.424
																2080	-1.48191	-395.397	4.92676	-330.163	0.00234477	53.2707	0	0.00234477	-1.8695	-186.367		-0.7085	-1.161	-0.00260599	-2.47436		0	0	0	-0.00260599	0	-149.102	1.57509	-1010.23	-0.000452805		2080	186.891	-24262.6	-312.28	-4314.49	43.1676	689.592
																2081	-5.26639	-400.663	4.69314	-325.469	0.00165805	53.2724	0	0.00165805	-1.8695	-188.237		-0.7085	-1.161	-0.00260599	-2.47697		0	0	0	-0.00260599	0	-149.102	-2.44369	-1012.68	-0.0108475		2081	217.503	-24045.1	-307.916	-4622.41	43.1693	732.761
																2082	-8.77949	-409.443	4.50457	-320.965	0.00117246	53.2735	0	0.00117246	-1.8695	-190.106		-0.7085	-1.161	-0.00260599	-2.47957		0	0	0	-0.00260599	0	-149.102	-6.14584	-1018.82	-0.0173773		2082	245.712	-23799.4	-303.719	-4926.13	43.1705	775.931
																2083	-12.0439	-421.486	4.35064	-316.614	0.000829089	53.2744	0	0.000829089	-1.8695	-191.976		-0.7085	-1.161	-0.00260599	-2.48218		0	0	0	-0.00260599	0	-149.102	-9.56455	-1028.39	-0.0204612		2083	270.782	-23528.6	-299.66	-5225.79	43.1713	819.103
																2084	-15.0777	-436.564	4.22335	-312.391	0.000586291	53.2749	0	0.000586291	-1.8695	-193.845		-0.7085	-1.161	-0.00260599	-2.48478		0	0	0	-0.00260599	0	-149.102	-12.7259	-1041.11	-0.0204718		2084	292.925	-23235.7	-295.717	-5521.5	43.1719	862.275
																2085	-17.8959	-454.46	4.11656	-308.274	0.000290682	53.2752	0	0.000290682	-1.8695	-195.715		-0.7085	-1.161	0	-2.48478		0	0	0	0	0	-149.102	-15.6486	-1056.76	-0.0177453		2085	312.341	-22923.4	-291.872	-5813.38	30.2684	892.543
																2086	-20.5107	-474.971	4.02554	-304.249	0.000205567	53.2754	0	0.000205567	-1.8695	-197.584		-0.7085	-1.161	0	-2.48478		0	0	0	0	0	-149.102	-18.3545	-1075.12	-0.0114656		2086	329.221	-22594.2	-288.11	-6101.49	30.2686	922.812
																2087	-22.9322	-497.903	3.94668	-300.302	0.00014538	53.2756	0	0.00014538	-1.8695	-199.454		-0.7085	-1.161	0	-2.48478		0	0	0	0	0	-149.102	-20.8548	-1095.97	-0.00300572		2087	342.36	-22251.8	-284.421	-6385.91	30.2688	953.08
																2088	-25.1684	-523.071	3.87718	-296.425	0.000102821	53.2757	0	0.000102821	-1.8695	-201.323		-0.7085	-1.161	0	-2.48478		0	0	0	0	0	-149.102	-23.1606	-1119.13	0.00738631		2088	353.311	-21898.5	-280.797	-6666.7	30.2689	983.349
																2089	-27.2256	-550.297	3.8149	-292.61	7.27268e-05	53.2758	0	7.27268e-05	-1.8695	-203.192		-0.7085	-1.161	0	-2.48478		0	0	0	0	0	-149.102	-25.2801	-1144.41	0.0194811		2089	362.247	-21536.2	-277.23	-6943.93	30.2689	1013.62
																2090	-29.1086	-579.405	3.75818	-288.852	5.14462e-05	53.2758	0	5.14462e-05	-1.8695	-205.062		-0.7085	-1.161	0	-2.48478		0	0	0	0	0	-149.102	-27.2198	-1171.63	0.0330654		2090	369.338	-21166.9	-273.716	-7217.65	30.269	1043.89
																2091	28.2574	-551.148	-40.7597	-329.612	1.76168	55.0375	1.7615	0.000179491	-19.5948	-224.657	-17.7253	-0.7085	-1.161	0	-2.48478	0	0	0	0	0	0	-149.102	-30.3354	-1201.97	0.0497202		2091	433.829	-20733.1	-314.717	-7532.37	32.0307	1075.92
																2092	-23.3968	-574.545	23.2842	-306.327	2.58365e-05	55.0375	0	2.58365e-05	-1.8695	-226.526		-0.7085	-1.161	0	-2.48478		0	0	0	0	0	-149.102	-1.98206	-1203.95	0.0415661		2092	444.012	-20289.1	-291.67	-7824.04	32.0307	1107.95
																2093	-25.9644	-600.509	4.72222	-301.605	1.829e-05	55.0375	0	1.829e-05	-1.8695	-228.396		-0.7085	-1.161	0	-2.48478		0	0	0	0	0	-149.102	-23.1116	-1227.06	0.0517037		2093	451.625	-19837.4	-287.182	-8111.22	32.0307	1139.98
																2094	-28.1377	-628.647	4.44339	-297.162	1.29532e-05	55.0375	0	1.29532e-05	-1.8695	-230.265		-0.7085	-1.161	0	-2.48478		0	0	0	0	0	-149.102	-25.5638	-1252.62	0.0637644		2094	457.066	-19380.4	-282.969	-8394.19	32.0307	1172.01
																2095	-31.493	-660.14	4.23386	-292.928	9.17898e-06	55.0376	0	9.17898e-06	-1.8695	-232.135		-0.7085	-1.161	0	-2.48478		0	0	0	0	0	-149.102	-29.1286	-1281.75	0.0786305		2095	459.156	-18921.2	-278.964	-8673.15	32.0307	1204.04
																2096	-30.3066	-690.446	4.07344	-288.855	6.5097e-06	55.0376	0	6.5097e-06	-1.8695	-234.004		-0.7085	-1.161	0	-2.48478		0	0	0	0	0	-149.102	-28.1026	-1309.85	0.0963864		2096	462.437	-18458.8	-275.115	-8948.27	32.0307	1236.07
																2097	-30.9215	-721.368	3.94783	-284.907	4.62174e-06	55.0376	0	4.62174e-06	-1.8695	-235.874		-0.7085	-1.161	0	-2.48478		0	0	0	0	0	-149.102	-28.8432	-1338.7	0.114693		2097	462.277	-17996.5	-271.389	-9219.66	32.0307	1268.1
																2098	-31.4525	-752.821	3.84689	-281.06	3.28627e-06	55.0376	0	3.28627e-06	-1.8695	-237.743		-0.7085	-1.161	0	-2.48478		0	0	0	0	0	-149.102	-29.4751	-1368.17	0.133442		2098	461.557	-17534.9	-267.762	-9487.42	32.0307	1300.13
																2099	-31.9141	-784.735	3.76347	-277.296	2.3415e-06	55.0376	0	2.3415e-06	-1.8695	-239.613		-0.7085	-1.161	0	-2.48478		0	0	0	0	0	-149.102	-30.0201	-1398.19	0.152549		2099	460.353	-17074.6	-264.215	-9751.63	32.0307	1332.16
																2100	-33.2832	-818.018	3.69248	-273.604	1.67301e-06	55.0376	0	1.67301e-06	-1.8695	-241.482		-0.7085	-1.161	0	-2.48478		0	0	0	0	0	-149.102	-31.4603	-1429.65	0.172738		2100	457.764	-16616.8	-260.736	-10012.4	32.0308	1364.19
																2101	-33.6402	-851.658	3.63034	-269.974	1.19988e-06	55.0376	0	1.19988e-06	-1.8695	-243.352		-0.7085	-1.161	0	-2.48478		0	0	0	0	0	-149.102	-31.8794	-1461.53	0.194107		2101	-230.504	-16847.3	160.911	-9851.46	1.88864	1366.08
																2102	-33.9547	-885.613	3.57451	-266.399	8.64922e-07	55.0376	0	8.64922e-07	-1.8695	-245.221		-0.7085	-1.161	0	-2.48478		0	0	0	0	0	-149.102	-32.2497	-1493.78	0.215703		2102	-319.219	-17166.6	129.017	-9722.44	1.85144	1367.93
																2103	-34.2328	-919.846	3.52318	-262.876	6.2767e-07	55.0376	0	6.2767e-07	-1.8695	-247.091		-0.7085	-1.161	0	-2.48478		0	0	0	0	0	-149.102	-32.5791	-1526.36	0.237486		2103	-398.474	-17565	121.224	-9601.22	1.82514	1369.76
																2104	-34.4797	-954.325	3.47509	-259.401	4.59522e-07	55.0376	0	4.59522e-07	-1.8695	-248.96		-0.7085	-1.161	0	-2.48478		0	0	0	0	0	-149.102	-32.8741	-1559.24	0.259423		2104	-469.612	-18034.6	115.025	-9486.19	1.80655	1371.57
																2105	-33.3127	-987.638	3.42934	-255.971	3.40248e-07	55.0376	0	3.40248e-07	-1.8695	-250.83		-0.7085	-1.161	0	-2.48478		0	0	0	0	0	-149.102	-31.7528	-1590.99	0.280371		2105	-532.284	-18566.9	110.051	-9376.14	1.7934	1373.36
																2106	-33.4991	-1021.14	3.38529	-252.586	2.55546e-07	55.0376	0	2.55546e-07	-1.8695	-252.699		-0.7085	-1.161	0	-2.48478		0	0	0	0	0	-149.102	-31.9833	-1622.97	0.301423		2106	-588.675	-19155.6	106.018	-9270.12	1.7841	1375.14
																2107	-33.6674	-1054.8	3.34251	-249.244	1.95299e-07	55.0376	0	1.95299e-07	-1.8695	-254.569		-0.7085	-1.161	0	-2.48478		0	0	0	0	0	-149.102	-32.1944	-1655.17	0.322562		2107	-639.433	-19795	102.708	-9167.41	1.77752	1376.92
																2108	-33.8194	-1088.62	3.30068	-245.943	1.52356e-07	55.0376	0	1.52356e-07	-1.8695	-256.438		-0.7085	-1.161	0	-2.48478		0	0	0	0	0	-149.102	-32.3882	-1687.55	0.343773		2108	-685.083	-20480.1	99.953	-9067.46	1.77287	1378.69
																2109	-33.9572	-1122.58	3.25959	-242.683	1.21658e-07	55.0376	0	1.21658e-07	-1.8695	-258.308		-0.7085	-1.161	0	-2.48478		0	0	0	0	0	-149.102	-32.5671	-1720.12	0.365043		2109	-726.064	-21206.2	97.6251	-8969.84	1.76958	1380.46
																2110	-31.3998	-1153.98	3.21907	-239.464	9.96288e-08	55.0376	0	9.96288e-08	-1.8695	-260.177		-0.7085	-1.161	0	-2.48478		0	0	0	0	0	-149.102	-30.0502	-1750.17	0.384241		2110	-760.066	-21966.2	95.6251	-8874.21	1.76726	1382.23
																2111	-31.4856	-1185.47	3.17904	-236.285	8.37375e-08	55.0376	0	8.37375e-08	-1.8695	-262.047		-0.7085	-1.161	0	-2.48478		0	0	0	0	0	-149.102	-30.1761	-1780.35	0.403468		2111	-790.07	-22756.3	93.8774	-8780.33	1.76562	1384
																2112	-31.5679	-1217.03	3.13941	-233.146	7.21956e-08	55.0376	0	7.21956e-08	-1.8695	-263.916		-0.7085	-1.161	0	-2.48478		0	0	0	0	0	-149.102	-30.298	-1810.65	0.422724		2112	-816.371	-23572.7	92.3237	-8688.01	1.76445	1385.76
																2113	-31.646	-1248.68	3.10014	-230.046	6.37377e-08	55.0376	0	6.37377e-08	-1.8695	-265.786		-0.7085	-1.161	0	-2.48478		0	0	0	0	0	-149.102	-30.4154	-1841.06	0.442003		2113	-839.238	-24411.9	90.9193	-8597.09	1.76363	1387.52
																2114	-31.7194	-1280.4	3.06121	-226.984	5.74687e-08	55.0376	0	5.74687e-08	-1.8695	-267.655		-0.7085	-1.161	0	-2.48478		0	0	0	0	0	-149.102	-30.5277	-1871.59	0.461303		2114	-858.913	-25270.8	89.6298	-8507.46	1.76305	1389.29
																2115	-28.957	-1309.36	3.02258	-223.962	5.27554e-08	55.0376	0	5.27554e-08	-1.8695	-269.525		-0.7085	-1.161	0	-2.48478		0	0	0	0	0	-149.102	-27.8039	-1899.39	0.478417		2115	-872.793	-26143.6	88.4291	-8419.03	1.76264	1391.05
																2116	-28.9865	-1338.34	2.98425	-220.978	4.915e-08	55.0376	0	4.915e-08	-1.8695	-271.394		-0.7085	-1.161	0	-2.48478		0	0	0	0	0	-149.102	-27.8718	-1927.26	0.49553		2116	-883.883	-27027.5	87.2967	-8331.73	1.76235	1392.81
																2117	-29.0196	-1367.36	2.94622	-218.031	4.63353e-08	55.0376	0	4.63353e-08	-1.8695	-273.264		-0.7085	-1.161	0	-2.48478		0	0	0	0	0	-149.102	-27.9429	-1955.21	0.512646		2117	-892.392	-27919.9	86.2174	-8245.52	1.76214	1394.57
																2118	-29.0548	-1396.42	2.90848	-215.123	4.4087e-08	55.0376	0	4.4087e-08	-1.8695	-275.133		-0.7085	-1.161	0	-2.48478		0	0	0	0	0	-149.102	-28.0159	-1983.22	0.529767		2118	-898.515	-28818.4	85.1792	-8160.34	1.762	1396.34
																2119	-29.091	-1425.51	2.87103	-212.252	4.22462e-08	55.0376		4.22462e-08	-1.8695	-277.003		-0.7085	-1.161	0	-2.48478		0	0	0	0	0	-149.102	-28.0894	-2011.31	0.546894		2119	-902.437	-29720.9	84.1731	-8076.16	1.76189	1398.1
																2120	665.854	-759.655	-439.466	-651.718	29.8351	84.8727	29.8351	3.04421e-07	-141.887	-418.889	-140.017	-0.7085	-1.161	0	-2.48478	0	0	0	0	0	-98.3429	-247.445	15.9939	-1995.32	0.530164		2120	-209.358	-29930.2	-359.108	-8435.27	31.5969	1429.7
																																								average	0.319221
[truncated: 73 more columns]

## Sheet: Yr2
																Summary of emissions discounts to apply (to 2020 assumptions):
																	2020-2029		2030-2039		2040-2049		2050-2084		2085-2120
																	Core	FA	Core	FA	Core	FA	Core	FA	Core	FA
																Avoided emissions - Biomass (heat) - marginal supply	none	none	none	none	none	0.25258	0.9	0.039435	0	0
																Avoided emissions - Biomass (electricity) - marginal supply	none	none	0.9127	0.5635	0.8254	0.127	0.5635	0	0.127	0
																Avoided emissions - Incineration (electricity) - marginal supply	none	none	0.9127	0.5635	0.8254	0.127	0.5635	0	0.127	0
																Incineration (heat) - marginal supply	none	none	none	none	none	0	0.9	0.136905	0	0
																C storage - BECCS (biomass electricity)	none	none	0.09	0.45	0.18	0.9	0.45	1	0.9	1
																C storage - BECCS (biomass heat)	none	none	0	0	0	0.405	0	0.81	0.405	0.9
																Avoided emissions - Cement production - CCS application (calcination)	n/a	n/a	n/a	n/a	n/a	n/a	none	0.45568	0.93952	0.3952
																Avoided emissions - Cement production - furnace emissions reduction	n/a	n/a	n/a	n/a	n/a	n/a	0.9784	0.95104	0.95104	0.712
																Emissions - Wood panel (particle board) production (CCS on heat production)	none	none	none	none	none	0.6355	none	0.271	0.6355	0.19
																Emissions - Harvester/forwarder	none	none	none	none	none	0.55	0.87	0.1	0	0
	Annual C stock - total ecosystem (tonnes C) - >75% thin									Natural Forest' C sequestration
	Time Step	Total Ecosystem(GH model (thinned) average soil v3 Default Simu			Thinned	Thinned	Thinned				'Total Ecosystem(Afforestation (conservation) Default Simulation					Core targets scenario
		Forest ecosystem	HWP total	Net system C	Mulch/S C storage	HWP primary	HWP secondary				Net ecosystem C	Process emissions	Annual C flux	Net cumulative C sequestration and storage			2nd planting (Mg CO2 eq)																							Plantation (Core)
	Year	Tonnes C	Tonnes C		Tonnes C					Year	Tonnes C	Tonnes C	Mg CO2eq			Year	Terrestrial C storage		HWP C storage		Forestry/ wood processing emissions (total)		Forestry/ primary wood processing emissions	Secondary wood processing emissions	(BE)CCS (total)		(BE)CCS (primary)	(BE)CCS (secondary)	(BE)CCS (tertiary)	FF offset (total)		Primary electricity offset (biomass + incineration)	Secondary electricity offset (biomass + incineration)	Tertiary electricity offset (biomass + incineration)	Heat offset (biomass)	Heat offset (incineration)	Concrete offset (net)		Net - annual flux	Net - cumulative C sequestration
																	Annual flux	Accumulation	Annual flux	Accumulation	Annual flux	Accumulation			Annual flux	Accumulation				Annual flux	Accumulation						Annual flux	Accumulation
	0	81	0	81	0	0	0			0						2020
	1	80.8365	0	80.8365		0	0			1	81	1.36461	5.00358	5.00358		2021	0	0	0	0	5.00358	5.00358	5.00358	0	0	0	0	0	0	0	0	0	0	0	0	0	0	0	5.00358	5.00358
	2	80.975	0	80.975		0	0			2	80.8429		0.575894	5.57947		2022	0.599623	0.599623	0	0	0	5.00358	0	0	0	0	0	0	0	0	0	0	0	0	0	0	0	0	0.599623	5.6032
	3	81.5	0	81.5		0	0			3	80.9424		-0.36473	5.21474		2023	-0.507923	0.0917007	0	0	0	5.00358	0	0	0	0	0	0	0	0	0	0	0	0	0	0	0	0	-0.507923	5.09528
	4	82.4699	0	82.4699		0	0			4	81.3393		-1.45544	3.7593		2024	-1.92493	-1.83323	0	0	0	5.00358	0	0	0	0	0	0	0	0	0	0	0	0	0	0	0	0	-1.92493	3.17035
	5	83.9295	0	83.9295		0	0			5	82.0617		-2.64872	1.11058		2025	-3.55635	-5.38958	0	0	0	5.00358	0	0	0	0	0	0	0	0	0	0	0	0	0	0	0	0	-3.55635	-0.386001
	6	85.9132	0	85.9132		0	0			6	83.1297		-3.91591	-2.80532		2026	-5.35193	-10.7415	0	0	0	5.00358	0	0	0	0	0	0	0	0	0	0	0	0	0	0	0	0	-5.35193	-5.73793
	7	88.4465	0	88.4465		0	0			7	84.5573		-5.23457	-8.03989		2027	-7.27359	-18.0151	0	0	0	5.00358	0	0	0	0	0	0	0	0	0	0	0	0	0	0	0	0	-7.27359	-13.0115
	8	91.5466	0	91.5466		0	0			8	86.3534		-6.58557	-14.6255		2028	-9.28859	-27.3037	0	0	0	5.00358	0	0	0	0	0	0	0	0	0	0	0	0	0	0	0	0	-9.28859	-22.3001
	9	95.2236	0	95.2236		0	0			9	88.5221		-7.95205	-22.5775		2029	-11.3672	-38.6709	0	0	0	5.00358	0	0	0	0	0	0	0	0	0	0	0	0	0	0	0	0	-11.3672	-33.6673
	10	99.4808	0	99.4808		0	0			10	91.0637		-9.31896	-31.8965		2030	-13.4824	-52.1533	0	0	0	5.00358	0	0	0	0	0	0	0	0	0	0	0	0	0	0	0	0	-13.4824	-47.1497
	11	104.315	0	104.315		0	0			11	93.9745		-10.673	-42.5695		2031	-15.6095	-67.7629	0	0	0	5.00358	0	0	0	0	0	0	0	0	0	0	0	0	0	0	0	0	-15.6095	-62.7593
	12	109.719	0	109.719		0	0			12	97.2478		-12.0023	-54.5718		2032	-17.7267	-85.4896	0	0	0	5.00358	0	0	0	0	0	0	0	0	0	0	0	0	0	0	0	0	-17.7267	-80.486
	13	115.68	0	115.68		0	0			13	100.874		-13.2969	-67.8687		2033	-19.8148	-105.304	0	0	0	5.00358	0	0	0	0	0	0	0	0	0	0	0	0	0	0	0	0	-19.8148	-100.301
	14	122.183	0	122.183		0	0			14	104.842		-14.548	-82.4167		2034	-21.8574	-127.162	0	0	0	5.00358	0	0	0	0	0	0	0	0	0	0	0	0	0	0	0	0	-21.8574	-122.158
	15	129.207	0	129.207		0	0			15	109.137		-15.7483	-98.165		2035	-23.8412	-151.003	0	0	0	5.00358	0	0	0	0	0	0	0	0	0	0	0	0	0	0	0	0	-23.8412	-145.999
	16	136.731	0	136.731		0	0			16	113.744		-16.8918	-115.057		2036	-25.7549	-176.758	0	0	0	5.00358	0	0	0	0	0	0	0	0	0	0	0	0	0	0	0	0	-25.7549	-171.754
	17	144.732	0	144.732		0	0			17	118.646		-17.9733	-133.03		2037	-27.5896	-204.347	0	0	0	5.00358	0	0	0	0	0	0	0	0	0	0	0	0	0	0	0	0	-27.5896	-199.344
	18	153.185	0	153.185		0	0			18	123.824		-18.9887	-152.019		2038	-29.338	-233.685	0	0	0	5.00358	0	0	0	0	0	0	0	0	0	0	0	0	0	0	0	0	-29.338	-228.682
	19	162.063	0	162.063		0	0			19	129.261		-19.9347	-171.953		2039	-30.9935	-264.679	0	0	0	5.00358	0	0	0	0	0	0	0	0	0	0	0	0	0	0	0	0	-30.9935	-259.675
	20	171.337	0	171.337		0	0			20	134.936		-20.8082	-192.762		2040	-32.5507	-297.23	0	0	0	5.00358	0	0	0	0	0	0	0	0	0	0	0	0	0	0	0	0	-32.5507	-292.226
	21	166.535	6.76672	173.301	0.415937	6.35078	0			21	138.961		-14.7598	-207.521		2041	-34.0044	-331.234	0	0	0	5.00358	0	0	0	0	0	0	0	0	0	0	0	0	0	0	0	0	-34.0044	-326.23
	22	174.253	6.00167	180.255		5.40511	0.596564			22	143.702		-17.382	-224.903		2042	17.6073	-313.627	-24.8113	-24.8113	8.32153	13.3251	8.32153	0	-3.1732	-3.1732	-2.83669	-0.12753	-0.20898	-5.08575	-5.08575	-5.08575	0	0	0	0	0	0	-7.14141	-333.372
	23	182.581	5.73256	188.313		4.71306	1.01951			23	148.506		-17.6139	-242.517		2043	-28.3006	-341.927	2.80517	-22.0061	3.74541e-07	13.3251	0	3.74541e-07	-0.33651	-3.50971		-0.12753	-0.20898	-1.47255	-6.5583	0	-0.219732	-1.25282	0	0	0	0	-27.3045	-360.676
	24	191.425	5.52023	196.945		4.20096	1.31927			24	153.352		-17.7693	-260.287		2044	-30.5355	-372.463	0.986722	-21.0194	2.74092e-07	13.3251	0	2.74092e-07	-0.33651	-3.84622		-0.12753	-0.20898	-1.41362	-7.97192	0	-0.160801	-1.25282	0	0	0	0	-31.2989	-391.975
	25	200.704	5.34825	206.052		3.81671	1.53154			25	159.692		-23.2471	-283.534		2045	-32.4275	-404.89	0.778555	-20.2408	2.0282e-07	13.3251	0	2.0282e-07	-0.33651	-4.18273		-0.12753	-0.20898	-1.37181	-9.34373	0	-0.118988	-1.25282	0	0	0	0	-33.3572	-425.332
	26	210.764	5.20501	215.969		3.52345	1.68155			26	165.832		-22.5139	-306.048		2046	-34.0251	-438.915	0.630603	-19.6102	1.52184e-07	13.3251	0	1.52184e-07	-0.33651	-4.51924		-0.12753	-0.20898	-1.3421	-10.6858	0	-0.0892818	-1.25282	0	0	0	0	-35.0731	-460.406
	27	220.383	5.0823	225.465		3.2951	1.7872			27	175.455		-35.2823	-341.33		2047	-36.8851	-475.8	0.52522	-19.085	1.16148e-07	13.3251	0	1.16148e-07	-0.33651	-4.85575		-0.12753	-0.20898	-1.32096	-12.0068	0	-0.0681406	-1.25282	0	0	0	0	-38.0174	-498.423
	28	230.067	4.97433	235.041		3.11319	1.86114			28	184.967		-34.8791	-376.209		2048	-35.2691	-511.07	0.449927	-18.6351	9.04419e-08	13.3251	0	9.04419e-08	-0.33651	-5.19226		-0.12753	-0.20898	-1.30588	-13.3127	0	-0.0530594	-1.25282	0	0	0	0	-36.4615	-534.884
	29	239.806	4.87699	244.683		2.96466	1.91232			29	194.39		-34.5515	-410.761		2049	-35.5086	-546.578	0.395902	-18.2392	7.20458e-08	13.3251	0	7.20458e-08	-0.33651	-5.52877		-0.12753	-0.20898	-1.29509	-14.6078	0	-0.042267	-1.25282	0	0	0	0	-36.7443	-571.629
	30	249.591	4.78739	254.378		2.84026	1.94712			30	203.739		-34.2804	-445.041		2050	-35.7094	-582.288	0.356909	-17.8823	5.88248e-08	13.3251	0	5.88248e-08	-0.841274	-6.37004		-0.318825	-0.522449	-0.878859	-15.4866	0	-0.0235604	-0.855299	0	0	0	0	-37.0726	-608.701
	31	259.679	4.70348	264.382		2.73343	1.97004			31	213.027		-34.0532	-479.094		2051	-35.8788	-618.166	0.328537	-17.5537	4.92691e-08	13.3251	0	4.92691e-08	-0.841274	-7.21132		-0.318825	-0.522449	-0.875032	-16.3616	0	-0.0197332	-0.855299	0	0	0	0	-37.2665	-645.968
	32	269.8	4.62381	274.424		2.63952	1.98429			32	219.105		-22.2888	-501.383		2052	-36.9884	-655.155	0.30767	-17.2461	4.23108e-08	13.3251	0	4.23108e-08	-0.841274	-8.05259		-0.318825	-0.522449	-0.872245	-17.2339	0	-0.0169462	-0.855299	0	0	0	0	-38.3942	-684.362
	33	279.952	4.54737	284.499		2.55523	1.99214			33	225.133		-22.1014	-523.484		2053	-37.1136	-692.268	0.292104	-16.954	3.71945e-08	13.3251	0	3.71945e-08	-0.841274	-8.89386		-0.318825	-0.522449	-0.870196	-18.1041	0	-0.0148971	-0.855299	0	0	0	0	-38.533	-722.895
	34	290.127	4.47343	294.601		2.4782	1.99523			34	231.118		-21.9445	-545.429		2054	-37.2206	-729.489	0.280281	-16.6737	3.33861e-08	13.3251	0	3.33861e-08	-0.841274	-9.73514		-0.318825	-0.522449	-0.868671	-18.9728	0	-0.0133718	-0.855299	0	0	0	0	-38.6502	-761.545
	35	300.325	4.40149	304.726		2.40676	1.99473			35	237.067		-21.8117	-567.241		2055	-37.312	-766.801	0.271101	-16.4026	3.05077e-08	13.3251	0	3.05077e-08	-0.841274	-10.5764		-0.318825	-0.522449	-0.867518	-19.8403	0	-0.0122189	-0.855299	0	0	0	0	-38.7497	-800.295
	36	310.163	4.33118	314.494		2.33973	1.99146			36	242.985		-21.699	-588.94		2056	-37.3905	-804.191	0.263788	-16.1388	2.8292e-08	13.3251	0	2.8292e-08	-0.841274	-11.4177		-0.318825	-0.522449	-0.86663	-20.7069	0	-0.0113315	-0.855299	0	0	0	0	-38.8346	-839.13
	37	320.013	4.26226	324.276		2.27624	1.98602			37	248.464		-20.0901	-609.03		2057	-36.0712	-840.263	0.257791	-15.881	2.65498e-08	13.3251	0	2.65498e-08	-0.841274	-12.259		-0.318825	-0.522449	-0.865932	-21.5728	0	-0.0106337	-0.855299	0	0	0	0	-37.5206	-876.65
	38	329.876	4.19454	334.07		2.21567	1.97887			38	253.915		-19.989	-629.019		2058	-36.1194	-876.382	0.252723	-15.6283	2.51471e-08	13.3251	0	2.51471e-08	-0.841274	-13.1002		-0.318825	-0.522449	-0.865371	-22.4382	0	-0.0100719	-0.855299	0	0	0	0	-37.5733	-914.224
	39	339.748	4.1279	343.876		2.15757	1.97032			39	259.343		-19.9032	-648.922		2059	-36.1622	-912.544	0.24831	-15.38	2.39891e-08	13.3251	0	2.39891e-08	-0.841274	-13.9415		-0.318825	-0.522449	-0.864907	-23.3031	0	-0.00960808	-0.855299	0	0	0	0	-37.62	-951.844
	40	349.63	4.06224	353.692		2.10163	1.96061			40	264.751		-19.8296	-668.752		2060	-36.1997	-948.744	0.244361	-15.1356	2.30087e-08	13.3251	0	2.30087e-08	-0.841274	-14.7828		-0.318825	-0.522449	-0.864514	-24.1676	0	-0.00921539	-0.855299	0	0	0	0	-37.6611	-989.505
	41	358.788	3.99751	362.786		2.04758	1.94993			41	270.142		-19.7665	-688.518		2061	-36.2329	-984.977	0.240738	-14.8949	2.21581e-08	13.3251	0	2.21581e-08	-0.841274	-15.6241		-0.318825	-0.522449	-0.864174	-25.0318	0	-0.00887474	-0.855299	0	0	0	0	-37.6976	-1027.2
	42	367.946	3.93366	371.879		1.99526	1.93839			42	275.112		-18.2224	-706.74		2062	-33.5798	-1018.56	0.237346	-14.6575	2.14037e-08	13.3251	0	2.14037e-08	-0.841274	-16.4653		-0.318825	-0.522449	-0.863871	-25.8957	0	-0.00857257	-0.855299	0	0	0	0	-35.0476	-1062.25
	43	377.104	3.87066	380.974		1.94453	1.92613			43	280.063		-18.1553	-724.896		2063	-33.5776	-1052.13	0.234119	-14.4234	2.07213e-08	13.3251	0	2.07213e-08	-0.841274	-17.3066		-0.318825	-0.522449	-0.863598	-26.7593	0	-0.00829928	-0.855299	0	0	0	0	-35.0484	-1097.3
	44	386.263	3.80848	390.071		1.89527	1.91321			44	284.999		-18.0982	-742.994		2064	-33.5792	-1085.71	0.231009	-14.1924	2.0094e-08	13.3251	0	2.0094e-08	-0.841274	-18.1479		-0.318825	-0.522449	-0.863347	-27.6226	0	-0.00804801	-0.855299	0	0	0	0	-35.0529	-1132.35
	45	395.423	3.74711	399.17		1.8474	1.89971			45	289.924		-18.0569	-761.051		2065	-33.5828	-1119.3	0.227984	-13.9644	1.95094e-08	13.3251	0	1.95094e-08	-0.841274	-18.9892		-0.318825	-0.522449	-0.863113	-28.4857	0	-0.00781386	-0.855299	0	0	0	0	-35.0592	-1167.41
	46	403.812	3.68654	407.499		1.80085	1.88568			46	294.838		-18.0171	-779.068		2066	-33.5875	-1152.88	0.22502	-13.7394	1.89588e-08	13.3251	0	1.89588e-08	-0.841274	-19.8304		-0.318825	-0.522449	-0.862892	-29.3486	0	-0.00759335	-0.855299	0	0	0	0	-35.0667	-1202.48
	47	412.194	3.62675	415.82		1.75557	1.87118			47	299.396		-16.7129	-795.781		2067	-30.7614	-1183.65	0.222103	-13.5173	1.8436e-08	13.3251	0	1.8436e-08	-0.841274	-20.6717		-0.318825	-0.522449	-0.862683	-30.2113	0	-0.00738395	-0.855299	0	0	0	0	-32.2433	-1234.72
	48	420.569	3.56774	424.137		1.71149	1.85625			48	303.94		-16.6615	-812.442		2068	-30.732	-1214.38	0.219221	-13.2981	1.79364e-08	13.3251	0	1.79364e-08	-0.841274	-21.513		-0.318825	-0.522449	-0.862483	-31.0738	0	-0.00718385	-0.855299	0	0	0	0	-32.2165	-1266.94
	49	428.94	3.5095	432.45		1.66858	1.84092			49	308.472		-16.6177	-829.06		2069	-30.7102	-1245.09	0.216367	-13.0817	1.74566e-08	13.3251	0	1.74566e-08	-0.841274	-22.3542		-0.318825	-0.522449	-0.862291	-31.9361	0	-0.00699171	-0.855299	0	0	0	0	-32.1974	-1299.13
	50	250.406	117.514	367.92	8.22192	107.466	1.82594			50	312.994		-16.5804	-845.64		2070	-30.6944	-1275.78	0.213536	-12.8682	1.69943e-08	13.3251	0	1.69943e-08	-0.841274	-23.1955		-0.318825	-0.522449	-0.862105	-32.7982	0	-0.00680655	-0.855299	0	0	0	0	-32.1842	-1331.32
	51	235.471	107.841	343.312		98.6261	9.21454			51	317.507		-16.5483	-862.189		2071	654.627	-621.154	-418.017	-430.885	158.643	171.968	158.643	1.69943e-08	-45.4301	-68.6256	-44.5888	-0.318825	-0.522449	-23.1934	-55.9916	-22.2718	-0.00680655	-0.855299	0	-0.0594749	-336.622	-336.622	-9.9919	-1341.31
	52	223.192	104.754	327.947		91.5144	13.2401			52	321.752		-15.5635	-877.752		2072	54.7601	-566.394	35.4692	-395.416	0.195766	172.164	0	0.195766	-0.841274	-69.4669		-0.318825	-0.522449	-2.21013	-58.2017		-1.29535	-0.855299	0	-0.0594749	0	-336.622	87.3737	-1253.94
	53	213.194	102.116	315.311		85.7258	16.3903			53	325.986		-15.5257	-893.278		2073	45.0223	-521.372	11.316	-384.1	0.138427	172.302	0	0.138427	-0.841274	-70.3081		-0.318825	-0.522449	-1.96728	-60.169		-1.0525	-0.855299	0	-0.0594749	0	-336.622	53.6681	-1200.27
	54	205.188	99.8243	305.012		80.9551	18.8692			54	330.211		-15.4932	-908.771		2074	36.6589	-484.713	9.67397	-374.426	0.097883	172.4	0	0.097883	-0.841274	-71.1494		-0.318825	-0.522449	-1.77953	-61.9485		-0.864758	-0.855299	0	-0.0594749	0	-336.622	43.8099	-1156.46
	55	198.944	97.8011	296.745		76.9713	20.8298			55	334.429		-15.4652	-924.236		2075	29.3588	-455.354	8.40341	-366.022	0.069214	172.469	0	0.069214	-0.841274	-71.9907		-0.318825	-0.522449	-1.63374	-63.5822		-0.718961	-0.855299	0	-0.0594749	0	-336.622	35.3565	-1121.1
	56	194.283	95.9867	290.27		73.5991	22.3876			56	338.64		-15.441	-939.677		2076	22.8921	-432.462	7.41837	-358.604	0.0489419	172.518	0	0.0489419	-0.841274	-72.832		-0.318825	-0.522449	-1.51998	-65.1022		-0.60521	-0.855299	0	-0.0594749	0	-336.622	27.9982	-1093.1
	57	191.057	94.3353	285.392		70.7051	23.6301			57	342.529		-14.2596	-953.937		2077	17.0904	-415.372	6.65266	-351.951	0.0346074	172.553	0	0.0346074	-0.841274	-73.6732		-0.318825	-0.522449	-1.43079	-66.533		-0.516016	-0.855299	0	-0.0594749	0	-336.622	21.5057	-1071.6
	58	189.141	92.8114	281.952		68.1873	24.6241			58	346.407		-14.2193	-968.156		2078	11.8309	-403.541	6.05542	-345.896	0.0244713	172.577	0	0.0244713	-0.841274	-74.5145		-0.318825	-0.522449	-1.36048	-67.8935		-0.445704	-0.855299	0	-0.0594749	0	-336.622	15.7091	-1055.89
	59	188.431	91.388	279.819		65.9673	25.4208			59	350.276		-14.1847	-982.341		2079	7.02363	-396.517	5.58754	-340.308	0.017304	172.594	0	0.017304	-0.841274	-75.3558		-0.318825	-0.522449	-1.30473	-69.1982		-0.389954	-0.855299	0	-0.0594749	0	-336.622	10.4825	-1045.41
	60	188.835	90.0444	278.88		63.9849	26.0595			60	354.136		-14.1547	-996.496		2080	2.60238	-393.915	5.219	-335.089	0.012236	172.607	0	0.012236	-0.841274	-76.1971		-0.318825	-0.522449	-1.26025	-70.4585		-0.345474	-0.855299	0	-0.0594749	0	-336.622	5.7321	-1039.67
	61	190.272	88.7644	279.036		62.1935	26.5709			61	358.007		-14.1943	-1010.69		2081	-1.48191	-395.397	4.92676	-330.163	0.0086523	172.615	0	0.0086523	-0.841274	-77.0383		-0.318825	-0.522449	-1.22451	-71.683		-0.309739	-0.855299	0	-0.0594749	0	-336.622	1.38771	-1038.29
	62	192.666	87.5359	280.202		60.5572	26.9787			62	361.578		-13.0916	-1023.78		2082	-5.26639	-400.663	4.69314	-325.469	0.00611825	172.621	0	0.00611825	-0.841274	-77.8796		-0.318825	-0.522449	-1.19559	-72.8786		-0.280814	-0.855299	0	-0.0594749	0	-336.622	-2.60399	-1040.89
	63	195.951	86.3493	282.3		59.0477	27.3016			63	365.139		-13.0578	-1036.84		2083	-8.77949	-409.443	4.50457	-320.965	0.00432641	172.626	0	0.00432641	-0.841274	-78.7209		-0.318825	-0.522449	-1.17198	-74.0506		-0.257209	-0.855299	0	-0.0594749	0	-336.622	-6.28384	-1047.17
	64	200.063	85.1975	285.26		57.6432	27.5543			64	368.692		-13.0286	-1049.87		2084	-12.0439	-421.486	4.35064	-316.614	0.00305937	172.629	0	0.00305937	-0.841274	-79.5621		-0.318825	-0.522449	-1.15255	-75.2031		-0.237773	-0.855299	0	-0.0594749	0	-336.622	-9.68404	-1056.86
	65	204.944	84.0748	289.018		56.3264	27.7484			65	372.239		-13.0033	-1062.87		2085	-15.0777	-436.564	4.22335	-312.391	0.00137486	172.63	0	0.00137486	-0.407248	-79.9694		0.63765	-1.0449	-0.242712	-75.4458		-0.0499472	-0.192765	0	0	0	-336.622	-11.503	-1068.36
	66	210.537	82.977	293.514		55.0837	27.8932			66	375.779		-12.9809	-1075.85		2086	-17.8959	-454.46	4.11656	-308.274	0.000972256	172.631	0	0.000972256	-0.407248	-80.3766		0.63765	-1.0449	-0.239654	-75.6855		-0.0468889	-0.192765	0	0	0	-336.622	-14.4253	-1082.79
	67	216.792	81.9006	298.692		53.9045	27.996			67	378.979		-11.733	-1087.59		2087	-20.5107	-474.971	4.02554	-304.249	0.000687568	172.632	0	0.000687568	-0.407248	-80.7839		0.63765	-1.0449	-0.237057	-75.9225		-0.0442926	-0.192765	0	0	0	-336.622	-17.1288	-1099.92
	68	223.656	80.8432	304.499		52.7802	28.0629			68	382.167		-11.6891	-1099.27		2088	-22.9322	-497.903	3.94668	-300.302	0.000486259	172.632	0	0.000486259	-0.407248	-81.1911		0.63765	-1.0449	-0.234829	-76.1574		-0.042064	-0.192765	0	0	0	-336.622	-19.6271	-1119.54
	69	231.081	79.8027	310.884		51.704	28.0988			69	385.344		-11.6509	-1110.93		2089	-25.1684	-523.071	3.87718	-296.425	0.00034391	172.633	0	0.00034391	-0.407248	-81.5984		0.63765	-1.0449	-0.232894	-76.3903		-0.0401291	-0.192765	0	0	0	-336.622	-21.931	-1141.47
	70	239.02	78.7778	317.797		50.6703	28.1075			70	388.513		-11.6174	-1122.54		2090	-27.2256	-550.297	3.8149	-292.61	0.000243252	172.633	0	0.000243252	-0.407248	-82.0056		0.63765	-1.0449	-0.231195	-76.6214		-0.0384303	-0.192765	0	0	0	-336.622	-24.0489	-1165.52
	71	231.313	89.8941	321.207	4.95963	56.8177	28.1167			71	391.673		-11.5877	-1134.13		2091	-29.1086	-579.405	3.75818	-288.852	0.000172074	172.633	0	0.000172074	-0.407248	-82.4129		0.63765	-1.0449	-0.229687	-76.8511		-0.036922	-0.192765	0	0	0	-336.622	-25.9872	-1191.51
	72	237.694	83.5438	321.238		54.793	28.7508			72	394.647		-10.9046	-1145.03		2092	28.2574	-551.148	-40.7597	-329.612	5.89236	178.525	5.89176	0.000600351	-16.36	-98.7729	-15.9528	0.63765	-1.0449	-0.853094	-77.7042	-0.880131	0.219802	-0.192765	0	0	0	-336.622	-23.823	-1215.33
	73	244.775	82.256	327.031		53.0851	29.1708			73	397.611		-10.8671	-1155.9		2093	-23.3968	-574.545	23.2842	-306.327	8.64165e-05	178.526	0	8.64165e-05	-0.407248	-99.1801		0.63765	-1.0449	-0.265133	-77.9694		-0.0723685	-0.192765	0	0	0	-336.622	-0.784882	-1216.12
	74	252.449	81.0441	333.493		51.6087	29.4354			74	400.565		-10.8334	-1166.74		2094	-25.9644	-600.509	4.72222	-301.605	6.11752e-05	178.526	0	6.11752e-05	-0.407248	-99.5874		0.63765	-1.0449	-0.253813	-78.2232		-0.0610481	-0.192765	0	0	0	-336.622	-21.9032	-1238.02
	75	261.038	79.8894	340.928		50.303	29.5864			75	403.511		-10.8033	-1177.54		2095	-28.1377	-628.647	4.44339	-297.162	4.3325e-05	178.526	0	4.3325e-05	-0.407248	-99.9946		0.63765	-1.0449	-0.245542	-78.4687		-0.0527767	-0.192765	0	0	0	-336.622	-24.3471	-1262.37
	76	269.304	78.7785	348.082		49.1249	29.6536			76	406.45		-10.776	-1188.31		2096	-31.493	-660.14	4.23386	-292.928	3.07013e-05	178.526	0	3.07013e-05	-0.407248	-100.402		0.63765	-1.0449	-0.239438	-78.7082		-0.0466735	-0.192765	0	0	0	-336.622	-27.9058	-1290.27
	77	277.737	77.7018	355.439		48.0436	29.6582			77	408.192		-6.38738	-1194.7		2097	-30.3066	-690.446	4.07344	-288.855	2.17732e-05	178.526	0	2.17732e-05	-0.407248	-100.809		0.63765	-1.0449	-0.234879	-78.943		-0.0421142	-0.192765	0	0	0	-336.622	-26.8753	-1317.15
	78	286.315	76.6527	362.967		47.0369	29.6157			78	409.898		-6.2551	-1200.96		2098	-30.9215	-721.368	3.94783	-284.907	1.54585e-05	178.526	0	1.54585e-05	-0.407248	-101.216		0.63765	-1.0449	-0.231421	-79.1745		-0.0386563	-0.192765	0	0	0	-336.622	-27.6123	-1344.76
	79	295.019	75.6263	370.645		46.0892	29.5371			79	411.573		-6.13887	-1207.1		2099	-31.4525	-752.821	3.84689	-281.06	1.09917e-05	178.526	0	1.09917e-05	-0.407248	-101.624		0.63765	-1.0449	-0.228751	-79.4032		-0.0359863	-0.192765	0	0	0	-336.622	-28.2416	-1373
	80	304.096	74.6192	378.715		45.189	29.4303			80	413.219		-6.03548	-1213.13		2100	-31.9141	-784.735	3.76347	-277.296	7.83171e-06	178.526	0	7.83171e-06	-0.407248	-102.031		0.63765	-1.0449	-0.226646	-79.6298		-0.0338814	-0.192765	0	0	0	-336.622	-28.7845	-1401.79
	81	313.27	73.6291	386.9		44.328	29.3012			81	414.839		-5.94241	-1219.07		2101	-33.2832	-818.018	3.69248	-273.604	5.59576e-06	178.526	0	5.59576e-06	-0.407248	-102.438		0.63765	-1.0449	-0.224948	-79.8548		-0.0321837	-0.192765	0	0	0	-336.622	-30.223	-1432.01
	82	322.531	72.6543	395.185		43.5002	29.1541			82	416.17		-4.88069	-1223.95		2102	-33.6402	-851.658	3.63034	-269.974	4.01329e-06	178.526	0	4.01329e-06	-0.407248	-102.845		0.63765	-1.0449	-0.223546	-80.0783		-0.0307811	-0.192765	0	0	0	-336.622	-30.6407	-1462.65
	83	331.867	71.6934	403.56		42.7012	28.9922			83	417.475		-4.78507	-1228.74		2103	-33.9547	-885.613	3.57451	-266.399	2.89294e-06	178.526	0	2.89294e-06	-0.407248	-103.253		0.63765	-1.0449	-0.222358	-80.3007		-0.0295936	-0.192765	0	0	0	-336.622	-31.0098	-1493.66
	84	341.271	70.7457	412.016		41.9277	28.8179			84	418.757		-4.69816	-1233.44		2104	-34.2328	-919.846	3.52318	-262.876	2.09939e-06	178.526	0	2.09939e-06	-0.407248	-103.66		0.63765	-1.0449	-0.221329	-80.522		-0.0285645	-0.192765	0	0	0	-336.622	-31.3382	-1525
	85	350.356	69.8104	420.166		41.1772	28.6332			85	420.016		-4.61831	-1238.06		2105	-34.4797	-954.325	3.47509	-259.401	1.53698e-06	178.526	0	1.53698e-06	-0.407248	-104.067		0.63765	-1.0449	-0.220418	-80.7424		-0.0276532	-0.192765	0	0	0	-336.622	-31.6323	-1556.63
	86	359.492	68.8871	428.379		40.4478	28.4393			86	421.256		-4.54422	-1242.6		2106	-33.3127	-987.638	3.42934	-255.971	1.13804e-06	178.526	0	1.13804e-06	-0.407248	-104.474		0.63765	-1.0449	-0.219596	-80.962		-0.0268309	-0.192765	0	0	0	-336.622	-30.5102	-1587.14
	87	368.674	67.9755	436.649		39.738	28.2375			87	422.476		-4.47498	-1247.08		2107	-33.4991	-1021.14	3.38529	-252.586	8.54733e-07	178.526	0	8.54733e-07	-0.407248	-104.882		0.63765	-1.0449	-0.218842	-81.1809		-0.0260768	-0.192765	0	0	0	-336.622	-30.7399	-1617.88
	88	377.897	67.0753	444.973		39.0466	28.0287			88	423.679		-4.40976	-1251.48		2108	-33.6674	-1054.8	3.34251	-249.244	6.53225e-07	178.526	0	6.53225e-07	-0.407248	-105.289		0.63765	-1.0449	-0.218141	-81.399		-0.025376	-0.192765	0	0	0	-336.622	-30.9503	-1648.83
	89	387.158	66.1864	453.345		38.3727	27.8137			89	424.864		-4.34804	-1255.83		2109	-33.8194	-1088.62	3.30068	-245.943	5.09592e-07	178.526	0	5.09592e-07	-0.407248	-105.696		0.63765	-1.0449	-0.217483	-81.6165		-0.0247178	-0.192765	0	0	0	-336.622	-31.1434	-1679.98
	90	395.722	65.3084	461.03		37.7154	27.5931			90	426.034		-4.28925	-1260.12		2110	-33.9572	-1122.58	3.25959	-242.683	4.06915e-07	178.526	0	4.06915e-07	-0.407248	-106.103		0.63765	-1.0449	-0.216859	-81.8334		-0.0240944	-0.192765	0	0	0	-336.622	-31.3217	-1711.3
	91	404.309	64.4414	468.75		37.074	27.3675			91	427.189		-4.23307	-1264.36		2111	-31.3998	-1153.98	3.21907	-239.464	3.33232e-07	178.526	0	3.33232e-07	-0.407248	-106.511		0.63765	-1.0449	-0.216265	-82.0496		-0.0235001	-0.192765	0	0	0	-336.622	-28.8042	-1740.1
	92	412.918	63.5852	476.504		36.4479	27.1373			92	428.329		-4.1791	-1268.53		2112	-31.4856	-1185.47	3.17904	-236.285	2.8008e-07	178.526	0	2.8008e-07	-0.407248	-106.918		0.63765	-1.0449	-0.215696	-82.2653		-0.0229308	-0.192765	0	0	0	-336.622	-28.9295	-1769.03
	93	421.549	62.7397	484.289		35.8366	26.9032			93	429.454		-4.12711	-1272.66		2113	-31.5679	-1217.03	3.13941	-233.146	2.41475e-07	178.526	0	2.41475e-07	-0.407248	-107.325		0.63765	-1.0449	-0.215148	-82.4805		-0.0223832	-0.192765	0	0	0	-336.622	-29.0509	-1798.08
	94	430.2	61.9048	492.105		35.2395	26.6653			94	430.566		-4.07697	-1276.74		2114	-31.646	-1248.68	3.10014	-230.046	2.13186e-07	178.526	0	2.13186e-07	-0.407248	-107.732		0.63765	-1.0449	-0.21462	-82.6951		-0.0218552	-0.192765	0	0	0	-336.622	-29.1677	-1827.25
	95	438.097	61.0805	499.178		34.6563	26.4242			95	431.665		-4.02836	-1280.77		2115	-31.7194	-1280.4	3.06121	-226.984	1.92218e-07	178.526	0	1.92218e-07	-0.407248	-108.14		0.63765	-1.0449	-0.21411	-82.9092		-0.0213448	-0.192765	0	0	0	-336.622	-29.2796	-1856.53
	96	446.003	60.2666	506.269		34.0865	26.1801			96	432.75		-3.98124	-1284.75		2116	-28.957	-1309.36	3.02258	-223.962	1.76453e-07	178.526	0	1.76453e-07	-0.407248	-108.547		0.63765	-1.0449	-0.213615	-83.1228		-0.0208507	-0.192765	0	0	0	-336.622	-26.5553	-1883.08
	97	453.917	59.4631	513.38		33.5297	25.9334			97	433.824		-3.93546	-1288.68		2117	-28.9865	-1338.34	2.98425	-220.978	1.64394e-07	178.526	0	1.64394e-07	-0.407248	-108.954		0.63765	-1.0449	-0.213136	-83.336		-0.0203717	-0.192765	0	0	0	-336.622	-26.6227	-1909.71
	98	461.841	58.6699	520.511		32.9855	25.6844			98	434.885		-3.89085	-1292.57		2118	-29.0196	-1367.36	2.94622	-218.031	1.54979e-07	178.526	0	1.54979e-07	-0.407248	-109.361		0.63765	-1.0449	-0.212672	-83.5486		-0.019907	-0.192765	0	0	0	-336.622	-26.6933	-1936.4
	99	469.775	57.8869	527.662		32.4535	25.4334			99	435.934		-3.84742	-1296.42		2119	-29.0548	-1396.42	2.90848	-215.123	1.47459e-07	178.526	0	1.47459e-07	-0.407248	-109.769		0.63765	-1.0449	-0.212221	-83.7609		-0.0194559	-0.192765	0	0	0	-336.622	-26.7658	-1963.17
	100	288.179	177.741	465.92	10.907	139.448	27.3859			100	436.972		-3.80506	-1300.23		2120	-29.091	-1425.51	2.87103	-212.252	1.41302e-07	178.526		1.41302e-07	-0.407248	-110.176		0.63765	-1.0449	-0.211782	-83.9726		-0.0190176	-0.192765	0	0	0	-336.622	-26.839	-1990
																Further Ambition targets scenario
																	2nd planting (Mg CO2 eq)																							Plantation (Core)
																Year	Terrestrial C storage		HWP C storage		Forestry/ wood processing emissions (total)		Forestry/ primary wood processing emissions	Secondary wood processing emissions	(BE)CCS (total)		(BE)CCS (primary)	(BE)CCS (secondary)	(BE)CCS (tertiary)	FF offset (total)		Primary electricity offset (biomass + incineration)	Secondary electricity offset (biomass + incineration)	Tertiary electricity offset (biomass + incineration)	Heat offset (biomass)	Heat offset (incineration)	Concrete offset (net)		Net - annual flux	Net - cumulative C sequestration
																	Annual flux	Accumulation	Annual flux	Accumulation	Annual flux	Accumulation			Annual flux	Accumulation				Annual flux	Accumulation						Annual flux	Accumulation
																2020
																2021	0	0	0	0	5.00358	5.00358	5.00358	0	0	0	0	0	0	0	0	0	0	0	0	0	0	0	5.00358	5.00358
																2022	0.599623	0.599623	0	0	0	5.00358	0	0	0	0	0	0	0	0	0	0	0	0	0	0	0	0	0.599623	5.6032
																2023	-0.507923	0.0917007	0	0	0	5.00358	0	0	0	0	0	0	0	0	0	0	0	0	0	0	0	0	-0.507923	5.09528
																2024	-1.92493	-1.83323	0	0	0	5.00358	0	0	0	0	0	0	0	0	0	0	0	0	0	0	0	0	-1.92493	3.17035
																2025	-3.55635	-5.38958	0	0	0	5.00358	0	0	0	0	0	0	0	0	0	0	0	0	0	0	0	0	-3.55635	-0.386001
																2026	-5.35193	-10.7415	0	0	0	5.00358	0	0	0	0	0	0	0	0	0	0	0	0	0	0	0	0	-5.35193	-5.73793
																2027	-7.27359	-18.0151	0	0	0	5.00358	0	0	0	0	0	0	0	0	0	0	0	0	0	0	0	0	-7.27359	-13.0115
																2028	-9.28859	-27.3037	0	0	0	5.00358	0	0	0	0	0	0	0	0	0	0	0	0	0	0	0	0	-9.28859	-22.3001
																2029	-11.3672	-38.6709	0	0	0	5.00358	0	0	0	0	0	0	0	0	0	0	0	0	0	0	0	0	-11.3672	-33.6673
																2030	-13.4824	-52.1533	0	0	0	5.00358	0	0	0	0	0	0	0	0	0	0	0	0	0	0	0	0	-13.4824	-47.1497
																2031	-15.6095	-67.7629	0	0	0	5.00358	0	0	0	0	0	0	0	0	0	0	0	0	0	0	0	0	-15.6095	-62.7593
																2032	-17.7267	-85.4896	0	0	0	5.00358	0	0	0	0	0	0	0	0	0	0	0	0	0	0	0	0	-17.7267	-80.486
																2033	-19.8148	-105.304	0	0	0	5.00358	0	0	0	0	0	0	0	0	0	0	0	0	0	0	0	0	-19.8148	-100.301
																2034	-21.8574	-127.162	0	0	0	5.00358	0	0	0	0	0	0	0	0	0	0	0	0	0	0	0	0	-21.8574	-122.158
																2035	-23.8412	-151.003	0	0	0	5.00358	0	0	0	0	0	0	0	0	0	0	0	0	0	0	0	0	-23.8412	-145.999
																2036	-25.7549	-176.758	0	0	0	5.00358	0	0	0	0	0	0	0	0	0	0	0	0	0	0	0	0	-25.7549	-171.754
																2037	-27.5896	-204.347	0	0	0	5.00358	0	0	0	0	0	0	0	0	0	0	0	0	0	0	0	0	-27.5896	-199.344
																2038	-29.338	-233.685	0	0	0	5.00358	0	0	0	0	0	0	0	0	0	0	0	0	0	0	0	0	-29.338	-228.682
																2039	-30.9935	-264.679	0	0	0	5.00358	0	0	0	0	0	0	0	0	0	0	0	0	0	0	0	0	-30.9935	-259.675
																2040	-32.5507	-297.23	0	0	0	5.00358	0	0	0	0	0	0	0	0	0	0	0	0	0	0	0	0	-32.5507	-292.226
																2041	-34.0044	-331.234	0	0	0	5.00358	0	0	0	0	0	0	0	0	0	0	0	0	0	0	0	0	-34.0044	-326.23
																2042	17.6073	-313.627	-24.8113	-24.8113	5.09947	10.103	5.09947	0	-15.866	-15.866	-14.1835	-0.63765	-1.0449	-0.782518	-0.782518	-0.782518	0	0	0	0	0	0	-18.7531	-344.983
																2043	-28.3006	-341.927	2.80517	-22.0061	2.38021e-07	10.103	0	2.38021e-07	-1.68255	-17.5486		-0.63765	-1.0449	-0.226574	-1.00909	0	-0.033809	-0.192765	0	0	0	0	-27.4045	-372.388
																2044	-30.5355	-372.463	0.986722	-21.0194	1.74186e-07	10.103	0	1.74186e-07	-1.68255	-19.2311		-0.63765	-1.0449	-0.217506	-1.2266	0	-0.0247417	-0.192765	0	0	0	0	-31.4488	-403.837
																2045	-32.4275	-404.89	0.778555	-20.2408	1.28892e-07	10.103	0	1.28892e-07	-1.68255	-20.9137		-0.63765	-1.0449	-0.211073	-1.43767	0	-0.0183081	-0.192765	0	0	0	0	-33.5425	-437.379
																2046	-34.0251	-438.915	0.630603	-19.6102	9.67131e-08	10.103	0	9.67131e-08	-1.68255	-22.5962		-0.63765	-1.0449	-0.206502	-1.64417	0	-0.0137373	-0.192765	0	0	0	0	-35.2836	-472.663
																2047	-36.8851	-475.8	0.52522	-19.085	7.38122e-08	10.103	0	7.38122e-08	-1.68255	-24.2788		-0.63765	-1.0449	-0.203249	-1.84742	0	-0.0104844	-0.192765	0	0	0	0	-38.2457	-510.909
																2048	-35.2691	-511.07	0.449927	-18.6351	5.74758e-08	10.103	0	5.74758e-08	-1.68255	-25.9613		-0.63765	-1.0449	-0.200929	-2.04835	0	-0.00816398	-0.192765	0	0	0	0	-36.7026	-547.611
																2049	-35.5086	-546.578	0.395902	-18.2392	4.57851e-08	10.103	0	4.57851e-08	-1.68255	-27.6438		-0.63765	-1.0449	-0.199268	-2.24762	0	-0.00650341	-0.192765	0	0	0	0	-36.9945	-584.606
																2050	-35.7094	-582.288	0.356909	-17.8823	1.59415e-08	10.103	0	1.59415e-08	-1.8695	-29.5133		-0.7085	-1.161	0	-2.24762	0	0	0	0	0	0	0	-37.222	-621.828
																2051	-35.8788	-618.166	0.328537	-17.5537	1.33519e-08	10.103	0	1.33519e-08	-1.8695	-31.3828		-0.7085	-1.161	0	-2.24762	0	0	0	0	0	0	0	-37.4197	-659.247
																2052	-36.9884	-655.155	0.30767	-17.2461	1.14662e-08	10.103	0	1.14662e-08	-1.8695	-33.2523		-0.7085	-1.161	0	-2.24762	0	0	0	0	0	0	0	-38.5502	-697.798
																2053	-37.1136	-692.268	0.292104	-16.954	1.00797e-08	10.103	0	1.00797e-08	-1.8695	-35.1218		-0.7085	-1.161	0	-2.24762	0	0	0	0	0	0	0	-38.691	-736.489
																2054	-37.2206	-729.489	0.280281	-16.6737	9.04763e-09	10.103	0	9.04763e-09	-1.8695	-36.9913		-0.7085	-1.161	0	-2.24762	0	0	0	0	0	0	0	-38.8098	-775.298
																2055	-37.312	-766.801	0.271101	-16.4026	8.2676e-09	10.103	0	8.2676e-09	-1.8695	-38.8608		-0.7085	-1.161	0	-2.24762	0	0	0	0	0	0	0	-38.9104	-814.209
																2056	-37.3905	-804.191	0.263788	-16.1388	7.66714e-09	10.103	0	7.66714e-09	-1.8695	-40.7303		-0.7085	-1.161	0	-2.24762	0	0	0	0	0	0	0	-38.9962	-853.205
																2057	-36.0712	-840.263	0.257791	-15.881	7.19499e-09	10.103	0	7.19499e-09	-1.8695	-42.5998		-0.7085	-1.161	0	-2.24762	0	0	0	0	0	0	0	-37.6829	-890.888
																2058	-36.1194	-876.382	0.252723	-15.6283	6.81486e-09	10.103	0	6.81486e-09	-1.8695	-44.4693		-0.7085	-1.161	0	-2.24762	0	0	0	0	0	0	0	-37.7362	-928.624
																2059	-36.1622	-912.544	0.24831	-15.38	6.50104e-09	10.103	0	6.50104e-09	-1.8695	-46.3388		-0.7085	-1.161	0	-2.24762	0	0	0	0	0	0	0	-37.7834	-966.407
																2060	-36.1997	-948.744	0.244361	-15.1356	6.23535e-09	10.103	0	6.23535e-09	-1.8695	-48.2083		-0.7085	-1.161	0	-2.24762	0	0	0	0	0	0	0	-37.8248	-1004.23
																2061	-36.2329	-984.977	0.240738	-14.8949	6.00485e-09	10.103	0	6.00485e-09	-1.8695	-50.0778		-0.7085	-1.161	0	-2.24762	0	0	0	0	0	0	0	-37.8616	-1042.09
																2062	-33.5798	-1018.56	0.237346	-14.6575	5.8004e-09	10.103	0	5.8004e-09	-1.8695	-51.9473		-0.7085	-1.161	0	-2.24762	0	0	0	0	0	0	0	-35.212	-1077.31
																2063	-33.5776	-1052.13	0.234119	-14.4234	5.61548e-09	10.103	0	5.61548e-09	-1.8695	-53.8168		-0.7085	-1.161	0	-2.24762	0	0	0	0	0	0	0	-35.213	-1112.52
																2064	-33.5792	-1085.71	0.231009	-14.1924	5.44546e-09	10.103	0	5.44546e-09	-1.8695	-55.6863		-0.7085	-1.161	0	-2.24762	0	0	0	0	0	0	0	-35.2177	-1147.74
																2065	-33.5828	-1119.3	0.227984	-13.9644	5.28704e-09	10.103	0	5.28704e-09	-1.8695	-57.5558		-0.7085	-1.161	0	-2.24762	0	0	0	0	0	0	0	-35.2243	-1182.96
																2066	-33.5875	-1152.88	0.22502	-13.7394	5.13784e-09	10.103	0	5.13784e-09	-1.8695	-59.4253		-0.7085	-1.161	0	-2.24762	0	0	0	0	0	0	0	-35.232	-1218.19
																2067	-30.7614	-1183.65	0.222103	-13.5173	4.99615e-09	10.103	0	4.99615e-09	-1.8695	-61.2948		-0.7085	-1.161	0	-2.24762	0	0	0	0	0	0	0	-32.4088	-1250.6
																2068	-30.732	-1214.38	0.219221	-13.2981	4.86076e-09	10.103	0	4.86076e-09	-1.8695	-63.1643		-0.7085	-1.161	0	-2.24762	0	0	0	0	0	0	0	-32.3822	-1282.98
																2069	-30.7102	-1245.09	0.216367	-13.0817	4.73075e-09	10.103	0	4.73075e-09	-1.8695	-65.0338		-0.7085	-1.161	0	-2.24762	0	0	0	0	0	0	0	-32.3634	-1315.35
																2070	-30.6944	-1275.78	0.213536	-12.8682	4.60547e-09	10.103	0	4.60547e-09	-1.8695	-66.9033		-0.7085	-1.161	0	-2.24762	0	0	0	0	0	0	0	-32.3503	-1347.7
																2071	654.627	-621.154	-418.017	-430.885	42.9922	53.0952	42.9922	4.60547e-09	-100.956	-167.859	-99.0862	-0.7085	-1.161	-0.00260599	-2.25022	0	0	0	0	-0.00260599	-149.102	-149.102	29.5421	-1318.16
																2072	54.7601	-566.394	35.4692	-395.416	0.0530527	53.1483	0	0.0530527	-1.8695	-169.728		-0.7085	-1.161	-0.00260599	-2.25283		0	0	0	-0.00260599	0	-149.102	88.4103	-1229.75
																2073	45.0223	-521.372	11.316	-384.1	0.0375137	53.1858	0	0.0375137	-1.8695	-171.598		-0.7085	-1.161	-0.00260599	-2.25544		0	0	0	-0.00260599	0	-149.102	54.5036	-1175.24
																2074	36.6589	-484.713	9.67397	-374.426	0.0265263	53.2123	0	0.0265263	-1.8695	-173.467		-0.7085	-1.161	-0.00260599	-2.25804		0	0	0	-0.00260599	0	-149.102	44.4873	-1130.75
																2075	29.3588	-455.354	8.40341	-366.022	0.018757	53.2311	0	0.018757	-1.8695	-175.337		-0.7085	-1.161	-0.00260599	-2.26065		0	0	0	-0.00260599	0	-149.102	35.9089	-1094.85
																2076	22.8921	-432.462	7.41837	-358.604	0.0132633	53.2443	0	0.0132633	-1.8695	-177.206		-0.7085	-1.161	-0.00260599	-2.26325		0	0	0	-0.00260599	0	-149.102	28.4516	-1066.39
																2077	17.0904	-415.372	6.65266	-351.951	0.0093786	53.2537	0	0.0093786	-1.8695	-179.076		-0.7085	-1.161	-0.00260599	-2.26586		0	0	0	-0.00260599	0	-149.102	21.8804	-1044.51
																2078	11.8309	-403.541	6.05542	-345.896	0.00663173	53.2603	0	0.00663173	-1.8695	-180.945		-0.7085	-1.161	-0.00260599	-2.26847		0	0	0	-0.00260599	0	-149.102	16.0209	-1028.49
																2079	7.02363	-396.517	5.58754	-340.308	0.00468939	53.265	0	0.00468939	-1.8695	-182.815		-0.7085	-1.161	-0.00260599	-2.27107		0	0	0	-0.00260599	0	-149.102	10.7438	-1017.75
																2080	2.60238	-393.915	5.219	-335.089	0.00331595	53.2684	0	0.00331595	-1.8695	-184.684		-0.7085	-1.161	-0.00260599	-2.27368		0	0	0	-0.00260599	0	-149.102	5.95259	-1011.8
																2081	-1.48191	-395.397	4.92676	-330.163	0.00234477	53.2707	0	0.00234477	-1.8695	-186.554		-0.7085	-1.161	-0.00260599	-2.27628		0	0	0	-0.00260599	0	-149.102	1.57509	-1010.22
																2082	-5.26639	-400.663	4.69314	-325.469	0.00165805	53.2724	0	0.00165805	-1.8695	-188.423		-0.7085	-1.161	-0.00260599	-2.27889		0	0	0	-0.00260599	0	-149.102	-2.44369	-1012.66
																2083	-8.77949	-409.443	4.50457	-320.965	0.00117246	53.2735	0	0.00117246	-1.8695	-190.293		-0.7085	-1.161	-0.00260599	-2.2815		0	0	0	-0.00260599	0	-149.102	-6.14584	-1018.81
																2084	-12.0439	-421.486	4.35064	-316.614	0.000829089	53.2744	0	0.000829089	-1.8695	-192.162		-0.7085	-1.161	-0.00260599	-2.2841		0	0	0	-0.00260599	0	-149.102	-9.56455	-1028.38
																2085	-15.0777	-436.564	4.22335	-312.391	0.000411053	53.2748	0	0.000411053	-1.8695	-194.032		-0.7085	-1.161	0	-2.2841		0	0	0	0	0	-149.102	-12.7235	-1041.1
																2086	-17.8959	-454.46	4.11656	-308.274	0.000290682	53.2751	0	0.000290682	-1.8695	-195.901		-0.7085	-1.161	0	-2.2841		0	0	0	0	0	-149.102	-15.6486	-1056.75
																2087	-20.5107	-474.971	4.02554	-304.249	0.000205567	53.2753	0	0.000205567	-1.8695	-197.771		-0.7085	-1.161	0	-2.2841		0	0	0	0	0	-149.102	-18.3545	-1075.1
																2088	-22.9322	-497.903	3.94668	-300.302	0.00014538	53.2754	0	0.00014538	-1.8695	-199.64		-0.7085	-1.161	0	-2.2841		0	0	0	0	0	-149.102	-20.8548	-1095.96
																2089	-25.1684	-523.071	3.87718	-296.425	0.000102821	53.2755	0	0.000102821	-1.8695	-201.51		-0.7085	-1.161	0	-2.2841		0	0	0	0	0	-149.102	-23.1606	-1119.12
																2090	-27.2256	-550.297	3.8149	-292.61	7.27268e-05	53.2756	0	7.27268e-05	-1.8695	-203.379		-0.7085	-1.161	0	-2.2841		0	0	0	0	0	-149.102	-25.2801	-1144.4
																2091	-29.1086	-579.405	3.75818	-288.852	5.14462e-05	53.2756	0	5.14462e-05	-1.8695	-205.249		-0.7085	-1.161	0	-2.2841		0	0	0	0	0	-149.102	-27.2198	-1171.62
																2092	28.2574	-551.148	-40.7597	-329.612	1.76168	55.0373	1.7615	0.000179491	-19.5948	-224.844	-17.7253	-0.7085	-1.161	0	-2.2841	0	0	0	0	0	0	-149.102	-30.3354	-1201.95
																2093	-23.3968	-574.545	23.2842	-306.327	2.58365e-05	55.0373	0	2.58365e-05	-1.8695	-226.713		-0.7085	-1.161	0	-2.2841		0	0	0	0	0	-149.102	-1.98206	-1203.93
																2094	-25.9644	-600.509	4.72222	-301.605	1.829e-05	55.0374	0	1.829e-05	-1.8695	-228.583		-0.7085	-1.161	0	-2.2841		0	0	0	0	0	-149.102	-23.1116	-1227.05
																2095	-28.1377	-628.647	4.44339	-297.162	1.29532e-05	55.0374	0	1.29532e-05	-1.8695	-230.452		-0.7085	-1.161	0	-2.2841		0	0	0	0	0	-149.102	-25.5638	-1252.61
																2096	-31.493	-660.14	4.23386	-292.928	9.17898e-06	55.0374	0	9.17898e-06	-1.8695	-232.322		-0.7085	-1.161	0	-2.2841		0	0	0	0	0	-149.102	-29.1286	-1281.74
																2097	-30.3066	-690.446	4.07344	-288.855	6.5097e-06	55.0374	0	6.5097e-06	-1.8695	-234.191		-0.7085	-1.161	0	-2.2841		0	0	0	0	0	-149.102	-28.1026	-1309.84
																2098	-30.9215	-721.368	3.94783	-284.907	4.62174e-06	55.0374	0	4.62174e-06	-1.8695	-236.061		-0.7085	-1.161	0	-2.2841		0	0	0	0	0	-149.102	-28.8432	-1338.68
																2099	-31.4525	-752.821	3.84689	-281.06	3.28627e-06	55.0374	0	3.28627e-06	-1.8695	-237.93		-0.7085	-1.161	0	-2.2841		0	0	0	0	0	-149.102	-29.4751	-1368.16
																2100	-31.9141	-784.735	3.76347	-277.296	2.3415e-06	55.0374	0	2.3415e-06	-1.8695	-239.8		-0.7085	-1.161	0	-2.2841		0	0	0	0	0	-149.102	-30.0201	-1398.18
																2101	-33.2832	-818.018	3.69248	-273.604	1.67301e-06	55.0374	0	1.67301e-06	-1.8695	-241.669		-0.7085	-1.161	0	-2.2841		0	0	0	0	0	-149.102	-31.4603	-1429.64
																2102	-33.6402	-851.658	3.63034	-269.974	1.19988e-06	55.0374	0	1.19988e-06	-1.8695	-243.539		-0.7085	-1.161	0	-2.2841		0	0	0	0	0	-149.102	-31.8794	-1461.52
																2103	-33.9547	-885.613	3.57451	-266.399	8.64922e-07	55.0374	0	8.64922e-07	-1.8695	-245.408		-0.7085	-1.161	0	-2.2841		0	0	0	0	0	-149.102	-32.2497	-1493.77
																2104	-34.2328	-919.846	3.52318	-262.876	6.2767e-07	55.0374	0	6.2767e-07	-1.8695	-247.278		-0.7085	-1.161	0	-2.2841		0	0	0	0	0	-149.102	-32.5791	-1526.35
																2105	-34.4797	-954.325	3.47509	-259.401	4.59522e-07	55.0374	0	4.59522e-07	-1.8695	-249.147		-0.7085	-1.161	0	-2.2841		0	0	0	0	0	-149.102	-32.8741	-1559.22
																2106	-33.3127	-987.638	3.42934	-255.971	3.40248e-07	55.0374	0	3.40248e-07	-1.8695	-251.017		-0.7085	-1.161	0	-2.2841		0	0	0	0	0	-149.102	-31.7528	-1590.98
																2107	-33.4991	-1021.14	3.38529	-252.586	2.55546e-07	55.0374	0	2.55546e-07	-1.8695	-252.886		-0.7085	-1.161	0	-2.2841		0	0	0	0	0	-149.102	-31.9833	-1622.96
																2108	-33.6674	-1054.8	3.34251	-249.244	1.95299e-07	55.0374	0	1.95299e-07	-1.8695	-254.756		-0.7085	-1.161	0	-2.2841		0	0	0	0	0	-149.102	-32.1944	-1655.15
																2109	-33.8194	-1088.62	3.30068	-245.943	1.52356e-07	55.0374	0	1.52356e-07	-1.8695	-256.625		-0.7085	-1.161	0	-2.2841		0	0	0	0	0	-149.102	-32.3882	-1687.54
																2110	-33.9572	-1122.58	3.25959	-242.683	1.21658e-07	55.0374	0	1.21658e-07	-1.8695	-258.495		-0.7085	-1.161	0	-2.2841		0	0	0	0	0	-149.102	-32.5671	-1720.11
																2111	-31.3998	-1153.98	3.21907	-239.464	9.96288e-08	55.0374	0	9.96288e-08	-1.8695	-260.364		-0.7085	-1.161	0	-2.2841		0	0	0	0	0	-149.102	-30.0502	-1750.16
																2112	-31.4856	-1185.47	3.17904	-236.285	8.37375e-08	55.0374	0	8.37375e-08	-1.8695	-262.234		-0.7085	-1.161	0	-2.2841		0	0	0	0	0	-149.102	-30.1761	-1780.33
																2113	-31.5679	-1217.03	3.13941	-233.146	7.21956e-08	55.0374	0	7.21956e-08	-1.8695	-264.103		-0.7085	-1.161	0	-2.2841		0	0	0	0	0	-149.102	-30.298	-1810.63
																2114	-31.646	-1248.68	3.10014	-230.046	6.37377e-08	55.0374	0	6.37377e-08	-1.8695	-265.973		-0.7085	-1.161	0	-2.2841		0	0	0	0	0	-149.102	-30.4154	-1841.05
																2115	-31.7194	-1280.4	3.06121	-226.984	5.74687e-08	55.0374	0	5.74687e-08	-1.8695	-267.842		-0.7085	-1.161	0	-2.2841		0	0	0	0	0	-149.102	-30.5277	-1871.58
																2116	-28.957	-1309.36	3.02258	-223.962	5.27554e-08	55.0374	0	5.27554e-08	-1.8695	-269.712		-0.7085	-1.161	0	-2.2841		0	0	0	0	0	-149.102	-27.8039	-1899.38
																2117	-28.9865	-1338.34	2.98425	-220.978	4.915e-08	55.0374	0	4.915e-08	-1.8695	-271.581		-0.7085	-1.161	0	-2.2841		0	0	0	0	0	-149.102	-27.8718	-1927.25
																2118	-29.0196	-1367.36	2.94622	-218.031	4.63353e-08	55.0374	0	4.63353e-08	-1.8695	-273.451		-0.7085	-1.161	0	-2.2841		0	0	0	0	0	-149.102	-27.9429	-1955.19
																2119	-29.0548	-1396.42	2.90848	-215.123	4.4087e-08	55.0374	0	4.4087e-08	-1.8695	-275.32		-0.7085	-1.161	0	-2.2841		0	0	0	0	0	-149.102	-28.0159	-1983.21
																2120	-29.091	-1425.51	2.87103	-212.252	4.22462e-08	55.0374		4.22462e-08	-1.8695	-277.19		-0.7085	-1.161	0	-2.2841		0	0	0	0	0	-149.102	-28.0894	-2011.3

## Sheet: Yr3
																Summary of emissions discounts to apply (to 2020 assumptions):
																	2020-2029		2030-2039		2040-2049		2050-2084		2085-2120
																	Core	FA	Core	FA	Core	FA	Core	FA	Core	FA
																Avoided emissions - Biomass (heat) - marginal supply	none	none	none	none	none	0.25258	0.9	0.039435	0	0
																Avoided emissions - Biomass (electricity) - marginal supply	none	none	0.9127	0.5635	0.8254	0.127	0.5635	0	0.127	0
																Avoided emissions - Incineration (electricity) - marginal supply	none	none	0.9127	0.5635	0.8254	0.127	0.5635	0	0.127	0
																Incineration (heat) - marginal supply	none	none	none	none	none	0	0.9	0.136905	0	0
																C storage - BECCS (biomass electricity)	none	none	0.09	0.45	0.18	0.9	0.45	1	0.9	1
																C storage - BECCS (biomass heat)	none	none	0	0	0	0.405	0	0.81	0.405	0.9
																Avoided emissions - Cement production - CCS application (calcination)	n/a	n/a	n/a	n/a	n/a	n/a	none	0.45568	0.93952	0.3952
																Avoided emissions - Cement production - furnace emissions reduction	n/a	n/a	n/a	n/a	n/a	n/a	0.9784	0.95104	0.95104	0.712
																Emissions - Wood panel (particle board) production (CCS on heat production)	none	none	none	none	none	0.6355	none	0.271	0.6355	0.19
																Emissions - Harvester/forwarder	none	none	none	none	none	0.55	0.87	0.1	0	0
	Annual C stock - total ecosystem (tonnes C) - >75% thin									Natural Forest' C sequestration
	Time Step	Total Ecosystem(GH model (thinned) average soil v3 Default Simu			Thinned	Thinned	Thinned				'Total Ecosystem(Afforestation (conservation) Default Simulation					Core targets scenario
		Forest ecosystem	HWP total	Net system C	Mulch/S C storage	HWP primary	HWP secondary				Net ecosystem C	Process emissions	Annual C flux	Net cumulative C sequestration and storage			3rd planting (Mg CO2 eq)																							Plantation (Core)
	Year	Tonnes C	Tonnes C		Tonnes C					Year	Tonnes C		Mg CO2eq			Year	Terrestrial C storage		HWP C storage		Forestry/ wood processing emissions (total)		Forestry/ primary wood processing emissions	Secondary wood processing emissions	(BE)CCS (total)		(BE)CCS (primary)	(BE)CCS (secondary)	(BE)CCS (tertiary)	FF offset (total)		Primary electricity offset (biomass + incineration)	Secondary electricity offset (biomass + incineration)	Tertiary electricity offset (biomass + incineration)	Heat offset (biomass)	Heat offset (incineration)	Concrete offset (net)		Net - annual flux	Net - cumulative C sequestration
																	Annual flux	Accumulation	Annual flux	Accumulation	Annual flux	Accumulation			Annual flux	Accumulation				Annual flux	Accumulation						Annual flux	Accumulation
	0	81	0	81	0	0	0			0						2020
	1	80.8365	0	80.8365		0	0			1						2021
	2	80.975	0	80.975		0	0			2	81	1.36461	5.00358	5.00358		2022	0	0	0	0	5.00358	5.00358	5.00358	0	0	0	0	0	0	0	0	0	0	0	0	0	0	0	5.00358	5.00358
	3	81.5	0	81.5		0	0			3	80.8429		0.575894	5.57947		2023	0.599623	0.599623	0	0	0	5.00358	0	0	0	0	0	0	0	0	0	0	0	0	0	0	0	0	0.599623	5.6032
	4	82.4699	0	82.4699		0	0			4	80.9424		-0.36473	5.21474		2024	-0.507923	0.0917007	0	0	0	5.00358	0	0	0	0	0	0	0	0	0	0	0	0	0	0	0	0	-0.507923	5.09528
	5	83.9295	0	83.9295		0	0			5	81.3393		-1.45544	3.7593		2025	-1.92493	-1.83323	0	0	0	5.00358	0	0	0	0	0	0	0	0	0	0	0	0	0	0	0	0	-1.92493	3.17035
	6	85.9132	0	85.9132		0	0			6	82.0617		-2.64872	1.11058		2026	-3.55635	-5.38958	0	0	0	5.00358	0	0	0	0	0	0	0	0	0	0	0	0	0	0	0	0	-3.55635	-0.386001
	7	88.4465	0	88.4465		0	0			7	83.1297		-3.91591	-2.80532		2027	-5.35193	-10.7415	0	0	0	5.00358	0	0	0	0	0	0	0	0	0	0	0	0	0	0	0	0	-5.35193	-5.73793
	8	91.5466	0	91.5466		0	0			8	84.5573		-5.23457	-8.03989		2028	-7.27359	-18.0151	0	0	0	5.00358	0	0	0	0	0	0	0	0	0	0	0	0	0	0	0	0	-7.27359	-13.0115
	9	95.2236	0	95.2236		0	0			9	86.3534		-6.58557	-14.6255		2029	-9.28859	-27.3037	0	0	0	5.00358	0	0	0	0	0	0	0	0	0	0	0	0	0	0	0	0	-9.28859	-22.3001
	10	99.4808	0	99.4808		0	0			10	88.5221		-7.95205	-22.5775		2030	-11.3672	-38.6709	0	0	0	5.00358	0	0	0	0	0	0	0	0	0	0	0	0	0	0	0	0	-11.3672	-33.6673
	11	104.315	0	104.315		0	0			11	91.0637		-9.31896	-31.8965		2031	-13.4824	-52.1533	0	0	0	5.00358	0	0	0	0	0	0	0	0	0	0	0	0	0	0	0	0	-13.4824	-47.1497
	12	109.719	0	109.719		0	0			12	93.9745		-10.673	-42.5695		2032	-15.6095	-67.7629	0	0	0	5.00358	0	0	0	0	0	0	0	0	0	0	0	0	0	0	0	0	-15.6095	-62.7593
	13	115.68	0	115.68		0	0			13	97.2478		-12.0023	-54.5718		2033	-17.7267	-85.4896	0	0	0	5.00358	0	0	0	0	0	0	0	0	0	0	0	0	0	0	0	0	-17.7267	-80.486
	14	122.183	0	122.183		0	0			14	100.874		-13.2969	-67.8687		2034	-19.8148	-105.304	0	0	0	5.00358	0	0	0	0	0	0	0	0	0	0	0	0	0	0	0	0	-19.8148	-100.301
	15	129.207	0	129.207		0	0			15	104.842		-14.548	-82.4167		2035	-21.8574	-127.162	0	0	0	5.00358	0	0	0	0	0	0	0	0	0	0	0	0	0	0	0	0	-21.8574	-122.158
	16	136.731	0	136.731		0	0			16	109.137		-15.7483	-98.165		2036	-23.8412	-151.003	0	0	0	5.00358	0	0	0	0	0	0	0	0	0	0	0	0	0	0	0	0	-23.8412	-145.999
	17	144.732	0	144.732		0	0			17	113.744		-16.8918	-115.057		2037	-25.7549	-176.758	0	0	0	5.00358	0	0	0	0	0	0	0	0	0	0	0	0	0	0	0	0	-25.7549	-171.754
	18	153.185	0	153.185		0	0			18	118.646		-17.9733	-133.03		2038	-27.5896	-204.347	0	0	0	5.00358	0	0	0	0	0	0	0	0	0	0	0	0	0	0	0	0	-27.5896	-199.344
	19	162.063	0	162.063		0	0			19	123.824		-18.9887	-152.019		2039	-29.338	-233.685	0	0	0	5.00358	0	0	0	0	0	0	0	0	0	0	0	0	0	0	0	0	-29.338	-228.682
	20	171.337	0	171.337		0	0			20	129.261		-19.9347	-171.953		2040	-30.9935	-264.679	0	0	0	5.00358	0	0	0	0	0	0	0	0	0	0	0	0	0	0	0	0	-30.9935	-259.675
	21	166.535	6.76672	173.301	0.415937	6.35078	0			21	134.936		-20.8082	-192.762		2041	-32.5507	-297.23	0	0	0	5.00358	0	0	0	0	0	0	0	0	0	0	0	0	0	0	0	0	-32.5507	-292.226
	22	174.253	6.00167	180.255		5.40511	0.596564			22	138.961		-14.7598	-207.521		2042	-34.0044	-331.234	0	0	0	5.00358	0	0	0	0	0	0	0	0	0	0	0	0	0	0	0	0	-34.0044	-326.23
	23	182.581	5.73256	188.313		4.71306	1.01951			23	143.702		-17.382	-224.903		2043	17.6073	-313.627	-24.8113	-24.8113	8.32153	13.3251	8.32153	0	-3.1732	-3.1732	-2.83669	-0.12753	-0.20898	-5.08575	-5.08575	-5.08575	0	0	0	0	0	0	-7.14141	-333.372
	24	191.425	5.52023	196.945		4.20096	1.31927			24	148.506		-17.6139	-242.517		2044	-28.3006	-341.927	2.80517	-22.0061	3.74541e-07	13.3251	0	3.74541e-07	-0.33651	-3.50971		-0.12753	-0.20898	-1.47255	-6.5583	0	-0.219732	-1.25282	0	0	0	0	-27.3045	-360.676
	25	200.704	5.34825	206.052		3.81671	1.53154			25	153.352		-17.7693	-260.287		2045	-30.5355	-372.463	0.986722	-21.0194	2.74092e-07	13.3251	0	2.74092e-07	-0.33651	-3.84622		-0.12753	-0.20898	-1.41362	-7.97192	0	-0.160801	-1.25282	0	0	0	0	-31.2989	-391.975
	26	210.764	5.20501	215.969		3.52345	1.68155			26	159.692		-23.2471	-283.534		2046	-32.4275	-404.89	0.778555	-20.2408	2.0282e-07	13.3251	0	2.0282e-07	-0.33651	-4.18273		-0.12753	-0.20898	-1.37181	-9.34373	0	-0.118988	-1.25282	0	0	0	0	-33.3572	-425.332
	27	220.383	5.0823	225.465		3.2951	1.7872			27	165.832		-22.5139	-306.048		2047	-34.0251	-438.915	0.630603	-19.6102	1.52184e-07	13.3251	0	1.52184e-07	-0.33651	-4.51924		-0.12753	-0.20898	-1.3421	-10.6858	0	-0.0892818	-1.25282	0	0	0	0	-35.0731	-460.406
	28	230.067	4.97433	235.041		3.11319	1.86114			28	175.455		-35.2823	-341.33		2048	-36.8851	-475.8	0.52522	-19.085	1.16148e-07	13.3251	0	1.16148e-07	-0.33651	-4.85575		-0.12753	-0.20898	-1.32096	-12.0068	0	-0.0681406	-1.25282	0	0	0	0	-38.0174	-498.423
	29	239.806	4.87699	244.683		2.96466	1.91232			29	184.967		-34.8791	-376.209		2049	-35.2691	-511.07	0.449927	-18.6351	9.04419e-08	13.3251	0	9.04419e-08	-0.33651	-5.19226		-0.12753	-0.20898	-1.30588	-13.3127	0	-0.0530594	-1.25282	0	0	0	0	-36.4615	-534.884
	30	249.591	4.78739	254.378		2.84026	1.94712			30	194.39		-34.5515	-410.761		2050	-35.5086	-546.578	0.395902	-18.2392	7.20458e-08	13.3251	0	7.20458e-08	-0.841274	-6.03353		-0.318825	-0.522449	-0.884154	-14.1968	0	-0.0288557	-0.855299	0	0	0	0	-36.8381	-571.723
	31	259.679	4.70348	264.382		2.73343	1.97004			31	203.739		-34.2804	-445.041		2051	-35.7094	-582.288	0.356909	-17.8823	5.88248e-08	13.3251	0	5.88248e-08	-0.841274	-6.87481		-0.318825	-0.522449	-0.878859	-15.0757	0	-0.0235604	-0.855299	0	0	0	0	-37.0726	-608.795
	32	269.8	4.62381	274.424		2.63952	1.98429			32	213.027		-34.0532	-479.094		2052	-35.8788	-618.166	0.328537	-17.5537	4.92691e-08	13.3251	0	4.92691e-08	-0.841274	-7.71608		-0.318825	-0.522449	-0.875032	-15.9507	0	-0.0197332	-0.855299	0	0	0	0	-37.2665	-646.062
	33	279.952	4.54737	284.499		2.55523	1.99214			33	219.105		-22.2888	-501.383		2053	-36.9884	-655.155	0.30767	-17.2461	4.23108e-08	13.3251	0	4.23108e-08	-0.841274	-8.55736		-0.318825	-0.522449	-0.872245	-16.823	0	-0.0169462	-0.855299	0	0	0	0	-38.3942	-684.456
	34	290.127	4.47343	294.601		2.4782	1.99523			34	225.133		-22.1014	-523.484		2054	-37.1136	-692.268	0.292104	-16.954	3.71945e-08	13.3251	0	3.71945e-08	-0.841274	-9.39863		-0.318825	-0.522449	-0.870196	-17.6932	0	-0.0148971	-0.855299	0	0	0	0	-38.533	-722.989
	35	300.325	4.40149	304.726		2.40676	1.99473			35	231.118		-21.9445	-545.429		2055	-37.2206	-729.489	0.280281	-16.6737	3.33861e-08	13.3251	0	3.33861e-08	-0.841274	-10.2399		-0.318825	-0.522449	-0.868671	-18.5618	0	-0.0133718	-0.855299	0	0	0	0	-38.6502	-761.639
	36	310.163	4.33118	314.494		2.33973	1.99146			36	237.067		-21.8117	-567.241		2056	-37.312	-766.801	0.271101	-16.4026	3.05077e-08	13.3251	0	3.05077e-08	-0.841274	-11.0812		-0.318825	-0.522449	-0.867518	-19.4293	0	-0.0122189	-0.855299	0	0	0	0	-38.7497	-800.389
	37	320.013	4.26226	324.276		2.27624	1.98602			37	242.985		-21.699	-588.94		2057	-37.3905	-804.191	0.263788	-16.1388	2.8292e-08	13.3251	0	2.8292e-08	-0.841274	-11.9225		-0.318825	-0.522449	-0.86663	-20.296	0	-0.0113315	-0.855299	0	0	0	0	-38.8346	-839.223
	38	329.876	4.19454	334.07		2.21567	1.97887			38	248.464		-20.0901	-609.03		2058	-36.0712	-840.263	0.257791	-15.881	2.65498e-08	13.3251	0	2.65498e-08	-0.841274	-12.7637		-0.318825	-0.522449	-0.865932	-21.1619	0	-0.0106337	-0.855299	0	0	0	0	-37.5206	-876.744
	39	339.748	4.1279	343.876		2.15757	1.97032			39	253.915		-19.989	-629.019		2059	-36.1194	-876.382	0.252723	-15.6283	2.51471e-08	13.3251	0	2.51471e-08	-0.841274	-13.605		-0.318825	-0.522449	-0.865371	-22.0273	0	-0.0100719	-0.855299	0	0	0	0	-37.5733	-914.317
	40	349.63	4.06224	353.692		2.10163	1.96061			40	259.343		-19.9032	-648.922		2060	-36.1622	-912.544	0.24831	-15.38	2.39891e-08	13.3251	0	2.39891e-08	-0.841274	-14.4463		-0.318825	-0.522449	-0.864907	-22.8922	0	-0.00960808	-0.855299	0	0	0	0	-37.62	-951.937
	41	358.788	3.99751	362.786		2.04758	1.94993			41	264.751		-19.8296	-668.752		2061	-36.1997	-948.744	0.244361	-15.1356	2.30087e-08	13.3251	0	2.30087e-08	-0.841274	-15.2875		-0.318825	-0.522449	-0.864514	-23.7567	0	-0.00921539	-0.855299	0	0	0	0	-37.6611	-989.598
	42	367.946	3.93366	371.879		1.99526	1.93839			42	270.142		-19.7665	-688.518		2062	-36.2329	-984.977	0.240738	-14.8949	2.21581e-08	13.3251	0	2.21581e-08	-0.841274	-16.1288		-0.318825	-0.522449	-0.864174	-24.6209	0	-0.00887474	-0.855299	0	0	0	0	-37.6976	-1027.3
	43	377.104	3.87066	380.974		1.94453	1.92613			43	275.112		-18.2224	-706.74		2063	-33.5798	-1018.56	0.237346	-14.6575	2.14037e-08	13.3251	0	2.14037e-08	-0.841274	-16.9701		-0.318825	-0.522449	-0.863871	-25.4847	0	-0.00857257	-0.855299	0	0	0	0	-35.0476	-1062.34
	44	386.263	3.80848	390.071		1.89527	1.91321			44	280.063		-18.1553	-724.896		2064	-33.5776	-1052.13	0.234119	-14.4234	2.07213e-08	13.3251	0	2.07213e-08	-0.841274	-17.8114		-0.318825	-0.522449	-0.863598	-26.3483	0	-0.00829928	-0.855299	0	0	0	0	-35.0484	-1097.39
	45	395.423	3.74711	399.17		1.8474	1.89971			45	284.999		-18.0982	-742.994		2065	-33.5792	-1085.71	0.231009	-14.1924	2.0094e-08	13.3251	0	2.0094e-08	-0.841274	-18.6526		-0.318825	-0.522449	-0.863347	-27.2117	0	-0.00804801	-0.855299	0	0	0	0	-35.0529	-1132.44
	46	403.812	3.68654	407.499		1.80085	1.88568			46	289.924		-18.0569	-761.051		2066	-33.5828	-1119.3	0.227984	-13.9644	1.95094e-08	13.3251	0	1.95094e-08	-0.841274	-19.4939		-0.318825	-0.522449	-0.863113	-28.0748	0	-0.00781386	-0.855299	0	0	0	0	-35.0592	-1167.5
	47	412.194	3.62675	415.82		1.75557	1.87118			47	294.838		-18.0171	-779.068		2067	-33.5875	-1152.88	0.22502	-13.7394	1.89588e-08	13.3251	0	1.89588e-08	-0.841274	-20.3352		-0.318825	-0.522449	-0.862892	-28.9377	0	-0.00759335	-0.855299	0	0	0	0	-35.0667	-1202.57
	48	420.569	3.56774	424.137		1.71149	1.85625			48	299.396		-16.7129	-795.781		2068	-30.7614	-1183.65	0.222103	-13.5173	1.8436e-08	13.3251	0	1.8436e-08	-0.841274	-21.1765		-0.318825	-0.522449	-0.862683	-29.8004	0	-0.00738395	-0.855299	0	0	0	0	-32.2433	-1234.81
	49	428.94	3.5095	432.45		1.66858	1.84092			49	303.94		-16.6615	-812.442		2069	-30.732	-1214.38	0.219221	-13.2981	1.79364e-08	13.3251	0	1.79364e-08	-0.841274	-22.0177		-0.318825	-0.522449	-0.862483	-30.6629	0	-0.00718385	-0.855299	0	0	0	0	-32.2165	-1267.03
	50	250.406	117.514	367.92	8.22192	107.466	1.82594			50	308.472		-16.6177	-829.06		2070	-30.7102	-1245.09	0.216367	-13.0817	1.74566e-08	13.3251	0	1.74566e-08	-0.841274	-22.859		-0.318825	-0.522449	-0.862291	-31.5251	0	-0.00699171	-0.855299	0	0	0	0	-32.1974	-1299.23
	51	235.471	107.841	343.312		98.6261	9.21454			51	312.994		-16.5804	-845.64		2071	-30.6944	-1275.78	0.213536	-12.8682	1.69943e-08	13.3251	0	1.69943e-08	-0.841274	-23.7003		-0.318825	-0.522449	-0.862105	-32.3873	0	-0.00680655	-0.855299	0	0	0	0	-32.1842	-1331.41
	52	223.192	104.754	327.947		91.5144	13.2401			52	317.507		-16.5483	-862.189		2072	654.627	-621.154	-418.017	-430.885	158.643	171.968	158.643	1.69943e-08	-45.4301	-69.1304	-44.5888	-0.318825	-0.522449	-23.1934	-55.5806	-22.2718	-0.00680655	-0.855299	0	-0.0594749	-336.622	-336.622	-9.9919	-1341.4
	53	213.194	102.116	315.311		85.7258	16.3903			53	321.752		-15.5635	-877.752		2073	54.7601	-566.394	35.4692	-395.416	0.195766	172.164	0	0.195766	-0.841274	-69.9716		-0.318825	-0.522449	-2.21013	-57.7908		-1.29535	-0.855299	0	-0.0594749	0	-336.622	87.3737	-1254.03
	54	205.188	99.8243	305.012		80.9551	18.8692			54	325.986		-15.5257	-893.278		2074	45.0223	-521.372	11.316	-384.1	0.138427	172.302	0	0.138427	-0.841274	-70.8129		-0.318825	-0.522449	-1.96728	-59.758		-1.0525	-0.855299	0	-0.0594749	0	-336.622	53.6681	-1200.36
	55	198.944	97.8011	296.745		76.9713	20.8298			55	330.211		-15.4932	-908.771		2075	36.6589	-484.713	9.67397	-374.426	0.097883	172.4	0	0.097883	-0.841274	-71.6542		-0.318825	-0.522449	-1.77953	-61.5376		-0.864758	-0.855299	0	-0.0594749	0	-336.622	43.8099	-1156.55
	56	194.283	95.9867	290.27		73.5991	22.3876			56	334.429		-15.4652	-924.236		2076	29.3588	-455.354	8.40341	-366.022	0.069214	172.469	0	0.069214	-0.841274	-72.4954		-0.318825	-0.522449	-1.63374	-63.1713		-0.718961	-0.855299	0	-0.0594749	0	-336.622	35.3565	-1121.2
	57	191.057	94.3353	285.392		70.7051	23.6301			57	338.64		-15.441	-939.677		2077	22.8921	-432.462	7.41837	-358.604	0.0489419	172.518	0	0.0489419	-0.841274	-73.3367		-0.318825	-0.522449	-1.51998	-64.6913		-0.60521	-0.855299	0	-0.0594749	0	-336.622	27.9982	-1093.2
	58	189.141	92.8114	281.952		68.1873	24.6241			58	342.529		-14.2596	-953.937		2078	17.0904	-415.372	6.65266	-351.951	0.0346074	172.553	0	0.0346074	-0.841274	-74.178		-0.318825	-0.522449	-1.43079	-66.1221		-0.516016	-0.855299	0	-0.0594749	0	-336.622	21.5057	-1071.69
	59	188.431	91.388	279.819		65.9673	25.4208			59	346.407		-14.2193	-968.156		2079	11.8309	-403.541	6.05542	-345.896	0.0244713	172.577	0	0.0244713	-0.841274	-75.0193		-0.318825	-0.522449	-1.36048	-67.4826		-0.445704	-0.855299	0	-0.0594749	0	-336.622	15.7091	-1055.98
	60	188.835	90.0444	278.88		63.9849	26.0595			60	350.276		-14.1847	-982.341		2080	7.02363	-396.517	5.58754	-340.308	0.017304	172.594	0	0.017304	-0.841274	-75.8605		-0.318825	-0.522449	-1.30473	-68.7873		-0.389954	-0.855299	0	-0.0594749	0	-336.622	10.4825	-1045.5
	61	190.272	88.7644	279.036		62.1935	26.5709			61	354.136		-14.1547	-996.496		2081	2.60238	-393.915	5.219	-335.089	0.012236	172.607	0	0.012236	-0.841274	-76.7018		-0.318825	-0.522449	-1.26025	-70.0475		-0.345474	-0.855299	0	-0.0594749	0	-336.622	5.7321	-1039.77
	62	192.666	87.5359	280.202		60.5572	26.9787			62	358.007		-14.1943	-1010.69		2082	-1.48191	-395.397	4.92676	-330.163	0.0086523	172.615	0	0.0086523	-0.841274	-77.5431		-0.318825	-0.522449	-1.22451	-71.2721		-0.309739	-0.855299	0	-0.0594749	0	-336.622	1.38771	-1038.38
	63	195.951	86.3493	282.3		59.0477	27.3016			63	361.578		-13.0916	-1023.78		2083	-5.26639	-400.663	4.69314	-325.469	0.00611825	172.621	0	0.00611825	-0.841274	-78.3844		-0.318825	-0.522449	-1.19559	-72.4676		-0.280814	-0.855299	0	-0.0594749	0	-336.622	-2.60399	-1040.98
	64	200.063	85.1975	285.26		57.6432	27.5543			64	365.139		-13.0578	-1036.84		2084	-8.77949	-409.443	4.50457	-320.965	0.00432641	172.626	0	0.00432641	-0.841274	-79.2256		-0.318825	-0.522449	-1.17198	-73.6396		-0.257209	-0.855299	0	-0.0594749	0	-336.622	-6.28384	-1047.27
	65	204.944	84.0748	289.018		56.3264	27.7484			65	368.692		-13.0286	-1049.87		2085	-12.0439	-421.486	4.35064	-316.614	0.00194423	172.628	0	0.00194423	-1.68255	-80.9082		-0.63765	-1.0449	-0.246353	-73.886		-0.0535887	-0.192765	0	0	0	-336.622	-9.62024	-1056.89
	66	210.537	82.977	293.514		55.0837	27.8932			66	372.239		-13.0033	-1062.87		2086	-15.0777	-436.564	4.22335	-312.391	0.00137486	172.629	0	0.00137486	-1.68255	-82.5907		-0.63765	-1.0449	-0.242712	-74.1287		-0.0499472	-0.192765	0	0	0	-336.622	-12.7783	-1069.67
	67	216.792	81.9006	298.692		53.9045	27.996			67	375.779		-12.9809	-1075.85		2087	-17.8959	-454.46	4.11656	-308.274	0.000972256	172.63	0	0.000972256	-1.68255	-84.2733		-0.63765	-1.0449	-0.239654	-74.3683		-0.0468889	-0.192765	0	0	0	-336.622	-15.7006	-1085.37
	68	223.656	80.8432	304.499		52.7802	28.0629			68	378.979		-11.733	-1087.59		2088	-20.5107	-474.971	4.02554	-304.249	0.000687568	172.631	0	0.000687568	-1.68255	-85.9558		-0.63765	-1.0449	-0.237057	-74.6054		-0.0442926	-0.192765	0	0	0	-336.622	-18.4041	-1103.77
	69	231.081	79.8027	310.884		51.704	28.0988			69	382.167		-11.6891	-1099.27		2089	-22.9322	-497.903	3.94668	-300.302	0.000486259	172.631	0	0.000486259	-1.68255	-87.6384		-0.63765	-1.0449	-0.234829	-74.8402		-0.042064	-0.192765	0	0	0	-336.622	-20.9024	-1124.67
	70	239.02	78.7778	317.797		50.6703	28.1075			70	385.344		-11.6509	-1110.93		2090	-25.1684	-523.071	3.87718	-296.425	0.00034391	172.632	0	0.00034391	-1.68255	-89.3209		-0.63765	-1.0449	-0.232894	-75.0731		-0.0401291	-0.192765	0	0	0	-336.622	-23.2063	-1147.88
	71	231.313	89.8941	321.207	4.95963	56.8177	28.1167			71	388.513		-11.6174	-1122.54		2091	-27.2256	-550.297	3.8149	-292.61	0.000243252	172.632	0	0.000243252	-1.68255	-91.0035		-0.63765	-1.0449	-0.231195	-75.3043		-0.0384303	-0.192765	0	0	0	-336.622	-25.3242	-1173.2
	72	237.694	83.5438	321.238		54.793	28.7508			72	391.673		-11.5877	-1134.13		2092	-29.1086	-579.405	3.75818	-288.852	0.000172074	172.632	0	0.000172074	-1.68255	-92.686		-0.63765	-1.0449	-0.229687	-75.534		-0.036922	-0.192765	0	0	0	-336.622	-27.2625	-1200.47
	73	244.775	82.256	327.031		53.0851	29.1708			73	394.647		-10.9046	-1145.03		2093	28.2574	-551.148	-40.7597	-329.612	5.89236	178.524	5.89176	0.000600351	-17.6353	-110.321	-15.9528	-0.63765	-1.0449	-0.853094	-76.3871	-0.880131	0.219802	-0.192765	0	0	0	-336.622	-25.0983	-1225.57
	74	252.449	81.0441	333.493		51.6087	29.4354			74	397.611		-10.8671	-1155.9		2094	-23.3968	-574.545	23.2842	-306.327	8.64165e-05	178.524	0	8.64165e-05	-1.68255	-112.004		-0.63765	-1.0449	-0.265133	-76.6522		-0.0723685	-0.192765	0	0	0	-336.622	-2.06018	-1227.63
	75	261.038	79.8894	340.928		50.303	29.5864			75	400.565		-10.8334	-1166.74		2095	-25.9644	-600.509	4.72222	-301.605	6.11752e-05	178.524	0	6.11752e-05	-1.68255	-113.686		-0.63765	-1.0449	-0.253813	-76.906		-0.0610481	-0.192765	0	0	0	-336.622	-23.1785	-1250.8
	76	269.304	78.7785	348.082		49.1249	29.6536			76	403.511		-10.8033	-1177.54		2096	-28.1377	-628.647	4.44339	-297.162	4.3325e-05	178.525	0	4.3325e-05	-1.68255	-115.369		-0.63765	-1.0449	-0.245542	-77.1516		-0.0527767	-0.192765	0	0	0	-336.622	-25.6224	-1276.43
	77	277.737	77.7018	355.439		48.0436	29.6582			77	406.45		-10.776	-1188.31		2097	-31.493	-660.14	4.23386	-292.928	3.07013e-05	178.525	0	3.07013e-05	-1.68255	-117.052		-0.63765	-1.0449	-0.239438	-77.391		-0.0466735	-0.192765	0	0	0	-336.622	-29.1811	-1305.61
	78	286.315	76.6527	362.967		47.0369	29.6157			78	408.192		-6.38738	-1194.7		2098	-30.3066	-690.446	4.07344	-288.855	2.17732e-05	178.525	0	2.17732e-05	-1.68255	-118.734		-0.63765	-1.0449	-0.234879	-77.6259		-0.0421142	-0.192765	0	0	0	-336.622	-28.1506	-1333.76
	79	295.019	75.6263	370.645		46.0892	29.5371			79	409.898		-6.2551	-1200.96		2099	-30.9215	-721.368	3.94783	-284.907	1.54585e-05	178.525	0	1.54585e-05	-1.68255	-120.417		-0.63765	-1.0449	-0.231421	-77.8573		-0.0386563	-0.192765	0	0	0	-336.622	-28.8876	-1362.65
	80	304.096	74.6192	378.715		45.189	29.4303			80	411.573		-6.13887	-1207.1		2100	-31.4525	-752.821	3.84689	-281.06	1.09917e-05	178.525	0	1.09917e-05	-1.68255	-122.099		-0.63765	-1.0449	-0.228751	-78.0861		-0.0359863	-0.192765	0	0	0	-336.622	-29.5169	-1392.16
	81	313.27	73.6291	386.9		44.328	29.3012			81	413.219		-6.03548	-1213.13		2101	-31.9141	-784.735	3.76347	-277.296	7.83171e-06	178.525	0	7.83171e-06	-1.68255	-123.782		-0.63765	-1.0449	-0.226646	-78.3127		-0.0338814	-0.192765	0	0	0	-336.622	-30.0598	-1422.22
	82	322.531	72.6543	395.185		43.5002	29.1541			82	414.839		-5.94241	-1219.07		2102	-33.2832	-818.018	3.69248	-273.604	5.59576e-06	178.525	0	5.59576e-06	-1.68255	-125.464		-0.63765	-1.0449	-0.224948	-78.5377		-0.0321837	-0.192765	0	0	0	-336.622	-31.4983	-1453.72
	83	331.867	71.6934	403.56		42.7012	28.9922			83	416.17		-4.88069	-1223.95		2103	-33.6402	-851.658	3.63034	-269.974	4.01329e-06	178.525	0	4.01329e-06	-1.68255	-127.147		-0.63765	-1.0449	-0.223546	-78.7612		-0.0307811	-0.192765	0	0	0	-336.622	-31.916	-1485.64
	84	341.271	70.7457	412.016		41.9277	28.8179			84	417.475		-4.78507	-1228.74		2104	-33.9547	-885.613	3.57451	-266.399	2.89294e-06	178.525	0	2.89294e-06	-1.68255	-128.829		-0.63765	-1.0449	-0.222358	-78.9836		-0.0295936	-0.192765	0	0	0	-336.622	-32.2851	-1517.92
	85	350.356	69.8104	420.166		41.1772	28.6332			85	418.757		-4.69816	-1233.44		2105	-34.2328	-919.846	3.52318	-262.876	2.09939e-06	178.525	0	2.09939e-06	-1.68255	-130.512		-0.63765	-1.0449	-0.221329	-79.2049		-0.0285645	-0.192765	0	0	0	-336.622	-32.6135	-1550.54
	86	359.492	68.8871	428.379		40.4478	28.4393			86	420.016		-4.61831	-1238.06		2106	-34.4797	-954.325	3.47509	-259.401	1.53698e-06	178.525	0	1.53698e-06	-1.68255	-132.194		-0.63765	-1.0449	-0.220418	-79.4253		-0.0276532	-0.192765	0	0	0	-336.622	-32.9076	-1583.44
	87	368.674	67.9755	436.649		39.738	28.2375			87	421.256		-4.54422	-1242.6		2107	-33.3127	-987.638	3.42934	-255.971	1.13804e-06	178.525	0	1.13804e-06	-1.68255	-133.877		-0.63765	-1.0449	-0.219596	-79.6449		-0.0268309	-0.192765	0	0	0	-336.622	-31.7855	-1615.23
	88	377.897	67.0753	444.973		39.0466	28.0287			88	422.476		-4.47498	-1247.08		2108	-33.4991	-1021.14	3.38529	-252.586	8.54733e-07	178.525	0	8.54733e-07	-1.68255	-135.56		-0.63765	-1.0449	-0.218842	-79.8638		-0.0260768	-0.192765	0	0	0	-336.622	-32.0152	-1647.24
	89	387.158	66.1864	453.345		38.3727	27.8137			89	423.679		-4.40976	-1251.48		2109	-33.6674	-1054.8	3.34251	-249.244	6.53225e-07	178.525	0	6.53225e-07	-1.68255	-137.242		-0.63765	-1.0449	-0.218141	-80.0819		-0.025376	-0.192765	0	0	0	-336.622	-32.2256	-1679.47
	90	395.722	65.3084	461.03		37.7154	27.5931			90	424.864		-4.34804	-1255.83		2110	-33.8194	-1088.62	3.30068	-245.943	5.09592e-07	178.525	0	5.09592e-07	-1.68255	-138.925		-0.63765	-1.0449	-0.217483	-80.2994		-0.0247178	-0.192765	0	0	0	-336.622	-32.4187	-1711.89
	91	404.309	64.4414	468.75		37.074	27.3675			91	426.034		-4.28925	-1260.12		2111	-33.9572	-1122.58	3.25959	-242.683	4.06915e-07	178.525	0	4.06915e-07	-1.68255	-140.607		-0.63765	-1.0449	-0.216859	-80.5162		-0.0240944	-0.192765	0	0	0	-336.622	-32.597	-1744.48
	92	412.918	63.5852	476.504		36.4479	27.1373			92	427.189		-4.23307	-1264.36		2112	-31.3998	-1153.98	3.21907	-239.464	3.33232e-07	178.525	0	3.33232e-07	-1.68255	-142.29		-0.63765	-1.0449	-0.216265	-80.7325		-0.0235001	-0.192765	0	0	0	-336.622	-30.0795	-1774.56
	93	421.549	62.7397	484.289		35.8366	26.9032			93	428.329		-4.1791	-1268.53		2113	-31.4856	-1185.47	3.17904	-236.285	2.8008e-07	178.525	0	2.8008e-07	-1.68255	-143.972		-0.63765	-1.0449	-0.215696	-80.9482		-0.0229308	-0.192765	0	0	0	-336.622	-30.2048	-1804.77
	94	430.2	61.9048	492.105		35.2395	26.6653			94	429.454		-4.12711	-1272.66		2114	-31.5679	-1217.03	3.13941	-233.146	2.41475e-07	178.525	0	2.41475e-07	-1.68255	-145.655		-0.63765	-1.0449	-0.215148	-81.1634		-0.0223832	-0.192765	0	0	0	-336.622	-30.3262	-1835.1
	95	438.097	61.0805	499.178		34.6563	26.4242			95	430.566		-4.07697	-1276.74		2115	-31.646	-1248.68	3.10014	-230.046	2.13186e-07	178.525	0	2.13186e-07	-1.68255	-147.337		-0.63765	-1.0449	-0.21462	-81.378		-0.0218552	-0.192765	0	0	0	-336.622	-30.443	-1865.54
	96	446.003	60.2666	506.269		34.0865	26.1801			96	431.665		-4.02836	-1280.77		2116	-31.7194	-1280.4	3.06121	-226.984	1.92218e-07	178.525	0	1.92218e-07	-1.68255	-149.02		-0.63765	-1.0449	-0.21411	-81.5921		-0.0213448	-0.192765	0	0	0	-336.622	-30.5549	-1896.09
	97	453.917	59.4631	513.38		33.5297	25.9334			97	432.75		-3.98124	-1284.75		2117	-28.957	-1309.36	3.02258	-223.962	1.76453e-07	178.525	0	1.76453e-07	-1.68255	-150.702		-0.63765	-1.0449	-0.213615	-81.8057		-0.0208507	-0.192765	0	0	0	-336.622	-27.8306	-1923.92
	98	461.841	58.6699	520.511		32.9855	25.6844			98	433.824		-3.93546	-1288.68		2118	-28.9865	-1338.34	2.98425	-220.978	1.64394e-07	178.525	0	1.64394e-07	-1.68255	-152.385		-0.63765	-1.0449	-0.213136	-82.0188		-0.0203717	-0.192765	0	0	0	-336.622	-27.898	-1951.82
	99	469.775	57.8869	527.662		32.4535	25.4334			99	434.885		-3.89085	-1292.57		2119	-29.0196	-1367.36	2.94622	-218.031	1.54979e-07	178.525	0	1.54979e-07	-1.68255	-154.068		-0.63765	-1.0449	-0.212672	-82.2315		-0.019907	-0.192765	0	0	0	-336.622	-27.9686	-1979.79
	100	288.179	177.741	465.92	10.907	139.448	27.3859			100	435.934		-3.84742	-1296.42		2120	-29.0548	-1396.42	2.90848	-215.123	1.47459e-07	178.525	0	1.47459e-07	-1.68255	-155.75		-0.63765	-1.0449	-0.212221	-82.4437		-0.0194559	-0.192765	0	0	0	-336.622	-28.0411	-2007.83
																Further Ambition targets scenario
																	3rd planting (Mg CO2 eq)																							Plantation (Core)
																Year	Terrestrial C storage		HWP C storage		Forestry/ wood processing emissions (total)		Forestry/ primary wood processing emissions	Secondary wood processing emissions	(BE)CCS (total)		(BE)CCS (primary)	(BE)CCS (secondary)	(BE)CCS (tertiary)	FF offset (total)		Primary electricity offset (biomass + incineration)	Secondary electricity offset (biomass + incineration)	Tertiary electricity offset (biomass + incineration)	Heat offset (biomass)	Heat offset (incineration)	Concrete offset (net)		Net - annual flux	Net - cumulative C sequestration
																	Annual flux	Accumulation	Annual flux	Accumulation	Annual flux	Accumulation			Annual flux	Accumulation				Annual flux	Accumulation						Annual flux	Accumulation
																2020
																2021
																2022	0	0	0	0	5.00358	5.00358	5.00358	0	0	0	0	0	0	0	0	0	0	0	0	0	0	0	5.00358	5.00358
																2023	0.599623	0.599623	0	0	0	5.00358	0	0	0	0	0	0	0	0	0	0	0	0	0	0	0	0	0.599623	5.6032
																2024	-0.507923	0.0917007	0	0	0	5.00358	0	0	0	0	0	0	0	0	0	0	0	0	0	0	0	0	-0.507923	5.09528
																2025	-1.92493	-1.83323	0	0	0	5.00358	0	0	0	0	0	0	0	0	0	0	0	0	0	0	0	0	-1.92493	3.17035
																2026	-3.55635	-5.38958	0	0	0	5.00358	0	0	0	0	0	0	0	0	0	0	0	0	0	0	0	0	-3.55635	-0.386001
																2027	-5.35193	-10.7415	0	0	0	5.00358	0	0	0	0	0	0	0	0	0	0	0	0	0	0	0	0	-5.35193	-5.73793
																2028	-7.27359	-18.0151	0	0	0	5.00358	0	0	0	0	0	0	0	0	0	0	0	0	0	0	0	0	-7.27359	-13.0115
																2029	-9.28859	-27.3037	0	0	0	5.00358	0	0	0	0	0	0	0	0	0	0	0	0	0	0	0	0	-9.28859	-22.3001
																2030	-11.3672	-38.6709	0	0	0	5.00358	0	0	0	0	0	0	0	0	0	0	0	0	0	0	0	0	-11.3672	-33.6673
																2031	-13.4824	-52.1533	0	0	0	5.00358	0	0	0	0	0	0	0	0	0	0	0	0	0	0	0	0	-13.4824	-47.1497
																2032	-15.6095	-67.7629	0	0	0	5.00358	0	0	0	0	0	0	0	0	0	0	0	0	0	0	0	0	-15.6095	-62.7593
																2033	-17.7267	-85.4896	0	0	0	5.00358	0	0	0	0	0	0	0	0	0	0	0	0	0	0	0	0	-17.7267	-80.486
																2034	-19.8148	-105.304	0	0	0	5.00358	0	0	0	0	0	0	0	0	0	0	0	0	0	0	0	0	-19.8148	-100.301
																2035	-21.8574	-127.162	0	0	0	5.00358	0	0	0	0	0	0	0	0	0	0	0	0	0	0	0	0	-21.8574	-122.158
																2036	-23.8412	-151.003	0	0	0	5.00358	0	0	0	0	0	0	0	0	0	0	0	0	0	0	0	0	-23.8412	-145.999
																2037	-25.7549	-176.758	0	0	0	5.00358	0	0	0	0	0	0	0	0	0	0	0	0	0	0	0	0	-25.7549	-171.754
																2038	-27.5896	-204.347	0	0	0	5.00358	0	0	0	0	0	0	0	0	0	0	0	0	0	0	0	0	-27.5896	-199.344
																2039	-29.338	-233.685	0	0	0	5.00358	0	0	0	0	0	0	0	0	0	0	0	0	0	0	0	0	-29.338	-228.682
																2040	-30.9935	-264.679	0	0	0	5.00358	0	0	0	0	0	0	0	0	0	0	0	0	0	0	0	0	-30.9935	-259.675
																2041	-32.5507	-297.23	0	0	0	5.00358	0	0	0	0	0	0	0	0	0	0	0	0	0	0	0	0	-32.5507	-292.226
																2042	-34.0044	-331.234	0	0	0	5.00358	0	0	0	0	0	0	0	0	0	0	0	0	0	0	0	0	-34.0044	-326.23
																2043	17.6073	-313.627	-24.8113	-24.8113	5.09947	10.103	5.09947	0	-15.866	-15.866	-14.1835	-0.63765	-1.0449	-0.782518	-0.782518	-0.782518	0	0	0	0	0	0	-18.7531	-344.983
																2044	-28.3006	-341.927	2.80517	-22.0061	2.38021e-07	10.103	0	2.38021e-07	-1.68255	-17.5486		-0.63765	-1.0449	-0.226574	-1.00909	0	-0.033809	-0.192765	0	0	0	0	-27.4045	-372.388
																2045	-30.5355	-372.463	0.986722	-21.0194	1.74186e-07	10.103	0	1.74186e-07	-1.68255	-19.2311		-0.63765	-1.0449	-0.217506	-1.2266	0	-0.0247417	-0.192765	0	0	0	0	-31.4488	-403.837
																2046	-32.4275	-404.89	0.778555	-20.2408	1.28892e-07	10.103	0	1.28892e-07	-1.68255	-20.9137		-0.63765	-1.0449	-0.211073	-1.43767	0	-0.0183081	-0.192765	0	0	0	0	-33.5425	-437.379
																2047	-34.0251	-438.915	0.630603	-19.6102	9.67131e-08	10.103	0	9.67131e-08	-1.68255	-22.5962		-0.63765	-1.0449	-0.206502	-1.64417	0	-0.0137373	-0.192765	0	0	0	0	-35.2836	-472.663
																2048	-36.8851	-475.8	0.52522	-19.085	7.38122e-08	10.103	0	7.38122e-08	-1.68255	-24.2788		-0.63765	-1.0449	-0.203249	-1.84742	0	-0.0104844	-0.192765	0	0	0	0	-38.2457	-510.909
																2049	-35.2691	-511.07	0.449927	-18.6351	5.74758e-08	10.103	0	5.74758e-08	-1.68255	-25.9613		-0.63765	-1.0449	-0.200929	-2.04835	0	-0.00816398	-0.192765	0	0	0	0	-36.7026	-547.611
																2050	-35.5086	-546.578	0.395902	-18.2392	1.95244e-08	10.103	0	1.95244e-08	-1.8695	-27.8308		-0.7085	-1.161	0	-2.04835	0	0	0	0	0	0	0	-36.9822	-584.593
																2051	-35.7094	-582.288	0.356909	-17.8823	1.59415e-08	10.103	0	1.59415e-08	-1.8695	-29.7003		-0.7085	-1.161	0	-2.04835	0	0	0	0	0	0	0	-37.222	-621.815
																2052	-35.8788	-618.166	0.328537	-17.5537	1.33519e-08	10.103	0	1.33519e-08	-1.8695	-31.5698		-0.7085	-1.161	0	-2.04835	0	0	0	0	0	0	0	-37.4197	-659.235
																2053	-36.9884	-655.155	0.30767	-17.2461	1.14662e-08	10.103	0	1.14662e-08	-1.8695	-33.4393		-0.7085	-1.161	0	-2.04835	0	0	0	0	0	0	0	-38.5502	-697.785
																2054	-37.1136	-692.268	0.292104	-16.954	1.00797e-08	10.103	0	1.00797e-08	-1.8695	-35.3088		-0.7085	-1.161	0	-2.04835	0	0	0	0	0	0	0	-38.691	-736.476
																2055	-37.2206	-729.489	0.280281	-16.6737	9.04763e-09	10.103	0	9.04763e-09	-1.8695	-37.1783		-0.7085	-1.161	0	-2.04835	0	0	0	0	0	0	0	-38.8098	-775.286
																2056	-37.312	-766.801	0.271101	-16.4026	8.2676e-09	10.103	0	8.2676e-09	-1.8695	-39.0478		-0.7085	-1.161	0	-2.04835	0	0	0	0	0	0	0	-38.9104	-814.196
																2057	-37.3905	-804.191	0.263788	-16.1388	7.66714e-09	10.103	0	7.66714e-09	-1.8695	-40.9173		-0.7085	-1.161	0	-2.04835	0	0	0	0	0	0	0	-38.9962	-853.193
																2058	-36.0712	-840.263	0.257791	-15.881	7.19499e-09	10.103	0	7.19499e-09	-1.8695	-42.7868		-0.7085	-1.161	0	-2.04835	0	0	0	0	0	0	0	-37.6829	-890.876
																2059	-36.1194	-876.382	0.252723	-15.6283	6.81486e-09	10.103	0	6.81486e-09	-1.8695	-44.6563		-0.7085	-1.161	0	-2.04835	0	0	0	0	0	0	0	-37.7362	-928.612
																2060	-36.1622	-912.544	0.24831	-15.38	6.50104e-09	10.103	0	6.50104e-09	-1.8695	-46.5258		-0.7085	-1.161	0	-2.04835	0	0	0	0	0	0	0	-37.7834	-966.395
																2061	-36.1997	-948.744	0.244361	-15.1356	6.23535e-09	10.103	0	6.23535e-09	-1.8695	-48.3953		-0.7085	-1.161	0	-2.04835	0	0	0	0	0	0	0	-37.8248	-1004.22
																2062	-36.2329	-984.977	0.240738	-14.8949	6.00485e-09	10.103	0	6.00485e-09	-1.8695	-50.2648		-0.7085	-1.161	0	-2.04835	0	0	0	0	0	0	0	-37.8616	-1042.08
																2063	-33.5798	-1018.56	0.237346	-14.6575	5.8004e-09	10.103	0	5.8004e-09	-1.8695	-52.1343		-0.7085	-1.161	0	-2.04835	0	0	0	0	0	0	0	-35.212	-1077.29
																2064	-33.5776	-1052.13	0.234119	-14.4234	5.61548e-09	10.103	0	5.61548e-09	-1.8695	-54.0038		-0.7085	-1.161	0	-2.04835	0	0	0	0	0	0	0	-35.213	-1112.51
																2065	-33.5792	-1085.71	0.231009	-14.1924	5.44546e-09	10.103	0	5.44546e-09	-1.8695	-55.8733		-0.7085	-1.161	0	-2.04835	0	0	0	0	0	0	0	-35.2177	-1147.72
																2066	-33.5828	-1119.3	0.227984	-13.9644	5.28704e-09	10.103	0	5.28704e-09	-1.8695	-57.7428		-0.7085	-1.161	0	-2.04835	0	0	0	0	0	0	0	-35.2243	-1182.95
																2067	-33.5875	-1152.88	0.22502	-13.7394	5.13784e-09	10.103	0	5.13784e-09	-1.8695	-59.6123		-0.7085	-1.161	0	-2.04835	0	0	0	0	0	0	0	-35.232	-1218.18
																2068	-30.7614	-1183.65	0.222103	-13.5173	4.99615e-09	10.103	0	4.99615e-09	-1.8695	-61.4818		-0.7085	-1.161	0	-2.04835	0	0	0	0	0	0	0	-32.4088	-1250.59
																2069	-30.732	-1214.38	0.219221	-13.2981	4.86076e-09	10.103	0	4.86076e-09	-1.8695	-63.3512		-0.7085	-1.161	0	-2.04835	0	0	0	0	0	0	0	-32.3822	-1282.97
																2070	-30.7102	-1245.09	0.216367	-13.0817	4.73075e-09	10.103	0	4.73075e-09	-1.8695	-65.2207		-0.7085	-1.161	0	-2.04835	0	0	0	0	0	0	0	-32.3634	-1315.34
																2071	-30.6944	-1275.78	0.213536	-12.8682	4.60547e-09	10.103	0	4.60547e-09	-1.8695	-67.0902		-0.7085	-1.161	0	-2.04835	0	0	0	0	0	0	0	-32.3503	-1347.69
																2072	654.627	-621.154	-418.017	-430.885	42.9922	53.0952	42.9922	4.60547e-09	-100.956	-168.046	-99.0862	-0.7085	-1.161	-0.00260599	-2.05096	0	0	0	0	-0.00260599	-149.102	-149.102	29.5421	-1318.14
																2073	54.7601	-566.394	35.4692	-395.416	0.0530527	53.1483	0	0.0530527	-1.8695	-169.915		-0.7085	-1.161	-0.00260599	-2.05356		0	0	0	-0.00260599	0	-149.102	88.4103	-1229.73
																2074	45.0223	-521.372	11.316	-384.1	0.0375137	53.1858	0	0.0375137	-1.8695	-171.785		-0.7085	-1.161	-0.00260599	-2.05617		0	0	0	-0.00260599	0	-149.102	54.5036	-1175.23
																2075	36.6589	-484.713	9.67397	-374.426	0.0265263	53.2123	0	0.0265263	-1.8695	-173.654		-0.7085	-1.161	-0.00260599	-2.05877		0	0	0	-0.00260599	0	-149.102	44.4873	-1130.74
																2076	29.3588	-455.354	8.40341	-366.022	0.018757	53.2311	0	0.018757	-1.8695	-175.524		-0.7085	-1.161	-0.00260599	-2.06138		0	0	0	-0.00260599	0	-149.102	35.9089	-1094.83
																2077	22.8921	-432.462	7.41837	-358.604	0.0132633	53.2443	0	0.0132633	-1.8695	-177.393		-0.7085	-1.161	-0.00260599	-2.06399		0	0	0	-0.00260599	0	-149.102	28.4516	-1066.38
																2078	17.0904	-415.372	6.65266	-351.951	0.0093786	53.2537	0	0.0093786	-1.8695	-179.263		-0.7085	-1.161	-0.00260599	-2.06659		0	0	0	-0.00260599	0	-149.102	21.8804	-1044.5
																2079	11.8309	-403.541	6.05542	-345.896	0.00663173	53.2603	0	0.00663173	-1.8695	-181.132		-0.7085	-1.161	-0.00260599	-2.0692		0	0	0	-0.00260599	0	-149.102	16.0209	-1028.48
																2080	7.02363	-396.517	5.58754	-340.308	0.00468939	53.265	0	0.00468939	-1.8695	-183.002		-0.7085	-1.161	-0.00260599	-2.0718		0	0	0	-0.00260599	0	-149.102	10.7438	-1017.74
																2081	2.60238	-393.915	5.219	-335.089	0.00331595	53.2684	0	0.00331595	-1.8695	-184.871		-0.7085	-1.161	-0.00260599	-2.07441		0	0	0	-0.00260599	0	-149.102	5.95259	-1011.78
																2082	-1.48191	-395.397	4.92676	-330.163	0.00234477	53.2707	0	0.00234477	-1.8695	-186.741		-0.7085	-1.161	-0.00260599	-2.07702		0	0	0	-0.00260599	0	-149.102	1.57509	-1010.21
																2083	-5.26639	-400.663	4.69314	-325.469	0.00165805	53.2724	0	0.00165805	-1.8695	-188.61		-0.7085	-1.161	-0.00260599	-2.07962		0	0	0	-0.00260599	0	-149.102	-2.44369	-1012.65
																2084	-8.77949	-409.443	4.50457	-320.965	0.00117246	53.2735	0	0.00117246	-1.8695	-190.48		-0.7085	-1.161	-0.00260599	-2.08223		0	0	0	-0.00260599	0	-149.102	-6.14584	-1018.8
																2085	-12.0439	-421.486	4.35064	-316.614	0.00058128	53.2741	0	0.00058128	-1.8695	-192.349		-0.7085	-1.161	0	-2.08223		0	0	0	0	0	-149.102	-9.5622	-1028.36
																2086	-15.0777	-436.564	4.22335	-312.391	0.000411053	53.2745	0	0.000411053	-1.8695	-194.219		-0.7085	-1.161	0	-2.08223		0	0	0	0	0	-149.102	-12.7235	-1041.08
																2087	-17.8959	-454.46	4.11656	-308.274	0.000290682	53.2748	0	0.000290682	-1.8695	-196.088		-0.7085	-1.161	0	-2.08223		0	0	0	0	0	-149.102	-15.6486	-1056.73
																2088	-20.5107	-474.971	4.02554	-304.249	0.000205567	53.275	0	0.000205567	-1.8695	-197.958		-0.7085	-1.161	0	-2.08223		0	0	0	0	0	-149.102	-18.3545	-1075.09
																2089	-22.9322	-497.903	3.94668	-300.302	0.00014538	53.2752	0	0.00014538	-1.8695	-199.827		-0.7085	-1.161	0	-2.08223		0	0	0	0	0	-149.102	-20.8548	-1095.94
																2090	-25.1684	-523.071	3.87718	-296.425	0.000102821	53.2753	0	0.000102821	-1.8695	-201.697		-0.7085	-1.161	0	-2.08223		0	0	0	0	0	-149.102	-23.1606	-1119.1
																2091	-27.2256	-550.297	3.8149	-292.61	7.27268e-05	53.2753	0	7.27268e-05	-1.8695	-203.566		-0.7085	-1.161	0	-2.08223		0	0	0	0	0	-149.102	-25.2801	-1144.38
																2092	-29.1086	-579.405	3.75818	-288.852	5.14462e-05	53.2754	0	5.14462e-05	-1.8695	-205.436		-0.7085	-1.161	0	-2.08223		0	0	0	0	0	-149.102	-27.2198	-1171.6
																2093	28.2574	-551.148	-40.7597	-329.612	1.76168	55.0371	1.7615	0.000179491	-19.5948	-225.031	-17.7253	-0.7085	-1.161	0	-2.08223	0	0	0	0	0	0	-149.102	-30.3354	-1201.94
																2094	-23.3968	-574.545	23.2842	-306.327	2.58365e-05	55.0371	0	2.58365e-05	-1.8695	-226.9		-0.7085	-1.161	0	-2.08223		0	0	0	0	0	-149.102	-1.98206	-1203.92
																2095	-25.9644	-600.509	4.72222	-301.605	1.829e-05	55.0371	0	1.829e-05	-1.8695	-228.77		-0.7085	-1.161	0	-2.08223		0	0	0	0	0	-149.102	-23.1116	-1227.03
																2096	-28.1377	-628.647	4.44339	-297.162	1.29532e-05	55.0371	0	1.29532e-05	-1.8695	-230.639		-0.7085	-1.161	0	-2.08223		0	0	0	0	0	-149.102	-25.5638	-1252.6
																2097	-31.493	-660.14	4.23386	-292.928	9.17898e-06	55.0371	0	9.17898e-06	-1.8695	-232.509		-0.7085	-1.161	0	-2.08223		0	0	0	0	0	-149.102	-29.1286	-1281.72
																2098	-30.3066	-690.446	4.07344	-288.855	6.5097e-06	55.0371	0	6.5097e-06	-1.8695	-234.378		-0.7085	-1.161	0	-2.08223		0	0	0	0	0	-149.102	-28.1026	-1309.83
																2099	-30.9215	-721.368	3.94783	-284.907	4.62174e-06	55.0371	0	4.62174e-06	-1.8695	-236.248		-0.7085	-1.161	0	-2.08223		0	0	0	0	0	-149.102	-28.8432	-1338.67
																2100	-31.4525	-752.821	3.84689	-281.06	3.28627e-06	55.0371	0	3.28627e-06	-1.8695	-238.117		-0.7085	-1.161	0	-2.08223		0	0	0	0	0	-149.102	-29.4751	-1368.14
																2101	-31.9141	-784.735	3.76347	-277.296	2.3415e-06	55.0372	0	2.3415e-06	-1.8695	-239.987		-0.7085	-1.161	0	-2.08223		0	0	0	0	0	-149.102	-30.0201	-1398.16
																2102	-33.2832	-818.018	3.69248	-273.604	1.67301e-06	55.0372	0	1.67301e-06	-1.8695	-241.856		-0.7085	-1.161	0	-2.08223		0	0	0	0	0	-149.102	-31.4603	-1429.63
																2103	-33.6402	-851.658	3.63034	-269.974	1.19988e-06	55.0372	0	1.19988e-06	-1.8695	-243.726		-0.7085	-1.161	0	-2.08223		0	0	0	0	0	-149.102	-31.8794	-1461.5
																2104	-33.9547	-885.613	3.57451	-266.399	8.64922e-07	55.0372	0	8.64922e-07	-1.8695	-245.595		-0.7085	-1.161	0	-2.08223		0	0	0	0	0	-149.102	-32.2497	-1493.75
																2105	-34.2328	-919.846	3.52318	-262.876	6.2767e-07	55.0372	0	6.2767e-07	-1.8695	-247.465		-0.7085	-1.161	0	-2.08223		0	0	0	0	0	-149.102	-32.5791	-1526.33
																2106	-34.4797	-954.325	3.47509	-259.401	4.59522e-07	55.0372	0	4.59522e-07	-1.8695	-249.334		-0.7085	-1.161	0	-2.08223		0	0	0	0	0	-149.102	-32.8741	-1559.21
																2107	-33.3127	-987.638	3.42934	-255.971	3.40248e-07	55.0372	0	3.40248e-07	-1.8695	-251.204		-0.7085	-1.161	0	-2.08223		0	0	0	0	0	-149.102	-31.7528	-1590.96
																2108	-33.4991	-1021.14	3.38529	-252.586	2.55546e-07	55.0372	0	2.55546e-07	-1.8695	-253.073		-0.7085	-1.161	0	-2.08223		0	0	0	0	0	-149.102	-31.9833	-1622.94
																2109	-33.6674	-1054.8	3.34251	-249.244	1.95299e-07	55.0372	0	1.95299e-07	-1.8695	-254.943		-0.7085	-1.161	0	-2.08223		0	0	0	0	0	-149.102	-32.1944	-1655.14
																2110	-33.8194	-1088.62	3.30068	-245.943	1.52356e-07	55.0372	0	1.52356e-07	-1.8695	-256.812		-0.7085	-1.161	0	-2.08223		0	0	0	0	0	-149.102	-32.3882	-1687.53
																2111	-33.9572	-1122.58	3.25959	-242.683	1.21658e-07	55.0372	0	1.21658e-07	-1.8695	-258.682		-0.7085	-1.161	0	-2.08223		0	0	0	0	0	-149.102	-32.5671	-1720.09
																2112	-31.3998	-1153.98	3.21907	-239.464	9.96288e-08	55.0372	0	9.96288e-08	-1.8695	-260.551		-0.7085	-1.161	0	-2.08223		0	0	0	0	0	-149.102	-30.0502	-1750.14
																2113	-31.4856	-1185.47	3.17904	-236.285	8.37375e-08	55.0372	0	8.37375e-08	-1.8695	-262.421		-0.7085	-1.161	0	-2.08223		0	0	0	0	0	-149.102	-30.1761	-1780.32
																2114	-31.5679	-1217.03	3.13941	-233.146	7.21956e-08	55.0372	0	7.21956e-08	-1.8695	-264.29		-0.7085	-1.161	0	-2.08223		0	0	0	0	0	-149.102	-30.298	-1810.62
																2115	-31.646	-1248.68	3.10014	-230.046	6.37377e-08	55.0372	0	6.37377e-08	-1.8695	-266.16		-0.7085	-1.161	0	-2.08223		0	0	0	0	0	-149.102	-30.4154	-1841.03
																2116	-31.7194	-1280.4	3.06121	-226.984	5.74687e-08	55.0372	0	5.74687e-08	-1.8695	-268.029		-0.7085	-1.161	0	-2.08223		0	0	0	0	0	-149.102	-30.5277	-1871.56
																2117	-28.957	-1309.36	3.02258	-223.962	5.27554e-08	55.0372	0	5.27554e-08	-1.8695	-269.899		-0.7085	-1.161	0	-2.08223		0	0	0	0	0	-149.102	-27.8039	-1899.36
																2118	-28.9865	-1338.34	2.98425	-220.978	4.915e-08	55.0372	0	4.915e-08	-1.8695	-271.768		-0.7085	-1.161	0	-2.08223		0	0	0	0	0	-149.102	-27.8718	-1927.24
																2119	-29.0196	-1367.36	2.94622	-218.031	4.63353e-08	55.0372	0	4.63353e-08	-1.8695	-273.638		-0.7085	-1.161	0	-2.08223		0	0	0	0	0	-149.102	-27.9429	-1955.18
																2120	-29.0548	-1396.42	2.90848	-215.123	4.4087e-08	55.0372	0	4.4087e-08	-1.8695	-275.507		-0.7085	-1.161	0	-2.08223		0	0	0	0	0	-149.102	-28.0159	-1983.2

## Sheet: Yr4
																Summary of emissions discounts to apply (to 2020 assumptions):
																	2020-2029		2030-2039		2040-2049		2050-2084		2085-2120
																	Core	FA	Core	FA	Core	FA	Core	FA	Core	FA
																Avoided emissions - Biomass (heat) - marginal supply	none	none	none	none	none	0.25258	0.9	0.039435	0	0
																Avoided emissions - Biomass (electricity) - marginal supply	none	none	0.9127	0.5635	0.8254	0.127	0.5635	0	0.127	0
																Avoided emissions - Incineration (electricity) - marginal supply	none	none	0.9127	0.5635	0.8254	0.127	0.5635	0	0.127	0
																Incineration (heat) - marginal supply	none	none	none	none	none	0	0.9	0.136905	0	0
																C storage - BECCS (biomass electricity)	none	none	0.09	0.45	0.18	0.9	0.45	1	0.9	1
																C storage - BECCS (biomass heat)	none	none	0	0	0	0.405	0	0.81	0.405	0.9
																Avoided emissions - Cement production - CCS application (calcination)	n/a	n/a	n/a	n/a	n/a	n/a	none	0.45568	0.93952	0.3952
																Avoided emissions - Cement production - furnace emissions reduction	n/a	n/a	n/a	n/a	n/a	n/a	0.9784	0.95104	0.95104	0.712
																Emissions - Wood panel (particle board) production (CCS on heat production)	none	none	none	none	none	0.6355	none	0.271	0.6355	0.19
																Emissions - Harvester/forwarder	none	none	none	none	none	0.55	0.87	0.1	0	0
	Annual C stock - total ecosystem (tonnes C) - >75% thin									Natural Forest' C sequestration
	Time Step	Total Ecosystem(GH model (thinned) average soil v3 Default Simu			Thinned	Thinned	Thinned				'Total Ecosystem(Afforestation (conservation) Default Simulation					Core targets scenario
		Forest ecosystem	HWP total	Net system C	Mulch/S C storage	HWP primary	HWP secondary				Net ecosystem C	Process emissions	Annual C flux	Net cumulative C sequestration and storage			4th planting (Mg CO2 eq)																							Plantation (Core)
	Year	Tonnes C	Tonnes C		Tonnes C					Year	Tonnes C		Mg CO2eq			Year	Terrestrial C storage		HWP C storage		Forestry/ wood processing emissions (total)		Forestry/ primary wood processing emissions	Secondary wood processing emissions	(BE)CCS (total)		(BE)CCS (primary)	(BE)CCS (secondary)	(BE)CCS (tertiary)	FF offset (total)		Primary electricity offset (biomass + incineration)	Secondary electricity offset (biomass + incineration)	Tertiary electricity offset (biomass + incineration)	Heat offset (biomass)	Heat offset (incineration)	Concrete offset (net)		Net - annual flux	Net - cumulative C sequestration
																	Annual flux	Accumulation	Annual flux	Accumulation	Annual flux	Accumulation			Annual flux	Accumulation				Annual flux	Accumulation						Annual flux	Accumulation
	0	81	0	81	0	0	0			0						2020
	1	80.8365	0	80.8365		0	0			1						2021
	2	80.975	0	80.975		0	0			2						2022
	3	81.5	0	81.5		0	0			3	81	1.36461	5.00358	5.00358		2023	0	0	0	0	5.00358	5.00358	5.00358	0	0	0	0	0	0	0	0	0	0	0	0	0	0	0	5.00358	5.00358
	4	82.4699	0	82.4699		0	0			4	80.8429		0.575894	5.57947		2024	0.599623	0.599623	0	0	0	5.00358	0	0	0	0	0	0	0	0	0	0	0	0	0	0	0	0	0.599623	5.6032
	5	83.9295	0	83.9295		0	0			5	80.9424		-0.36473	5.21474		2025	-0.507923	0.0917007	0	0	0	5.00358	0	0	0	0	0	0	0	0	0	0	0	0	0	0	0	0	-0.507923	5.09528
	6	85.9132	0	85.9132		0	0			6	81.3393		-1.45544	3.7593		2026	-1.92493	-1.83323	0	0	0	5.00358	0	0	0	0	0	0	0	0	0	0	0	0	0	0	0	0	-1.92493	3.17035
	7	88.4465	0	88.4465		0	0			7	82.0617		-2.64872	1.11058		2027	-3.55635	-5.38958	0	0	0	5.00358	0	0	0	0	0	0	0	0	0	0	0	0	0	0	0	0	-3.55635	-0.386001
	8	91.5466	0	91.5466		0	0			8	83.1297		-3.91591	-2.80532		2028	-5.35193	-10.7415	0	0	0	5.00358	0	0	0	0	0	0	0	0	0	0	0	0	0	0	0	0	-5.35193	-5.73793
	9	95.2236	0	95.2236		0	0			9	84.5573		-5.23457	-8.03989		2029	-7.27359	-18.0151	0	0	0	5.00358	0	0	0	0	0	0	0	0	0	0	0	0	0	0	0	0	-7.27359	-13.0115
	10	99.4808	0	99.4808		0	0			10	86.3534		-6.58557	-14.6255		2030	-9.28859	-27.3037	0	0	0	5.00358	0	0	0	0	0	0	0	0	0	0	0	0	0	0	0	0	-9.28859	-22.3001
	11	104.315	0	104.315		0	0			11	88.5221		-7.95205	-22.5775		2031	-11.3672	-38.6709	0	0	0	5.00358	0	0	0	0	0	0	0	0	0	0	0	0	0	0	0	0	-11.3672	-33.6673
	12	109.719	0	109.719		0	0			12	91.0637		-9.31896	-31.8965		2032	-13.4824	-52.1533	0	0	0	5.00358	0	0	0	0	0	0	0	0	0	0	0	0	0	0	0	0	-13.4824	-47.1497
	13	115.68	0	115.68		0	0			13	93.9745		-10.673	-42.5695		2033	-15.6095	-67.7629	0	0	0	5.00358	0	0	0	0	0	0	0	0	0	0	0	0	0	0	0	0	-15.6095	-62.7593
	14	122.183	0	122.183		0	0			14	97.2478		-12.0023	-54.5718		2034	-17.7267	-85.4896	0	0	0	5.00358	0	0	0	0	0	0	0	0	0	0	0	0	0	0	0	0	-17.7267	-80.486
	15	129.207	0	129.207		0	0			15	100.874		-13.2969	-67.8687		2035	-19.8148	-105.304	0	0	0	5.00358	0	0	0	0	0	0	0	0	0	0	0	0	0	0	0	0	-19.8148	-100.301
	16	136.731	0	136.731		0	0			16	104.842		-14.548	-82.4167		2036	-21.8574	-127.162	0	0	0	5.00358	0	0	0	0	0	0	0	0	0	0	0	0	0	0	0	0	-21.8574	-122.158
	17	144.732	0	144.732		0	0			17	109.137		-15.7483	-98.165		2037	-23.8412	-151.003	0	0	0	5.00358	0	0	0	0	0	0	0	0	0	0	0	0	0	0	0	0	-23.8412	-145.999
	18	153.185	0	153.185		0	0			18	113.744		-16.8918	-115.057		2038	-25.7549	-176.758	0	0	0	5.00358	0	0	0	0	0	0	0	0	0	0	0	0	0	0	0	0	-25.7549	-171.754
	19	162.063	0	162.063		0	0			19	118.646		-17.9733	-133.03		2039	-27.5896	-204.347	0	0	0	5.00358	0	0	0	0	0	0	0	0	0	0	0	0	0	0	0	0	-27.5896	-199.344
	20	171.337	0	171.337		0	0			20	123.824		-18.9887	-152.019		2040	-29.338	-233.685	0	0	0	5.00358	0	0	0	0	0	0	0	0	0	0	0	0	0	0	0	0	-29.338	-228.682
	21	166.535	6.76672	173.301	0.415937	6.35078	0			21	129.261		-19.9347	-171.953		2041	-30.9935	-264.679	0	0	0	5.00358	0	0	0	0	0	0	0	0	0	0	0	0	0	0	0	0	-30.9935	-259.675
	22	174.253	6.00167	180.255		5.40511	0.596564			22	134.936		-20.8082	-192.762		2042	-32.5507	-297.23	0	0	0	5.00358	0	0	0	0	0	0	0	0	0	0	0	0	0	0	0	0	-32.5507	-292.226
	23	182.581	5.73256	188.313		4.71306	1.01951			23	138.961		-14.7598	-207.521		2043	-34.0044	-331.234	0	0	0	5.00358	0	0	0	0	0	0	0	0	0	0	0	0	0	0	0	0	-34.0044	-326.23
	24	191.425	5.52023	196.945		4.20096	1.31927			24	143.702		-17.382	-224.903		2044	17.6073	-313.627	-24.8113	-24.8113	8.32153	13.3251	8.32153	0	-3.1732	-3.1732	-2.83669	-0.12753	-0.20898	-5.08575	-5.08575	-5.08575	0	0	0	0	0	0	-7.14141	-333.372
	25	200.704	5.34825	206.052		3.81671	1.53154			25	148.506		-17.6139	-242.517		2045	-28.3006	-341.927	2.80517	-22.0061	3.74541e-07	13.3251	0	3.74541e-07	-0.33651	-3.50971		-0.12753	-0.20898	-1.47255	-6.5583	0	-0.219732	-1.25282	0	0	0	0	-27.3045	-360.676
	26	210.764	5.20501	215.969		3.52345	1.68155			26	153.352		-17.7693	-260.287		2046	-30.5355	-372.463	0.986722	-21.0194	2.74092e-07	13.3251	0	2.74092e-07	-0.33651	-3.84622		-0.12753	-0.20898	-1.41362	-7.97192	0	-0.160801	-1.25282	0	0	0	0	-31.2989	-391.975
	27	220.383	5.0823	225.465		3.2951	1.7872			27	159.692		-23.2471	-283.534		2047	-32.4275	-404.89	0.778555	-20.2408	2.0282e-07	13.3251	0	2.0282e-07	-0.33651	-4.18273		-0.12753	-0.20898	-1.37181	-9.34373	0	-0.118988	-1.25282	0	0	0	0	-33.3572	-425.332
	28	230.067	4.97433	235.041		3.11319	1.86114			28	165.832		-22.5139	-306.048		2048	-34.0251	-438.915	0.630603	-19.6102	1.52184e-07	13.3251	0	1.52184e-07	-0.33651	-4.51924		-0.12753	-0.20898	-1.3421	-10.6858	0	-0.0892818	-1.25282	0	0	0	0	-35.0731	-460.406
	29	239.806	4.87699	244.683		2.96466	1.91232			29	175.455		-35.2823	-341.33		2049	-36.8851	-475.8	0.52522	-19.085	1.16148e-07	13.3251	0	1.16148e-07	-0.33651	-4.85575		-0.12753	-0.20898	-1.32096	-12.0068	0	-0.0681406	-1.25282	0	0	0	0	-38.0174	-498.423
	30	249.591	4.78739	254.378		2.84026	1.94712			30	184.967		-34.8791	-376.209		2050	-35.2691	-511.07	0.449927	-18.6351	9.04419e-08	13.3251	0	9.04419e-08	-0.841274	-5.69702		-0.318825	-0.522449	-0.891522	-12.8983	0	-0.0362236	-0.855299	0	0	0	0	-36.5519	-534.975
	31	259.679	4.70348	264.382		2.73343	1.97004			31	194.39		-34.5515	-410.761		2051	-35.5086	-546.578	0.395902	-18.2392	7.20458e-08	13.3251	0	7.20458e-08	-0.841274	-6.5383		-0.318825	-0.522449	-0.884154	-13.7825	0	-0.0288557	-0.855299	0	0	0	0	-36.8381	-571.813
	32	269.8	4.62381	274.424		2.63952	1.98429			32	203.739		-34.2804	-445.041		2052	-35.7094	-582.288	0.356909	-17.8823	5.88248e-08	13.3251	0	5.88248e-08	-0.841274	-7.37957		-0.318825	-0.522449	-0.878859	-14.6613	0	-0.0235604	-0.855299	0	0	0	0	-37.0726	-608.886
	33	279.952	4.54737	284.499		2.55523	1.99214			33	213.027		-34.0532	-479.094		2053	-35.8788	-618.166	0.328537	-17.5537	4.92691e-08	13.3251	0	4.92691e-08	-0.841274	-8.22085		-0.318825	-0.522449	-0.875032	-15.5364	0	-0.0197332	-0.855299	0	0	0	0	-37.2665	-646.152
	34	290.127	4.47343	294.601		2.4782	1.99523			34	219.105		-22.2888	-501.383		2054	-36.9884	-655.155	0.30767	-17.2461	4.23108e-08	13.3251	0	4.23108e-08	-0.841274	-9.06212		-0.318825	-0.522449	-0.872245	-16.4086	0	-0.0169462	-0.855299	0	0	0	0	-38.3942	-684.546
	35	300.325	4.40149	304.726		2.40676	1.99473			35	225.133		-22.1014	-523.484		2055	-37.1136	-692.268	0.292104	-16.954	3.71945e-08	13.3251	0	3.71945e-08	-0.841274	-9.90339		-0.318825	-0.522449	-0.870196	-17.2788	0	-0.0148971	-0.855299	0	0	0	0	-38.533	-723.079
	36	310.163	4.33118	314.494		2.33973	1.99146			36	231.118		-21.9445	-545.429		2056	-37.2206	-729.489	0.280281	-16.6737	3.33861e-08	13.3251	0	3.33861e-08	-0.841274	-10.7447		-0.318825	-0.522449	-0.868671	-18.1475	0	-0.0133718	-0.855299	0	0	0	0	-38.6502	-761.73
	37	320.013	4.26226	324.276		2.27624	1.98602			37	237.067		-21.8117	-567.241		2057	-37.312	-766.801	0.271101	-16.4026	3.05077e-08	13.3251	0	3.05077e-08	-0.841274	-11.5859		-0.318825	-0.522449	-0.867518	-19.015	0	-0.0122189	-0.855299	0	0	0	0	-38.7497	-800.479
	38	329.876	4.19454	334.07		2.21567	1.97887			38	242.985		-21.699	-588.94		2058	-37.3905	-804.191	0.263788	-16.1388	2.8292e-08	13.3251	0	2.8292e-08	-0.841274	-12.4272		-0.318825	-0.522449	-0.86663	-19.8816	0	-0.0113315	-0.855299	0	0	0	0	-38.8346	-839.314
	39	339.748	4.1279	343.876		2.15757	1.97032			39	248.464		-20.0901	-609.03		2059	-36.0712	-840.263	0.257791	-15.881	2.65498e-08	13.3251	0	2.65498e-08	-0.841274	-13.2685		-0.318825	-0.522449	-0.865932	-20.7475	0	-0.0106337	-0.855299	0	0	0	0	-37.5206	-876.834
	40	349.63	4.06224	353.692		2.10163	1.96061			40	253.915		-19.989	-629.019		2060	-36.1194	-876.382	0.252723	-15.6283	2.51471e-08	13.3251	0	2.51471e-08	-0.841274	-14.1098		-0.318825	-0.522449	-0.865371	-21.6129	0	-0.0100719	-0.855299	0	0	0	0	-37.5733	-914.408
	41	358.788	3.99751	362.786		2.04758	1.94993			41	259.343		-19.9032	-648.922		2061	-36.1622	-912.544	0.24831	-15.38	2.39891e-08	13.3251	0	2.39891e-08	-0.841274	-14.951		-0.318825	-0.522449	-0.864907	-22.4778	0	-0.00960808	-0.855299	0	0	0	0	-37.62	-952.028
	42	367.946	3.93366	371.879		1.99526	1.93839			42	264.751		-19.8296	-668.752		2062	-36.1997	-948.744	0.244361	-15.1356	2.30087e-08	13.3251	0	2.30087e-08	-0.841274	-15.7923		-0.318825	-0.522449	-0.864514	-23.3423	0	-0.00921539	-0.855299	0	0	0	0	-37.6611	-989.689
	43	377.104	3.87066	380.974		1.94453	1.92613			43	270.142		-19.7665	-688.518		2063	-36.2329	-984.977	0.240738	-14.8949	2.21581e-08	13.3251	0	2.21581e-08	-0.841274	-16.6336		-0.318825	-0.522449	-0.864174	-24.2065	0	-0.00887474	-0.855299	0	0	0	0	-37.6976	-1027.39
	44	386.263	3.80848	390.071		1.89527	1.91321			44	275.112		-18.2224	-706.74		2064	-33.5798	-1018.56	0.237346	-14.6575	2.14037e-08	13.3251	0	2.14037e-08	-0.841274	-17.4749		-0.318825	-0.522449	-0.863871	-25.0704	0	-0.00857257	-0.855299	0	0	0	0	-35.0476	-1062.43
	45	395.423	3.74711	399.17		1.8474	1.89971			45	280.063		-18.1553	-724.896		2065	-33.5776	-1052.13	0.234119	-14.4234	2.07213e-08	13.3251	0	2.07213e-08	-0.841274	-18.3161		-0.318825	-0.522449	-0.863598	-25.934	0	-0.00829928	-0.855299	0	0	0	0	-35.0484	-1097.48
	46	403.812	3.68654	407.499		1.80085	1.88568			46	284.999		-18.0982	-742.994		2066	-33.5792	-1085.71	0.231009	-14.1924	2.0094e-08	13.3251	0	2.0094e-08	-0.841274	-19.1574		-0.318825	-0.522449	-0.863347	-26.7973	0	-0.00804801	-0.855299	0	0	0	0	-35.0529	-1132.54
	47	412.194	3.62675	415.82		1.75557	1.87118			47	289.924		-18.0569	-761.051		2067	-33.5828	-1119.3	0.227984	-13.9644	1.95094e-08	13.3251	0	1.95094e-08	-0.841274	-19.9987		-0.318825	-0.522449	-0.863113	-27.6604	0	-0.00781386	-0.855299	0	0	0	0	-35.0592	-1167.59
	48	420.569	3.56774	424.137		1.71149	1.85625			48	294.838		-18.0171	-779.068		2068	-33.5875	-1152.88	0.22502	-13.7394	1.89588e-08	13.3251	0	1.89588e-08	-0.841274	-20.84		-0.318825	-0.522449	-0.862892	-28.5233	0	-0.00759335	-0.855299	0	0	0	0	-35.0667	-1202.66
	49	428.94	3.5095	432.45		1.66858	1.84092			49	299.396		-16.7129	-795.781		2069	-30.7614	-1183.65	0.222103	-13.5173	1.8436e-08	13.3251	0	1.8436e-08	-0.841274	-21.6812		-0.318825	-0.522449	-0.862683	-29.386	0	-0.00738395	-0.855299	0	0	0	0	-32.2433	-1234.9
	50	250.406	117.514	367.92	8.22192	107.466	1.82594			50	303.94		-16.6615	-812.442		2070	-30.732	-1214.38	0.219221	-13.2981	1.79364e-08	13.3251	0	1.79364e-08	-0.841274	-22.5225		-0.318825	-0.522449	-0.862483	-30.2485	0	-0.00718385	-0.855299	0	0	0	0	-32.2165	-1267.12
	51	235.471	107.841	343.312		98.6261	9.21454			51	308.472		-16.6177	-829.06		2071	-30.7102	-1245.09	0.216367	-13.0817	1.74566e-08	13.3251	0	1.74566e-08	-0.841274	-23.3638		-0.318825	-0.522449	-0.862291	-31.1108	0	-0.00699171	-0.855299	0	0	0	0	-32.1974	-1299.32
	52	223.192	104.754	327.947		91.5144	13.2401			52	312.994		-16.5804	-845.64		2072	-30.6944	-1275.78	0.213536	-12.8682	1.69943e-08	13.3251	0	1.69943e-08	-0.841274	-24.205		-0.318825	-0.522449	-0.862105	-31.9729	0	-0.00680655	-0.855299	0	0	0	0	-32.1842	-1331.5
	53	213.194	102.116	315.311		85.7258	16.3903			53	317.507		-16.5483	-862.189		2073	654.627	-621.154	-418.017	-430.885	158.643	171.968	158.643	1.69943e-08	-45.4301	-69.6351	-44.5888	-0.318825	-0.522449	-23.1934	-55.1663	-22.2718	-0.00680655	-0.855299	0	-0.0594749	-336.622	-336.622	-9.9919	-1341.49
	54	205.188	99.8243	305.012		80.9551	18.8692			54	321.752		-15.5635	-877.752		2074	54.7601	-566.394	35.4692	-395.416	0.195766	172.164	0	0.195766	-0.841274	-70.4764		-0.318825	-0.522449	-2.21013	-57.3764		-1.29535	-0.855299	0	-0.0594749	0	-336.622	87.3737	-1254.12
	55	198.944	97.8011	296.745		76.9713	20.8298			55	325.986		-15.5257	-893.278		2075	45.0223	-521.372	11.316	-384.1	0.138427	172.302	0	0.138427	-0.841274	-71.3177		-0.318825	-0.522449	-1.96728	-59.3437		-1.0525	-0.855299	0	-0.0594749	0	-336.622	53.6681	-1200.45
	56	194.283	95.9867	290.27		73.5991	22.3876			56	330.211		-15.4932	-908.771		2076	36.6589	-484.713	9.67397	-374.426	0.097883	172.4	0	0.097883	-0.841274	-72.1589		-0.318825	-0.522449	-1.77953	-61.1232		-0.864758	-0.855299	0	-0.0594749	0	-336.622	43.8099	-1156.64
	57	191.057	94.3353	285.392		70.7051	23.6301			57	334.429		-15.4652	-924.236		2077	29.3588	-455.354	8.40341	-366.022	0.069214	172.469	0	0.069214	-0.841274	-73.0002		-0.318825	-0.522449	-1.63374	-62.757		-0.718961	-0.855299	0	-0.0594749	0	-336.622	35.3565	-1121.29
	58	189.141	92.8114	281.952		68.1873	24.6241			58	338.64		-15.441	-939.677		2078	22.8921	-432.462	7.41837	-358.604	0.0489419	172.518	0	0.0489419	-0.841274	-73.8415		-0.318825	-0.522449	-1.51998	-64.2769		-0.60521	-0.855299	0	-0.0594749	0	-336.622	27.9982	-1093.29
	59	188.431	91.388	279.819		65.9673	25.4208			59	342.529		-14.2596	-953.937		2079	17.0904	-415.372	6.65266	-351.951	0.0346074	172.553	0	0.0346074	-0.841274	-74.6828		-0.318825	-0.522449	-1.43079	-65.7077		-0.516016	-0.855299	0	-0.0594749	0	-336.622	21.5057	-1071.78
	60	188.835	90.0444	278.88		63.9849	26.0595			60	346.407		-14.2193	-968.156		2080	11.8309	-403.541	6.05542	-345.896	0.0244713	172.577	0	0.0244713	-0.841274	-75.524		-0.318825	-0.522449	-1.36048	-67.0682		-0.445704	-0.855299	0	-0.0594749	0	-336.622	15.7091	-1056.07
	61	190.272	88.7644	279.036		62.1935	26.5709			61	350.276		-14.1847	-982.341		2081	7.02363	-396.517	5.58754	-340.308	0.017304	172.594	0	0.017304	-0.841274	-76.3653		-0.318825	-0.522449	-1.30473	-68.3729		-0.389954	-0.855299	0	-0.0594749	0	-336.622	10.4825	-1045.59
	62	192.666	87.5359	280.202		60.5572	26.9787			62	354.136		-14.1547	-996.496		2082	2.60238	-393.915	5.219	-335.089	0.012236	172.607	0	0.012236	-0.841274	-77.2066		-0.318825	-0.522449	-1.26025	-69.6332		-0.345474	-0.855299	0	-0.0594749	0	-336.622	5.7321	-1039.86
	63	195.951	86.3493	282.3		59.0477	27.3016			63	358.007		-14.1943	-1010.69		2083	-1.48191	-395.397	4.92676	-330.163	0.0086523	172.615	0	0.0086523	-0.841274	-78.0479		-0.318825	-0.522449	-1.22451	-70.8577		-0.309739	-0.855299	0	-0.0594749	0	-336.622	1.38771	-1038.47
	64	200.063	85.1975	285.26		57.6432	27.5543			64	361.578		-13.0916	-1023.78		2084	-5.26639	-400.663	4.69314	-325.469	0.00611825	172.621	0	0.00611825	-0.841274	-78.8891		-0.318825	-0.522449	-1.19559	-72.0533		-0.280814	-0.855299	0	-0.0594749	0	-336.622	-2.60399	-1041.08
	65	204.944	84.0748	289.018		56.3264	27.7484			65	365.139		-13.0578	-1036.84		2085	-8.77949	-409.443	4.50457	-320.965	0.00274943	172.624	0	0.00274943	-1.68255	-80.5717		-0.63765	-1.0449	-0.250734	-72.304		-0.0579691	-0.192765	0	0	0	-336.622	-6.20545	-1047.28
	66	210.537	82.977	293.514		55.0837	27.8932			66	368.692		-13.0286	-1049.87		2086	-12.0439	-421.486	4.35064	-316.614	0.00194423	172.626	0	0.00194423	-1.68255	-82.2542		-0.63765	-1.0449	-0.246353	-72.5504		-0.0535887	-0.192765	0	0	0	-336.622	-9.62024	-1056.9
	67	216.792	81.9006	298.692		53.9045	27.996			67	372.239		-13.0033	-1062.87		2087	-15.0777	-436.564	4.22335	-312.391	0.00137486	172.628	0	0.00137486	-1.68255	-83.9368		-0.63765	-1.0449	-0.242712	-72.7931		-0.0499472	-0.192765	0	0	0	-336.622	-12.7783	-1069.68
	68	223.656	80.8432	304.499		52.7802	28.0629			68	375.779		-12.9809	-1075.85		2088	-17.8959	-454.46	4.11656	-308.274	0.000972256	172.628	0	0.000972256	-1.68255	-85.6193		-0.63765	-1.0449	-0.239654	-73.0327		-0.0468889	-0.192765	0	0	0	-336.622	-15.7006	-1085.38
	69	231.081	79.8027	310.884		51.704	28.0988			69	378.979		-11.733	-1087.59		2089	-20.5107	-474.971	4.02554	-304.249	0.000687568	172.629	0	0.000687568	-1.68255	-87.3019		-0.63765	-1.0449	-0.237057	-73.2698		-0.0442926	-0.192765	0	0	0	-336.622	-18.4041	-1103.78
	70	239.02	78.7778	317.797		50.6703	28.1075			70	382.167		-11.6891	-1099.27		2090	-22.9322	-497.903	3.94668	-300.302	0.000486259	172.63	0	0.000486259	-1.68255	-88.9844		-0.63765	-1.0449	-0.234829	-73.5046		-0.042064	-0.192765	0	0	0	-336.622	-20.9024	-1124.69
	71	231.313	89.8941	321.207	4.95963	56.8177	28.1167			71	385.344		-11.6509	-1110.93		2091	-25.1684	-523.071	3.87718	-296.425	0.00034391	172.63	0	0.00034391	-1.68255	-90.667		-0.63765	-1.0449	-0.232894	-73.7375		-0.0401291	-0.192765	0	0	0	-336.622	-23.2063	-1147.89
	72	237.694	83.5438	321.238		54.793	28.7508			72	388.513		-11.6174	-1122.54		2092	-27.2256	-550.297	3.8149	-292.61	0.000243252	172.63	0	0.000243252	-1.68255	-92.3495		-0.63765	-1.0449	-0.231195	-73.9687		-0.0384303	-0.192765	0	0	0	-336.622	-25.3242	-1173.22
	73	244.775	82.256	327.031		53.0851	29.1708			73	391.673		-11.5877	-1134.13		2093	-29.1086	-579.405	3.75818	-288.852	0.000172074	172.63	0	0.000172074	-1.68255	-94.0321		-0.63765	-1.0449	-0.229687	-74.1984		-0.036922	-0.192765	0	0	0	-336.622	-27.2625	-1200.48
	74	252.449	81.0441	333.493		51.6087	29.4354			74	394.647		-10.9046	-1145.03		2094	28.2574	-551.148	-40.7597	-329.612	5.89236	178.523	5.89176	0.000600351	-17.6353	-111.667	-15.9528	-0.63765	-1.0449	-0.853094	-75.0515	-0.880131	0.219802	-0.192765	0	0	0	-336.622	-25.0983	-1225.58
	75	261.038	79.8894	340.928		50.303	29.5864			75	397.611		-10.8671	-1155.9		2095	-23.3968	-574.545	23.2842	-306.327	8.64165e-05	178.523	0	8.64165e-05	-1.68255	-113.35		-0.63765	-1.0449	-0.265133	-75.3166		-0.0723685	-0.192765	0	0	0	-336.622	-2.06018	-1227.64
	76	269.304	78.7785	348.082		49.1249	29.6536			76	400.565		-10.8334	-1166.74		2096	-25.9644	-600.509	4.72222	-301.605	6.11752e-05	178.523	0	6.11752e-05	-1.68255	-115.032		-0.63765	-1.0449	-0.253813	-75.5704		-0.0610481	-0.192765	0	0	0	-336.622	-23.1785	-1250.82
	77	277.737	77.7018	355.439		48.0436	29.6582			77	403.511		-10.8033	-1177.54		2097	-28.1377	-628.647	4.44339	-297.162	4.3325e-05	178.523	0	4.3325e-05	-1.68255	-116.715		-0.63765	-1.0449	-0.245542	-75.816		-0.0527767	-0.192765	0	0	0	-336.622	-25.6224	-1276.44
	78	286.315	76.6527	362.967		47.0369	29.6157			78	406.45		-10.776	-1188.31		2098	-31.493	-660.14	4.23386	-292.928	3.07013e-05	178.523	0	3.07013e-05	-1.68255	-118.398		-0.63765	-1.0449	-0.239438	-76.0554		-0.0466735	-0.192765	0	0	0	-336.622	-29.1811	-1305.62
	79	295.019	75.6263	370.645		46.0892	29.5371			79	408.192		-6.38738	-1194.7		2099	-30.3066	-690.446	4.07344	-288.855	2.17732e-05	178.523	0	2.17732e-05	-1.68255	-120.08		-0.63765	-1.0449	-0.234879	-76.2903		-0.0421142	-0.192765	0	0	0	-336.622	-28.1506	-1333.77
	80	304.096	74.6192	378.715		45.189	29.4303			80	409.898		-6.2551	-1200.96		2100	-30.9215	-721.368	3.94783	-284.907	1.54585e-05	178.523	0	1.54585e-05	-1.68255	-121.763		-0.63765	-1.0449	-0.231421	-76.5217		-0.0386563	-0.192765	0	0	0	-336.622	-28.8876	-1362.66
	81	313.27	73.6291	386.9		44.328	29.3012			81	411.573		-6.13887	-1207.1		2101	-31.4525	-752.821	3.84689	-281.06	1.09917e-05	178.523	0	1.09917e-05	-1.68255	-123.445		-0.63765	-1.0449	-0.228751	-76.7505		-0.0359863	-0.192765	0	0	0	-336.622	-29.5169	-1392.17
	82	322.531	72.6543	395.185		43.5002	29.1541			82	413.219		-6.03548	-1213.13		2102	-31.9141	-784.735	3.76347	-277.296	7.83171e-06	178.523	0	7.83171e-06	-1.68255	-125.128		-0.63765	-1.0449	-0.226646	-76.9771		-0.0338814	-0.192765	0	0	0	-336.622	-30.0598	-1422.23
	83	331.867	71.6934	403.56		42.7012	28.9922			83	414.839		-5.94241	-1219.07		2103	-33.2832	-818.018	3.69248	-273.604	5.59576e-06	178.523	0	5.59576e-06	-1.68255	-126.81		-0.63765	-1.0449	-0.224948	-77.2021		-0.0321837	-0.192765	0	0	0	-336.622	-31.4983	-1453.73
	84	341.271	70.7457	412.016		41.9277	28.8179			84	416.17		-4.88069	-1223.95		2104	-33.6402	-851.658	3.63034	-269.974	4.01329e-06	178.523	0	4.01329e-06	-1.68255	-128.493		-0.63765	-1.0449	-0.223546	-77.4256		-0.0307811	-0.192765	0	0	0	-336.622	-31.916	-1485.65
	85	350.356	69.8104	420.166		41.1772	28.6332			85	417.475		-4.78507	-1228.74		2105	-33.9547	-885.613	3.57451	-266.399	2.89294e-06	178.523	0	2.89294e-06	-1.68255	-130.175		-0.63765	-1.0449	-0.222358	-77.648		-0.0295936	-0.192765	0	0	0	-336.622	-32.2851	-1517.93
	86	359.492	68.8871	428.379		40.4478	28.4393			86	418.757		-4.69816	-1233.44		2106	-34.2328	-919.846	3.52318	-262.876	2.09939e-06	178.523	0	2.09939e-06	-1.68255	-131.858		-0.63765	-1.0449	-0.221329	-77.8693		-0.0285645	-0.192765	0	0	0	-336.622	-32.6135	-1550.55
	87	368.674	67.9755	436.649		39.738	28.2375			87	420.016		-4.61831	-1238.06		2107	-34.4797	-954.325	3.47509	-259.401	1.53698e-06	178.523	0	1.53698e-06	-1.68255	-133.54		-0.63765	-1.0449	-0.220418	-78.0897		-0.0276532	-0.192765	0	0	0	-336.622	-32.9076	-1583.45
	88	377.897	67.0753	444.973		39.0466	28.0287			88	421.256		-4.54422	-1242.6		2108	-33.3127	-987.638	3.42934	-255.971	1.13804e-06	178.523	0	1.13804e-06	-1.68255	-135.223		-0.63765	-1.0449	-0.219596	-78.3093		-0.0268309	-0.192765	0	0	0	-336.622	-31.7855	-1615.24
	89	387.158	66.1864	453.345		38.3727	27.8137			89	422.476		-4.47498	-1247.08		2109	-33.4991	-1021.14	3.38529	-252.586	8.54733e-07	178.523	0	8.54733e-07	-1.68255	-136.906		-0.63765	-1.0449	-0.218842	-78.5282		-0.0260768	-0.192765	0	0	0	-336.622	-32.0152	-1647.26
	90	395.722	65.3084	461.03		37.7154	27.5931			90	423.679		-4.40976	-1251.48		2110	-33.6674	-1054.8	3.34251	-249.244	6.53225e-07	178.523	0	6.53225e-07	-1.68255	-138.588		-0.63765	-1.0449	-0.218141	-78.7463		-0.025376	-0.192765	0	0	0	-336.622	-32.2256	-1679.48
	91	404.309	64.4414	468.75		37.074	27.3675			91	424.864		-4.34804	-1255.83		2111	-33.8194	-1088.62	3.30068	-245.943	5.09592e-07	178.523	0	5.09592e-07	-1.68255	-140.271		-0.63765	-1.0449	-0.217483	-78.9638		-0.0247178	-0.192765	0	0	0	-336.622	-32.4187	-1711.9
	92	412.918	63.5852	476.504		36.4479	27.1373			92	426.034		-4.28925	-1260.12		2112	-33.9572	-1122.58	3.25959	-242.683	4.06915e-07	178.523	0	4.06915e-07	-1.68255	-141.953		-0.63765	-1.0449	-0.216859	-79.1806		-0.0240944	-0.192765	0	0	0	-336.622	-32.597	-1744.5
	93	421.549	62.7397	484.289		35.8366	26.9032			93	427.189		-4.23307	-1264.36		2113	-31.3998	-1153.98	3.21907	-239.464	3.33232e-07	178.523	0	3.33232e-07	-1.68255	-143.636		-0.63765	-1.0449	-0.216265	-79.3969		-0.0235001	-0.192765	0	0	0	-336.622	-30.0795	-1774.58
	94	430.2	61.9048	492.105		35.2395	26.6653			94	428.329		-4.1791	-1268.53		2114	-31.4856	-1185.47	3.17904	-236.285	2.8008e-07	178.523	0	2.8008e-07	-1.68255	-145.318		-0.63765	-1.0449	-0.215696	-79.6126		-0.0229308	-0.192765	0	0	0	-336.622	-30.2048	-1804.78
	95	438.097	61.0805	499.178		34.6563	26.4242			95	429.454		-4.12711	-1272.66		2115	-31.5679	-1217.03	3.13941	-233.146	2.41475e-07	178.523	0	2.41475e-07	-1.68255	-147.001		-0.63765	-1.0449	-0.215148	-79.8277		-0.0223832	-0.192765	0	0	0	-336.622	-30.3262	-1835.11
	96	446.003	60.2666	506.269		34.0865	26.1801			96	430.566		-4.07697	-1276.74		2116	-31.646	-1248.68	3.10014	-230.046	2.13186e-07	178.523	0	2.13186e-07	-1.68255	-148.683		-0.63765	-1.0449	-0.21462	-80.0424		-0.0218552	-0.192765	0	0	0	-336.622	-30.443	-1865.55
	97	453.917	59.4631	513.38		33.5297	25.9334			97	431.665		-4.02836	-1280.77		2117	-31.7194	-1280.4	3.06121	-226.984	1.92218e-07	178.523	0	1.92218e-07	-1.68255	-150.366		-0.63765	-1.0449	-0.21411	-80.2565		-0.0213448	-0.192765	0	0	0	-336.622	-30.5549	-1896.11
	98	461.841	58.6699	520.511		32.9855	25.6844			98	432.75		-3.98124	-1284.75		2118	-28.957	-1309.36	3.02258	-223.962	1.76453e-07	178.523	0	1.76453e-07	-1.68255	-152.049		-0.63765	-1.0449	-0.213615	-80.4701		-0.0208507	-0.192765	0	0	0	-336.622	-27.8306	-1923.94
	99	469.775	57.8869	527.662		32.4535	25.4334			99	433.824		-3.93546	-1288.68		2119	-28.9865	-1338.34	2.98425	-220.978	1.64394e-07	178.523	0	1.64394e-07	-1.68255	-153.731		-0.63765	-1.0449	-0.213136	-80.6832		-0.0203717	-0.192765	0	0	0	-336.622	-27.898	-1951.83
	100	288.179	177.741	465.92	10.907	139.448	27.3859			100	434.885		-3.89085	-1292.57		2120	-29.0196	-1367.36	2.94622	-218.031	1.54979e-07	178.523	0	1.54979e-07	-1.68255	-155.414		-0.63765	-1.0449	-0.212672	-80.8959		-0.019907	-0.192765	0	0	0	-336.622	-27.9686	-1979.8
																Further Ambition targets scenario
																	4th planting (Mg CO2 eq)																							Plantation (Core)
																Year	Terrestrial C storage		HWP C storage		Forestry/ wood processing emissions (total)		Forestry/ primary wood processing emissions	Secondary wood processing emissions	(BE)CCS (total)		(BE)CCS (primary)	(BE)CCS (secondary)	(BE)CCS (tertiary)	FF offset (total)		Primary electricity offset (biomass + incineration)	Secondary electricity offset (biomass + incineration)	Tertiary electricity offset (biomass + incineration)	Heat offset (biomass)	Heat offset (incineration)	Concrete offset (net)		Net - annual flux	Net - cumulative C sequestration
																	Annual flux	Accumulation	Annual flux	Accumulation	Annual flux	Accumulation			Annual flux	Accumulation				Annual flux	Accumulation						Annual flux	Accumulation
																2020
																2021
																2022
																2023	0	0	0	0	5.00358	5.00358	5.00358	0	0	0	0	0	0	0	0	0	0	0	0	0	0	0	5.00358	5.00358
																2024	0.599623	0.599623	0	0	0	5.00358	0	0	0	0	0	0	0	0	0	0	0	0	0	0	0	0	0.599623	5.6032
																2025	-0.507923	0.0917007	0	0	0	5.00358	0	0	0	0	0	0	0	0	0	0	0	0	0	0	0	0	-0.507923	5.09528
																2026	-1.92493	-1.83323	0	0	0	5.00358	0	0	0	0	0	0	0	0	0	0	0	0	0	0	0	0	-1.92493	3.17035
																2027	-3.55635	-5.38958	0	0	0	5.00358	0	0	0	0	0	0	0	0	0	0	0	0	0	0	0	0	-3.55635	-0.386001
																2028	-5.35193	-10.7415	0	0	0	5.00358	0	0	0	0	0	0	0	0	0	0	0	0	0	0	0	0	-5.35193	-5.73793
																2029	-7.27359	-18.0151	0	0	0	5.00358	0	0	0	0	0	0	0	0	0	0	0	0	0	0	0	0	-7.27359	-13.0115
																2030	-9.28859	-27.3037	0	0	0	5.00358	0	0	0	0	0	0	0	0	0	0	0	0	0	0	0	0	-9.28859	-22.3001
																2031	-11.3672	-38.6709	0	0	0	5.00358	0	0	0	0	0	0	0	0	0	0	0	0	0	0	0	0	-11.3672	-33.6673
																2032	-13.4824	-52.1533	0	0	0	5.00358	0	0	0	0	0	0	0	0	0	0	0	0	0	0	0	0	-13.4824	-47.1497
																2033	-15.6095	-67.7629	0	0	0	5.00358	0	0	0	0	0	0	0	0	0	0	0	0	0	0	0	0	-15.6095	-62.7593
																2034	-17.7267	-85.4896	0	0	0	5.00358	0	0	0	0	0	0	0	0	0	0	0	0	0	0	0	0	-17.7267	-80.486
																2035	-19.8148	-105.304	0	0	0	5.00358	0	0	0	0	0	0	0	0	0	0	0	0	0	0	0	0	-19.8148	-100.301
																2036	-21.8574	-127.162	0	0	0	5.00358	0	0	0	0	0	0	0	0	0	0	0	0	0	0	0	0	-21.8574	-122.158
																2037	-23.8412	-151.003	0	0	0	5.00358	0	0	0	0	0	0	0	0	0	0	0	0	0	0	0	0	-23.8412	-145.999
																2038	-25.7549	-176.758	0	0	0	5.00358	0	0	0	0	0	0	0	0	0	0	0	0	0	0	0	0	-25.7549	-171.754
																2039	-27.5896	-204.347	0	0	0	5.00358	0	0	0	0	0	0	0	0	0	0	0	0	0	0	0	0	-27.5896	-199.344
																2040	-29.338	-233.685	0	0	0	5.00358	0	0	0	0	0	0	0	0	0	0	0	0	0	0	0	0	-29.338	-228.682
																2041	-30.9935	-264.679	0	0	0	5.00358	0	0	0	0	0	0	0	0	0	0	0	0	0	0	0	0	-30.9935	-259.675
																2042	-32.5507	-297.23	0	0	0	5.00358	0	0	0	0	0	0	0	0	0	0	0	0	0	0	0	0	-32.5507	-292.226
																2043	-34.0044	-331.234	0	0	0	5.00358	0	0	0	0	0	0	0	0	0	0	0	0	0	0	0	0	-34.0044	-326.23
																2044	17.6073	-313.627	-24.8113	-24.8113	5.09947	10.103	5.09947	0	-15.866	-15.866	-14.1835	-0.63765	-1.0449	-0.782518	-0.782518	-0.782518	0	0	0	0	0	0	-18.7531	-344.983
																2045	-28.3006	-341.927	2.80517	-22.0061	2.38021e-07	10.103	0	2.38021e-07	-1.68255	-17.5486		-0.63765	-1.0449	-0.226574	-1.00909	0	-0.033809	-0.192765	0	0	0	0	-27.4045	-372.388
																2046	-30.5355	-372.463	0.986722	-21.0194	1.74186e-07	10.103	0	1.74186e-07	-1.68255	-19.2311		-0.63765	-1.0449	-0.217506	-1.2266	0	-0.0247417	-0.192765	0	0	0	0	-31.4488	-403.837
																2047	-32.4275	-404.89	0.778555	-20.2408	1.28892e-07	10.103	0	1.28892e-07	-1.68255	-20.9137		-0.63765	-1.0449	-0.211073	-1.43767	0	-0.0183081	-0.192765	0	0	0	0	-33.5425	-437.379
																2048	-34.0251	-438.915	0.630603	-19.6102	9.67131e-08	10.103	0	9.67131e-08	-1.68255	-22.5962		-0.63765	-1.0449	-0.206502	-1.64417	0	-0.0137373	-0.192765	0	0	0	0	-35.2836	-472.663
																2049	-36.8851	-475.8	0.52522	-19.085	7.38122e-08	10.103	0	7.38122e-08	-1.68255	-24.2788		-0.63765	-1.0449	-0.203249	-1.84742	0	-0.0104844	-0.192765	0	0	0	0	-38.2457	-510.909
																2050	-35.2691	-511.07	0.449927	-18.6351	2.45097e-08	10.103	0	2.45097e-08	-1.8695	-26.1483		-0.7085	-1.161	0	-1.84742	0	0	0	0	0	0	0	-36.6886	-547.597
																2051	-35.5086	-546.578	0.395902	-18.2392	1.95244e-08	10.103	0	1.95244e-08	-1.8695	-28.0177		-0.7085	-1.161	0	-1.84742	0	0	0	0	0	0	0	-36.9822	-584.579
																2052	-35.7094	-582.288	0.356909	-17.8823	1.59415e-08	10.103	0	1.59415e-08	-1.8695	-29.8872		-0.7085	-1.161	0	-1.84742	0	0	0	0	0	0	0	-37.222	-621.801
																2053	-35.8788	-618.166	0.328537	-17.5537	1.33519e-08	10.103	0	1.33519e-08	-1.8695	-31.7567		-0.7085	-1.161	0	-1.84742	0	0	0	0	0	0	0	-37.4197	-659.221
																2054	-36.9884	-655.155	0.30767	-17.2461	1.14662e-08	10.103	0	1.14662e-08	-1.8695	-33.6262		-0.7085	-1.161	0	-1.84742	0	0	0	0	0	0	0	-38.5502	-697.771
																2055	-37.1136	-692.268	0.292104	-16.954	1.00797e-08	10.103	0	1.00797e-08	-1.8695	-35.4957		-0.7085	-1.161	0	-1.84742	0	0	0	0	0	0	0	-38.691	-736.462
																2056	-37.2206	-729.489	0.280281	-16.6737	9.04763e-09	10.103	0	9.04763e-09	-1.8695	-37.3652		-0.7085	-1.161	0	-1.84742	0	0	0	0	0	0	0	-38.8098	-775.272
																2057	-37.312	-766.801	0.271101	-16.4026	8.2676e-09	10.103	0	8.2676e-09	-1.8695	-39.2347		-0.7085	-1.161	0	-1.84742	0	0	0	0	0	0	0	-38.9104	-814.183
																2058	-37.3905	-804.191	0.263788	-16.1388	7.66714e-09	10.103	0	7.66714e-09	-1.8695	-41.1042		-0.7085	-1.161	0	-1.84742	0	0	0	0	0	0	0	-38.9962	-853.179
																2059	-36.0712	-840.263	0.257791	-15.881	7.19499e-09	10.103	0	7.19499e-09	-1.8695	-42.9737		-0.7085	-1.161	0	-1.84742	0	0	0	0	0	0	0	-37.6829	-890.862
																2060	-36.1194	-876.382	0.252723	-15.6283	6.81486e-09	10.103	0	6.81486e-09	-1.8695	-44.8432		-0.7085	-1.161	0	-1.84742	0	0	0	0	0	0	0	-37.7362	-928.598
																2061	-36.1622	-912.544	0.24831	-15.38	6.50104e-09	10.103	0	6.50104e-09	-1.8695	-46.7127		-0.7085	-1.161	0	-1.84742	0	0	0	0	0	0	0	-37.7834	-966.381
																2062	-36.1997	-948.744	0.244361	-15.1356	6.23535e-09	10.103	0	6.23535e-09	-1.8695	-48.5822		-0.7085	-1.161	0	-1.84742	0	0	0	0	0	0	0	-37.8248	-1004.21
																2063	-36.2329	-984.977	0.240738	-14.8949	6.00485e-09	10.103	0	6.00485e-09	-1.8695	-50.4517		-0.7085	-1.161	0	-1.84742	0	0	0	0	0	0	0	-37.8616	-1042.07
																2064	-33.5798	-1018.56	0.237346	-14.6575	5.8004e-09	10.103	0	5.8004e-09	-1.8695	-52.3212		-0.7085	-1.161	0	-1.84742	0	0	0	0	0	0	0	-35.212	-1077.28
																2065	-33.5776	-1052.13	0.234119	-14.4234	5.61548e-09	10.103	0	5.61548e-09	-1.8695	-54.1907		-0.7085	-1.161	0	-1.84742	0	0	0	0	0	0	0	-35.213	-1112.49
																2066	-33.5792	-1085.71	0.231009	-14.1924	5.44546e-09	10.103	0	5.44546e-09	-1.8695	-56.0602		-0.7085	-1.161	0	-1.84742	0	0	0	0	0	0	0	-35.2177	-1147.71
																2067	-33.5828	-1119.3	0.227984	-13.9644	5.28704e-09	10.103	0	5.28704e-09	-1.8695	-57.9297		-0.7085	-1.161	0	-1.84742	0	0	0	0	0	0	0	-35.2243	-1182.93
																2068	-33.5875	-1152.88	0.22502	-13.7394	5.13784e-09	10.103	0	5.13784e-09	-1.8695	-59.7992		-0.7085	-1.161	0	-1.84742	0	0	0	0	0	0	0	-35.232	-1218.17
																2069	-30.7614	-1183.65	0.222103	-13.5173	4.99615e-09	10.103	0	4.99615e-09	-1.8695	-61.6687		-0.7085	-1.161	0	-1.84742	0	0	0	0	0	0	0	-32.4088	-1250.58
																2070	-30.732	-1214.38	0.219221	-13.2981	4.86076e-09	10.103	0	4.86076e-09	-1.8695	-63.5382		-0.7085	-1.161	0	-1.84742	0	0	0	0	0	0	0	-32.3822	-1282.96
																2071	-30.7102	-1245.09	0.216367	-13.0817	4.73075e-09	10.103	0	4.73075e-09	-1.8695	-65.4077		-0.7085	-1.161	0	-1.84742	0	0	0	0	0	0	0	-32.3634	-1315.32
																2072	-30.6944	-1275.78	0.213536	-12.8682	4.60547e-09	10.103	0	4.60547e-09	-1.8695	-67.2772		-0.7085	-1.161	0	-1.84742	0	0	0	0	0	0	0	-32.3503	-1347.67
																2073	654.627	-621.154	-418.017	-430.885	42.9922	53.0952	42.9922	4.60547e-09	-100.956	-168.233	-99.0862	-0.7085	-1.161	-0.00260599	-1.85003	0	0	0	0	-0.00260599	-149.102	-149.102	29.5421	-1318.13
																2074	54.7601	-566.394	35.4692	-395.416	0.0530527	53.1483	0	0.0530527	-1.8695	-170.102		-0.7085	-1.161	-0.00260599	-1.85263		0	0	0	-0.00260599	0	-149.102	88.4103	-1229.72
																2075	45.0223	-521.372	11.316	-384.1	0.0375137	53.1858	0	0.0375137	-1.8695	-171.972		-0.7085	-1.161	-0.00260599	-1.85524		0	0	0	-0.00260599	0	-149.102	54.5036	-1175.22
																2076	36.6589	-484.713	9.67397	-374.426	0.0265263	53.2123	0	0.0265263	-1.8695	-173.841		-0.7085	-1.161	-0.00260599	-1.85785		0	0	0	-0.00260599	0	-149.102	44.4873	-1130.73
																2077	29.3588	-455.354	8.40341	-366.022	0.018757	53.2311	0	0.018757	-1.8695	-175.711		-0.7085	-1.161	-0.00260599	-1.86045		0	0	0	-0.00260599	0	-149.102	35.9089	-1094.82
																2078	22.8921	-432.462	7.41837	-358.604	0.0132633	53.2443	0	0.0132633	-1.8695	-177.58		-0.7085	-1.161	-0.00260599	-1.86306		0	0	0	-0.00260599	0	-149.102	28.4516	-1066.37
																2079	17.0904	-415.372	6.65266	-351.951	0.0093786	53.2537	0	0.0093786	-1.8695	-179.45		-0.7085	-1.161	-0.00260599	-1.86566		0	0	0	-0.00260599	0	-149.102	21.8804	-1044.49
																2080	11.8309	-403.541	6.05542	-345.896	0.00663173	53.2603	0	0.00663173	-1.8695	-181.319		-0.7085	-1.161	-0.00260599	-1.86827		0	0	0	-0.00260599	0	-149.102	16.0209	-1028.47
																2081	7.02363	-396.517	5.58754	-340.308	0.00468939	53.265	0	0.00468939	-1.8695	-183.189		-0.7085	-1.161	-0.00260599	-1.87088		0	0	0	-0.00260599	0	-149.102	10.7438	-1017.72
																2082	2.60238	-393.915	5.219	-335.089	0.00331595	53.2684	0	0.00331595	-1.8695	-185.058		-0.7085	-1.161	-0.00260599	-1.87348		0	0	0	-0.00260599	0	-149.102	5.95259	-1011.77
																2083	-1.48191	-395.397	4.92676	-330.163	0.00234477	53.2707	0	0.00234477	-1.8695	-186.928		-0.7085	-1.161	-0.00260599	-1.87609		0	0	0	-0.00260599	0	-149.102	1.57509	-1010.19
																2084	-5.26639	-400.663	4.69314	-325.469	0.00165805	53.2724	0	0.00165805	-1.8695	-188.797		-0.7085	-1.161	-0.00260599	-1.87869		0	0	0	-0.00260599	0	-149.102	-2.44369	-1012.64
																2085	-8.77949	-409.443	4.50457	-320.965	0.000822017	53.2732	0	0.000822017	-1.8695	-190.667		-0.7085	-1.161	0	-1.87869		0	0	0	0	0	-149.102	-6.14359	-1018.78
																2086	-12.0439	-421.486	4.35064	-316.614	0.00058128	53.2738	0	0.00058128	-1.8695	-192.536		-0.7085	-1.161	0	-1.87869		0	0	0	0	0	-149.102	-9.5622	-1028.34
																2087	-15.0777	-436.564	4.22335	-312.391	0.000411053	53.2742	0	0.000411053	-1.8695	-194.406		-0.7085	-1.161	0	-1.87869		0	0	0	0	0	-149.102	-12.7235	-1041.07
																2088	-17.8959	-454.46	4.11656	-308.274	0.000290682	53.2745	0	0.000290682	-1.8695	-196.275		-0.7085	-1.161	0	-1.87869		0	0	0	0	0	-149.102	-15.6486	-1056.72
																2089	-20.5107	-474.971	4.02554	-304.249	0.000205567	53.2747	0	0.000205567	-1.8695	-198.145		-0.7085	-1.161	0	-1.87869		0	0	0	0	0	-149.102	-18.3545	-1075.07
																2090	-22.9322	-497.903	3.94668	-300.302	0.00014538	53.2748	0	0.00014538	-1.8695	-200.014		-0.7085	-1.161	0	-1.87869		0	0	0	0	0	-149.102	-20.8548	-1095.93
																2091	-25.1684	-523.071	3.87718	-296.425	0.000102821	53.2749	0	0.000102821	-1.8695	-201.884		-0.7085	-1.161	0	-1.87869		0	0	0	0	0	-149.102	-23.1606	-1119.09
																2092	-27.2256	-550.297	3.8149	-292.61	7.27268e-05	53.275	0	7.27268e-05	-1.8695	-203.753		-0.7085	-1.161	0	-1.87869		0	0	0	0	0	-149.102	-25.2801	-1144.37
																2093	-29.1086	-579.405	3.75818	-288.852	5.14462e-05	53.275	0	5.14462e-05	-1.8695	-205.623		-0.7085	-1.161	0	-1.87869		0	0	0	0	0	-149.102	-27.2198	-1171.59
																2094	28.2574	-551.148	-40.7597	-329.612	1.76168	55.0367	1.7615	0.000179491	-19.5948	-225.218	-17.7253	-0.7085	-1.161	0	-1.87869	0	0	0	0	0	0	-149.102	-30.3354	-1201.92
																2095	-23.3968	-574.545	23.2842	-306.327	2.58365e-05	55.0367	0	2.58365e-05	-1.8695	-227.087		-0.7085	-1.161	0	-1.87869		0	0	0	0	0	-149.102	-1.98206	-1203.9
																2096	-25.9644	-600.509	4.72222	-301.605	1.829e-05	55.0368	0	1.829e-05	-1.8695	-228.957		-0.7085	-1.161	0	-1.87869		0	0	0	0	0	-149.102	-23.1116	-1227.02
																2097	-28.1377	-628.647	4.44339	-297.162	1.29532e-05	55.0368	0	1.29532e-05	-1.8695	-230.826		-0.7085	-1.161	0	-1.87869		0	0	0	0	0	-149.102	-25.5638	-1252.58
																2098	-31.493	-660.14	4.23386	-292.928	9.17898e-06	55.0368	0	9.17898e-06	-1.8695	-232.696		-0.7085	-1.161	0	-1.87869		0	0	0	0	0	-149.102	-29.1286	-1281.71
																2099	-30.3066	-690.446	4.07344	-288.855	6.5097e-06	55.0368	0	6.5097e-06	-1.8695	-234.565		-0.7085	-1.161	0	-1.87869		0	0	0	0	0	-149.102	-28.1026	-1309.81
																2100	-30.9215	-721.368	3.94783	-284.907	4.62174e-06	55.0368	0	4.62174e-06	-1.8695	-236.435		-0.7085	-1.161	0	-1.87869		0	0	0	0	0	-149.102	-28.8432	-1338.65
																2101	-31.4525	-752.821	3.84689	-281.06	3.28627e-06	55.0368	0	3.28627e-06	-1.8695	-238.304		-0.7085	-1.161	0	-1.87869		0	0	0	0	0	-149.102	-29.4751	-1368.13
																2102	-31.9141	-784.735	3.76347	-277.296	2.3415e-06	55.0368	0	2.3415e-06	-1.8695	-240.174		-0.7085	-1.161	0	-1.87869		0	0	0	0	0	-149.102	-30.0201	-1398.15
																2103	-33.2832	-818.018	3.69248	-273.604	1.67301e-06	55.0368	0	1.67301e-06	-1.8695	-242.043		-0.7085	-1.161	0	-1.87869		0	0	0	0	0	-149.102	-31.4603	-1429.61
																2104	-33.6402	-851.658	3.63034	-269.974	1.19988e-06	55.0368	0	1.19988e-06	-1.8695	-243.913		-0.7085	-1.161	0	-1.87869		0	0	0	0	0	-149.102	-31.8794	-1461.49
																2105	-33.9547	-885.613	3.57451	-266.399	8.64922e-07	55.0368	0	8.64922e-07	-1.8695	-245.782		-0.7085	-1.161	0	-1.87869		0	0	0	0	0	-149.102	-32.2497	-1493.74
																2106	-34.2328	-919.846	3.52318	-262.876	6.2767e-07	55.0368	0	6.2767e-07	-1.8695	-247.652		-0.7085	-1.161	0	-1.87869		0	0	0	0	0	-149.102	-32.5791	-1526.32
																2107	-34.4797	-954.325	3.47509	-259.401	4.59522e-07	55.0368	0	4.59522e-07	-1.8695	-249.521		-0.7085	-1.161	0	-1.87869		0	0	0	0	0	-149.102	-32.8741	-1559.19
																2108	-33.3127	-987.638	3.42934	-255.971	3.40248e-07	55.0368	0	3.40248e-07	-1.8695	-251.391		-0.7085	-1.161	0	-1.87869		0	0	0	0	0	-149.102	-31.7528	-1590.94
																2109	-33.4991	-1021.14	3.38529	-252.586	2.55546e-07	55.0368	0	2.55546e-07	-1.8695	-253.26		-0.7085	-1.161	0	-1.87869		0	0	0	0	0	-149.102	-31.9833	-1622.93
																2110	-33.6674	-1054.8	3.34251	-249.244	1.95299e-07	55.0368	0	1.95299e-07	-1.8695	-255.13		-0.7085	-1.161	0	-1.87869		0	0	0	0	0	-149.102	-32.1944	-1655.12
																2111	-33.8194	-1088.62	3.30068	-245.943	1.52356e-07	55.0368	0	1.52356e-07	-1.8695	-256.999		-0.7085	-1.161	0	-1.87869		0	0	0	0	0	-149.102	-32.3882	-1687.51
																2112	-33.9572	-1122.58	3.25959	-242.683	1.21658e-07	55.0368	0	1.21658e-07	-1.8695	-258.869		-0.7085	-1.161	0	-1.87869		0	0	0	0	0	-149.102	-32.5671	-1720.08
																2113	-31.3998	-1153.98	3.21907	-239.464	9.96288e-08	55.0368	0	9.96288e-08	-1.8695	-260.738		-0.7085	-1.161	0	-1.87869		0	0	0	0	0	-149.102	-30.0502	-1750.13
																2114	-31.4856	-1185.47	3.17904	-236.285	8.37375e-08	55.0368	0	8.37375e-08	-1.8695	-262.608		-0.7085	-1.161	0	-1.87869		0	0	0	0	0	-149.102	-30.1761	-1780.3
																2115	-31.5679	-1217.03	3.13941	-233.146	7.21956e-08	55.0368	0	7.21956e-08	-1.8695	-264.477		-0.7085	-1.161	0	-1.87869		0	0	0	0	0	-149.102	-30.298	-1810.6
																2116	-31.646	-1248.68	3.10014	-230.046	6.37377e-08	55.0368	0	6.37377e-08	-1.8695	-266.347		-0.7085	-1.161	0	-1.87869		0	0	0	0	0	-149.102	-30.4154	-1841.02
																2117	-31.7194	-1280.4	3.06121	-226.984	5.74687e-08	55.0368	0	5.74687e-08	-1.8695	-268.216		-0.7085	-1.161	0	-1.87869		0	0	0	0	0	-149.102	-30.5277	-1871.54
																2118	-28.957	-1309.36	3.02258	-223.962	5.27554e-08	55.0368	0	5.27554e-08	-1.8695	-270.086		-0.7085	-1.161	0	-1.87869		0	0	0	0	0	-149.102	-27.8039	-1899.35
																2119	-28.9865	-1338.34	2.98425	-220.978	4.915e-08	55.0368	0	4.915e-08	-1.8695	-271.955		-0.7085	-1.161	0	-1.87869		0	0	0	0	0	-149.102	-27.8718	-1927.22
																2120	-29.0196	-1367.36	2.94622	-218.031	4.63353e-08	55.0368	0	4.63353e-08	-1.8695	-273.825		-0.7085	-1.161	0	-1.87869		0	0	0	0	0	-149.102	-27.9429	-1955.16

## Sheet: Yr5
																Summary of emissions discounts to apply (to 2020 assumptions):
																	2020-2029		2030-2039		2040-2049		2050-2084		2085-2120
																	Core	FA	Core	FA	Core	FA	Core	FA	Core	FA
																Avoided emissions - Biomass (heat) - marginal supply	none	none	none	none	none	0.25258	0.9	0.039435	0	0
																Avoided emissions - Biomass (electricity) - marginal supply	none	none	0.9127	0.5635	0.8254	0.127	0.5635	0	0.127	0
																Avoided emissions - Incineration (electricity) - marginal supply	none	none	0.9127	0.5635	0.8254	0.127	0.5635	0	0.127	0
																Incineration (heat) - marginal supply	none	none	none	none	none	0	0.9	0.136905	0	0
																C storage - BECCS (biomass electricity)	none	none	0.09	0.45	0.18	0.9	0.45	1	0.9	1
																C storage - BECCS (biomass heat)	none	none	0	0	0	0.405	0	0.81	0.405	0.9
																Avoided emissions - Cement production - CCS application (calcination)	n/a	n/a	n/a	n/a	n/a	n/a	none	0.45568	0.93952	0.3952
																Avoided emissions - Cement production - furnace emissions reduction	n/a	n/a	n/a	n/a	n/a	n/a	0.9784	0.95104	0.95104	0.712
																Emissions - Wood panel (particle board) production (CCS on heat production)	none	none	none	none	none	0.6355	none	0.271	0.6355	0.19
																Emissions - Harvester/forwarder	none	none	none	none	none	0.55	0.87	0.1	0	0
	Annual C stock - total ecosystem (tonnes C) - >75% thin									Natural Forest' C sequestration
	Time Step	Total Ecosystem(GH model (thinned) average soil v3 Default Simu			Thinned	Thinned	Thinned				'Total Ecosystem(Afforestation (conservation) Default Simulation					Core targets scenario
		Forest ecosystem	HWP total	Net system C	Mulch/S C storage	HWP primary	HWP secondary				Net ecosystem C	Process emissions	Annual C flux	Net cumulative C sequestration and storage			5th planting (Mg CO2 eq)																							Plantation (Core)
	Year	Tonnes C	Tonnes C		Tonnes C					Year	Tonnes C		Mg CO2eq			Year	Terrestrial C storage		HWP C storage		Forestry/ wood processing emissions (total)		Forestry/ primary wood processing emissions	Secondary wood processing emissions	(BE)CCS (total)		(BE)CCS (primary)	(BE)CCS (secondary)	(BE)CCS (tertiary)	FF offset (total)		Primary electricity offset (biomass + incineration)	Secondary electricity offset (biomass + incineration)	Tertiary electricity offset (biomass + incineration)	Heat offset (biomass)	Heat offset (incineration)	Concrete offset (net)		Net - annual flux	Net - cumulative C sequestration
																	Annual flux	Accumulation	Annual flux	Accumulation	Annual flux	Accumulation			Annual flux	Accumulation				Annual flux	Accumulation						Annual flux	Accumulation
	0	81	0	81	0	0	0			0						2020
	1	80.8365	0	80.8365		0	0			1						2021
	2	80.975	0	80.975		0	0			2						2022
	3	81.5	0	81.5		0	0			3						2023
	4	82.4699	0	82.4699		0	0			4	81	1.36461	5.00358	5.00358		2024	0	0	0	0	5.00358	5.00358	5.00358	0	0	0	0	0	0	0	0	0	0	0	0	0	0	0	5.00358	5.00358
	5	83.9295	0	83.9295		0	0			5	80.8429		0.575894	5.57947		2025	0.599623	0.599623	0	0	0	5.00358	0	0	0	0	0	0	0	0	0	0	0	0	0	0	0	0	0.599623	5.6032
	6	85.9132	0	85.9132		0	0			6	80.9424		-0.36473	5.21474		2026	-0.507923	0.0917007	0	0	0	5.00358	0	0	0	0	0	0	0	0	0	0	0	0	0	0	0	0	-0.507923	5.09528
	7	88.4465	0	88.4465		0	0			7	81.3393		-1.45544	3.7593		2027	-1.92493	-1.83323	0	0	0	5.00358	0	0	0	0	0	0	0	0	0	0	0	0	0	0	0	0	-1.92493	3.17035
	8	91.5466	0	91.5466		0	0			8	82.0617		-2.64872	1.11058		2028	-3.55635	-5.38958	0	0	0	5.00358	0	0	0	0	0	0	0	0	0	0	0	0	0	0	0	0	-3.55635	-0.386001
	9	95.2236	0	95.2236		0	0			9	83.1297		-3.91591	-2.80532		2029	-5.35193	-10.7415	0	0	0	5.00358	0	0	0	0	0	0	0	0	0	0	0	0	0	0	0	0	-5.35193	-5.73793
	10	99.4808	0	99.4808		0	0			10	84.5573		-5.23457	-8.03989		2030	-7.27359	-18.0151	0	0	0	5.00358	0	0	0	0	0	0	0	0	0	0	0	0	0	0	0	0	-7.27359	-13.0115
	11	104.315	0	104.315		0	0			11	86.3534		-6.58557	-14.6255		2031	-9.28859	-27.3037	0	0	0	5.00358	0	0	0	0	0	0	0	0	0	0	0	0	0	0	0	0	-9.28859	-22.3001
	12	109.719	0	109.719		0	0			12	88.5221		-7.95205	-22.5775		2032	-11.3672	-38.6709	0	0	0	5.00358	0	0	0	0	0	0	0	0	0	0	0	0	0	0	0	0	-11.3672	-33.6673
	13	115.68	0	115.68		0	0			13	91.0637		-9.31896	-31.8965		2033	-13.4824	-52.1533	0	0	0	5.00358	0	0	0	0	0	0	0	0	0	0	0	0	0	0	0	0	-13.4824	-47.1497
	14	122.183	0	122.183		0	0			14	93.9745		-10.673	-42.5695		2034	-15.6095	-67.7629	0	0	0	5.00358	0	0	0	0	0	0	0	0	0	0	0	0	0	0	0	0	-15.6095	-62.7593
	15	129.207	0	129.207		0	0			15	97.2478		-12.0023	-54.5718		2035	-17.7267	-85.4896	0	0	0	5.00358	0	0	0	0	0	0	0	0	0	0	0	0	0	0	0	0	-17.7267	-80.486
	16	136.731	0	136.731		0	0			16	100.874		-13.2969	-67.8687		2036	-19.8148	-105.304	0	0	0	5.00358	0	0	0	0	0	0	0	0	0	0	0	0	0	0	0	0	-19.8148	-100.301
	17	144.732	0	144.732		0	0			17	104.842		-14.548	-82.4167		2037	-21.8574	-127.162	0	0	0	5.00358	0	0	0	0	0	0	0	0	0	0	0	0	0	0	0	0	-21.8574	-122.158
	18	153.185	0	153.185		0	0			18	109.137		-15.7483	-98.165		2038	-23.8412	-151.003	0	0	0	5.00358	0	0	0	0	0	0	0	0	0	0	0	0	0	0	0	0	-23.8412	-145.999
	19	162.063	0	162.063		0	0			19	113.744		-16.8918	-115.057		2039	-25.7549	-176.758	0	0	0	5.00358	0	0	0	0	0	0	0	0	0	0	0	0	0	0	0	0	-25.7549	-171.754
	20	171.337	0	171.337		0	0			20	118.646		-17.9733	-133.03		2040	-27.5896	-204.347	0	0	0	5.00358	0	0	0	0	0	0	0	0	0	0	0	0	0	0	0	0	-27.5896	-199.344
	21	166.535	6.76672	173.301	0.415937	6.35078	0			21	123.824		-18.9887	-152.019		2041	-29.338	-233.685	0	0	0	5.00358	0	0	0	0	0	0	0	0	0	0	0	0	0	0	0	0	-29.338	-228.682
	22	174.253	6.00167	180.255		5.40511	0.596564			22	129.261		-19.9347	-171.953		2042	-30.9935	-264.679	0	0	0	5.00358	0	0	0	0	0	0	0	0	0	0	0	0	0	0	0	0	-30.9935	-259.675
	23	182.581	5.73256	188.313		4.71306	1.01951			23	134.936		-20.8082	-192.762		2043	-32.5507	-297.23	0	0	0	5.00358	0	0	0	0	0	0	0	0	0	0	0	0	0	0	0	0	-32.5507	-292.226
	24	191.425	5.52023	196.945		4.20096	1.31927			24	138.961		-14.7598	-207.521		2044	-34.0044	-331.234	0	0	0	5.00358	0	0	0	0	0	0	0	0	0	0	0	0	0	0	0	0	-34.0044	-326.23
	25	200.704	5.34825	206.052		3.81671	1.53154			25	143.702		-17.382	-224.903		2045	17.6073	-313.627	-24.8113	-24.8113	8.32153	13.3251	8.32153	0	-3.1732	-3.1732	-2.83669	-0.12753	-0.20898	-5.08575	-5.08575	-5.08575	0	0	0	0	0	0	-7.14141	-333.372
	26	210.764	5.20501	215.969		3.52345	1.68155			26	148.506		-17.6139	-242.517		2046	-28.3006	-341.927	2.80517	-22.0061	3.74541e-07	13.3251	0	3.74541e-07	-0.33651	-3.50971		-0.12753	-0.20898	-1.47255	-6.5583	0	-0.219732	-1.25282	0	0	0	0	-27.3045	-360.676
	27	220.383	5.0823	225.465		3.2951	1.7872			27	153.352		-17.7693	-260.287		2047	-30.5355	-372.463	0.986722	-21.0194	2.74092e-07	13.3251	0	2.74092e-07	-0.33651	-3.84622		-0.12753	-0.20898	-1.41362	-7.97192	0	-0.160801	-1.25282	0	0	0	0	-31.2989	-391.975
	28	230.067	4.97433	235.041		3.11319	1.86114			28	159.692		-23.2471	-283.534		2048	-32.4275	-404.89	0.778555	-20.2408	2.0282e-07	13.3251	0	2.0282e-07	-0.33651	-4.18273		-0.12753	-0.20898	-1.37181	-9.34373	0	-0.118988	-1.25282	0	0	0	0	-33.3572	-425.332
	29	239.806	4.87699	244.683		2.96466	1.91232			29	165.832		-22.5139	-306.048		2049	-34.0251	-438.915	0.630603	-19.6102	1.52184e-07	13.3251	0	1.52184e-07	-0.33651	-4.51924		-0.12753	-0.20898	-1.3421	-10.6858	0	-0.0892818	-1.25282	0	0	0	0	-35.0731	-460.406
	30	249.591	4.78739	254.378		2.84026	1.94712			30	175.455		-35.2823	-341.33		2050	-36.8851	-475.8	0.52522	-19.085	1.16148e-07	13.3251	0	1.16148e-07	-0.841274	-5.36051		-0.318825	-0.522449	-0.901818	-11.5876	0	-0.0465195	-0.855299	0	0	0	0	-38.103	-498.509
	31	259.679	4.70348	264.382		2.73343	1.97004			31	184.967		-34.8791	-376.209		2051	-35.2691	-511.07	0.449927	-18.6351	9.04419e-08	13.3251	0	9.04419e-08	-0.841274	-6.20179		-0.318825	-0.522449	-0.891522	-12.4792	0	-0.0362236	-0.855299	0	0	0	0	-36.5519	-535.06
	32	269.8	4.62381	274.424		2.63952	1.98429			32	194.39		-34.5515	-410.761		2052	-35.5086	-546.578	0.395902	-18.2392	7.20458e-08	13.3251	0	7.20458e-08	-0.841274	-7.04306		-0.318825	-0.522449	-0.884154	-13.3633	0	-0.0288557	-0.855299	0	0	0	0	-36.8381	-571.899
	33	279.952	4.54737	284.499		2.55523	1.99214			33	203.739		-34.2804	-445.041		2053	-35.7094	-582.288	0.356909	-17.8823	5.88248e-08	13.3251	0	5.88248e-08	-0.841274	-7.88434		-0.318825	-0.522449	-0.878859	-14.2422	0	-0.0235604	-0.855299	0	0	0	0	-37.0726	-608.971
	34	290.127	4.47343	294.601		2.4782	1.99523			34	213.027		-34.0532	-479.094		2054	-35.8788	-618.166	0.328537	-17.5537	4.92691e-08	13.3251	0	4.92691e-08	-0.841274	-8.72561		-0.318825	-0.522449	-0.875032	-15.1172	0	-0.0197332	-0.855299	0	0	0	0	-37.2665	-646.238
	35	300.325	4.40149	304.726		2.40676	1.99473			35	219.105		-22.2888	-501.383		2055	-36.9884	-655.155	0.30767	-17.2461	4.23108e-08	13.3251	0	4.23108e-08	-0.841274	-9.56688		-0.318825	-0.522449	-0.872245	-15.9895	0	-0.0169462	-0.855299	0	0	0	0	-38.3942	-684.632
	36	310.163	4.33118	314.494		2.33973	1.99146			36	225.133		-22.1014	-523.484		2056	-37.1136	-692.268	0.292104	-16.954	3.71945e-08	13.3251	0	3.71945e-08	-0.841274	-10.4082		-0.318825	-0.522449	-0.870196	-16.8597	0	-0.0148971	-0.855299	0	0	0	0	-38.533	-723.165
	37	320.013	4.26226	324.276		2.27624	1.98602			37	231.118		-21.9445	-545.429		2057	-37.2206	-729.489	0.280281	-16.6737	3.33861e-08	13.3251	0	3.33861e-08	-0.841274	-11.2494		-0.318825	-0.522449	-0.868671	-17.7283	0	-0.0133718	-0.855299	0	0	0	0	-38.6502	-761.815
	38	329.876	4.19454	334.07		2.21567	1.97887			38	237.067		-21.8117	-567.241		2058	-37.312	-766.801	0.271101	-16.4026	3.05077e-08	13.3251	0	3.05077e-08	-0.841274	-12.0907		-0.318825	-0.522449	-0.867518	-18.5958	0	-0.0122189	-0.855299	0	0	0	0	-38.7497	-800.565
	39	339.748	4.1279	343.876		2.15757	1.97032			39	242.985		-21.699	-588.94		2059	-37.3905	-804.191	0.263788	-16.1388	2.8292e-08	13.3251	0	2.8292e-08	-0.841274	-12.932		-0.318825	-0.522449	-0.86663	-19.4625	0	-0.0113315	-0.855299	0	0	0	0	-38.8346	-839.399
	40	349.63	4.06224	353.692		2.10163	1.96061			40	248.464		-20.0901	-609.03		2060	-36.0712	-840.263	0.257791	-15.881	2.65498e-08	13.3251	0	2.65498e-08	-0.841274	-13.7733		-0.318825	-0.522449	-0.865932	-20.3284	0	-0.0106337	-0.855299	0	0	0	0	-37.5206	-876.92
	41	358.788	3.99751	362.786		2.04758	1.94993			41	253.915		-19.989	-629.019		2061	-36.1194	-876.382	0.252723	-15.6283	2.51471e-08	13.3251	0	2.51471e-08	-0.841274	-14.6145		-0.318825	-0.522449	-0.865371	-21.1938	0	-0.0100719	-0.855299	0	0	0	0	-37.5733	-914.493
	42	367.946	3.93366	371.879		1.99526	1.93839			42	259.343		-19.9032	-648.922		2062	-36.1622	-912.544	0.24831	-15.38	2.39891e-08	13.3251	0	2.39891e-08	-0.841274	-15.4558		-0.318825	-0.522449	-0.864907	-22.0587	0	-0.00960808	-0.855299	0	0	0	0	-37.62	-952.113
	43	377.104	3.87066	380.974		1.94453	1.92613			43	264.751		-19.8296	-668.752		2063	-36.1997	-948.744	0.244361	-15.1356	2.30087e-08	13.3251	0	2.30087e-08	-0.841274	-16.2971		-0.318825	-0.522449	-0.864514	-22.9232	0	-0.00921539	-0.855299	0	0	0	0	-37.6611	-989.775
	44	386.263	3.80848	390.071		1.89527	1.91321			44	270.142		-19.7665	-688.518		2064	-36.2329	-984.977	0.240738	-14.8949	2.21581e-08	13.3251	0	2.21581e-08	-0.841274	-17.1383		-0.318825	-0.522449	-0.864174	-23.7874	0	-0.00887474	-0.855299	0	0	0	0	-37.6976	-1027.47
	45	395.423	3.74711	399.17		1.8474	1.89971			45	275.112		-18.2224	-706.74		2065	-33.5798	-1018.56	0.237346	-14.6575	2.14037e-08	13.3251	0	2.14037e-08	-0.841274	-17.9796		-0.318825	-0.522449	-0.863871	-24.6512	0	-0.00857257	-0.855299	0	0	0	0	-35.0476	-1062.52
	46	403.812	3.68654	407.499		1.80085	1.88568			46	280.063		-18.1553	-724.896		2066	-33.5776	-1052.13	0.234119	-14.4234	2.07213e-08	13.3251	0	2.07213e-08	-0.841274	-18.8209		-0.318825	-0.522449	-0.863598	-25.5148	0	-0.00829928	-0.855299	0	0	0	0	-35.0484	-1097.57
	47	412.194	3.62675	415.82		1.75557	1.87118			47	284.999		-18.0982	-742.994		2067	-33.5792	-1085.71	0.231009	-14.1924	2.0094e-08	13.3251	0	2.0094e-08	-0.841274	-19.6622		-0.318825	-0.522449	-0.863347	-26.3782	0	-0.00804801	-0.855299	0	0	0	0	-35.0529	-1132.62
	48	420.569	3.56774	424.137		1.71149	1.85625			48	289.924		-18.0569	-761.051		2068	-33.5828	-1119.3	0.227984	-13.9644	1.95094e-08	13.3251	0	1.95094e-08	-0.841274	-20.5034		-0.318825	-0.522449	-0.863113	-27.2413	0	-0.00781386	-0.855299	0	0	0	0	-35.0592	-1167.68
	49	428.94	3.5095	432.45		1.66858	1.84092			49	294.838		-18.0171	-779.068		2069	-33.5875	-1152.88	0.22502	-13.7394	1.89588e-08	13.3251	0	1.89588e-08	-0.841274	-21.3447		-0.318825	-0.522449	-0.862892	-28.1042	0	-0.00759335	-0.855299	0	0	0	0	-35.0667	-1202.75
	50	250.406	117.514	367.92	8.22192	107.466	1.82594			50	299.396		-16.7129	-795.781		2070	-30.7614	-1183.65	0.222103	-13.5173	1.8436e-08	13.3251	0	1.8436e-08	-0.841274	-22.186		-0.318825	-0.522449	-0.862683	-28.9669	0	-0.00738395	-0.855299	0	0	0	0	-32.2433	-1234.99
	51	235.471	107.841	343.312		98.6261	9.21454			51	303.94		-16.6615	-812.442		2071	-30.732	-1214.38	0.219221	-13.2981	1.79364e-08	13.3251	0	1.79364e-08	-0.841274	-23.0273		-0.318825	-0.522449	-0.862483	-29.8294	0	-0.00718385	-0.855299	0	0	0	0	-32.2165	-1267.21
	52	223.192	104.754	327.947		91.5144	13.2401			52	308.472		-16.6177	-829.06		2072	-30.7102	-1245.09	0.216367	-13.0817	1.74566e-08	13.3251	0	1.74566e-08	-0.841274	-23.8685		-0.318825	-0.522449	-0.862291	-30.6916	0	-0.00699171	-0.855299	0	0	0	0	-32.1974	-1299.4
	53	213.194	102.116	315.311		85.7258	16.3903			53	312.994		-16.5804	-845.64		2073	-30.6944	-1275.78	0.213536	-12.8682	1.69943e-08	13.3251	0	1.69943e-08	-0.841274	-24.7098		-0.318825	-0.522449	-0.862105	-31.5538	0	-0.00680655	-0.855299	0	0	0	0	-32.1842	-1331.59
	54	205.188	99.8243	305.012		80.9551	18.8692			54	317.507		-16.5483	-862.189		2074	654.627	-621.154	-418.017	-430.885	158.643	171.968	158.643	1.69943e-08	-45.4301	-70.1399	-44.5888	-0.318825	-0.522449	-23.1934	-54.7471	-22.2718	-0.00680655	-0.855299	0	-0.0594749	-336.622	-336.622	-9.9919	-1341.58
	55	198.944	97.8011	296.745		76.9713	20.8298			55	321.752		-15.5635	-877.752		2075	54.7601	-566.394	35.4692	-395.416	0.195766	172.164	0	0.195766	-0.841274	-70.9812		-0.318825	-0.522449	-2.21013	-56.9573		-1.29535	-0.855299	0	-0.0594749	0	-336.622	87.3737	-1254.21
	56	194.283	95.9867	290.27		73.5991	22.3876			56	325.986		-15.5257	-893.278		2076	45.0223	-521.372	11.316	-384.1	0.138427	172.302	0	0.138427	-0.841274	-71.8224		-0.318825	-0.522449	-1.96728	-58.9246		-1.0525	-0.855299	0	-0.0594749	0	-336.622	53.6681	-1200.54
	57	191.057	94.3353	285.392		70.7051	23.6301			57	330.211		-15.4932	-908.771		2077	36.6589	-484.713	9.67397	-374.426	0.097883	172.4	0	0.097883	-0.841274	-72.6637		-0.318825	-0.522449	-1.77953	-60.7041		-0.864758	-0.855299	0	-0.0594749	0	-336.622	43.8099	-1156.73
	58	189.141	92.8114	281.952		68.1873	24.6241			58	334.429		-15.4652	-924.236		2078	29.3588	-455.354	8.40341	-366.022	0.069214	172.469	0	0.069214	-0.841274	-73.505		-0.318825	-0.522449	-1.63374	-62.3378		-0.718961	-0.855299	0	-0.0594749	0	-336.622	35.3565	-1121.37
	59	188.431	91.388	279.819		65.9673	25.4208			59	338.64		-15.441	-939.677		2079	22.8921	-432.462	7.41837	-358.604	0.0489419	172.518	0	0.0489419	-0.841274	-74.3462		-0.318825	-0.522449	-1.51998	-63.8578		-0.60521	-0.855299	0	-0.0594749	0	-336.622	27.9982	-1093.37
	60	188.835	90.0444	278.88		63.9849	26.0595			60	342.529		-14.2596	-953.937		2080	17.0904	-415.372	6.65266	-351.951	0.0346074	172.553	0	0.0346074	-0.841274	-75.1875		-0.318825	-0.522449	-1.43079	-65.2886		-0.516016	-0.855299	0	-0.0594749	0	-336.622	21.5057	-1071.87
	61	190.272	88.7644	279.036		62.1935	26.5709			61	346.407		-14.2193	-968.156		2081	11.8309	-403.541	6.05542	-345.896	0.0244713	172.577	0	0.0244713	-0.841274	-76.0288		-0.318825	-0.522449	-1.36048	-66.6491		-0.445704	-0.855299	0	-0.0594749	0	-336.622	15.7091	-1056.16
	62	192.666	87.5359	280.202		60.5572	26.9787			62	350.276		-14.1847	-982.341		2082	7.02363	-396.517	5.58754	-340.308	0.017304	172.594	0	0.017304	-0.841274	-76.8701		-0.318825	-0.522449	-1.30473	-67.9538		-0.389954	-0.855299	0	-0.0594749	0	-336.622	10.4825	-1045.68
	63	195.951	86.3493	282.3		59.0477	27.3016			63	354.136		-14.1547	-996.496		2083	2.60238	-393.915	5.219	-335.089	0.012236	172.607	0	0.012236	-0.841274	-77.7113		-0.318825	-0.522449	-1.26025	-69.214		-0.345474	-0.855299	0	-0.0594749	0	-336.622	5.7321	-1039.94
	64	200.063	85.1975	285.26		57.6432	27.5543			64	358.007		-14.1943	-1010.69		2084	-1.48191	-395.397	4.92676	-330.163	0.0086523	172.615	0	0.0086523	-0.841274	-78.5526		-0.318825	-0.522449	-1.22451	-70.4386		-0.309739	-0.855299	0	-0.0594749	0	-336.622	1.38771	-1038.56
	65	204.944	84.0748	289.018		56.3264	27.7484			65	361.578		-13.0916	-1023.78		2085	-5.26639	-400.663	4.69314	-325.469	0.00388815	172.619	0	0.00388815	-1.68255	-80.2352		-0.63765	-1.0449	-0.256054	-70.6946		-0.0632891	-0.192765	0	0	0	-336.622	-2.50796	-1041.06
	66	210.537	82.977	293.514		55.0837	27.8932			66	365.139		-13.0578	-1036.84		2086	-8.77949	-409.443	4.50457	-320.965	0.00274943	172.622	0	0.00274943	-1.68255	-81.9177		-0.63765	-1.0449	-0.250734	-70.9453		-0.0579691	-0.192765	0	0	0	-336.622	-6.20545	-1047.27
	67	216.792	81.9006	298.692		53.9045	27.996			67	368.692		-13.0286	-1049.87		2087	-12.0439	-421.486	4.35064	-316.614	0.00194423	172.624	0	0.00194423	-1.68255	-83.6003		-0.63765	-1.0449	-0.246353	-71.1917		-0.0535887	-0.192765	0	0	0	-336.622	-9.62024	-1056.89
	68	223.656	80.8432	304.499		52.7802	28.0629			68	372.239		-13.0033	-1062.87		2088	-15.0777	-436.564	4.22335	-312.391	0.00137486	172.625	0	0.00137486	-1.68255	-85.2828		-0.63765	-1.0449	-0.242712	-71.4344		-0.0499472	-0.192765	0	0	0	-336.622	-12.7783	-1069.67
	69	231.081	79.8027	310.884		51.704	28.0988			69	375.779		-12.9809	-1075.85		2089	-17.8959	-454.46	4.11656	-308.274	0.000972256	172.626	0	0.000972256	-1.68255	-86.9654		-0.63765	-1.0449	-0.239654	-71.6741		-0.0468889	-0.192765	0	0	0	-336.622	-15.7006	-1085.37
	70	239.02	78.7778	317.797		50.6703	28.1075			70	378.979		-11.733	-1087.59		2090	-20.5107	-474.971	4.02554	-304.249	0.000687568	172.627	0	0.000687568	-1.68255	-88.6479		-0.63765	-1.0449	-0.237057	-71.9111		-0.0442926	-0.192765	0	0	0	-336.622	-18.4041	-1103.77
	71	231.313	89.8941	321.207	4.95963	56.8177	28.1167			71	382.167		-11.6891	-1099.27		2091	-22.9322	-497.903	3.94668	-300.302	0.000486259	172.627	0	0.000486259	-1.68255	-90.3305		-0.63765	-1.0449	-0.234829	-72.1459		-0.042064	-0.192765	0	0	0	-336.622	-20.9024	-1124.68
	72	237.694	83.5438	321.238		54.793	28.7508			72	385.344		-11.6509	-1110.93		2092	-25.1684	-523.071	3.87718	-296.425	0.00034391	172.628	0	0.00034391	-1.68255	-92.013		-0.63765	-1.0449	-0.232894	-72.3788		-0.0401291	-0.192765	0	0	0	-336.622	-23.2063	-1147.88
	73	244.775	82.256	327.031		53.0851	29.1708			73	388.513		-11.6174	-1122.54		2093	-27.2256	-550.297	3.8149	-292.61	0.000243252	172.628	0	0.000243252	-1.68255	-93.6955		-0.63765	-1.0449	-0.231195	-72.61		-0.0384303	-0.192765	0	0	0	-336.622	-25.3242	-1173.21
	74	252.449	81.0441	333.493		51.6087	29.4354			74	391.673		-11.5877	-1134.13		2094	-29.1086	-579.405	3.75818	-288.852	0.000172074	172.628	0	0.000172074	-1.68255	-95.3781		-0.63765	-1.0449	-0.229687	-72.8397		-0.036922	-0.192765	0	0	0	-336.622	-27.2625	-1200.47
	75	261.038	79.8894	340.928		50.303	29.5864			75	394.647		-10.9046	-1145.03		2095	28.2574	-551.148	-40.7597	-329.612	5.89236	178.521	5.89176	0.000600351	-17.6353	-113.013	-15.9528	-0.63765	-1.0449	-0.853094	-73.6928	-0.880131	0.219802	-0.192765	0	0	0	-336.622	-25.0983	-1225.57
	76	269.304	78.7785	348.082		49.1249	29.6536			76	397.611		-10.8671	-1155.9		2096	-23.3968	-574.545	23.2842	-306.327	8.64165e-05	178.521	0	8.64165e-05	-1.68255	-114.696		-0.63765	-1.0449	-0.265133	-73.958		-0.0723685	-0.192765	0	0	0	-336.622	-2.06018	-1227.63
	77	277.737	77.7018	355.439		48.0436	29.6582			77	400.565		-10.8334	-1166.74		2097	-25.9644	-600.509	4.72222	-301.605	6.11752e-05	178.521	0	6.11752e-05	-1.68255	-116.378		-0.63765	-1.0449	-0.253813	-74.2118		-0.0610481	-0.192765	0	0	0	-336.622	-23.1785	-1250.81
	78	286.315	76.6527	362.967		47.0369	29.6157			78	403.511		-10.8033	-1177.54		2098	-28.1377	-628.647	4.44339	-297.162	4.3325e-05	178.521	0	4.3325e-05	-1.68255	-118.061		-0.63765	-1.0449	-0.245542	-74.4573		-0.0527767	-0.192765	0	0	0	-336.622	-25.6224	-1276.43
	79	295.019	75.6263	370.645		46.0892	29.5371			79	406.45		-10.776	-1188.31		2099	-31.493	-660.14	4.23386	-292.928	3.07013e-05	178.521	0	3.07013e-05	-1.68255	-119.744		-0.63765	-1.0449	-0.239438	-74.6967		-0.0466735	-0.192765	0	0	0	-336.622	-29.1811	-1305.61
	80	304.096	74.6192	378.715		45.189	29.4303			80	408.192		-6.38738	-1194.7		2100	-30.3066	-690.446	4.07344	-288.855	2.17732e-05	178.521	0	2.17732e-05	-1.68255	-121.426		-0.63765	-1.0449	-0.234879	-74.9316		-0.0421142	-0.192765	0	0	0	-336.622	-28.1506	-1333.76
	81	313.27	73.6291	386.9		44.328	29.3012			81	409.898		-6.2551	-1200.96		2101	-30.9215	-721.368	3.94783	-284.907	1.54585e-05	178.521	0	1.54585e-05	-1.68255	-123.109		-0.63765	-1.0449	-0.231421	-75.163		-0.0386563	-0.192765	0	0	0	-336.622	-28.8876	-1362.65
	82	322.531	72.6543	395.185		43.5002	29.1541			82	411.573		-6.13887	-1207.1		2102	-31.4525	-752.821	3.84689	-281.06	1.09917e-05	178.521	0	1.09917e-05	-1.68255	-124.791		-0.63765	-1.0449	-0.228751	-75.3918		-0.0359863	-0.192765	0	0	0	-336.622	-29.5169	-1392.16
	83	331.867	71.6934	403.56		42.7012	28.9922			83	413.219		-6.03548	-1213.13		2103	-31.9141	-784.735	3.76347	-277.296	7.83171e-06	178.521	0	7.83171e-06	-1.68255	-126.474		-0.63765	-1.0449	-0.226646	-75.6184		-0.0338814	-0.192765	0	0	0	-336.622	-30.0598	-1422.22
	84	341.271	70.7457	412.016		41.9277	28.8179			84	414.839		-5.94241	-1219.07		2104	-33.2832	-818.018	3.69248	-273.604	5.59576e-06	178.521	0	5.59576e-06	-1.68255	-128.156		-0.63765	-1.0449	-0.224948	-75.8434		-0.0321837	-0.192765	0	0	0	-336.622	-31.4983	-1453.72
	85	350.356	69.8104	420.166		41.1772	28.6332			85	416.17		-4.88069	-1223.95		2105	-33.6402	-851.658	3.63034	-269.974	4.01329e-06	178.521	0	4.01329e-06	-1.68255	-129.839		-0.63765	-1.0449	-0.223546	-76.0669		-0.0307811	-0.192765	0	0	0	-336.622	-31.916	-1485.64
	86	359.492	68.8871	428.379		40.4478	28.4393			86	417.475		-4.78507	-1228.74		2106	-33.9547	-885.613	3.57451	-266.399	2.89294e-06	178.521	0	2.89294e-06	-1.68255	-131.521		-0.63765	-1.0449	-0.222358	-76.2893		-0.0295936	-0.192765	0	0	0	-336.622	-32.2851	-1517.92
	87	368.674	67.9755	436.649		39.738	28.2375			87	418.757		-4.69816	-1233.44		2107	-34.2328	-919.846	3.52318	-262.876	2.09939e-06	178.521	0	2.09939e-06	-1.68255	-133.204		-0.63765	-1.0449	-0.221329	-76.5106		-0.0285645	-0.192765	0	0	0	-336.622	-32.6135	-1550.54
	88	377.897	67.0753	444.973		39.0466	28.0287			88	420.016		-4.61831	-1238.06		2108	-34.4797	-954.325	3.47509	-259.401	1.53698e-06	178.521	0	1.53698e-06	-1.68255	-134.887		-0.63765	-1.0449	-0.220418	-76.731		-0.0276532	-0.192765	0	0	0	-336.622	-32.9076	-1583.44
	89	387.158	66.1864	453.345		38.3727	27.8137			89	421.256		-4.54422	-1242.6		2109	-33.3127	-987.638	3.42934	-255.971	1.13804e-06	178.521	0	1.13804e-06	-1.68255	-136.569		-0.63765	-1.0449	-0.219596	-76.9506		-0.0268309	-0.192765	0	0	0	-336.622	-31.7855	-1615.23
	90	395.722	65.3084	461.03		37.7154	27.5931			90	422.476		-4.47498	-1247.08		2110	-33.4991	-1021.14	3.38529	-252.586	8.54733e-07	178.521	0	8.54733e-07	-1.68255	-138.252		-0.63765	-1.0449	-0.218842	-77.1695		-0.0260768	-0.192765	0	0	0	-336.622	-32.0152	-1647.25
	91	404.309	64.4414	468.75		37.074	27.3675			91	423.679		-4.40976	-1251.48		2111	-33.6674	-1054.8	3.34251	-249.244	6.53225e-07	178.521	0	6.53225e-07	-1.68255	-139.934		-0.63765	-1.0449	-0.218141	-77.3876		-0.025376	-0.192765	0	0	0	-336.622	-32.2256	-1679.47
	92	412.918	63.5852	476.504		36.4479	27.1373			92	424.864		-4.34804	-1255.83		2112	-33.8194	-1088.62	3.30068	-245.943	5.09592e-07	178.521	0	5.09592e-07	-1.68255	-141.617		-0.63765	-1.0449	-0.217483	-77.6051		-0.0247178	-0.192765	0	0	0	-336.622	-32.4187	-1711.89
	93	421.549	62.7397	484.289		35.8366	26.9032			93	426.034		-4.28925	-1260.12		2113	-33.9572	-1122.58	3.25959	-242.683	4.06915e-07	178.521	0	4.06915e-07	-1.68255	-143.299		-0.63765	-1.0449	-0.216859	-77.822		-0.0240944	-0.192765	0	0	0	-336.622	-32.597	-1744.49
	94	430.2	61.9048	492.105		35.2395	26.6653			94	427.189		-4.23307	-1264.36		2114	-31.3998	-1153.98	3.21907	-239.464	3.33232e-07	178.521	0	3.33232e-07	-1.68255	-144.982		-0.63765	-1.0449	-0.216265	-78.0382		-0.0235001	-0.192765	0	0	0	-336.622	-30.0795	-1774.57
	95	438.097	61.0805	499.178		34.6563	26.4242			95	428.329		-4.1791	-1268.53		2115	-31.4856	-1185.47	3.17904	-236.285	2.8008e-07	178.521	0	2.8008e-07	-1.68255	-146.664		-0.63765	-1.0449	-0.215696	-78.2539		-0.0229308	-0.192765	0	0	0	-336.622	-30.2048	-1804.77
	96	446.003	60.2666	506.269		34.0865	26.1801			96	429.454		-4.12711	-1272.66		2116	-31.5679	-1217.03	3.13941	-233.146	2.41475e-07	178.521	0	2.41475e-07	-1.68255	-148.347		-0.63765	-1.0449	-0.215148	-78.4691		-0.0223832	-0.192765	0	0	0	-336.622	-30.3262	-1835.1
	97	453.917	59.4631	513.38		33.5297	25.9334			97	430.566		-4.07697	-1276.74		2117	-31.646	-1248.68	3.10014	-230.046	2.13186e-07	178.521	0	2.13186e-07	-1.68255	-150.029		-0.63765	-1.0449	-0.21462	-78.6837		-0.0218552	-0.192765	0	0	0	-336.622	-30.443	-1865.54
	98	461.841	58.6699	520.511		32.9855	25.6844			98	431.665		-4.02836	-1280.77		2118	-31.7194	-1280.4	3.06121	-226.984	1.92218e-07	178.521	0	1.92218e-07	-1.68255	-151.712		-0.63765	-1.0449	-0.21411	-78.8978		-0.0213448	-0.192765	0	0	0	-336.622	-30.5549	-1896.09
	99	469.775	57.8869	527.662		32.4535	25.4334			99	432.75		-3.98124	-1284.75		2119	-28.957	-1309.36	3.02258	-223.962	1.76453e-07	178.521	0	1.76453e-07	-1.68255	-153.395		-0.63765	-1.0449	-0.213615	-79.1114		-0.0208507	-0.192765	0	0	0	-336.622	-27.8306	-1923.93
	100	288.179	177.741	465.92	10.907	139.448	27.3859			100	433.824		-3.93546	-1288.68		2120	-28.9865	-1338.34	2.98425	-220.978	1.64394e-07	178.521	0	1.64394e-07	-1.68255	-155.077		-0.63765	-1.0449	-0.213136	-79.3246		-0.0203717	-0.192765	0	0	0	-336.622	-27.898	-1951.82
																Further Ambition targets scenario
																	5th planting (Mg CO2 eq)																							Plantation (Core)
																Year	Terrestrial C storage		HWP C storage		Forestry/ wood processing emissions (total)		Forestry/ primary wood processing emissions	Secondary wood processing emissions	(BE)CCS (total)		(BE)CCS (primary)	(BE)CCS (secondary)	(BE)CCS (tertiary)	FF offset (total)		Primary electricity offset (biomass + incineration)	Secondary electricity offset (biomass + incineration)	Tertiary electricity offset (biomass + incineration)	Heat offset (biomass)	Heat offset (incineration)	Concrete offset (net)		Net - annual flux	Net - cumulative C sequestration
																	Annual flux	Accumulation	Annual flux	Accumulation	Annual flux	Accumulation			Annual flux	Accumulation				Annual flux	Accumulation						Annual flux	Accumulation
																2020
																2021
																2022
																2023
																2024	0	0	0	0	5.00358	5.00358	5.00358	0	0	0	0	0	0	0	0	0	0	0	0	0	0	0	5.00358	5.00358
																2025	0.599623	0.599623	0	0	0	5.00358	0	0	0	0	0	0	0	0	0	0	0	0	0	0	0	0	0.599623	5.6032
																2026	-0.507923	0.0917007	0	0	0	5.00358	0	0	0	0	0	0	0	0	0	0	0	0	0	0	0	0	-0.507923	5.09528
																2027	-1.92493	-1.83323	0	0	0	5.00358	0	0	0	0	0	0	0	0	0	0	0	0	0	0	0	0	-1.92493	3.17035
																2028	-3.55635	-5.38958	0	0	0	5.00358	0	0	0	0	0	0	0	0	0	0	0	0	0	0	0	0	-3.55635	-0.386001
																2029	-5.35193	-10.7415	0	0	0	5.00358	0	0	0	0	0	0	0	0	0	0	0	0	0	0	0	0	-5.35193	-5.73793
																2030	-7.27359	-18.0151	0	0	0	5.00358	0	0	0	0	0	0	0	0	0	0	0	0	0	0	0	0	-7.27359	-13.0115
																2031	-9.28859	-27.3037	0	0	0	5.00358	0	0	0	0	0	0	0	0	0	0	0	0	0	0	0	0	-9.28859	-22.3001
																2032	-11.3672	-38.6709	0	0	0	5.00358	0	0	0	0	0	0	0	0	0	0	0	0	0	0	0	0	-11.3672	-33.6673
																2033	-13.4824	-52.1533	0	0	0	5.00358	0	0	0	0	0	0	0	0	0	0	0	0	0	0	0	0	-13.4824	-47.1497
																2034	-15.6095	-67.7629	0	0	0	5.00358	0	0	0	0	0	0	0	0	0	0	0	0	0	0	0	0	-15.6095	-62.7593
																2035	-17.7267	-85.4896	0	0	0	5.00358	0	0	0	0	0	0	0	0	0	0	0	0	0	0	0	0	-17.7267	-80.486
																2036	-19.8148	-105.304	0	0	0	5.00358	0	0	0	0	0	0	0	0	0	0	0	0	0	0	0	0	-19.8148	-100.301
																2037	-21.8574	-127.162	0	0	0	5.00358	0	0	0	0	0	0	0	0	0	0	0	0	0	0	0	0	-21.8574	-122.158
																2038	-23.8412	-151.003	0	0	0	5.00358	0	0	0	0	0	0	0	0	0	0	0	0	0	0	0	0	-23.8412	-145.999
																2039	-25.7549	-176.758	0	0	0	5.00358	0	0	0	0	0	0	0	0	0	0	0	0	0	0	0	0	-25.7549	-171.754
																2040	-27.5896	-204.347	0	0	0	5.00358	0	0	0	0	0	0	0	0	0	0	0	0	0	0	0	0	-27.5896	-199.344
																2041	-29.338	-233.685	0	0	0	5.00358	0	0	0	0	0	0	0	0	0	0	0	0	0	0	0	0	-29.338	-228.682
																2042	-30.9935	-264.679	0	0	0	5.00358	0	0	0	0	0	0	0	0	0	0	0	0	0	0	0	0	-30.9935	-259.675
																2043	-32.5507	-297.23	0	0	0	5.00358	0	0	0	0	0	0	0	0	0	0	0	0	0	0	0	0	-32.5507	-292.226
																2044	-34.0044	-331.234	0	0	0	5.00358	0	0	0	0	0	0	0	0	0	0	0	0	0	0	0	0	-34.0044	-326.23
																2045	17.6073	-313.627	-24.8113	-24.8113	5.09947	10.103	5.09947	0	-15.866	-15.866	-14.1835	-0.63765	-1.0449	-0.782518	-0.782518	-0.782518	0	0	0	0	0	0	-18.7531	-344.983
																2046	-28.3006	-341.927	2.80517	-22.0061	2.38021e-07	10.103	0	2.38021e-07	-1.68255	-17.5486		-0.63765	-1.0449	-0.226574	-1.00909	0	-0.033809	-0.192765	0	0	0	0	-27.4045	-372.388
																2047	-30.5355	-372.463	0.986722	-21.0194	1.74186e-07	10.103	0	1.74186e-07	-1.68255	-19.2311		-0.63765	-1.0449	-0.217506	-1.2266	0	-0.0247417	-0.192765	0	0	0	0	-31.4488	-403.837
																2048	-32.4275	-404.89	0.778555	-20.2408	1.28892e-07	10.103	0	1.28892e-07	-1.68255	-20.9137		-0.63765	-1.0449	-0.211073	-1.43767	0	-0.0183081	-0.192765	0	0	0	0	-33.5425	-437.379
																2049	-34.0251	-438.915	0.630603	-19.6102	9.67131e-08	10.103	0	9.67131e-08	-1.68255	-22.5962		-0.63765	-1.0449	-0.206502	-1.64417	0	-0.0137373	-0.192765	0	0	0	0	-35.2836	-472.663
																2050	-36.8851	-475.8	0.52522	-19.085	3.14762e-08	10.103	0	3.14762e-08	-1.8695	-24.4657		-0.7085	-1.161	0	-1.64417	0	0	0	0	0	0	0	-38.2294	-510.892
																2051	-35.2691	-511.07	0.449927	-18.6351	2.45097e-08	10.103	0	2.45097e-08	-1.8695	-26.3352		-0.7085	-1.161	0	-1.64417	0	0	0	0	0	0	0	-36.6886	-547.581
																2052	-35.5086	-546.578	0.395902	-18.2392	1.95244e-08	10.103	0	1.95244e-08	-1.8695	-28.2047		-0.7085	-1.161	0	-1.64417	0	0	0	0	0	0	0	-36.9822	-584.563
																2053	-35.7094	-582.288	0.356909	-17.8823	1.59415e-08	10.103	0	1.59415e-08	-1.8695	-30.0742		-0.7085	-1.161	0	-1.64417	0	0	0	0	0	0	0	-37.222	-621.785
																2054	-35.8788	-618.166	0.328537	-17.5537	1.33519e-08	10.103	0	1.33519e-08	-1.8695	-31.9437		-0.7085	-1.161	0	-1.64417	0	0	0	0	0	0	0	-37.4197	-659.205
																2055	-36.9884	-655.155	0.30767	-17.2461	1.14662e-08	10.103	0	1.14662e-08	-1.8695	-33.8132		-0.7085	-1.161	0	-1.64417	0	0	0	0	0	0	0	-38.5502	-697.755
																2056	-37.1136	-692.268	0.292104	-16.954	1.00797e-08	10.103	0	1.00797e-08	-1.8695	-35.6827		-0.7085	-1.161	0	-1.64417	0	0	0	0	0	0	0	-38.691	-736.446
																2057	-37.2206	-729.489	0.280281	-16.6737	9.04763e-09	10.103	0	9.04763e-09	-1.8695	-37.5522		-0.7085	-1.161	0	-1.64417	0	0	0	0	0	0	0	-38.8098	-775.256
																2058	-37.312	-766.801	0.271101	-16.4026	8.2676e-09	10.103	0	8.2676e-09	-1.8695	-39.4217		-0.7085	-1.161	0	-1.64417	0	0	0	0	0	0	0	-38.9104	-814.166
																2059	-37.3905	-804.191	0.263788	-16.1388	7.66714e-09	10.103	0	7.66714e-09	-1.8695	-41.2912		-0.7085	-1.161	0	-1.64417	0	0	0	0	0	0	0	-38.9962	-853.162
																2060	-36.0712	-840.263	0.257791	-15.881	7.19499e-09	10.103	0	7.19499e-09	-1.8695	-43.1607		-0.7085	-1.161	0	-1.64417	0	0	0	0	0	0	0	-37.6829	-890.845
																2061	-36.1194	-876.382	0.252723	-15.6283	6.81486e-09	10.103	0	6.81486e-09	-1.8695	-45.0302		-0.7085	-1.161	0	-1.64417	0	0	0	0	0	0	0	-37.7362	-928.582
																2062	-36.1622	-912.544	0.24831	-15.38	6.50104e-09	10.103	0	6.50104e-09	-1.8695	-46.8997		-0.7085	-1.161	0	-1.64417	0	0	0	0	0	0	0	-37.7834	-966.365
																2063	-36.1997	-948.744	0.244361	-15.1356	6.23535e-09	10.103	0	6.23535e-09	-1.8695	-48.7692		-0.7085	-1.161	0	-1.64417	0	0	0	0	0	0	0	-37.8248	-1004.19
																2064	-36.2329	-984.977	0.240738	-14.8949	6.00485e-09	10.103	0	6.00485e-09	-1.8695	-50.6387		-0.7085	-1.161	0	-1.64417	0	0	0	0	0	0	0	-37.8616	-1042.05
																2065	-33.5798	-1018.56	0.237346	-14.6575	5.8004e-09	10.103	0	5.8004e-09	-1.8695	-52.5082		-0.7085	-1.161	0	-1.64417	0	0	0	0	0	0	0	-35.212	-1077.26
																2066	-33.5776	-1052.13	0.234119	-14.4234	5.61548e-09	10.103	0	5.61548e-09	-1.8695	-54.3777		-0.7085	-1.161	0	-1.64417	0	0	0	0	0	0	0	-35.213	-1112.48
																2067	-33.5792	-1085.71	0.231009	-14.1924	5.44546e-09	10.103	0	5.44546e-09	-1.8695	-56.2472		-0.7085	-1.161	0	-1.64417	0	0	0	0	0	0	0	-35.2177	-1147.69
																2068	-33.5828	-1119.3	0.227984	-13.9644	5.28704e-09	10.103	0	5.28704e-09	-1.8695	-58.1167		-0.7085	-1.161	0	-1.64417	0	0	0	0	0	0	0	-35.2243	-1182.92
																2069	-33.5875	-1152.88	0.22502	-13.7394	5.13784e-09	10.103	0	5.13784e-09	-1.8695	-59.9862		-0.7085	-1.161	0	-1.64417	0	0	0	0	0	0	0	-35.232	-1218.15
																2070	-30.7614	-1183.65	0.222103	-13.5173	4.99615e-09	10.103	0	4.99615e-09	-1.8695	-61.8557		-0.7085	-1.161	0	-1.64417	0	0	0	0	0	0	0	-32.4088	-1250.56
																2071	-30.732	-1214.38	0.219221	-13.2981	4.86076e-09	10.103	0	4.86076e-09	-1.8695	-63.7251		-0.7085	-1.161	0	-1.64417	0	0	0	0	0	0	0	-32.3822	-1282.94
																2072	-30.7102	-1245.09	0.216367	-13.0817	4.73075e-09	10.103	0	4.73075e-09	-1.8695	-65.5946		-0.7085	-1.161	0	-1.64417	0	0	0	0	0	0	0	-32.3634	-1315.3
																2073	-30.6944	-1275.78	0.213536	-12.8682	4.60547e-09	10.103	0	4.60547e-09	-1.8695	-67.4641		-0.7085	-1.161	0	-1.64417	0	0	0	0	0	0	0	-32.3503	-1347.66
																2074	654.627	-621.154	-418.017	-430.885	42.9922	53.0952	42.9922	4.60547e-09	-100.956	-168.42	-99.0862	-0.7085	-1.161	-0.00260599	-1.64678	0	0	0	0	-0.00260599	-149.102	-149.102	29.5421	-1318.11
																2075	54.7601	-566.394	35.4692	-395.416	0.0530527	53.1483	0	0.0530527	-1.8695	-170.289		-0.7085	-1.161	-0.00260599	-1.64938		0	0	0	-0.00260599	0	-149.102	88.4103	-1229.7
																2076	45.0223	-521.372	11.316	-384.1	0.0375137	53.1858	0	0.0375137	-1.8695	-172.159		-0.7085	-1.161	-0.00260599	-1.65199		0	0	0	-0.00260599	0	-149.102	54.5036	-1175.2
																2077	36.6589	-484.713	9.67397	-374.426	0.0265263	53.2123	0	0.0265263	-1.8695	-174.028		-0.7085	-1.161	-0.00260599	-1.6546		0	0	0	-0.00260599	0	-149.102	44.4873	-1130.71
																2078	29.3588	-455.354	8.40341	-366.022	0.018757	53.2311	0	0.018757	-1.8695	-175.898		-0.7085	-1.161	-0.00260599	-1.6572		0	0	0	-0.00260599	0	-149.102	35.9089	-1094.8
																2079	22.8921	-432.462	7.41837	-358.604	0.0132633	53.2443	0	0.0132633	-1.8695	-177.767		-0.7085	-1.161	-0.00260599	-1.65981		0	0	0	-0.00260599	0	-149.102	28.4516	-1066.35
																2080	17.0904	-415.372	6.65266	-351.951	0.0093786	53.2537	0	0.0093786	-1.8695	-179.637		-0.7085	-1.161	-0.00260599	-1.66241		0	0	0	-0.00260599	0	-149.102	21.8804	-1044.47
																2081	11.8309	-403.541	6.05542	-345.896	0.00663173	53.2603	0	0.00663173	-1.8695	-181.506		-0.7085	-1.161	-0.00260599	-1.66502		0	0	0	-0.00260599	0	-149.102	16.0209	-1028.45
																2082	7.02363	-396.517	5.58754	-340.308	0.00468939	53.265	0	0.00468939	-1.8695	-183.376		-0.7085	-1.161	-0.00260599	-1.66763		0	0	0	-0.00260599	0	-149.102	10.7438	-1017.71
																2083	2.60238	-393.915	5.219	-335.089	0.00331595	53.2684	0	0.00331595	-1.8695	-185.245		-0.7085	-1.161	-0.00260599	-1.67023		0	0	0	-0.00260599	0	-149.102	5.95259	-1011.75
																2084	-1.48191	-395.397	4.92676	-330.163	0.00234477	53.2707	0	0.00234477	-1.8695	-187.115		-0.7085	-1.161	-0.00260599	-1.67284		0	0	0	-0.00260599	0	-149.102	1.57509	-1010.18
																2085	-5.26639	-400.663	4.69314	-325.469	0.00116247	53.2719	0	0.00116247	-1.8695	-188.984		-0.7085	-1.161	0	-1.67284		0	0	0	0	0	-149.102	-2.44158	-1012.62
																2086	-8.77949	-409.443	4.50457	-320.965	0.000822017	53.2727	0	0.000822017	-1.8695	-190.854		-0.7085	-1.161	0	-1.67284		0	0	0	0	0	-149.102	-6.14359	-1018.76
																2087	-12.0439	-421.486	4.35064	-316.614	0.00058128	53.2733	0	0.00058128	-1.8695	-192.723		-0.7085	-1.161	0	-1.67284		0	0	0	0	0	-149.102	-9.5622	-1028.33
																2088	-15.0777	-436.564	4.22335	-312.391	0.000411053	53.2737	0	0.000411053	-1.8695	-194.593		-0.7085	-1.161	0	-1.67284		0	0	0	0	0	-149.102	-12.7235	-1041.05
																2089	-17.8959	-454.46	4.11656	-308.274	0.000290682	53.274	0	0.000290682	-1.8695	-196.462		-0.7085	-1.161	0	-1.67284		0	0	0	0	0	-149.102	-15.6486	-1056.7
																2090	-20.5107	-474.971	4.02554	-304.249	0.000205567	53.2742	0	0.000205567	-1.8695	-198.332		-0.7085	-1.161	0	-1.67284		0	0	0	0	0	-149.102	-18.3545	-1075.05
																2091	-22.9322	-497.903	3.94668	-300.302	0.00014538	53.2743	0	0.00014538	-1.8695	-200.201		-0.7085	-1.161	0	-1.67284		0	0	0	0	0	-149.102	-20.8548	-1095.91
																2092	-25.1684	-523.071	3.87718	-296.425	0.000102821	53.2744	0	0.000102821	-1.8695	-202.071		-0.7085	-1.161	0	-1.67284		0	0	0	0	0	-149.102	-23.1606	-1119.07
																2093	-27.2256	-550.297	3.8149	-292.61	7.27268e-05	53.2745	0	7.27268e-05	-1.8695	-203.94		-0.7085	-1.161	0	-1.67284		0	0	0	0	0	-149.102	-25.2801	-1144.35
																2094	-29.1086	-579.405	3.75818	-288.852	5.14462e-05	53.2745	0	5.14462e-05	-1.8695	-205.81		-0.7085	-1.161	0	-1.67284		0	0	0	0	0	-149.102	-27.2198	-1171.57
																2095	28.2574	-551.148	-40.7597	-329.612	1.76168	55.0362	1.7615	0.000179491	-19.5948	-225.405	-17.7253	-0.7085	-1.161	0	-1.67284	0	0	0	0	0	0	-149.102	-30.3354	-1201.9
																2096	-23.3968	-574.545	23.2842	-306.327	2.58365e-05	55.0362	0	2.58365e-05	-1.8695	-227.274		-0.7085	-1.161	0	-1.67284		0	0	0	0	0	-149.102	-1.98206	-1203.89
																2097	-25.9644	-600.509	4.72222	-301.605	1.829e-05	55.0363	0	1.829e-05	-1.8695	-229.144		-0.7085	-1.161	0	-1.67284		0	0	0	0	0	-149.102	-23.1116	-1227
																2098	-28.1377	-628.647	4.44339	-297.162	1.29532e-05	55.0363	0	1.29532e-05	-1.8695	-231.013		-0.7085	-1.161	0	-1.67284		0	0	0	0	0	-149.102	-25.5638	-1252.56
																2099	-31.493	-660.14	4.23386	-292.928	9.17898e-06	55.0363	0	9.17898e-06	-1.8695	-232.883		-0.7085	-1.161	0	-1.67284		0	0	0	0	0	-149.102	-29.1286	-1281.69
																2100	-30.3066	-690.446	4.07344	-288.855	6.5097e-06	55.0363	0	6.5097e-06	-1.8695	-234.752		-0.7085	-1.161	0	-1.67284		0	0	0	0	0	-149.102	-28.1026	-1309.79
																2101	-30.9215	-721.368	3.94783	-284.907	4.62174e-06	55.0363	0	4.62174e-06	-1.8695	-236.622		-0.7085	-1.161	0	-1.67284		0	0	0	0	0	-149.102	-28.8432	-1338.64
																2102	-31.4525	-752.821	3.84689	-281.06	3.28627e-06	55.0363	0	3.28627e-06	-1.8695	-238.491		-0.7085	-1.161	0	-1.67284		0	0	0	0	0	-149.102	-29.4751	-1368.11
																2103	-31.9141	-784.735	3.76347	-277.296	2.3415e-06	55.0363	0	2.3415e-06	-1.8695	-240.361		-0.7085	-1.161	0	-1.67284		0	0	0	0	0	-149.102	-30.0201	-1398.13
																2104	-33.2832	-818.018	3.69248	-273.604	1.67301e-06	55.0363	0	1.67301e-06	-1.8695	-242.23		-0.7085	-1.161	0	-1.67284		0	0	0	0	0	-149.102	-31.4603	-1429.59
																2105	-33.6402	-851.658	3.63034	-269.974	1.19988e-06	55.0363	0	1.19988e-06	-1.8695	-244.1		-0.7085	-1.161	0	-1.67284		0	0	0	0	0	-149.102	-31.8794	-1461.47
																2106	-33.9547	-885.613	3.57451	-266.399	8.64922e-07	55.0363	0	8.64922e-07	-1.8695	-245.969		-0.7085	-1.161	0	-1.67284		0	0	0	0	0	-149.102	-32.2497	-1493.72
																2107	-34.2328	-919.846	3.52318	-262.876	6.2767e-07	55.0363	0	6.2767e-07	-1.8695	-247.839		-0.7085	-1.161	0	-1.67284		0	0	0	0	0	-149.102	-32.5791	-1526.3
																2108	-34.4797	-954.325	3.47509	-259.401	4.59522e-07	55.0363	0	4.59522e-07	-1.8695	-249.708		-0.7085	-1.161	0	-1.67284		0	0	0	0	0	-149.102	-32.8741	-1559.17
																2109	-33.3127	-987.638	3.42934	-255.971	3.40248e-07	55.0363	0	3.40248e-07	-1.8695	-251.578		-0.7085	-1.161	0	-1.67284		0	0	0	0	0	-149.102	-31.7528	-1590.93
																2110	-33.4991	-1021.14	3.38529	-252.586	2.55546e-07	55.0363	0	2.55546e-07	-1.8695	-253.447		-0.7085	-1.161	0	-1.67284		0	0	0	0	0	-149.102	-31.9833	-1622.91
																2111	-33.6674	-1054.8	3.34251	-249.244	1.95299e-07	55.0363	0	1.95299e-07	-1.8695	-255.317		-0.7085	-1.161	0	-1.67284		0	0	0	0	0	-149.102	-32.1944	-1655.1
																2112	-33.8194	-1088.62	3.30068	-245.943	1.52356e-07	55.0363	0	1.52356e-07	-1.8695	-257.186		-0.7085	-1.161	0	-1.67284		0	0	0	0	0	-149.102	-32.3882	-1687.49
																2113	-33.9572	-1122.58	3.25959	-242.683	1.21658e-07	55.0363	0	1.21658e-07	-1.8695	-259.056		-0.7085	-1.161	0	-1.67284		0	0	0	0	0	-149.102	-32.5671	-1720.06
																2114	-31.3998	-1153.98	3.21907	-239.464	9.96288e-08	55.0363	0	9.96288e-08	-1.8695	-260.925		-0.7085	-1.161	0	-1.67284		0	0	0	0	0	-149.102	-30.0502	-1750.11
																2115	-31.4856	-1185.47	3.17904	-236.285	8.37375e-08	55.0363	0	8.37375e-08	-1.8695	-262.795		-0.7085	-1.161	0	-1.67284		0	0	0	0	0	-149.102	-30.1761	-1780.28
																2116	-31.5679	-1217.03	3.13941	-233.146	7.21956e-08	55.0363	0	7.21956e-08	-1.8695	-264.664		-0.7085	-1.161	0	-1.67284		0	0	0	0	0	-149.102	-30.298	-1810.58
																2117	-31.646	-1248.68	3.10014	-230.046	6.37377e-08	55.0363	0	6.37377e-08	-1.8695	-266.534		-0.7085	-1.161	0	-1.67284		0	0	0	0	0	-149.102	-30.4154	-1841
																2118	-31.7194	-1280.4	3.06121	-226.984	5.74687e-08	55.0363	0	5.74687e-08	-1.8695	-268.403		-0.7085	-1.161	0	-1.67284		0	0	0	0	0	-149.102	-30.5277	-1871.53
																2119	-28.957	-1309.36	3.02258	-223.962	5.27554e-08	55.0363	0	5.27554e-08	-1.8695	-270.273		-0.7085	-1.161	0	-1.67284		0	0	0	0	0	-149.102	-27.8039	-1899.33
																2120	-28.9865	-1338.34	2.98425	-220.978	4.915e-08	55.0363	0	4.915e-08	-1.8695	-272.142		-0.7085	-1.161	0	-1.67284		0	0	0	0	0	-149.102	-27.8718	-1927.2

## Sheet: Yr6
																Summary of emissions discounts to apply (to 2020 assumptions):
																	2020-2029		2030-2039		2040-2049		2050-2084		2085-2120
																	Core	FA	Core	FA	Core	FA	Core	FA	Core	FA
																Avoided emissions - Biomass (heat) - marginal supply	none	none	none	none	none	0.25258	0.9	0.039435	0	0
																Avoided emissions - Biomass (electricity) - marginal supply	none	none	0.9127	0.5635	0.8254	0.127	0.5635	0	0.127	0
																Avoided emissions - Incineration (electricity) - marginal supply	none	none	0.9127	0.5635	0.8254	0.127	0.5635	0	0.127	0
																Incineration (heat) - marginal supply	none	none	none	none	none	0	0.9	0.136905	0	0
																C storage - BECCS (biomass electricity)	none	none	0.09	0.45	0.18	0.9	0.45	1	0.9	1
																C storage - BECCS (biomass heat)	none	none	0	0	0	0.405	0	0.81	0.405	0.9
																Avoided emissions - Cement production - CCS application (calcination)	n/a	n/a	n/a	n/a	n/a	n/a	none	0.45568	0.93952	0.3952
																Avoided emissions - Cement production - furnace emissions reduction	n/a	n/a	n/a	n/a	n/a	n/a	0.9784	0.95104	0.95104	0.712
																Emissions - Wood panel (particle board) production (CCS on heat production)	none	none	none	none	none	0.6355	none	0.271	0.6355	0.19
																Emissions - Harvester/forwarder	none	none	none	none	none	0.55	0.87	0.1	0	0
	Annual C stock - total ecosystem (tonnes C) - >75% thin									Natural Forest' C sequestration
	Time Step	Total Ecosystem(GH model (thinned) average soil v3 Default Simu			Thinned	Thinned	Thinned				'Total Ecosystem(Afforestation (conservation) Default Simulation					Core targets scenario
		Forest ecosystem	HWP total	Net system C	Mulch/S C storage	HWP primary	HWP secondary				Net ecosystem C	Process emissions	Annual C flux	Net cumulative C sequestration and storage			6th planting (Mg CO2 eq)																							Plantation (Core)
	Year	Tonnes C	Tonnes C		Tonnes C					Year	Tonnes C		Mg CO2eq			Year	Terrestrial C storage		HWP C storage		Forestry/ wood processing emissions (total)		Forestry/ primary wood processing emissions	Secondary wood processing emissions	(BE)CCS (total)		(BE)CCS (primary)	(BE)CCS (secondary)	(BE)CCS (tertiary)	FF offset (total)		Primary electricity offset (biomass + incineration)	Secondary electricity offset (biomass + incineration)	Tertiary electricity offset (biomass + incineration)	Heat offset (biomass)	Heat offset (incineration)	Concrete offset (net)		Net - annual flux	Net - cumulative C sequestration
																	Annual flux	Accumulation	Annual flux	Accumulation	Annual flux	Accumulation			Annual flux	Accumulation				Annual flux	Accumulation						Annual flux	Accumulation
	0	81	0	81	0	0	0			0						2020
	1	80.8365	0	80.8365		0	0			1						2021
	2	80.975	0	80.975		0	0			2						2022
	3	81.5	0	81.5		0	0			3						2023
	4	82.4699	0	82.4699		0	0			4						2024
	5	83.9295	0	83.9295		0	0			5	81	1.36461	5.00358	5.00358		2025	0	0	0	0	5.00358	5.00358	5.00358	0	0	0	0	0	0	0	0	0	0	0	0	0	0	0	5.00358	5.00358
	6	85.9132	0	85.9132		0	0			6	80.8429		0.575894	5.57947		2026	0.599623	0.599623	0	0	0	5.00358	0	0	0	0	0	0	0	0	0	0	0	0	0	0	0	0	0.599623	5.6032
	7	88.4465	0	88.4465		0	0			7	80.9424		-0.36473	5.21474		2027	-0.507923	0.0917007	0	0	0	5.00358	0	0	0	0	0	0	0	0	0	0	0	0	0	0	0	0	-0.507923	5.09528
	8	91.5466	0	91.5466		0	0			8	81.3393		-1.45544	3.7593		2028	-1.92493	-1.83323	0	0	0	5.00358	0	0	0	0	0	0	0	0	0	0	0	0	0	0	0	0	-1.92493	3.17035
	9	95.2236	0	95.2236		0	0			9	82.0617		-2.64872	1.11058		2029	-3.55635	-5.38958	0	0	0	5.00358	0	0	0	0	0	0	0	0	0	0	0	0	0	0	0	0	-3.55635	-0.386001
	10	99.4808	0	99.4808		0	0			10	83.1297		-3.91591	-2.80532		2030	-5.35193	-10.7415	0	0	0	5.00358	0	0	0	0	0	0	0	0	0	0	0	0	0	0	0	0	-5.35193	-5.73793
	11	104.315	0	104.315		0	0			11	84.5573		-5.23457	-8.03989		2031	-7.27359	-18.0151	0	0	0	5.00358	0	0	0	0	0	0	0	0	0	0	0	0	0	0	0	0	-7.27359	-13.0115
	12	109.719	0	109.719		0	0			12	86.3534		-6.58557	-14.6255		2032	-9.28859	-27.3037	0	0	0	5.00358	0	0	0	0	0	0	0	0	0	0	0	0	0	0	0	0	-9.28859	-22.3001
	13	115.68	0	115.68		0	0			13	88.5221		-7.95205	-22.5775		2033	-11.3672	-38.6709	0	0	0	5.00358	0	0	0	0	0	0	0	0	0	0	0	0	0	0	0	0	-11.3672	-33.6673
	14	122.183	0	122.183		0	0			14	91.0637		-9.31896	-31.8965		2034	-13.4824	-52.1533	0	0	0	5.00358	0	0	0	0	0	0	0	0	0	0	0	0	0	0	0	0	-13.4824	-47.1497
	15	129.207	0	129.207		0	0			15	93.9745		-10.673	-42.5695		2035	-15.6095	-67.7629	0	0	0	5.00358	0	0	0	0	0	0	0	0	0	0	0	0	0	0	0	0	-15.6095	-62.7593
	16	136.731	0	136.731		0	0			16	97.2478		-12.0023	-54.5718		2036	-17.7267	-85.4896	0	0	0	5.00358	0	0	0	0	0	0	0	0	0	0	0	0	0	0	0	0	-17.7267	-80.486
	17	144.732	0	144.732		0	0			17	100.874		-13.2969	-67.8687		2037	-19.8148	-105.304	0	0	0	5.00358	0	0	0	0	0	0	0	0	0	0	0	0	0	0	0	0	-19.8148	-100.301
	18	153.185	0	153.185		0	0			18	104.842		-14.548	-82.4167		2038	-21.8574	-127.162	0	0	0	5.00358	0	0	0	0	0	0	0	0	0	0	0	0	0	0	0	0	-21.8574	-122.158
	19	162.063	0	162.063		0	0			19	109.137		-15.7483	-98.165		2039	-23.8412	-151.003	0	0	0	5.00358	0	0	0	0	0	0	0	0	0	0	0	0	0	0	0	0	-23.8412	-145.999
	20	171.337	0	171.337		0	0			20	113.744		-16.8918	-115.057		2040	-25.7549	-176.758	0	0	0	5.00358	0	0	0	0	0	0	0	0	0	0	0	0	0	0	0	0	-25.7549	-171.754
	21	166.535	6.76672	173.301	0.415937	6.35078	0			21	118.646		-17.9733	-133.03		2041	-27.5896	-204.347	0	0	0	5.00358	0	0	0	0	0	0	0	0	0	0	0	0	0	0	0	0	-27.5896	-199.344
	22	174.253	6.00167	180.255		5.40511	0.596564			22	123.824		-18.9887	-152.019		2042	-29.338	-233.685	0	0	0	5.00358	0	0	0	0	0	0	0	0	0	0	0	0	0	0	0	0	-29.338	-228.682
	23	182.581	5.73256	188.313		4.71306	1.01951			23	129.261		-19.9347	-171.953		2043	-30.9935	-264.679	0	0	0	5.00358	0	0	0	0	0	0	0	0	0	0	0	0	0	0	0	0	-30.9935	-259.675
	24	191.425	5.52023	196.945		4.20096	1.31927			24	134.936		-20.8082	-192.762		2044	-32.5507	-297.23	0	0	0	5.00358	0	0	0	0	0	0	0	0	0	0	0	0	0	0	0	0	-32.5507	-292.226
	25	200.704	5.34825	206.052		3.81671	1.53154			25	138.961		-14.7598	-207.521		2045	-34.0044	-331.234	0	0	0	5.00358	0	0	0	0	0	0	0	0	0	0	0	0	0	0	0	0	-34.0044	-326.23
	26	210.764	5.20501	215.969		3.52345	1.68155			26	143.702		-17.382	-224.903		2046	17.6073	-313.627	-24.8113	-24.8113	8.32153	13.3251	8.32153	0	-3.1732	-3.1732	-2.83669	-0.12753	-0.20898	-5.08575	-5.08575	-5.08575	0	0	0	0	0	0	-7.14141	-333.372
	27	220.383	5.0823	225.465		3.2951	1.7872			27	148.506		-17.6139	-242.517		2047	-28.3006	-341.927	2.80517	-22.0061	3.74541e-07	13.3251	0	3.74541e-07	-0.33651	-3.50971		-0.12753	-0.20898	-1.47255	-6.5583	0	-0.219732	-1.25282	0	0	0	0	-27.3045	-360.676
	28	230.067	4.97433	235.041		3.11319	1.86114			28	153.352		-17.7693	-260.287		2048	-30.5355	-372.463	0.986722	-21.0194	2.74092e-07	13.3251	0	2.74092e-07	-0.33651	-3.84622		-0.12753	-0.20898	-1.41362	-7.97192	0	-0.160801	-1.25282	0	0	0	0	-31.2989	-391.975
	29	239.806	4.87699	244.683		2.96466	1.91232			29	159.692		-23.2471	-283.534		2049	-32.4275	-404.89	0.778555	-20.2408	2.0282e-07	13.3251	0	2.0282e-07	-0.33651	-4.18273		-0.12753	-0.20898	-1.37181	-9.34373	0	-0.118988	-1.25282	0	0	0	0	-33.3572	-425.332
	30	249.591	4.78739	254.378		2.84026	1.94712			30	165.832		-22.5139	-306.048		2050	-34.0251	-438.915	0.630603	-19.6102	1.52184e-07	13.3251	0	1.52184e-07	-0.841274	-5.02401		-0.318825	-0.522449	-0.916251	-10.26	0	-0.0609526	-0.855299	0	0	0	0	-35.1521	-460.484
	31	259.679	4.70348	264.382		2.73343	1.97004			31	175.455		-35.2823	-341.33		2051	-36.8851	-475.8	0.52522	-19.085	1.16148e-07	13.3251	0	1.16148e-07	-0.841274	-5.86528		-0.318825	-0.522449	-0.901818	-11.1618	0	-0.0465195	-0.855299	0	0	0	0	-38.103	-498.587
	32	269.8	4.62381	274.424		2.63952	1.98429			32	184.967		-34.8791	-376.209		2052	-35.2691	-511.07	0.449927	-18.6351	9.04419e-08	13.3251	0	9.04419e-08	-0.841274	-6.70655		-0.318825	-0.522449	-0.891522	-12.0533	0	-0.0362236	-0.855299	0	0	0	0	-36.5519	-535.139
	33	279.952	4.54737	284.499		2.55523	1.99214			33	194.39		-34.5515	-410.761		2053	-35.5086	-546.578	0.395902	-18.2392	7.20458e-08	13.3251	0	7.20458e-08	-0.841274	-7.54783		-0.318825	-0.522449	-0.884154	-12.9375	0	-0.0288557	-0.855299	0	0	0	0	-36.8381	-571.978
	34	290.127	4.47343	294.601		2.4782	1.99523			34	203.739		-34.2804	-445.041		2054	-35.7094	-582.288	0.356909	-17.8823	5.88248e-08	13.3251	0	5.88248e-08	-0.841274	-8.3891		-0.318825	-0.522449	-0.878859	-13.8163	0	-0.0235604	-0.855299	0	0	0	0	-37.0726	-609.05
	35	300.325	4.40149	304.726		2.40676	1.99473			35	213.027		-34.0532	-479.094		2055	-35.8788	-618.166	0.328537	-17.5537	4.92691e-08	13.3251	0	4.92691e-08	-0.841274	-9.23037		-0.318825	-0.522449	-0.875032	-14.6914	0	-0.0197332	-0.855299	0	0	0	0	-37.2665	-646.317
	36	310.163	4.33118	314.494		2.33973	1.99146			36	219.105		-22.2888	-501.383		2056	-36.9884	-655.155	0.30767	-17.2461	4.23108e-08	13.3251	0	4.23108e-08	-0.841274	-10.0716		-0.318825	-0.522449	-0.872245	-15.5636	0	-0.0169462	-0.855299	0	0	0	0	-38.3942	-684.711
	37	320.013	4.26226	324.276		2.27624	1.98602			37	225.133		-22.1014	-523.484		2057	-37.1136	-692.268	0.292104	-16.954	3.71945e-08	13.3251	0	3.71945e-08	-0.841274	-10.9129		-0.318825	-0.522449	-0.870196	-16.4338	0	-0.0148971	-0.855299	0	0	0	0	-38.533	-723.244
	38	329.876	4.19454	334.07		2.21567	1.97887			38	231.118		-21.9445	-545.429		2058	-37.2206	-729.489	0.280281	-16.6737	3.33861e-08	13.3251	0	3.33861e-08	-0.841274	-11.7542		-0.318825	-0.522449	-0.868671	-17.3025	0	-0.0133718	-0.855299	0	0	0	0	-38.6502	-761.894
	39	339.748	4.1279	343.876		2.15757	1.97032			39	237.067		-21.8117	-567.241		2059	-37.312	-766.801	0.271101	-16.4026	3.05077e-08	13.3251	0	3.05077e-08	-0.841274	-12.5955		-0.318825	-0.522449	-0.867518	-18.17	0	-0.0122189	-0.855299	0	0	0	0	-38.7497	-800.644
	40	349.63	4.06224	353.692		2.10163	1.96061			40	242.985		-21.699	-588.94		2060	-37.3905	-804.191	0.263788	-16.1388	2.8292e-08	13.3251	0	2.8292e-08	-0.841274	-13.4367		-0.318825	-0.522449	-0.86663	-19.0366	0	-0.0113315	-0.855299	0	0	0	0	-38.8346	-839.478
	41	358.788	3.99751	362.786		2.04758	1.94993			41	248.464		-20.0901	-609.03		2061	-36.0712	-840.263	0.257791	-15.881	2.65498e-08	13.3251	0	2.65498e-08	-0.841274	-14.278		-0.318825	-0.522449	-0.865932	-19.9026	0	-0.0106337	-0.855299	0	0	0	0	-37.5206	-876.999
	42	367.946	3.93366	371.879		1.99526	1.93839			42	253.915		-19.989	-629.019		2062	-36.1194	-876.382	0.252723	-15.6283	2.51471e-08	13.3251	0	2.51471e-08	-0.841274	-15.1193		-0.318825	-0.522449	-0.865371	-20.7679	0	-0.0100719	-0.855299	0	0	0	0	-37.5733	-914.572
	43	377.104	3.87066	380.974		1.94453	1.92613			43	259.343		-19.9032	-648.922		2063	-36.1622	-912.544	0.24831	-15.38	2.39891e-08	13.3251	0	2.39891e-08	-0.841274	-15.9606		-0.318825	-0.522449	-0.864907	-21.6328	0	-0.00960808	-0.855299	0	0	0	0	-37.62	-952.192
	44	386.263	3.80848	390.071		1.89527	1.91321			44	264.751		-19.8296	-668.752		2064	-36.1997	-948.744	0.244361	-15.1356	2.30087e-08	13.3251	0	2.30087e-08	-0.841274	-16.8018		-0.318825	-0.522449	-0.864514	-22.4973	0	-0.00921539	-0.855299	0	0	0	0	-37.6611	-989.853
	45	395.423	3.74711	399.17		1.8474	1.89971			45	270.142		-19.7665	-688.518		2065	-36.2329	-984.977	0.240738	-14.8949	2.21581e-08	13.3251	0	2.21581e-08	-0.841274	-17.6431		-0.318825	-0.522449	-0.864174	-23.3615	0	-0.00887474	-0.855299	0	0	0	0	-37.6976	-1027.55
	46	403.812	3.68654	407.499		1.80085	1.88568			46	275.112		-18.2224	-706.74		2066	-33.5798	-1018.56	0.237346	-14.6575	2.14037e-08	13.3251	0	2.14037e-08	-0.841274	-18.4844		-0.318825	-0.522449	-0.863871	-24.2254	0	-0.00857257	-0.855299	0	0	0	0	-35.0476	-1062.6
	47	412.194	3.62675	415.82		1.75557	1.87118			47	280.063		-18.1553	-724.896		2067	-33.5776	-1052.13	0.234119	-14.4234	2.07213e-08	13.3251	0	2.07213e-08	-0.841274	-19.3257		-0.318825	-0.522449	-0.863598	-25.089	0	-0.00829928	-0.855299	0	0	0	0	-35.0484	-1097.65
	48	420.569	3.56774	424.137		1.71149	1.85625			48	284.999		-18.0982	-742.994		2068	-33.5792	-1085.71	0.231009	-14.1924	2.0094e-08	13.3251	0	2.0094e-08	-0.841274	-20.1669		-0.318825	-0.522449	-0.863347	-25.9523	0	-0.00804801	-0.855299	0	0	0	0	-35.0529	-1132.7
	49	428.94	3.5095	432.45		1.66858	1.84092			49	289.924		-18.0569	-761.051		2069	-33.5828	-1119.3	0.227984	-13.9644	1.95094e-08	13.3251	0	1.95094e-08	-0.841274	-21.0082		-0.318825	-0.522449	-0.863113	-26.8155	0	-0.00781386	-0.855299	0	0	0	0	-35.0592	-1167.76
	50	250.406	117.514	367.92	8.22192	107.466	1.82594			50	294.838		-18.0171	-779.068		2070	-33.5875	-1152.88	0.22502	-13.7394	1.89588e-08	13.3251	0	1.89588e-08	-0.841274	-21.8495		-0.318825	-0.522449	-0.862892	-27.6783	0	-0.00759335	-0.855299	0	0	0	0	-35.0667	-1202.83
	51	235.471	107.841	343.312		98.6261	9.21454			51	299.396		-16.7129	-795.781		2071	-30.7614	-1183.65	0.222103	-13.5173	1.8436e-08	13.3251	0	1.8436e-08	-0.841274	-22.6908		-0.318825	-0.522449	-0.862683	-28.541	0	-0.00738395	-0.855299	0	0	0	0	-32.2433	-1235.07
	52	223.192	104.754	327.947		91.5144	13.2401			52	303.94		-16.6615	-812.442		2072	-30.732	-1214.38	0.219221	-13.2981	1.79364e-08	13.3251	0	1.79364e-08	-0.841274	-23.532		-0.318825	-0.522449	-0.862483	-29.4035	0	-0.00718385	-0.855299	0	0	0	0	-32.2165	-1267.29
	53	213.194	102.116	315.311		85.7258	16.3903			53	308.472		-16.6177	-829.06		2073	-30.7102	-1245.09	0.216367	-13.0817	1.74566e-08	13.3251	0	1.74566e-08	-0.841274	-24.3733		-0.318825	-0.522449	-0.862291	-30.2658	0	-0.00699171	-0.855299	0	0	0	0	-32.1974	-1299.48
	54	205.188	99.8243	305.012		80.9551	18.8692			54	312.994		-16.5804	-845.64		2074	-30.6944	-1275.78	0.213536	-12.8682	1.69943e-08	13.3251	0	1.69943e-08	-0.841274	-25.2146		-0.318825	-0.522449	-0.862105	-31.1279	0	-0.00680655	-0.855299	0	0	0	0	-32.1842	-1331.67
	55	198.944	97.8011	296.745		76.9713	20.8298			55	317.507		-16.5483	-862.189		2075	654.627	-621.154	-418.017	-430.885	158.643	171.968	158.643	1.69943e-08	-45.4301	-70.6446	-44.5888	-0.318825	-0.522449	-23.1934	-54.3213	-22.2718	-0.00680655	-0.855299	0	-0.0594749	-336.622	-336.622	-9.9919	-1341.66
	56	194.283	95.9867	290.27		73.5991	22.3876			56	321.752		-15.5635	-877.752		2076	54.7601	-566.394	35.4692	-395.416	0.195766	172.164	0	0.195766	-0.841274	-71.4859		-0.318825	-0.522449	-2.21013	-56.5314		-1.29535	-0.855299	0	-0.0594749	0	-336.622	87.3737	-1254.29
	57	191.057	94.3353	285.392		70.7051	23.6301			57	325.986		-15.5257	-893.278		2077	45.0223	-521.372	11.316	-384.1	0.138427	172.302	0	0.138427	-0.841274	-72.3272		-0.318825	-0.522449	-1.96728	-58.4987		-1.0525	-0.855299	0	-0.0594749	0	-336.622	53.6681	-1200.62
	58	189.141	92.8114	281.952		68.1873	24.6241			58	330.211		-15.4932	-908.771		2078	36.6589	-484.713	9.67397	-374.426	0.097883	172.4	0	0.097883	-0.841274	-73.1685		-0.318825	-0.522449	-1.77953	-60.2782		-0.864758	-0.855299	0	-0.0594749	0	-336.622	43.8099	-1156.81
	59	188.431	91.388	279.819		65.9673	25.4208			59	334.429		-15.4652	-924.236		2079	29.3588	-455.354	8.40341	-366.022	0.069214	172.469	0	0.069214	-0.841274	-74.0097		-0.318825	-0.522449	-1.63374	-61.912		-0.718961	-0.855299	0	-0.0594749	0	-336.622	35.3565	-1121.45
	60	188.835	90.0444	278.88		63.9849	26.0595			60	338.64		-15.441	-939.677		2080	22.8921	-432.462	7.41837	-358.604	0.0489419	172.518	0	0.0489419	-0.841274	-74.851		-0.318825	-0.522449	-1.51998	-63.432		-0.60521	-0.855299	0	-0.0594749	0	-336.622	27.9982	-1093.45
	61	190.272	88.7644	279.036		62.1935	26.5709			61	342.529		-14.2596	-953.937		2081	17.0904	-415.372	6.65266	-351.951	0.0346074	172.553	0	0.0346074	-0.841274	-75.6923		-0.318825	-0.522449	-1.43079	-64.8627		-0.516016	-0.855299	0	-0.0594749	0	-336.622	21.5057	-1071.95
	62	192.666	87.5359	280.202		60.5572	26.9787			62	346.407		-14.2193	-968.156		2082	11.8309	-403.541	6.05542	-345.896	0.0244713	172.577	0	0.0244713	-0.841274	-76.5336		-0.318825	-0.522449	-1.36048	-66.2232		-0.445704	-0.855299	0	-0.0594749	0	-336.622	15.7091	-1056.24
	63	195.951	86.3493	282.3		59.0477	27.3016			63	350.276		-14.1847	-982.341		2083	7.02363	-396.517	5.58754	-340.308	0.017304	172.594	0	0.017304	-0.841274	-77.3748		-0.318825	-0.522449	-1.30473	-67.5279		-0.389954	-0.855299	0	-0.0594749	0	-336.622	10.4825	-1045.76
	64	200.063	85.1975	285.26		57.6432	27.5543			64	354.136		-14.1547	-996.496		2084	2.60238	-393.915	5.219	-335.089	0.012236	172.607	0	0.012236	-0.841274	-78.2161		-0.318825	-0.522449	-1.26025	-68.7882		-0.345474	-0.855299	0	-0.0594749	0	-336.622	5.7321	-1040.02
	65	204.944	84.0748	289.018		56.3264	27.7484			65	358.007		-14.1943	-1010.69		2085	-1.48191	-395.397	4.92676	-330.163	0.00549854	172.612	0	0.00549854	-1.68255	-79.8987		-0.63765	-1.0449	-0.262573	-69.0508		-0.0698081	-0.192765	0	0	0	-336.622	1.50523	-1038.52
	66	210.537	82.977	293.514		55.0837	27.8932			66	361.578		-13.0916	-1023.78		2086	-5.26639	-400.663	4.69314	-325.469	0.00388815	172.616	0	0.00388815	-1.68255	-81.5812		-0.63765	-1.0449	-0.256054	-69.3068		-0.0632891	-0.192765	0	0	0	-336.622	-2.50796	-1041.03
	67	216.792	81.9006	298.692		53.9045	27.996			67	365.139		-13.0578	-1036.84		2087	-8.77949	-409.443	4.50457	-320.965	0.00274943	172.619	0	0.00274943	-1.68255	-83.2638		-0.63765	-1.0449	-0.250734	-69.5576		-0.0579691	-0.192765	0	0	0	-336.622	-6.20545	-1047.23
	68	223.656	80.8432	304.499		52.7802	28.0629			68	368.692		-13.0286	-1049.87		2088	-12.0439	-421.486	4.35064	-316.614	0.00194423	172.621	0	0.00194423	-1.68255	-84.9463		-0.63765	-1.0449	-0.246353	-69.8039		-0.0535887	-0.192765	0	0	0	-336.622	-9.62024	-1056.85
	69	231.081	79.8027	310.884		51.704	28.0988			69	372.239		-13.0033	-1062.87		2089	-15.0777	-436.564	4.22335	-312.391	0.00137486	172.622	0	0.00137486	-1.68255	-86.6288		-0.63765	-1.0449	-0.242712	-70.0466		-0.0499472	-0.192765	0	0	0	-336.622	-12.7783	-1069.63
	70	239.02	78.7778	317.797		50.6703	28.1075			70	375.779		-12.9809	-1075.85		2090	-17.8959	-454.46	4.11656	-308.274	0.000972256	172.623	0	0.000972256	-1.68255	-88.3114		-0.63765	-1.0449	-0.239654	-70.2863		-0.0468889	-0.192765	0	0	0	-336.622	-15.7006	-1085.33
	71	231.313	89.8941	321.207	4.95963	56.8177	28.1167			71	378.979		-11.733	-1087.59		2091	-20.5107	-474.971	4.02554	-304.249	0.000687568	172.624	0	0.000687568	-1.68255	-89.9939		-0.63765	-1.0449	-0.237057	-70.5233		-0.0442926	-0.192765	0	0	0	-336.622	-18.4041	-1103.73
	72	237.694	83.5438	321.238		54.793	28.7508			72	382.167		-11.6891	-1099.27		2092	-22.9322	-497.903	3.94668	-300.302	0.000486259	172.624	0	0.000486259	-1.68255	-91.6765		-0.63765	-1.0449	-0.234829	-70.7582		-0.042064	-0.192765	0	0	0	-336.622	-20.9024	-1124.64
	73	244.775	82.256	327.031		53.0851	29.1708			73	385.344		-11.6509	-1110.93		2093	-25.1684	-523.071	3.87718	-296.425	0.00034391	172.625	0	0.00034391	-1.68255	-93.359		-0.63765	-1.0449	-0.232894	-70.9911		-0.0401291	-0.192765	0	0	0	-336.622	-23.2063	-1147.84
	74	252.449	81.0441	333.493		51.6087	29.4354			74	388.513		-11.6174	-1122.54		2094	-27.2256	-550.297	3.8149	-292.61	0.000243252	172.625	0	0.000243252	-1.68255	-95.0416		-0.63765	-1.0449	-0.231195	-71.2222		-0.0384303	-0.192765	0	0	0	-336.622	-25.3242	-1173.17
	75	261.038	79.8894	340.928		50.303	29.5864			75	391.673		-11.5877	-1134.13		2095	-29.1086	-579.405	3.75818	-288.852	0.000172074	172.625	0	0.000172074	-1.68255	-96.7241		-0.63765	-1.0449	-0.229687	-71.4519		-0.036922	-0.192765	0	0	0	-336.622	-27.2625	-1200.43
	76	269.304	78.7785	348.082		49.1249	29.6536			76	394.647		-10.9046	-1145.03		2096	28.2574	-551.148	-40.7597	-329.612	5.89236	178.517	5.89176	0.000600351	-17.6353	-114.359	-15.9528	-0.63765	-1.0449	-0.853094	-72.305	-0.880131	0.219802	-0.192765	0	0	0	-336.622	-25.0983	-1225.53
	77	277.737	77.7018	355.439		48.0436	29.6582			77	397.611		-10.8671	-1155.9		2097	-23.3968	-574.545	23.2842	-306.327	8.64165e-05	178.517	0	8.64165e-05	-1.68255	-116.042		-0.63765	-1.0449	-0.265133	-72.5702		-0.0723685	-0.192765	0	0	0	-336.622	-2.06018	-1227.59
	78	286.315	76.6527	362.967		47.0369	29.6157			78	400.565		-10.8334	-1166.74		2098	-25.9644	-600.509	4.72222	-301.605	6.11752e-05	178.518	0	6.11752e-05	-1.68255	-117.725		-0.63765	-1.0449	-0.253813	-72.824		-0.0610481	-0.192765	0	0	0	-336.622	-23.1785	-1250.77
	79	295.019	75.6263	370.645		46.0892	29.5371			79	403.511		-10.8033	-1177.54		2099	-28.1377	-628.647	4.44339	-297.162	4.3325e-05	178.518	0	4.3325e-05	-1.68255	-119.407		-0.63765	-1.0449	-0.245542	-73.0695		-0.0527767	-0.192765	0	0	0	-336.622	-25.6224	-1276.39
	80	304.096	74.6192	378.715		45.189	29.4303			80	406.45		-10.776	-1188.31		2100	-31.493	-660.14	4.23386	-292.928	3.07013e-05	178.518	0	3.07013e-05	-1.68255	-121.09		-0.63765	-1.0449	-0.239438	-73.309		-0.0466735	-0.192765	0	0	0	-336.622	-29.1811	-1305.57
	81	313.27	73.6291	386.9		44.328	29.3012			81	408.192		-6.38738	-1194.7		2101	-30.3066	-690.446	4.07344	-288.855	2.17732e-05	178.518	0	2.17732e-05	-1.68255	-122.772		-0.63765	-1.0449	-0.234879	-73.5438		-0.0421142	-0.192765	0	0	0	-336.622	-28.1506	-1333.72
	82	322.531	72.6543	395.185		43.5002	29.1541			82	409.898		-6.2551	-1200.96		2102	-30.9215	-721.368	3.94783	-284.907	1.54585e-05	178.518	0	1.54585e-05	-1.68255	-124.455		-0.63765	-1.0449	-0.231421	-73.7753		-0.0386563	-0.192765	0	0	0	-336.622	-28.8876	-1362.61
	83	331.867	71.6934	403.56		42.7012	28.9922			83	411.573		-6.13887	-1207.1		2103	-31.4525	-752.821	3.84689	-281.06	1.09917e-05	178.518	0	1.09917e-05	-1.68255	-126.137		-0.63765	-1.0449	-0.228751	-74.004		-0.0359863	-0.192765	0	0	0	-336.622	-29.5169	-1392.13
	84	341.271	70.7457	412.016		41.9277	28.8179			84	413.219		-6.03548	-1213.13		2104	-31.9141	-784.735	3.76347	-277.296	7.83171e-06	178.518	0	7.83171e-06	-1.68255	-127.82		-0.63765	-1.0449	-0.226646	-74.2307		-0.0338814	-0.192765	0	0	0	-336.622	-30.0598	-1422.19
	85	350.356	69.8104	420.166		41.1772	28.6332			85	414.839		-5.94241	-1219.07		2105	-33.2832	-818.018	3.69248	-273.604	5.59576e-06	178.518	0	5.59576e-06	-1.68255	-129.502		-0.63765	-1.0449	-0.224948	-74.4556		-0.0321837	-0.192765	0	0	0	-336.622	-31.4983	-1453.68
	86	359.492	68.8871	428.379		40.4478	28.4393			86	416.17		-4.88069	-1223.95		2106	-33.6402	-851.658	3.63034	-269.974	4.01329e-06	178.518	0	4.01329e-06	-1.68255	-131.185		-0.63765	-1.0449	-0.223546	-74.6791		-0.0307811	-0.192765	0	0	0	-336.622	-31.916	-1485.6
	87	368.674	67.9755	436.649		39.738	28.2375			87	417.475		-4.78507	-1228.74		2107	-33.9547	-885.613	3.57451	-266.399	2.89294e-06	178.518	0	2.89294e-06	-1.68255	-132.867		-0.63765	-1.0449	-0.222358	-74.9015		-0.0295936	-0.192765	0	0	0	-336.622	-32.2851	-1517.88
	88	377.897	67.0753	444.973		39.0466	28.0287			88	418.757		-4.69816	-1233.44		2108	-34.2328	-919.846	3.52318	-262.876	2.09939e-06	178.518	0	2.09939e-06	-1.68255	-134.55		-0.63765	-1.0449	-0.221329	-75.1228		-0.0285645	-0.192765	0	0	0	-336.622	-32.6135	-1550.5
	89	387.158	66.1864	453.345		38.3727	27.8137			89	420.016		-4.61831	-1238.06		2109	-34.4797	-954.325	3.47509	-259.401	1.53698e-06	178.518	0	1.53698e-06	-1.68255	-136.233		-0.63765	-1.0449	-0.220418	-75.3433		-0.0276532	-0.192765	0	0	0	-336.622	-32.9076	-1583.41
	90	395.722	65.3084	461.03		37.7154	27.5931			90	421.256		-4.54422	-1242.6		2110	-33.3127	-987.638	3.42934	-255.971	1.13804e-06	178.518	0	1.13804e-06	-1.68255	-137.915		-0.63765	-1.0449	-0.219596	-75.5628		-0.0268309	-0.192765	0	0	0	-336.622	-31.7855	-1615.19
	91	404.309	64.4414	468.75		37.074	27.3675			91	422.476		-4.47498	-1247.08		2111	-33.4991	-1021.14	3.38529	-252.586	8.54733e-07	178.518	0	8.54733e-07	-1.68255	-139.598		-0.63765	-1.0449	-0.218842	-75.7817		-0.0260768	-0.192765	0	0	0	-336.622	-32.0152	-1647.21
	92	412.918	63.5852	476.504		36.4479	27.1373			92	423.679		-4.40976	-1251.48		2112	-33.6674	-1054.8	3.34251	-249.244	6.53225e-07	178.518	0	6.53225e-07	-1.68255	-141.28		-0.63765	-1.0449	-0.218141	-75.9998		-0.025376	-0.192765	0	0	0	-336.622	-32.2256	-1679.43
	93	421.549	62.7397	484.289		35.8366	26.9032			93	424.864		-4.34804	-1255.83		2113	-33.8194	-1088.62	3.30068	-245.943	5.09592e-07	178.518	0	5.09592e-07	-1.68255	-142.963		-0.63765	-1.0449	-0.217483	-76.2173		-0.0247178	-0.192765	0	0	0	-336.622	-32.4187	-1711.85
	94	430.2	61.9048	492.105		35.2395	26.6653			94	426.034		-4.28925	-1260.12		2114	-33.9572	-1122.58	3.25959	-242.683	4.06915e-07	178.518	0	4.06915e-07	-1.68255	-144.645		-0.63765	-1.0449	-0.216859	-76.4342		-0.0240944	-0.192765	0	0	0	-336.622	-32.597	-1744.45
	95	438.097	61.0805	499.178		34.6563	26.4242			95	427.189		-4.23307	-1264.36		2115	-31.3998	-1153.98	3.21907	-239.464	3.33232e-07	178.518	0	3.33232e-07	-1.68255	-146.328		-0.63765	-1.0449	-0.216265	-76.6504		-0.0235001	-0.192765	0	0	0	-336.622	-30.0795	-1774.53
	96	446.003	60.2666	506.269		34.0865	26.1801			96	428.329		-4.1791	-1268.53		2116	-31.4856	-1185.47	3.17904	-236.285	2.8008e-07	178.518	0	2.8008e-07	-1.68255	-148.01		-0.63765	-1.0449	-0.215696	-76.8661		-0.0229308	-0.192765	0	0	0	-336.622	-30.2048	-1804.73
	97	453.917	59.4631	513.38		33.5297	25.9334			97	429.454		-4.12711	-1272.66		2117	-31.5679	-1217.03	3.13941	-233.146	2.41475e-07	178.518	0	2.41475e-07	-1.68255	-149.693		-0.63765	-1.0449	-0.215148	-77.0813		-0.0223832	-0.192765	0	0	0	-336.622	-30.3262	-1835.06
	98	461.841	58.6699	520.511		32.9855	25.6844			98	430.566		-4.07697	-1276.74		2118	-31.646	-1248.68	3.10014	-230.046	2.13186e-07	178.518	0	2.13186e-07	-1.68255	-151.375		-0.63765	-1.0449	-0.21462	-77.2959		-0.0218552	-0.192765	0	0	0	-336.622	-30.443	-1865.5
	99	469.775	57.8869	527.662		32.4535	25.4334			99	431.665		-4.02836	-1280.77		2119	-31.7194	-1280.4	3.06121	-226.984	1.92218e-07	178.518	0	1.92218e-07	-1.68255	-153.058		-0.63765	-1.0449	-0.21411	-77.51		-0.0213448	-0.192765	0	0	0	-336.622	-30.5549	-1896.06
	100	288.179	177.741	465.92	10.907	139.448	27.3859			100	432.75		-3.98124	-1284.75		2120	-28.957	-1309.36	3.02258	-223.962	1.76453e-07	178.518	0	1.76453e-07	-1.68255	-154.741		-0.63765	-1.0449	-0.213615	-77.7236		-0.0208507	-0.192765	0	0	0	-336.622	-27.8306	-1923.89
																Further Ambition targets scenario
																	6th planting (Mg CO2 eq)																							Plantation (Core)
																Year	Terrestrial C storage		HWP C storage		Forestry/ wood processing emissions (total)		Forestry/ primary wood processing emissions	Secondary wood processing emissions	(BE)CCS (total)		(BE)CCS (primary)	(BE)CCS (secondary)	(BE)CCS (tertiary)	FF offset (total)		Primary electricity offset (biomass + incineration)	Secondary electricity offset (biomass + incineration)	Tertiary electricity offset (biomass + incineration)	Heat offset (biomass)	Heat offset (incineration)	Concrete offset (net)		Net - annual flux	Net - cumulative C sequestration
																	Annual flux	Accumulation	Annual flux	Accumulation	Annual flux	Accumulation			Annual flux	Accumulation				Annual flux	Accumulation						Annual flux	Accumulation
																2020
																2021
																2022
																2023
																2024
																2025	0	0	0	0	5.00358	5.00358	5.00358	0	0	0	0	0	0	0	0	0	0	0	0	0	0	0	5.00358	5.00358
																2026	0.599623	0.599623	0	0	0	5.00358	0	0	0	0	0	0	0	0	0	0	0	0	0	0	0	0	0.599623	5.6032
																2027	-0.507923	0.0917007	0	0	0	5.00358	0	0	0	0	0	0	0	0	0	0	0	0	0	0	0	0	-0.507923	5.09528
																2028	-1.92493	-1.83323	0	0	0	5.00358	0	0	0	0	0	0	0	0	0	0	0	0	0	0	0	0	-1.92493	3.17035
																2029	-3.55635	-5.38958	0	0	0	5.00358	0	0	0	0	0	0	0	0	0	0	0	0	0	0	0	0	-3.55635	-0.386001
																2030	-5.35193	-10.7415	0	0	0	5.00358	0	0	0	0	0	0	0	0	0	0	0	0	0	0	0	0	-5.35193	-5.73793
																2031	-7.27359	-18.0151	0	0	0	5.00358	0	0	0	0	0	0	0	0	0	0	0	0	0	0	0	0	-7.27359	-13.0115
																2032	-9.28859	-27.3037	0	0	0	5.00358	0	0	0	0	0	0	0	0	0	0	0	0	0	0	0	0	-9.28859	-22.3001
																2033	-11.3672	-38.6709	0	0	0	5.00358	0	0	0	0	0	0	0	0	0	0	0	0	0	0	0	0	-11.3672	-33.6673
																2034	-13.4824	-52.1533	0	0	0	5.00358	0	0	0	0	0	0	0	0	0	0	0	0	0	0	0	0	-13.4824	-47.1497
																2035	-15.6095	-67.7629	0	0	0	5.00358	0	0	0	0	0	0	0	0	0	0	0	0	0	0	0	0	-15.6095	-62.7593
																2036	-17.7267	-85.4896	0	0	0	5.00358	0	0	0	0	0	0	0	0	0	0	0	0	0	0	0	0	-17.7267	-80.486
																2037	-19.8148	-105.304	0	0	0	5.00358	0	0	0	0	0	0	0	0	0	0	0	0	0	0	0	0	-19.8148	-100.301
																2038	-21.8574	-127.162	0	0	0	5.00358	0	0	0	0	0	0	0	0	0	0	0	0	0	0	0	0	-21.8574	-122.158
																2039	-23.8412	-151.003	0	0	0	5.00358	0	0	0	0	0	0	0	0	0	0	0	0	0	0	0	0	-23.8412	-145.999
																2040	-25.7549	-176.758	0	0	0	5.00358	0	0	0	0	0	0	0	0	0	0	0	0	0	0	0	0	-25.7549	-171.754
																2041	-27.5896	-204.347	0	0	0	5.00358	0	0	0	0	0	0	0	0	0	0	0	0	0	0	0	0	-27.5896	-199.344
																2042	-29.338	-233.685	0	0	0	5.00358	0	0	0	0	0	0	0	0	0	0	0	0	0	0	0	0	-29.338	-228.682
																2043	-30.9935	-264.679	0	0	0	5.00358	0	0	0	0	0	0	0	0	0	0	0	0	0	0	0	0	-30.9935	-259.675
																2044	-32.5507	-297.23	0	0	0	5.00358	0	0	0	0	0	0	0	0	0	0	0	0	0	0	0	0	-32.5507	-292.226
																2045	-34.0044	-331.234	0	0	0	5.00358	0	0	0	0	0	0	0	0	0	0	0	0	0	0	0	0	-34.0044	-326.23
																2046	17.6073	-313.627	-24.8113	-24.8113	5.09947	10.103	5.09947	0	-15.866	-15.866	-14.1835	-0.63765	-1.0449	-0.782518	-0.782518	-0.782518	0	0	0	0	0	0	-18.7531	-344.983
																2047	-28.3006	-341.927	2.80517	-22.0061	2.38021e-07	10.103	0	2.38021e-07	-1.68255	-17.5486		-0.63765	-1.0449	-0.226574	-1.00909	0	-0.033809	-0.192765	0	0	0	0	-27.4045	-372.388
																2048	-30.5355	-372.463	0.986722	-21.0194	1.74186e-07	10.103	0	1.74186e-07	-1.68255	-19.2311		-0.63765	-1.0449	-0.217506	-1.2266	0	-0.0247417	-0.192765	0	0	0	0	-31.4488	-403.837
																2049	-32.4275	-404.89	0.778555	-20.2408	1.28892e-07	10.103	0	1.28892e-07	-1.68255	-20.9137		-0.63765	-1.0449	-0.211073	-1.43767	0	-0.0183081	-0.192765	0	0	0	0	-33.5425	-437.379
																2050	-34.0251	-438.915	0.630603	-19.6102	4.12419e-08	10.103	0	4.12419e-08	-1.8695	-22.7832		-0.7085	-1.161	0	-1.43767	0	0	0	0	0	0	0	-35.264	-472.643
																2051	-36.8851	-475.8	0.52522	-19.085	3.14762e-08	10.103	0	3.14762e-08	-1.8695	-24.6527		-0.7085	-1.161	0	-1.43767	0	0	0	0	0	0	0	-38.2294	-510.873
																2052	-35.2691	-511.07	0.449927	-18.6351	2.45097e-08	10.103	0	2.45097e-08	-1.8695	-26.5222		-0.7085	-1.161	0	-1.43767	0	0	0	0	0	0	0	-36.6886	-547.561
																2053	-35.5086	-546.578	0.395902	-18.2392	1.95244e-08	10.103	0	1.95244e-08	-1.8695	-28.3916		-0.7085	-1.161	0	-1.43767	0	0	0	0	0	0	0	-36.9822	-584.544
																2054	-35.7094	-582.288	0.356909	-17.8823	1.59415e-08	10.103	0	1.59415e-08	-1.8695	-30.2611		-0.7085	-1.161	0	-1.43767	0	0	0	0	0	0	0	-37.222	-621.766
																2055	-35.8788	-618.166	0.328537	-17.5537	1.33519e-08	10.103	0	1.33519e-08	-1.8695	-32.1306		-0.7085	-1.161	0	-1.43767	0	0	0	0	0	0	0	-37.4197	-659.185
																2056	-36.9884	-655.155	0.30767	-17.2461	1.14662e-08	10.103	0	1.14662e-08	-1.8695	-34.0001		-0.7085	-1.161	0	-1.43767	0	0	0	0	0	0	0	-38.5502	-697.735
																2057	-37.1136	-692.268	0.292104	-16.954	1.00797e-08	10.103	0	1.00797e-08	-1.8695	-35.8696		-0.7085	-1.161	0	-1.43767	0	0	0	0	0	0	0	-38.691	-736.426
																2058	-37.2206	-729.489	0.280281	-16.6737	9.04763e-09	10.103	0	9.04763e-09	-1.8695	-37.7391		-0.7085	-1.161	0	-1.43767	0	0	0	0	0	0	0	-38.8098	-775.236
																2059	-37.312	-766.801	0.271101	-16.4026	8.2676e-09	10.103	0	8.2676e-09	-1.8695	-39.6086		-0.7085	-1.161	0	-1.43767	0	0	0	0	0	0	0	-38.9104	-814.147
																2060	-37.3905	-804.191	0.263788	-16.1388	7.66714e-09	10.103	0	7.66714e-09	-1.8695	-41.4781		-0.7085	-1.161	0	-1.43767	0	0	0	0	0	0	0	-38.9962	-853.143
																2061	-36.0712	-840.263	0.257791	-15.881	7.19499e-09	10.103	0	7.19499e-09	-1.8695	-43.3476		-0.7085	-1.161	0	-1.43767	0	0	0	0	0	0	0	-37.6829	-890.826
																2062	-36.1194	-876.382	0.252723	-15.6283	6.81486e-09	10.103	0	6.81486e-09	-1.8695	-45.2171		-0.7085	-1.161	0	-1.43767	0	0	0	0	0	0	0	-37.7362	-928.562
																2063	-36.1622	-912.544	0.24831	-15.38	6.50104e-09	10.103	0	6.50104e-09	-1.8695	-47.0866		-0.7085	-1.161	0	-1.43767	0	0	0	0	0	0	0	-37.7834	-966.345
																2064	-36.1997	-948.744	0.244361	-15.1356	6.23535e-09	10.103	0	6.23535e-09	-1.8695	-48.9561		-0.7085	-1.161	0	-1.43767	0	0	0	0	0	0	0	-37.8248	-1004.17
																2065	-36.2329	-984.977	0.240738	-14.8949	6.00485e-09	10.103	0	6.00485e-09	-1.8695	-50.8256		-0.7085	-1.161	0	-1.43767	0	0	0	0	0	0	0	-37.8616	-1042.03
																2066	-33.5798	-1018.56	0.237346	-14.6575	5.8004e-09	10.103	0	5.8004e-09	-1.8695	-52.6951		-0.7085	-1.161	0	-1.43767	0	0	0	0	0	0	0	-35.212	-1077.24
																2067	-33.5776	-1052.13	0.234119	-14.4234	5.61548e-09	10.103	0	5.61548e-09	-1.8695	-54.5646		-0.7085	-1.161	0	-1.43767	0	0	0	0	0	0	0	-35.213	-1112.46
																2068	-33.5792	-1085.71	0.231009	-14.1924	5.44546e-09	10.103	0	5.44546e-09	-1.8695	-56.4341		-0.7085	-1.161	0	-1.43767	0	0	0	0	0	0	0	-35.2177	-1147.67
																2069	-33.5828	-1119.3	0.227984	-13.9644	5.28704e-09	10.103	0	5.28704e-09	-1.8695	-58.3036		-0.7085	-1.161	0	-1.43767	0	0	0	0	0	0	0	-35.2243	-1182.9
																2070	-33.5875	-1152.88	0.22502	-13.7394	5.13784e-09	10.103	0	5.13784e-09	-1.8695	-60.1731		-0.7085	-1.161	0	-1.43767	0	0	0	0	0	0	0	-35.232	-1218.13
																2071	-30.7614	-1183.65	0.222103	-13.5173	4.99615e-09	10.103	0	4.99615e-09	-1.8695	-62.0426		-0.7085	-1.161	0	-1.43767	0	0	0	0	0	0	0	-32.4088	-1250.54
																2072	-30.732	-1214.38	0.219221	-13.2981	4.86076e-09	10.103	0	4.86076e-09	-1.8695	-63.9121		-0.7085	-1.161	0	-1.43767	0	0	0	0	0	0	0	-32.3822	-1282.92
																2073	-30.7102	-1245.09	0.216367	-13.0817	4.73075e-09	10.103	0	4.73075e-09	-1.8695	-65.7816		-0.7085	-1.161	0	-1.43767	0	0	0	0	0	0	0	-32.3634	-1315.29
																2074	-30.6944	-1275.78	0.213536	-12.8682	4.60547e-09	10.103	0	4.60547e-09	-1.8695	-67.6511		-0.7085	-1.161	0	-1.43767	0	0	0	0	0	0	0	-32.3503	-1347.64
																2075	654.627	-621.154	-418.017	-430.885	42.9922	53.0952	42.9922	4.60547e-09	-100.956	-168.607	-99.0862	-0.7085	-1.161	-0.00260599	-1.44028	0	0	0	0	-0.00260599	-149.102	-149.102	29.5421	-1318.09
																2076	54.7601	-566.394	35.4692	-395.416	0.0530527	53.1483	0	0.0530527	-1.8695	-170.476		-0.7085	-1.161	-0.00260599	-1.44288		0	0	0	-0.00260599	0	-149.102	88.4103	-1229.68
																2077	45.0223	-521.372	11.316	-384.1	0.0375137	53.1858	0	0.0375137	-1.8695	-172.346		-0.7085	-1.161	-0.00260599	-1.44549		0	0	0	-0.00260599	0	-149.102	54.5036	-1175.18
																2078	36.6589	-484.713	9.67397	-374.426	0.0265263	53.2123	0	0.0265263	-1.8695	-174.215		-0.7085	-1.161	-0.00260599	-1.44809		0	0	0	-0.00260599	0	-149.102	44.4873	-1130.69
																2079	29.3588	-455.354	8.40341	-366.022	0.018757	53.2311	0	0.018757	-1.8695	-176.085		-0.7085	-1.161	-0.00260599	-1.4507		0	0	0	-0.00260599	0	-149.102	35.9089	-1094.78
																2080	22.8921	-432.462	7.41837	-358.604	0.0132633	53.2443	0	0.0132633	-1.8695	-177.954		-0.7085	-1.161	-0.00260599	-1.45331		0	0	0	-0.00260599	0	-149.102	28.4516	-1066.33
																2081	17.0904	-415.372	6.65266	-351.951	0.0093786	53.2537	0	0.0093786	-1.8695	-179.824		-0.7085	-1.161	-0.00260599	-1.45591		0	0	0	-0.00260599	0	-149.102	21.8804	-1044.45
																2082	11.8309	-403.541	6.05542	-345.896	0.00663173	53.2603	0	0.00663173	-1.8695	-181.693		-0.7085	-1.161	-0.00260599	-1.45852		0	0	0	-0.00260599	0	-149.102	16.0209	-1028.43
																2083	7.02363	-396.517	5.58754	-340.308	0.00468939	53.265	0	0.00468939	-1.8695	-183.563		-0.7085	-1.161	-0.00260599	-1.46112		0	0	0	-0.00260599	0	-149.102	10.7438	-1017.69
																2084	2.60238	-393.915	5.219	-335.089	0.00331595	53.2684	0	0.00331595	-1.8695	-185.432		-0.7085	-1.161	-0.00260599	-1.46373		0	0	0	-0.00260599	0	-149.102	5.95259	-1011.73
																2085	-1.48191	-395.397	4.92676	-330.163	0.00164394	53.27	0	0.00164394	-1.8695	-187.302		-0.7085	-1.161	0	-1.46373		0	0	0	0	0	-149.102	1.577	-1010.16
																2086	-5.26639	-400.663	4.69314	-325.469	0.00116247	53.2712	0	0.00116247	-1.8695	-189.171		-0.7085	-1.161	0	-1.46373		0	0	0	0	0	-149.102	-2.44158	-1012.6
																2087	-8.77949	-409.443	4.50457	-320.965	0.000822017	53.272	0	0.000822017	-1.8695	-191.041		-0.7085	-1.161	0	-1.46373		0	0	0	0	0	-149.102	-6.14359	-1018.74
																2088	-12.0439	-421.486	4.35064	-316.614	0.00058128	53.2726	0	0.00058128	-1.8695	-192.91		-0.7085	-1.161	0	-1.46373		0	0	0	0	0	-149.102	-9.5622	-1028.3
																2089	-15.0777	-436.564	4.22335	-312.391	0.000411053	53.273	0	0.000411053	-1.8695	-194.78		-0.7085	-1.161	0	-1.46373		0	0	0	0	0	-149.102	-12.7235	-1041.03
																2090	-17.8959	-454.46	4.11656	-308.274	0.000290682	53.2733	0	0.000290682	-1.8695	-196.649		-0.7085	-1.161	0	-1.46373		0	0	0	0	0	-149.102	-15.6486	-1056.68
																2091	-20.5107	-474.971	4.02554	-304.249	0.000205567	53.2735	0	0.000205567	-1.8695	-198.519		-0.7085	-1.161	0	-1.46373		0	0	0	0	0	-149.102	-18.3545	-1075.03
																2092	-22.9322	-497.903	3.94668	-300.302	0.00014538	53.2736	0	0.00014538	-1.8695	-200.388		-0.7085	-1.161	0	-1.46373		0	0	0	0	0	-149.102	-20.8548	-1095.89
																2093	-25.1684	-523.071	3.87718	-296.425	0.000102821	53.2737	0	0.000102821	-1.8695	-202.258		-0.7085	-1.161	0	-1.46373		0	0	0	0	0	-149.102	-23.1606	-1119.05
																2094	-27.2256	-550.297	3.8149	-292.61	7.27268e-05	53.2738	0	7.27268e-05	-1.8695	-204.127		-0.7085	-1.161	0	-1.46373		0	0	0	0	0	-149.102	-25.2801	-1144.33
																2095	-29.1086	-579.405	3.75818	-288.852	5.14462e-05	53.2738	0	5.14462e-05	-1.8695	-205.997		-0.7085	-1.161	0	-1.46373		0	0	0	0	0	-149.102	-27.2198	-1171.55
																2096	28.2574	-551.148	-40.7597	-329.612	1.76168	55.0355	1.7615	0.000179491	-19.5948	-225.592	-17.7253	-0.7085	-1.161	0	-1.46373	0	0	0	0	0	0	-149.102	-30.3354	-1201.88
																2097	-23.3968	-574.545	23.2842	-306.327	2.58365e-05	55.0355	0	2.58365e-05	-1.8695	-227.461		-0.7085	-1.161	0	-1.46373		0	0	0	0	0	-149.102	-1.98206	-1203.86
																2098	-25.9644	-600.509	4.72222	-301.605	1.829e-05	55.0356	0	1.829e-05	-1.8695	-229.331		-0.7085	-1.161	0	-1.46373		0	0	0	0	0	-149.102	-23.1116	-1226.98
																2099	-28.1377	-628.647	4.44339	-297.162	1.29532e-05	55.0356	0	1.29532e-05	-1.8695	-231.2		-0.7085	-1.161	0	-1.46373		0	0	0	0	0	-149.102	-25.5638	-1252.54
																2100	-31.493	-660.14	4.23386	-292.928	9.17898e-06	55.0356	0	9.17898e-06	-1.8695	-233.07		-0.7085	-1.161	0	-1.46373		0	0	0	0	0	-149.102	-29.1286	-1281.67
																2101	-30.3066	-690.446	4.07344	-288.855	6.5097e-06	55.0356	0	6.5097e-06	-1.8695	-234.939		-0.7085	-1.161	0	-1.46373		0	0	0	0	0	-149.102	-28.1026	-1309.77
																2102	-30.9215	-721.368	3.94783	-284.907	4.62174e-06	55.0356	0	4.62174e-06	-1.8695	-236.809		-0.7085	-1.161	0	-1.46373		0	0	0	0	0	-149.102	-28.8432	-1338.61
																2103	-31.4525	-752.821	3.84689	-281.06	3.28627e-06	55.0356	0	3.28627e-06	-1.8695	-238.678		-0.7085	-1.161	0	-1.46373		0	0	0	0	0	-149.102	-29.4751	-1368.09
																2104	-31.9141	-784.735	3.76347	-277.296	2.3415e-06	55.0356	0	2.3415e-06	-1.8695	-240.548		-0.7085	-1.161	0	-1.46373		0	0	0	0	0	-149.102	-30.0201	-1398.11
																2105	-33.2832	-818.018	3.69248	-273.604	1.67301e-06	55.0356	0	1.67301e-06	-1.8695	-242.417		-0.7085	-1.161	0	-1.46373		0	0	0	0	0	-149.102	-31.4603	-1429.57
																2106	-33.6402	-851.658	3.63034	-269.974	1.19988e-06	55.0356	0	1.19988e-06	-1.8695	-244.287		-0.7085	-1.161	0	-1.46373		0	0	0	0	0	-149.102	-31.8794	-1461.45
																2107	-33.9547	-885.613	3.57451	-266.399	8.64922e-07	55.0356	0	8.64922e-07	-1.8695	-246.156		-0.7085	-1.161	0	-1.46373		0	0	0	0	0	-149.102	-32.2497	-1493.7
																2108	-34.2328	-919.846	3.52318	-262.876	6.2767e-07	55.0356	0	6.2767e-07	-1.8695	-248.026		-0.7085	-1.161	0	-1.46373		0	0	0	0	0	-149.102	-32.5791	-1526.28
																2109	-34.4797	-954.325	3.47509	-259.401	4.59522e-07	55.0356	0	4.59522e-07	-1.8695	-249.895		-0.7085	-1.161	0	-1.46373		0	0	0	0	0	-149.102	-32.8741	-1559.15
																2110	-33.3127	-987.638	3.42934	-255.971	3.40248e-07	55.0356	0	3.40248e-07	-1.8695	-251.764		-0.7085	-1.161	0	-1.46373		0	0	0	0	0	-149.102	-31.7528	-1590.9
																2111	-33.4991	-1021.14	3.38529	-252.586	2.55546e-07	55.0356	0	2.55546e-07	-1.8695	-253.634		-0.7085	-1.161	0	-1.46373		0	0	0	0	0	-149.102	-31.9833	-1622.89
																2112	-33.6674	-1054.8	3.34251	-249.244	1.95299e-07	55.0356	0	1.95299e-07	-1.8695	-255.503		-0.7085	-1.161	0	-1.46373		0	0	0	0	0	-149.102	-32.1944	-1655.08
																2113	-33.8194	-1088.62	3.30068	-245.943	1.52356e-07	55.0356	0	1.52356e-07	-1.8695	-257.373		-0.7085	-1.161	0	-1.46373		0	0	0	0	0	-149.102	-32.3882	-1687.47
																2114	-33.9572	-1122.58	3.25959	-242.683	1.21658e-07	55.0356	0	1.21658e-07	-1.8695	-259.242		-0.7085	-1.161	0	-1.46373		0	0	0	0	0	-149.102	-32.5671	-1720.04
																2115	-31.3998	-1153.98	3.21907	-239.464	9.96288e-08	55.0356	0	9.96288e-08	-1.8695	-261.112		-0.7085	-1.161	0	-1.46373		0	0	0	0	0	-149.102	-30.0502	-1750.09
																2116	-31.4856	-1185.47	3.17904	-236.285	8.37375e-08	55.0356	0	8.37375e-08	-1.8695	-262.981		-0.7085	-1.161	0	-1.46373		0	0	0	0	0	-149.102	-30.1761	-1780.26
																2117	-31.5679	-1217.03	3.13941	-233.146	7.21956e-08	55.0356	0	7.21956e-08	-1.8695	-264.851		-0.7085	-1.161	0	-1.46373		0	0	0	0	0	-149.102	-30.298	-1810.56
																2118	-31.646	-1248.68	3.10014	-230.046	6.37377e-08	55.0356	0	6.37377e-08	-1.8695	-266.72		-0.7085	-1.161	0	-1.46373		0	0	0	0	0	-149.102	-30.4154	-1840.98
																2119	-31.7194	-1280.4	3.06121	-226.984	5.74687e-08	55.0356	0	5.74687e-08	-1.8695	-268.59		-0.7085	-1.161	0	-1.46373		0	0	0	0	0	-149.102	-30.5277	-1871.5
																2120	-28.957	-1309.36	3.02258	-223.962	5.27554e-08	55.0356	0	5.27554e-08	-1.8695	-270.459		-0.7085	-1.161	0	-1.46373		0	0	0	0	0	-149.102	-27.8039	-1899.31

## Sheet: Yr7
																Summary of emissions discounts to apply (to 2020 assumptions):
																	2020-2029		2030-2039		2040-2049		2050-2084		2085-2120
																	Core	FA	Core	FA	Core	FA	Core	FA	Core	FA
																Avoided emissions - Biomass (heat) - marginal supply	none	none	none	none	none	0.25258	0.9	0.039435	0	0
																Avoided emissions - Biomass (electricity) - marginal supply	none	none	0.9127	0.5635	0.8254	0.127	0.5635	0	0.127	0
																Avoided emissions - Incineration (electricity) - marginal supply	none	none	0.9127	0.5635	0.8254	0.127	0.5635	0	0.127	0
																Incineration (heat) - marginal supply	none	none	none	none	none	0	0.9	0.136905	0	0
																C storage - BECCS (biomass electricity)	none	none	0.09	0.45	0.18	0.9	0.45	1	0.9	1
																C storage - BECCS (biomass heat)	none	none	0	0	0	0.405	0	0.81	0.405	0.9
																Avoided emissions - Cement production - CCS application (calcination)	n/a	n/a	n/a	n/a	n/a	n/a	none	0.45568	0.93952	0.3952
																Avoided emissions - Cement production - furnace emissions reduction	n/a	n/a	n/a	n/a	n/a	n/a	0.9784	0.95104	0.95104	0.712
																Emissions - Wood panel (particle board) production (CCS on heat production)	none	none	none	none	none	0.6355	none	0.271	0.6355	0.19
																Emissions - Harvester/forwarder	none	none	none	none	none	0.55	0.87	0.1	0	0
	Annual C stock - total ecosystem (tonnes C) - >75% thin									Natural Forest' C sequestration
	Time Step	Total Ecosystem(GH model (thinned) average soil v3 Default Simu			Thinned	Thinned	Thinned				'Total Ecosystem(Afforestation (conservation) Default Simulation					Core targets scenario
		Forest ecosystem	HWP total	Net system C	Mulch/S C storage	HWP primary	HWP secondary				Net ecosystem C	Process emissions	Annual C flux	Net cumulative C sequestration and storage			7th planting (Mg CO2 eq)																							Plantation (Core)
	Year	Tonnes C	Tonnes C		Tonnes C					Year	Tonnes C		Mg CO2eq			Year	Terrestrial C storage		HWP C storage		Forestry/ wood processing emissions (total)		Forestry/ primary wood processing emissions	Secondary wood processing emissions	(BE)CCS (total)		(BE)CCS (primary)	(BE)CCS (secondary)	(BE)CCS (tertiary)	FF offset (total)		Primary electricity offset (biomass + incineration)	Secondary electricity offset (biomass + incineration)	Tertiary electricity offset (biomass + incineration)	Heat offset (biomass)	Heat offset (incineration)	Concrete offset (net)		Net - annual flux	Net - cumulative C sequestration
																	Annual flux	Accumulation	Annual flux	Accumulation	Annual flux	Accumulation			Annual flux	Accumulation				Annual flux	Accumulation						Annual flux	Accumulation
	0	81	0	81	0	0	0			0						2020
	1	80.8365	0	80.8365		0	0			1						2021
	2	80.975	0	80.975		0	0			2						2022
	3	81.5	0	81.5		0	0			3						2023
	4	82.4699	0	82.4699		0	0			4						2024
	5	83.9295	0	83.9295		0	0			5						2025
	6	85.9132	0	85.9132		0	0			6	81	1.36461	5.00358	5.00358		2026	0	0	0	0	5.00358	5.00358	5.00358	0	0	0	0	0	0	0	0	0	0	0	0	0	0	0	5.00358	5.00358
	7	88.4465	0	88.4465		0	0			7	80.8429		0.575894	5.57947		2027	0.599623	0.599623	0	0	0	5.00358	0	0	0	0	0	0	0	0	0	0	0	0	0	0	0	0	0.599623	5.6032
	8	91.5466	0	91.5466		0	0			8	80.9424		-0.36473	5.21474		2028	-0.507923	0.0917007	0	0	0	5.00358	0	0	0	0	0	0	0	0	0	0	0	0	0	0	0	0	-0.507923	5.09528
	9	95.2236	0	95.2236		0	0			9	81.3393		-1.45544	3.7593		2029	-1.92493	-1.83323	0	0	0	5.00358	0	0	0	0	0	0	0	0	0	0	0	0	0	0	0	0	-1.92493	3.17035
	10	99.4808	0	99.4808		0	0			10	82.0617		-2.64872	1.11058		2030	-3.55635	-5.38958	0	0	0	5.00358	0	0	0	0	0	0	0	0	0	0	0	0	0	0	0	0	-3.55635	-0.386001
	11	104.315	0	104.315		0	0			11	83.1297		-3.91591	-2.80532		2031	-5.35193	-10.7415	0	0	0	5.00358	0	0	0	0	0	0	0	0	0	0	0	0	0	0	0	0	-5.35193	-5.73793
	12	109.719	0	109.719		0	0			12	84.5573		-5.23457	-8.03989		2032	-7.27359	-18.0151	0	0	0	5.00358	0	0	0	0	0	0	0	0	0	0	0	0	0	0	0	0	-7.27359	-13.0115
	13	115.68	0	115.68		0	0			13	86.3534		-6.58557	-14.6255		2033	-9.28859	-27.3037	0	0	0	5.00358	0	0	0	0	0	0	0	0	0	0	0	0	0	0	0	0	-9.28859	-22.3001
	14	122.183	0	122.183		0	0			14	88.5221		-7.95205	-22.5775		2034	-11.3672	-38.6709	0	0	0	5.00358	0	0	0	0	0	0	0	0	0	0	0	0	0	0	0	0	-11.3672	-33.6673
	15	129.207	0	129.207		0	0			15	91.0637		-9.31896	-31.8965		2035	-13.4824	-52.1533	0	0	0	5.00358	0	0	0	0	0	0	0	0	0	0	0	0	0	0	0	0	-13.4824	-47.1497
	16	136.731	0	136.731		0	0			16	93.9745		-10.673	-42.5695		2036	-15.6095	-67.7629	0	0	0	5.00358	0	0	0	0	0	0	0	0	0	0	0	0	0	0	0	0	-15.6095	-62.7593
	17	144.732	0	144.732		0	0			17	97.2478		-12.0023	-54.5718		2037	-17.7267	-85.4896	0	0	0	5.00358	0	0	0	0	0	0	0	0	0	0	0	0	0	0	0	0	-17.7267	-80.486
	18	153.185	0	153.185		0	0			18	100.874		-13.2969	-67.8687		2038	-19.8148	-105.304	0	0	0	5.00358	0	0	0	0	0	0	0	0	0	0	0	0	0	0	0	0	-19.8148	-100.301
	19	162.063	0	162.063		0	0			19	104.842		-14.548	-82.4167		2039	-21.8574	-127.162	0	0	0	5.00358	0	0	0	0	0	0	0	0	0	0	0	0	0	0	0	0	-21.8574	-122.158
	20	171.337	0	171.337		0	0			20	109.137		-15.7483	-98.165		2040	-23.8412	-151.003	0	0	0	5.00358	0	0	0	0	0	0	0	0	0	0	0	0	0	0	0	0	-23.8412	-145.999
	21	166.535	6.76672	173.301	0.415937	6.35078	0			21	113.744		-16.8918	-115.057		2041	-25.7549	-176.758	0	0	0	5.00358	0	0	0	0	0	0	0	0	0	0	0	0	0	0	0	0	-25.7549	-171.754
	22	174.253	6.00167	180.255		5.40511	0.596564			22	118.646		-17.9733	-133.03		2042	-27.5896	-204.347	0	0	0	5.00358	0	0	0	0	0	0	0	0	0	0	0	0	0	0	0	0	-27.5896	-199.344
	23	182.581	5.73256	188.313		4.71306	1.01951			23	123.824		-18.9887	-152.019		2043	-29.338	-233.685	0	0	0	5.00358	0	0	0	0	0	0	0	0	0	0	0	0	0	0	0	0	-29.338	-228.682
	24	191.425	5.52023	196.945		4.20096	1.31927			24	129.261		-19.9347	-171.953		2044	-30.9935	-264.679	0	0	0	5.00358	0	0	0	0	0	0	0	0	0	0	0	0	0	0	0	0	-30.9935	-259.675
	25	200.704	5.34825	206.052		3.81671	1.53154			25	134.936		-20.8082	-192.762		2045	-32.5507	-297.23	0	0	0	5.00358	0	0	0	0	0	0	0	0	0	0	0	0	0	0	0	0	-32.5507	-292.226
	26	210.764	5.20501	215.969		3.52345	1.68155			26	138.961		-14.7598	-207.521		2046	-34.0044	-331.234	0	0	0	5.00358	0	0	0	0	0	0	0	0	0	0	0	0	0	0	0	0	-34.0044	-326.23
	27	220.383	5.0823	225.465		3.2951	1.7872			27	143.702		-17.382	-224.903		2047	17.6073	-313.627	-24.8113	-24.8113	8.32153	13.3251	8.32153	0	-3.1732	-3.1732	-2.83669	-0.12753	-0.20898	-5.08575	-5.08575	-5.08575	0	0	0	0	0	0	-7.14141	-333.372
	28	230.067	4.97433	235.041		3.11319	1.86114			28	148.506		-17.6139	-242.517		2048	-28.3006	-341.927	2.80517	-22.0061	3.74541e-07	13.3251	0	3.74541e-07	-0.33651	-3.50971		-0.12753	-0.20898	-1.47255	-6.5583	0	-0.219732	-1.25282	0	0	0	0	-27.3045	-360.676
	29	239.806	4.87699	244.683		2.96466	1.91232			29	153.352		-17.7693	-260.287		2049	-30.5355	-372.463	0.986722	-21.0194	2.74092e-07	13.3251	0	2.74092e-07	-0.33651	-3.84622		-0.12753	-0.20898	-1.41362	-7.97192	0	-0.160801	-1.25282	0	0	0	0	-31.2989	-391.975
	30	249.591	4.78739	254.378		2.84026	1.94712			30	159.692		-23.2471	-283.534		2050	-32.4275	-404.89	0.778555	-20.2408	2.0282e-07	13.3251	0	2.0282e-07	-0.841274	-4.6875		-0.318825	-0.522449	-0.936532	-8.90845	0	-0.081233	-0.855299	0	0	0	0	-33.4267	-425.402
	31	259.679	4.70348	264.382		2.73343	1.97004			31	165.832		-22.5139	-306.048		2051	-34.0251	-438.915	0.630603	-19.6102	1.52184e-07	13.3251	0	1.52184e-07	-0.841274	-5.52877		-0.318825	-0.522449	-0.916251	-9.8247	0	-0.0609526	-0.855299	0	0	0	0	-35.1521	-460.554
	32	269.8	4.62381	274.424		2.63952	1.98429			32	175.455		-35.2823	-341.33		2052	-36.8851	-475.8	0.52522	-19.085	1.16148e-07	13.3251	0	1.16148e-07	-0.841274	-6.37004		-0.318825	-0.522449	-0.901818	-10.7265	0	-0.0465195	-0.855299	0	0	0	0	-38.103	-498.657
	33	279.952	4.54737	284.499		2.55523	1.99214			33	184.967		-34.8791	-376.209		2053	-35.2691	-511.07	0.449927	-18.6351	9.04419e-08	13.3251	0	9.04419e-08	-0.841274	-7.21132		-0.318825	-0.522449	-0.891522	-11.618	0	-0.0362236	-0.855299	0	0	0	0	-36.5519	-535.209
	34	290.127	4.47343	294.601		2.4782	1.99523			34	194.39		-34.5515	-410.761		2054	-35.5086	-546.578	0.395902	-18.2392	7.20458e-08	13.3251	0	7.20458e-08	-0.841274	-8.05259		-0.318825	-0.522449	-0.884154	-12.5022	0	-0.0288557	-0.855299	0	0	0	0	-36.8381	-572.047
	35	300.325	4.40149	304.726		2.40676	1.99473			35	203.739		-34.2804	-445.041		2055	-35.7094	-582.288	0.356909	-17.8823	5.88248e-08	13.3251	0	5.88248e-08	-0.841274	-8.89386		-0.318825	-0.522449	-0.878859	-13.3811	0	-0.0235604	-0.855299	0	0	0	0	-37.0726	-609.12
	36	310.163	4.33118	314.494		2.33973	1.99146			36	213.027		-34.0532	-479.094		2056	-35.8788	-618.166	0.328537	-17.5537	4.92691e-08	13.3251	0	4.92691e-08	-0.841274	-9.73514		-0.318825	-0.522449	-0.875032	-14.2561	0	-0.0197332	-0.855299	0	0	0	0	-37.2665	-646.386
	37	320.013	4.26226	324.276		2.27624	1.98602			37	219.105		-22.2888	-501.383		2057	-36.9884	-655.155	0.30767	-17.2461	4.23108e-08	13.3251	0	4.23108e-08	-0.841274	-10.5764		-0.318825	-0.522449	-0.872245	-15.1283	0	-0.0169462	-0.855299	0	0	0	0	-38.3942	-684.78
	38	329.876	4.19454	334.07		2.21567	1.97887			38	225.133		-22.1014	-523.484		2058	-37.1136	-692.268	0.292104	-16.954	3.71945e-08	13.3251	0	3.71945e-08	-0.841274	-11.4177		-0.318825	-0.522449	-0.870196	-15.9985	0	-0.0148971	-0.855299	0	0	0	0	-38.533	-723.313
	39	339.748	4.1279	343.876		2.15757	1.97032			39	231.118		-21.9445	-545.429		2059	-37.2206	-729.489	0.280281	-16.6737	3.33861e-08	13.3251	0	3.33861e-08	-0.841274	-12.259		-0.318825	-0.522449	-0.868671	-16.8672	0	-0.0133718	-0.855299	0	0	0	0	-38.6502	-761.964
	40	349.63	4.06224	353.692		2.10163	1.96061			40	237.067		-21.8117	-567.241		2060	-37.312	-766.801	0.271101	-16.4026	3.05077e-08	13.3251	0	3.05077e-08	-0.841274	-13.1002		-0.318825	-0.522449	-0.867518	-17.7347	0	-0.0122189	-0.855299	0	0	0	0	-38.7497	-800.713
	41	358.788	3.99751	362.786		2.04758	1.94993			41	242.985		-21.699	-588.94		2061	-37.3905	-804.191	0.263788	-16.1388	2.8292e-08	13.3251	0	2.8292e-08	-0.841274	-13.9415		-0.318825	-0.522449	-0.86663	-18.6013	0	-0.0113315	-0.855299	0	0	0	0	-38.8346	-839.548
	42	367.946	3.93366	371.879		1.99526	1.93839			42	248.464		-20.0901	-609.03		2062	-36.0712	-840.263	0.257791	-15.881	2.65498e-08	13.3251	0	2.65498e-08	-0.841274	-14.7828		-0.318825	-0.522449	-0.865932	-19.4673	0	-0.0106337	-0.855299	0	0	0	0	-37.5206	-877.068
	43	377.104	3.87066	380.974		1.94453	1.92613			43	253.915		-19.989	-629.019		2063	-36.1194	-876.382	0.252723	-15.6283	2.51471e-08	13.3251	0	2.51471e-08	-0.841274	-15.6241		-0.318825	-0.522449	-0.865371	-20.3327	0	-0.0100719	-0.855299	0	0	0	0	-37.5733	-914.642
	44	386.263	3.80848	390.071		1.89527	1.91321			44	259.343		-19.9032	-648.922		2064	-36.1622	-912.544	0.24831	-15.38	2.39891e-08	13.3251	0	2.39891e-08	-0.841274	-16.4653		-0.318825	-0.522449	-0.864907	-21.1976	0	-0.00960808	-0.855299	0	0	0	0	-37.62	-952.262
	45	395.423	3.74711	399.17		1.8474	1.89971			45	264.751		-19.8296	-668.752		2065	-36.1997	-948.744	0.244361	-15.1356	2.30087e-08	13.3251	0	2.30087e-08	-0.841274	-17.3066		-0.318825	-0.522449	-0.864514	-22.0621	0	-0.00921539	-0.855299	0	0	0	0	-37.6611	-989.923
	46	403.812	3.68654	407.499		1.80085	1.88568			46	270.142		-19.7665	-688.518		2066	-36.2329	-984.977	0.240738	-14.8949	2.21581e-08	13.3251	0	2.21581e-08	-0.841274	-18.1479		-0.318825	-0.522449	-0.864174	-22.9262	0	-0.00887474	-0.855299	0	0	0	0	-37.6976	-1027.62
	47	412.194	3.62675	415.82		1.75557	1.87118			47	275.112		-18.2224	-706.74		2067	-33.5798	-1018.56	0.237346	-14.6575	2.14037e-08	13.3251	0	2.14037e-08	-0.841274	-18.9892		-0.318825	-0.522449	-0.863871	-23.7901	0	-0.00857257	-0.855299	0	0	0	0	-35.0476	-1062.67
	48	420.569	3.56774	424.137		1.71149	1.85625			48	280.063		-18.1553	-724.896		2068	-33.5776	-1052.13	0.234119	-14.4234	2.07213e-08	13.3251	0	2.07213e-08	-0.841274	-19.8304		-0.318825	-0.522449	-0.863598	-24.6537	0	-0.00829928	-0.855299	0	0	0	0	-35.0484	-1097.72
	49	428.94	3.5095	432.45		1.66858	1.84092			49	284.999		-18.0982	-742.994		2069	-33.5792	-1085.71	0.231009	-14.1924	2.0094e-08	13.3251	0	2.0094e-08	-0.841274	-20.6717		-0.318825	-0.522449	-0.863347	-25.5171	0	-0.00804801	-0.855299	0	0	0	0	-35.0529	-1132.77
	50	250.406	117.514	367.92	8.22192	107.466	1.82594			50	289.924		-18.0569	-761.051		2070	-33.5828	-1119.3	0.227984	-13.9644	1.95094e-08	13.3251	0	1.95094e-08	-0.841274	-21.513		-0.318825	-0.522449	-0.863113	-26.3802	0	-0.00781386	-0.855299	0	0	0	0	-35.0592	-1167.83
	51	235.471	107.841	343.312		98.6261	9.21454			51	294.838		-18.0171	-779.068		2071	-33.5875	-1152.88	0.22502	-13.7394	1.89588e-08	13.3251	0	1.89588e-08	-0.841274	-22.3542		-0.318825	-0.522449	-0.862892	-27.2431	0	-0.00759335	-0.855299	0	0	0	0	-35.0667	-1202.9
	52	223.192	104.754	327.947		91.5144	13.2401			52	299.396		-16.7129	-795.781		2072	-30.7614	-1183.65	0.222103	-13.5173	1.8436e-08	13.3251	0	1.8436e-08	-0.841274	-23.1955		-0.318825	-0.522449	-0.862683	-28.1058	0	-0.00738395	-0.855299	0	0	0	0	-32.2433	-1235.14
	53	213.194	102.116	315.311		85.7258	16.3903			53	303.94		-16.6615	-812.442		2073	-30.732	-1214.38	0.219221	-13.2981	1.79364e-08	13.3251	0	1.79364e-08	-0.841274	-24.0368		-0.318825	-0.522449	-0.862483	-28.9682	0	-0.00718385	-0.855299	0	0	0	0	-32.2165	-1267.36
	54	205.188	99.8243	305.012		80.9551	18.8692			54	308.472		-16.6177	-829.06		2074	-30.7102	-1245.09	0.216367	-13.0817	1.74566e-08	13.3251	0	1.74566e-08	-0.841274	-24.8781		-0.318825	-0.522449	-0.862291	-29.8305	0	-0.00699171	-0.855299	0	0	0	0	-32.1974	-1299.55
	55	198.944	97.8011	296.745		76.9713	20.8298			55	312.994		-16.5804	-845.64		2075	-30.6944	-1275.78	0.213536	-12.8682	1.69943e-08	13.3251	0	1.69943e-08	-0.841274	-25.7193		-0.318825	-0.522449	-0.862105	-30.6926	0	-0.00680655	-0.855299	0	0	0	0	-32.1842	-1331.74
	56	194.283	95.9867	290.27		73.5991	22.3876			56	317.507		-16.5483	-862.189		2076	654.627	-621.154	-418.017	-430.885	158.643	171.968	158.643	1.69943e-08	-45.4301	-71.1494	-44.5888	-0.318825	-0.522449	-23.1934	-53.886	-22.2718	-0.00680655	-0.855299	0	-0.0594749	-336.622	-336.622	-9.9919	-1341.73
	57	191.057	94.3353	285.392		70.7051	23.6301			57	321.752		-15.5635	-877.752		2077	54.7601	-566.394	35.4692	-395.416	0.195766	172.164	0	0.195766	-0.841274	-71.9907		-0.318825	-0.522449	-2.21013	-56.0961		-1.29535	-0.855299	0	-0.0594749	0	-336.622	87.3737	-1254.35
	58	189.141	92.8114	281.952		68.1873	24.6241			58	325.986		-15.5257	-893.278		2078	45.0223	-521.372	11.316	-384.1	0.138427	172.302	0	0.138427	-0.841274	-72.832		-0.318825	-0.522449	-1.96728	-58.0634		-1.0525	-0.855299	0	-0.0594749	0	-336.622	53.6681	-1200.69
	59	188.431	91.388	279.819		65.9673	25.4208			59	330.211		-15.4932	-908.771		2079	36.6589	-484.713	9.67397	-374.426	0.097883	172.4	0	0.097883	-0.841274	-73.6732		-0.318825	-0.522449	-1.77953	-59.843		-0.864758	-0.855299	0	-0.0594749	0	-336.622	43.8099	-1156.88
	60	188.835	90.0444	278.88		63.9849	26.0595			60	334.429		-15.4652	-924.236		2080	29.3588	-455.354	8.40341	-366.022	0.069214	172.469	0	0.069214	-0.841274	-74.5145		-0.318825	-0.522449	-1.63374	-61.4767		-0.718961	-0.855299	0	-0.0594749	0	-336.622	35.3565	-1121.52
	61	190.272	88.7644	279.036		62.1935	26.5709			61	338.64		-15.441	-939.677		2081	22.8921	-432.462	7.41837	-358.604	0.0489419	172.518	0	0.0489419	-0.841274	-75.3558		-0.318825	-0.522449	-1.51998	-62.9967		-0.60521	-0.855299	0	-0.0594749	0	-336.622	27.9982	-1093.52
	62	192.666	87.5359	280.202		60.5572	26.9787			62	342.529		-14.2596	-953.937		2082	17.0904	-415.372	6.65266	-351.951	0.0346074	172.553	0	0.0346074	-0.841274	-76.1971		-0.318825	-0.522449	-1.43079	-64.4275		-0.516016	-0.855299	0	-0.0594749	0	-336.622	21.5057	-1072.02
	63	195.951	86.3493	282.3		59.0477	27.3016			63	346.407		-14.2193	-968.156		2083	11.8309	-403.541	6.05542	-345.896	0.0244713	172.577	0	0.0244713	-0.841274	-77.0383		-0.318825	-0.522449	-1.36048	-65.7879		-0.445704	-0.855299	0	-0.0594749	0	-336.622	15.7091	-1056.31
	64	200.063	85.1975	285.26		57.6432	27.5543			64	350.276		-14.1847	-982.341		2084	7.02363	-396.517	5.58754	-340.308	0.017304	172.594	0	0.017304	-0.841274	-77.8796		-0.318825	-0.522449	-1.30473	-67.0927		-0.389954	-0.855299	0	-0.0594749	0	-336.622	10.4825	-1045.82
	65	204.944	84.0748	289.018		56.3264	27.7484			65	354.136		-14.1547	-996.496		2085	2.60238	-393.915	5.219	-335.089	0.00777596	172.602	0	0.00777596	-1.68255	-79.5621		-0.63765	-1.0449	-0.270627	-67.3633		-0.0778618	-0.192765	0	0	0	-336.622	5.87598	-1039.95
	66	210.537	82.977	293.514		55.0837	27.8932			66	358.007		-14.1943	-1010.69		2086	-1.48191	-395.397	4.92676	-330.163	0.00549854	172.608	0	0.00549854	-1.68255	-81.2447		-0.63765	-1.0449	-0.262573	-67.6259		-0.0698081	-0.192765	0	0	0	-336.622	1.50523	-1038.44
	67	216.792	81.9006	298.692		53.9045	27.996			67	361.578		-13.0916	-1023.78		2087	-5.26639	-400.663	4.69314	-325.469	0.00388815	172.612	0	0.00388815	-1.68255	-82.9272		-0.63765	-1.0449	-0.256054	-67.8819		-0.0632891	-0.192765	0	0	0	-336.622	-2.50796	-1040.95
	68	223.656	80.8432	304.499		52.7802	28.0629			68	365.139		-13.0578	-1036.84		2088	-8.77949	-409.443	4.50457	-320.965	0.00274943	172.614	0	0.00274943	-1.68255	-84.6098		-0.63765	-1.0449	-0.250734	-68.1327		-0.0579691	-0.192765	0	0	0	-336.622	-6.20545	-1047.16
	69	231.081	79.8027	310.884		51.704	28.0988			69	368.692		-13.0286	-1049.87		2089	-12.0439	-421.486	4.35064	-316.614	0.00194423	172.616	0	0.00194423	-1.68255	-86.2923		-0.63765	-1.0449	-0.246353	-68.379		-0.0535887	-0.192765	0	0	0	-336.622	-9.62024	-1056.78
	70	239.02	78.7778	317.797		50.6703	28.1075			70	372.239		-13.0033	-1062.87		2090	-15.0777	-436.564	4.22335	-312.391	0.00137486	172.618	0	0.00137486	-1.68255	-87.9749		-0.63765	-1.0449	-0.242712	-68.6217		-0.0499472	-0.192765	0	0	0	-336.622	-12.7783	-1069.56
	71	231.313	89.8941	321.207	4.95963	56.8177	28.1167			71	375.779		-12.9809	-1075.85		2091	-17.8959	-454.46	4.11656	-308.274	0.000972256	172.619	0	0.000972256	-1.68255	-89.6574		-0.63765	-1.0449	-0.239654	-68.8614		-0.0468889	-0.192765	0	0	0	-336.622	-15.7006	-1085.26
	72	237.694	83.5438	321.238		54.793	28.7508			72	378.979		-11.733	-1087.59		2092	-20.5107	-474.971	4.02554	-304.249	0.000687568	172.619	0	0.000687568	-1.68255	-91.34		-0.63765	-1.0449	-0.237057	-69.0984		-0.0442926	-0.192765	0	0	0	-336.622	-18.4041	-1103.66
	73	244.775	82.256	327.031		53.0851	29.1708			73	382.167		-11.6891	-1099.27		2093	-22.9322	-497.903	3.94668	-300.302	0.000486259	172.62	0	0.000486259	-1.68255	-93.0225		-0.63765	-1.0449	-0.234829	-69.3333		-0.042064	-0.192765	0	0	0	-336.622	-20.9024	-1124.56
	74	252.449	81.0441	333.493		51.6087	29.4354			74	385.344		-11.6509	-1110.93		2094	-25.1684	-523.071	3.87718	-296.425	0.00034391	172.62	0	0.00034391	-1.68255	-94.7051		-0.63765	-1.0449	-0.232894	-69.5662		-0.0401291	-0.192765	0	0	0	-336.622	-23.2063	-1147.77
	75	261.038	79.8894	340.928		50.303	29.5864			75	388.513		-11.6174	-1122.54		2095	-27.2256	-550.297	3.8149	-292.61	0.000243252	172.62	0	0.000243252	-1.68255	-96.3876		-0.63765	-1.0449	-0.231195	-69.7974		-0.0384303	-0.192765	0	0	0	-336.622	-25.3242	-1173.09
	76	269.304	78.7785	348.082		49.1249	29.6536			76	391.673		-11.5877	-1134.13		2096	-29.1086	-579.405	3.75818	-288.852	0.000172074	172.621	0	0.000172074	-1.68255	-98.0702		-0.63765	-1.0449	-0.229687	-70.027		-0.036922	-0.192765	0	0	0	-336.622	-27.2625	-1200.36
	77	277.737	77.7018	355.439		48.0436	29.6582			77	394.647		-10.9046	-1145.03		2097	28.2574	-551.148	-40.7597	-329.612	5.89236	178.513	5.89176	0.000600351	-17.6353	-115.705	-15.9528	-0.63765	-1.0449	-0.853094	-70.8801	-0.880131	0.219802	-0.192765	0	0	0	-336.622	-25.0983	-1225.45
	78	286.315	76.6527	362.967		47.0369	29.6157			78	397.611		-10.8671	-1155.9		2098	-23.3968	-574.545	23.2842	-306.327	8.64165e-05	178.513	0	8.64165e-05	-1.68255	-117.388		-0.63765	-1.0449	-0.265133	-71.1453		-0.0723685	-0.192765	0	0	0	-336.622	-2.06018	-1227.51
	79	295.019	75.6263	370.645		46.0892	29.5371			79	400.565		-10.8334	-1166.74		2099	-25.9644	-600.509	4.72222	-301.605	6.11752e-05	178.513	0	6.11752e-05	-1.68255	-119.071		-0.63765	-1.0449	-0.253813	-71.3991		-0.0610481	-0.192765	0	0	0	-336.622	-23.1785	-1250.69
	80	304.096	74.6192	378.715		45.189	29.4303			80	403.511		-10.8033	-1177.54		2100	-28.1377	-628.647	4.44339	-297.162	4.3325e-05	178.513	0	4.3325e-05	-1.68255	-120.753		-0.63765	-1.0449	-0.245542	-71.6446		-0.0527767	-0.192765	0	0	0	-336.622	-25.6224	-1276.31
	81	313.27	73.6291	386.9		44.328	29.3012			81	406.45		-10.776	-1188.31		2101	-31.493	-660.14	4.23386	-292.928	3.07013e-05	178.513	0	3.07013e-05	-1.68255	-122.436		-0.63765	-1.0449	-0.239438	-71.8841		-0.0466735	-0.192765	0	0	0	-336.622	-29.1811	-1305.5
	82	322.531	72.6543	395.185		43.5002	29.1541			82	408.192		-6.38738	-1194.7		2102	-30.3066	-690.446	4.07344	-288.855	2.17732e-05	178.513	0	2.17732e-05	-1.68255	-124.118		-0.63765	-1.0449	-0.234879	-72.1189		-0.0421142	-0.192765	0	0	0	-336.622	-28.1506	-1333.65
	83	331.867	71.6934	403.56		42.7012	28.9922			83	409.898		-6.2551	-1200.96		2103	-30.9215	-721.368	3.94783	-284.907	1.54585e-05	178.513	0	1.54585e-05	-1.68255	-125.801		-0.63765	-1.0449	-0.231421	-72.3504		-0.0386563	-0.192765	0	0	0	-336.622	-28.8876	-1362.53
	84	341.271	70.7457	412.016		41.9277	28.8179			84	411.573		-6.13887	-1207.1		2104	-31.4525	-752.821	3.84689	-281.06	1.09917e-05	178.513	0	1.09917e-05	-1.68255	-127.483		-0.63765	-1.0449	-0.228751	-72.5791		-0.0359863	-0.192765	0	0	0	-336.622	-29.5169	-1392.05
	85	350.356	69.8104	420.166		41.1772	28.6332			85	413.219		-6.03548	-1213.13		2105	-31.9141	-784.735	3.76347	-277.296	7.83171e-06	178.513	0	7.83171e-06	-1.68255	-129.166		-0.63765	-1.0449	-0.226646	-72.8058		-0.0338814	-0.192765	0	0	0	-336.622	-30.0598	-1422.11
	86	359.492	68.8871	428.379		40.4478	28.4393			86	414.839		-5.94241	-1219.07		2106	-33.2832	-818.018	3.69248	-273.604	5.59576e-06	178.513	0	5.59576e-06	-1.68255	-130.848		-0.63765	-1.0449	-0.224948	-73.0307		-0.0321837	-0.192765	0	0	0	-336.622	-31.4983	-1453.61
	87	368.674	67.9755	436.649		39.738	28.2375			87	416.17		-4.88069	-1223.95		2107	-33.6402	-851.658	3.63034	-269.974	4.01329e-06	178.513	0	4.01329e-06	-1.68255	-132.531		-0.63765	-1.0449	-0.223546	-73.2543		-0.0307811	-0.192765	0	0	0	-336.622	-31.916	-1485.53
	88	377.897	67.0753	444.973		39.0466	28.0287			88	417.475		-4.78507	-1228.74		2108	-33.9547	-885.613	3.57451	-266.399	2.89294e-06	178.513	0	2.89294e-06	-1.68255	-134.214		-0.63765	-1.0449	-0.222358	-73.4766		-0.0295936	-0.192765	0	0	0	-336.622	-32.2851	-1517.81
	89	387.158	66.1864	453.345		38.3727	27.8137			89	418.757		-4.69816	-1233.44		2109	-34.2328	-919.846	3.52318	-262.876	2.09939e-06	178.513	0	2.09939e-06	-1.68255	-135.896		-0.63765	-1.0449	-0.221329	-73.6979		-0.0285645	-0.192765	0	0	0	-336.622	-32.6135	-1550.42
	90	395.722	65.3084	461.03		37.7154	27.5931			90	420.016		-4.61831	-1238.06		2110	-34.4797	-954.325	3.47509	-259.401	1.53698e-06	178.513	0	1.53698e-06	-1.68255	-137.579		-0.63765	-1.0449	-0.220418	-73.9184		-0.0276532	-0.192765	0	0	0	-336.622	-32.9076	-1583.33
	91	404.309	64.4414	468.75		37.074	27.3675			91	421.256		-4.54422	-1242.6		2111	-33.3127	-987.638	3.42934	-255.971	1.13804e-06	178.513	0	1.13804e-06	-1.68255	-139.261		-0.63765	-1.0449	-0.219596	-74.138		-0.0268309	-0.192765	0	0	0	-336.622	-31.7855	-1615.12
	92	412.918	63.5852	476.504		36.4479	27.1373			92	422.476		-4.47498	-1247.08		2112	-33.4991	-1021.14	3.38529	-252.586	8.54733e-07	178.513	0	8.54733e-07	-1.68255	-140.944		-0.63765	-1.0449	-0.218842	-74.3568		-0.0260768	-0.192765	0	0	0	-336.622	-32.0152	-1647.13
	93	421.549	62.7397	484.289		35.8366	26.9032			93	423.679		-4.40976	-1251.48		2113	-33.6674	-1054.8	3.34251	-249.244	6.53225e-07	178.513	0	6.53225e-07	-1.68255	-142.626		-0.63765	-1.0449	-0.218141	-74.5749		-0.025376	-0.192765	0	0	0	-336.622	-32.2256	-1679.36
	94	430.2	61.9048	492.105		35.2395	26.6653			94	424.864		-4.34804	-1255.83		2114	-33.8194	-1088.62	3.30068	-245.943	5.09592e-07	178.513	0	5.09592e-07	-1.68255	-144.309		-0.63765	-1.0449	-0.217483	-74.7924		-0.0247178	-0.192765	0	0	0	-336.622	-32.4187	-1711.78
	95	438.097	61.0805	499.178		34.6563	26.4242			95	426.034		-4.28925	-1260.12		2115	-33.9572	-1122.58	3.25959	-242.683	4.06915e-07	178.513	0	4.06915e-07	-1.68255	-145.991		-0.63765	-1.0449	-0.216859	-75.0093		-0.0240944	-0.192765	0	0	0	-336.622	-32.597	-1744.37
	96	446.003	60.2666	506.269		34.0865	26.1801			96	427.189		-4.23307	-1264.36		2116	-31.3998	-1153.98	3.21907	-239.464	3.33232e-07	178.513	0	3.33232e-07	-1.68255	-147.674		-0.63765	-1.0449	-0.216265	-75.2255		-0.0235001	-0.192765	0	0	0	-336.622	-30.0795	-1774.45
	97	453.917	59.4631	513.38		33.5297	25.9334			97	428.329		-4.1791	-1268.53		2117	-31.4856	-1185.47	3.17904	-236.285	2.8008e-07	178.513	0	2.8008e-07	-1.68255	-149.356		-0.63765	-1.0449	-0.215696	-75.4412		-0.0229308	-0.192765	0	0	0	-336.622	-30.2048	-1804.66
	98	461.841	58.6699	520.511		32.9855	25.6844			98	429.454		-4.12711	-1272.66		2118	-31.5679	-1217.03	3.13941	-233.146	2.41475e-07	178.513	0	2.41475e-07	-1.68255	-151.039		-0.63765	-1.0449	-0.215148	-75.6564		-0.0223832	-0.192765	0	0	0	-336.622	-30.3262	-1834.98
	99	469.775	57.8869	527.662		32.4535	25.4334			99	430.566		-4.07697	-1276.74		2119	-31.646	-1248.68	3.10014	-230.046	2.13186e-07	178.513	0	2.13186e-07	-1.68255	-152.722		-0.63765	-1.0449	-0.21462	-75.871		-0.0218552	-0.192765	0	0	0	-336.622	-30.443	-1865.43
	100	288.179	177.741	465.92	10.907	139.448	27.3859			100	431.665		-4.02836	-1280.77		2120	-31.7194	-1280.4	3.06121	-226.984	1.92218e-07	178.513	0	1.92218e-07	-1.68255	-154.404		-0.63765	-1.0449	-0.21411	-76.0851		-0.0213448	-0.192765	0	0	0	-336.622	-30.5549	-1895.98
																Further Ambition targets scenario
																	7th planting (Mg CO2 eq)																							Plantation (Core)
																Year	Terrestrial C storage		HWP C storage		Forestry/ wood processing emissions (total)		Forestry/ primary wood processing emissions	Secondary wood processing emissions	(BE)CCS (total)		(BE)CCS (primary)	(BE)CCS (secondary)	(BE)CCS (tertiary)	FF offset (total)		Primary electricity offset (biomass + incineration)	Secondary electricity offset (biomass + incineration)	Tertiary electricity offset (biomass + incineration)	Heat offset (biomass)	Heat offset (incineration)	Concrete offset (net)		Net - annual flux	Net - cumulative C sequestration
																	Annual flux	Accumulation	Annual flux	Accumulation	Annual flux	Accumulation			Annual flux	Accumulation				Annual flux	Accumulation						Annual flux	Accumulation
																2020
																2021
																2022
																2023
																2024
																2025
																2026	0	0	0	0	5.00358	5.00358	5.00358	0	0	0	0	0	0	0	0	0	0	0	0	0	0	0	5.00358	5.00358
																2027	0.599623	0.599623	0	0	0	5.00358	0	0	0	0	0	0	0	0	0	0	0	0	0	0	0	0	0.599623	5.6032
																2028	-0.507923	0.0917007	0	0	0	5.00358	0	0	0	0	0	0	0	0	0	0	0	0	0	0	0	0	-0.507923	5.09528
																2029	-1.92493	-1.83323	0	0	0	5.00358	0	0	0	0	0	0	0	0	0	0	0	0	0	0	0	0	-1.92493	3.17035
																2030	-3.55635	-5.38958	0	0	0	5.00358	0	0	0	0	0	0	0	0	0	0	0	0	0	0	0	0	-3.55635	-0.386001
																2031	-5.35193	-10.7415	0	0	0	5.00358	0	0	0	0	0	0	0	0	0	0	0	0	0	0	0	0	-5.35193	-5.73793
																2032	-7.27359	-18.0151	0	0	0	5.00358	0	0	0	0	0	0	0	0	0	0	0	0	0	0	0	0	-7.27359	-13.0115
																2033	-9.28859	-27.3037	0	0	0	5.00358	0	0	0	0	0	0	0	0	0	0	0	0	0	0	0	0	-9.28859	-22.3001
																2034	-11.3672	-38.6709	0	0	0	5.00358	0	0	0	0	0	0	0	0	0	0	0	0	0	0	0	0	-11.3672	-33.6673
																2035	-13.4824	-52.1533	0	0	0	5.00358	0	0	0	0	0	0	0	0	0	0	0	0	0	0	0	0	-13.4824	-47.1497
																2036	-15.6095	-67.7629	0	0	0	5.00358	0	0	0	0	0	0	0	0	0	0	0	0	0	0	0	0	-15.6095	-62.7593
																2037	-17.7267	-85.4896	0	0	0	5.00358	0	0	0	0	0	0	0	0	0	0	0	0	0	0	0	0	-17.7267	-80.486
																2038	-19.8148	-105.304	0	0	0	5.00358	0	0	0	0	0	0	0	0	0	0	0	0	0	0	0	0	-19.8148	-100.301
																2039	-21.8574	-127.162	0	0	0	5.00358	0	0	0	0	0	0	0	0	0	0	0	0	0	0	0	0	-21.8574	-122.158
																2040	-23.8412	-151.003	0	0	0	5.00358	0	0	0	0	0	0	0	0	0	0	0	0	0	0	0	0	-23.8412	-145.999
																2041	-25.7549	-176.758	0	0	0	5.00358	0	0	0	0	0	0	0	0	0	0	0	0	0	0	0	0	-25.7549	-171.754
																2042	-27.5896	-204.347	0	0	0	5.00358	0	0	0	0	0	0	0	0	0	0	0	0	0	0	0	0	-27.5896	-199.344
																2043	-29.338	-233.685	0	0	0	5.00358	0	0	0	0	0	0	0	0	0	0	0	0	0	0	0	0	-29.338	-228.682
																2044	-30.9935	-264.679	0	0	0	5.00358	0	0	0	0	0	0	0	0	0	0	0	0	0	0	0	0	-30.9935	-259.675
																2045	-32.5507	-297.23	0	0	0	5.00358	0	0	0	0	0	0	0	0	0	0	0	0	0	0	0	0	-32.5507	-292.226
																2046	-34.0044	-331.234	0	0	0	5.00358	0	0	0	0	0	0	0	0	0	0	0	0	0	0	0	0	-34.0044	-326.23
																2047	17.6073	-313.627	-24.8113	-24.8113	5.09947	10.103	5.09947	0	-15.866	-15.866	-14.1835	-0.63765	-1.0449	-0.782518	-0.782518	-0.782518	0	0	0	0	0	0	-18.7531	-344.983
																2048	-28.3006	-341.927	2.80517	-22.0061	2.38021e-07	10.103	0	2.38021e-07	-1.68255	-17.5486		-0.63765	-1.0449	-0.226574	-1.00909	0	-0.033809	-0.192765	0	0	0	0	-27.4045	-372.388
																2049	-30.5355	-372.463	0.986722	-21.0194	1.74186e-07	10.103	0	1.74186e-07	-1.68255	-19.2311		-0.63765	-1.0449	-0.217506	-1.2266	0	-0.0247417	-0.192765	0	0	0	0	-31.4488	-403.837
																2050	-32.4275	-404.89	0.778555	-20.2408	5.49641e-08	10.103	0	5.49641e-08	-1.8695	-21.1006		-0.7085	-1.161	0	-1.2266	0	0	0	0	0	0	0	-33.5184	-437.355
																2051	-34.0251	-438.915	0.630603	-19.6102	4.12419e-08	10.103	0	4.12419e-08	-1.8695	-22.9701		-0.7085	-1.161	0	-1.2266	0	0	0	0	0	0	0	-35.264	-472.619
																2052	-36.8851	-475.8	0.52522	-19.085	3.14762e-08	10.103	0	3.14762e-08	-1.8695	-24.8396		-0.7085	-1.161	0	-1.2266	0	0	0	0	0	0	0	-38.2294	-510.849
																2053	-35.2691	-511.07	0.449927	-18.6351	2.45097e-08	10.103	0	2.45097e-08	-1.8695	-26.7091		-0.7085	-1.161	0	-1.2266	0	0	0	0	0	0	0	-36.6886	-547.537
																2054	-35.5086	-546.578	0.395902	-18.2392	1.95244e-08	10.103	0	1.95244e-08	-1.8695	-28.5786		-0.7085	-1.161	0	-1.2266	0	0	0	0	0	0	0	-36.9822	-584.519
																2055	-35.7094	-582.288	0.356909	-17.8823	1.59415e-08	10.103	0	1.59415e-08	-1.8695	-30.4481		-0.7085	-1.161	0	-1.2266	0	0	0	0	0	0	0	-37.222	-621.741
																2056	-35.8788	-618.166	0.328537	-17.5537	1.33519e-08	10.103	0	1.33519e-08	-1.8695	-32.3176		-0.7085	-1.161	0	-1.2266	0	0	0	0	0	0	0	-37.4197	-659.161
																2057	-36.9884	-655.155	0.30767	-17.2461	1.14662e-08	10.103	0	1.14662e-08	-1.8695	-34.1871		-0.7085	-1.161	0	-1.2266	0	0	0	0	0	0	0	-38.5502	-697.711
																2058	-37.1136	-692.268	0.292104	-16.954	1.00797e-08	10.103	0	1.00797e-08	-1.8695	-36.0566		-0.7085	-1.161	0	-1.2266	0	0	0	0	0	0	0	-38.691	-736.402
																2059	-37.2206	-729.489	0.280281	-16.6737	9.04763e-09	10.103	0	9.04763e-09	-1.8695	-37.9261		-0.7085	-1.161	0	-1.2266	0	0	0	0	0	0	0	-38.8098	-775.212
																2060	-37.312	-766.801	0.271101	-16.4026	8.2676e-09	10.103	0	8.2676e-09	-1.8695	-39.7956		-0.7085	-1.161	0	-1.2266	0	0	0	0	0	0	0	-38.9104	-814.123
																2061	-37.3905	-804.191	0.263788	-16.1388	7.66714e-09	10.103	0	7.66714e-09	-1.8695	-41.6651		-0.7085	-1.161	0	-1.2266	0	0	0	0	0	0	0	-38.9962	-853.119
																2062	-36.0712	-840.263	0.257791	-15.881	7.19499e-09	10.103	0	7.19499e-09	-1.8695	-43.5346		-0.7085	-1.161	0	-1.2266	0	0	0	0	0	0	0	-37.6829	-890.802
																2063	-36.1194	-876.382	0.252723	-15.6283	6.81486e-09	10.103	0	6.81486e-09	-1.8695	-45.4041		-0.7085	-1.161	0	-1.2266	0	0	0	0	0	0	0	-37.7362	-928.538
																2064	-36.1622	-912.544	0.24831	-15.38	6.50104e-09	10.103	0	6.50104e-09	-1.8695	-47.2736		-0.7085	-1.161	0	-1.2266	0	0	0	0	0	0	0	-37.7834	-966.321
																2065	-36.1997	-948.744	0.244361	-15.1356	6.23535e-09	10.103	0	6.23535e-09	-1.8695	-49.1431		-0.7085	-1.161	0	-1.2266	0	0	0	0	0	0	0	-37.8248	-1004.15
																2066	-36.2329	-984.977	0.240738	-14.8949	6.00485e-09	10.103	0	6.00485e-09	-1.8695	-51.0126		-0.7085	-1.161	0	-1.2266	0	0	0	0	0	0	0	-37.8616	-1042.01
																2067	-33.5798	-1018.56	0.237346	-14.6575	5.8004e-09	10.103	0	5.8004e-09	-1.8695	-52.8821		-0.7085	-1.161	0	-1.2266	0	0	0	0	0	0	0	-35.212	-1077.22
																2068	-33.5776	-1052.13	0.234119	-14.4234	5.61548e-09	10.103	0	5.61548e-09	-1.8695	-54.7516		-0.7085	-1.161	0	-1.2266	0	0	0	0	0	0	0	-35.213	-1112.43
																2069	-33.5792	-1085.71	0.231009	-14.1924	5.44546e-09	10.103	0	5.44546e-09	-1.8695	-56.6211		-0.7085	-1.161	0	-1.2266	0	0	0	0	0	0	0	-35.2177	-1147.65
																2070	-33.5828	-1119.3	0.227984	-13.9644	5.28704e-09	10.103	0	5.28704e-09	-1.8695	-58.4906		-0.7085	-1.161	0	-1.2266	0	0	0	0	0	0	0	-35.2243	-1182.87
																2071	-33.5875	-1152.88	0.22502	-13.7394	5.13784e-09	10.103	0	5.13784e-09	-1.8695	-60.3601		-0.7085	-1.161	0	-1.2266	0	0	0	0	0	0	0	-35.232	-1218.11
																2072	-30.7614	-1183.65	0.222103	-13.5173	4.99615e-09	10.103	0	4.99615e-09	-1.8695	-62.2296		-0.7085	-1.161	0	-1.2266	0	0	0	0	0	0	0	-32.4088	-1250.52
																2073	-30.732	-1214.38	0.219221	-13.2981	4.86076e-09	10.103	0	4.86076e-09	-1.8695	-64.099		-0.7085	-1.161	0	-1.2266	0	0	0	0	0	0	0	-32.3822	-1282.9
																2074	-30.7102	-1245.09	0.216367	-13.0817	4.73075e-09	10.103	0	4.73075e-09	-1.8695	-65.9685		-0.7085	-1.161	0	-1.2266	0	0	0	0	0	0	0	-32.3634	-1315.26
																2075	-30.6944	-1275.78	0.213536	-12.8682	4.60547e-09	10.103	0	4.60547e-09	-1.8695	-67.838		-0.7085	-1.161	0	-1.2266	0	0	0	0	0	0	0	-32.3503	-1347.61
																2076	654.627	-621.154	-418.017	-430.885	42.9922	53.0952	42.9922	4.60547e-09	-100.956	-168.794	-99.0862	-0.7085	-1.161	-0.00260599	-1.2292	0	0	0	0	-0.00260599	-149.102	-149.102	29.5421	-1318.07
																2077	54.7601	-566.394	35.4692	-395.416	0.0530527	53.1483	0	0.0530527	-1.8695	-170.663		-0.7085	-1.161	-0.00260599	-1.23181		0	0	0	-0.00260599	0	-149.102	88.4103	-1229.66
																2078	45.0223	-521.372	11.316	-384.1	0.0375137	53.1858	0	0.0375137	-1.8695	-172.533		-0.7085	-1.161	-0.00260599	-1.23442		0	0	0	-0.00260599	0	-149.102	54.5036	-1175.16
																2079	36.6589	-484.713	9.67397	-374.426	0.0265263	53.2123	0	0.0265263	-1.8695	-174.402		-0.7085	-1.161	-0.00260599	-1.23702		0	0	0	-0.00260599	0	-149.102	44.4873	-1130.67
																2080	29.3588	-455.354	8.40341	-366.022	0.018757	53.2311	0	0.018757	-1.8695	-176.272		-0.7085	-1.161	-0.00260599	-1.23963		0	0	0	-0.00260599	0	-149.102	35.9089	-1094.76
																2081	22.8921	-432.462	7.41837	-358.604	0.0132633	53.2443	0	0.0132633	-1.8695	-178.141		-0.7085	-1.161	-0.00260599	-1.24223		0	0	0	-0.00260599	0	-149.102	28.4516	-1066.31
																2082	17.0904	-415.372	6.65266	-351.951	0.0093786	53.2537	0	0.0093786	-1.8695	-180.011		-0.7085	-1.161	-0.00260599	-1.24484		0	0	0	-0.00260599	0	-149.102	21.8804	-1044.43
																2083	11.8309	-403.541	6.05542	-345.896	0.00663173	53.2603	0	0.00663173	-1.8695	-181.88		-0.7085	-1.161	-0.00260599	-1.24745		0	0	0	-0.00260599	0	-149.102	16.0209	-1028.41
																2084	7.02363	-396.517	5.58754	-340.308	0.00468939	53.265	0	0.00468939	-1.8695	-183.75		-0.7085	-1.161	-0.00260599	-1.25005		0	0	0	-0.00260599	0	-149.102	10.7438	-1017.66
																2085	2.60238	-393.915	5.219	-335.089	0.00232483	53.2674	0	0.00232483	-1.8695	-185.619		-0.7085	-1.161	0	-1.25005		0	0	0	0	0	-149.102	5.95421	-1011.71
																2086	-1.48191	-395.397	4.92676	-330.163	0.00164394	53.269	0	0.00164394	-1.8695	-187.489		-0.7085	-1.161	0	-1.25005		0	0	0	0	0	-149.102	1.577	-1010.13
																2087	-5.26639	-400.663	4.69314	-325.469	0.00116247	53.2702	0	0.00116247	-1.8695	-189.358		-0.7085	-1.161	0	-1.25005		0	0	0	0	0	-149.102	-2.44158	-1012.57
																2088	-8.77949	-409.443	4.50457	-320.965	0.000822017	53.271	0	0.000822017	-1.8695	-191.228		-0.7085	-1.161	0	-1.25005		0	0	0	0	0	-149.102	-6.14359	-1018.72
																2089	-12.0439	-421.486	4.35064	-316.614	0.00058128	53.2716	0	0.00058128	-1.8695	-193.097		-0.7085	-1.161	0	-1.25005		0	0	0	0	0	-149.102	-9.5622	-1028.28
																2090	-15.0777	-436.564	4.22335	-312.391	0.000411053	53.272	0	0.000411053	-1.8695	-194.967		-0.7085	-1.161	0	-1.25005		0	0	0	0	0	-149.102	-12.7235	-1041
																2091	-17.8959	-454.46	4.11656	-308.274	0.000290682	53.2723	0	0.000290682	-1.8695	-196.836		-0.7085	-1.161	0	-1.25005		0	0	0	0	0	-149.102	-15.6486	-1056.65
																2092	-20.5107	-474.971	4.02554	-304.249	0.000205567	53.2725	0	0.000205567	-1.8695	-198.706		-0.7085	-1.161	0	-1.25005		0	0	0	0	0	-149.102	-18.3545	-1075.01
																2093	-22.9322	-497.903	3.94668	-300.302	0.00014538	53.2726	0	0.00014538	-1.8695	-200.575		-0.7085	-1.161	0	-1.25005		0	0	0	0	0	-149.102	-20.8548	-1095.86
																2094	-25.1684	-523.071	3.87718	-296.425	0.000102821	53.2727	0	0.000102821	-1.8695	-202.445		-0.7085	-1.161	0	-1.25005		0	0	0	0	0	-149.102	-23.1606	-1119.02
																2095	-27.2256	-550.297	3.8149	-292.61	7.27268e-05	53.2728	0	7.27268e-05	-1.8695	-204.314		-0.7085	-1.161	0	-1.25005		0	0	0	0	0	-149.102	-25.2801	-1144.3
																2096	-29.1086	-579.405	3.75818	-288.852	5.14462e-05	53.2728	0	5.14462e-05	-1.8695	-206.184		-0.7085	-1.161	0	-1.25005		0	0	0	0	0	-149.102	-27.2198	-1171.52
																2097	28.2574	-551.148	-40.7597	-329.612	1.76168	55.0345	1.7615	0.000179491	-19.5948	-225.778	-17.7253	-0.7085	-1.161	0	-1.25005	0	0	0	0	0	0	-149.102	-30.3354	-1201.86
																2098	-23.3968	-574.545	23.2842	-306.327	2.58365e-05	55.0346	0	2.58365e-05	-1.8695	-227.648		-0.7085	-1.161	0	-1.25005		0	0	0	0	0	-149.102	-1.98206	-1203.84
																2099	-25.9644	-600.509	4.72222	-301.605	1.829e-05	55.0346	0	1.829e-05	-1.8695	-229.517		-0.7085	-1.161	0	-1.25005		0	0	0	0	0	-149.102	-23.1116	-1226.95
																2100	-28.1377	-628.647	4.44339	-297.162	1.29532e-05	55.0346	0	1.29532e-05	-1.8695	-231.387		-0.7085	-1.161	0	-1.25005		0	0	0	0	0	-149.102	-25.5638	-1252.51
																2101	-31.493	-660.14	4.23386	-292.928	9.17898e-06	55.0346	0	9.17898e-06	-1.8695	-233.256		-0.7085	-1.161	0	-1.25005		0	0	0	0	0	-149.102	-29.1286	-1281.64
																2102	-30.3066	-690.446	4.07344	-288.855	6.5097e-06	55.0346	0	6.5097e-06	-1.8695	-235.126		-0.7085	-1.161	0	-1.25005		0	0	0	0	0	-149.102	-28.1026	-1309.74
																2103	-30.9215	-721.368	3.94783	-284.907	4.62174e-06	55.0346	0	4.62174e-06	-1.8695	-236.995		-0.7085	-1.161	0	-1.25005		0	0	0	0	0	-149.102	-28.8432	-1338.59
																2104	-31.4525	-752.821	3.84689	-281.06	3.28627e-06	55.0346	0	3.28627e-06	-1.8695	-238.865		-0.7085	-1.161	0	-1.25005		0	0	0	0	0	-149.102	-29.4751	-1368.06
																2105	-31.9141	-784.735	3.76347	-277.296	2.3415e-06	55.0346	0	2.3415e-06	-1.8695	-240.734		-0.7085	-1.161	0	-1.25005		0	0	0	0	0	-149.102	-30.0201	-1398.08
																2106	-33.2832	-818.018	3.69248	-273.604	1.67301e-06	55.0346	0	1.67301e-06	-1.8695	-242.604		-0.7085	-1.161	0	-1.25005		0	0	0	0	0	-149.102	-31.4603	-1429.54
																2107	-33.6402	-851.658	3.63034	-269.974	1.19988e-06	55.0346	0	1.19988e-06	-1.8695	-244.473		-0.7085	-1.161	0	-1.25005		0	0	0	0	0	-149.102	-31.8794	-1461.42
																2108	-33.9547	-885.613	3.57451	-266.399	8.64922e-07	55.0346	0	8.64922e-07	-1.8695	-246.343		-0.7085	-1.161	0	-1.25005		0	0	0	0	0	-149.102	-32.2497	-1493.67
																2109	-34.2328	-919.846	3.52318	-262.876	6.2767e-07	55.0346	0	6.2767e-07	-1.8695	-248.212		-0.7085	-1.161	0	-1.25005		0	0	0	0	0	-149.102	-32.5791	-1526.25
																2110	-34.4797	-954.325	3.47509	-259.401	4.59522e-07	55.0346	0	4.59522e-07	-1.8695	-250.082		-0.7085	-1.161	0	-1.25005		0	0	0	0	0	-149.102	-32.8741	-1559.13
																2111	-33.3127	-987.638	3.42934	-255.971	3.40248e-07	55.0346	0	3.40248e-07	-1.8695	-251.951		-0.7085	-1.161	0	-1.25005		0	0	0	0	0	-149.102	-31.7528	-1590.88
																2112	-33.4991	-1021.14	3.38529	-252.586	2.55546e-07	55.0346	0	2.55546e-07	-1.8695	-253.821		-0.7085	-1.161	0	-1.25005		0	0	0	0	0	-149.102	-31.9833	-1622.86
																2113	-33.6674	-1054.8	3.34251	-249.244	1.95299e-07	55.0346	0	1.95299e-07	-1.8695	-255.69		-0.7085	-1.161	0	-1.25005		0	0	0	0	0	-149.102	-32.1944	-1655.06
																2114	-33.8194	-1088.62	3.30068	-245.943	1.52356e-07	55.0346	0	1.52356e-07	-1.8695	-257.56		-0.7085	-1.161	0	-1.25005		0	0	0	0	0	-149.102	-32.3882	-1687.44
																2115	-33.9572	-1122.58	3.25959	-242.683	1.21658e-07	55.0346	0	1.21658e-07	-1.8695	-259.429		-0.7085	-1.161	0	-1.25005		0	0	0	0	0	-149.102	-32.5671	-1720.01
																2116	-31.3998	-1153.98	3.21907	-239.464	9.96288e-08	55.0346	0	9.96288e-08	-1.8695	-261.299		-0.7085	-1.161	0	-1.25005		0	0	0	0	0	-149.102	-30.0502	-1750.06
																2117	-31.4856	-1185.47	3.17904	-236.285	8.37375e-08	55.0346	0	8.37375e-08	-1.8695	-263.168		-0.7085	-1.161	0	-1.25005		0	0	0	0	0	-149.102	-30.1761	-1780.24
																2118	-31.5679	-1217.03	3.13941	-233.146	7.21956e-08	55.0346	0	7.21956e-08	-1.8695	-265.038		-0.7085	-1.161	0	-1.25005		0	0	0	0	0	-149.102	-30.298	-1810.54
																2119	-31.646	-1248.68	3.10014	-230.046	6.37377e-08	55.0346	0	6.37377e-08	-1.8695	-266.907		-0.7085	-1.161	0	-1.25005		0	0	0	0	0	-149.102	-30.4154	-1840.95
																2120	-31.7194	-1280.4	3.06121	-226.984	5.74687e-08	55.0346	0	5.74687e-08	-1.8695	-268.777		-0.7085	-1.161	0	-1.25005		0	0	0	0	0	-149.102	-30.5277	-1871.48

## Sheet: Yr8
																Summary of emissions discounts to apply (to 2020 assumptions):
																	2020-2029		2030-2039		2040-2049		2050-2084		2085-2120
																	Core	FA	Core	FA	Core	FA	Core	FA	Core	FA
																Avoided emissions - Biomass (heat) - marginal supply	none	none	none	none	none	0.25258	0.9	0.039435	0	0
																Avoided emissions - Biomass (electricity) - marginal supply	none	none	0.9127	0.5635	0.8254	0.127	0.5635	0	0.127	0
																Avoided emissions - Incineration (electricity) - marginal supply	none	none	0.9127	0.5635	0.8254	0.127	0.5635	0	0.127	0
																Incineration (heat) - marginal supply	none	none	none	none	none	0	0.9	0.136905	0	0
																C storage - BECCS (biomass electricity)	none	none	0.09	0.45	0.18	0.9	0.45	1	0.9	1
																C storage - BECCS (biomass heat)	none	none	0	0	0	0.405	0	0.81	0.405	0.9
																Avoided emissions - Cement production - CCS application (calcination)	n/a	n/a	n/a	n/a	n/a	n/a	none	0.45568	0.93952	0.3952
																Avoided emissions - Cement production - furnace emissions reduction	n/a	n/a	n/a	n/a	n/a	n/a	0.9784	0.95104	0.95104	0.712
																Emissions - Wood panel (particle board) production (CCS on heat production)	none	none	none	none	none	0.6355	none	0.271	0.6355	0.19
																Emissions - Harvester/forwarder	none	none	none	none	none	0.55	0.87	0.1	0	0
	Annual C stock - total ecosystem (tonnes C) - >75% thin									Natural Forest' C sequestration
	Time Step	Total Ecosystem(GH model (thinned) average soil v3 Default Simu			Thinned	Thinned	Thinned				'Total Ecosystem(Afforestation (conservation) Default Simulation					Core targets scenario
		Forest ecosystem	HWP total	Net system C	Mulch/S C storage	HWP primary	HWP secondary				Net ecosystem C	Process emissions	Annual C flux	Net cumulative C sequestration and storage			8th planting (Mg CO2 eq)																							Plantation (Core)
	Year	Tonnes C	Tonnes C		Tonnes C					Year	Tonnes C		Mg CO2eq			Year	Terrestrial C storage		HWP C storage		Forestry/ wood processing emissions (total)		Forestry/ primary wood processing emissions	Secondary wood processing emissions	(BE)CCS (total)		(BE)CCS (primary)	(BE)CCS (secondary)	(BE)CCS (tertiary)	FF offset (total)		Primary electricity offset (biomass + incineration)	Secondary electricity offset (biomass + incineration)	Tertiary electricity offset (biomass + incineration)	Heat offset (biomass)	Heat offset (incineration)	Concrete offset (net)		Net - annual flux	Net - cumulative C sequestration
																	Annual flux	Accumulation	Annual flux	Accumulation	Annual flux	Accumulation			Annual flux	Accumulation				Annual flux	Accumulation						Annual flux	Accumulation
	0	81	0	81	0	0	0			0						2020
	1	80.8365	0	80.8365		0	0			1						2021
	2	80.975	0	80.975		0	0			2						2022
	3	81.5	0	81.5		0	0			3						2023
	4	82.4699	0	82.4699		0	0			4						2024
	5	83.9295	0	83.9295		0	0			5						2025
	6	85.9132	0	85.9132		0	0			6						2026
	7	88.4465	0	88.4465		0	0			7	81	1.36461	5.00358	5.00358		2027	0	0	0	0	5.00358	5.00358	5.00358	0	0	0	0	0	0	0	0	0	0	0	0	0	0	0	5.00358	5.00358
	8	91.5466	0	91.5466		0	0			8	80.8429		0.575894	5.57947		2028	0.599623	0.599623	0	0	0	5.00358	0	0	0	0	0	0	0	0	0	0	0	0	0	0	0	0	0.599623	5.6032
	9	95.2236	0	95.2236		0	0			9	80.9424		-0.36473	5.21474		2029	-0.507923	0.0917007	0	0	0	5.00358	0	0	0	0	0	0	0	0	0	0	0	0	0	0	0	0	-0.507923	5.09528
	10	99.4808	0	99.4808		0	0			10	81.3393		-1.45544	3.7593		2030	-1.92493	-1.83323	0	0	0	5.00358	0	0	0	0	0	0	0	0	0	0	0	0	0	0	0	0	-1.92493	3.17035
	11	104.315	0	104.315		0	0			11	82.0617		-2.64872	1.11058		2031	-3.55635	-5.38958	0	0	0	5.00358	0	0	0	0	0	0	0	0	0	0	0	0	0	0	0	0	-3.55635	-0.386001
	12	109.719	0	109.719		0	0			12	83.1297		-3.91591	-2.80532		2032	-5.35193	-10.7415	0	0	0	5.00358	0	0	0	0	0	0	0	0	0	0	0	0	0	0	0	0	-5.35193	-5.73793
	13	115.68	0	115.68		0	0			13	84.5573		-5.23457	-8.03989		2033	-7.27359	-18.0151	0	0	0	5.00358	0	0	0	0	0	0	0	0	0	0	0	0	0	0	0	0	-7.27359	-13.0115
	14	122.183	0	122.183		0	0			14	86.3534		-6.58557	-14.6255		2034	-9.28859	-27.3037	0	0	0	5.00358	0	0	0	0	0	0	0	0	0	0	0	0	0	0	0	0	-9.28859	-22.3001
	15	129.207	0	129.207		0	0			15	88.5221		-7.95205	-22.5775		2035	-11.3672	-38.6709	0	0	0	5.00358	0	0	0	0	0	0	0	0	0	0	0	0	0	0	0	0	-11.3672	-33.6673
	16	136.731	0	136.731		0	0			16	91.0637		-9.31896	-31.8965		2036	-13.4824	-52.1533	0	0	0	5.00358	0	0	0	0	0	0	0	0	0	0	0	0	0	0	0	0	-13.4824	-47.1497
	17	144.732	0	144.732		0	0			17	93.9745		-10.673	-42.5695		2037	-15.6095	-67.7629	0	0	0	5.00358	0	0	0	0	0	0	0	0	0	0	0	0	0	0	0	0	-15.6095	-62.7593
	18	153.185	0	153.185		0	0			18	97.2478		-12.0023	-54.5718		2038	-17.7267	-85.4896	0	0	0	5.00358	0	0	0	0	0	0	0	0	0	0	0	0	0	0	0	0	-17.7267	-80.486
	19	162.063	0	162.063		0	0			19	100.874		-13.2969	-67.8687		2039	-19.8148	-105.304	0	0	0	5.00358	0	0	0	0	0	0	0	0	0	0	0	0	0	0	0	0	-19.8148	-100.301
	20	171.337	0	171.337		0	0			20	104.842		-14.548	-82.4167		2040	-21.8574	-127.162	0	0	0	5.00358	0	0	0	0	0	0	0	0	0	0	0	0	0	0	0	0	-21.8574	-122.158
	21	166.535	6.76672	173.301	0.415937	6.35078	0			21	109.137		-15.7483	-98.165		2041	-23.8412	-151.003	0	0	0	5.00358	0	0	0	0	0	0	0	0	0	0	0	0	0	0	0	0	-23.8412	-145.999
	22	174.253	6.00167	180.255		5.40511	0.596564			22	113.744		-16.8918	-115.057		2042	-25.7549	-176.758	0	0	0	5.00358	0	0	0	0	0	0	0	0	0	0	0	0	0	0	0	0	-25.7549	-171.754
	23	182.581	5.73256	188.313		4.71306	1.01951			23	118.646		-17.9733	-133.03		2043	-27.5896	-204.347	0	0	0	5.00358	0	0	0	0	0	0	0	0	0	0	0	0	0	0	0	0	-27.5896	-199.344
	24	191.425	5.52023	196.945		4.20096	1.31927			24	123.824		-18.9887	-152.019		2044	-29.338	-233.685	0	0	0	5.00358	0	0	0	0	0	0	0	0	0	0	0	0	0	0	0	0	-29.338	-228.682
	25	200.704	5.34825	206.052		3.81671	1.53154			25	129.261		-19.9347	-171.953		2045	-30.9935	-264.679	0	0	0	5.00358	0	0	0	0	0	0	0	0	0	0	0	0	0	0	0	0	-30.9935	-259.675
	26	210.764	5.20501	215.969		3.52345	1.68155			26	134.936		-20.8082	-192.762		2046	-32.5507	-297.23	0	0	0	5.00358	0	0	0	0	0	0	0	0	0	0	0	0	0	0	0	0	-32.5507	-292.226
	27	220.383	5.0823	225.465		3.2951	1.7872			27	138.961		-14.7598	-207.521		2047	-34.0044	-331.234	0	0	0	5.00358	0	0	0	0	0	0	0	0	0	0	0	0	0	0	0	0	-34.0044	-326.23
	28	230.067	4.97433	235.041		3.11319	1.86114			28	143.702		-17.382	-224.903		2048	17.6073	-313.627	-24.8113	-24.8113	8.32153	13.3251	8.32153	0	-3.1732	-3.1732	-2.83669	-0.12753	-0.20898	-5.08575	-5.08575	-5.08575	0	0	0	0	0	0	-7.14141	-333.372
	29	239.806	4.87699	244.683		2.96466	1.91232			29	148.506		-17.6139	-242.517		2049	-28.3006	-341.927	2.80517	-22.0061	3.74541e-07	13.3251	0	3.74541e-07	-0.33651	-3.50971		-0.12753	-0.20898	-1.47255	-6.5583	0	-0.219732	-1.25282	0	0	0	0	-27.3045	-360.676
	30	249.591	4.78739	254.378		2.84026	1.94712			30	153.352		-17.7693	-260.287		2050	-30.5355	-372.463	0.986722	-21.0194	2.74092e-07	13.3251	0	2.74092e-07	-0.841274	-4.35099		-0.318825	-0.522449	-0.965078	-7.52338	0	-0.109779	-0.855299	0	0	0	0	-31.3551	-392.031
	31	259.679	4.70348	264.382		2.73343	1.97004			31	159.692		-23.2471	-283.534		2051	-32.4275	-404.89	0.778555	-20.2408	2.0282e-07	13.3251	0	2.0282e-07	-0.841274	-5.19226		-0.318825	-0.522449	-0.936532	-8.45991	0	-0.081233	-0.855299	0	0	0	0	-33.4267	-425.458
	32	269.8	4.62381	274.424		2.63952	1.98429			32	165.832		-22.5139	-306.048		2052	-34.0251	-438.915	0.630603	-19.6102	1.52184e-07	13.3251	0	1.52184e-07	-0.841274	-6.03353		-0.318825	-0.522449	-0.916251	-9.37616	0	-0.0609526	-0.855299	0	0	0	0	-35.1521	-460.61
	33	279.952	4.54737	284.499		2.55523	1.99214			33	175.455		-35.2823	-341.33		2053	-36.8851	-475.8	0.52522	-19.085	1.16148e-07	13.3251	0	1.16148e-07	-0.841274	-6.87481		-0.318825	-0.522449	-0.901818	-10.278	0	-0.0465195	-0.855299	0	0	0	0	-38.103	-498.713
	34	290.127	4.47343	294.601		2.4782	1.99523			34	184.967		-34.8791	-376.209		2054	-35.2691	-511.07	0.449927	-18.6351	9.04419e-08	13.3251	0	9.04419e-08	-0.841274	-7.71608		-0.318825	-0.522449	-0.891522	-11.1695	0	-0.0362236	-0.855299	0	0	0	0	-36.5519	-535.265
	35	300.325	4.40149	304.726		2.40676	1.99473			35	194.39		-34.5515	-410.761		2055	-35.5086	-546.578	0.395902	-18.2392	7.20458e-08	13.3251	0	7.20458e-08	-0.841274	-8.55736		-0.318825	-0.522449	-0.884154	-12.0537	0	-0.0288557	-0.855299	0	0	0	0	-36.8381	-572.103
	36	310.163	4.33118	314.494		2.33973	1.99146			36	203.739		-34.2804	-445.041		2056	-35.7094	-582.288	0.356909	-17.8823	5.88248e-08	13.3251	0	5.88248e-08	-0.841274	-9.39863		-0.318825	-0.522449	-0.878859	-12.9325	0	-0.0235604	-0.855299	0	0	0	0	-37.0726	-609.176
	37	320.013	4.26226	324.276		2.27624	1.98602			37	213.027		-34.0532	-479.094		2057	-35.8788	-618.166	0.328537	-17.5537	4.92691e-08	13.3251	0	4.92691e-08	-0.841274	-10.2399		-0.318825	-0.522449	-0.875032	-13.8075	0	-0.0197332	-0.855299	0	0	0	0	-37.2665	-646.442
	38	329.876	4.19454	334.07		2.21567	1.97887			38	219.105		-22.2888	-501.383		2058	-36.9884	-655.155	0.30767	-17.2461	4.23108e-08	13.3251	0	4.23108e-08	-0.841274	-11.0812		-0.318825	-0.522449	-0.872245	-14.6798	0	-0.0169462	-0.855299	0	0	0	0	-38.3942	-684.837
	39	339.748	4.1279	343.876		2.15757	1.97032			39	225.133		-22.1014	-523.484		2059	-37.1136	-692.268	0.292104	-16.954	3.71945e-08	13.3251	0	3.71945e-08	-0.841274	-11.9225		-0.318825	-0.522449	-0.870196	-15.55	0	-0.0148971	-0.855299	0	0	0	0	-38.533	-723.37
	40	349.63	4.06224	353.692		2.10163	1.96061			40	231.118		-21.9445	-545.429		2060	-37.2206	-729.489	0.280281	-16.6737	3.33861e-08	13.3251	0	3.33861e-08	-0.841274	-12.7637		-0.318825	-0.522449	-0.868671	-16.4187	0	-0.0133718	-0.855299	0	0	0	0	-38.6502	-762.02
	41	358.788	3.99751	362.786		2.04758	1.94993			41	237.067		-21.8117	-567.241		2061	-37.312	-766.801	0.271101	-16.4026	3.05077e-08	13.3251	0	3.05077e-08	-0.841274	-13.605		-0.318825	-0.522449	-0.867518	-17.2862	0	-0.0122189	-0.855299	0	0	0	0	-38.7497	-800.769
	42	367.946	3.93366	371.879		1.99526	1.93839			42	242.985		-21.699	-588.94		2062	-37.3905	-804.191	0.263788	-16.1388	2.8292e-08	13.3251	0	2.8292e-08	-0.841274	-14.4463		-0.318825	-0.522449	-0.86663	-18.1528	0	-0.0113315	-0.855299	0	0	0	0	-38.8346	-839.604
	43	377.104	3.87066	380.974		1.94453	1.92613			43	248.464		-20.0901	-609.03		2063	-36.0712	-840.263	0.257791	-15.881	2.65498e-08	13.3251	0	2.65498e-08	-0.841274	-15.2875		-0.318825	-0.522449	-0.865932	-19.0187	0	-0.0106337	-0.855299	0	0	0	0	-37.5206	-877.125
	44	386.263	3.80848	390.071		1.89527	1.91321			44	253.915		-19.989	-629.019		2064	-36.1194	-876.382	0.252723	-15.6283	2.51471e-08	13.3251	0	2.51471e-08	-0.841274	-16.1288		-0.318825	-0.522449	-0.865371	-19.8841	0	-0.0100719	-0.855299	0	0	0	0	-37.5733	-914.698
	45	395.423	3.74711	399.17		1.8474	1.89971			45	259.343		-19.9032	-648.922		2065	-36.1622	-912.544	0.24831	-15.38	2.39891e-08	13.3251	0	2.39891e-08	-0.841274	-16.9701		-0.318825	-0.522449	-0.864907	-20.749	0	-0.00960808	-0.855299	0	0	0	0	-37.62	-952.318
	46	403.812	3.68654	407.499		1.80085	1.88568			46	264.751		-19.8296	-668.752		2066	-36.1997	-948.744	0.244361	-15.1356	2.30087e-08	13.3251	0	2.30087e-08	-0.841274	-17.8114		-0.318825	-0.522449	-0.864514	-21.6135	0	-0.00921539	-0.855299	0	0	0	0	-37.6611	-989.979
	47	412.194	3.62675	415.82		1.75557	1.87118			47	270.142		-19.7665	-688.518		2067	-36.2329	-984.977	0.240738	-14.8949	2.21581e-08	13.3251	0	2.21581e-08	-0.841274	-18.6526		-0.318825	-0.522449	-0.864174	-22.4777	0	-0.00887474	-0.855299	0	0	0	0	-37.6976	-1027.68
	48	420.569	3.56774	424.137		1.71149	1.85625			48	275.112		-18.2224	-706.74		2068	-33.5798	-1018.56	0.237346	-14.6575	2.14037e-08	13.3251	0	2.14037e-08	-0.841274	-19.4939		-0.318825	-0.522449	-0.863871	-23.3416	0	-0.00857257	-0.855299	0	0	0	0	-35.0476	-1062.72
	49	428.94	3.5095	432.45		1.66858	1.84092			49	280.063		-18.1553	-724.896		2069	-33.5776	-1052.13	0.234119	-14.4234	2.07213e-08	13.3251	0	2.07213e-08	-0.841274	-20.3352		-0.318825	-0.522449	-0.863598	-24.2052	0	-0.00829928	-0.855299	0	0	0	0	-35.0484	-1097.77
	50	250.406	117.514	367.92	8.22192	107.466	1.82594			50	284.999		-18.0982	-742.994		2070	-33.5792	-1085.71	0.231009	-14.1924	2.0094e-08	13.3251	0	2.0094e-08	-0.841274	-21.1765		-0.318825	-0.522449	-0.863347	-25.0685	0	-0.00804801	-0.855299	0	0	0	0	-35.0529	-1132.83
	51	235.471	107.841	343.312		98.6261	9.21454			51	289.924		-18.0569	-761.051		2071	-33.5828	-1119.3	0.227984	-13.9644	1.95094e-08	13.3251	0	1.95094e-08	-0.841274	-22.0177		-0.318825	-0.522449	-0.863113	-25.9316	0	-0.00781386	-0.855299	0	0	0	0	-35.0592	-1167.88
	52	223.192	104.754	327.947		91.5144	13.2401			52	294.838		-18.0171	-779.068		2072	-33.5875	-1152.88	0.22502	-13.7394	1.89588e-08	13.3251	0	1.89588e-08	-0.841274	-22.859		-0.318825	-0.522449	-0.862892	-26.7945	0	-0.00759335	-0.855299	0	0	0	0	-35.0667	-1202.95
	53	213.194	102.116	315.311		85.7258	16.3903			53	299.396		-16.7129	-795.781		2073	-30.7614	-1183.65	0.222103	-13.5173	1.8436e-08	13.3251	0	1.8436e-08	-0.841274	-23.7003		-0.318825	-0.522449	-0.862683	-27.6572	0	-0.00738395	-0.855299	0	0	0	0	-32.2433	-1235.19
	54	205.188	99.8243	305.012		80.9551	18.8692			54	303.94		-16.6615	-812.442		2074	-30.732	-1214.38	0.219221	-13.2981	1.79364e-08	13.3251	0	1.79364e-08	-0.841274	-24.5416		-0.318825	-0.522449	-0.862483	-28.5197	0	-0.00718385	-0.855299	0	0	0	0	-32.2165	-1267.41
	55	198.944	97.8011	296.745		76.9713	20.8298			55	308.472		-16.6177	-829.06		2075	-30.7102	-1245.09	0.216367	-13.0817	1.74566e-08	13.3251	0	1.74566e-08	-0.841274	-25.3828		-0.318825	-0.522449	-0.862291	-29.382	0	-0.00699171	-0.855299	0	0	0	0	-32.1974	-1299.61
	56	194.283	95.9867	290.27		73.5991	22.3876			56	312.994		-16.5804	-845.64		2076	-30.6944	-1275.78	0.213536	-12.8682	1.69943e-08	13.3251	0	1.69943e-08	-0.841274	-26.2241		-0.318825	-0.522449	-0.862105	-30.2441	0	-0.00680655	-0.855299	0	0	0	0	-32.1842	-1331.79
	57	191.057	94.3353	285.392		70.7051	23.6301			57	317.507		-16.5483	-862.189		2077	654.627	-621.154	-418.017	-430.885	158.643	171.968	158.643	1.69943e-08	-45.4301	-71.6542	-44.5888	-0.318825	-0.522449	-23.1934	-53.4375	-22.2718	-0.00680655	-0.855299	0	-0.0594749	-336.622	-336.622	-9.9919	-1341.78
	58	189.141	92.8114	281.952		68.1873	24.6241			58	321.752		-15.5635	-877.752		2078	54.7601	-566.394	35.4692	-395.416	0.195766	172.164	0	0.195766	-0.841274	-72.4954		-0.318825	-0.522449	-2.21013	-55.6476		-1.29535	-0.855299	0	-0.0594749	0	-336.622	87.3737	-1254.41
	59	188.431	91.388	279.819		65.9673	25.4208			59	325.986		-15.5257	-893.278		2079	45.0223	-521.372	11.316	-384.1	0.138427	172.302	0	0.138427	-0.841274	-73.3367		-0.318825	-0.522449	-1.96728	-57.6149		-1.0525	-0.855299	0	-0.0594749	0	-336.622	53.6681	-1200.74
	60	188.835	90.0444	278.88		63.9849	26.0595			60	330.211		-15.4932	-908.771		2080	36.6589	-484.713	9.67397	-374.426	0.097883	172.4	0	0.097883	-0.841274	-74.178		-0.318825	-0.522449	-1.77953	-59.3944		-0.864758	-0.855299	0	-0.0594749	0	-336.622	43.8099	-1156.93
	61	190.272	88.7644	279.036		62.1935	26.5709			61	334.429		-15.4652	-924.236		2081	29.3588	-455.354	8.40341	-366.022	0.069214	172.469	0	0.069214	-0.841274	-75.0193		-0.318825	-0.522449	-1.63374	-61.0282		-0.718961	-0.855299	0	-0.0594749	0	-336.622	35.3565	-1121.58
	62	192.666	87.5359	280.202		60.5572	26.9787			62	338.64		-15.441	-939.677		2082	22.8921	-432.462	7.41837	-358.604	0.0489419	172.518	0	0.0489419	-0.841274	-75.8605		-0.318825	-0.522449	-1.51998	-62.5481		-0.60521	-0.855299	0	-0.0594749	0	-336.622	27.9982	-1093.58
	63	195.951	86.3493	282.3		59.0477	27.3016			63	342.529		-14.2596	-953.937		2083	17.0904	-415.372	6.65266	-351.951	0.0346074	172.553	0	0.0346074	-0.841274	-76.7018		-0.318825	-0.522449	-1.43079	-63.9789		-0.516016	-0.855299	0	-0.0594749	0	-336.622	21.5057	-1072.07
	64	200.063	85.1975	285.26		57.6432	27.5543			64	346.407		-14.2193	-968.156		2084	11.8309	-403.541	6.05542	-345.896	0.0244713	172.577	0	0.0244713	-0.841274	-77.5431		-0.318825	-0.522449	-1.36048	-65.3394		-0.445704	-0.855299	0	-0.0594749	0	-336.622	15.7091	-1056.36
	65	204.944	84.0748	289.018		56.3264	27.7484			65	350.276		-14.1847	-982.341		2085	7.02363	-396.517	5.58754	-340.308	0.0109967	172.588	0	0.0109967	-1.68255	-79.2256		-0.63765	-1.0449	-0.280652	-65.6201		-0.0878868	-0.192765	0	0	0	-336.622	10.659	-1045.7
	66	210.537	82.977	293.514		55.0837	27.8932			66	354.136		-14.1547	-996.496		2086	2.60238	-393.915	5.219	-335.089	0.00777596	172.596	0	0.00777596	-1.68255	-80.9082		-0.63765	-1.0449	-0.270627	-65.8907		-0.0778618	-0.192765	0	0	0	-336.622	5.87598	-1039.83
	67	216.792	81.9006	298.692		53.9045	27.996			67	358.007		-14.1943	-1010.69		2087	-1.48191	-395.397	4.92676	-330.163	0.00549854	172.601	0	0.00549854	-1.68255	-82.5907		-0.63765	-1.0449	-0.262573	-66.1533		-0.0698081	-0.192765	0	0	0	-336.622	1.50523	-1038.32
	68	223.656	80.8432	304.499		52.7802	28.0629			68	361.578		-13.0916	-1023.78		2088	-5.26639	-400.663	4.69314	-325.469	0.00388815	172.605	0	0.00388815	-1.68255	-84.2733		-0.63765	-1.0449	-0.256054	-66.4093		-0.0632891	-0.192765	0	0	0	-336.622	-2.50796	-1040.83
	69	231.081	79.8027	310.884		51.704	28.0988			69	365.139		-13.0578	-1036.84		2089	-8.77949	-409.443	4.50457	-320.965	0.00274943	172.608	0	0.00274943	-1.68255	-85.9558		-0.63765	-1.0449	-0.250734	-66.66		-0.0579691	-0.192765	0	0	0	-336.622	-6.20545	-1047.04
	70	239.02	78.7778	317.797		50.6703	28.1075			70	368.692		-13.0286	-1049.87		2090	-12.0439	-421.486	4.35064	-316.614	0.00194423	172.61	0	0.00194423	-1.68255	-87.6384		-0.63765	-1.0449	-0.246353	-66.9064		-0.0535887	-0.192765	0	0	0	-336.622	-9.62024	-1056.66
	71	231.313	89.8941	321.207	4.95963	56.8177	28.1167			71	372.239		-13.0033	-1062.87		2091	-15.0777	-436.564	4.22335	-312.391	0.00137486	172.611	0	0.00137486	-1.68255	-89.3209		-0.63765	-1.0449	-0.242712	-67.1491		-0.0499472	-0.192765	0	0	0	-336.622	-12.7783	-1069.44
	72	237.694	83.5438	321.238		54.793	28.7508			72	375.779		-12.9809	-1075.85		2092	-17.8959	-454.46	4.11656	-308.274	0.000972256	172.612	0	0.000972256	-1.68255	-91.0035		-0.63765	-1.0449	-0.239654	-67.3888		-0.0468889	-0.192765	0	0	0	-336.622	-15.7006	-1085.14
	73	244.775	82.256	327.031		53.0851	29.1708			73	378.979		-11.733	-1087.59		2093	-20.5107	-474.971	4.02554	-304.249	0.000687568	172.613	0	0.000687568	-1.68255	-92.686		-0.63765	-1.0449	-0.237057	-67.6258		-0.0442926	-0.192765	0	0	0	-336.622	-18.4041	-1103.54
	74	252.449	81.0441	333.493		51.6087	29.4354			74	382.167		-11.6891	-1099.27		2094	-22.9322	-497.903	3.94668	-300.302	0.000486259	172.613	0	0.000486259	-1.68255	-94.3686		-0.63765	-1.0449	-0.234829	-67.8606		-0.042064	-0.192765	0	0	0	-336.622	-20.9024	-1124.44
	75	261.038	79.8894	340.928		50.303	29.5864			75	385.344		-11.6509	-1110.93		2095	-25.1684	-523.071	3.87718	-296.425	0.00034391	172.614	0	0.00034391	-1.68255	-96.0511		-0.63765	-1.0449	-0.232894	-68.0935		-0.0401291	-0.192765	0	0	0	-336.622	-23.2063	-1147.65
	76	269.304	78.7785	348.082		49.1249	29.6536			76	388.513		-11.6174	-1122.54		2096	-27.2256	-550.297	3.8149	-292.61	0.000243252	172.614	0	0.000243252	-1.68255	-97.7337		-0.63765	-1.0449	-0.231195	-68.3247		-0.0384303	-0.192765	0	0	0	-336.622	-25.3242	-1172.97
	77	277.737	77.7018	355.439		48.0436	29.6582			77	391.673		-11.5877	-1134.13		2097	-29.1086	-579.405	3.75818	-288.852	0.000172074	172.614	0	0.000172074	-1.68255	-99.4162		-0.63765	-1.0449	-0.229687	-68.5544		-0.036922	-0.192765	0	0	0	-336.622	-27.2625	-1200.24
	78	286.315	76.6527	362.967		47.0369	29.6157			78	394.647		-10.9046	-1145.03		2098	28.2574	-551.148	-40.7597	-329.612	5.89236	178.507	5.89176	0.000600351	-17.6353	-117.052	-15.9528	-0.63765	-1.0449	-0.853094	-69.4075	-0.880131	0.219802	-0.192765	0	0	0	-336.622	-25.0983	-1225.33
	79	295.019	75.6263	370.645		46.0892	29.5371			79	397.611		-10.8671	-1155.9		2099	-23.3968	-574.545	23.2842	-306.327	8.64165e-05	178.507	0	8.64165e-05	-1.68255	-118.734		-0.63765	-1.0449	-0.265133	-69.6726		-0.0723685	-0.192765	0	0	0	-336.622	-2.06018	-1227.39
	80	304.096	74.6192	378.715		45.189	29.4303			80	400.565		-10.8334	-1166.74		2100	-25.9644	-600.509	4.72222	-301.605	6.11752e-05	178.507	0	6.11752e-05	-1.68255	-120.417		-0.63765	-1.0449	-0.253813	-69.9265		-0.0610481	-0.192765	0	0	0	-336.622	-23.1785	-1250.57
	81	313.27	73.6291	386.9		44.328	29.3012			81	403.511		-10.8033	-1177.54		2101	-28.1377	-628.647	4.44339	-297.162	4.3325e-05	178.507	0	4.3325e-05	-1.68255	-122.099		-0.63765	-1.0449	-0.245542	-70.172		-0.0527767	-0.192765	0	0	0	-336.622	-25.6224	-1276.19
	82	322.531	72.6543	395.185		43.5002	29.1541			82	406.45		-10.776	-1188.31		2102	-31.493	-660.14	4.23386	-292.928	3.07013e-05	178.507	0	3.07013e-05	-1.68255	-123.782		-0.63765	-1.0449	-0.239438	-70.4114		-0.0466735	-0.192765	0	0	0	-336.622	-29.1811	-1305.38
	83	331.867	71.6934	403.56		42.7012	28.9922			83	408.192		-6.38738	-1194.7		2103	-30.3066	-690.446	4.07344	-288.855	2.17732e-05	178.507	0	2.17732e-05	-1.68255	-125.464		-0.63765	-1.0449	-0.234879	-70.6463		-0.0421142	-0.192765	0	0	0	-336.622	-28.1506	-1333.53
	84	341.271	70.7457	412.016		41.9277	28.8179			84	409.898		-6.2551	-1200.96		2104	-30.9215	-721.368	3.94783	-284.907	1.54585e-05	178.507	0	1.54585e-05	-1.68255	-127.147		-0.63765	-1.0449	-0.231421	-70.8777		-0.0386563	-0.192765	0	0	0	-336.622	-28.8876	-1362.41
	85	350.356	69.8104	420.166		41.1772	28.6332			85	411.573		-6.13887	-1207.1		2105	-31.4525	-752.821	3.84689	-281.06	1.09917e-05	178.507	0	1.09917e-05	-1.68255	-128.829		-0.63765	-1.0449	-0.228751	-71.1065		-0.0359863	-0.192765	0	0	0	-336.622	-29.5169	-1391.93
	86	359.492	68.8871	428.379		40.4478	28.4393			86	413.219		-6.03548	-1213.13		2106	-31.9141	-784.735	3.76347	-277.296	7.83171e-06	178.507	0	7.83171e-06	-1.68255	-130.512		-0.63765	-1.0449	-0.226646	-71.3331		-0.0338814	-0.192765	0	0	0	-336.622	-30.0598	-1421.99
	87	368.674	67.9755	436.649		39.738	28.2375			87	414.839		-5.94241	-1219.07		2107	-33.2832	-818.018	3.69248	-273.604	5.59576e-06	178.507	0	5.59576e-06	-1.68255	-132.194		-0.63765	-1.0449	-0.224948	-71.5581		-0.0321837	-0.192765	0	0	0	-336.622	-31.4983	-1453.49
	88	377.897	67.0753	444.973		39.0466	28.0287			88	416.17		-4.88069	-1223.95		2108	-33.6402	-851.658	3.63034	-269.974	4.01329e-06	178.507	0	4.01329e-06	-1.68255	-133.877		-0.63765	-1.0449	-0.223546	-71.7816		-0.0307811	-0.192765	0	0	0	-336.622	-31.916	-1485.4
	89	387.158	66.1864	453.345		38.3727	27.8137			89	417.475		-4.78507	-1228.74		2109	-33.9547	-885.613	3.57451	-266.399	2.89294e-06	178.507	0	2.89294e-06	-1.68255	-135.56		-0.63765	-1.0449	-0.222358	-72.004		-0.0295936	-0.192765	0	0	0	-336.622	-32.2851	-1517.69
	90	395.722	65.3084	461.03		37.7154	27.5931			90	418.757		-4.69816	-1233.44		2110	-34.2328	-919.846	3.52318	-262.876	2.09939e-06	178.507	0	2.09939e-06	-1.68255	-137.242		-0.63765	-1.0449	-0.221329	-72.2253		-0.0285645	-0.192765	0	0	0	-336.622	-32.6135	-1550.3
	91	404.309	64.4414	468.75		37.074	27.3675			91	420.016		-4.61831	-1238.06		2111	-34.4797	-954.325	3.47509	-259.401	1.53698e-06	178.507	0	1.53698e-06	-1.68255	-138.925		-0.63765	-1.0449	-0.220418	-72.4457		-0.0276532	-0.192765	0	0	0	-336.622	-32.9076	-1583.21
	92	412.918	63.5852	476.504		36.4479	27.1373			92	421.256		-4.54422	-1242.6		2112	-33.3127	-987.638	3.42934	-255.971	1.13804e-06	178.507	0	1.13804e-06	-1.68255	-140.607		-0.63765	-1.0449	-0.219596	-72.6653		-0.0268309	-0.192765	0	0	0	-336.622	-31.7855	-1615
	93	421.549	62.7397	484.289		35.8366	26.9032			93	422.476		-4.47498	-1247.08		2113	-33.4991	-1021.14	3.38529	-252.586	8.54733e-07	178.507	0	8.54733e-07	-1.68255	-142.29		-0.63765	-1.0449	-0.218842	-72.8842		-0.0260768	-0.192765	0	0	0	-336.622	-32.0152	-1647.01
	94	430.2	61.9048	492.105		35.2395	26.6653			94	423.679		-4.40976	-1251.48		2114	-33.6674	-1054.8	3.34251	-249.244	6.53225e-07	178.507	0	6.53225e-07	-1.68255	-143.972		-0.63765	-1.0449	-0.218141	-73.1023		-0.025376	-0.192765	0	0	0	-336.622	-32.2256	-1679.24
	95	438.097	61.0805	499.178		34.6563	26.4242			95	424.864		-4.34804	-1255.83		2115	-33.8194	-1088.62	3.30068	-245.943	5.09592e-07	178.507	0	5.09592e-07	-1.68255	-145.655		-0.63765	-1.0449	-0.217483	-73.3198		-0.0247178	-0.192765	0	0	0	-336.622	-32.4187	-1711.66
	96	446.003	60.2666	506.269		34.0865	26.1801			96	426.034		-4.28925	-1260.12		2116	-33.9572	-1122.58	3.25959	-242.683	4.06915e-07	178.507	0	4.06915e-07	-1.68255	-147.337		-0.63765	-1.0449	-0.216859	-73.5367		-0.0240944	-0.192765	0	0	0	-336.622	-32.597	-1744.25
	97	453.917	59.4631	513.38		33.5297	25.9334			97	427.189		-4.23307	-1264.36		2117	-31.3998	-1153.98	3.21907	-239.464	3.33232e-07	178.507	0	3.33232e-07	-1.68255	-149.02		-0.63765	-1.0449	-0.216265	-73.7529		-0.0235001	-0.192765	0	0	0	-336.622	-30.0795	-1774.33
	98	461.841	58.6699	520.511		32.9855	25.6844			98	428.329		-4.1791	-1268.53		2118	-31.4856	-1185.47	3.17904	-236.285	2.8008e-07	178.507	0	2.8008e-07	-1.68255	-150.702		-0.63765	-1.0449	-0.215696	-73.9686		-0.0229308	-0.192765	0	0	0	-336.622	-30.2048	-1804.54
	99	469.775	57.8869	527.662		32.4535	25.4334			99	429.454		-4.12711	-1272.66		2119	-31.5679	-1217.03	3.13941	-233.146	2.41475e-07	178.507	0	2.41475e-07	-1.68255	-152.385		-0.63765	-1.0449	-0.215148	-74.1838		-0.0223832	-0.192765	0	0	0	-336.622	-30.3262	-1834.86
	100	288.179	177.741	465.92	10.907	139.448	27.3859			100	430.566		-4.07697	-1276.74		2120	-31.646	-1248.68	3.10014	-230.046	2.13186e-07	178.507	0	2.13186e-07	-1.68255	-154.068		-0.63765	-1.0449	-0.21462	-74.3984		-0.0218552	-0.192765	0	0	0	-336.622	-30.443	-1865.31
																Further Ambition targets scenario
																	8th planting (Mg CO2 eq)																							Plantation (Core)
																Year	Terrestrial C storage		HWP C storage		Forestry/ wood processing emissions (total)		Forestry/ primary wood processing emissions	Secondary wood processing emissions	(BE)CCS (total)		(BE)CCS (primary)	(BE)CCS (secondary)	(BE)CCS (tertiary)	FF offset (total)		Primary electricity offset (biomass + incineration)	Secondary electricity offset (biomass + incineration)	Tertiary electricity offset (biomass + incineration)	Heat offset (biomass)	Heat offset (incineration)	Concrete offset (net)		Net - annual flux	Net - cumulative C sequestration
																	Annual flux	Accumulation	Annual flux	Accumulation	Annual flux	Accumulation			Annual flux	Accumulation				Annual flux	Accumulation						Annual flux	Accumulation
																2020
																2021
																2022
																2023
																2024
																2025
																2026
																2027	0	0	0	0	5.00358	5.00358	5.00358	0	0	0	0	0	0	0	0	0	0	0	0	0	0	0	5.00358	5.00358
																2028	0.599623	0.599623	0	0	0	5.00358	0	0	0	0	0	0	0	0	0	0	0	0	0	0	0	0	0.599623	5.6032
																2029	-0.507923	0.0917007	0	0	0	5.00358	0	0	0	0	0	0	0	0	0	0	0	0	0	0	0	0	-0.507923	5.09528
																2030	-1.92493	-1.83323	0	0	0	5.00358	0	0	0	0	0	0	0	0	0	0	0	0	0	0	0	0	-1.92493	3.17035
																2031	-3.55635	-5.38958	0	0	0	5.00358	0	0	0	0	0	0	0	0	0	0	0	0	0	0	0	0	-3.55635	-0.386001
																2032	-5.35193	-10.7415	0	0	0	5.00358	0	0	0	0	0	0	0	0	0	0	0	0	0	0	0	0	-5.35193	-5.73793
																2033	-7.27359	-18.0151	0	0	0	5.00358	0	0	0	0	0	0	0	0	0	0	0	0	0	0	0	0	-7.27359	-13.0115
																2034	-9.28859	-27.3037	0	0	0	5.00358	0	0	0	0	0	0	0	0	0	0	0	0	0	0	0	0	-9.28859	-22.3001
																2035	-11.3672	-38.6709	0	0	0	5.00358	0	0	0	0	0	0	0	0	0	0	0	0	0	0	0	0	-11.3672	-33.6673
																2036	-13.4824	-52.1533	0	0	0	5.00358	0	0	0	0	0	0	0	0	0	0	0	0	0	0	0	0	-13.4824	-47.1497
																2037	-15.6095	-67.7629	0	0	0	5.00358	0	0	0	0	0	0	0	0	0	0	0	0	0	0	0	0	-15.6095	-62.7593
																2038	-17.7267	-85.4896	0	0	0	5.00358	0	0	0	0	0	0	0	0	0	0	0	0	0	0	0	0	-17.7267	-80.486
																2039	-19.8148	-105.304	0	0	0	5.00358	0	0	0	0	0	0	0	0	0	0	0	0	0	0	0	0	-19.8148	-100.301
																2040	-21.8574	-127.162	0	0	0	5.00358	0	0	0	0	0	0	0	0	0	0	0	0	0	0	0	0	-21.8574	-122.158
																2041	-23.8412	-151.003	0	0	0	5.00358	0	0	0	0	0	0	0	0	0	0	0	0	0	0	0	0	-23.8412	-145.999
																2042	-25.7549	-176.758	0	0	0	5.00358	0	0	0	0	0	0	0	0	0	0	0	0	0	0	0	0	-25.7549	-171.754
																2043	-27.5896	-204.347	0	0	0	5.00358	0	0	0	0	0	0	0	0	0	0	0	0	0	0	0	0	-27.5896	-199.344
																2044	-29.338	-233.685	0	0	0	5.00358	0	0	0	0	0	0	0	0	0	0	0	0	0	0	0	0	-29.338	-228.682
																2045	-30.9935	-264.679	0	0	0	5.00358	0	0	0	0	0	0	0	0	0	0	0	0	0	0	0	0	-30.9935	-259.675
																2046	-32.5507	-297.23	0	0	0	5.00358	0	0	0	0	0	0	0	0	0	0	0	0	0	0	0	0	-32.5507	-292.226
																2047	-34.0044	-331.234	0	0	0	5.00358	0	0	0	0	0	0	0	0	0	0	0	0	0	0	0	0	-34.0044	-326.23
																2048	17.6073	-313.627	-24.8113	-24.8113	5.09947	10.103	5.09947	0	-15.866	-15.866	-14.1835	-0.63765	-1.0449	-0.782518	-0.782518	-0.782518	0	0	0	0	0	0	-18.7531	-344.983
																2049	-28.3006	-341.927	2.80517	-22.0061	2.38021e-07	10.103	0	2.38021e-07	-1.68255	-17.5486		-0.63765	-1.0449	-0.226574	-1.00909	0	-0.033809	-0.192765	0	0	0	0	-27.4045	-372.388
																2050	-30.5355	-372.463	0.986722	-21.0194	7.4279e-08	10.103	0	7.4279e-08	-1.8695	-19.4181		-0.7085	-1.161	0	-1.00909	0	0	0	0	0	0	0	-31.4182	-403.806
																2051	-32.4275	-404.89	0.778555	-20.2408	5.49641e-08	10.103	0	5.49641e-08	-1.8695	-21.2876		-0.7085	-1.161	0	-1.00909	0	0	0	0	0	0	0	-33.5184	-437.325
																2052	-34.0251	-438.915	0.630603	-19.6102	4.12419e-08	10.103	0	4.12419e-08	-1.8695	-23.1571		-0.7085	-1.161	0	-1.00909	0	0	0	0	0	0	0	-35.264	-472.589
																2053	-36.8851	-475.8	0.52522	-19.085	3.14762e-08	10.103	0	3.14762e-08	-1.8695	-25.0266		-0.7085	-1.161	0	-1.00909	0	0	0	0	0	0	0	-38.2294	-510.818
																2054	-35.2691	-511.07	0.449927	-18.6351	2.45097e-08	10.103	0	2.45097e-08	-1.8695	-26.896		-0.7085	-1.161	0	-1.00909	0	0	0	0	0	0	0	-36.6886	-547.507
																2055	-35.5086	-546.578	0.395902	-18.2392	1.95244e-08	10.103	0	1.95244e-08	-1.8695	-28.7655		-0.7085	-1.161	0	-1.00909	0	0	0	0	0	0	0	-36.9822	-584.489
																2056	-35.7094	-582.288	0.356909	-17.8823	1.59415e-08	10.103	0	1.59415e-08	-1.8695	-30.635		-0.7085	-1.161	0	-1.00909	0	0	0	0	0	0	0	-37.222	-621.711
																2057	-35.8788	-618.166	0.328537	-17.5537	1.33519e-08	10.103	0	1.33519e-08	-1.8695	-32.5045		-0.7085	-1.161	0	-1.00909	0	0	0	0	0	0	0	-37.4197	-659.131
																2058	-36.9884	-655.155	0.30767	-17.2461	1.14662e-08	10.103	0	1.14662e-08	-1.8695	-34.374		-0.7085	-1.161	0	-1.00909	0	0	0	0	0	0	0	-38.5502	-697.681
																2059	-37.1136	-692.268	0.292104	-16.954	1.00797e-08	10.103	0	1.00797e-08	-1.8695	-36.2435		-0.7085	-1.161	0	-1.00909	0	0	0	0	0	0	0	-38.691	-736.372
																2060	-37.2206	-729.489	0.280281	-16.6737	9.04763e-09	10.103	0	9.04763e-09	-1.8695	-38.113		-0.7085	-1.161	0	-1.00909	0	0	0	0	0	0	0	-38.8098	-775.182
																2061	-37.312	-766.801	0.271101	-16.4026	8.2676e-09	10.103	0	8.2676e-09	-1.8695	-39.9825		-0.7085	-1.161	0	-1.00909	0	0	0	0	0	0	0	-38.9104	-814.092
																2062	-37.3905	-804.191	0.263788	-16.1388	7.66714e-09	10.103	0	7.66714e-09	-1.8695	-41.852		-0.7085	-1.161	0	-1.00909	0	0	0	0	0	0	0	-38.9962	-853.088
																2063	-36.0712	-840.263	0.257791	-15.881	7.19499e-09	10.103	0	7.19499e-09	-1.8695	-43.7215		-0.7085	-1.161	0	-1.00909	0	0	0	0	0	0	0	-37.6829	-890.771
																2064	-36.1194	-876.382	0.252723	-15.6283	6.81486e-09	10.103	0	6.81486e-09	-1.8695	-45.591		-0.7085	-1.161	0	-1.00909	0	0	0	0	0	0	0	-37.7362	-928.507
																2065	-36.1622	-912.544	0.24831	-15.38	6.50104e-09	10.103	0	6.50104e-09	-1.8695	-47.4605		-0.7085	-1.161	0	-1.00909	0	0	0	0	0	0	0	-37.7834	-966.291
																2066	-36.1997	-948.744	0.244361	-15.1356	6.23535e-09	10.103	0	6.23535e-09	-1.8695	-49.33		-0.7085	-1.161	0	-1.00909	0	0	0	0	0	0	0	-37.8248	-1004.12
																2067	-36.2329	-984.977	0.240738	-14.8949	6.00485e-09	10.103	0	6.00485e-09	-1.8695	-51.1995		-0.7085	-1.161	0	-1.00909	0	0	0	0	0	0	0	-37.8616	-1041.98
																2068	-33.5798	-1018.56	0.237346	-14.6575	5.8004e-09	10.103	0	5.8004e-09	-1.8695	-53.069		-0.7085	-1.161	0	-1.00909	0	0	0	0	0	0	0	-35.212	-1077.19
																2069	-33.5776	-1052.13	0.234119	-14.4234	5.61548e-09	10.103	0	5.61548e-09	-1.8695	-54.9385		-0.7085	-1.161	0	-1.00909	0	0	0	0	0	0	0	-35.213	-1112.4
																2070	-33.5792	-1085.71	0.231009	-14.1924	5.44546e-09	10.103	0	5.44546e-09	-1.8695	-56.808		-0.7085	-1.161	0	-1.00909	0	0	0	0	0	0	0	-35.2177	-1147.62
																2071	-33.5828	-1119.3	0.227984	-13.9644	5.28704e-09	10.103	0	5.28704e-09	-1.8695	-58.6775		-0.7085	-1.161	0	-1.00909	0	0	0	0	0	0	0	-35.2243	-1182.84
																2072	-33.5875	-1152.88	0.22502	-13.7394	5.13784e-09	10.103	0	5.13784e-09	-1.8695	-60.547		-0.7085	-1.161	0	-1.00909	0	0	0	0	0	0	0	-35.232	-1218.08
																2073	-30.7614	-1183.65	0.222103	-13.5173	4.99615e-09	10.103	0	4.99615e-09	-1.8695	-62.4165		-0.7085	-1.161	0	-1.00909	0	0	0	0	0	0	0	-32.4088	-1250.48
																2074	-30.732	-1214.38	0.219221	-13.2981	4.86076e-09	10.103	0	4.86076e-09	-1.8695	-64.286		-0.7085	-1.161	0	-1.00909	0	0	0	0	0	0	0	-32.3822	-1282.87
																2075	-30.7102	-1245.09	0.216367	-13.0817	4.73075e-09	10.103	0	4.73075e-09	-1.8695	-66.1555		-0.7085	-1.161	0	-1.00909	0	0	0	0	0	0	0	-32.3634	-1315.23
																2076	-30.6944	-1275.78	0.213536	-12.8682	4.60547e-09	10.103	0	4.60547e-09	-1.8695	-68.025		-0.7085	-1.161	0	-1.00909	0	0	0	0	0	0	0	-32.3503	-1347.58
																2077	654.627	-621.154	-418.017	-430.885	42.9922	53.0952	42.9922	4.60547e-09	-100.956	-168.981	-99.0862	-0.7085	-1.161	-0.00260599	-1.0117	0	0	0	0	-0.00260599	-149.102	-149.102	29.5421	-1318.04
																2078	54.7601	-566.394	35.4692	-395.416	0.0530527	53.1483	0	0.0530527	-1.8695	-170.85		-0.7085	-1.161	-0.00260599	-1.0143		0	0	0	-0.00260599	0	-149.102	88.4103	-1229.63
																2079	45.0223	-521.372	11.316	-384.1	0.0375137	53.1858	0	0.0375137	-1.8695	-172.72		-0.7085	-1.161	-0.00260599	-1.01691		0	0	0	-0.00260599	0	-149.102	54.5036	-1175.12
																2080	36.6589	-484.713	9.67397	-374.426	0.0265263	53.2123	0	0.0265263	-1.8695	-174.589		-0.7085	-1.161	-0.00260599	-1.01952		0	0	0	-0.00260599	0	-149.102	44.4873	-1130.64
																2081	29.3588	-455.354	8.40341	-366.022	0.018757	53.2311	0	0.018757	-1.8695	-176.459		-0.7085	-1.161	-0.00260599	-1.02212		0	0	0	-0.00260599	0	-149.102	35.9089	-1094.73
																2082	22.8921	-432.462	7.41837	-358.604	0.0132633	53.2443	0	0.0132633	-1.8695	-178.328		-0.7085	-1.161	-0.00260599	-1.02473		0	0	0	-0.00260599	0	-149.102	28.4516	-1066.28
																2083	17.0904	-415.372	6.65266	-351.951	0.0093786	53.2537	0	0.0093786	-1.8695	-180.198		-0.7085	-1.161	-0.00260599	-1.02733		0	0	0	-0.00260599	0	-149.102	21.8804	-1044.4
																2084	11.8309	-403.541	6.05542	-345.896	0.00663173	53.2603	0	0.00663173	-1.8695	-182.067		-0.7085	-1.161	-0.00260599	-1.02994		0	0	0	-0.00260599	0	-149.102	16.0209	-1028.38
																2085	7.02363	-396.517	5.58754	-340.308	0.00328777	53.2636	0	0.00328777	-1.8695	-183.937		-0.7085	-1.161	0	-1.02994		0	0	0	0	0	-149.102	10.745	-1017.63
																2086	2.60238	-393.915	5.219	-335.089	0.00232483	53.266	0	0.00232483	-1.8695	-185.806		-0.7085	-1.161	0	-1.02994		0	0	0	0	0	-149.102	5.95421	-1011.68
																2087	-1.48191	-395.397	4.92676	-330.163	0.00164394	53.2676	0	0.00164394	-1.8695	-187.676		-0.7085	-1.161	0	-1.02994		0	0	0	0	0	-149.102	1.577	-1010.1
																2088	-5.26639	-400.663	4.69314	-325.469	0.00116247	53.2688	0	0.00116247	-1.8695	-189.545		-0.7085	-1.161	0	-1.02994		0	0	0	0	0	-149.102	-2.44158	-1012.54
																2089	-8.77949	-409.443	4.50457	-320.965	0.000822017	53.2696	0	0.000822017	-1.8695	-191.415		-0.7085	-1.161	0	-1.02994		0	0	0	0	0	-149.102	-6.14359	-1018.68
																2090	-12.0439	-421.486	4.35064	-316.614	0.00058128	53.2702	0	0.00058128	-1.8695	-193.284		-0.7085	-1.161	0	-1.02994		0	0	0	0	0	-149.102	-9.5622	-1028.25
																2091	-15.0777	-436.564	4.22335	-312.391	0.000411053	53.2706	0	0.000411053	-1.8695	-195.154		-0.7085	-1.161	0	-1.02994		0	0	0	0	0	-149.102	-12.7235	-1040.97
																2092	-17.8959	-454.46	4.11656	-308.274	0.000290682	53.2709	0	0.000290682	-1.8695	-197.023		-0.7085	-1.161	0	-1.02994		0	0	0	0	0	-149.102	-15.6486	-1056.62
																2093	-20.5107	-474.971	4.02554	-304.249	0.000205567	53.2711	0	0.000205567	-1.8695	-198.893		-0.7085	-1.161	0	-1.02994		0	0	0	0	0	-149.102	-18.3545	-1074.97
																2094	-22.9322	-497.903	3.94668	-300.302	0.00014538	53.2712	0	0.00014538	-1.8695	-200.762		-0.7085	-1.161	0	-1.02994		0	0	0	0	0	-149.102	-20.8548	-1095.83
																2095	-25.1684	-523.071	3.87718	-296.425	0.000102821	53.2713	0	0.000102821	-1.8695	-202.632		-0.7085	-1.161	0	-1.02994		0	0	0	0	0	-149.102	-23.1606	-1118.99
																2096	-27.2256	-550.297	3.8149	-292.61	7.27268e-05	53.2714	0	7.27268e-05	-1.8695	-204.501		-0.7085	-1.161	0	-1.02994		0	0	0	0	0	-149.102	-25.2801	-1144.27
																2097	-29.1086	-579.405	3.75818	-288.852	5.14462e-05	53.2714	0	5.14462e-05	-1.8695	-206.371		-0.7085	-1.161	0	-1.02994		0	0	0	0	0	-149.102	-27.2198	-1171.49
																2098	28.2574	-551.148	-40.7597	-329.612	1.76168	55.0331	1.7615	0.000179491	-19.5948	-225.965	-17.7253	-0.7085	-1.161	0	-1.02994	0	0	0	0	0	0	-149.102	-30.3354	-1201.82
																2099	-23.3968	-574.545	23.2842	-306.327	2.58365e-05	55.0332	0	2.58365e-05	-1.8695	-227.835		-0.7085	-1.161	0	-1.02994		0	0	0	0	0	-149.102	-1.98206	-1203.81
																2100	-25.9644	-600.509	4.72222	-301.605	1.829e-05	55.0332	0	1.829e-05	-1.8695	-229.704		-0.7085	-1.161	0	-1.02994		0	0	0	0	0	-149.102	-23.1116	-1226.92
																2101	-28.1377	-628.647	4.44339	-297.162	1.29532e-05	55.0332	0	1.29532e-05	-1.8695	-231.574		-0.7085	-1.161	0	-1.02994		0	0	0	0	0	-149.102	-25.5638	-1252.48
																2102	-31.493	-660.14	4.23386	-292.928	9.17898e-06	55.0332	0	9.17898e-06	-1.8695	-233.443		-0.7085	-1.161	0	-1.02994		0	0	0	0	0	-149.102	-29.1286	-1281.61
																2103	-30.3066	-690.446	4.07344	-288.855	6.5097e-06	55.0332	0	6.5097e-06	-1.8695	-235.313		-0.7085	-1.161	0	-1.02994		0	0	0	0	0	-149.102	-28.1026	-1309.71
																2104	-30.9215	-721.368	3.94783	-284.907	4.62174e-06	55.0332	0	4.62174e-06	-1.8695	-237.182		-0.7085	-1.161	0	-1.02994		0	0	0	0	0	-149.102	-28.8432	-1338.56
																2105	-31.4525	-752.821	3.84689	-281.06	3.28627e-06	55.0332	0	3.28627e-06	-1.8695	-239.052		-0.7085	-1.161	0	-1.02994		0	0	0	0	0	-149.102	-29.4751	-1368.03
																2106	-31.9141	-784.735	3.76347	-277.296	2.3415e-06	55.0332	0	2.3415e-06	-1.8695	-240.921		-0.7085	-1.161	0	-1.02994		0	0	0	0	0	-149.102	-30.0201	-1398.05
																2107	-33.2832	-818.018	3.69248	-273.604	1.67301e-06	55.0332	0	1.67301e-06	-1.8695	-242.791		-0.7085	-1.161	0	-1.02994		0	0	0	0	0	-149.102	-31.4603	-1429.51
																2108	-33.6402	-851.658	3.63034	-269.974	1.19988e-06	55.0332	0	1.19988e-06	-1.8695	-244.66		-0.7085	-1.161	0	-1.02994		0	0	0	0	0	-149.102	-31.8794	-1461.39
																2109	-33.9547	-885.613	3.57451	-266.399	8.64922e-07	55.0332	0	8.64922e-07	-1.8695	-246.53		-0.7085	-1.161	0	-1.02994		0	0	0	0	0	-149.102	-32.2497	-1493.64
																2110	-34.2328	-919.846	3.52318	-262.876	6.2767e-07	55.0332	0	6.2767e-07	-1.8695	-248.399		-0.7085	-1.161	0	-1.02994		0	0	0	0	0	-149.102	-32.5791	-1526.22
																2111	-34.4797	-954.325	3.47509	-259.401	4.59522e-07	55.0332	0	4.59522e-07	-1.8695	-250.269		-0.7085	-1.161	0	-1.02994		0	0	0	0	0	-149.102	-32.8741	-1559.09
																2112	-33.3127	-987.638	3.42934	-255.971	3.40248e-07	55.0332	0	3.40248e-07	-1.8695	-252.138		-0.7085	-1.161	0	-1.02994		0	0	0	0	0	-149.102	-31.7528	-1590.85
																2113	-33.4991	-1021.14	3.38529	-252.586	2.55546e-07	55.0332	0	2.55546e-07	-1.8695	-254.008		-0.7085	-1.161	0	-1.02994		0	0	0	0	0	-149.102	-31.9833	-1622.83
																2114	-33.6674	-1054.8	3.34251	-249.244	1.95299e-07	55.0332	0	1.95299e-07	-1.8695	-255.877		-0.7085	-1.161	0	-1.02994		0	0	0	0	0	-149.102	-32.1944	-1655.02
																2115	-33.8194	-1088.62	3.30068	-245.943	1.52356e-07	55.0332	0	1.52356e-07	-1.8695	-257.747		-0.7085	-1.161	0	-1.02994		0	0	0	0	0	-149.102	-32.3882	-1687.41
																2116	-33.9572	-1122.58	3.25959	-242.683	1.21658e-07	55.0332	0	1.21658e-07	-1.8695	-259.616		-0.7085	-1.161	0	-1.02994		0	0	0	0	0	-149.102	-32.5671	-1719.98
																2117	-31.3998	-1153.98	3.21907	-239.464	9.96288e-08	55.0332	0	9.96288e-08	-1.8695	-261.486		-0.7085	-1.161	0	-1.02994		0	0	0	0	0	-149.102	-30.0502	-1750.03
																2118	-31.4856	-1185.47	3.17904	-236.285	8.37375e-08	55.0332	0	8.37375e-08	-1.8695	-263.355		-0.7085	-1.161	0	-1.02994		0	0	0	0	0	-149.102	-30.1761	-1780.21
																2119	-31.5679	-1217.03	3.13941	-233.146	7.21956e-08	55.0332	0	7.21956e-08	-1.8695	-265.225		-0.7085	-1.161	0	-1.02994		0	0	0	0	0	-149.102	-30.298	-1810.5
																2120	-31.646	-1248.68	3.10014	-230.046	6.37377e-08	55.0332	0	6.37377e-08	-1.8695	-267.094		-0.7085	-1.161	0	-1.02994		0	0	0	0	0	-149.102	-30.4154	-1840.92

## Sheet: Yr9
																Summary of emissions discounts to apply (to 2020 assumptions):
																	2020-2029		2030-2039		2040-2049		2050-2084		2085-2120
																	Core	FA	Core	FA	Core	FA	Core	FA	Core	FA
																Avoided emissions - Biomass (heat) - marginal supply	none	none	none	none	none	0.25258	0.9	0.039435	0	0
																Avoided emissions - Biomass (electricity) - marginal supply	none	none	0.9127	0.5635	0.8254	0.127	0.5635	0	0.127	0
																Avoided emissions - Incineration (electricity) - marginal supply	none	none	0.9127	0.5635	0.8254	0.127	0.5635	0	0.127	0
																Incineration (heat) - marginal supply	none	none	none	none	none	0	0.9	0.136905	0	0
																C storage - BECCS (biomass electricity)	none	none	0.09	0.45	0.18	0.9	0.45	1	0.9	1
																C storage - BECCS (biomass heat)	none	none	0	0	0	0.405	0	0.81	0.405	0.9
																Avoided emissions - Cement production - CCS application (calcination)	n/a	n/a	n/a	n/a	n/a	n/a	none	0.45568	0.93952	0.3952
																Avoided emissions - Cement production - furnace emissions reduction	n/a	n/a	n/a	n/a	n/a	n/a	0.9784	0.95104	0.95104	0.712
																Emissions - Wood panel (particle board) production (CCS on heat production)	none	none	none	none	none	0.6355	none	0.271	0.6355	0.19
																Emissions - Harvester/forwarder	none	none	none	none	none	0.55	0.87	0.1	0	0
	Annual C stock - total ecosystem (tonnes C) - >75% thin									Natural Forest' C sequestration
	Time Step	Total Ecosystem(GH model (thinned) average soil v3 Default Simu			Thinned	Thinned	Thinned				'Total Ecosystem(Afforestation (conservation) Default Simulation					Core targets scenario
		Forest ecosystem	HWP total	Net system C	Mulch/S C storage	HWP primary	HWP secondary				Net ecosystem C	Process emissions	Annual C flux	Net cumulative C sequestration and storage			9th planting (Mg CO2 eq)																							Plantation (Core)
	Year	Tonnes C	Tonnes C		Tonnes C					Year	Tonnes C		Mg CO2eq			Year	Terrestrial C storage		HWP C storage		Forestry/ wood processing emissions (total)		Forestry/ primary wood processing emissions	Secondary wood processing emissions	(BE)CCS (total)		(BE)CCS (primary)	(BE)CCS (secondary)	(BE)CCS (tertiary)	FF offset (total)		Primary electricity offset (biomass + incineration)	Secondary electricity offset (biomass + incineration)	Tertiary electricity offset (biomass + incineration)	Heat offset (biomass)	Heat offset (incineration)	Concrete offset (net)		Net - annual flux	Net - cumulative C sequestration
																	Annual flux	Accumulation	Annual flux	Accumulation	Annual flux	Accumulation			Annual flux	Accumulation				Annual flux	Accumulation						Annual flux	Accumulation
	0	81	0	81	0	0	0			0						2020
	1	80.8365	0	80.8365		0	0			1						2021
	2	80.975	0	80.975		0	0			2						2022
	3	81.5	0	81.5		0	0			3						2023
	4	82.4699	0	82.4699		0	0			4						2024
	5	83.9295	0	83.9295		0	0			5						2025
	6	85.9132	0	85.9132		0	0			6						2026
	7	88.4465	0	88.4465		0	0			7						2027
	8	91.5466	0	91.5466		0	0			8	81	1.36461	5.00358	5.00358		2028	0	0	0	0	5.00358	5.00358	5.00358	0	0	0	0	0	0	0	0	0	0	0	0	0	0	0	5.00358	5.00358
	9	95.2236	0	95.2236		0	0			9	80.8429		0.575894	5.57947		2029	0.599623	0.599623	0	0	0	5.00358	0	0	0	0	0	0	0	0	0	0	0	0	0	0	0	0	0.599623	5.6032
	10	99.4808	0	99.4808		0	0			10	80.9424		-0.36473	5.21474		2030	-0.507923	0.0917007	0	0	0	5.00358	0	0	0	0	0	0	0	0	0	0	0	0	0	0	0	0	-0.507923	5.09528
	11	104.315	0	104.315		0	0			11	81.3393		-1.45544	3.7593		2031	-1.92493	-1.83323	0	0	0	5.00358	0	0	0	0	0	0	0	0	0	0	0	0	0	0	0	0	-1.92493	3.17035
	12	109.719	0	109.719		0	0			12	82.0617		-2.64872	1.11058		2032	-3.55635	-5.38958	0	0	0	5.00358	0	0	0	0	0	0	0	0	0	0	0	0	0	0	0	0	-3.55635	-0.386001
	13	115.68	0	115.68		0	0			13	83.1297		-3.91591	-2.80532		2033	-5.35193	-10.7415	0	0	0	5.00358	0	0	0	0	0	0	0	0	0	0	0	0	0	0	0	0	-5.35193	-5.73793
	14	122.183	0	122.183		0	0			14	84.5573		-5.23457	-8.03989		2034	-7.27359	-18.0151	0	0	0	5.00358	0	0	0	0	0	0	0	0	0	0	0	0	0	0	0	0	-7.27359	-13.0115
	15	129.207	0	129.207		0	0			15	86.3534		-6.58557	-14.6255		2035	-9.28859	-27.3037	0	0	0	5.00358	0	0	0	0	0	0	0	0	0	0	0	0	0	0	0	0	-9.28859	-22.3001
	16	136.731	0	136.731		0	0			16	88.5221		-7.95205	-22.5775		2036	-11.3672	-38.6709	0	0	0	5.00358	0	0	0	0	0	0	0	0	0	0	0	0	0	0	0	0	-11.3672	-33.6673
	17	144.732	0	144.732		0	0			17	91.0637		-9.31896	-31.8965		2037	-13.4824	-52.1533	0	0	0	5.00358	0	0	0	0	0	0	0	0	0	0	0	0	0	0	0	0	-13.4824	-47.1497
	18	153.185	0	153.185		0	0			18	93.9745		-10.673	-42.5695		2038	-15.6095	-67.7629	0	0	0	5.00358	0	0	0	0	0	0	0	0	0	0	0	0	0	0	0	0	-15.6095	-62.7593
	19	162.063	0	162.063		0	0			19	97.2478		-12.0023	-54.5718		2039	-17.7267	-85.4896	0	0	0	5.00358	0	0	0	0	0	0	0	0	0	0	0	0	0	0	0	0	-17.7267	-80.486
	20	171.337	0	171.337		0	0			20	100.874		-13.2969	-67.8687		2040	-19.8148	-105.304	0	0	0	5.00358	0	0	0	0	0	0	0	0	0	0	0	0	0	0	0	0	-19.8148	-100.301
	21	166.535	6.76672	173.301	0.415937	6.35078	0			21	104.842		-14.548	-82.4167		2041	-21.8574	-127.162	0	0	0	5.00358	0	0	0	0	0	0	0	0	0	0	0	0	0	0	0	0	-21.8574	-122.158
	22	174.253	6.00167	180.255		5.40511	0.596564			22	109.137		-15.7483	-98.165		2042	-23.8412	-151.003	0	0	0	5.00358	0	0	0	0	0	0	0	0	0	0	0	0	0	0	0	0	-23.8412	-145.999
	23	182.581	5.73256	188.313		4.71306	1.01951			23	113.744		-16.8918	-115.057		2043	-25.7549	-176.758	0	0	0	5.00358	0	0	0	0	0	0	0	0	0	0	0	0	0	0	0	0	-25.7549	-171.754
	24	191.425	5.52023	196.945		4.20096	1.31927			24	118.646		-17.9733	-133.03		2044	-27.5896	-204.347	0	0	0	5.00358	0	0	0	0	0	0	0	0	0	0	0	0	0	0	0	0	-27.5896	-199.344
	25	200.704	5.34825	206.052		3.81671	1.53154			25	123.824		-18.9887	-152.019		2045	-29.338	-233.685	0	0	0	5.00358	0	0	0	0	0	0	0	0	0	0	0	0	0	0	0	0	-29.338	-228.682
	26	210.764	5.20501	215.969		3.52345	1.68155			26	129.261		-19.9347	-171.953		2046	-30.9935	-264.679	0	0	0	5.00358	0	0	0	0	0	0	0	0	0	0	0	0	0	0	0	0	-30.9935	-259.675
	27	220.383	5.0823	225.465		3.2951	1.7872			27	134.936		-20.8082	-192.762		2047	-32.5507	-297.23	0	0	0	5.00358	0	0	0	0	0	0	0	0	0	0	0	0	0	0	0	0	-32.5507	-292.226
	28	230.067	4.97433	235.041		3.11319	1.86114			28	138.961		-14.7598	-207.521		2048	-34.0044	-331.234	0	0	0	5.00358	0	0	0	0	0	0	0	0	0	0	0	0	0	0	0	0	-34.0044	-326.23
	29	239.806	4.87699	244.683		2.96466	1.91232			29	143.702		-17.382	-224.903		2049	17.6073	-313.627	-24.8113	-24.8113	8.32153	13.3251	8.32153	0	-3.1732	-3.1732	-2.83669	-0.12753	-0.20898	-5.08575	-5.08575	-5.08575	0	0	0	0	0	0	-7.14141	-333.372
	30	249.591	4.78739	254.378		2.84026	1.94712			30	148.506		-17.6139	-242.517		2050	-28.3006	-341.927	2.80517	-22.0061	3.74541e-07	13.3251	0	3.74541e-07	-0.841274	-4.01448		-0.318825	-0.522449	-1.00531	-6.09106	0	-0.150011	-0.855299	0	0	0	0	-27.342	-360.714
	31	259.679	4.70348	264.382		2.73343	1.97004			31	153.352		-17.7693	-260.287		2051	-30.5355	-372.463	0.986722	-21.0194	2.74092e-07	13.3251	0	2.74092e-07	-0.841274	-4.85575		-0.318825	-0.522449	-0.965078	-7.05614	0	-0.109779	-0.855299	0	0	0	0	-31.3551	-392.069
	32	269.8	4.62381	274.424		2.63952	1.98429			32	159.692		-23.2471	-283.534		2052	-32.4275	-404.89	0.778555	-20.2408	2.0282e-07	13.3251	0	2.0282e-07	-0.841274	-5.69702		-0.318825	-0.522449	-0.936532	-7.99267	0	-0.081233	-0.855299	0	0	0	0	-33.4267	-425.496
	33	279.952	4.54737	284.499		2.55523	1.99214			33	165.832		-22.5139	-306.048		2053	-34.0251	-438.915	0.630603	-19.6102	1.52184e-07	13.3251	0	1.52184e-07	-0.841274	-6.5383		-0.318825	-0.522449	-0.916251	-8.90892	0	-0.0609526	-0.855299	0	0	0	0	-35.1521	-460.648
	34	290.127	4.47343	294.601		2.4782	1.99523			34	175.455		-35.2823	-341.33		2054	-36.8851	-475.8	0.52522	-19.085	1.16148e-07	13.3251	0	1.16148e-07	-0.841274	-7.37957		-0.318825	-0.522449	-0.901818	-9.81074	0	-0.0465195	-0.855299	0	0	0	0	-38.103	-498.751
	35	300.325	4.40149	304.726		2.40676	1.99473			35	184.967		-34.8791	-376.209		2055	-35.2691	-511.07	0.449927	-18.6351	9.04419e-08	13.3251	0	9.04419e-08	-0.841274	-8.22085		-0.318825	-0.522449	-0.891522	-10.7023	0	-0.0362236	-0.855299	0	0	0	0	-36.5519	-535.303
	36	310.163	4.33118	314.494		2.33973	1.99146			36	194.39		-34.5515	-410.761		2056	-35.5086	-546.578	0.395902	-18.2392	7.20458e-08	13.3251	0	7.20458e-08	-0.841274	-9.06212		-0.318825	-0.522449	-0.884154	-11.5864	0	-0.0288557	-0.855299	0	0	0	0	-36.8381	-572.141
	37	320.013	4.26226	324.276		2.27624	1.98602			37	203.739		-34.2804	-445.041		2057	-35.7094	-582.288	0.356909	-17.8823	5.88248e-08	13.3251	0	5.88248e-08	-0.841274	-9.90339		-0.318825	-0.522449	-0.878859	-12.4653	0	-0.0235604	-0.855299	0	0	0	0	-37.0726	-609.213
	38	329.876	4.19454	334.07		2.21567	1.97887			38	213.027		-34.0532	-479.094		2058	-35.8788	-618.166	0.328537	-17.5537	4.92691e-08	13.3251	0	4.92691e-08	-0.841274	-10.7447		-0.318825	-0.522449	-0.875032	-13.3403	0	-0.0197332	-0.855299	0	0	0	0	-37.2665	-646.48
	39	339.748	4.1279	343.876		2.15757	1.97032			39	219.105		-22.2888	-501.383		2059	-36.9884	-655.155	0.30767	-17.2461	4.23108e-08	13.3251	0	4.23108e-08	-0.841274	-11.5859		-0.318825	-0.522449	-0.872245	-14.2126	0	-0.0169462	-0.855299	0	0	0	0	-38.3942	-684.874
	40	349.63	4.06224	353.692		2.10163	1.96061			40	225.133		-22.1014	-523.484		2060	-37.1136	-692.268	0.292104	-16.954	3.71945e-08	13.3251	0	3.71945e-08	-0.841274	-12.4272		-0.318825	-0.522449	-0.870196	-15.0827	0	-0.0148971	-0.855299	0	0	0	0	-38.533	-723.407
	41	358.788	3.99751	362.786		2.04758	1.94993			41	231.118		-21.9445	-545.429		2061	-37.2206	-729.489	0.280281	-16.6737	3.33861e-08	13.3251	0	3.33861e-08	-0.841274	-13.2685		-0.318825	-0.522449	-0.868671	-15.9514	0	-0.0133718	-0.855299	0	0	0	0	-38.6502	-762.057
	42	367.946	3.93366	371.879		1.99526	1.93839			42	237.067		-21.8117	-567.241		2062	-37.312	-766.801	0.271101	-16.4026	3.05077e-08	13.3251	0	3.05077e-08	-0.841274	-14.1098		-0.318825	-0.522449	-0.867518	-16.8189	0	-0.0122189	-0.855299	0	0	0	0	-38.7497	-800.807
	43	377.104	3.87066	380.974		1.94453	1.92613			43	242.985		-21.699	-588.94		2063	-37.3905	-804.191	0.263788	-16.1388	2.8292e-08	13.3251	0	2.8292e-08	-0.841274	-14.951		-0.318825	-0.522449	-0.86663	-17.6856	0	-0.0113315	-0.855299	0	0	0	0	-38.8346	-839.642
	44	386.263	3.80848	390.071		1.89527	1.91321			44	248.464		-20.0901	-609.03		2064	-36.0712	-840.263	0.257791	-15.881	2.65498e-08	13.3251	0	2.65498e-08	-0.841274	-15.7923		-0.318825	-0.522449	-0.865932	-18.5515	0	-0.0106337	-0.855299	0	0	0	0	-37.5206	-877.162
	45	395.423	3.74711	399.17		1.8474	1.89971			45	253.915		-19.989	-629.019		2065	-36.1194	-876.382	0.252723	-15.6283	2.51471e-08	13.3251	0	2.51471e-08	-0.841274	-16.6336		-0.318825	-0.522449	-0.865371	-19.4169	0	-0.0100719	-0.855299	0	0	0	0	-37.5733	-914.736
	46	403.812	3.68654	407.499		1.80085	1.88568			46	259.343		-19.9032	-648.922		2066	-36.1622	-912.544	0.24831	-15.38	2.39891e-08	13.3251	0	2.39891e-08	-0.841274	-17.4749		-0.318825	-0.522449	-0.864907	-20.2818	0	-0.00960808	-0.855299	0	0	0	0	-37.62	-952.356
	47	412.194	3.62675	415.82		1.75557	1.87118			47	264.751		-19.8296	-668.752		2067	-36.1997	-948.744	0.244361	-15.1356	2.30087e-08	13.3251	0	2.30087e-08	-0.841274	-18.3161		-0.318825	-0.522449	-0.864514	-21.1463	0	-0.00921539	-0.855299	0	0	0	0	-37.6611	-990.017
	48	420.569	3.56774	424.137		1.71149	1.85625			48	270.142		-19.7665	-688.518		2068	-36.2329	-984.977	0.240738	-14.8949	2.21581e-08	13.3251	0	2.21581e-08	-0.841274	-19.1574		-0.318825	-0.522449	-0.864174	-22.0105	0	-0.00887474	-0.855299	0	0	0	0	-37.6976	-1027.71
	49	428.94	3.5095	432.45		1.66858	1.84092			49	275.112		-18.2224	-706.74		2069	-33.5798	-1018.56	0.237346	-14.6575	2.14037e-08	13.3251	0	2.14037e-08	-0.841274	-19.9987		-0.318825	-0.522449	-0.863871	-22.8743	0	-0.00857257	-0.855299	0	0	0	0	-35.0476	-1062.76
	50	250.406	117.514	367.92	8.22192	107.466	1.82594			50	280.063		-18.1553	-724.896		2070	-33.5776	-1052.13	0.234119	-14.4234	2.07213e-08	13.3251	0	2.07213e-08	-0.841274	-20.84		-0.318825	-0.522449	-0.863598	-23.7379	0	-0.00829928	-0.855299	0	0	0	0	-35.0484	-1097.81
	51	235.471	107.841	343.312		98.6261	9.21454			51	284.999		-18.0982	-742.994		2071	-33.5792	-1085.71	0.231009	-14.1924	2.0094e-08	13.3251	0	2.0094e-08	-0.841274	-21.6812		-0.318825	-0.522449	-0.863347	-24.6013	0	-0.00804801	-0.855299	0	0	0	0	-35.0529	-1132.86
	52	223.192	104.754	327.947		91.5144	13.2401			52	289.924		-18.0569	-761.051		2072	-33.5828	-1119.3	0.227984	-13.9644	1.95094e-08	13.3251	0	1.95094e-08	-0.841274	-22.5225		-0.318825	-0.522449	-0.863113	-25.4644	0	-0.00781386	-0.855299	0	0	0	0	-35.0592	-1167.92
	53	213.194	102.116	315.311		85.7258	16.3903			53	294.838		-18.0171	-779.068		2073	-33.5875	-1152.88	0.22502	-13.7394	1.89588e-08	13.3251	0	1.89588e-08	-0.841274	-23.3638		-0.318825	-0.522449	-0.862892	-26.3273	0	-0.00759335	-0.855299	0	0	0	0	-35.0667	-1202.99
	54	205.188	99.8243	305.012		80.9551	18.8692			54	299.396		-16.7129	-795.781		2074	-30.7614	-1183.65	0.222103	-13.5173	1.8436e-08	13.3251	0	1.8436e-08	-0.841274	-24.205		-0.318825	-0.522449	-0.862683	-27.19	0	-0.00738395	-0.855299	0	0	0	0	-32.2433	-1235.23
	55	198.944	97.8011	296.745		76.9713	20.8298			55	303.94		-16.6615	-812.442		2075	-30.732	-1214.38	0.219221	-13.2981	1.79364e-08	13.3251	0	1.79364e-08	-0.841274	-25.0463		-0.318825	-0.522449	-0.862483	-28.0524	0	-0.00718385	-0.855299	0	0	0	0	-32.2165	-1267.45
	56	194.283	95.9867	290.27		73.5991	22.3876			56	308.472		-16.6177	-829.06		2076	-30.7102	-1245.09	0.216367	-13.0817	1.74566e-08	13.3251	0	1.74566e-08	-0.841274	-25.8876		-0.318825	-0.522449	-0.862291	-28.9147	0	-0.00699171	-0.855299	0	0	0	0	-32.1974	-1299.65
	57	191.057	94.3353	285.392		70.7051	23.6301			57	312.994		-16.5804	-845.64		2077	-30.6944	-1275.78	0.213536	-12.8682	1.69943e-08	13.3251	0	1.69943e-08	-0.841274	-26.7289		-0.318825	-0.522449	-0.862105	-29.7768	0	-0.00680655	-0.855299	0	0	0	0	-32.1842	-1331.83
	58	189.141	92.8114	281.952		68.1873	24.6241			58	317.507		-16.5483	-862.189		2078	654.627	-621.154	-418.017	-430.885	158.643	171.968	158.643	1.69943e-08	-45.4301	-72.1589	-44.5888	-0.318825	-0.522449	-23.1934	-52.9702	-22.2718	-0.00680655	-0.855299	0	-0.0594749	-336.622	-336.622	-9.9919	-1341.82
	59	188.431	91.388	279.819		65.9673	25.4208			59	321.752		-15.5635	-877.752		2079	54.7601	-566.394	35.4692	-395.416	0.195766	172.164	0	0.195766	-0.841274	-73.0002		-0.318825	-0.522449	-2.21013	-55.1804		-1.29535	-0.855299	0	-0.0594749	0	-336.622	87.3737	-1254.45
	60	188.835	90.0444	278.88		63.9849	26.0595			60	325.986		-15.5257	-893.278		2080	45.0223	-521.372	11.316	-384.1	0.138427	172.302	0	0.138427	-0.841274	-73.8415		-0.318825	-0.522449	-1.96728	-57.1476		-1.0525	-0.855299	0	-0.0594749	0	-336.622	53.6681	-1200.78
	61	190.272	88.7644	279.036		62.1935	26.5709			61	330.211		-15.4932	-908.771		2081	36.6589	-484.713	9.67397	-374.426	0.097883	172.4	0	0.097883	-0.841274	-74.6828		-0.318825	-0.522449	-1.77953	-58.9272		-0.864758	-0.855299	0	-0.0594749	0	-336.622	43.8099	-1156.97
	62	192.666	87.5359	280.202		60.5572	26.9787			62	334.429		-15.4652	-924.236		2082	29.3588	-455.354	8.40341	-366.022	0.069214	172.469	0	0.069214	-0.841274	-75.524		-0.318825	-0.522449	-1.63374	-60.5609		-0.718961	-0.855299	0	-0.0594749	0	-336.622	35.3565	-1121.61
	63	195.951	86.3493	282.3		59.0477	27.3016			63	338.64		-15.441	-939.677		2083	22.8921	-432.462	7.41837	-358.604	0.0489419	172.518	0	0.0489419	-0.841274	-76.3653		-0.318825	-0.522449	-1.51998	-62.0809		-0.60521	-0.855299	0	-0.0594749	0	-336.622	27.9982	-1093.62
	64	200.063	85.1975	285.26		57.6432	27.5543			64	342.529		-14.2596	-953.937		2084	17.0904	-415.372	6.65266	-351.951	0.0346074	172.553	0	0.0346074	-0.841274	-77.2066		-0.318825	-0.522449	-1.43079	-63.5117		-0.516016	-0.855299	0	-0.0594749	0	-336.622	21.5057	-1072.11
	65	204.944	84.0748	289.018		56.3264	27.7484			65	346.407		-14.2193	-968.156		2085	11.8309	-403.541	6.05542	-345.896	0.0155515	172.568	0	0.0155515	-1.68255	-78.8891		-0.63765	-1.0449	-0.293216	-63.8049		-0.100451	-0.192765	0	0	0	-336.622	15.9262	-1056.18
	66	210.537	82.977	293.514		55.0837	27.8932			66	350.276		-14.1847	-982.341		2086	7.02363	-396.517	5.58754	-340.308	0.0109967	172.579	0	0.0109967	-1.68255	-80.5717		-0.63765	-1.0449	-0.280652	-64.0855		-0.0878868	-0.192765	0	0	0	-336.622	10.659	-1045.53
	67	216.792	81.9006	298.692		53.9045	27.996			67	354.136		-14.1547	-996.496		2087	2.60238	-393.915	5.219	-335.089	0.00777596	172.587	0	0.00777596	-1.68255	-82.2542		-0.63765	-1.0449	-0.270627	-64.3562		-0.0778618	-0.192765	0	0	0	-336.622	5.87598	-1039.65
	68	223.656	80.8432	304.499		52.7802	28.0629			68	358.007		-14.1943	-1010.69		2088	-1.48191	-395.397	4.92676	-330.163	0.00549854	172.592	0	0.00549854	-1.68255	-83.9368		-0.63765	-1.0449	-0.262573	-64.6187		-0.0698081	-0.192765	0	0	0	-336.622	1.50523	-1038.14
	69	231.081	79.8027	310.884		51.704	28.0988			69	361.578		-13.0916	-1023.78		2089	-5.26639	-400.663	4.69314	-325.469	0.00388815	172.596	0	0.00388815	-1.68255	-85.6193		-0.63765	-1.0449	-0.256054	-64.8748		-0.0632891	-0.192765	0	0	0	-336.622	-2.50796	-1040.65
	70	239.02	78.7778	317.797		50.6703	28.1075			70	365.139		-13.0578	-1036.84		2090	-8.77949	-409.443	4.50457	-320.965	0.00274943	172.599	0	0.00274943	-1.68255	-87.3019		-0.63765	-1.0449	-0.250734	-65.1255		-0.0579691	-0.192765	0	0	0	-336.622	-6.20545	-1046.86
	71	231.313	89.8941	321.207	4.95963	56.8177	28.1167			71	368.692		-13.0286	-1049.87		2091	-12.0439	-421.486	4.35064	-316.614	0.00194423	172.601	0	0.00194423	-1.68255	-88.9844		-0.63765	-1.0449	-0.246353	-65.3719		-0.0535887	-0.192765	0	0	0	-336.622	-9.62024	-1056.48
	72	237.694	83.5438	321.238		54.793	28.7508			72	372.239		-13.0033	-1062.87		2092	-15.0777	-436.564	4.22335	-312.391	0.00137486	172.602	0	0.00137486	-1.68255	-90.667		-0.63765	-1.0449	-0.242712	-65.6146		-0.0499472	-0.192765	0	0	0	-336.622	-12.7783	-1069.26
	73	244.775	82.256	327.031		53.0851	29.1708			73	375.779		-12.9809	-1075.85		2093	-17.8959	-454.46	4.11656	-308.274	0.000972256	172.603	0	0.000972256	-1.68255	-92.3495		-0.63765	-1.0449	-0.239654	-65.8543		-0.0468889	-0.192765	0	0	0	-336.622	-15.7006	-1084.96
	74	252.449	81.0441	333.493		51.6087	29.4354			74	378.979		-11.733	-1087.59		2094	-20.5107	-474.971	4.02554	-304.249	0.000687568	172.604	0	0.000687568	-1.68255	-94.0321		-0.63765	-1.0449	-0.237057	-66.0913		-0.0442926	-0.192765	0	0	0	-336.622	-18.4041	-1103.36
	75	261.038	79.8894	340.928		50.303	29.5864			75	382.167		-11.6891	-1099.27		2095	-22.9322	-497.903	3.94668	-300.302	0.000486259	172.605	0	0.000486259	-1.68255	-95.7146		-0.63765	-1.0449	-0.234829	-66.3261		-0.042064	-0.192765	0	0	0	-336.622	-20.9024	-1124.26
	76	269.304	78.7785	348.082		49.1249	29.6536			76	385.344		-11.6509	-1110.93		2096	-25.1684	-523.071	3.87718	-296.425	0.00034391	172.605	0	0.00034391	-1.68255	-97.3972		-0.63765	-1.0449	-0.232894	-66.559		-0.0401291	-0.192765	0	0	0	-336.622	-23.2063	-1147.47
	77	277.737	77.7018	355.439		48.0436	29.6582			77	388.513		-11.6174	-1122.54		2097	-27.2256	-550.297	3.8149	-292.61	0.000243252	172.605	0	0.000243252	-1.68255	-99.0797		-0.63765	-1.0449	-0.231195	-66.7902		-0.0384303	-0.192765	0	0	0	-336.622	-25.3242	-1172.79
	78	286.315	76.6527	362.967		47.0369	29.6157			78	391.673		-11.5877	-1134.13		2098	-29.1086	-579.405	3.75818	-288.852	0.000172074	172.605	0	0.000172074	-1.68255	-100.762		-0.63765	-1.0449	-0.229687	-67.0199		-0.036922	-0.192765	0	0	0	-336.622	-27.2625	-1200.06
	79	295.019	75.6263	370.645		46.0892	29.5371			79	394.647		-10.9046	-1145.03		2099	28.2574	-551.148	-40.7597	-329.612	5.89236	178.498	5.89176	0.000600351	-17.6353	-118.398	-15.9528	-0.63765	-1.0449	-0.853094	-67.873	-0.880131	0.219802	-0.192765	0	0	0	-336.622	-25.0983	-1225.15
	80	304.096	74.6192	378.715		45.189	29.4303			80	397.611		-10.8671	-1155.9		2100	-23.3968	-574.545	23.2842	-306.327	8.64165e-05	178.498	0	8.64165e-05	-1.68255	-120.08		-0.63765	-1.0449	-0.265133	-68.1381		-0.0723685	-0.192765	0	0	0	-336.622	-2.06018	-1227.21
	81	313.27	73.6291	386.9		44.328	29.3012			81	400.565		-10.8334	-1166.74		2101	-25.9644	-600.509	4.72222	-301.605	6.11752e-05	178.498	0	6.11752e-05	-1.68255	-121.763		-0.63765	-1.0449	-0.253813	-68.392		-0.0610481	-0.192765	0	0	0	-336.622	-23.1785	-1250.39
	82	322.531	72.6543	395.185		43.5002	29.1541			82	403.511		-10.8033	-1177.54		2102	-28.1377	-628.647	4.44339	-297.162	4.3325e-05	178.498	0	4.3325e-05	-1.68255	-123.445		-0.63765	-1.0449	-0.245542	-68.6375		-0.0527767	-0.192765	0	0	0	-336.622	-25.6224	-1276.02
	83	331.867	71.6934	403.56		42.7012	28.9922			83	406.45		-10.776	-1188.31		2103	-31.493	-660.14	4.23386	-292.928	3.07013e-05	178.498	0	3.07013e-05	-1.68255	-125.128		-0.63765	-1.0449	-0.239438	-68.8769		-0.0466735	-0.192765	0	0	0	-336.622	-29.1811	-1305.2
	84	341.271	70.7457	412.016		41.9277	28.8179			84	408.192		-6.38738	-1194.7		2104	-30.3066	-690.446	4.07344	-288.855	2.17732e-05	178.498	0	2.17732e-05	-1.68255	-126.81		-0.63765	-1.0449	-0.234879	-69.1118		-0.0421142	-0.192765	0	0	0	-336.622	-28.1506	-1333.35
	85	350.356	69.8104	420.166		41.1772	28.6332			85	409.898		-6.2551	-1200.96		2105	-30.9215	-721.368	3.94783	-284.907	1.54585e-05	178.498	0	1.54585e-05	-1.68255	-128.493		-0.63765	-1.0449	-0.231421	-69.3432		-0.0386563	-0.192765	0	0	0	-336.622	-28.8876	-1362.23
	86	359.492	68.8871	428.379		40.4478	28.4393			86	411.573		-6.13887	-1207.1		2106	-31.4525	-752.821	3.84689	-281.06	1.09917e-05	178.498	0	1.09917e-05	-1.68255	-130.175		-0.63765	-1.0449	-0.228751	-69.572		-0.0359863	-0.192765	0	0	0	-336.622	-29.5169	-1391.75
	87	368.674	67.9755	436.649		39.738	28.2375			87	413.219		-6.03548	-1213.13		2107	-31.9141	-784.735	3.76347	-277.296	7.83171e-06	178.498	0	7.83171e-06	-1.68255	-131.858		-0.63765	-1.0449	-0.226646	-69.7986		-0.0338814	-0.192765	0	0	0	-336.622	-30.0598	-1421.81
	88	377.897	67.0753	444.973		39.0466	28.0287			88	414.839		-5.94241	-1219.07		2108	-33.2832	-818.018	3.69248	-273.604	5.59576e-06	178.498	0	5.59576e-06	-1.68255	-133.54		-0.63765	-1.0449	-0.224948	-70.0236		-0.0321837	-0.192765	0	0	0	-336.622	-31.4983	-1453.31
	89	387.158	66.1864	453.345		38.3727	27.8137			89	416.17		-4.88069	-1223.95		2109	-33.6402	-851.658	3.63034	-269.974	4.01329e-06	178.498	0	4.01329e-06	-1.68255	-135.223		-0.63765	-1.0449	-0.223546	-70.2471		-0.0307811	-0.192765	0	0	0	-336.622	-31.916	-1485.23
	90	395.722	65.3084	461.03		37.7154	27.5931			90	417.475		-4.78507	-1228.74		2110	-33.9547	-885.613	3.57451	-266.399	2.89294e-06	178.498	0	2.89294e-06	-1.68255	-136.906		-0.63765	-1.0449	-0.222358	-70.4695		-0.0295936	-0.192765	0	0	0	-336.622	-32.2851	-1517.51
	91	404.309	64.4414	468.75		37.074	27.3675			91	418.757		-4.69816	-1233.44		2111	-34.2328	-919.846	3.52318	-262.876	2.09939e-06	178.498	0	2.09939e-06	-1.68255	-138.588		-0.63765	-1.0449	-0.221329	-70.6908		-0.0285645	-0.192765	0	0	0	-336.622	-32.6135	-1550.12
	92	412.918	63.5852	476.504		36.4479	27.1373			92	420.016		-4.61831	-1238.06		2112	-34.4797	-954.325	3.47509	-259.401	1.53698e-06	178.498	0	1.53698e-06	-1.68255	-140.271		-0.63765	-1.0449	-0.220418	-70.9112		-0.0276532	-0.192765	0	0	0	-336.622	-32.9076	-1583.03
	93	421.549	62.7397	484.289		35.8366	26.9032			93	421.256		-4.54422	-1242.6		2113	-33.3127	-987.638	3.42934	-255.971	1.13804e-06	178.498	0	1.13804e-06	-1.68255	-141.953		-0.63765	-1.0449	-0.219596	-71.1308		-0.0268309	-0.192765	0	0	0	-336.622	-31.7855	-1614.82
	94	430.2	61.9048	492.105		35.2395	26.6653			94	422.476		-4.47498	-1247.08		2114	-33.4991	-1021.14	3.38529	-252.586	8.54733e-07	178.498	0	8.54733e-07	-1.68255	-143.636		-0.63765	-1.0449	-0.218842	-71.3497		-0.0260768	-0.192765	0	0	0	-336.622	-32.0152	-1646.83
	95	438.097	61.0805	499.178		34.6563	26.4242			95	423.679		-4.40976	-1251.48		2115	-33.6674	-1054.8	3.34251	-249.244	6.53225e-07	178.498	0	6.53225e-07	-1.68255	-145.318		-0.63765	-1.0449	-0.218141	-71.5678		-0.025376	-0.192765	0	0	0	-336.622	-32.2256	-1679.06
	96	446.003	60.2666	506.269		34.0865	26.1801			96	424.864		-4.34804	-1255.83		2116	-33.8194	-1088.62	3.30068	-245.943	5.09592e-07	178.498	0	5.09592e-07	-1.68255	-147.001		-0.63765	-1.0449	-0.217483	-71.7853		-0.0247178	-0.192765	0	0	0	-336.622	-32.4187	-1711.48
	97	453.917	59.4631	513.38		33.5297	25.9334			97	426.034		-4.28925	-1260.12		2117	-33.9572	-1122.58	3.25959	-242.683	4.06915e-07	178.498	0	4.06915e-07	-1.68255	-148.683		-0.63765	-1.0449	-0.216859	-72.0022		-0.0240944	-0.192765	0	0	0	-336.622	-32.597	-1744.07
	98	461.841	58.6699	520.511		32.9855	25.6844			98	427.189		-4.23307	-1264.36		2118	-31.3998	-1153.98	3.21907	-239.464	3.33232e-07	178.498	0	3.33232e-07	-1.68255	-150.366		-0.63765	-1.0449	-0.216265	-72.2184		-0.0235001	-0.192765	0	0	0	-336.622	-30.0795	-1774.15
	99	469.775	57.8869	527.662		32.4535	25.4334			99	428.329		-4.1791	-1268.53		2119	-31.4856	-1185.47	3.17904	-236.285	2.8008e-07	178.498	0	2.8008e-07	-1.68255	-152.049		-0.63765	-1.0449	-0.215696	-72.4341		-0.0229308	-0.192765	0	0	0	-336.622	-30.2048	-1804.36
	100	288.179	177.741	465.92	10.907	139.448	27.3859			100	429.454		-4.12711	-1272.66		2120	-31.5679	-1217.03	3.13941	-233.146	2.41475e-07	178.498	0	2.41475e-07	-1.68255	-153.731		-0.63765	-1.0449	-0.215148	-72.6493		-0.0223832	-0.192765	0	0	0	-336.622	-30.3262	-1834.68
																Further Ambition targets scenario
																	9th planting (Mg CO2 eq)																							Plantation (Core)
																Year	Terrestrial C storage		HWP C storage		Forestry/ wood processing emissions (total)		Forestry/ primary wood processing emissions	Secondary wood processing emissions	(BE)CCS (total)		(BE)CCS (primary)	(BE)CCS (secondary)	(BE)CCS (tertiary)	FF offset (total)		Primary electricity offset (biomass + incineration)	Secondary electricity offset (biomass + incineration)	Tertiary electricity offset (biomass + incineration)	Heat offset (biomass)	Heat offset (incineration)	Concrete offset (net)		Net - annual flux	Net - cumulative C sequestration
																	Annual flux	Accumulation	Annual flux	Accumulation	Annual flux	Accumulation			Annual flux	Accumulation				Annual flux	Accumulation						Annual flux	Accumulation
																2020
																2021
																2022
																2023
																2024
																2025
																2026
																2027
																2028	0	0	0	0	5.00358	5.00358	5.00358	0	0	0	0	0	0	0	0	0	0	0	0	0	0	0	5.00358	5.00358
																2029	0.599623	0.599623	0	0	0	5.00358	0	0	0	0	0	0	0	0	0	0	0	0	0	0	0	0	0.599623	5.6032
																2030	-0.507923	0.0917007	0	0	0	5.00358	0	0	0	0	0	0	0	0	0	0	0	0	0	0	0	0	-0.507923	5.09528
																2031	-1.92493	-1.83323	0	0	0	5.00358	0	0	0	0	0	0	0	0	0	0	0	0	0	0	0	0	-1.92493	3.17035
																2032	-3.55635	-5.38958	0	0	0	5.00358	0	0	0	0	0	0	0	0	0	0	0	0	0	0	0	0	-3.55635	-0.386001
																2033	-5.35193	-10.7415	0	0	0	5.00358	0	0	0	0	0	0	0	0	0	0	0	0	0	0	0	0	-5.35193	-5.73793
																2034	-7.27359	-18.0151	0	0	0	5.00358	0	0	0	0	0	0	0	0	0	0	0	0	0	0	0	0	-7.27359	-13.0115
																2035	-9.28859	-27.3037	0	0	0	5.00358	0	0	0	0	0	0	0	0	0	0	0	0	0	0	0	0	-9.28859	-22.3001
																2036	-11.3672	-38.6709	0	0	0	5.00358	0	0	0	0	0	0	0	0	0	0	0	0	0	0	0	0	-11.3672	-33.6673
																2037	-13.4824	-52.1533	0	0	0	5.00358	0	0	0	0	0	0	0	0	0	0	0	0	0	0	0	0	-13.4824	-47.1497
																2038	-15.6095	-67.7629	0	0	0	5.00358	0	0	0	0	0	0	0	0	0	0	0	0	0	0	0	0	-15.6095	-62.7593
																2039	-17.7267	-85.4896	0	0	0	5.00358	0	0	0	0	0	0	0	0	0	0	0	0	0	0	0	0	-17.7267	-80.486
																2040	-19.8148	-105.304	0	0	0	5.00358	0	0	0	0	0	0	0	0	0	0	0	0	0	0	0	0	-19.8148	-100.301
																2041	-21.8574	-127.162	0	0	0	5.00358	0	0	0	0	0	0	0	0	0	0	0	0	0	0	0	0	-21.8574	-122.158
																2042	-23.8412	-151.003	0	0	0	5.00358	0	0	0	0	0	0	0	0	0	0	0	0	0	0	0	0	-23.8412	-145.999
																2043	-25.7549	-176.758	0	0	0	5.00358	0	0	0	0	0	0	0	0	0	0	0	0	0	0	0	0	-25.7549	-171.754
																2044	-27.5896	-204.347	0	0	0	5.00358	0	0	0	0	0	0	0	0	0	0	0	0	0	0	0	0	-27.5896	-199.344
																2045	-29.338	-233.685	0	0	0	5.00358	0	0	0	0	0	0	0	0	0	0	0	0	0	0	0	0	-29.338	-228.682
																2046	-30.9935	-264.679	0	0	0	5.00358	0	0	0	0	0	0	0	0	0	0	0	0	0	0	0	0	-30.9935	-259.675
																2047	-32.5507	-297.23	0	0	0	5.00358	0	0	0	0	0	0	0	0	0	0	0	0	0	0	0	0	-32.5507	-292.226
																2048	-34.0044	-331.234	0	0	0	5.00358	0	0	0	0	0	0	0	0	0	0	0	0	0	0	0	0	-34.0044	-326.23
																2049	17.6073	-313.627	-24.8113	-24.8113	5.09947	10.103	5.09947	0	-15.866	-15.866	-14.1835	-0.63765	-1.0449	-0.782518	-0.782518	-0.782518	0	0	0	0	0	0	-18.7531	-344.983
																2050	-28.3006	-341.927	2.80517	-22.0061	1.01501e-07	10.103	0	1.01501e-07	-1.8695	-17.7355		-0.7085	-1.161	0	-0.782518	0	0	0	0	0	0	0	-27.3649	-372.348
																2051	-30.5355	-372.463	0.986722	-21.0194	7.4279e-08	10.103	0	7.4279e-08	-1.8695	-19.605		-0.7085	-1.161	0	-0.782518	0	0	0	0	0	0	0	-31.4182	-403.767
																2052	-32.4275	-404.89	0.778555	-20.2408	5.49641e-08	10.103	0	5.49641e-08	-1.8695	-21.4745		-0.7085	-1.161	0	-0.782518	0	0	0	0	0	0	0	-33.5184	-437.285
																2053	-34.0251	-438.915	0.630603	-19.6102	4.12419e-08	10.103	0	4.12419e-08	-1.8695	-23.344		-0.7085	-1.161	0	-0.782518	0	0	0	0	0	0	0	-35.264	-472.549
																2054	-36.8851	-475.8	0.52522	-19.085	3.14762e-08	10.103	0	3.14762e-08	-1.8695	-25.2135		-0.7085	-1.161	0	-0.782518	0	0	0	0	0	0	0	-38.2294	-510.778
																2055	-35.2691	-511.07	0.449927	-18.6351	2.45097e-08	10.103	0	2.45097e-08	-1.8695	-27.083		-0.7085	-1.161	0	-0.782518	0	0	0	0	0	0	0	-36.6886	-547.467
																2056	-35.5086	-546.578	0.395902	-18.2392	1.95244e-08	10.103	0	1.95244e-08	-1.8695	-28.9525		-0.7085	-1.161	0	-0.782518	0	0	0	0	0	0	0	-36.9822	-584.449
																2057	-35.7094	-582.288	0.356909	-17.8823	1.59415e-08	10.103	0	1.59415e-08	-1.8695	-30.822		-0.7085	-1.161	0	-0.782518	0	0	0	0	0	0	0	-37.222	-621.671
																2058	-35.8788	-618.166	0.328537	-17.5537	1.33519e-08	10.103	0	1.33519e-08	-1.8695	-32.6915		-0.7085	-1.161	0	-0.782518	0	0	0	0	0	0	0	-37.4197	-659.091
																2059	-36.9884	-655.155	0.30767	-17.2461	1.14662e-08	10.103	0	1.14662e-08	-1.8695	-34.561		-0.7085	-1.161	0	-0.782518	0	0	0	0	0	0	0	-38.5502	-697.641
																2060	-37.1136	-692.268	0.292104	-16.954	1.00797e-08	10.103	0	1.00797e-08	-1.8695	-36.4305		-0.7085	-1.161	0	-0.782518	0	0	0	0	0	0	0	-38.691	-736.332
																2061	-37.2206	-729.489	0.280281	-16.6737	9.04763e-09	10.103	0	9.04763e-09	-1.8695	-38.3		-0.7085	-1.161	0	-0.782518	0	0	0	0	0	0	0	-38.8098	-775.142
																2062	-37.312	-766.801	0.271101	-16.4026	8.2676e-09	10.103	0	8.2676e-09	-1.8695	-40.1695		-0.7085	-1.161	0	-0.782518	0	0	0	0	0	0	0	-38.9104	-814.052
																2063	-37.3905	-804.191	0.263788	-16.1388	7.66714e-09	10.103	0	7.66714e-09	-1.8695	-42.039		-0.7085	-1.161	0	-0.782518	0	0	0	0	0	0	0	-38.9962	-853.049
																2064	-36.0712	-840.263	0.257791	-15.881	7.19499e-09	10.103	0	7.19499e-09	-1.8695	-43.9085		-0.7085	-1.161	0	-0.782518	0	0	0	0	0	0	0	-37.6829	-890.731
																2065	-36.1194	-876.382	0.252723	-15.6283	6.81486e-09	10.103	0	6.81486e-09	-1.8695	-45.778		-0.7085	-1.161	0	-0.782518	0	0	0	0	0	0	0	-37.7362	-928.468
																2066	-36.1622	-912.544	0.24831	-15.38	6.50104e-09	10.103	0	6.50104e-09	-1.8695	-47.6475		-0.7085	-1.161	0	-0.782518	0	0	0	0	0	0	0	-37.7834	-966.251
																2067	-36.1997	-948.744	0.244361	-15.1356	6.23535e-09	10.103	0	6.23535e-09	-1.8695	-49.517		-0.7085	-1.161	0	-0.782518	0	0	0	0	0	0	0	-37.8248	-1004.08
																2068	-36.2329	-984.977	0.240738	-14.8949	6.00485e-09	10.103	0	6.00485e-09	-1.8695	-51.3865		-0.7085	-1.161	0	-0.782518	0	0	0	0	0	0	0	-37.8616	-1041.94
																2069	-33.5798	-1018.56	0.237346	-14.6575	5.8004e-09	10.103	0	5.8004e-09	-1.8695	-53.256		-0.7085	-1.161	0	-0.782518	0	0	0	0	0	0	0	-35.212	-1077.15
																2070	-33.5776	-1052.13	0.234119	-14.4234	5.61548e-09	10.103	0	5.61548e-09	-1.8695	-55.1255		-0.7085	-1.161	0	-0.782518	0	0	0	0	0	0	0	-35.213	-1112.36
																2071	-33.5792	-1085.71	0.231009	-14.1924	5.44546e-09	10.103	0	5.44546e-09	-1.8695	-56.995		-0.7085	-1.161	0	-0.782518	0	0	0	0	0	0	0	-35.2177	-1147.58
																2072	-33.5828	-1119.3	0.227984	-13.9644	5.28704e-09	10.103	0	5.28704e-09	-1.8695	-58.8645		-0.7085	-1.161	0	-0.782518	0	0	0	0	0	0	0	-35.2243	-1182.8
																2073	-33.5875	-1152.88	0.22502	-13.7394	5.13784e-09	10.103	0	5.13784e-09	-1.8695	-60.734		-0.7085	-1.161	0	-0.782518	0	0	0	0	0	0	0	-35.232	-1218.04
																2074	-30.7614	-1183.65	0.222103	-13.5173	4.99615e-09	10.103	0	4.99615e-09	-1.8695	-62.6034		-0.7085	-1.161	0	-0.782518	0	0	0	0	0	0	0	-32.4088	-1250.45
																2075	-30.732	-1214.38	0.219221	-13.2981	4.86076e-09	10.103	0	4.86076e-09	-1.8695	-64.4729		-0.7085	-1.161	0	-0.782518	0	0	0	0	0	0	0	-32.3822	-1282.83
																2076	-30.7102	-1245.09	0.216367	-13.0817	4.73075e-09	10.103	0	4.73075e-09	-1.8695	-66.3424		-0.7085	-1.161	0	-0.782518	0	0	0	0	0	0	0	-32.3634	-1315.19
																2077	-30.6944	-1275.78	0.213536	-12.8682	4.60547e-09	10.103	0	4.60547e-09	-1.8695	-68.2119		-0.7085	-1.161	0	-0.782518	0	0	0	0	0	0	0	-32.3503	-1347.54
																2078	654.627	-621.154	-418.017	-430.885	42.9922	53.0952	42.9922	4.60547e-09	-100.956	-169.168	-99.0862	-0.7085	-1.161	-0.00260599	-0.785124	0	0	0	0	-0.00260599	-149.102	-149.102	29.5421	-1318
																2079	54.7601	-566.394	35.4692	-395.416	0.0530527	53.1483	0	0.0530527	-1.8695	-171.037		-0.7085	-1.161	-0.00260599	-0.78773		0	0	0	-0.00260599	0	-149.102	88.4103	-1229.59
																2080	45.0223	-521.372	11.316	-384.1	0.0375137	53.1858	0	0.0375137	-1.8695	-172.907		-0.7085	-1.161	-0.00260599	-0.790336		0	0	0	-0.00260599	0	-149.102	54.5036	-1175.09
																2081	36.6589	-484.713	9.67397	-374.426	0.0265263	53.2123	0	0.0265263	-1.8695	-174.776		-0.7085	-1.161	-0.00260599	-0.792942		0	0	0	-0.00260599	0	-149.102	44.4873	-1130.6
																2082	29.3588	-455.354	8.40341	-366.022	0.018757	53.2311	0	0.018757	-1.8695	-176.646		-0.7085	-1.161	-0.00260599	-0.795548		0	0	0	-0.00260599	0	-149.102	35.9089	-1094.69
																2083	22.8921	-432.462	7.41837	-358.604	0.0132633	53.2443	0	0.0132633	-1.8695	-178.515		-0.7085	-1.161	-0.00260599	-0.798154		0	0	0	-0.00260599	0	-149.102	28.4516	-1066.24
																2084	17.0904	-415.372	6.65266	-351.951	0.0093786	53.2537	0	0.0093786	-1.8695	-180.385		-0.7085	-1.161	-0.00260599	-0.80076		0	0	0	-0.00260599	0	-149.102	21.8804	-1044.36
																2085	11.8309	-403.541	6.05542	-345.896	0.00464955	53.2584	0	0.00464955	-1.8695	-182.254		-0.7085	-1.161	0	-0.80076		0	0	0	0	0	-149.102	16.0215	-1028.34
																2086	7.02363	-396.517	5.58754	-340.308	0.00328777	53.2617	0	0.00328777	-1.8695	-184.124		-0.7085	-1.161	0	-0.80076		0	0	0	0	0	-149.102	10.745	-1017.59
																2087	2.60238	-393.915	5.219	-335.089	0.00232483	53.264	0	0.00232483	-1.8695	-185.993		-0.7085	-1.161	0	-0.80076		0	0	0	0	0	-149.102	5.95421	-1011.64
																2088	-1.48191	-395.397	4.92676	-330.163	0.00164394	53.2656	0	0.00164394	-1.8695	-187.863		-0.7085	-1.161	0	-0.80076		0	0	0	0	0	-149.102	1.577	-1010.06
																2089	-5.26639	-400.663	4.69314	-325.469	0.00116247	53.2668	0	0.00116247	-1.8695	-189.732		-0.7085	-1.161	0	-0.80076		0	0	0	0	0	-149.102	-2.44158	-1012.5
																2090	-8.77949	-409.443	4.50457	-320.965	0.000822017	53.2676	0	0.000822017	-1.8695	-191.602		-0.7085	-1.161	0	-0.80076		0	0	0	0	0	-149.102	-6.14359	-1018.64
																2091	-12.0439	-421.486	4.35064	-316.614	0.00058128	53.2682	0	0.00058128	-1.8695	-193.471		-0.7085	-1.161	0	-0.80076		0	0	0	0	0	-149.102	-9.5622	-1028.21
																2092	-15.0777	-436.564	4.22335	-312.391	0.000411053	53.2686	0	0.000411053	-1.8695	-195.341		-0.7085	-1.161	0	-0.80076		0	0	0	0	0	-149.102	-12.7235	-1040.93
																2093	-17.8959	-454.46	4.11656	-308.274	0.000290682	53.2689	0	0.000290682	-1.8695	-197.21		-0.7085	-1.161	0	-0.80076		0	0	0	0	0	-149.102	-15.6486	-1056.58
																2094	-20.5107	-474.971	4.02554	-304.249	0.000205567	53.2691	0	0.000205567	-1.8695	-199.08		-0.7085	-1.161	0	-0.80076		0	0	0	0	0	-149.102	-18.3545	-1074.93
																2095	-22.9322	-497.903	3.94668	-300.302	0.00014538	53.2692	0	0.00014538	-1.8695	-200.949		-0.7085	-1.161	0	-0.80076		0	0	0	0	0	-149.102	-20.8548	-1095.79
																2096	-25.1684	-523.071	3.87718	-296.425	0.000102821	53.2693	0	0.000102821	-1.8695	-202.819		-0.7085	-1.161	0	-0.80076		0	0	0	0	0	-149.102	-23.1606	-1118.95
																2097	-27.2256	-550.297	3.8149	-292.61	7.27268e-05	53.2694	0	7.27268e-05	-1.8695	-204.688		-0.7085	-1.161	0	-0.80076		0	0	0	0	0	-149.102	-25.2801	-1144.23
																2098	-29.1086	-579.405	3.75818	-288.852	5.14462e-05	53.2695	0	5.14462e-05	-1.8695	-206.558		-0.7085	-1.161	0	-0.80076		0	0	0	0	0	-149.102	-27.2198	-1171.45
																2099	28.2574	-551.148	-40.7597	-329.612	1.76168	55.0311	1.7615	0.000179491	-19.5948	-226.152	-17.7253	-0.7085	-1.161	0	-0.80076	0	0	0	0	0	0	-149.102	-30.3354	-1201.78
																2100	-23.3968	-574.545	23.2842	-306.327	2.58365e-05	55.0312	0	2.58365e-05	-1.8695	-228.022		-0.7085	-1.161	0	-0.80076		0	0	0	0	0	-149.102	-1.98206	-1203.77
																2101	-25.9644	-600.509	4.72222	-301.605	1.829e-05	55.0312	0	1.829e-05	-1.8695	-229.891		-0.7085	-1.161	0	-0.80076		0	0	0	0	0	-149.102	-23.1116	-1226.88
																2102	-28.1377	-628.647	4.44339	-297.162	1.29532e-05	55.0312	0	1.29532e-05	-1.8695	-231.761		-0.7085	-1.161	0	-0.80076		0	0	0	0	0	-149.102	-25.5638	-1252.44
																2103	-31.493	-660.14	4.23386	-292.928	9.17898e-06	55.0312	0	9.17898e-06	-1.8695	-233.63		-0.7085	-1.161	0	-0.80076		0	0	0	0	0	-149.102	-29.1286	-1281.57
																2104	-30.3066	-690.446	4.07344	-288.855	6.5097e-06	55.0312	0	6.5097e-06	-1.8695	-235.5		-0.7085	-1.161	0	-0.80076		0	0	0	0	0	-149.102	-28.1026	-1309.67
																2105	-30.9215	-721.368	3.94783	-284.907	4.62174e-06	55.0312	0	4.62174e-06	-1.8695	-237.369		-0.7085	-1.161	0	-0.80076		0	0	0	0	0	-149.102	-28.8432	-1338.52
																2106	-31.4525	-752.821	3.84689	-281.06	3.28627e-06	55.0312	0	3.28627e-06	-1.8695	-239.239		-0.7085	-1.161	0	-0.80076		0	0	0	0	0	-149.102	-29.4751	-1367.99
																2107	-31.9141	-784.735	3.76347	-277.296	2.3415e-06	55.0312	0	2.3415e-06	-1.8695	-241.108		-0.7085	-1.161	0	-0.80076		0	0	0	0	0	-149.102	-30.0201	-1398.01
																2108	-33.2832	-818.018	3.69248	-273.604	1.67301e-06	55.0312	0	1.67301e-06	-1.8695	-242.978		-0.7085	-1.161	0	-0.80076		0	0	0	0	0	-149.102	-31.4603	-1429.47
																2109	-33.6402	-851.658	3.63034	-269.974	1.19988e-06	55.0312	0	1.19988e-06	-1.8695	-244.847		-0.7085	-1.161	0	-0.80076		0	0	0	0	0	-149.102	-31.8794	-1461.35
																2110	-33.9547	-885.613	3.57451	-266.399	8.64922e-07	55.0312	0	8.64922e-07	-1.8695	-246.717		-0.7085	-1.161	0	-0.80076		0	0	0	0	0	-149.102	-32.2497	-1493.6
																2111	-34.2328	-919.846	3.52318	-262.876	6.2767e-07	55.0312	0	6.2767e-07	-1.8695	-248.586		-0.7085	-1.161	0	-0.80076		0	0	0	0	0	-149.102	-32.5791	-1526.18
																2112	-34.4797	-954.325	3.47509	-259.401	4.59522e-07	55.0312	0	4.59522e-07	-1.8695	-250.456		-0.7085	-1.161	0	-0.80076		0	0	0	0	0	-149.102	-32.8741	-1559.05
																2113	-33.3127	-987.638	3.42934	-255.971	3.40248e-07	55.0312	0	3.40248e-07	-1.8695	-252.325		-0.7085	-1.161	0	-0.80076		0	0	0	0	0	-149.102	-31.7528	-1590.81
																2114	-33.4991	-1021.14	3.38529	-252.586	2.55546e-07	55.0312	0	2.55546e-07	-1.8695	-254.195		-0.7085	-1.161	0	-0.80076		0	0	0	0	0	-149.102	-31.9833	-1622.79
																2115	-33.6674	-1054.8	3.34251	-249.244	1.95299e-07	55.0312	0	1.95299e-07	-1.8695	-256.064		-0.7085	-1.161	0	-0.80076		0	0	0	0	0	-149.102	-32.1944	-1654.98
																2116	-33.8194	-1088.62	3.30068	-245.943	1.52356e-07	55.0312	0	1.52356e-07	-1.8695	-257.934		-0.7085	-1.161	0	-0.80076		0	0	0	0	0	-149.102	-32.3882	-1687.37
																2117	-33.9572	-1122.58	3.25959	-242.683	1.21658e-07	55.0312	0	1.21658e-07	-1.8695	-259.803		-0.7085	-1.161	0	-0.80076		0	0	0	0	0	-149.102	-32.5671	-1719.94
																2118	-31.3998	-1153.98	3.21907	-239.464	9.96288e-08	55.0312	0	9.96288e-08	-1.8695	-261.673		-0.7085	-1.161	0	-0.80076		0	0	0	0	0	-149.102	-30.0502	-1749.99
																2119	-31.4856	-1185.47	3.17904	-236.285	8.37375e-08	55.0312	0	8.37375e-08	-1.8695	-263.542		-0.7085	-1.161	0	-0.80076		0	0	0	0	0	-149.102	-30.1761	-1780.17
																2120	-31.5679	-1217.03	3.13941	-233.146	7.21956e-08	55.0312	0	7.21956e-08	-1.8695	-265.412		-0.7085	-1.161	0	-0.80076		0	0	0	0	0	-149.102	-30.298	-1810.46

[truncated: 33 more sheets: Yr10, Yr11, Yr12, Yr13, Yr14, Yr15, Yr16, Yr17, Yr18, Yr19, Yr20, Yr21, Yr22, Yr23, Yr24, Yr25, Yr26, Yr27, Yr28, Yr29 …]
